# Supplementary material for: Positional Isomerism in the N^N Ligand: How Much Difference Does a Methyl Group Make in [Cu(P^P)(N^N)]+ Complexes?
Source: Molecules. 2020 Jun 15;25(12):2760. doi: 10.3390/molecules25122760 (PMC7356218; doi:10.3390/molecules25122760)
Supplement: Supplementary file 1 [file molecules-25-02760-s001.zip]

Archive with 14 entries (14 files):
- Supporting Information.docx
- __MACOSX/._Supporting Information.docx
- BRF212_130K.cif
- __MACOSX/._BRF212_130K.cif
- BRF212checkcif.pdf
- __MACOSX/._BRF212checkcif.pdf
- BRF213_130K.cif
- __MACOSX/._BRF213_130K.cif
- BRF213checkcif.pdf
- __MACOSX/._BRF213checkcif.pdf
- BRF214_130K_0m.cif
- __MACOSX/._BRF214_130K_0m.cif
- BRF214checkcif.pdf
- __MACOSX/._BRF214checkcif.pdf
