# Supplementary material for: Positional Isomerism in the N^N Ligand: How Much Difference Does a Methyl Group Make in [Cu(P^P)(N^N)]+ Complexes?
Source: Molecules. 2020 Jun 15;25(12):2760. doi: 10.3390/molecules25122760 (PMC7356218; doi:10.3390/molecules25122760)
Supplement: Supplementary file 1 [file molecules-25-02760-s001.zip › BRF212_130K.cif]

data_brf212_130k
_audit_creation_date               2019-02-01
_audit_creation_method
;
Olex2 1.2
(compiled May 18 2018 14:05:52 for OlexSys, GUI svn.r5506)
;
_shelx_SHELXL_version_number       '2014/7'
_audit_contact_author_name       'Alessandro Prescimone'
_publ_contact_author_name        'Alessandro Prescimone'
_publ_contact_author_address     'University of Basel'
_publ_contact_author_email       'alessandro.prescimone@unibas.ch'
_publ_contact_author_id_orcid    'https://orcid.org/0000-0002-3631-5210'
_chemical_compound_source          'Fabian Brunner'

_publ_section_references
;
Dolomanov, O.V., Bourhis, L.J., Gildea, R.J, Howard, J.A.K. & Puschmann, H.
 (2009), J. Appl. Cryst. 42, 339-341.

Sheldrick, G.M. (2015). Acta Cryst. A71, 3-8.

Sheldrick, G.M. (2015). Acta Cryst. C71, 3-8.
;
_chemical_name_common              ?
_chemical_name_systematic          ?
_chemical_formula_moiety           'C12 H12 N2'
_chemical_formula_sum              'C12 H12 N2'
_chemical_formula_weight           184.24
_chemical_melting_point            ?
loop_
  _atom_type_symbol
  _atom_type_description
  _atom_type_scat_dispersion_real
  _atom_type_scat_dispersion_imag
  _atom_type_scat_source
 'C' 'C' 0.0148 0.0070 'International Tables Vol C Tables 4.2.6.8 and 6.1.1.4'
 'H' 'H' 0.0000 0.0000 'International Tables Vol C Tables 4.2.6.8 and 6.1.1.4'
 'N' 'N' 0.0253 0.0136 'International Tables Vol C Tables 4.2.6.8 and 6.1.1.4'

_shelx_space_group_comment
;
The symmetry employed for this shelxl refinement is uniquely defined
by the following loop, which should always be used as a source of
symmetry information in preference to the above space-group names.
They are only intended as comments.
;
_space_group_crystal_system        'monoclinic'
_space_group_IT_number             14
_space_group_name_H-M_alt          'P 1 21/n 1'
_space_group_name_Hall             '-P 2yn'
loop_
  _space_group_symop_operation_xyz
 'x, y, z'
 '-x+1/2, y+1/2, -z+1/2'
 '-x, -y, -z'
 'x-1/2, -y-1/2, z-1/2'

_cell_length_a                     6.4300(2)
_cell_length_b                     19.2147(4)
_cell_length_c                     8.0931(2)
_cell_angle_alpha                  90
_cell_angle_beta                   91.147(2)
_cell_angle_gamma                  90
_cell_volume                       999.71(4)
_cell_formula_units_Z              4
_cell_measurement_temperature    130
_cell_measurement_reflns_used    36616
_cell_measurement_theta_min      4.00
_cell_measurement_theta_max      57.54
_shelx_estimated_absorpt_T_max     ?
_shelx_estimated_absorpt_T_min     ?
_exptl_absorpt_coefficient_mu      0.369
_exptl_absorpt_correction_type   multi-scan
_exptl_absorpt_process_details
;
STOE LANA, absorption correction by scaling of reflection intensities.
J. Koziskova, F. Hahn, J. Richter, J. Kozisek, "Comparison of different
absorption corrections on the model structure of tetrakis(\m~2~-acetato)-
diaqua-di-copper(II)", Acta Chimica Slovaca, vol. 9, no. 2, 2016, pp. 136 - 140.
;
_exptl_absorpt_correction_T_min  0.0436
_exptl_absorpt_correction_T_max  1.0000
_exptl_crystal_density_diffrn      1.224
_exptl_crystal_density_meas        ?
_exptl_crystal_density_method      ?
_exptl_crystal_F_000               392
_exptl_crystal_preparation         ?
_exptl_crystal_recrystallization_method 
 'The material was recrystallised from a mixture of cyclohexane and ethyl acetate'
_exptl_crystal_description       'plate'
_exptl_crystal_colour            'Colourless'
_exptl_crystal_size_max          0.280
_exptl_crystal_size_mid          0.190
_exptl_crystal_size_min          0.070
_exptl_transmission_factor_max     ?
_exptl_transmission_factor_min     ?
_diffrn_reflns_av_R_equivalents    0.0291
_diffrn_reflns_av_unetI/netI       0.0147
_diffrn_reflns_Laue_measured_fraction_full  1.000
_diffrn_reflns_Laue_measured_fraction_max  0.992
_diffrn_reflns_limit_h_max         8
_diffrn_reflns_limit_h_min         -7
_diffrn_reflns_limit_k_max         16
_diffrn_reflns_limit_k_min         -24
_diffrn_reflns_limit_l_max         9
_diffrn_reflns_limit_l_min         -10
_diffrn_reflns_number              13711
_diffrn_reflns_point_group_measured_fraction_full  1.000
_diffrn_reflns_point_group_measured_fraction_max  0.992
_diffrn_reflns_theta_full          53.597
_diffrn_reflns_theta_max           57.094
_diffrn_reflns_theta_min           4.003
_diffrn_ambient_temperature        130
_diffrn_detector                   Pilatus300K
_diffrn_detector_area_resol_mean   5.81
_diffrn_detector_type              'DECTRIS PILATUS 300K'
_diffrn_measured_fraction_theta_full  1.000
_diffrn_measured_fraction_theta_max  0.992
_diffrn_measurement_device         'Eulerian 4-circle diffractometer'
_diffrn_measurement_device_type    'Stoe StadiVari'
_diffrn_measurement_method         'rotation method, \w scans'
_diffrn_radiation_collimation      '1.2 0.6 mm diameter'
_diffrn_radiation_monochromator    'Graded multilayer mirror'
_diffrn_radiation_probe            x-ray
_diffrn_radiation_type             GaK\a
_diffrn_radiation_wavelength       1.34143
_diffrn_source                     'Metaljet D2'
_diffrn_source_current             3.570
_diffrn_source_power               0.250
_diffrn_source_voltage             70
_reflns_Friedel_coverage           0.000
_reflns_Friedel_fraction_full      .
_reflns_Friedel_fraction_max       .
_reflns_number_gt                  1952
_reflns_number_total               2030
_reflns_special_details
;
 Reflections were merged by SHELXL according to the crystal
 class for the calculation of statistics and refinement.
 
 _reflns_Friedel_fraction is defined as the number of unique
 Friedel pairs measured divided by the number that would be
 possible theoretically, ignoring centric projections and
 systematic absences.
;
_reflns_threshold_expression       'I > 2\s(I)'
_computing_cell_refinement         'X-Area Recipe 1.33.0.0 (STOE, 2015)'
_computing_data_collection         'X-Area Pilatus3_SV 1.31.153.0 (STOE, 2018)'
_computing_data_reduction         
 'X-Area Integrate 1.74.2.0 (STOE, 2018) X-Area LANA 1.75.3.0 (STOE, 2018)'
_computing_molecular_graphics      'Olex2 (Dolomanov et al., 2009)'
_computing_publication_material    'Olex2 (Dolomanov et al., 2009)'
_computing_structure_refinement    'ShelXL (Sheldrick, 2015)'
_computing_structure_solution      'ShelXT (Sheldrick, 2015)'
_refine_diff_density_max           0.249
_refine_diff_density_min           -0.246
_refine_diff_density_rms           0.053
_refine_ls_extinction_coef         0.013(2)
_refine_ls_extinction_expression  
 'Fc^*^=kFc[1+0.001xFc^2^\l^3^/sin(2\q)]^-1/4^'
_refine_ls_extinction_method       'SHELXL-2014/7 (Sheldrick 2014'
_refine_ls_goodness_of_fit_ref     1.190
_refine_ls_hydrogen_treatment      constr
_refine_ls_matrix_type             full
_refine_ls_number_parameters       130
_refine_ls_number_reflns           2030
_refine_ls_number_restraints       0
_refine_ls_R_factor_all            0.0574
_refine_ls_R_factor_gt             0.0564
_refine_ls_restrained_S_all        1.190
_refine_ls_shift/su_max            0.000
_refine_ls_shift/su_mean           0.000
_refine_ls_structure_factor_coef   Fsqd
_refine_ls_weighting_details      
 'w=1/[\s^2^(Fo^2^)+(0.0842P)^2^+0.4302P] where P=(Fo^2^+2Fc^2^)/3'
_refine_ls_weighting_scheme        calc
_refine_ls_wR_factor_gt            0.1686
_refine_ls_wR_factor_ref           0.1698
_refine_special_details            ?
_olex2_refinement_description
;
1. Fixed Uiso
 At 1.2 times of:
  All C(H) groups
 At 1.5 times of:
  All C(H,H,H) groups
2.a Aromatic/amide H refined with riding coordinates:
 C8(H8), C12(H12), C5(H5), C9(H9), C4(H4), C3(H3)
2.b Idealised Me refined as rotating group:
 C11(H11A,H11B,H11C), C2(H2A,H2B,H2C)
;
_atom_sites_solution_hydrogens     geom
_atom_sites_solution_primary       dual
_atom_sites_solution_secondary     ?
loop_
  _atom_site_label
  _atom_site_type_symbol
  _atom_site_fract_x
  _atom_site_fract_y
  _atom_site_fract_z
  _atom_site_U_iso_or_equiv
  _atom_site_adp_type
  _atom_site_occupancy
  _atom_site_site_symmetry_order
  _atom_site_calc_flag
  _atom_site_refinement_flags_posn
  _atom_site_refinement_flags_adp
  _atom_site_refinement_flags_occupancy
  _atom_site_disorder_assembly
  _atom_site_disorder_group
 N2 N 0.2147(2) 0.47645(7) 0.30199(17) 0.0320(4) Uani 1 1 d . . . . .
 N1 N 0.3760(2) 0.31424(7) 0.48513(17) 0.0297(4) Uani 1 1 d . . . . .
 C6 C 0.2533(2) 0.37019(8) 0.45959(19) 0.0275(4) Uani 1 1 d . . . . .
 C7 C 0.3460(2) 0.42827(8) 0.36320(19) 0.0273(4) Uani 1 1 d . . . . .
 C8 C 0.5597(2) 0.43204(8) 0.3418(2) 0.0299(4) Uani 1 1 d . . . . .
 H8 H 0.6466 0.3972 0.3834 0.036 Uiso 1 1 calc R . . . .
 C10 C 0.5096(3) 0.53917(8) 0.1951(2) 0.0321(4) Uani 1 1 d . . . . .
 C12 C 0.2981(3) 0.52953(9) 0.2194(2) 0.0337(4) Uani 1 1 d . . . . .
 H12 H 0.2075 0.5626 0.1747 0.040 Uiso 1 1 calc R . . . .
 C1 C 0.2997(3) 0.26054(8) 0.5712(2) 0.0328(4) Uani 1 1 d . . . . .
 C5 C 0.0530(2) 0.37484(9) 0.5191(2) 0.0322(4) Uani 1 1 d . . . . .
 H5 H -0.0266 0.4147 0.5014 0.039 Uiso 1 1 calc R . . . .
 C9 C 0.6419(3) 0.48813(9) 0.2580(2) 0.0323(4) Uani 1 1 d . . . . .
 H9 H 0.7847 0.4916 0.2440 0.039 Uiso 1 1 calc R . . . .
 C4 C -0.0257(3) 0.31882(9) 0.6056(2) 0.0369(4) Uani 1 1 d . . . . .
 H4 H -0.1604 0.3201 0.6452 0.044 Uiso 1 1 calc R . . . .
 C3 C 0.0988(3) 0.26086(9) 0.6323(2) 0.0361(4) Uani 1 1 d . . . . .
 H3 H 0.0488 0.2227 0.6901 0.043 Uiso 1 1 calc R . . . .
 C11 C 0.5892(3) 0.60183(9) 0.1046(2) 0.0399(5) Uani 1 1 d . . . . .
 H11A H 0.6587 0.5871 0.0068 0.060 Uiso 1 1 calc GR . . . .
 H11B H 0.6850 0.6269 0.1750 0.060 Uiso 1 1 calc GR . . . .
 H11C H 0.4746 0.6315 0.0744 0.060 Uiso 1 1 calc GR . . . .
 C2 C 0.4451(3) 0.20026(10) 0.5998(3) 0.0447(5) Uani 1 1 d . . . . .
 H2A H 0.5304 0.1942 0.5049 0.067 Uiso 1 1 calc GR . . . .
 H2B H 0.3657 0.1587 0.6176 0.067 Uiso 1 1 calc GR . . . .
 H2C H 0.5319 0.2094 0.6953 0.067 Uiso 1 1 calc GR . . . .

loop_
  _atom_site_aniso_label
  _atom_site_aniso_U_11
  _atom_site_aniso_U_22
  _atom_site_aniso_U_33
  _atom_site_aniso_U_23
  _atom_site_aniso_U_13
  _atom_site_aniso_U_12
 N2 0.0319(7) 0.0318(7) 0.0322(7) 0.0009(5) 0.0002(5) 0.0039(5)
 N1 0.0320(7) 0.0290(7) 0.0282(7) -0.0003(5) 0.0005(5) 0.0011(5)
 C6 0.0282(8) 0.0290(8) 0.0253(7) -0.0021(6) -0.0018(6) -0.0004(6)
 C7 0.0292(8) 0.0276(8) 0.0253(7) -0.0027(6) -0.0005(6) 0.0010(6)
 C8 0.0292(8) 0.0303(8) 0.0300(8) -0.0009(6) -0.0017(6) 0.0007(6)
 C10 0.0399(9) 0.0307(8) 0.0257(8) -0.0030(6) -0.0007(6) -0.0038(6)
 C12 0.0387(9) 0.0299(8) 0.0325(9) 0.0018(6) -0.0001(7) 0.0042(6)
 C1 0.0390(9) 0.0296(8) 0.0297(8) -0.0012(6) 0.0001(6) -0.0008(6)
 C5 0.0295(8) 0.0324(8) 0.0348(9) -0.0025(6) 0.0001(6) 0.0004(6)
 C9 0.0300(8) 0.0352(9) 0.0317(8) -0.0021(6) -0.0002(6) -0.0042(6)
 C4 0.0322(9) 0.0392(9) 0.0394(9) -0.0043(7) 0.0061(7) -0.0049(7)
 C3 0.0421(9) 0.0313(8) 0.0350(9) -0.0011(7) 0.0047(7) -0.0069(7)
 C11 0.0511(11) 0.0341(9) 0.0345(9) 0.0018(7) -0.0009(8) -0.0082(8)
 C2 0.0491(11) 0.0364(9) 0.0487(11) 0.0106(8) 0.0057(8) 0.0056(8)

_geom_special_details
;
 All esds (except the esd in the dihedral angle between two l.s. planes)
 are estimated using the full covariance matrix.  The cell esds are taken
 into account individually in the estimation of esds in distances, angles
 and torsion angles; correlations between esds in cell parameters are only
 used when they are defined by crystal symmetry.  An approximate (isotropic)
 treatment of cell esds is used for estimating esds involving l.s. planes.
;
loop_
  _geom_bond_atom_site_label_1
  _geom_bond_atom_site_label_2
  _geom_bond_distance
  _geom_bond_site_symmetry_2
  _geom_bond_publ_flag
 N2 C7 1.341(2) . ?
 N2 C12 1.338(2) . ?
 N1 C6 1.347(2) . ?
 N1 C1 1.343(2) . ?
 C6 C7 1.493(2) . ?
 C6 C5 1.387(2) . ?
 C7 C8 1.391(2) . ?
 C8 C9 1.384(2) . ?
 C10 C12 1.390(2) . ?
 C10 C9 1.388(2) . ?
 C10 C11 1.504(2) . ?
 C1 C3 1.393(2) . ?
 C1 C2 1.503(2) . ?
 C5 C4 1.385(2) . ?
 C4 C3 1.386(3) . ?

loop_
  _geom_angle_atom_site_label_1
  _geom_angle_atom_site_label_2
  _geom_angle_atom_site_label_3
  _geom_angle
  _geom_angle_site_symmetry_1
  _geom_angle_site_symmetry_3
  _geom_angle_publ_flag
 C12 N2 C7 117.09(14) . . ?
 C1 N1 C6 118.30(14) . . ?
 N1 C6 C7 116.00(14) . . ?
 N1 C6 C5 122.89(15) . . ?
 C5 C6 C7 121.10(14) . . ?
 N2 C7 C6 117.02(14) . . ?
 N2 C7 C8 122.30(15) . . ?
 C8 C7 C6 120.66(14) . . ?
 C9 C8 C7 119.31(15) . . ?
 C12 C10 C11 121.26(16) . . ?
 C9 C10 C12 116.59(15) . . ?
 C9 C10 C11 122.14(16) . . ?
 N2 C12 C10 125.13(15) . . ?
 N1 C1 C3 122.10(15) . . ?
 N1 C1 C2 116.08(15) . . ?
 C3 C1 C2 121.81(16) . . ?
 C4 C5 C6 118.47(15) . . ?
 C8 C9 C10 119.54(15) . . ?
 C5 C4 C3 119.17(15) . . ?
 C4 C3 C1 119.04(16) . . ?

_shelx_res_file
;
    brf212_130k.res created by SHELXL-2014/7

TITL brf212_130k_a.res in P2(1)/n
REM Old TITL BRF212_130K in P21/c #14
REM SHELXT solution in P2(1)/n
REM R1 0.141, Rweak 0.004, Alpha 0.022, Orientation as input
REM Formula found by SHELXT: C12 N2
CELL 1.34143 6.43 19.2147 8.0931 90 91.147 90
ZERR 4 0.0002 0.0004 0.0002 0 0.002 0
LATT 1
SYMM 0.5-X,0.5+Y,0.5-Z
SFAC C H N
DISP C 0.0148 0.007 57.7477
DISP N 0.0253 0.0136 110.5121
UNIT 48 48 8

L.S. 10
PLAN  5
list 4
fmap 2 53
acta
REM <olex2.extras>
REM <HklSrc "%./BRF212_130K.hkl">
REM </olex2.extras>

WGHT    0.084200    0.430200
EXTI    0.012889
FVAR       0.93716
N2    3    0.214691    0.476453    0.301992    11.00000    0.03188    0.03179 =
         0.03222    0.00086    0.00024    0.00385
N1    3    0.375965    0.314243    0.485134    11.00000    0.03200    0.02901 =
         0.02816   -0.00030    0.00045    0.00115
C6    1    0.253316    0.370191    0.459594    11.00000    0.02816    0.02903 =
         0.02533   -0.00214   -0.00182   -0.00040
C7    1    0.345980    0.428270    0.363205    11.00000    0.02915    0.02756 =
         0.02526   -0.00272   -0.00053    0.00097
C8    1    0.559735    0.432042    0.341796    11.00000    0.02916    0.03033 =
         0.03004   -0.00095   -0.00169    0.00067
AFIX  43
H8    2    0.646577    0.397227    0.383353    11.00000   -1.20000
AFIX   0
C10   1    0.509565    0.539172    0.195050    11.00000    0.03994    0.03069 =
         0.02574   -0.00297   -0.00069   -0.00376
C12   1    0.298084    0.529529    0.219371    11.00000    0.03867    0.02988 =
         0.03249    0.00185   -0.00008    0.00425
AFIX  43
H12   2    0.207489    0.562576    0.174684    11.00000   -1.20000
AFIX   0
C1    1    0.299732    0.260542    0.571227    11.00000    0.03899    0.02964 =
         0.02968   -0.00123    0.00008   -0.00085
C5    1    0.052982    0.374840    0.519122    11.00000    0.02947    0.03236 =
         0.03482   -0.00247    0.00011    0.00037
AFIX  43
H5    2   -0.026638    0.414651    0.501392    11.00000   -1.20000
AFIX   0
C9    1    0.641859    0.488131    0.258022    11.00000    0.02999    0.03525 =
         0.03169   -0.00208   -0.00018   -0.00425
AFIX  43
H9    2    0.784679    0.491620    0.243990    11.00000   -1.20000
AFIX   0
C4    1   -0.025731    0.318822    0.605577    11.00000    0.03220    0.03917 =
         0.03943   -0.00428    0.00608   -0.00491
AFIX  43
H4    2   -0.160435    0.320088    0.645228    11.00000   -1.20000
AFIX   0
C3    1    0.098753    0.260861    0.632256    11.00000    0.04206    0.03135 =
         0.03496   -0.00111    0.00467   -0.00693
AFIX  43
H3    2    0.048803    0.222732    0.690075    11.00000   -1.20000
AFIX   0
C11   1    0.589168    0.601826    0.104626    11.00000    0.05107    0.03412 =
         0.03449    0.00179   -0.00093   -0.00823
AFIX 137
H11A  2    0.658717    0.587054    0.006796    11.00000   -1.50000
H11B  2    0.685009    0.626872    0.174989    11.00000   -1.50000
H11C  2    0.474590    0.631545    0.074375    11.00000   -1.50000
AFIX   0
C2    1    0.445057    0.200262    0.599846    11.00000    0.04909    0.03638 =
         0.04872    0.01059    0.00568    0.00558
AFIX 137
H2A   2    0.530397    0.194223    0.504924    11.00000   -1.50000
H2B   2    0.365699    0.158704    0.617606    11.00000   -1.50000
H2C   2    0.531884    0.209361    0.695286    11.00000   -1.50000
AFIX   0
HKLF 4

REM  brf212_130k_a.res in P2(1)/n
REM R1 =  0.0564 for    1952 Fo > 4sig(Fo)  and  0.0574 for all    2030 data
REM    130 parameters refined using      0 restraints

END

WGHT      0.0842      0.4302

REM Highest difference peak  0.249,  deepest hole -0.246,  1-sigma level  0.053
Q1    1   0.6229  0.2059  0.5998  11.00000  0.05    0.25
Q2    1   0.7755  0.5984  0.1051  11.00000  0.05    0.24
Q3    1   0.4254  0.4801  0.2811  11.00000  0.05    0.21
Q4    1   0.8511  0.4779  0.2496  11.00000  0.05    0.20
Q5    1   0.0253  0.4832  0.3056  11.00000  0.05    0.20
;
_shelx_res_checksum                24697
_shelx_hkl_file
;
  -2   0  -7    0.30    1.70
  -4  -4  -8    1.35    1.18
  -2 -10  -8    1.06    1.13
  -6   0  -6    7.34    1.24
  -3  -4  -8   18.88    1.47
  -2  -8  -8   46.99    1.80
  -5  -1  -7   51.57    1.79
  -4  -5  -8   13.31    1.35
  -4  -6  -8   15.89    1.11
  -3   0  -7    1.94    1.40
  -1  -4  -7    4.41    1.59
  -4   4  -5    9.35    1.66
  -3 -10  -8   37.29    1.62
  -5  -2  -7   84.57    1.93
  -4  -8  -8    2.19    0.80
  -3  -8  -8    0.11    0.95
   0  -6  -6   17.97    1.39
  -5   1  -6   38.18    1.61
  -4  -1  -7   13.93    1.39
  -3  -1  -7   55.36    1.78
  -2  -2  -7    2.62    1.66
  -2   3  -5    0.93    1.23
  -1  -6  -7   21.12    1.58
   0  -7  -6  584.31    3.36
  -2   1  -6   14.71    1.69
  -1 -10  -7   34.77    1.63
  -1  -7  -7   97.73    1.83
   0  -2  -5    2.34    0.84
  -2   4  -4   10.05    1.00
  -1  -8  -7  448.16    3.32
  -1   1  -5    9.49    1.15
  -6  -2  -6    2.16    1.02
  -4  -2  -7    8.61    1.27
  -3  -2  -7    0.05    1.29
  -5  -4  -7   34.99    1.28
  -5   0  -6   -0.02    1.50
  -1  -2  -6   10.52    1.35
   0  -3  -5  155.22    1.75
  -3   1  -6  265.15    2.74
  -2   0  -6  274.66    2.61
  -5   2  -5  237.04    2.66
  -4  -3  -7   45.44    1.65
  -3  -3  -7    0.66    1.24
  -4   4  -4    4.82    1.20
  -5  -6  -7   17.97    1.06
  -4  -4  -7   21.47    1.43
  -2 -12  -7   31.48    1.38
   0  -4  -5  363.43    2.17
  -5  -7  -7   41.55    1.26
  -5  -1  -6   34.43    1.55
  -3  -4  -7    0.54    1.20
  -3   0  -6   -0.01    1.50
  -2  -1  -6   14.15    1.49
  -5  -8  -7    0.78    0.74
  -2 -11  -7  114.86    1.84
  -2  -7  -7   55.54    1.67
  -4   2  -5   12.51    1.50
  -3  -5  -7   22.92    1.37
  -2 -10  -7  392.57    2.94
  -2  -9  -7    2.13    1.32
  -2  -8  -7   20.48    1.35
  -1  -4  -6    1.75    1.17
  -6  -5  -6    0.93    0.61
  -6  -1  -5  250.68    2.42
  -5   1  -5    0.41    1.14
   0  -5  -5   12.53    0.86
  -5  -2  -6    0.15    1.07
  -3  -6  -7    2.54    1.29
  -1  -1  -5    9.28    1.02
  -4  -1  -6    7.21    1.44
  -3 -12  -7    5.43    1.01
  -3  -1  -6  230.71    2.43
  -2  -2  -6  134.88    1.92
  -1  -5  -6   27.29    1.24
  -6  -6  -6    1.42    0.62
  -3  -7  -7   21.54    1.17
  -4 -10  -7   22.27    1.00
  -4  -9  -7    1.51    0.75
  -4   3  -4   10.81    1.20
  -3 -11  -7   22.47    1.12
  -3 -10  -7  107.39    1.79
  -3  -9  -7  121.50    1.90
  -1  -6  -6   18.45    1.15
  -6  -2  -5   68.09    1.44
  -4   1  -5  137.78    1.84
  -2  -3  -6  127.28    1.80
  -4  -2  -6   14.15    1.33
  -3  -2  -6   23.88    1.47
  -3   1  -5   65.24    1.41
  -2   0  -5    0.03    0.86
  -1  -2  -5   68.15    1.20
  -3  -3  -6    8.45    1.37
  -3   0  -5   -0.56    0.97
  -2  -5  -6    7.69    1.11
  -5  -6  -6    9.59    0.86
  -5   1  -4   -0.25    1.05
  -4  -4  -6   10.38    0.98
  -3  -4  -6    3.31    1.28
  -3 -15  -6    1.54    0.67
  -2 -13  -6    8.07    1.11
  -6  -5  -5    8.24    0.94
  -5 -11  -6    9.22    0.73
  -5  -8  -6    0.09    0.62
  -4  -5  -6    2.51    0.93
  -5 -10  -6   43.65    1.03
  -5  -9  -6    2.46    0.64
  -3  -5  -6    2.95    1.11
  -2 -12  -6   24.80    1.02
  -4 -14  -6    3.30    0.71
  -4  -6  -6    7.55    1.10
  -3 -14  -6    1.64    0.74
  -2  -2  -5   11.86    0.80
  -6  -6  -5    1.74    0.64
  -3  -6  -6    4.95    1.07
  -5   0  -4   -0.61    1.01
  -4  -7  -6    1.28    0.89
  -3 -13  -6    7.05    0.83
  -4  -2  -5   12.48    1.03
  -3  -8  -6    1.28    1.12
  -3 -11  -6    0.97    0.87
  -2  -3  -5    0.55    0.70
  -1  -6  -5    0.56    0.57
  -6 -10  -5    2.44    0.54
  -6  -3  -4    7.92    0.76
  -4   2  -3   16.20    0.72
  -5  -1  -4    0.26    0.77
  -6  -1  -3    6.82    0.85
  -6  -4  -4   50.19    1.06
  -5 -14  -5    0.27    0.40
  -4  -4  -5    9.36    0.98
  -5  -7  -5   34.68    1.08
  -5  -2  -4   70.33    1.25
  -4 -16  -5    8.23    0.62
  -5 -13  -5    0.76    0.48
  -7  -7  -3   16.64    0.69
  -6  -2  -3    3.92    0.88
  -5  -8  -5    5.17    0.65
  -4  -5  -5    4.07    0.87
  -6  -6  -4    2.57    0.74
  -5 -10  -5   10.75    0.61
  -5  -9  -5   28.48    0.82
  -4 -15  -5    0.88    0.57
  -3  -1  -4   79.36    0.92
  -2 -14  -5   35.24    0.99
  -7  -8  -3    1.09    0.44
  -5  -3  -4   45.47    0.98
  -3 -15  -5   93.37    1.17
  -2 -13  -5  192.36    1.54
  -2  -2  -4  238.03    1.27
  -3  -6  -5   81.75    1.16
  -2  -8  -5   50.90    0.93
  -3 -14  -5    5.31    0.72
  -2  -9  -5  190.12    1.47
  -6 -12  -4   13.45    0.58
  -6  -9  -4   33.91    0.80
  -3  -7  -5  210.08    1.56
  -2 -11  -5    0.49    0.61
  -2 -10  -5   19.67    0.74
  -6 -11  -4   31.93    0.76
  -6 -10  -4    6.10    0.49
  -5  -4  -4   27.53    0.88
  -4 -12  -5   15.84    0.63
  -4  -9  -5   44.32    0.90
  -3  -2  -4   31.67    0.70
  -4 -11  -5   38.01    0.85
  -3  -8  -5   80.82    1.15
  -3 -11  -5   59.90    1.12
  -2  -3  -4  938.37    2.28
  -6  -4  -3  269.53    1.70
  -4  -3  -4   10.98    0.81
  -4   0  -3   -0.14    0.46
  -3 -18  -4   36.76    0.76
  -5 -15  -4   39.66    0.73
  -4 -17  -4   38.52    0.76
  -3  -3  -4   45.60    0.73
  -7  -7  -2    0.10    0.43
  -5  -6  -4    3.33    0.67
  -2  -4  -4   10.28    0.53
  -1  -7  -4    0.99    0.44
  -6  -2  -2   46.41    0.87
  -5 -14  -4    3.39    0.41
  -5  -2  -3  337.17    1.65
  -4  -4  -4    5.03    0.65
  -5  -7  -4   31.28    0.78
  -3 -17  -4    7.90    0.49
  -1  -8  -4   17.90    0.51
  -7  -9  -2    0.58    0.38
  -6  -6  -3   21.16    0.70
  -5 -13  -4   29.99    0.65
  -5  -8  -4    3.75    0.63
  -5   0  -2   -0.57    0.46
  -5  -9  -4    1.34    0.65
  -2  -5  -4  133.10    0.92
  -1 -11  -4   19.23    0.58
  -1 -10  -4   41.65    0.64
  -1  -9  -4    0.62    0.39
  -4   1  -2   69.98    0.63
  -6 -13  -3   19.54    0.54
  -3  -5  -4  238.61    1.26
  -6 -11  -3   -0.04    0.36
  -6 -10  -3    2.45    0.41
  -3 -15  -4   17.82    0.64
  -2  -7  -4   10.48    0.43
  -4 -13  -4   26.03    0.65
  -2 -13  -4  193.36    1.17
  -7  -7  -1    0.17    0.37
  -5 -16  -3   13.58    0.45
  -4 -18  -3   13.57    0.47
  -4 -11  -4  137.34    1.12
  -5  -5  -3    0.17    0.51
  -7  -8  -1    3.87    0.38
  -3 -12  -4    1.79    0.50
  -3  -9  -4   12.40    0.55
  -7 -11  -1   42.81    0.68
  -5  -2  -2   11.14    0.49
  -3 -18  -3   24.12    0.53
  -5 -14  -3    7.04    0.47
  -4 -17  -3    1.03    0.33
  -6 -14  -2    0.90    0.26
  -6  -7  -2    9.34    0.49
  -6  -3  -1    2.47    0.46
  -5  -8  -3    0.23    0.47
  -5 -10  -3    5.65    0.44
  -5 -17  -2   16.32    0.44
  -7  -8   0    0.10    0.25
  -3 -16  -3    0.01    0.40
  -1 -13  -3   45.26    0.54
  -5 -16  -2    1.04    0.24
  -4  -2  -2    0.48    0.27
  -1 -12  -3    0.62    0.28
  -6  -5  -1   -0.48    0.36
  -1 -11  -3   55.75    0.49
  -3 -19  -2    0.11    0.25
  -4 -10  -3    1.31    0.45
  -6 -14  -1  153.94    0.99
  -2  -7  -3    0.75    0.25
  -5 -18  -1    3.58    0.26
  -4 -20  -1    1.56    0.23
  -2 -12  -3   17.25    0.37
  -7 -10   1    7.44    0.30
  -3 -11  -3   22.69    0.45
  -3 -10  -3    0.28    0.32
  -2 -10  -3    3.57    0.24
  -5 -11  -2    7.85    0.35
  -5  -9  -2   -0.22    0.35
  -5 -17  -1    0.36    0.20
  -5  -3  -1    1.05    0.28
  -4 -19  -1    0.04    0.26
  -4 -15  -2    3.71    0.41
  -3 -20  -1    5.83    0.27
  -2 -17  -2    2.57    0.32
  -6 -15   0    4.47    0.24
  -4  -5  -2    0.36    0.30
  -6  -5   0    0.14    0.26
  -5  -4  -1   21.15    0.38
  -4 -14  -2  497.28    1.54
  -6 -14   0    1.26    0.20
  -4  -6  -2    3.06    0.28
  -3 -16  -2    5.48    0.30
  -6  -6   0   15.77    0.35
  -5 -15  -1    1.46    0.24
  -4 -18  -1   39.78    0.47
  -4 -13  -2   46.40    0.53
  -2 -16  -2   18.94    0.40
  -6 -13   0    4.30    0.24
  -4  -7  -2    6.75    0.33
  -3 -19  -1    3.25    0.28
  -6  -7   0   36.18    0.45
  -5  -5  -1  645.92    1.48
  -4 -12  -2   10.78    0.39
  -3 -15  -2   40.53    0.51
  -6  -8   0   82.46    0.64
  -4 -11  -2   68.38    0.60
  -4  -8  -2   59.61    0.52
  -4  -2  -1  461.51    1.01
  -6 -10   0    2.60    0.30
  -6  -9   0    0.89    0.26
  -5  -6  -1  782.52    1.66
  -4 -10  -2    5.81    0.33
  -4  -9  -2    4.18    0.31
  -2 -15  -2    0.43    0.25
  -1 -14  -2   71.14    0.47
  -5 -13  -1  132.05    0.86
  -5  -2   0    1.60    0.27
  -3 -14  -2   12.64    0.34
  -3  -5  -2   58.42    0.40
  -6 -15   1    0.37    0.18
  -5 -17   0   -0.02    0.15
  -5  -7  -1  265.20    1.00
  -5 -11  -1   43.07    0.50
  -3 -18  -1   13.09    0.33
  -1 -13  -2   86.73    0.46
  -5 -10  -1   63.24    0.57
  -5  -9  -1   11.10    0.35
  -3  -6  -2  194.75    0.67
  -2 -14  -2    9.42    0.28
  -6 -14   1    6.65    0.23
  -4 -16  -1    0.38    0.23
  -4  -3  -1    0.41    0.18
  -6  -5   1   13.20    0.32
  -5 -16   0    1.98    0.18
  -3 -12  -2  139.37    0.69
  -2 -18  -1   17.98    0.34
  -1 -12  -2   47.01    0.34
  -5  -3   0   23.17    0.31
  -3 -20   0   17.97    0.31
  -3 -11  -2   81.69    0.53
  -2 -13  -2  192.48    0.72
  -6  -6   1    7.13    0.29
  -5 -18   1    3.35    0.18
  -4 -15  -1    1.91    0.24
  -3 -17  -1    7.28    0.29
  -3 -10  -2    1.54    0.21
  -3  -9  -2   25.11    0.31
  -5 -15   0   38.15    0.43
  -2 -12  -2   25.02    0.29
  -6 -15   2    7.05    0.21
  -6  -7   1   -0.08    0.19
  -4 -20   1    0.31    0.13
  -6 -11   1   99.42    0.63
  -6  -8   1   21.01    0.34
  -4 -14  -1   13.72    0.32
  -2 -11  -2   28.30    0.29
  -6 -10   1    2.49    0.24
  -6  -9   1   12.06    0.29
  -5 -14   0    6.77    0.26
  -2 -17  -1   39.71    0.41
  -2 -10  -2  162.08    0.59
  -5 -17   1    7.64    0.22
  -3 -19   0   61.64    0.49
  -3 -16  -1  114.52    0.64
  -4 -13  -1    0.10    0.25
  -5 -13   0   12.75    0.30
  -5  -5   0    1.97    0.18
  -4 -17   0   36.80    0.40
  -6 -13   2   10.33    0.25
  -4 -12  -1   13.17    0.33
  -5 -18   2   24.36    0.32
  -4 -19   1    0.35    0.13
  -4 -11  -1    6.16    0.27
  -3 -15  -1   22.22    0.33
  -5 -11   0  312.38    1.04
  -4 -10  -1    5.81    0.26
  -2 -19   0   42.22    0.40
  -6 -12   2    1.02    0.17
  -6  -6   2    0.16    0.21
  -5 -10   0  683.33    1.49
  -4  -9  -1    7.66    0.25
  -6 -14   3    0.45    0.11
  -6 -11   2    0.97    0.21
  -5  -9   0    3.04    0.26
  -4 -20   2    0.83    0.11
  -3 -20   1   33.76    0.36
  -3 -18   0   23.10    0.33
  -6 -10   2    0.79    0.21
  -6  -7   2   -0.03    0.21
  -5 -15   1    5.56    0.21
  -6  -9   2    6.86    0.22
  -6  -8   2    0.62    0.16
  -5 -17   2    0.29    0.12
  -6 -13   3    4.96    0.19
  -3 -13  -1    6.48    0.23
  -3 -17   0   33.57    0.37
  -6 -12   3   12.94    0.26
  -2 -20   1   41.38    0.38
  -2 -14  -1   15.00    0.25
  -5 -16   2    8.61    0.21
  -5 -13   1    5.18    0.22
  -4 -14   0   10.94    0.26
  -3 -19   1    3.86    0.22
  -6 -11   3   26.09    0.33
  -4 -17   1    0.21    0.14
  -6 -10   3    0.11    0.16
  -6  -7   3    8.10    0.24
  -5 -17   3   43.42    0.38
  -3  -6  -1    1.29    0.13
  -6 -12   4    1.53    0.14
  -6  -9   3    1.15    0.17
  -6  -8   3    5.29    0.20
  -3  -9  -1    4.76    0.18
  -2 -13  -1    3.79    0.16
  -5 -15   2    1.45    0.15
  -6 -11   4   15.34    0.26
  -5  -6   1    1.47    0.18
  -4 -16   1    1.12    0.20
  -3 -20   2   45.80    0.39
  -5 -10   1    1.56    0.22
  -5  -7   1    1.44    0.22
  -5 -16   3   27.72    0.31
  -5 -14   2    0.20    0.18
  -4 -19   3   11.14    0.22
  -6  -9   4    9.86    0.21
  -4 -15   1    0.83    0.16
  -4  -9   0    0.17    0.17
  -4 -17   2    3.94    0.19
  -5 -16   4    3.00    0.15
  -3 -19   2   97.79    0.55
  -3 -14   0    1.78    0.19
  -2 -20   2    7.64    0.20
  -3 -20   3    6.40    0.19
  -4 -18   3    4.10    0.16
  -4 -14   1    2.52    0.18
  -5 -14   3   25.45    0.32
  -3 -13   0    0.45    0.18
  -5 -15   4   10.14    0.23
  -5 -11   2    0.30    0.19
  -4 -16   2    2.32    0.21
  -4 -13   1    0.12    0.17
  -3 -18   2   17.71    0.31
  -4 -18   4    7.33    0.18
  -4 -17   3    0.58    0.13
  -2 -14   0    2.98    0.19
  -5 -14   4    7.61    0.20
  -3 -19   3    4.78    0.18
  -2 -19   2    1.78    0.15
  -2 -17   1    9.48    0.23
  -3 -15   1   10.08    0.25
  -3 -10   0    0.35    0.14
  -5 -13   4    6.77    0.21
  -4 -17   4    0.64    0.14
  -4 -16   3   -0.16    0.14
  -4 -14   2    3.03    0.18
  -4  -4   1    2.39    0.14
  -2 -13   0    0.97    0.14
  -1 -14   0    0.05    0.13
  -1 -17   1    2.26    0.19
  -5 -10   3   93.64    0.56
  -5  -4   3    2.95    0.19
  -4  -5   1    0.66    0.12
  -3 -19   4    0.56    0.12
  -5  -9   3    4.78    0.24
  -4 -17   5    8.21    0.19
  -3 -18   3    4.35    0.19
  -2 -18   2    0.19    0.17
  -2 -16   1    6.38    0.20
  -5  -8   3    0.09    0.20
  -5  -5   3    1.72    0.19
  -4 -13   2   13.23    0.27
  -2 -20   4    5.21    0.18
  -2 -12   0   26.69    0.25
  -5  -7   3  351.35    0.97
  -5  -6   3   23.27    0.29
  -4 -15   3    0.18    0.17
  -3 -16   2   25.42    0.37
  -5 -12   5   14.41    0.25
  -5 -12   6    9.26    0.19
  -2 -19   3    0.18    0.15
  -4 -12   2    1.08    0.28
  -3 -13   1   68.32    0.45
  -5 -11   6    8.25    0.22
  -4 -16   5    0.80    0.12
  -4 -14   3   -0.14    0.21
  -1 -18   2   15.55    0.27
  -1 -16   1    8.71    0.21
  -5  -9   4   19.65    0.30
  -4 -11   2  166.79    0.73
  -3 -12   1    0.12    0.22
  -2 -17   2  220.32    0.81
  -4 -15   4   12.54    0.25
  -3 -15   2    4.26    0.24
  -1 -12   0   32.33    0.26
  -5 -10   5    1.41    0.17
  -5 -10   6   -0.15    0.15
  -5  -8   4   -0.20    0.16
  -3 -18   5    0.25    0.13
  -1 -19   3    3.74    0.21
  -4 -10   2   17.87    0.30
  -2 -19   4   18.95    0.30
  -4 -13   3    8.82    0.25
  -3 -11   1    0.63    0.18
  -2 -18   3   37.55    0.38
  -2 -14   1    3.35    0.19
  -4 -15   6    1.38    0.14
  -3 -16   3   26.33    0.35
  -5  -8   6    1.68    0.17
  -4 -14   4   44.01    0.45
  -4  -3   2    4.75    0.16
  -3 -17   4    0.68    0.15
  -1 -15   1   51.25    0.37
  -5  -7   5    0.68    0.18
  -5  -7   6    2.92    0.21
  -5  -6   5    1.73    0.23
  -3 -10   1    0.80    0.16
  -2 -19   5   12.24    0.25
  -2 -16   2    9.51    0.26
  -1 -17   2   26.05    0.32
  -2 -13   1    1.05    0.23
  -4 -14   6    5.34    0.19
  -3 -17   6    1.69    0.15
  -3 -13   2    0.03    0.27
  -3 -15   3    7.04    0.26
  -1 -19   4    9.69    0.24
  -1 -18   3    1.24    0.24
  -3 -16   4    8.46    0.27
  -1 -14   1   62.83    0.41
  -4 -13   5  149.30    0.81
  -5  -7  -2   23.68    0.44
  -4  -8  -4   38.34    0.57
  -3  -9  -5   25.03    0.48
  -3  -3  -3  105.60    0.58
  -5 -17  -3    2.38    0.22
  -2  -7  -5   39.37    0.47
  -3 -10  -5    2.00    0.43
  -2  -4  -4    9.31    0.27
  -5 -15  -3    0.19    0.20
  -5  -8  -2   10.40    0.37
  -4  -6  -3   32.73    0.45
  -3 -17  -5   17.77    0.41
  -4 -18  -4   27.35    0.42
  -3  -6  -4   14.54    0.34
  -2  -8  -5   51.68    0.48
  -3 -16  -5    2.92    0.24
  -5  -9  -2    0.08    0.28
  -5  -7  -1  265.72    0.97
  -4 -17  -4   32.19    0.44
  -3 -15  -5   94.44    0.69
  -3  -4  -3  405.82    1.00
  -2 -19  -5    2.37    0.20
  -2  -9  -5  189.61    0.83
  -4 -16  -4   83.51    0.65
  -4 -13  -4   22.78    0.44
  -4  -7  -3    6.22    0.32
  -3  -7  -4    0.17    0.26
  -5 -10  -2    0.17    0.27
  -4 -14  -4    7.22    0.29
  -5  -8  -1    2.61    0.29
  -5  -7   0    5.77    0.27
  -2 -18  -5   53.61    0.53
  -2 -10  -5   19.39    0.39
  -4  -4  -1   77.31    0.45
  -5 -12  -2   70.95    0.62
  -4  -8  -3   15.52    0.35
  -1  -9  -5   87.71    0.51
  -3  -5  -3    0.84    0.20
  -2 -17  -5    8.08    0.29
  -5  -9  -1   10.76    0.29
  -2 -16  -5   77.78    0.58
  -2 -12  -5  109.72    0.65
  -5  -8   0   81.58    0.52
  -4 -19  -3    4.33    0.20
  -4  -9  -3    1.94    0.28
  -2 -15  -5   10.24    0.29
  -2 -14  -5   41.57    0.44
  -2 -13  -5  208.26    0.86
  -1 -10  -5   92.76    0.55
  -5 -10  -1   63.86    0.50
  -4 -18  -3   10.77    0.25
  -4 -10  -3    1.29    0.28
  -4  -5  -1  459.19    0.96
  -1 -17  -5    6.37    0.26
  -1 -11  -5  825.17    1.44
  -5 -17  -1    0.35    0.19
  -5 -11  -1   45.05    0.42
  -5  -9   0    3.89    0.24
  -3 -10  -4   47.44    0.45
  -3  -6  -3  276.97    0.79
  -4 -11  -3   12.86    0.31
  -1 -16  -5   24.66    0.36
  -1 -12  -5  565.94    1.23
  -5 -16  -1    0.37    0.17
  -5 -12  -1    4.36    0.23
  -4 -16  -3    5.36    0.25
  -4 -12  -3   25.08    0.36
  -3 -17  -4    8.47    0.23
  -3 -11  -4   57.52    0.49
  -1 -15  -5   -0.08    0.23
  -1 -13  -5   64.80    0.46
  -5 -13  -1  152.28    0.75
  -4 -15  -3    8.09    0.26
  -4 -13  -3   30.53    0.38
  -3 -16  -4    3.59    0.20
  -5 -18   0   -0.24    0.13
  -4 -14  -3    4.88    0.24
  -3 -15  -4   15.69    0.29
  -3 -14  -4   57.47    0.49
  -3 -13  -4    0.76    0.24
  -4 -20  -2    4.56    0.18
  -3  -7  -3  175.41    0.62
  -2 -20  -4   11.00    0.25
  -5 -17   0   -0.15    0.16
  -4  -6  -1   80.43    0.41
  -4  -5   0   23.29    0.22
  -5 -16   0    1.99    0.20
  -5 -12   0   15.41    0.29
  -4 -19  -2    7.68    0.21
  -2 -19  -4    7.25    0.22
  -5 -14   0    6.89    0.23
  -5 -13   0   14.04    0.26
  -4  -9  -2    4.27    0.22
  -3 -20  -3   35.81    0.37
  -5 -16   1    7.75    0.22
  -4 -18  -2   11.67    0.23
  -4 -10  -2    5.96    0.22
  -4  -7  -1   12.85    0.22
  -2 -18  -4   13.66    0.27
  -5 -15   1    6.02    0.21
  -1 -20  -4    2.74    0.16
  -4 -17  -2   16.37    0.27
  -3 -19  -3   32.24    0.36
  -3  -9  -3    0.06    0.17
  -1  -8  -4   19.92    0.22
  -4 -20  -1    1.15    0.13
  -4 -16  -2  171.26    0.78
  -4 -15  -2    3.10    0.21
  -3 -18  -3   24.16    0.32
  -2 -16  -4    6.12    0.22
  -2 -12  -4    9.39    0.26
  -2  -6  -3  976.43    1.14
  -4 -14  -2  490.67    1.19
  -4 -13  -2   48.29    0.41
  -3 -10  -3    0.41    0.18
  -2 -15  -4    0.09    0.18
  -2 -13  -4  193.86    0.70
  -1 -19  -4   24.09    0.29
  -3 -17  -3    6.17    0.23
  -1  -9  -4    0.80    0.14
  -4 -19  -1    0.20    0.14
  -3 -11  -3   22.09    0.29
  -2 -21  -3   -0.02    0.11
  -3 -21  -2   42.28    0.38
  -3 -16  -3    0.39    0.16
  -3 -12  -3   26.78    0.31
  -1 -18  -4    0.23    0.15
  -4  -7   0  619.51    0.96
  -3 -15  -3   21.42    0.28
  -3 -14  -3   43.79    0.37
  -3 -13  -3   91.34    0.51
  -2  -7  -3    0.92    0.12
  -4 -18  -1   33.72    0.34
  -1 -10  -4   41.22    0.28
  -4 -10  -1    5.86    0.21
  -2 -20  -3    5.04    0.17
  -1 -22  -3    9.08    0.19
  -1 -17  -4    1.24    0.13
  -4 -20   0   19.75    0.26
  -4 -17  -1    0.08    0.14
  -3 -20  -2    2.01    0.13
  -1 -11  -4   17.87    0.21
  -4 -11  -1    6.69    0.24
  -1 -16  -4    2.78    0.14
  -4 -16  -1    0.09    0.15
  -3 -22  -1   69.83    0.45
  -3  -8  -2   41.48    0.28
  -1 -15  -4  113.30    0.50
  -1 -13  -4    1.04    0.17
  -1 -12  -4  183.53    0.58
  -4 -19   0   37.46    0.34
  -3 -19  -2    0.05    0.11
  -1 -14  -4  269.31    0.74
  -4 -20   1    0.11    0.11
  -2 -22  -2   31.60    0.31
  -1 -21  -3  148.37    0.63
   0 -11  -4    6.27    0.15
  -4 -18   0   11.05    0.21
  -4  -9   0    0.13    0.12
  -3 -18  -2    9.88    0.22
  -3  -9  -2   27.50    0.24
  -2  -9  -3    5.68    0.14
  -3 -21  -1    6.94    0.16
   0 -15  -4    4.91    0.17
   0 -12  -4  202.96    0.55
  -3 -17  -2    0.15    0.14
  -3 -10  -2    1.59    0.16
  -2 -10  -3    3.43    0.14
   0 -14  -4   14.42    0.20
   0 -13  -4   37.62    0.27
  -4 -19   1    0.19    0.12
  -4  -8   1  306.70    0.63
  -1 -20  -3   53.47    0.37
  -4 -16   0   21.74    0.28
  -3 -16  -2    5.26    0.17
  -2 -21  -2   19.08    0.25
  -2 -16  -3    1.32    0.17
  -2 -11  -3    6.12    0.16
  -1 -23  -2   14.91    0.23
   0 -21  -3   34.46    0.30
  -4 -19   2    2.66    0.13
  -3 -22   0    0.23    0.09
  -3 -20  -1    6.20    0.15
  -3 -15  -2   36.63    0.32
  -3 -12  -2  147.10    0.55
  -2 -15  -3  246.74    0.73
  -4 -15   0   26.26    0.28
  -3 -13  -2  212.73    0.66
  -2 -23  -1    3.52    0.12
  -2 -14  -3   58.35    0.36
  -2 -13  -3  124.27    0.49
  -2 -12  -3   16.69    0.21
  -4 -13   0  208.14    0.66
  -4  -9   1  307.58    0.66
  -1 -19  -3    5.31    0.17
  -2 -20  -2   25.65    0.28
  -4 -18   2    6.27    0.16
  -4 -17   1    0.00    0.12
  -3 -19  -1    3.38    0.14
   0 -20  -3    2.01    0.15
  -4 -10   1  102.64    0.41
  -3 -21   0    0.70    0.09
  -1 -18  -3   74.83    0.42
  -4 -16   1    0.93    0.12
  -3  -8  -1  126.07    0.40
   0 -23  -2    4.37    0.13
  -4 -17   2    4.27    0.14
  -4 -15   1    1.02    0.14
  -4 -11   1   43.40    0.29
  -3 -18  -1   12.77    0.21
  -2 -22  -1    0.00    0.08
  -2 -19  -2    4.41    0.15
  -4 -14   1    2.60    0.15
  -4 -12   1   65.69    0.35
  -1 -17  -3   16.61    0.23
  -1  -9  -3    6.55    0.11
  -4 -13   1    0.08    0.12
  -3 -20   0   19.33    0.24
  -3 -17  -1    7.34    0.17
   0 -19  -3    0.13    0.12
  -3  -9  -1    5.05    0.12
  -2 -18  -2   18.94    0.23
  -1 -16  -3  241.25    0.67
  -4 -15   2    1.78    0.16
  -3 -16  -1  111.47    0.50
  -2 -23   0   10.97    0.17
  -2  -8  -2   25.06    0.18
  -4 -12   2    0.91    0.13
  -3 -10  -1   11.07    0.16
  -2 -21  -1    7.44    0.16
  -1 -15  -3  318.38    0.74
   0 -22  -2   58.09    0.37
  -4 -13   2   14.47    0.20
  -3 -19   0   59.33    0.37
  -3 -15  -1   23.59    0.26
  -3 -11  -1   14.97    0.20
  -2 -17  -2    2.54    0.14
  -1 -14  -3 1141.59    1.34
   0 -18  -3   92.42    0.41
  -3 -14  -1   11.81    0.20
  -3 -13  -1    6.40    0.19
  -3 -12  -1   39.47    0.28
  -2  -9  -2    0.36    0.10
  -1 -12  -3    0.65    0.10
  -2 -16  -2   17.50    0.23
  -1 -20  -2   54.34    0.36
  -3 -21   2    0.54    0.11
  -2 -20  -1    3.29    0.15
   0 -17  -3    6.37    0.17
  -3 -18   0   22.21    0.25
  -2 -15  -2    0.77    0.14
  -2 -10  -2  164.27    0.45
  -2 -14  -2    9.25    0.18
  -2 -11  -2   29.32    0.22
   0 -21  -2    1.60    0.12
  -3 -17   0   33.19    0.30
  -2 -23   1    1.46    0.09
  -2 -13  -2  198.98    0.55
  -1 -19  -2    0.03    0.16
  -3  -8   0   55.19    0.25
   0 -23  -1    0.26    0.09
   0 -15  -3    1.99    0.13
  -3 -16   0  129.47    0.51
  -2 -21   0    1.56    0.10
  -3  -9   0   37.79    0.22
  -1 -18  -2  174.23    0.58
   0 -14  -3  355.68    0.68
  -3 -15   0   46.38    0.32
  -2 -18  -1   17.49    0.22
  -1 -23   0    3.09    0.11
   0 -20  -2    1.67    0.11
  -3 -19   2  111.88    0.48
  -3 -14   0    2.05    0.14
  -3 -10   0    0.32    0.08
  -2 -22   1    3.73    0.12
  -1 -21  -1    8.86    0.16
  -3 -13   0    0.23    0.12
  -3 -19   3    4.84    0.14
  -2 -20   0   38.74    0.32
  -2 -17  -1   39.96    0.30
   0 -19  -2   38.22    0.28
   1 -20  -2    6.54    0.16
  -3 -18   2   18.45    0.23
  -3 -16   1   38.98    0.29
  -2 -16  -1    8.00    0.19
  -1 -20  -1  143.12    0.55
  -2 -19   0   42.73    0.32
  -1 -22   0    2.16    0.11
  -3 -18   3    4.48    0.14
  -2 -22   3    3.56    0.10
  -2 -15  -1    0.03    0.13
  -3 -17   2   45.81    0.31
  -3 -15   1   10.77    0.18
  -2  -9  -1   15.74    0.14
  -1 -23   1   22.44    0.22
   0 -18  -2    0.03    0.10
   1 -22  -1   53.34    0.32
  -3 -14   1   43.72    0.30
  -2 -14  -1   15.60    0.20
  -1 -19  -1  167.44    0.58
   0 -23   0    0.07    0.08
   0 -21  -1    1.51    0.13
  -3  -9   1  138.19    0.38
  -2 -20   1   45.48    0.32
  -2 -13  -1    3.92    0.13
  -2 -10  -1  626.80    0.80
  -3 -17   3    7.32    0.14
  -3 -16   2   25.59    0.24
  -3 -13   1   68.69    0.33
  -3 -10   1    0.14    0.09
  -2 -21   2    1.19    0.09
  -2 -12  -1   75.74    0.32
  -2 -11  -1  264.04    0.55
  -1 -21   0    0.16    0.11
  -3 -12   1    0.12    0.10
  -3 -11   1    0.71    0.08
   0 -17  -2    0.78    0.11
  -2 -21   3   10.58    0.16
  -1 -18  -1   16.58    0.24
  -3 -16   3   25.99    0.24
  -3 -15   2    4.45    0.14
  -2 -17   0    5.26    0.15
   1 -18  -2   16.39    0.19
  -2 -19   1   16.52    0.21
   1 -23   0    3.79    0.11
   1 -21  -1   41.86    0.29
  -3 -14   2    9.61    0.17
  -2 -20   2    8.25    0.16
  -3 -15   3    6.91    0.16
  -2 -16   0   29.86    0.26
  -1 -20   0   79.00    0.42
  -1 -17  -1  772.84    1.16
  -3 -13   2    0.08    0.11
   1 -17  -2   24.34    0.22
  -3 -12   2   17.19    0.18
  -3 -10   2   72.48    0.29
  -2 -20   3   23.17    0.23
  -2 -18   1   47.59    0.33
   0 -23   1    0.14    0.07
  -3 -14   3   -0.05    0.10
  -3 -11   2  166.70    0.45
  -2 -15   0   86.05    0.39
   0 -19  -1  586.86    1.03
  -1 -22   2    1.57    0.09
  -1 -21   1   39.07    0.30
  -1 -16  -1  137.02    0.48
   1 -20  -1   73.17    0.37
  -3 -13   3    0.08    0.11
  -2 -14   0    3.39    0.13
  -1 -19   0    9.44    0.17
   1 -22   0    2.36    0.12
  -3 -12   3   66.06    0.31
  -2 -17   1    9.47    0.20
   0 -13  -2   14.86    0.16
   1 -16  -2    0.95    0.10
  -3 -11   3  105.46    0.37
  -2 -13   0    1.21    0.11
  -1 -22   3  115.62    0.49
  -1 -15  -1   39.49    0.27
   2 -22   0   11.32    0.15
  -2 -19   3    0.12    0.11
  -2 -19   4   20.60    0.22
   0 -18  -1  115.87    0.46
  -2 -12   0   28.44    0.21
  -1 -20   1   68.47    0.39
  -1 -18   0  154.18    0.54
  -1 -14  -1  224.66    0.56
   0 -22   1    1.69    0.10
  -2 -16   1    6.42    0.17
  -2 -11   0   51.86    0.25
  -2 -10   0   69.05    0.27
  -1 -21   2    0.34    0.09
   1 -19  -1  142.09    0.51
   1 -15  -2    6.88    0.14
  -2 -18   3   38.57    0.29
  -2 -15   1    2.62    0.16
  -1 -12  -1  207.79    0.49
   0 -17  -1  434.43    0.85
   1 -21   0    0.06    0.10
   1 -14  -2    2.04    0.12
   2 -19  -1   17.00    0.20
  -1 -21   3   45.72    0.32
  -1 -17   0    3.53    0.16
  -1 -11  -1  433.35    0.65
   0 -21   1    1.48    0.12
   2 -21   0    1.55    0.10
  -2 -14   1    3.15    0.15
  -1 -20   2    6.38    0.15
   0 -22   2   59.96    0.35
   1 -23   2   19.07    0.20
   1 -22   1    0.69    0.09
   1 -18  -1  131.50    0.48
   1 -13  -2   25.19    0.19
   0 -16  -1  681.09    1.02
  -2 -17   3   22.90    0.24
  -1 -16   0   21.17    0.22
  -2 -17   4    0.00    0.10
  -2 -13   1    0.93    0.11
  -1 -20   5    0.66    0.09
   1 -20   0   87.85    0.43
   1 -12  -2    0.70    0.09
   2 -22   1    0.14    0.10
  -1 -20   3    3.09    0.13
  -1 -18   1  131.94    0.51
   0 -22   3  101.28    0.46
   2 -18  -1   50.24    0.30
  -2 -12   1  157.83    0.45
  -1 -20   4    9.60    0.17
   0 -22   4   26.31    0.23
  -2 -16   3   33.28    0.28
  -1 -19   2    1.26    0.12
  -1 -15   0   17.54    0.20
   0 -20   1  251.15    0.73
   0 -18   0  306.19    0.76
   1 -17  -1    3.32    0.12
   0 -21   2    1.79    0.11
  -2 -16   4    4.51    0.13
   1 -22   2    4.93    0.13
   1 -21   1    9.93    0.17
  -2 -14   2   20.28    0.21
  -1 -17   1    2.44    0.16
  -1 -14   0    0.26    0.10
   0 -14  -1    0.19    0.10
   1 -19   0   10.68    0.18
   2 -17  -1   10.32    0.18
  -2 -15   3   36.55    0.27
  -1 -18   2   15.75    0.22
  -1 -18   6   40.41    0.31
   0 -21   3   40.19    0.30
   1 -16  -1    8.87    0.15
  -2 -13   2  255.51    0.61
  -1 -13   0   20.22    0.18
   0 -19   1  594.70    1.09
   0 -17   0    0.25    0.13
   2 -22   2   27.89    0.26
  -1 -16   1    8.67    0.18
   0 -21   4    0.00    0.07
   0 -20   2    1.61    0.15
   1 -22   3   10.95    0.17
   2 -19   0   46.74    0.31
  -2 -14   3    3.47    0.13
  -2 -12   2   29.22    0.21
  -1 -12   0   32.90    0.21
  -1 -18   3    1.36    0.16
   1 -21   2   73.06    0.42
   1 -15  -1   52.39    0.28
   2 -16  -1    6.69    0.14
  -1 -18   5    1.48    0.12
  -1 -17   2   25.65    0.26
   0 -16   0  290.67    0.69
  -2 -13   3    9.90    0.16
  -2 -11   2  425.66    0.71
  -1 -18   4    0.71    0.14
  -1 -15   1   52.39    0.31
   0 -20   3    1.92    0.13
   0 -18   1  115.55    0.49
   0 -20   5   11.84    0.18
   3 -20   1    6.08    0.14
   0 -20   4   34.05    0.28
   0 -19   2   36.81    0.31
   2 -20   1    3.42    0.13
   3 -21   2   42.33    0.30
  -2 -13   4  186.38    0.55
   1 -21   3  148.25    0.56
   1 -14  -1   61.52    0.29
   2 -21   2   19.96    0.22
   2 -18   0   54.37    0.32
  -1 -17   3    0.94    0.15
  -1 -16   2    1.12    0.14
  -1 -14   1   60.36    0.32
   0 -15   0   -0.07    0.11
   2 -15  -1    2.35    0.13
   1 -21   4   49.63    0.32
   1 -20   2   50.35    0.35
  -1 -17   4    0.55    0.13
   0 -17   1  453.56    0.92
  -2 -12   4    5.02    0.14
  -2 -11   3    0.16    0.09
   0 -19   3    0.32    0.12
  -1 -13   1    3.81    0.12
   0 -19   5    8.95    0.16
   0 -14   0  291.36    0.64
   1 -13  -1    3.43    0.11
   2 -21   3    0.14    0.07
  -1 -15   2    7.38    0.17
   0 -19   4   -0.04    0.10
   1 -20   3   51.89    0.35
   2 -21   4    3.50    0.12
   2 -17   0    5.36    0.15
   2 -14  -1    3.40    0.12
   3 -19   1    3.81    0.13
   0 -16   1  709.46    1.11
   3 -20   2    2.17    0.12
  -1 -16   4    2.06    0.14
  -1 -12   1   46.69    0.26
   1 -20   5    5.19    0.13
   1 -19   2    0.27    0.11
   1 -12  -1   46.69    0.24
  -2 -10   4    0.10    0.12
   0 -13   0   -0.07    0.09
   1 -20   4    3.12    0.12
  -1 -14   2    2.12    0.13
   0 -17   2    0.74    0.16
   0 -18   5    0.13    0.13
  -1 -11   1  441.63    0.70
   0 -18   4   12.28    0.20
   0 -16   7   13.81    0.20
   2 -20   3    5.29    0.15
   2 -13  -1    0.92    0.09
  -1 -15   5   -0.10    0.10
   0 -15   1   74.53    0.37
  -1 -15   4    3.76    0.15
   0 -12   0   22.15    0.18
   1 -19   3    5.14    0.16
   3 -18   1   13.08    0.19
  -1 -13   2   26.93    0.22
   1 -19   5    0.12    0.10
   1 -18   2  177.74    0.63
   2 -20   4   11.82    0.18
   0 -17   3    6.65    0.17
   1 -19   4   26.01    0.26
   3 -19   2   -0.05    0.12
   0 -16   2  414.42    0.89
   0 -17   5    7.25    0.19
   0 -14   1    0.16    0.12
   1 -14   0    0.08    0.10
  -1 -14   4  104.90    0.46
  -1 -14   5   72.31    0.38
  -1 -12   2    0.93    0.10
   0 -17   4   26.60    0.27
   1 -18   6    0.00    0.09
   2 -19   3   30.20    0.29
   1 -18   3   73.13    0.42
   4 -18   2   12.54    0.18
   1 -17   2   40.65    0.32
   3 -19   3   36.72    0.30
   0 -16   3  115.09    0.50
   0 -15   2  124.51    0.49
   1 -18   5   44.20    0.33
   2 -19   4    6.15    0.15
  -1 -13   5   30.00    0.27
   0 -13   1   34.41    0.24
   1 -18   4    0.80    0.13
   3 -18   2   11.33    0.20
  -1 -13   4  149.22    0.52
  -1 -12   6   35.76    0.29
   0 -16   4    1.08    0.19
   0 -14   7    2.01    0.13
  -1 -12   3    0.43    0.10
   1 -17   6    2.16    0.10
   2 -18   6    1.74    0.10
   2 -14   0    3.27    0.14
   2 -18   3    1.04    0.12
   4 -18   3   12.70    0.19
   0 -15   3    2.19    0.16
   0 -14   2    7.19    0.16
   1 -16   2    3.47    0.17
  -1 -12   4   62.69    0.34
  -1 -12   5   24.94    0.23
   0 -12   1    2.56    0.12
   4 -17   2   17.98    0.22
   1 -17   5    6.62    0.16
   2 -18   4   12.92    0.20
   3 -18   3   25.55    0.26
   3 -14   0    2.17    0.12
   4 -18   4   24.36    0.24
   0 -15   5  140.81    0.56
   0 -13   7   16.93    0.22
   3 -18   5    6.68    0.15
   3 -17   2    0.11    0.12
   2 -13   0    1.05    0.12
   3 -18   4   43.33    0.33
   0 -14   6   19.77    0.24
   0 -13   2   15.75    0.19
   0 -11   1   25.53    0.19
   1 -16   3  238.04    0.73
   2 -17   6    4.77    0.13
  -1 -11   4   78.03    0.35
  -1 -11   5    4.03    0.14
   0 -14   3  384.52    0.84
   1 -15   2  139.84    0.53
   2 -17   3   43.44    0.34
  -1 -10   3   33.59    0.22
   1 -13   8    5.64    0.14
   4 -17   3    0.83    0.12
   0 -14   5    0.86    0.17
   1 -16   4    2.86    0.15
   3 -17   6    3.60    0.12
   0 -14   4   14.41    0.22
   2 -17   4    1.70    0.14
   3 -17   3    5.85    0.17
   3 -13   0    0.07    0.09
   0 -12   7    9.31    0.20
   1 -13   1    3.06    0.12
  -1 -10   4   12.81    0.17
  -1 -10   5   18.53    0.22
   0 -13   6   53.21    0.36
   0 -12   2    6.92    0.15
   3 -17   5   21.87    0.24
   3 -16   2    6.09    0.17
   0 -13   3  615.40    1.01
   1 -15   6   14.34    0.22
   3 -17   4    9.28    0.18
   1 -15   3  327.62    0.82
   2 -16   6    4.55    0.14
   2 -15   7    0.10    0.09
   2 -16   3    0.89    0.14
   0 -13   5   61.54    0.38
   1 -15   5    0.57    0.14
   0 -11   7   -0.01    0.14
   1 -15   4  112.59    0.51
   2 -16   5   79.49    0.45
   3 -16   6    3.72    0.13
  -1  -9   4   24.42    0.20
  -1  -9   5    1.38    0.11
   2 -16   4    5.85    0.17
   3 -14   1   12.57    0.19
   3 -12   0   27.64    0.21
   5 -15   3    0.26    0.08
   0 -12   6   22.48    0.24
   0 -11   2   37.26    0.24
   4 -16   5    8.93    0.17
   4 -15   2    3.79    0.13
   0 -12   3   28.07    0.23
   1 -14   6   39.27    0.33
   3 -15   2   38.85    0.32
   1 -14   3 1115.24    1.45
   2 -15   6    2.70    0.13
   2 -13   1    3.98    0.15
   3 -16   4    3.84    0.15
   3 -16   5    2.62    0.12
   5 -15   4   35.34    0.30
   1 -13   2   91.65    0.39
   2 -14   7    6.64    0.16
  -1  -8   5   24.48    0.21
   0 -10   7   18.86    0.23
   2 -15   3  232.77    0.71
  -1  -8   4   88.30    0.32
   1 -14   4  270.64    0.76
   2 -14   2    9.06    0.18
   0 -11   6  203.03    0.64
   1 -11   1  437.97    0.71
   2 -15   4    0.13    0.14
   2 -15   5    9.53    0.21
   3 -15   6    2.10    0.11
   4 -15   3    7.99    0.19
   4 -13   1    0.41    0.14
   3 -13   1    6.58    0.17
   3 -11   0  227.44    0.53
   0 -11   3   86.71    0.36
   1 -12   7    0.58    0.12
   4 -15   5    1.15    0.12
   4 -14   2  470.77    0.95
   5 -14   3    7.52    0.16
   4 -15   4   63.95    0.39
   1 -12   2   46.99    0.28
   2 -14   6    0.81    0.12
   2 -13   7    8.06    0.17
   3 -15   4   13.80    0.22
   3 -15   5   89.76    0.49
   3 -14   2   11.71    0.20
   2 -12   1   74.42    0.33
   5 -14   4    4.30    0.14
   1 -13   5   61.98    0.39
   2 -14   3   51.04    0.35
   4 -14   6    2.82    0.13
   1 -13   4    1.15    0.15
   2 -13   2  186.48    0.57
   2 -11   8    0.39    0.12
   2 -14   5   38.88    0.32
   3 -14   6    1.63    0.11
   3 -13   7   18.87    0.23
   1 -12   6  141.76    0.57
   1 -11   7    6.01    0.16
   4 -14   3    4.37    0.16
   4 -12   1   12.68    0.19
   1  -9   8    0.49    0.13
   3 -12   1   37.86    0.25
   1 -12   3    0.59    0.12
   3 -10   0    0.22    0.10
   4 -14   5    1.57    0.11
   5 -13   3   23.79    0.25
  -4 -19   1    0.25    0.19
  -4 -11  -1    6.80    0.28
  -4 -17  -1    0.07    0.19
  -4 -12  -1   14.71    0.33
  -4 -18   1   10.71    0.28
  -4 -16  -1   -0.09    0.20
  -4 -15  -1    1.70    0.24
  -4 -13  -1    0.33    0.23
  -4 -10   1  100.04    0.55
  -3  -7  -2  220.40    0.70
  -2  -9  -4   19.52    0.26
  -4 -16   2    2.32    0.19
  -4 -12   2    1.25    0.19
  -4 -15   2    1.99    0.17
  -4 -14   2    3.09    0.23
  -4 -13   2   13.65    0.27
  -4 -11   0  580.17    1.34
  -4 -11   1   42.08    0.40
  -4 -16   0   20.13    0.36
  -4 -12   0  294.55    0.98
  -4 -15   0   26.23    0.38
  -4 -14   0   11.46    0.35
  -4 -13   0  206.16    0.85
  -4 -12   1   64.30    0.49
  -3  -6  -1    1.16    0.15
  -2 -18  -4   10.86    0.28
  -2 -10  -4   74.89    0.45
  -4 -15   1    1.04    0.21
  -4 -14   1    2.68    0.21
  -4 -13   1    0.09    0.20
  -2 -17  -4    1.86    0.20
  -2 -11  -4   74.51    0.46
  -3 -22   0    0.10    0.13
  -3 -19  -2    0.09    0.17
  -2 -16  -4    5.11    0.20
  -2 -12  -4    8.69    0.23
  -3  -9  -2   25.52    0.29
  -3  -7  -1   76.50    0.40
  -2 -15  -4    0.39    0.15
  -2 -14  -4   18.34    0.30
  -2 -13  -4  180.87    0.73
  -3 -21   2    0.59    0.13
  -1 -20  -4    2.37    0.17
  -3 -20  -1    5.53    0.19
  -3 -17  -2    0.36    0.17
  -2 -20  -3    4.89    0.20
  -3 -21   1    8.52    0.24
  -3 -11  -2   83.67    0.49
  -3  -8  -1  127.36    0.51
  -3 -16  -2    5.32    0.22
  -3 -12  -2  143.50    0.65
  -3  -7   0   32.72    0.26
  -2 -22  -2   28.43    0.36
  -2  -8  -3    3.29    0.14
  -3 -20   2   49.27    0.44
  -3 -19  -1    3.22    0.18
  -3 -15  -2   37.08    0.40
  -3 -14  -2   12.87    0.29
  -3 -13  -2  212.68    0.80
  -2 -19  -3   32.94    0.38
  -1 -19  -4   21.81    0.31
  -3 -20   0   17.76    0.29
  -3 -18   3    4.47    0.22
  -3  -9  -1    5.10    0.18
  -3  -8   2   23.85    0.23
  -2 -18  -3    0.81    0.22
  -2  -9  -3    5.39    0.15
  -1 -22  -3    9.90    0.22
  -1  -9  -4    1.26    0.16
  -3 -19   2  114.62    0.62
  -3  -8   0   56.48    0.34
  -2 -21  -2   17.34    0.28
  -1 -18  -4    0.54    0.17
  -3 -17  -1    6.83    0.23
  -3 -10  -1   11.48    0.21
  -3 -19   1    3.86    0.20
  -3 -16  -1  112.52    0.62
  -3 -16   3   26.73    0.32
  -3 -11  -1   15.42    0.27
  -3  -8   1    6.34    0.16
  -2 -17  -3   45.18    0.42
  -2 -10  -3    3.45    0.15
  -3 -18   2   19.18    0.30
  -2 -23   0   10.59    0.22
  -2 -16  -3    1.10    0.22
  -1 -17  -4    1.30    0.18
  -3 -15  -1   22.83    0.32
  -3 -15   3    6.94    0.22
  -3 -14  -1   11.70    0.27
  -3 -13  -1    6.62    0.23
  -3 -12  -1   40.03    0.36
  -3 -12   3   65.96    0.42
  -3  -9   0   38.53    0.30
  -3  -9   2   18.66    0.21
  -2 -22  -1    0.06    0.11
  -2 -11  -3    6.27    0.18
  -3 -18   1   26.77    0.34
  -3 -13   3    0.23    0.16
  -2 -15  -3  239.17    0.84
  -2 -14  -3   57.51    0.44
  -2 -12  -3   16.76    0.25
  -1 -21  -3  139.53    0.72
  -1 -16  -4    3.01    0.18
  -1 -11  -4   16.79    0.23
  -3 -17   2   44.01    0.40
  -3  -9   1  140.45    0.50
  -2 -13  -3  119.26    0.56
  -1 -23  -2   15.52    0.25
  -1 -15  -4  114.38    0.56
  -3 -17   1   13.25    0.30
  -3 -16   0  131.73    0.66
  -3 -10   2   74.03    0.38
  -1 -14  -4  268.02    0.82
  -1 -13  -4    0.80    0.19
  -1 -12  -4  175.97    0.62
  -3 -16   2   25.80    0.31
  -3 -11   0  230.06    0.71
  -2 -21  -1    9.10    0.22
  -2 -19  -2    3.94    0.19
  -3 -16   1   40.34    0.41
  -3 -15   0   47.48    0.42
  -3 -15   2    4.08    0.20
  -3 -14   0    1.81    0.23
  -3 -12   0   27.41    0.29
  -3 -11   2  162.49    0.58
  -3 -10   1    0.62    0.12
  -2 -22   2   13.92    0.25
  -1 -20  -3   52.02    0.43
  -3 -14   2    9.01    0.22
  -3 -13   0    0.06    0.17
  -3 -12   2   15.55    0.24
  -3 -15   1   10.58    0.24
  -3 -13   2   -0.03    0.15
  -3 -11   1    0.64    0.14
  -2 -18  -2   18.84    0.29
  -3 -14   1   42.40    0.37
  -3 -13   1   67.45    0.43
  -3 -12   1    0.11    0.15
  -1 -22  -2    4.62    0.17
  -2 -20  -1    2.86    0.17
  -2 -21   0    1.43    0.14
  -2 -21   2    1.01    0.16
  -2 -20   3   22.86    0.29
  -1 -23  -1    1.18    0.13
  -2 -21   1    7.01    0.20
  -2 -19  -1   15.00    0.27
  -2 -16  -2   17.80    0.29
  -2 -10  -2  169.33    0.55
  -2 -15  -2    0.59    0.18
  -1 -18  -3   73.21    0.47
  -2 -20   0   40.94    0.39
  -2 -14  -2    9.75    0.22
  -2 -11  -2   29.93    0.26
   0 -21  -3   32.95    0.35
  -2 -19   3   -0.16    0.15
  -2 -13  -2  202.38    0.68
  -2 -12  -2   26.14    0.27
  -2 -20   1   43.67    0.39
  -2 -18  -1   17.80    0.27
  -1 -17  -3   16.30    0.25
   0 -23  -2    4.57    0.15
  -1 -23   0    3.19    0.14
  -1 -22  -1    0.41    0.11
  -2 -19   0   43.60    0.40
  -2 -17  -1   39.39    0.37
  -1 -16  -3  242.29    0.80
  -1 -23   2    0.50    0.09
   0 -15  -4    4.74    0.16
  -2 -19   1   17.04    0.29
  -1 -23   1   22.63    0.29
  -1 -15  -3  328.66    0.89
   0 -20  -3    2.03    0.16
  -2 -18   0   50.86    0.41
  -2 -16  -1    8.04    0.24
  -1 -10  -3   53.78    0.30
  -1 -21  -1    9.27    0.21
  -1 -14  -3 1166.42    1.58
  -1 -11  -3   53.17    0.31
  -2 -17   3   24.29    0.30
  -1 -22   0    2.08    0.14
  -1 -13  -3   40.12    0.30
  -1 -12  -3    0.76    0.12
  -2 -18   1   51.15    0.41
  -2 -18   2    0.29    0.16
  -2 -17   0    5.35    0.22
  -2 -14  -1   16.65    0.25
  -2 -10  -1  646.02    0.99
   0 -19  -3    0.04    0.14
  -2 -13  -1    3.87    0.17
  -2 -12  -1   77.88    0.39
  -1 -22   2    1.71    0.13
   0 -24   0   14.95    0.22
   1 -21  -3   43.27    0.36
  -1 -22   1   48.64    0.42
   0 -23  -1    0.17    0.10
  -2 -17   1   10.64    0.27
  -2 -17   2  225.30    0.78
  -2 -16   0   30.11    0.33
  -1 -20  -1  144.62    0.70
  -2 -15   0   91.22    0.48
  -2 -15   3   37.33    0.31
   0 -18  -3   92.41    0.50
  -2 -16   2    8.77    0.23
  -2 -14   0    3.35    0.17
  -2 -14   3    3.46    0.16
  -1 -21   1   42.07    0.38
  -1 -21   2    0.56    0.16
  -1 -19  -1  166.69    0.70
   1 -20  -3    3.21    0.16
  -2 -13   0    1.17    0.14
  -2 -13   3    9.77    0.20
  -2 -10   3   22.80    0.22
   0 -23   0    0.19    0.10
   0 -22  -1    1.74    0.13
  -2 -15   1    2.55    0.17
  -2 -15   2    9.37    0.20
  -2 -12   0   29.38    0.26
  -2 -12   3   55.42    0.33
  -2 -11   3    0.17    0.11
  -1 -20   0   82.92    0.51
  -1 -20   3    3.36    0.18
   0 -20  -2    1.88    0.20
   0 -17  -3    6.38    0.17
   1 -22  -2    1.64    0.14
  -2 -14   2   19.59    0.24
   0 -23   1    0.34    0.11
  -2 -13   2  247.26    0.68
  -1 -18  -1   17.08    0.26
  -1 -18   4    0.77    0.15
   0 -16  -3  107.94    0.50
  -2 -12   2   28.11    0.25
  -2 -10   2  144.27    0.45
  -1 -20   1   72.77    0.48
   1 -19  -3    4.12    0.16
  -2 -11   2  416.04    0.79
  -1 -19   0    9.46    0.22
   0 -21  -1    1.44    0.13
   0 -19  -2   41.32    0.37
  -1 -19   3    4.04    0.17
   0 -21   4   -0.12    0.11
   1 -21  -2    0.37    0.14
  -1 -19   1  138.99    0.64
  -1 -17   4    0.37    0.15
  -1 -19   2    1.25    0.17
  -1 -18   0  152.69    0.65
   0 -14  -3  381.76    0.83
   1 -18  -3    1.38    0.16
   2 -22  -2   13.64    0.21
  -1 -16  -1  139.70    0.58
   0 -18  -2    0.02    0.16
  -1 -18   3    1.23    0.14
   0 -20  -1  251.45    0.85
   0 -13  -3  611.40    1.00
   1 -23   0    3.80    0.14
  -1 -16   4    2.04    0.17
   0 -21   0    0.05    0.12
   0 -12  -3   29.00    0.23
  -1 -18   1  131.29    0.60
  -1 -17   0    3.80    0.21
  -1 -15  -1   40.78    0.32
   0 -21   3   39.95    0.35
   0 -20   4   35.80    0.32
   0 -11  -3   88.84    0.35
  -1 -18   2   17.71    0.26
   0 -17  -2    0.71    0.19
   1 -20  -2    7.01    0.19
   1 -17  -3    0.50    0.17
  -1 -17   3    0.58    0.15
  -1 -14  -1  230.79    0.66
   0 -21   1    1.57    0.15
   1 -23   1    1.11    0.10
  -1 -15   4    3.71    0.18
   0 -19  -1  598.70    1.26
  -1 -17   1    2.63    0.19
  -1 -16   0   21.60    0.27
   0 -20   0  158.01    0.68
  -1 -17   2   25.85    0.29
  -1 -13  -1    2.94    0.14
   0 -16  -2  421.69    0.96
  -1 -16   3    8.90    0.20
  -1 -12  -1  212.95    0.57
   0 -19   4    0.02    0.13
   1 -22   0    2.29    0.12
   1 -16  -3    8.92    0.19
  -1 -15   0   17.97    0.24
   2 -23   0   10.20    0.18
   2 -22  -1    3.82    0.15
   2 -18  -3   39.19    0.33
  -1 -16   1    8.39    0.21
  -1 -11  -1  437.99    0.77
   0 -20   1  253.36    0.87
   0 -18  -1  119.44    0.56
   1 -22   3   10.44    0.20
   3 -21  -2    0.27    0.09
  -1 -16   2    0.76    0.15
   0 -20   2    1.89    0.15
   0 -15  -2  121.49    0.50
   1 -22   1    0.48    0.12
  -1 -15   3   13.69    0.23
   1 -15  -3   13.63    0.21
  -1 -14   0    0.08    0.13
   2 -23   1    3.40    0.13
  -1 -15   1   50.50    0.34
   0 -18   4   12.75    0.22
   0 -17  -1  448.49    1.03
   1 -18  -2   17.58    0.24
  -1 -15   2    7.30    0.19
  -1 -13   0   19.71    0.21
   0 -19   3    0.16    0.14
   0 -14  -2    7.78    0.17
   2 -17  -3   23.59    0.26
  -1 -14   3   54.47    0.34
   0 -19   1  575.43    1.23
   1 -14  -3   55.72    0.34
  -1 -14   1   60.10    0.36
   0 -18   0  297.06    0.87
   2 -22   0   11.08    0.20
  -1 -12   0   33.55    0.25
   0 -13  -2   15.38    0.19
   1 -21   1    9.88    0.21
   3 -20  -2   46.96    0.35
  -1 -14   2    2.34    0.14
  -1 -13   3   71.22    0.37
   0 -16  -1  705.04    1.21
   1 -17  -2   25.69    0.29
   2 -19  -2    1.88    0.16
  -1 -11   0   16.52    0.18
   0 -12  -2    6.69    0.14
   1 -13  -3   72.90    0.35
  -1 -13   1    3.55    0.14
   0 -18   3   97.45    0.50
   1 -20   0   83.50    0.50
   2 -22   1    0.09    0.11
  -1 -13   2   25.91    0.23
  -1 -12   3    0.36    0.11
   0 -17   0   -0.15    0.18
   2 -22   2   35.62    0.33
  -1 -12   1   45.78    0.28
   0 -15  -1   72.48    0.40
   0 -11  -2   37.60    0.24
   1 -12  -3    0.47    0.10
   1 -16  -2    1.00    0.17
  -1 -12   2    0.83    0.10
  -1 -11   3   83.97    0.35
   1 -20   1  145.47    0.67
   2 -21   0    1.68    0.12
  -1 -11   1  427.93    0.74
   0 -17   3    6.28    0.20
   0 -16   4    1.12    0.15
   1 -20   2   53.46    0.41
   1 -11  -3   89.26    0.34
   2 -18  -2    0.39    0.12
   2 -15  -3   37.49    0.30
   3 -19  -2  112.60    0.52
   0 -17   1  441.60    1.02
   0 -14  -1    0.44    0.16
   1 -19   0   10.68    0.21
   3 -22   1   66.74    0.44
  -1 -11   2  467.89    0.78
   2 -19   5    2.38    0.12
   1 -15  -2    7.23    0.20
   2 -21   1    8.80    0.18
   2 -21   2   20.55    0.25
   0 -15   4    4.70    0.19
   0 -13  -1   32.61    0.25
   1 -19   3    5.21    0.22
   2 -14  -3    3.29    0.16
   0 -16   1  671.27    1.20
   0 -16   3  110.50    0.51
   0 -15   0   -0.04    0.14
   1 -19   1  165.19    0.67
   2 -20   0   41.33    0.35
   2 -17  -2  219.63    0.70
   4 -20  -1    0.10    0.09
   1 -19   2    0.19    0.13
   1 -18   0  154.54    0.64
   1 -18   4    0.84    0.13
   3 -18  -2   18.24    0.23
   1 -14  -2    1.91    0.13
   0 -12  -1    2.33    0.12
   3 -21   3    0.08    0.08
   0 -14   4   14.66    0.22
   3 -21   1    7.50    0.16
   0 -15   3    2.15    0.17
   0 -14   0  284.26    0.71
   2 -20   1    2.82    0.15
   1 -18   1   15.84    0.25
   1 -18   3   75.83    0.46
   2 -20   2   25.84    0.29
   2 -19   4    7.17    0.20
   2 -16  -2    8.85    0.19
   3 -19  -1    3.88    0.19
   1 -17   0    3.73    0.23
   1 -17   4    1.08    0.16
   1 -13  -2   26.79    0.23
   2 -19   0   42.99    0.36
   1 -18   2  187.92    0.70
   0 -13   0   -0.15    0.12
   0 -14   1    0.31    0.13
   0 -13   4   38.04    0.29
   4 -20   0   20.60    0.25
   0 -14   3  375.70    0.84
   1 -17   1  763.53    1.37
   1 -12  -2    0.61    0.11
   2 -19   1   16.26    0.26
   2 -17  -1   10.54    0.24
   2 -15  -2    9.47    0.21
   3 -20   1    5.19    0.16
   3 -20   3   35.10    0.33
   1 -17   3   16.93    0.25
   3 -20   2    2.00    0.13
   1 -17   2   40.26    0.36
   1 -16   0   21.60    0.27
   1 -16   4    3.09    0.15
   2 -18   0   51.29    0.39
   2 -18   4   13.84    0.24
   3 -18  -1   27.16    0.29
   3 -18   5    6.60    0.16
   0 -13   1   32.40    0.25
   0 -12   4  201.30    0.58
   3 -19   4    0.85    0.11
   4 -20   1    1.75    0.12
   0 -13   3  599.99    1.02
   1 -11  -2  490.91    0.78
   4 -18  -1   10.18    0.21
   2 -14  -2   20.63    0.24
   4 -19   0   38.62    0.33
   1 -16   1  136.96    0.58
   1 -16   3  246.62    0.77
   2 -18   1   17.78    0.26
   0 -12   1    2.39    0.13
   0 -11   4    6.18    0.14
   1 -15   0   17.47    0.24
   2 -16   5   79.31    0.46
   3 -19   1    2.90    0.15
   3 -19   3   34.19    0.33
   4 -16  -2    2.39    0.16
   0 -12   3   27.55    0.24
   1 -15   4  112.78    0.52
   2 -18   2   19.71    0.27
   2 -17   0    5.27    0.21
   3 -19   2    0.01    0.13
   3 -17  -1   13.08    0.25
   2 -17   4    1.72    0.16
   3 -18   0   24.69    0.32
   4 -19   1    0.29    0.09
   0 -10   4   17.42    0.20
   5 -17  -1    7.52    0.17
   0 -11   1   24.65    0.20
   1 -15   1   39.10    0.33
   4 -19   2    7.93    0.17
   4 -17  -1    0.13    0.15
   5 -18   0   -0.10    0.12
   0 -11   3   90.50    0.38
   1 -15   3  334.94    0.87
   1 -14   0   -0.04    0.13
   2 -17   1   39.87    0.35
   2 -15  -1    2.54    0.17
   4 -18   0   10.90    0.23
   1 -15   2  136.26    0.56
   1 -14   4  271.64    0.78
   3 -18   1   12.40    0.25
   4 -18   4   27.52    0.29
   4 -15  -2    1.90    0.17
   0 -11   2   36.17    0.24
   2 -17   2    2.71    0.18
   2 -16   0   29.22    0.31
   2 -16   4    5.96    0.19
   3 -18   2   10.48    0.23
   3 -16  -1   41.44    0.34
   3 -17   0   35.40    0.34
   3 -16   5    2.91    0.17
   3 -14  -2    9.74    0.19
   2 -12  -2   29.66    0.24
   4 -18   1   36.02    0.35
   1 -14   1  235.58    0.69
   1 -14   3 1200.93    1.59
   1 -13   0   19.68    0.22
   2 -14  -1    3.59    0.19
   4 -18   3   12.15    0.21
   5 -18   2    3.06    0.14
   5 -16  -1    7.83    0.18
   2 -16   1    7.97    0.24
   4 -18   2   11.46    0.21
   4 -16  -1    1.09    0.16
   5 -17   0    0.21    0.13
   1 -14   2   72.25    0.41
   1 -13   4    0.85    0.14
   4 -17   0   43.42    0.38
   2 -16   2   18.25    0.28
   2 -15   0   89.33    0.47
   2 -14   5   44.00    0.36
   4 -17   4   34.26    0.36
   4 -14  -2    3.24    0.18
   2 -15   4    0.03    0.18
   3 -17   3    5.71    0.19
   3 -15  -1   11.10    0.22
   2 -11  -2  439.15    0.79
   3 -17   2    0.07    0.15
   3 -13  -2    0.24    0.13
   1 -13   1    3.17    0.14
   1 -12   0   32.12    0.25
   3 -16   0  131.57    0.61
   3 -15   5   99.34    0.54
   1 -13   3   41.70    0.32
   2 -13  -1    1.06    0.13
   3 -16   4    3.99    0.20
   4 -17   1    0.27    0.15
   5 -17   3    4.78    0.16
   2 -15   1    0.11    0.18
   4 -17   3    0.68    0.13
   1 -13   2   94.67    0.44
   1 -12   4  182.71    0.60
   4 -15  -1    1.15    0.16
   5 -17   2   16.56    0.24
   2 -14   0    3.01    0.17
   2 -13   5  214.28    0.73
   4 -16   0   20.92    0.29
   5 -16   0    2.03    0.14
   2 -15   2    0.74    0.19
   3 -16   1  111.43    0.57
   3 -16   3    0.28    0.17
   3 -14  -1   44.65    0.36
   4 -13  -2   15.19    0.25
   2 -14   4   19.58    0.27
   2 -10  -2  146.56    0.44
   6 -15   0    3.30    0.14
   1 -12   1  216.62    0.61
   1 -11   0   16.73    0.19
   3 -15   0   46.14    0.38
   1 -12   3    0.77    0.13
   2 -12  -1  163.81    0.54
   3 -14   5    5.37    0.18
   1 -11   4   16.97    0.23
   3 -15   4   17.68    0.28
   4 -16   1    0.20    0.17
   5 -16   1    0.27    0.12
   5 -16   3   12.76    0.23
   1 -12   2   48.85    0.32
   2 -14   1   15.54    0.26
   4 -16   3    5.52    0.19
   2 -13   0    1.06    0.16
   2 -12   5  114.19    0.54
   4 -16   2  165.62    0.75
   4 -14  -1    2.70    0.16
   5 -14  -1    9.90    0.21
   2 -14   2    9.72    0.23
   3 -15   1   22.89    0.34
   4 -15   0   25.24    0.32
   5 -15   0   38.09    0.36
   2 -13   4  189.05    0.70
   3 -15   3   22.49    0.31
   3 -13  -1   70.96    0.42
   4 -14   5    1.70    0.17
   4 -12  -2    0.93    0.15
   5 -15   4   38.37    0.36
   6 -15   2   18.98    0.26
   1 -11   1  438.15    0.82
   3 -15   2   36.42    0.39
   1 -11   3   52.32    0.32
   3 -14   0    1.81    0.18
   4 -12   6    1.00    0.14
   2 -11  -1    0.38    0.12
   3 -14   4   57.05    0.46
   3 -13   5    0.13    0.14
   1 -10   4   40.83    0.29
   2 -13   1    4.18    0.18
   4 -15   1    2.12    0.19
   5 -15   1    1.47    0.16
   4 -15   3    8.28    0.23
   5 -15   3    0.08    0.11
   2 -12   0   28.82    0.26
   2 -11   5    0.49    0.17
   4 -15   2    3.69    0.20
   4 -13  -1    0.05    0.15
   5 -15   2   47.87    0.41
   2 -13   2  201.41    0.69
   3 -14   1   11.73    0.26
   4 -14   0   10.80    0.26
   5 -14   0    7.46    0.22
   5 -13   5    1.01    0.16
   2 -12   4    8.95    0.21
   3 -14   3   45.53    0.41
   3 -12  -1    0.25    0.14
   4 -13   5    6.58    0.20
   5 -14   4    3.45    0.17
   6 -12  -1    6.16    0.19
   3 -14   2   12.14    0.29
   6 -14   2    0.48    0.11
   1 -10   3   53.74    0.32
   2 -10  -1   73.81    0.36
   3 -13   0    0.26    0.17
   3 -12   5    4.64    0.19
   4 -11   6    5.19    0.21
   1  -9   4    0.95    0.13
   3 -13   4    0.90    0.19
   2 -12   1   76.35    0.41
   4 -14   1   13.53    0.30
   5 -14   1   29.64    0.36
   4 -14   3    4.77    0.21
   5 -14   3    7.19    0.20
   2 -11   0   53.67    0.34
   4 -14   2  456.31    1.21
   4 -12  -1   70.69    0.45
   5 -14   2  178.66    0.80
   2 -12   2   26.40    0.28
   3 -13   1    6.59    0.24
   5 -13   0   13.79    0.30
   6 -13   1    9.61    0.21
   6 -13   3   15.98    0.26
   2 -11   4   79.18    0.45
   3 -13   3   89.60    0.55
   4 -12   5   16.06    0.29
   4 -10  -2   17.49    0.25
   5 -13   4   26.00    0.34
   6 -11  -1  104.47    0.56
   3 -13   2  208.07    0.78
   5 -10   6   51.95    0.46
   6 -13   2    0.59    0.12
   3 -12   0   26.77    0.30
   3 -11   5   55.59    0.44
   4 -10   6    3.75    0.20
   3 -12   4    1.91    0.20
   2 -11   1  264.08    0.72
   5 -13   1  142.29    0.72
   4 -13   1    0.34    0.22
   4 -13   3   30.44    0.36
   5 -13   3   26.05    0.34
   2 -10   0   69.48    0.36
   2  -9   5  197.08    0.68
   4 -13   2   45.11    0.42
   4 -11  -1   43.26    0.37
   5 -13   2  302.24    1.05
   5 -11  -1  216.12    0.79
   5 -12   0   16.47    0.32
   5 -11   5    1.13    0.17
   6 -12   3   35.26    0.37
   2 -10   4   76.56    0.44
   3 -12   1   39.24    0.36
   3 -12   3   25.86    0.34
   4 -11   5   40.61    0.40
   5 -12   4    5.14    0.20
   5  -9   6    2.61    0.18
   6 -12   2  101.31    0.62
   3 -12   2  138.93    0.65
   3 -11   0  218.35    0.72
   3 -10   5    2.13    0.22
   4  -9   6   67.87    0.50
   6 -11   0   17.68    0.29
   6 -11   4   30.70    0.39
   3 -11   4   55.75    0.45
   5 -12   1    4.21    0.27
   2 -10   1  612.51    1.07
   4 -12   1   13.90    0.31
   7 -10   2    3.91    0.16
   2  -8   5   53.12    0.38
   5 -12   2   61.84    0.51
   7  -9   0    2.46    0.17
   2 -10   2  165.33    0.59
   4 -10   5    1.51    0.23
   5 -11   4   -0.01    0.18
   5 -10  -1    1.57    0.20
   5 -10   5   11.61    0.26
   6 -11   3    0.23    0.13
   2  -9   4   19.50    0.27
   3 -11   3   20.66    0.34
   5 -11   0  315.06    1.02
   5  -8   6    0.35    0.17
   6  -9   5    0.53    0.13
   4  -8  -2 1320.01    1.62
   4  -8   6   97.06    0.60
   6 -10   4    4.69    0.19
   6  -9  -1   12.72    0.28
   3 -11   2   81.53    0.51
   3  -9  -1  140.50    0.53
   3  -9   5   25.78    0.35
   7  -9   3    9.21    0.25
   3 -10   4   45.15    0.44
   5 -11   3   17.35    0.35
   7  -9   2    0.15    0.13
   4 -11   3   12.68    0.31
   5 -11   1   42.50    0.44
   7  -8   0    0.28    0.16
   2  -9   1   15.51    0.22
   2  -9   3    5.69    0.21
   2  -7   5   40.38    0.36
   5 -11   2    7.37    0.25
   5  -9   5   28.27    0.40
   6 -10   3    2.46    0.18
   4 -11   2   63.39    0.52
   4  -9   5   43.20    0.45
   5 -10   4    0.93    0.18
   5  -9  -1  830.59    1.57
   6  -8   5    0.25    0.14
   4  -9  -1  298.97    0.86
   5 -10   0  685.36    1.50
   5  -7   6    1.93    0.19
   6 -10   2   -0.03    0.16
   2  -9   2    0.27    0.16
   2  -8   4   19.78    0.26
   4  -7   6    1.96    0.25
   6  -8  -1   21.29    0.34
   7  -8   3    1.47    0.16
   3  -8   5   76.97    0.52
   6  -9   0    1.12    0.20
   3 -10   2    1.87    0.20
   3  -8  -1    6.03    0.20
   4  -7  -2    3.15    0.20
   3  -9   4   11.78    0.27
   4 -10   3    1.47    0.27
   7  -7   0    7.86    0.25
  -1  -7   6   25.14    0.96
  -1 -17   2   24.92    0.93
  -1 -16   1    8.33    0.85
  -1 -15   5    0.43    0.74
  -1  -8   6   11.27    0.99
   0 -20   4   35.99    1.05
  -1 -17   3    0.82    0.79
   0 -17   6    9.71    0.70
   0 -13   7   14.98    0.87
  -1  -4   5  267.61    1.66
   0 -20   3    1.62    0.71
   0  -6   7    7.84    0.81
   1 -19   6    1.03    0.47
   0 -18   5    0.01    0.71
   0 -16   6   24.41    0.96
  -1 -15   4    3.53    0.91
  -1 -13   5   27.68    1.07
   0 -11   7   -0.19    0.74
   0  -7   7  126.17    1.55
  -1  -5   5  106.79    1.19
   0 -10   7   19.76    0.89
   0  -9   7   77.66    1.32
   1 -21   4   39.47    1.02
   1 -20   5    5.29    0.60
  -1 -12   5   26.51    1.18
  -1 -15   2    7.49    0.74
  -1 -14   1   63.73    1.05
  -1 -14   4  108.64    1.67
  -1  -6   5   32.20    0.78
   0 -19   2   39.71    1.06
   1 -18   6    0.02    0.54
  -1 -11   5    3.19    0.91
   0 -17   5    6.89    0.80
  -1  -9   5    1.24    0.77
  -1  -7   5  104.77    1.25
   1 -21   2   73.91    1.41
   1 -21   3  149.27    1.81
   2 -12   8    2.68    0.51
   0 -18   4   12.67    0.85
  -1 -14   2    2.13    0.67
  -1 -14   3   49.97    1.24
   0 -18   1  121.59    1.50
   1 -14   7    2.43    0.83
   2 -11   8    0.56    0.58
   1 -20   4    2.40    0.60
  -1 -12   4   64.55    1.25
   0 -18   3   96.21    1.62
   0 -13   6   55.30    1.34
   1 -17   6    2.54    0.53
  -1 -13   3   71.68    1.23
  -1 -13   2   25.60    0.81
  -1 -12   1   46.13    0.89
  -1 -11   4   77.58    1.26
   0 -17   4   27.44    1.04
   0  -4   6  107.89    1.26
  -1 -10   4   13.13    0.78
   0 -12   6   23.90    1.12
   1 -20   3   48.38    1.21
  -1 -12   3    0.52    0.65
  -1  -9   4   24.39    0.84
   1 -16   6   32.95    1.09
   1 -12   7    0.68    0.90
   2 -18   6    1.28    0.55
  -1  -8   4   90.76    1.16
   0 -17   1  440.40    2.54
   0  -5   6   19.88    0.83
   1 -18   5   43.73    1.09
   2 -15   7    0.65    0.51
  -1 -11   3   86.79    1.19
   0 -10   6   64.58    1.39
   1 -11   7    6.45    0.93
   0  -9   6  274.16    2.27
   0  -6   6   17.82    0.82
   2 -21   3    0.10    0.64
  -1 -10   3   33.87    0.87
   0  -8   6  135.02    1.55
   0  -7   6  527.99    2.75
   1 -15   6   13.22    0.82
   1  -9   7  315.46    2.38
   2 -21   2   20.78    0.78
   2 -19   5    2.05    0.58
  -1 -10   2  300.34    1.73
  -1  -9   3  167.67    1.41
  -1  -8   3   61.78    0.93
   1 -17   5    6.83    0.73
   1  -8   7  437.57    2.76
   1  -7   7   94.04    1.48
   2 -17   6    4.78    0.57
   0 -16   1  701.69    3.12
   0 -13   5   63.04    1.40
   0 -16   2  414.44    2.61
   1 -14   6   34.72    1.09
   0 -12   5  126.74    1.70
   1 -16   5   24.49    1.02
   2 -16   6    4.36    0.67
   0 -14   4   14.70    1.01
   3 -14   7    4.66    0.47
   0 -15   3    2.30    0.79
   0 -14   0  286.64    1.78
   0 -11   5  118.03    1.56
   3 -17   6    3.81    0.52
   0 -15   1   73.80    1.10
   1 -18   3   80.74    1.43
   1 -17   4    1.07    0.71
   2 -20   2   26.04    0.96
   0 -15   2  121.56    1.46
   0 -10   5   75.64    1.29
   1 -18   1   17.77    0.94
   0 -13   4   39.84    1.16
   1 -18   2  183.15    1.87
   0 -14   3  380.72    2.47
   0  -5   5   13.11    0.68
   2 -10   7  419.02    2.86
   0  -8   5   33.82    0.92
   0  -6   5   30.45    0.79
   1 -11   6   56.20    1.31
   2 -17   5    7.87    0.68
   0 -12   4  202.07    1.90
   2  -9   7    1.98    0.73
   3 -18   5    6.84    0.62
   3 -16   6    4.43    0.58
   0 -14   2    7.18    0.73
   1 -17   3   16.14    1.02
   1 -16   4    3.03    0.79
   1 -10   6   83.45    1.40
   2 -18   4   12.54    0.77
   2 -14   6    0.53    0.62
   2  -7   7   56.26    1.21
   0 -13   3  630.87    2.98
   3 -19   4    0.86    0.57
   1 -17   1  773.99    3.36
   1 -17   2   39.88    1.18
   1  -9   6  304.56    2.32
   2 -16   5   74.39    1.53
   3 -11   7   25.80    0.99
   1  -8   6  404.97    2.55
   3 -15   6    1.85    0.55
   0 -13   1   32.41    0.83
   0 -10   4   18.80    0.79
   1 -15   4  111.79    1.61
   1 -13   5   65.60    1.39
   1  -7   6  405.31    2.47
   1  -6   6   19.10    0.92
   1  -5   6   19.85    0.88
   0 -12   3   27.86    0.88
   3 -17   5   20.09    0.80
   3 -10   7  117.36    1.61
   0  -9   4  222.99    1.76
   1 -12   5  583.80    3.33
   2 -15   5   10.36    0.89
   3 -19   3   36.44    1.00
   3 -18   4   42.77    1.06
   3 -14   6    1.39    0.59
   0 -11   3   93.37    1.21
   1 -14   4  279.89    2.38
   3  -8   7   66.12    1.37
   0  -7   4  546.13    2.35
   1 -16   1  137.63    1.49
   2 -18   2   19.95    1.00
   1 -15   3  333.77    2.43
   1 -11   5  810.80    3.66
   2 -18   1   17.67    1.04
   2 -11   6   47.71    1.24
   3 -16   5    2.46    0.58
   0 -10   3   72.84    1.07
   4 -19   3    3.48    0.45
   4  -9   7    1.27    0.61
   3 -19   1    3.20    0.77
   1 -13   4    3.15    0.91
   1 -10   5   94.37    1.41
   2 -10   6  138.16    1.83
   3 -17   4    8.74    0.74
   4 -16   5    8.76    0.66
   1 -15   2  140.01    1.57
   3 -18   3   25.59    0.98
   1 -15   1   39.39    0.99
   1 -14   3 1203.58    4.28
   2  -9   6  129.15    1.65
   3 -15   5   96.68    1.53
   4 -13   6   -0.19    0.57
   1 -12   4  182.91    1.94
   2 -17   2    2.80    0.77
   2 -13   5  202.90    2.14
   1  -8   5   34.58    0.95
   2  -8   6  143.42    1.70
   4 -17   4   32.31    0.98
   1  -7   5  294.88    1.97
   2  -7   6  191.32    1.88
   3 -18   2   11.20    0.82
   3 -11   6    0.50    0.83
   4 -18   3   14.05    0.74
   1 -14   2   71.31    1.20
   1 -13   3   41.03    1.08
   2 -12   5  114.92    1.69
   3 -14   5    5.11    0.82
   1 -14   0    0.08    0.54
   1 -11   4   18.31    0.93
   2  -6   6  280.19    2.08
   1  -5   5  355.71    1.97
   1  -4   5   25.32    0.76
   2 -14   4   19.19    0.98
   2  -5   6    9.59    0.76
   1 -14   1  231.06    1.73
   3 -10   6   19.77    1.00
   2 -16   2   18.69    0.98
   2 -11   5    0.46    0.91
   4 -11   6    4.97    0.71
   2 -16   0   28.45    0.95
   2 -15   3  246.35    2.24
   4 -16   4  100.52    1.47
   4 -14   5    1.67    0.62
   5 -16   4  137.77    1.67
   5 -14   5   -0.27    0.53
   2 -16   1    7.69    0.87
   3 -15   4   16.90    0.96
   3  -9   6   53.03    1.23
   2 -13   4  181.15    2.03
   4 -18   1   39.73    1.05
   2 -10   5   18.91    0.99
   4 -10   6    3.98    0.74
   1 -13   0   19.31    0.69
   1  -9   4    1.17    0.67
   3 -16   3    0.41    0.87
   3 -17   1    7.37    0.77
   3 -12   5    4.69    0.85
   4 -13   5    6.23    0.83
   1 -11   3   53.56    1.02
   2 -14   3   57.14    1.29
   3  -7   6   61.03    1.28
   4 -15   4   64.10    1.28
   1  -8   4   19.12    0.79
   3 -14   4   57.69    1.28
   4  -9   6   70.53    1.35
   5 -15   4   37.29    1.00
   5  -9   6    3.09    0.73
   1 -12   2   48.82    0.94
   3  -6   6    5.15    0.79
   2 -15   0   85.36    1.20
   2  -8   5   54.78    1.27
   3 -16   2    5.98    0.88
   3 -11   5   58.31    1.40
   3  -5   6    2.71    0.85
   4  -8   6   99.23    1.49
   5 -16   3   12.22    0.71
   5  -8   6    0.10    0.64
   1 -10   3   52.41    1.01
   3 -15   3   22.26    1.11
   4 -12   5   17.08    0.84
   5 -12   5    0.65    0.59
   1 -12   1  216.43    1.54
   2 -13   3  119.05    1.60
   1  -6   4  296.20    1.72
   2 -11   4   79.31    1.40
   2  -7   5   41.38    1.09
   3 -13   4    1.07    0.74
   4  -7   6    2.07    0.64
   5 -17   1    0.33    0.62
   5  -7   6    2.41    0.68
   1 -11   2    9.20    0.72
   3 -16   1  116.43    1.58
   3 -16   0  125.88    1.61
   1  -9   3    7.15    0.74
   2  -6   5  220.25    1.77
   4 -16   2  187.93    2.14
   4 -11   5   38.89    1.17
   5  -6   6   11.76    0.85
   3 -14   3   44.90    1.27
   4  -5   6    3.28    0.89
   5 -16   2    0.97    0.58
   2 -14   1   16.81    0.75
   2 -12   3   16.04    0.94
   2 -10   4   77.72    1.31
   2  -5   5   47.53    1.02
   3 -15   2   37.06    1.17
   3 -12   4    1.63    0.84
   3  -9   5   24.71    1.11
   4 -13   4   23.29    1.03
   1  -8   3   25.40    0.77
   2  -4   5  129.10    1.32
   5 -13   4   30.31    0.94
   6 -14   3   25.26    0.83
   2  -3   5    1.91    0.63
   6 -12   4   14.33    0.76
   6  -9   5    1.20    0.52
   2  -9   4   19.77    0.89
   3 -15   1   23.22    0.96
   4 -16   0   21.12    1.04
   3 -13   3   87.86    1.56
   3 -11   4   56.24    1.37
   5 -14   3    6.93    0.84
   3 -15   0   46.52    1.14
   4 -12   4   52.42    1.28
   4  -9   5   48.56    1.28
   6  -8   5    0.17    0.67
   3  -7   5  215.29    2.03
   5  -9   5   31.29    1.03
   2 -12   2   25.26    1.03
   2  -8   4   20.79    0.86
   6 -15   1    9.67    0.71
   6 -13   3   19.23    0.76
   6 -11   4   42.32    1.08
   2 -13   0    0.93    0.55
   4  -8   5   59.38    1.33
   6 -14   2    1.12    0.56
   6  -7   5    0.09    0.71
   2 -10   3    2.31    0.69
   3 -12   3   26.54    1.13
   3 -10   4   46.75    1.24
   3  -6   5   84.35    1.29
   4 -15   1    1.96    0.78
   4 -11   4  132.58    1.81
   5  -8   5    4.95    1.01
   3 -14   1   12.21    1.00
   5 -13   3   24.86    0.98
   5 -11   4   -0.14    0.81
   3 -13   2  214.77    1.99
   3  -5   5   20.54    0.88
   4 -15   0   27.13    1.06
   4  -7   5   63.19    1.30
   5 -14   2  184.46    1.99
   6 -10   4    5.72    0.63
   2 -12   1   77.01    1.07
   5  -7   5   38.70    1.26
   2 -11   2   28.04    0.88
   2  -6   4  209.12    1.61
   3 -14   0    1.84    0.71
   3  -9   4   11.55    0.94
   5 -15   0   40.26    1.07
   2  -9   3    5.47    0.76
   3  -4   5   35.51    0.97
   4 -10   4   17.01    1.07
   6  -5   5    8.16    0.74
   3 -11   3   22.66    1.07
   4 -12   3   25.13    1.03
   4  -6   5    4.47    0.82
   5 -10   4    0.67    0.76
   2 -12   0   28.86    0.81
   3  -3   5    0.48    0.67
   5 -12   3   15.02    0.95
   2  -5   4  127.63    1.23
   3  -2   5   96.33    1.28
   4 -14   1   14.29    0.93
   3  -8   4    4.95    0.84
   4  -5   5    3.44    0.85
   6 -11   3   -0.03    0.54
   4  -9   4   12.45    1.07
   5 -13   2  305.13    2.54
   2 -10   2  169.72    1.48
   2  -8   3    3.11    0.73
   2 -11   1  271.08    1.75
   3 -10   3    0.51    0.87
   3 -13   0    0.25    0.81
   5 -11   3   16.61    0.99
   5  -4   5   77.85    1.45
   6 -13   1   10.40    0.66
   6 -12   2   93.86    1.53
   3 -13  -1   69.12    1.23
   4  -8   4   37.50    1.21
   4  -3   5   18.53    0.98
   6 -10   3    2.97    0.60
   4 -13   1    0.33    0.84
   4 -12   2   10.59    1.07
   5  -3   5   44.90    1.26
   2 -11   0   52.35    0.87
   3 -12   1   40.06    1.15
   3 -11   2   85.73    1.34
   4  -2   5   13.60    0.98
   5 -12   2   64.54    1.32
   6  -7   4    8.18    0.81
   2  -9   2    0.19    0.66
   3  -6   4   15.97    0.84
   5  -2   5  240.00    2.07
   7  -4   4    7.71    0.63
   6 -13  -1    1.93    0.65
   7 -11   1   43.02    1.01
   4 -13   0  198.11    1.88
   6  -9   3   14.61    0.85
   6  -6   4    2.79    0.75
   5 -13   0   13.05    1.00
   7  -7   3   20.49    0.84
   3 -12   0   26.97    0.86
   3  -5   4  234.51    1.74
   4 -11   2   66.85    1.40
   7  -9   2    0.41    0.50
   5 -11   2    7.90    0.84
   7 -11   0    1.62    0.45
   3 -12  -1   -0.06    0.72
   6  -5   4    7.75    0.89
   5  -6   4    3.87    0.91
   6 -12   0    9.81    0.94
   6 -10   2   -0.14    0.82
   7 -10   1    5.24    0.64
   3  -4   4  316.15    1.94
   6  -8   3    6.09    0.76
   6 -11   1   49.27    1.21
   6 -12  -1    6.81    0.85
   7  -8   2    4.44    0.61
   4 -12   0  287.89    2.18
   4  -5   4   53.29    1.19
   5  -5   4    0.70    0.84
   3  -9   2   25.89    0.87
   3  -7   3  173.87    1.55
   3  -3   4   40.51    0.88
   5 -12   0   15.40    0.94
   7  -5   3    2.90    0.63
   6  -7   3   11.48    0.89
   6  -3   4    7.94    0.92
   7 -10   0    3.30    0.64
   7  -9   1    9.20    0.75
   3 -11   0  226.53    1.66
   4 -12  -1   66.03    1.25
   5 -11   1   44.17    1.30
   6  -9   2   29.00    1.09
   4  -4   4    5.42    0.78
   5 -12  -1   31.76    1.02
   3  -2   4   32.61    0.77
   6  -2   4   78.52    1.41
   7 -10  -1    7.04    0.69
   7  -4   3   22.11    1.02
   3 -11  -1    0.65    0.64
   6 -10   1    1.32    0.78
   3  -6   3  267.14    1.78
   4  -7   3    6.21    0.91
   5  -7   3   16.62    1.10
   6  -6   3   19.25    0.95
   3  -1   4   84.69    1.04
   4  -9   2    4.18    0.95
   5  -9   2   -0.16    0.86
   5  -3   4   47.31    1.14
   6 -11  -1  101.29    1.45
   6  -1   4  164.52    1.84
   3  -8   2   39.94    0.94
   4 -11   0  595.87    2.93
   6  -8   2   82.69    1.49
   7  -8   1    3.70    0.60
   7  -3   3   15.00    0.91
   5 -11   0  324.28    2.40
   7  -6   2    7.84    0.67
   5 -10   1   63.28    1.41
   5  -2   4   76.78    1.39
   3 -10   0    0.33    0.66
   4  -2   4  101.57    1.28
   5  -6   3   20.40    1.14
   7  -2   3   12.37    0.88
   4 -11  -1   42.98    1.00
   5 -11  -2    0.06    0.84
   5 -11  -1  208.05    1.86
   5  -8   2   11.25    0.96
   7  -9  -2   25.18    0.89
   4  -8   2   57.21    1.23
   4  -1   4   52.33    1.14
   5  -1   4    1.02    0.80
   6  -7   2    7.90    0.92
   7  -5   2   60.25    1.22
   7  -1   3   14.47    0.89
   3  -7   2  222.22    1.59
   6  -4   3  265.62    2.34
   7  -8   0    0.48    0.59
   5   0   4    0.62    0.86
   3 -10  -1    0.49    0.59
   4 -10   0   81.99    1.37
   4  -5   3  303.14    2.07
   4   0   4   12.18    0.84
   5 -10   0  723.96    3.39
   6 -10  -2    0.38    0.69
   7   0   3    2.85    0.81
   4  -9   1    7.65    0.91
   6  -8   1   33.21    1.10
   7  -4   2   18.70    0.95
   5   1   4   -0.54    0.88
   6  -3   3   74.09    1.55
   7  -6   1    2.89    0.73
   5  -7   2   23.72    1.22
   7  -8  -1    0.90    0.67
   3  -9   0   39.40    0.88
   3  -8   1  126.82    1.27
   7  -8  -2   14.51    0.83
   5 -10  -1    0.96    0.82
   3  -6   2  198.58    1.47
   3  -3   3  108.32    1.12
   4 -10  -1  100.70    1.28
   5 -10  -2   79.38    1.25
   5  -8   1    2.61    1.05
   6  -9  -1   12.20    0.92
   4 -10  -2   17.31    0.79
   6  -7   1  132.46    1.72
   6  -5   2  208.36    2.02
   4  -8   1    8.19    0.84
   5  -6   2  208.45    1.97
   5  -3   3  768.86    3.32
   6  -9  -2    6.67    0.74
   6  -8   0   81.53    1.40
   4  -6   2    3.66    0.79
   3  -9  -1  140.16    1.17
   4  -3   3   78.80    1.13
   7  -7  -3    0.40    0.58
   7  -6   0    8.76    0.76
   7  -7  -2   35.98    1.00
   3  -7   1   75.19    1.00
   3  -5   2   59.44    0.91
   6  -4   2   90.99    1.48
   6   0   3   -0.73    0.86
   7  -1   2    4.99    0.90
   3  -8   0   55.56    0.93
   5  -9  -1  857.11    3.44
   5  -7   1  277.54    2.16
   5  -2   3  329.21    2.20
   6  -6   1   29.98    1.03
   8  -2   0    0.78    0.53
   4  -9  -1  303.21    1.89
   4  -2   3   15.88    0.83
   5  -9  -2  152.33    1.61
   5  -8   0   79.96    1.35
   6  -7   0   33.71    1.11
   6  -8  -3    5.43    0.79
   7  -5   0   37.85    1.06
   7   0   2   -0.33    0.76
   5  -1   3   24.39    0.95
   6  -3   2    6.09    0.99
   7  -3   1    4.34    0.74
   8  -1   0    5.68    0.61
   4  -9  -2 1276.27    3.56
   6   2   3    3.46    0.85
   7  -6  -3   -0.23    0.68
   7  -6  -2   14.99    0.88
   7   1   2    4.82    0.75
   4  -1   3   96.55    1.19
   5  -6   1  738.53    3.17
   5  -4   2   11.67    0.97
   8   0   0   -0.59    0.48
   5   0   3  202.89    1.65
   7  -4   0   35.91    1.00
   7   2   2    8.72    0.86
   5  -8  -1  645.22    2.88
   6  -6   0   14.82    0.89
   4  -6   1   76.38    1.08
   4  -4   2  270.72    1.71
   7   3   2   38.50    1.03
   8  -1  -1    0.35    0.47
   4  -8  -1  300.44    1.73
   4   0   3   -0.19    0.63
   5  -8  -3    0.21    0.89
   5  -8  -2  152.62    1.58
   5  -3   2   78.08    1.27
   5   1   3   25.20    0.87
   6  -7  -3    8.27    0.76
   6  -7  -2    0.08    0.72
   6  -4   1   -0.25    0.76
   7  -5  -3   11.40    0.78
   7  -1   1    0.58    0.76
   7   4   2   18.10    0.84
   4  -7   0  610.80    2.42
   6  -1   2    2.60    0.93
   7   5   2   65.15    1.14
   5  -5   1  621.36    2.82
   5   2   3  338.12    1.99
   7  -4  -1    4.73    0.68
   8   0  -1    0.19    0.49
   4  -8  -2 1327.45    3.40
   4  -3   2   35.47    0.82
   4   1   3   97.54    1.08
   7  -4  -4    0.80    0.54
   5  -7  -1    1.78    0.84
   6  -3   1    2.66    0.84
   6   0   2   54.36    1.18
   4  -5   1  443.65    2.02
   5  -6   0  309.22    2.01
   5   3   3  766.01    2.81
   4   2   3   16.58    0.71
   6  -6  -3   12.28    0.77
   7  -3  -1    0.76    0.73
   5  -7  -2  117.29    1.34
   5  -4   1   19.21    0.97
   6   1   2    3.07    0.78
   4  -7  -1  317.98    1.67
   4  -6   0   56.42    0.90
   5  -7  -3  362.58    2.01
   6  -2   1   73.49    1.30
   7  -1   0   50.01    1.05
   7   2   1    9.87    0.76
   6   2   2   46.14    1.00
   6  -5  -2    3.99    0.79
   6  -1   1    1.03    0.86
   6   3   2    5.35    0.66
   7   0   0    0.68    0.60
   5   0   2   -0.72    0.72
   4  -1   2   68.45    0.87
   6  -4  -1    0.91    0.81
   5  -6  -2  231.99    1.67
   7  -2  -4   10.51    0.67
   7  -2  -2    4.84    0.58
   7  -1  -1   31.95    0.95
   7   1   0   51.32    1.00
   7   7   1    0.31    0.58
   7   8   1    3.98    0.60
   5  -6  -3   24.36    0.84
   6   0   1    0.08    0.82
   4  -3   1    0.40    0.55
  -2 -13   3    9.03    0.42
  -1 -17   6    0.64    0.31
  -2 -14   5   77.68    0.94
  -1 -17   4    0.24    0.28
  -1 -16   7    0.12    0.23
   0 -19   5    6.86    0.37
  -2 -12   7   38.83    0.68
  -2  -3   8   59.51    0.77
  -1 -17   5    9.01    0.45
  -1 -16   3    7.21    0.45
  -2 -13   6    1.32    0.39
  -2  -9   2   15.94    0.43
  -1 -14   8    2.43    0.30
  -2 -13   4  173.90    1.25
  -2  -7   8   26.37    0.68
  -2  -5   8   61.69    0.81
  -2  -4   8   23.10    0.62
  -2 -13   5   62.66    0.87
  -2 -11   7    3.06    0.42
  -2  -6   8   27.65    0.60
  -1 -14   2    1.57    0.41
  -2 -12   6   33.48    0.70
  -2 -11   3    0.17    0.36
  -1 -15   7    0.73    0.29
  -2 -12   4    5.23    0.47
  -2 -10   7   17.68    0.58
  -1 -16   4    1.68    0.38
  -1 -13   8    2.77    0.31
  -2 -12   5   23.73    0.67
  -1 -16   5   14.73    0.57
  -1 -15   3   11.59    0.55
   0 -17   7    0.30    0.19
  -2 -11   6  113.57    1.18
  -2 -10   3   21.69    0.51
  -2  -9   7   53.76    0.86
   0 -18   5   -0.03    0.34
  -2 -11   4  118.75    1.07
  -1 -15   6   43.76    0.79
  -1 -14   7    0.01    0.32
  -1  -7   9   23.70    0.67
  -2 -10   6   12.44    0.65
  -2  -9   3   28.00    0.56
  -2  -7   7   32.04    0.83
  -1  -5   9   12.64    0.51
  -2  -6   7    4.10    0.57
  -1 -15   4    3.41    0.48
  -2   0   5    0.04    0.40
  -1 -15   5   -0.35    0.50
   0 -17   6    9.18    0.53
  -2 -10   5    2.14    0.54
  -2  -9   6   80.00    1.06
  -1 -14   3   46.63    0.73
  -1 -11   8   28.73    0.68
  -1 -13   7    1.75    0.42
  -2  -2   6   10.40    0.53
   0 -17   5    6.93    0.48
   0 -14   8    5.74    0.40
   1 -18   6   -0.23    0.34
  -2  -9   5    1.21    0.54
  -2  -1   5   18.89    0.47
  -1 -12   2    1.39    0.34
  -2  -8   4   10.18    0.48
  -2  -7   6   69.50    0.98
  -2  -3   6  150.93    1.19
  -1 -14   4   98.27    1.10
  -2  -8   5   32.42    0.73
  -2  -5   6   63.61    0.91
  -2  -4   6   25.30    0.64
  -2  -7   4    5.47    0.47
  -2  -2   5  147.45    1.05
  -1 -13   3   69.01    0.85
   0 -16   6   25.80    0.69
   0 -15   7   11.02    0.52
   1 -18   5   39.67    0.80
  -2  -7   5   19.38    0.63
  -2  -6   5   59.53    0.87
  -2  -5   4  239.24    1.32
  -2  -4   5   85.05    0.92
  -2  -3   5  223.02    1.31
  -1 -11   2  495.61    1.75
  -1 -11   7   52.11    1.01
   0 -16   5    3.77    0.61
   0  -9   9    6.37    0.49
  -1 -13   5   30.24    0.85
  -1  -7   8   17.61    0.72
  -1 -12   6   31.57    0.81
  -1  -3   8    1.44    0.62
  -1  -4   8   16.61    0.60
   0 -14   7    1.65    0.43
   0 -12   8   31.22    0.78
   0  -8   9    0.89    0.53
   1 -14   8   25.06    0.67
  -1 -12   5   22.63    0.88
  -1  -9   7   14.61    0.84
   1 -17   5    5.40    0.57
   0 -15   5  135.64    1.50
   0 -11   8   76.28    1.18
   0  -5   9   33.86    0.88
   1 -17   4    0.98    0.59
  -1 -11   3   87.36    0.94
   0 -13   7   14.83    0.66
   0  -4   9   23.67    0.73
  -1  -8   7   35.12    1.01
  -1 -10   6   22.42    0.84
   0 -14   6   18.45    0.76
   1 -16   6   28.04    0.82
   1 -10   9    4.64    0.46
  -1 -11   4   74.78    1.01
   0 -10   8   63.73    1.14
   1 -13   8    6.46    0.47
   2 -17   6    4.42    0.50
  -1  -1   7   16.12    0.73
   0 -14   3  358.71    1.95
   0 -13   2   15.09    0.57
  -1  -6   7   57.86    1.08
   0 -12   7    7.51    0.68
  -1 -10   5   17.04    0.80
  -1  -9   6  161.28    1.65
  -1  -2   7  142.98    1.38
   0 -14   5    0.99    0.65
   0  -9   8  156.31    1.71
  -1 -10   4   12.57    0.67
  -1  -4   7    1.05    0.57
  -1  -3   7   12.99    0.69
   0 -13   6   51.62    1.16
   1 -16   5   24.84    0.79
   1 -14   7    3.10    0.50
   2 -17   5    8.52    0.68
  -1  -9   3  168.83    1.25
  -1  -8   6   10.73    0.81
   1 -15   6   12.82    0.83
   0 -11   7    0.56    0.61
  -1  -7   6   24.60    0.90
   2 -15   7    0.62    0.43
  -1  -9   4   23.82    0.72
   0 -13   3  617.63    2.57
   0 -12   2    7.10    0.45
   0  -7   8    6.06    0.80
   2 -16   6    4.68    0.62
   2 -13   8    6.62    0.50
  -1  -8   5   24.89    0.82
  -1  -6   6   76.14    1.17
  -1   0   6    0.36    0.53
   0 -12   6   22.05    0.89
   1 -11   8   99.71    1.42
   0 -13   4   38.09    0.93
   0 -10   7   18.15    0.84
   1 -15   5    0.50    0.74
   1 -13   7   62.08    1.20
  -1  -8   4   91.67    1.09
  -1  -5   6  119.65    1.35
  -1  -1   6    3.45    0.53
   0  -5   8   19.07    0.95
   1 -15   3  310.24    1.96
  -1  -7   5  102.56    1.25
  -1  -4   6   24.59    0.76
  -1  -3   6  108.64    1.24
  -1  -2   6  100.03    1.14
   0  -4   8   19.18    0.88
   0  -3   8   19.82    0.82
   0  -2   8   21.65    0.88
   1 -15   4  112.87    1.41
   1 -10   8  125.95    1.61
   3 -16   6    3.24    0.50
   0 -12   5  126.60    1.54
   0 -11   6  199.40    1.98
   0  -9   7   71.49    1.30
   2 -16   5   80.15    1.26
  -1  -7   4    3.13    0.60
  -1  -6   5   30.91    0.81
   0 -12   3   28.73    0.70
   1 -12   7    0.51    0.77
   0 -12   4  204.68    1.73
   2 -16   4    6.27    0.76
   2 -15   6    2.22    0.61
  -1  -5   5  103.09    1.20
   0  -8   7    2.76    0.85
  -1  -6   4   13.27    0.70
   0 -10   6   64.05    1.38
   1 -14   5    1.00    0.73
  -1  -3   5  176.04    1.38
  -1  -2   5  325.72    1.83
   0 -11   5  118.12    1.52
   2 -11   8    0.34    0.46
   0  -7   7  125.46    1.70
   1 -14   3 1199.04    3.83
   3 -14   7    4.18    0.49
   0 -11   3   94.10    1.13
   1 -14   4  273.08    2.12
   1 -11   7    5.74    0.79
   1  -8   8   47.14    1.12
   0  -9   6  282.61    2.32
   2 -15   5    9.15    0.86
   3 -15   6    1.69    0.64
   0 -10   5   77.46    1.31
   1 -13   2   95.22    1.20
   1 -12   6  151.72    1.91
   1 -13   5   66.24    1.32
   3 -11   8   37.16    1.01
   0  -8   6  135.01    1.71
   0   0   7    0.08    0.69
   2 -12   7   32.03    1.10
   2  -3   9    3.16    0.64
   0  -3   7   10.62    0.86
   0 -10   3   75.56    1.02
   0 -10   4   17.96    0.80
   0  -2   7   88.92    1.32
   0  -1   7  188.03    1.76
   1 -13   4    2.36    0.89
   0  -9   5  143.80    1.63
   1 -13   3   45.46    0.95
   1  -5   8   12.14    0.93
   0  -7   6  556.58    3.07
   1 -11   6   58.73    1.29
   1  -9   7  340.37    2.67
   1  -4   8    7.14    0.97
   2 -14   5   44.68    1.25
   3 -14   6    1.90    0.73
   3 -10   8   46.68    1.10
   1  -3   8    6.23    0.75
   1  -1   8   12.79    1.05
   2 -11   7  121.54    1.75
   0  -9   4  233.24    1.83
   0  -6   6   18.54    0.94
   3 -12   7    3.51    0.73
   4 -14   6    3.22    0.55
   0  -8   5   34.45    1.00
   1 -12   2   48.99    0.87
   1  -8   7  427.75    3.09
   3  -3   9    0.21    0.50
   1 -10   6   84.04    1.53
   2 -14   4   17.02    0.94
   3 -15   4   16.76    0.98
   2 -14   3   56.49    1.19
   2  -7   8  236.99    2.43
   1  -7   7   92.04    1.64
   2 -10   7  377.40    3.09
   0  -7   5   64.14    1.15
   0  -4   6  107.49    1.46
   1 -11   5  841.59    3.84
   3 -13   6   11.61    0.84
   0  -8   4  327.52    2.06
   0  -3   6   43.95    1.01
   0   1   6  139.79    1.54
   1  -9   6  304.52    2.64
   0  -2   6   38.07    0.96
   0   0   6   14.80    0.81
   1  -6   7   21.28    1.18
   4 -13   6    0.14    0.71
   0  -6   5   30.88    0.93
   0  -1   6  137.24    1.45
   2  -9   7    2.75    0.86
   2  -5   8    6.86    0.92
   1 -11   4   19.16    0.92
   2 -13   4  182.56    1.96
   2 -11   6   43.59    1.28
   4 -11   7    7.71    0.67
   4  -8   8    5.92    0.63
   0  -7   4  556.94    2.61
   1 -10   5   95.19    1.52
   3  -7   8   -0.23    0.61
   0  -5   5   12.85    0.79
   1 -11   3   56.25    1.09
   1  -8   6  424.31    2.93
   2 -12   5  116.28    1.71
   3 -10   7  113.07    1.73
   2 -13   3  121.60    1.59
   2  -8   7   20.04    1.06
   4  -7   8   44.61    1.09
   0  -6   4 1332.14    3.85
   0  -4   5  357.24    2.19
   1  -3   7   16.25    1.00
   1  -9   5   89.61    1.47
   1  -7   6  421.96    2.90
   1  -2   7   72.43    1.47
   2 -10   6  137.45    1.90
   4 -12   6    1.16    0.68
   4 -10   7   23.68    0.97
   1  -1   7   15.73    1.02
   1   1   7   15.10    1.03
   3  -9   7  117.15    1.93
   5 -13   5    1.07    0.57
   0  -3   5  142.67    1.43
   2  -7   7   55.27    1.35
   4  -6   8   14.79    0.83
   3 -11   6    1.22    0.75
   0  -2   5    2.38    0.69
   1  -6   6   20.10    1.10
   1 -10   3   55.15    0.98
   2  -9   6  124.73    1.88
   3 -13   4    1.12    0.70
   4  -5   8   15.56    0.86
   1  -8   5   36.32    1.13
   2  -6   7   16.76    1.20
   3 -12   5    4.85    0.97
   3  -8   7   58.79    1.49
   5 -11   6    9.90    0.62
   2 -12   2   25.68    1.01
   2 -12   3   15.84    0.87
   1  -9   4    0.71    0.72
   1  -5   6   21.60    1.10
   2  -5   7    1.01    1.06
   3 -13   3   88.19    1.46
   3 -10   6   19.85    1.04
   5  -8   7    0.30    0.59
   2  -8   6  148.07    2.06
   3   0   8   -0.62    0.78
   4 -13   4   25.87    1.10
   4 -12   5   14.33    1.15
   1  -7   5  306.30    2.29
   2 -11   4   78.90    1.44
   3  -7   7   24.91    1.14
   4  -3   8   13.78    0.86
   1  -9   3   12.38    0.82
   3 -11   5   61.18    1.50
   4 -10   6    4.35    0.74
   1  -8   4   21.23    0.92
   1  -3   6    1.37    0.85
   5  -7   7   53.32    1.24
   2  -7   6  207.48    2.32
   2  -3   7    7.87    1.05
   3  -9   6   51.90    1.36
   3  -6   7    3.31    0.88
   4  -7   7   -0.38    0.64
   1  -2   6    3.87    0.95
   2 -11   3    6.36    0.74
   2  -9   5  194.94    2.12
   4   1   8    6.21    0.77
   2  -2   7    1.61    0.97
   1  -1   6   13.13    0.97
   2 -11   2   25.42    0.90
   2  -1   7    8.28    0.97
   3 -12   3   25.35    1.07
   4 -12   4   55.52    1.34
   4  -9   6   69.06    1.47
   5 -12   4    6.26    0.86
   5  -9   6    3.12    0.70
   1  -5   5  359.54    2.40
   1   1   6   11.92    0.90
   1   2   6    3.48    0.92
   2   0   7    0.43    0.89
   2   1   7    9.27    1.16
   2   2   7    2.46    1.03
   3  -8   6    0.58    0.84
   6 -11   4   29.22    1.08
   2  -8   5   55.27    1.38
   3 -11   4   59.07    1.36
   2  -5   6    8.58    1.09
   1  -4   5   34.25    1.06
   3  -7   6   60.09    1.48
   4  -8   6   99.56    1.77
   5 -10   5   13.01    0.93
   1  -6   4  305.07    2.06
   4 -12   3   25.35    1.13
   3  -9   5   26.78    1.30
   4  -4   7   21.18    1.05
   5  -4   7   35.06    1.14
   6  -9   5    1.12    0.44
   1  -3   5  186.35    1.75
   3  -2   7    0.23    0.99
   4 -11   4  136.43    1.87
   2 -10   2  167.80    1.46
   3 -11   3   20.70    0.94
   3 -10   4   47.50    1.32
   3  -6   6    5.23    0.99
   3  -1   7   58.12    1.46
   5  -7   6    2.10    0.84
   5  -3   7   48.43    1.27
   6 -10   4    6.29    0.86
   6  -6   6    4.21    0.62
   3   0   7    2.68    1.02
   1  -5   4 2199.22    5.12
   1  -2   5   64.33    1.21
   3   1   7   56.37    1.38
   4  -9   5   47.08    1.43
   5  -9   5   29.35    1.16
   2  -8   4   22.03    0.98
   2  -6   5  227.24    2.13
   3  -8   5   83.66    1.68
   3   2   7    0.22    1.05
   3   3   7   -0.68    0.93
   6  -8   5    0.84    0.66
   2  -2   6  141.80    1.93
   3 -11   2   86.12    1.27
   1  -1   5    5.95    0.72
   3  -5   6    1.44    1.14
   4  -6   6    7.31    1.01
   4  -1   7   14.82    1.17
   5  -6   6   11.90    0.96
   5  -1   7   47.19    1.28
   6  -5   6   -1.49    0.61
   4 -11   3   13.37    0.94
   4 -10   4   16.87    1.05
   4   0   7   -1.30    0.89
   5   0   7   40.70    1.30
   2  -5   5   51.43    1.25
   4  -8   5   60.62    1.57
   4   1   7   14.99    1.15
   5   1   7   51.43    1.36
   6  -9   4   36.51    1.22
   2   0   6  254.56    2.19
   3  -7   5  223.97    2.33
   3  -4   6    4.89    1.16
   4   2   7    9.35    1.03
   4   3   7   46.27    1.30
   4   4   7   22.81    1.07
   5   2   7   84.39    1.66
   5   3   7   49.34    1.34
   6  -4   6    6.14    0.70
   2  -7   4   10.63    0.90
   4  -5   6    3.31    0.94
   5  -5   6   -0.20    0.67
   2   2   6  140.39    1.68
   2   3   6  132.85    1.72
   3  -3   6    8.70    1.40
   4 -11   2   69.28    1.36
   4  -9   4   12.37    1.25
   6  -3   6    1.27    0.64
   4  -7   5   62.79    1.53
   4  -4   6   10.06    0.97
   3  -8   4    5.19    0.92
   3  -6   5   85.91    1.66
   4 -10   3    1.28    0.77
   5  -7   5   38.55    1.24
   2  -6   4  219.76    1.89
   6  -2   6    3.24    0.72
   4  -3   6    8.81    1.03
   5  -3   6   25.40    1.13
   6  -9   3   13.96    0.95
   6  -1   6   87.19    1.61
   4  -6   5    3.85    0.97
   5  -6   5   31.48    1.21
   6  -5   5    7.76    0.84
   3   0   6   -1.20    1.13
   4  -2   6   14.57    1.19
   5  -8   4    3.87    1.01
   6   0   6    8.07    0.83
   2  -2   5   14.11    0.87
   6  -7   4    7.48    1.02
   2  -5   4  127.07    1.50
   3   1   6  252.27    2.41
   4 -10   2    4.99    0.89
   5 -10   2    0.50    0.99
   7  -5   4   -0.29    0.47
   3  -4   5   36.18    1.27
   4  -5   5    3.03    0.97
   5  -5   5    5.49    1.15
   3  -8   3    5.08    0.73
   3   4   6    3.23    0.99
   6   3   6    2.07    0.77
   6   4   6    5.37    0.73
   6  -9   2   29.03    1.21
   6  -8   3    6.03    0.86
   3  -6   4   15.70    0.97
   4   1   6    6.76    1.04
   5   1   6   36.35    1.26
   6  -3   5   10.47    0.90
   7  -4   4    8.08    0.74
   3  -3   5    0.31    0.92
   7  -6   3    1.42    0.73
   4   2   6   13.56    1.02
   2   1   5   11.06    0.79
   4   5   6    3.20    1.16
   5   5   6   -0.10    0.80
   6  -2   5   60.85    1.42
   2  -3   4  939.32    3.34
   2   2   5   12.41    0.78
   3  -2   5   95.78    1.52
   4  -6   4    0.58    0.97
   6  -7   3   12.44    1.06
   6  -5   4    7.62    0.90
   7  -3   4    6.08    0.73
   2   3   5    0.77    0.76
   3  -5   4  234.93    2.01
   5  -3   5   42.90    1.31
   2   4   5  129.20    1.40
   3  -8   2   41.10    0.93
   6  -8   2   87.65    1.53
   3  -1   5   69.42    1.34
   7  -2   4    0.62    0.59
   4  -2   5   12.98    1.19
   5  -2   5  228.13    2.41
   2  -2   4  252.52    1.76
   4  -9   1    7.48    0.85
   4  -5   4   53.57    1.35
   5  -5   4   -0.17    1.02
   6  -4   4   50.72    1.28
   6   0   5    0.24    0.71
   7  -6   2    8.75    0.79
   3  -4   4  320.85    2.22
   6  -6   3   22.58    1.10
   3  -6   3  259.63    1.90
   5  -1   5   -0.39    0.80
   6   1   5  250.53    2.51
   4  -1   5  154.67    1.97
   3   1   5   66.40    1.25
   6   2   5   71.21    1.43
   6   8   5    0.31    0.62
   2  -1   4   26.54    0.80
   5   0   5  725.75    4.00
   3  -7   2  221.85    1.64
   4  -4   4    4.75    0.98
   4   0   5   -0.35    0.94
   6   7   5    0.07    0.68
   3  -3   4   42.28    1.01
   3   2   5   94.33    1.34
   5  -6   3   20.68    1.07
   6  -5   3  103.18    1.81
   6   4   5    9.45    0.84
   6   5   5    7.43    0.85
   7  -5   2   60.00    1.35
   5   1   5   -0.60    0.95
   7  -6   1    3.23    0.79
   7   1   4   33.05    0.99
   3   3   5    1.07    0.74
   3   4   5   32.38    0.93
   3   6   5   86.43    1.31
   7   2   4    0.67    0.52
   3   5   5   20.68    0.91
   4  -3   4   10.51    0.97
   5  -8   1    2.39    0.81
   3  -2   4   33.28    0.93
   4  -7   2    6.07    0.62
   5   3   5   43.42    1.26
   7   3   4    7.62    0.70
   4  -5  -1    0.48    0.15
   5  -9  -7    1.30    0.15
   4   0  -3    0.07    0.19
   3   2  -7   81.59    0.49
   5  -9  -3    4.19    0.24
   5  -8  -3    0.53    0.21
   5  -5  -4   78.13    0.49
   3   3  -4    0.16    0.17
   5  -5  -5    4.88    0.25
   3   3  -5    0.17    0.23
   5 -11  -6    5.21    0.19
   3   0  -8    0.06    0.24
   4   0  -4    2.33    0.27
   5 -11  -4    0.16    0.26
   5 -10  -6   -0.02    0.20
   5  -9  -6    0.22    0.21
   5  -6  -5    1.22    0.23
   5 -11  -5    9.81    0.31
   5 -10  -4   13.46    0.33
   5  -8  -4    0.07    0.33
   5  -7  -4    9.98    0.34
   5 -10  -5    1.14    0.30
   5  -9  -4   17.68    0.33
   4  -5  -8    3.05    0.22
   5  -9  -5   30.48    0.38
   3   2  -6    0.27    0.29
   4  -1  -6   79.70    0.55
   2   4  -5   81.30    0.40
   3  -4  -9   16.12    0.31
   4  -6  -8   16.06    0.30
   3  -1  -8  351.97    1.06
   4  -2  -3    4.68    0.26
   4  -1  -4    8.76    0.33
   3   2  -5   34.90    0.39
   3  -5  -9    6.20    0.26
   4  -9  -8    4.76    0.24
   4  -8  -8    1.19    0.21
   4  -2  -6  319.06    1.00
   3   1  -3    0.25    0.21
   4  -3  -3    5.48    0.36
   4  -2  -4    0.54    0.34
   3  -6  -9    0.74    0.16
   3  -2  -8   75.92    0.61
   3   1  -6    1.08    0.38
   4  -2  -5   10.34    0.41
   2   2  -7   39.71    0.45
   2   3  -6  152.86    0.62
   4  -6  -2   27.46    0.33
   4  -5  -7   17.52    0.36
   4  -3  -6  470.51    1.23
   3   1  -4    0.47    0.24
   4  -6  -7   12.52    0.40
   4  -4  -3    1.40    0.32
   3   1  -5    1.59    0.31
   4 -10  -2   17.67    0.40
   4  -9  -2 1326.78    1.66
   4  -8  -2 1337.54    1.60
   4  -7  -7   53.50    0.53
   3  -1  -7  122.56    0.71
   4 -11  -7    0.76    0.26
   4 -10  -7    0.30    0.23
   4  -9  -7    1.53    0.26
   4  -5  -6    0.10    0.33
   4 -15  -5  102.54    0.64
   4 -14  -6    5.25    0.33
   2  -4  -9   20.70    0.41
   2   1  -7  120.69    0.67
   4 -13  -6   30.06    0.46
   4 -13  -3    9.60    0.47
   2  -1  -8    2.27    0.42
   4 -14  -5  118.63    0.71
   4 -14  -4   44.61    0.54
   4  -7  -6   55.39    0.58
   4 -12  -6   22.76    0.38
   4 -12  -3   43.72    0.52
   3  -1  -3    0.31    0.27
   4 -11  -3  552.40    1.28
   4 -10  -6    0.17    0.36
   4  -8  -3   55.69    0.51
   2  -5  -9    0.04    0.32
   4 -13  -5  146.51    0.78
   4 -13  -4  130.74    0.70
   4 -10  -3  447.55    1.14
   4  -9  -3   48.11    0.47
   2   2  -5  152.44    0.59
   4 -12  -5   30.91    0.57
   4  -7  -5    4.20    0.45
   3  -7  -8    1.24    0.29
   4 -12  -4   10.18    0.37
   4 -11  -5   21.05    0.56
   2  -6  -9    6.12    0.35
   2  -2  -8   89.23    0.63
   2   0  -7    0.12    0.41
   3  -8  -8    6.94    0.33
   4 -11  -4   28.96    0.46
   4 -10  -4  168.20    0.88
   4  -9  -4   47.83    0.56
   3 -11  -8    0.36    0.26
   3  -9  -8    0.06    0.26
   3  -2  -6   -0.17    0.45
   2  -7  -9    0.08    0.33
   2   1  -6   30.28    0.43
   3  -4  -7  104.94    0.78
   2  -8  -9    1.59    0.25
   3  -2  -3  318.36    0.82
   2  -3  -8   59.73    0.61
   3  -5  -7    2.73    0.42
   3  -3  -6  147.92    0.83
   2  -1  -7  112.36    0.74
   1  -4  -9   13.48    0.48
   2   1  -5   19.86    0.35
   3 -14  -7   15.82    0.38
   3  -6  -7   26.26    0.51
   2  -4  -8   22.26    0.50
   2   0  -6    6.31    0.36
   3 -13  -7   45.38    0.52
   3  -7  -7   21.66    0.52
   3 -12  -7   34.40    0.51
   3  -8  -7    9.84    0.54
   3  -3  -5    0.15    0.43
   1  -5  -9   16.71    0.44
   3 -11  -7    5.46    0.35
   3  -9  -7   43.74    0.60
   2  -5  -8   68.34    0.68
   2  -2  -7   41.30    0.57
   3  -4  -3  307.36    0.86
   3  -6  -2   48.59    0.43
   1  -2  -8   -0.32    0.50
   2  -6  -8   28.01    0.56
   2   0  -5    0.23    0.29
   3 -14  -6   24.82    0.49
   3  -6  -6    5.67    0.49
   2  -1  -6   30.74    0.49
   1  -7  -9   21.95    0.53
   1   0  -7  361.47    1.13
   2 -13  -8   23.65    0.43
   3  -7  -6   51.00    0.65
   3  -7  -2    3.08    0.33
   3  -5  -5  404.48    1.24
   1  -8  -9   22.76    0.49
   2 -12  -8    0.31    0.33
   2  -8  -8   35.09    0.56
   2  -9  -8   21.28    0.52
   3 -15  -4   10.67    0.51
   3 -12  -2   16.23    0.47
   3  -8  -2   23.61    0.38
   1 -10  -9    0.28    0.23
   2 -10  -8    2.19    0.34
   3 -14  -5    8.24    0.45
   3  -9  -2   18.41    0.38
   3  -6  -5  129.06    0.84
   3 -14  -3   -0.09    0.44
   3 -10  -2   71.38    0.51
   3 -13  -5   17.23    0.52
   3  -6  -4  132.61    0.72
   3 -13  -3    0.48    0.49
   3  -8  -5   34.99    0.72
   1  -1  -7   13.80    0.47
   3 -13  -4   22.91    0.52
   3 -12  -5  214.80    1.05
   3  -9  -5  135.33    0.97
   3  -7  -4  378.39    1.14
   1  -4  -8   14.61    0.45
   3 -10  -5   29.91    0.63
   3  -8  -3  115.41    0.64
   0  -6  -9   16.78    0.44
   3 -12  -4   53.06    0.62
   3  -9  -3   59.67    0.53
   3  -8  -4   95.51    0.70
   2  -6  -7    4.02    0.55
   3 -11  -4   76.83    0.69
   3 -10  -4   55.82    0.64
   0  -7  -9    5.58    0.39
   1  -5  -8   -0.18    0.41
   1   0  -6    0.18    0.33
   2  -7  -7   31.86    0.63
   1  -2  -7  125.23    0.83
   0  -8  -9    1.20    0.36
   1  -6  -8    1.02    0.54
   2 -11  -7    2.93    0.52
   0 -10  -9   12.60    0.40
   0  -9  -9    6.67    0.38
   2 -10  -7   13.55    0.51
   2  -2  -4  199.94    0.72
   1  -7  -8   15.19    0.54
   1 -12  -8   21.91    0.48
   1  -8  -8   14.80    0.52
   1  -3  -7   12.13    0.54
   1 -17  -7    0.33    0.22
   1 -11  -8   22.87    0.49
   1  -1  -6    2.88    0.41
   2 -14  -6    1.82    0.35
   2  -6  -6    4.56    0.54
   1   0  -5    1.35    0.30
   2  -3  -4   66.09    0.50
   2 -13  -6    0.90    0.39
  -1  -8  -9    5.87    0.35
   1 -16  -7    0.03    0.29
   2  -8  -6    1.74    0.59
  -1  -9  -9    0.49    0.30
   1 -15  -7    0.82    0.29
   1  -5  -7    0.76    0.49
   2  -6  -5   47.51    0.58
   0 -14  -8    5.20    0.34
   0  -6  -8   -0.52    0.47
   0 -13  -8   38.86    0.53
   1 -13  -7    1.64    0.38
   2  -8  -5   26.82    0.58
   1 -12  -7    2.62    0.44
   2 -14  -4   -0.02    0.42
   2 -11  -5    1.41    0.53
   2 -10  -5    1.73    0.51
   2  -9  -5    1.41    0.52
   0 -12  -8   29.35    0.50
   0  -8  -8   13.37    0.51
   1 -10  -7   13.17    0.48
   1  -9  -7   12.10    0.52
   0 -17  -7    0.57    0.27
   0  -9  -8  139.21    0.90
   1 -19  -4    8.50    0.46
   1 -18  -5    1.29    0.41
   2 -14  -3    2.68    0.40
   0 -19  -6   12.97    0.33
   2 -13  -3    7.89    0.41
  -1  -5  -8   10.54    0.52
   1 -17  -5    9.14    0.45
  -1 -14  -8   16.70    0.38
   0  -4  -7   12.71    0.49
   1 -14  -6    8.86    0.44
   2 -11  -3    0.01    0.30
   2 -10  -3   20.65    0.43
  -1  -6  -8   11.54    0.48
   0 -15  -7   11.43    0.41
   1  -6  -6   67.93    0.67
   0 -18  -6    0.62    0.35
   1 -13  -6   30.05    0.54
  -1  -7  -8    0.93    0.41
   1 -16  -5   15.03    0.51
   1  -7  -6   21.40    0.56
  -1 -11  -8   95.25    0.76
  -1  -8  -8   45.35    0.58
   1 -17  -4    0.29    0.41
   1 -11  -6    0.23    0.44
   1 -10  -6   20.06    0.55
   1  -9  -6  146.30    0.94
   1  -8  -6   11.14    0.55
  -1 -17  -7    2.34    0.30
  -1 -10  -8  112.70    0.81
  -1  -9  -8    0.69    0.38
   0 -13  -7   12.88    0.49
   0  -2  -6   32.00    0.47
   1 -15  -5   -0.28    0.57
   0 -19  -5    8.76    0.42
   0 -17  -6    9.13    0.38
   0 -12  -7    7.12    0.45
   0 -11  -7    0.36    0.40
  -1 -16  -7   10.10    0.36
   0 -10  -7   15.90    0.50
   0  -9  -7   70.62    0.75
   1  -5  -5   95.63    0.60
  -1  -3  -7   15.95    0.47
  -2 -12  -8    2.27    0.28
  -2  -7  -8  230.55    1.06
   0  -3  -6   39.96    0.47
   1 -13  -5   28.11    0.59
   1  -6  -5   29.00    0.45
  -2 -11  -8   -0.18    0.35
  -2  -8  -8   43.81    0.59
   0 -18  -5   -0.23    0.38
  -2 -10  -8    1.40    0.38
  -2  -9  -8  192.35    1.02
  -1 -15  -7    5.21    0.30
   1 -16  -3    8.68    0.45
   1 -15  -4    3.75    0.44
   1 -12  -5   24.29    0.59
   1  -7  -5   95.75    0.64
   0 -19  -4    0.22    0.38
   0 -15  -6    5.25    0.41
   1 -11  -5    5.61    0.50
   1  -8  -5   23.58    0.48
  -1 -18  -6   -0.02    0.25
   0  -4  -6  104.74    0.64
   1 -10  -5   17.16    0.53
   1  -9  -5    0.75    0.43
  -1 -21  -4   26.40    0.47
  -1 -14  -7    2.80    0.29
   1 -14  -4  100.03    0.73
  -3  -9  -8   23.61    0.43
  -2 -16  -7    3.03    0.26
  -1 -13  -7   61.23    0.67
  -1  -5  -7  119.80    0.75
   0  -5  -6   20.78    0.45
   1 -15  -3   14.04    0.41
   1  -5  -4 1172.33    1.56
   1 -13  -4  151.18    0.82
  -1 -17  -6    1.60    0.27
  -1 -12  -7    0.50    0.40
  -1  -6  -7   20.70    0.46
   0 -19  -3    0.24    0.36
   0 -18  -4   12.71    0.45
   1 -15  -2    7.09    0.39
  -1 -19  -5    0.41    0.36
   1  -6  -4   16.19    0.35
  -2 -15  -7   -0.14    0.26
  -1 -11  -7    6.11    0.37
  -1  -7  -7   96.35    0.70
   0 -11  -6  204.36    0.99
   0  -7  -6  535.71    1.37
   1 -14  -3   60.42    0.56
  -1  -9  -7  351.09    1.25
  -1  -8  -7  444.72    1.38
   0 -10  -6   65.86    0.69
   0  -9  -6  283.89    1.14
   0  -8  -6  140.07    0.81
   1 -11  -4   78.64    0.60
  -1 -20  -4    3.33    0.34
  -1 -16  -6   29.20    0.46
   1 -14  -2    1.42    0.33
   1 -10  -4   13.53    0.39
   1  -9  -4   25.11    0.40
  -2 -14  -7    6.53    0.33
  -1  -2  -6    4.45    0.28
   0 -15  -5  141.46    0.85
  -2  -4  -7   10.42    0.45
   0 -18  -3   96.03    0.69
   0 -17  -4   27.44    0.47
   0  -3  -5  157.49    0.63
  -1 -18  -5   37.88    0.50
  -2 -13  -7    6.92    0.33
   0 -14  -5    0.91    0.41
  -1  -3  -6    1.22    0.30
   0 -16  -4    1.28    0.43
   0  -4  -5  392.01    0.93
  -1 -20  -3   50.74    0.53
  -1 -19  -4   26.33    0.42
  -1 -14  -6   38.16    0.53
   1 -12  -2    1.25    0.26
  -2 -11  -7  130.84    0.81
  -2  -6  -7   17.33    0.41
  -3 -13  -7   19.49    0.41
  -2  -7  -7   56.65    0.53
  -2 -16  -6    3.62    0.26
  -1  -4  -6    1.08    0.29
   0 -15  -4    4.64    0.38
   0 -11  -5  122.71    0.73
   0  -6  -5   33.19    0.38
  -3 -12  -7    5.26    0.31
  -2 -20  -4   11.73    0.32
  -1 -12  -6  141.08    0.81
   0 -10  -5   78.92    0.61
  -1 -18  -4    0.39    0.36
  -1 -16  -5   24.79    0.42
  -1  -5  -6   21.89    0.36
   0 -17  -2    0.95    0.33
   0  -9  -5  151.60    0.71
   0  -8  -5   38.05    0.43
   0  -7  -5   66.53    0.49
  -3 -11  -7   25.20    0.42
  -3  -6  -7    3.71    0.36
  -2 -18  -5   50.79    0.52
  -2 -15  -6    2.24    0.25
  -1 -11  -6   57.07    0.57
  -1  -6  -6   23.78    0.45
   0 -16  -3  116.13    0.64
  -3 -10  -7  118.43    0.73
  -1 -19  -3    5.07    0.31
  -1 -10  -6   86.94    0.67
  -3 -16  -6    2.95    0.25
  -3  -9  -7  132.82    0.76
  -3  -8  -7   62.30    0.56
  -3  -7  -7   24.13    0.43
  -4  -9  -7    1.27    0.24
  -1 -15  -5    0.06    0.28
  -2 -14  -6    0.52    0.26
  -2 -19  -4    7.02    0.31
  -1 -17  -4    1.06    0.32
  -2 -17  -5    9.13    0.29
   0 -16  -2  439.68    1.06
  -3 -15  -6    1.42    0.20
  -2 -20  -3    5.18    0.28
  -2 -13  -6    7.85    0.35
  -1 -19  -2    0.16    0.27
  -1 -14  -5    0.24    0.31
   0 -12  -4  224.03    0.80
  -1 -18  -3   79.47    0.53
  -4 -15  -6    1.54    0.17
   0 -14  -3  404.10    1.01
   0 -11  -4    6.31    0.29
  -2 -12  -6   27.06    0.40
  -1 -13  -5   65.74    0.54
  -3 -14  -6    1.88    0.23
   0 -15  -2  125.39    0.57
   0 -10  -4   18.75    0.30
  -2 -18  -4   13.06    0.31
  -2 -11  -6   47.22    0.50
  -1  -3  -5  195.57    0.58
   0  -9  -4  242.71    0.71
   0  -6  -4 1441.35    1.47
  -3 -19  -4    0.83    0.19
  -3 -17  -5   16.48    0.30
  -2 -10  -6  144.98    0.76
   0 -13  -3  655.87    1.18
   0  -8  -4  333.64    0.77
   0  -7  -4  604.38    0.99
  -3 -13  -6    7.20    0.27
  -2 -20  -2   25.86    0.35
  -1 -17  -3   16.65    0.34
  -2 -19  -3   30.65    0.39
  -2  -8  -6  153.59    0.68
  -1  -4  -5   30.57    0.29
  -3 -20  -3   33.61    0.36
  -3 -12  -6    9.78    0.26
   0 -14  -2    7.88    0.22
  -2 -14  -5   40.55    0.42
  -3 -10  -6   21.29    0.38
  -3  -4  -6    4.11    0.24
   0 -14  -1    0.39    0.21
  -5 -10  -6   53.41    0.44
  -4 -11  -6    4.86    0.26
  -2 -18  -3    0.80    0.25
   0 -13  -2   16.10    0.22
   0 -10  -3   77.29    0.38
  -4 -18  -4   23.29    0.31
  -3  -5  -6    2.09    0.22
  -2 -19  -2    4.76    0.22
  -2 -16  -4    6.68    0.31
  -2 -13  -5  199.15    0.75
  -1 -13  -4    0.81    0.25
  -5  -9  -6    2.52    0.18
  -4 -10  -6    4.28    0.25
  -3 -19  -3   34.23    0.34
  -3  -8  -6    1.24    0.21
  -3  -7  -6   62.96    0.42
  -3  -6  -6    4.62    0.23
   0  -9  -3   81.56    0.34
  -3 -20  -2    1.87    0.16
  -4 -15  -5    0.99    0.14
  -4  -9  -6   65.14    0.46
  -3 -17  -4    7.36    0.21
  -2 -12  -5  110.08    0.55
  -1 -15  -3  332.64    0.83
  -1 -12  -4  179.85    0.61
   0 -12  -2    6.50    0.17
  -4  -6  -6    7.62    0.26
  -3 -14  -5    4.71    0.22
  -5 -14  -5    0.03    0.11
  -4  -7  -6    1.94    0.18
  -2 -15  -4    0.20    0.24
  -2 -17  -3   43.48    0.36
  -2 -11  -5    0.39    0.24
  -1 -16  -2    3.08    0.19
  -1 -11  -4   16.65    0.25
  -3 -13  -5    0.12    0.17
  -2 -18  -2   17.96    0.24
  -2 -10  -5   18.77    0.28
  -2  -3  -5    1.18    0.13
  -1 -14  -3 1066.10    1.35
  -1 -10  -4   38.57    0.28
  -3 -19  -2    0.13    0.16
  -2  -4  -5  123.96    0.41
  -1  -9  -4    0.87    0.14
  -2 -16  -3    1.44    0.18
  -5 -12  -5    0.62    0.11
  -5 -11  -5    0.97    0.12
  -1 -12  -3    0.52    0.13
   1 -11   4   20.06    1.11
   3  -9   6   51.68    1.50
   3 -16   4    3.40    0.82
   1 -15   1   39.79    1.21
   2 -11   5    0.38    1.20
   3  -8   6    1.19    1.00
   4 -18   3   13.78    0.97
   5 -14   5    0.23    0.64
   1 -10   4   39.53    1.15
   3  -3   6    8.45    1.06
   3  -7   6   61.07    1.43
   3  -6   6    5.12    1.05
   3  -4   6    4.79    1.11
   5  -9   6    2.97    0.84
   1 -14   2   69.01    1.29
   2 -10   5   19.80    1.25
   3  -5   6    1.11    0.94
   4 -16   4   93.15    1.76
   4  -9   6   67.40    1.63
   1  -9   4    1.72    0.84
   2 -15   3  241.06    2.53
   2 -13   4  184.89    2.30
   3 -15   4   13.78    1.05
   4  -8   6   96.79    1.76
   5 -13   5    1.34    0.72
   2  -9   5  193.02    2.16
   4 -13   5    7.25    0.88
   4  -7   6    1.75    1.00
   5  -7   6    2.61    0.83
   1  -8   4   23.60    1.01
   5 -17   3    2.70    0.57
   1 -14   1  229.80    1.89
   2  -8   5   52.20    1.38
   4  -6   6    7.78    0.89
   4  -4   6    9.98    1.14
   5  -5   6    0.71    0.85
   1 -13   2   92.95    1.30
   1 -11   3   56.55    1.19
   1  -6   4  294.25    2.00
   2  -2   5   13.07    0.79
   3 -14   4   56.28    1.43
   4 -15   4   58.90    1.46
   4 -12   5   17.78    1.18
   5 -12   5    0.64    0.66
   2  -6   5  227.59    2.09
   2  -5   5   50.90    1.14
   2  -4   5  127.17    1.51
   1 -10   3   52.68    1.15
   2 -15   2    0.52    0.98
   2 -11   4   76.86    1.61
   4 -18   1   37.61    1.23
   4 -11   5   39.52    1.45
   1 -12   2   48.24    1.03
   1 -13   1    3.12    0.68
   3  -9   5   26.63    1.36
   6  -9   5    0.82    0.52
   2 -13   3  121.28    1.88
   4 -17   2   17.71    1.03
   1  -9   3   15.45    0.92
   3 -16   2    5.56    0.93
   6  -8   5    0.51    0.86
   1 -11   2   20.95    0.89
   3  -7   5  213.53    2.30
   4 -13   4   24.79    1.23
   5 -13   4   30.37    1.06
   6 -12   4   14.28    0.87
   1  -8   3   26.13    0.88
   2  -9   4   19.11    1.06
   5 -15   3    0.13    0.67
   2 -12   3   17.10    1.09
   3 -14   3   41.43    1.49
   3  -6   5   84.62    1.55
   1 -12   1  211.25    1.65
   4 -17   1   -0.10    0.89
   4  -8   5   62.13    1.75
   6 -14   3   23.94    0.94
   3 -11   4   58.55    1.61
   3  -5   5   20.81    1.03
   3  -4   5   34.02    1.18
   4 -16   2  185.93    2.24
   3 -15   2   40.95    1.45
   4 -12   4   54.56    1.46
   5 -12   4    5.65    0.86
   6 -11   4   40.43    1.17
   4  -7   5   63.38    1.52
   5  -7   5   38.29    1.47
   2 -13   2  201.50    2.07
   2  -7   4    9.78    0.88
   3 -13   3   89.44    1.76
   5  -6   5   30.57    1.33
   2 -14   1   16.36    0.90
   3 -10   4   46.10    1.45
   4 -11   4  133.79    1.97
   4  -5   5    3.57    0.93
   5 -11   4    0.24    0.81
   4  -3   5   18.13    1.17
   4  -2   5   13.03    1.10
   5  -4   5   76.73    1.66
   2 -10   3    3.10    0.83
   4 -16   1    0.27    0.83
   5  -3   5   45.02    1.40
   3 -14   2   11.59    1.09
   3 -12   3   27.01    1.47
   3  -9   4   12.34    1.16
   4 -13   3   30.56    1.21
   2 -12   2   26.84    1.03
   3 -15   1   22.66    1.01
   4 -10   4   17.48    1.17
   5 -13   3   25.24    1.12
   6 -12   3   36.45    1.12
   3  -8   4    4.96    1.02
   6 -15   1    9.34    0.64
   2  -9   3    5.78    0.90
   6  -8   4    0.12    0.88
   4 -16   0   21.08    1.28
   4  -9   4   12.34    1.28
   5 -14   2  187.00    2.17
   5 -12   3   14.71    1.28
   4 -15   1    1.93    1.03
   6 -13   2    0.43    0.63
   6  -7   4    8.01    0.90
   3 -14   1   12.63    1.12
   6 -15   0    3.37    0.71
   3 -10   3    0.45    1.03
   6 -14   1  138.00    1.95
   2 -12   1   74.99    1.28
   3  -5   4  238.66    2.02
   4 -11   3   12.68    1.12
   5 -11   3   17.04    1.17
   3 -12   2  145.27    1.92
   5 -13   2  306.51    2.77
   5  -7   4   30.71    1.38
   6  -5   4    8.46    1.01
   6 -12   2  104.38    1.71
   3  -4   4  317.01    2.11
   5 -15   0   39.06    1.27
   6  -4   4   49.55    1.36
   3  -9   3    0.06    0.94
   3  -3   4   42.33    1.12
   4  -6   4    0.47    1.06
   5  -6   4    3.37    1.05
   6  -3   4    7.46    1.04
   7 -10   2    3.21    0.70
   2  -6   3  948.94    3.16
   3  -2   4   30.56    0.97
   3  -1   4   82.40    1.19
   5 -10   3    4.67    1.00
   6  -9   3   12.51    0.97
   4 -12   2   10.71    1.26
   4  -5   4   53.05    1.35
   5 -12   2   66.22    1.49
   6 -14   0    1.24    0.85
   2 -11   1  270.70    1.84
   3 -11   2   84.64    1.46
   6 -11   2   18.40    1.04
   7  -5   3    3.83    0.94
   5  -4   4   27.60    1.13
   6  -8   3    6.58    0.86
   7  -9   2    0.29    0.66
   2 -12   0   28.08    0.85
   7  -4   3   22.14    1.14
   4 -14   0   10.63    0.89
   4  -2   4  104.64    1.56
   5  -2   4   73.67    1.46
   6 -14  -1    7.03    0.83
   4   0   4   12.05    1.03
   7  -8   2    4.46    0.78
   7  -3   3   13.71    1.03
   3  -7   3  176.44    1.72
   4 -11   2   70.35    1.60
   7  -2   3   11.73    0.91
   6 -13   0    4.53    0.83
   7 -10   1    5.19    0.68
   2 -10   1  627.88    2.54
   6  -6   3   23.14    1.21
   3  -6   3  264.28    1.92
   5 -14  -1    9.46    0.88
   7 -11   0    1.52    0.62
   5 -10   2   -0.18    0.92
   5  -7   3   16.56    1.33
   2 -11   0   52.29    0.92
   4 -10   2    5.40    1.16
   5 -13   0   13.53    1.28
   6 -11   1   49.44    1.29
   6  -5   3   97.93    1.75
   3 -11   1   15.79    0.97
   3  -9   2   26.75    1.01
   4 -13   0  202.00    2.04
   6 -13  -1    1.68    0.89
   7  -9   1   10.23    0.79
   3 -13  -1   69.65    1.19
   4  -6   3   34.29    1.39
   6  -4   3  259.98    2.43
   3 -12   0   25.89    1.00
   6 -13  -2   10.23    0.84
   5 -11   1   43.05    1.66
   5  -9   2   -0.19    1.05
   6  -3   3   73.13    1.60
   7 -11  -1   19.04    0.82
   7 -10   0    3.51    0.67
   7  -5   2   54.96    1.32
   7  -8   1    3.46    0.70
   3  -8   2   39.24    1.10
   5 -13  -1    5.46    0.86
   6  -2   3    5.08    0.99
   4 -13  -1   -0.13    0.94
   5 -12   0   14.06    1.16
   7  -4   2   21.15    1.16
   3  -3   3  107.67    1.24
   4 -12   0  295.14    2.30
   6 -12  -1    6.43    0.89
   6 -11   0   16.86    1.04
   6  -7   2    7.04    1.00
   5  -4   3  124.29    1.76
   6   0   3   -0.64    1.14
   4  -4   3  252.25    1.97
   5 -13  -2    3.67    1.14
   7  -7   1    0.49    0.68
   7  -3   2   38.14    1.32
   3 -12  -1    0.28    0.91
   5 -10   1   65.17    1.57
   5  -3   3  748.24    3.49
   6  -9   1   46.57    1.38
   3 -11   0  229.93    1.72
   3  -7   2  215.63    1.67
   6  -6   2   29.01    1.26
   7  -2   2    9.38    1.04
   5  -7   2   23.62    1.38
   5  -2   3  322.60    2.29
   7  -6   1    3.64    0.80
   3  -9   1    4.88    0.88
   5 -12  -1   32.57    1.15
   6 -10   0    2.85    0.89
   7 -10  -2    4.91    0.57
   7  -8   0    0.17    0.79
   7   0   2   -0.73    0.88
   4 -12  -1   69.22    1.41
   4 -11   0  601.58    3.09
   4  -7   2    7.11    1.02
   4  -2   3   15.85    0.90
   5  -1   3   23.57    1.15
   6 -11  -1  100.62    1.56
   7   1   2    4.63    1.01
   3  -6   2  193.70    1.53
   5   0   3  206.51    1.82
   7  -5   1   27.62    1.15
   4  -1   3   92.59    1.23
   5  -6   2  200.25    2.09
   4   0   3    0.54    0.79
   5 -12  -2  168.43    1.70
   4  -6   2    3.44    0.91
   6 -11  -2    0.73    0.85
   4   1   3   92.34    1.16
   5 -10   0  710.81    3.46
   6  -9   0    1.30    0.92
   6  -7   1  131.51    1.79
   3  -8   1  122.20    1.32
   3  -5   2   55.59    0.99
   5 -11  -1  214.74    2.00
   6 -11  -3   22.98    0.96
   6  -3   2    5.58    1.11
   7  -9  -2   19.57    0.95
   5  -5   2  118.26    1.65
   7  -8  -1    0.16    0.63
   7  -3   1    5.18    1.10
   4 -11  -1   42.74    1.05
   6  -1   2    4.07    0.98
   3 -11  -2  164.45    1.47
   5  -7   1  262.93    2.19
   7  -7  -1   77.47    1.35
   3  -9   0   38.63    0.88
   3  -7   1   78.37    1.06
   6  -9  -1   12.32    1.04
   7  -5   0   39.10    1.12
   6  -5   1   -0.15    0.96
   7  -1   1    0.72    0.88
   5 -11  -3  272.46    2.06
   6 -10  -3    0.25    0.78
   7  -8  -3   42.07    1.05
   4 -11  -2  158.77    1.52
   4  -7   1   12.93    0.87
   6  -7   0   35.29    1.26
   7  -4   0   34.85    1.14
   4 -10  -1  100.33    1.29
   5  -6   1  761.69    3.19
   7  -6  -1    0.71    0.62
   5  -8   0   79.05    1.44
   7  -7  -2   31.74    0.93
   7   2   1   10.21    0.81
   6  -8  -1   20.18    0.94
   5 -10  -2   80.73    1.25
   5  -1   2    1.16    0.90
   4  -6   1   73.97    1.07
   4  -8   0   26.05    0.94
   5  -5   1  642.26    2.83
   6  -9  -4    9.30    0.72
   6  -9  -3    0.86    0.85
   3 -10  -2   72.24    0.95
   7  -6  -2   15.10    0.87
   5 -10  -3   98.80    1.35
   7  -2   0   36.84    0.98
   3  -9  -1  145.60    1.16
   6  -7  -1    0.57    0.76
   4  -9  -1  306.20    1.80
   4  -1   2   65.90    0.87
   6  -5   0    0.36    0.77
   4  -5   1  451.01    1.99
   5  -9  -2  156.52    1.65
   5  -8  -1  649.31    2.82
   5   3   2   77.52    1.07
   6  -1   1    0.20    1.04
   7  -5  -2    4.17    0.63
   3  -7   0   33.09    0.68
   4 -10  -3  467.72    2.09
   4  -7   0  612.60    2.30
   6  -8  -3    5.89    0.77
   7   0   0    0.30    0.86
   5  -6   0  310.95    1.96
   6  -8  -4   27.57    0.92
   6  -6  -1    7.10    0.77
   6  -4   0   59.60    1.15
   6   0   1    0.36    0.90
   4   1   2   67.77    0.80
   5  -9  -3    4.19    0.69
   7  -5  -3   10.73    0.66
   4  -8  -1  313.93    1.74
   5  -9  -4   20.11    0.89
   6   1   1   -0.36    0.71
   7  -4  -2    5.77    0.59
   3  -8  -1    6.03    0.59
   4   2   2    0.26    0.53
   7  -5  -4   15.81    0.62
   7   3   0    9.68    0.73
   7   4   0   36.17    0.90
   7   5   0   42.65    1.01
   4  -6   0   56.05    0.86
   5  -8  -2  153.88    1.41
   6  -7  -5    7.94    0.58
   6  -5  -1   12.44    0.76
   6   4   1   -0.10    0.71
   7  -4  -3   13.82    0.70
   7  -3  -2   66.06    1.06
   7  -1  -1   31.31    0.83
   6  -7  -4   21.12    0.76
   4  -9  -3   47.49    0.90
   6  -2   0   34.61    1.03
   7   0  -1   16.77    0.65
   6  -4  -1    0.92    0.62
   5  -4   0   20.44    0.83
   7  -2  -2    5.43    0.58
   4  -8  -2 1330.07    2.99
   4  -5   0   21.96    0.66
   4  -2   1  453.64    1.62
   6  -6  -5   12.57    0.61
   7  -3  -4    1.90    0.40
   7  -1  -2   11.37    0.69
   7   2  -1    2.88    0.57
   3  -8  -2   23.87    0.52
   6  -5  -6   -0.07    0.37
   6  -3  -1    1.81    0.66
   5  -3   0   23.14    0.76
   7  -2  -3    5.98    0.48
   7   3  -1    0.02    0.54
   5  -5  -1   77.71    1.02
   7   7  -1   82.49    0.97
   5  -7  -3  363.59    1.78
   5   2   1   50.24    0.81
   6   1   0    0.59    0.63
   7  -2  -4    8.92    0.51
   7   5  -1    0.57    0.56
   7   6  -1    0.63    0.51
   4  -8  -3   54.51    0.74
   4  -6  -1   91.25    0.84
   4  -4   0    7.29    0.47
   5  -7  -5    0.38    0.55
   6  -5  -5    0.27    0.50
   7  -1  -3   11.07    0.51
   4  -7  -2    3.01    0.48
   5  -7  -4   10.61    0.52
   5   3   1    0.98    0.50
   6  -5  -4   20.85    0.73
   6   2   0   34.17    0.78
   7   1  -2   10.91    0.56
   4  -8  -4  114.99    0.95
   6  -4  -6   43.72    0.74
   7  -1  -5    5.12    0.34
   3  -8  -3  121.35    0.83
   5  -4  -1   49.52    0.84
   5   4   1   19.72    0.60
   6   3   0  193.16    1.31
   7  -1  -4    2.42    0.39
   7   2  -2    5.42    0.52
   5   5   1  637.04    1.88
   6  -4  -3    7.14    0.68
   6  -3  -2    6.09    0.55
   6  -1  -1   13.00    0.70
   6   4   0   59.84    0.84
   7   0  -3   -0.16    0.37
   6   5   0    0.01    0.58
   3  -7  -2    3.47    0.41
   4  -3   0    3.09    0.46
   5  -6  -3   23.56    0.67
   6   6   0   15.38    0.63
   7   0  -5    1.79    0.32
   4  -5  -1    0.68    0.41
   5  -5  -2   56.67    0.82
   6  -4  -4   23.86    0.77
   7   0  -4    0.19    0.34
   4  -7  -3   16.41    0.58
   6   0  -1   -0.13    0.64
   7   5  -2    4.16    0.43
   7   7  -2   33.90    0.66
   5  -6  -5    1.51    0.50
   5  -6  -4   18.44    0.57
   6  -3  -6    1.62    0.40
   6  -2  -2    1.37    0.48
   4  -6  -2   27.40    0.53
   6  -3  -3   21.31    0.61
   7   1  -5    5.31    0.38
   7   2  -3    6.49    0.44
   6   1  -1   11.24    0.66
   4  -7  -4  190.38    1.10
   4  -2   0   53.65    0.61
   5  -5  -6   44.59    0.69
   5  -4  -2   32.37    0.71
   6  -3  -5   36.23    0.64
   6  -1  -2    1.18    0.46
   7   2  -5    4.72    0.37
   5   1   0   21.01    0.63
   3  -7  -3  284.50    1.03
   4  -4  -1    2.71    0.40
   4   3   1    0.39    0.30
   5  -2  -1    5.92    0.53
   6  -2  -6    5.87    0.42
   7   3  -4    1.57    0.36
   7   5  -3   10.67    0.43
   7   8  -3   67.49    0.75
   7   6  -3   -0.17    0.39
   7   7  -3    0.00    0.38
   5  -5  -4   84.88    0.85
   6   0  -2  520.68    1.98
   6   3  -1    1.78    0.51
   4  -6  -3  152.19    0.90
   4   4   1   75.45    0.58
   5   2   0    1.97    0.43
   6  -2  -4   98.42    0.97
   4  -1   0   66.63    0.60
   6  -2  -5   12.06    0.48
   6   4  -1    0.76    0.45
   7   5  -4   19.91    0.49
   5  -3  -2    7.22    0.54
   5  -1  -1   30.48    0.60
   6  -1  -3   16.81    0.54
   6   5  -1   13.07    0.54
   7   7  -4    1.76    0.25
   5  -4  -6  119.82    0.93
   5   3   0   23.27    0.50
   6  -1  -6   34.52    0.62
   6   1  -2    1.01    0.47
   6   6  -1    7.32    0.46
   6   8  -1   21.72    0.63
   4  -6  -5  113.46    0.86
   4  -6  -4  896.00    2.04
   4  -3  -1   31.86    0.49
   6   7  -1    0.25    0.42
   6  -1  -4   24.03    0.63
   5  -4  -5   55.73    0.72
   5   4   0   20.69    0.51
   6   2  -2    1.65    0.60
   4   0   0   15.28    0.39
   5   0  -1   20.35    0.54
   5  -2  -2   47.47    0.69
   5   5   0    1.81    0.37
   6   0  -6    0.04    0.28
   3  -6  -3   31.80    0.43
   4  -5  -3    8.68    0.39
   5  -3  -3    3.07    0.48
   5   6   0  306.38    1.25
   6   3  -2    6.42    0.60
   5  -3  -6   45.20    0.65
   5  -2  -7   21.26    0.45
   5   7   0    5.52    0.39
   6   0  -4    6.86    0.46
   6   1  -3   18.50    0.53
   4  -2  -1  109.63    0.69
   5   1  -1   30.67    0.63
  -1  -4  -9   71.58    1.31
  -3   1  -8   12.78    1.06
  -2   3  -7    9.84    1.36
  -1  -5  -9   70.32    1.35
   0  -3  -8   22.41    1.17
  -3  -3  -9    0.19    0.60
  -3   3  -7   -1.01    0.98
   0   0  -7   -0.11    1.21
   1   0  -5    1.03    0.80
  -1  -6  -9   71.79    1.29
  -2  -4  -9   17.32    0.87
  -2   5  -5   53.17    1.00
  -1  -7  -9   65.66    1.33
   1  -6  -7   57.60    1.46
  -3   4  -6    3.83    0.92
  -3  -5  -9    5.47    0.69
  -2  -5  -9    7.97    0.80
   0 -12  -8   30.75    1.06
   1 -10  -7   13.10    1.15
  -2   2  -7    2.87    1.13
  -1   1  -7   16.59    1.34
   1  -1  -5   87.94    1.18
  -3   2  -7    0.89    1.03
  -1  -2  -8    7.29    1.15
   0 -11  -8   86.26    1.44
   0   2  -5    1.99    0.87
   1  -3  -6  101.45    1.39
   0  -7  -8    5.74    1.12
  -3  -1  -8   11.90    1.31
   0  -8  -8   16.79    1.15
   0  -2  -7   91.29    1.68
  -4   1  -7   15.05    1.18
  -2   3  -6  133.11    1.72
   1  -4  -6   23.40    1.04
  -1   0  -7  100.44    1.76
  -3   3  -6    8.11    1.19
  -2  -2  -8   11.96    1.07
  -2   1  -7    8.43    1.28
  -2   4  -5  133.91    1.33
  -1  -4  -8    5.45    1.06
  -4  -3  -8   14.48    0.96
  -3  -2  -8   17.77    1.10
  -3   1  -7   54.97    1.44
   1  -5  -6  106.30    1.40
  -3   4  -5   34.19    1.21
   0   1  -5   65.09    1.12
  -1  -5  -8   10.99    1.09
   1  -6  -6   69.01    1.42
  -4   0  -7   -1.10    0.92
   0  -4  -7   12.62    1.29
   0  -1  -6  130.07    1.52
   1  -3  -5  153.48    1.35
  -4  -4  -8    1.83    0.92
  -1  -6  -8   10.48    1.04
  -2   2  -6  125.57    1.73
  -1 -12  -8   80.28    1.39
  -1   1  -6   12.47    1.02
  -2  -4  -8   23.89    1.22
   1 -10  -6   22.69    1.13
  -3   0  -7    1.77    1.06
  -1 -11  -8   98.97    1.50
  -1 -10  -8  115.72    1.69
  -1  -2  -7   72.86    1.89
  -1   2  -5   68.14    1.23
   0 -13  -7   12.82    1.04
   0  -2  -6   32.54    1.11
   0   0  -5    0.23    0.82
   1  -4  -5  239.38    1.55
  -2  -5  -8    6.03    1.06
  -2   3  -5    1.05    0.80
   0 -12  -7    6.78    1.10
  -3  -5  -8   61.51    1.29
  -2  -6  -8   23.66    1.16
   0 -11  -7    0.48    0.92
  -4   1  -6    7.43    1.15
  -3  -1  -7   50.13    1.37
   0  -9  -7   66.67    1.32
   1  -5  -5   82.49    1.18
  -3  -6  -8   13.78    0.91
  -2 -12  -8    2.62    0.67
   0  -3  -6   40.28    1.12
  -2  -8  -8   39.69    1.13
  -3  -7  -8    0.61    0.68
  -3   1  -6  210.35    1.85
  -2 -10  -8    2.01    0.72
  -2  -9  -8  165.17    1.78
  -2  -2  -7    1.18    1.28
  -3  -8  -8    0.78    0.65
  -3  -9  -8   24.24    0.88
  -3  -2  -7   -0.50    1.11
  -1  -1  -6   10.73    1.02
  -1   1  -5    5.77    0.82
  -5  -5  -7   19.21    0.93
  -2   2  -5   12.16    0.74
  -1 -15  -7    4.05    0.68
  -4   0  -6  174.64    1.80
  -2  -3  -7    8.68    1.21
  -5  -6  -7   15.16    0.80
  -1 -14  -7    3.42    0.77
  -1  -6  -7   20.23    1.20
   0  -2  -5    1.93    0.79
  -3   0  -6   -0.80    1.11
  -5  -7  -7   31.39    0.91
  -1 -13  -7   56.64    1.28
  -1   0  -5   13.27    0.87
  -3  -4  -7    0.11    1.26
  -1 -12  -7    0.16    0.84
  -4  -5  -7    7.12    1.02
  -4  -1  -6    7.69    0.86
  -2  -5  -7    1.27    0.93
  -2  -1  -6   13.79    1.02
  -1 -10  -7   29.28    1.14
  -5  -3  -6   22.49    1.01
  -3  -5  -7   25.55    0.97
  -1  -4  -6    0.84    0.93
  -2 -13  -7    7.75    0.77
  -1  -1  -5    4.32    0.76
  -4  -8  -7   16.66    0.77
  -3 -14  -7    5.15    0.58
  -2  -9  -7    1.25    0.96
  -4 -12  -7    5.08    0.61
  -4 -11  -7    8.76    0.66
  -4  -9  -7    0.82    0.56
  -1  -5  -6   18.65    0.98
  -4   0  -5   -0.02    0.74
  -3 -12  -7    4.42    0.56
  -4  -3  -6    9.30    0.81
  -1  -2  -5   56.65    0.86
  -3   0  -5    0.55    0.72
  -5  -6  -6    8.93    0.80
  -4  -4  -6    9.57    0.83
  -2  -1  -5   10.47    0.63
  -5  -7  -6    2.49    0.67
  -3  -4  -6    3.38    0.87
  -5  -8  -6    0.32    0.68
  -2 -16  -6    4.42    0.64
  -1 -10  -6   71.94    1.09
  -4  -5  -6    2.19    0.79
  -6  -7  -5    0.20    0.48
  -2  -2  -5   12.96    0.61
  -1  -4  -5   23.15    0.69
  -6  -8  -5    1.20    0.50
  -4  -2  -5   13.89    0.80
  -2  -7  -6  184.26    1.47
  -4 -14  -6    3.08    0.49
  -3  -6  -6    5.09    0.76
  -6  -9  -5    0.86    0.38
  -2 -13  -6    9.71    0.74
  -2  -8  -6  134.87    1.32
  -4 -13  -6    0.72    0.41
  -4  -8  -6   84.81    1.04
  -3 -14  -6    1.80    0.54
  -2  -9  -6  120.39    1.23
  -4 -12  -6    0.66    0.45
  -4   0  -4   12.08    0.60
  -2 -11  -6   42.97    0.90
  -2 -10  -6  126.83    1.24
  -1 -16  -5   23.98    0.75
  -4 -11  -6    5.30    0.48
  -4 -10  -6    2.76    0.52
  -3 -13  -6    9.23    0.55
  -3  -8  -6    1.62    0.57
  -2 -18  -5   54.24    0.81
  -2  -3  -5    1.74    0.54
  -5  -5  -5    6.06    0.59
  -3 -12  -6   10.98    0.58
  -3 -11  -6    0.98    0.57
  -3 -10  -6   18.61    0.69
  -1  -6  -5    0.43    0.49
  -3 -18  -5    6.43    0.47
  -2  -4  -5  135.28    0.95
  -5  -6  -5   31.09    0.68
  -1 -14  -5    0.26    0.50
  -1  -7  -5  300.37    1.32
  -4  -4  -5    9.29    0.61
  -1 -13  -5   65.23    0.83
  -1  -8  -5   37.14    0.66
   0  -7  -4  563.67    1.43
  -5 -14  -5    0.14    0.33
  -3  -4  -5   36.17    0.68
  -2  -5  -5   52.48    0.69
  -1 -12  -5  592.15    1.91
  -5  -8  -5    5.33    0.68
  -2 -16  -5   77.86    0.86
   0  -8  -4  332.29    1.15
  -5 -13  -5    1.07    0.33
  -4 -16  -5    9.62    0.40
   0 -13  -4   38.71    0.68
  -5 -12  -5    1.08    0.32
  -5 -11  -5    0.92    0.42
  -5  -9  -5   32.16    0.63
   0 -12  -4  212.46    1.01
   0  -9  -4  236.46    0.98
  -3 -16  -5    2.93    0.38
  -2  -6  -5  234.91    1.16
   0 -11  -4    6.75    0.41
   0 -10  -4   18.54    0.41
  -4 -15  -5    1.33    0.31
  -6  -8  -4    0.13    0.40
  -2 -19  -4    6.94    0.40
  -4 -13  -5    6.79    0.36
  -4   0  -3    0.16    0.38
  -2 -11  -5    0.24    0.49
  -4 -11  -5   42.37    0.64
  -3 -13  -5    0.05    0.37
  -5  -5  -4    0.31    0.38
  -4  -3  -4   11.06    0.44
  -5 -16  -4  149.22    0.93
  -3 -11  -5   61.20    0.67
  -5 -15  -4   38.47    0.52
  -5  -6  -4    3.18    0.35
  -2  -4  -4   10.70    0.34
  -4 -17  -4   38.15    0.51
  -1  -7  -4    0.94    0.27
  -5 -14  -4    4.54    0.27
  -6  -6  -3   23.82    0.48
  -1 -13  -4    1.18    0.32
  -5  -8  -4    3.91    0.37
  -2 -16  -4    6.44    0.34
  -1 -11  -4   18.75    0.40
  -5 -11  -4    0.19    0.23
  -4 -15  -4   65.29    0.61
  -6  -8  -3    7.06    0.32
  -4 -19  -3    3.57    0.20
  -4  -6  -4    0.64    0.33
  -2 -19  -3   35.02    0.44
  -2  -6  -4  224.12    0.78
  -6 -10  -3    2.84    0.30
  -6  -9  -3   16.93    0.39
   0 -12  -3   30.28    0.34
  -5 -17  -3    4.48    0.23
  -4 -14  -4    6.81    0.32
  -3 -15  -4   17.64    0.41
  -1 -17  -3   16.81    0.38
   0 -11  -3   93.39    0.46
  -5  -4  -3  131.47    0.69
  -3  -6  -4   15.60    0.33
  -2  -7  -4   10.14    0.27
  -3 -14  -4   57.03    0.55
  -4 -12  -4   54.98    0.53
  -4 -11  -4  133.84    0.76
  -4  -9  -4   12.00    0.39
  -2  -8  -4   20.75    0.32
  -4 -18  -3   12.73    0.29
  -4 -10  -4   16.11    0.36
  -3 -13  -4    1.05    0.27
  -3  -7  -4    0.40    0.26
  -2 -18  -3    0.97    0.23
  -2 -11  -4   78.87    0.55
  -2 -10  -4   79.70    0.53
  -2  -9  -4   19.62    0.33
  -5  -5  -3    0.52    0.28
  -3  -8  -4    5.10    0.30
  -1 -16  -3  242.98    0.84
  -5 -15  -3    0.23    0.20
  -3 -12  -4    1.91    0.30
  -3 -11  -4   57.29    0.53
  -3  -9  -4   11.98    0.34
  -4  -3  -3   77.82    0.45
  -3 -18  -3   25.78    0.37
  -3 -10  -4   44.97    0.46
  -4 -17  -3    0.85    0.18
  -5 -14  -3    7.33    0.24
  -5  -6  -3   21.52    0.33
  -2 -20  -2   26.05    0.34
  -2 -17  -3   45.40    0.42
  -1 -15  -3  316.09    0.90
  -6  -6  -2   30.51    0.37
  -5 -18  -2    3.19    0.17
  -5 -13  -3   24.91    0.34
  -3 -17  -3    6.18    0.27
  -3  -3  -3  107.09    0.43
  -5 -12  -3   13.94    0.31
  -5  -8  -3    0.10    0.26
  -4  -4  -3  249.12    0.72
  -3 -20  -2    1.95    0.19
  -1 -14  -3 1108.45    1.59
  -6 -13  -2    0.78    0.17
  -6  -7  -2    8.32    0.30
  -5 -11  -3   18.27    0.34
  -5  -9  -3    2.08    0.29
  -2 -16  -3    1.23    0.22
  -6 -12  -2   95.11    0.57
  -6  -8  -2   82.61    0.51
  -5 -17  -2   16.69    0.27
  -4 -15  -3    7.70    0.25
  -6 -11  -2   18.28    0.29
  -6 -10  -2   -0.01    0.21
  -6  -9  -2   27.76    0.33
  -2 -19  -2    4.63    0.21
  -1 -12  -3    0.83    0.19
  -4 -14  -3    4.33    0.26
  -2 -15  -3  227.55    0.77
  -3 -19  -2   -0.04    0.18
  -1  -9  -3    6.31    0.16
  -5 -16  -2    1.01    0.13
  -4 -18  -2   11.42    0.23
  -3 -21  -1    6.96    0.20
  -3  -5  -3    0.81    0.15
  -2 -14  -3   52.73    0.39
  -4 -12  -3   23.60    0.30
  -6 -15  -1    8.92    0.19
  -5 -15  -2   41.18    0.38
  -4  -8  -3   13.86    0.26
  -2 -18  -2   18.18    0.26
  -4 -10  -3    1.18    0.22
  -4  -9  -3    1.76    0.21
  -4  -2  -2    0.12    0.11
  -3 -18  -2   10.06    0.23
  -2  -7  -3    0.69    0.14
  -5 -18  -1    3.32    0.15
  -1 -16  -2    2.82    0.18
  -2 -11  -3    5.79    0.19
  -2 -10  -3    3.29    0.16
  -2  -8  -3    2.88    0.15
  -3 -20  -1    5.56    0.18
  -3  -9  -3   -0.03    0.16
  -6  -6  -1   29.00    0.29
  -4 -16  -2  162.14    0.65
  -2 -17  -2    2.33    0.15
  -6 -12  -1   12.42    0.21
  -6  -7  -1  127.26    0.54
  -5 -17  -1    0.58    0.11
  -6 -11  -1   48.61    0.37
  -6 -10  -1    1.40    0.15
  -6  -9  -1   43.98    0.35
  -6  -8  -1   32.54    0.28
  -5  -9  -2    0.09    0.17
  -4 -15  -2    3.40    0.17
  -2 -16  -2   15.38    0.25
  -2 -19  -1   15.16    0.23
  -5 -16  -1    0.02    0.10
  -4 -20   0   17.14    0.22
  -5 -18   0    0.04    0.10
  -5 -15  -1    1.41    0.15
  -3 -15  -2   34.13    0.31
  -2 -15  -2    0.61    0.15
  -5  -3  -1    1.04    0.16
  -4  -5  -2    0.04    0.10
  -4 -17  -1    0.24    0.12
  -2 -18  -1   17.89    0.21
  -5 -14  -1   29.92    0.29
  -4 -10  -2    4.89    0.19
  -2 -20   0   37.97    0.30
  -5 -17   0   -0.23    0.09
  -5 -13  -1  131.78    0.57
  -4  -9  -2    4.13    0.17
  -6 -12   0    9.51    0.19
  -4 -16  -1    0.09    0.14
  -6 -11   0   17.77    0.26
  -6  -6   0   14.46    0.23
  -3 -17  -1    7.11    0.20
  -3 -12  -2  131.22    0.50
  -5 -12  -1    4.23    0.18
  -3 -21   1   10.40    0.18
  -2 -17  -1   37.91    0.29
  -6 -10   0    2.55    0.15
  -6  -9   0    0.96    0.15
  -6  -8   0   78.55    0.41
  -6  -7   0   33.91    0.29
  -5 -16   0    1.72    0.12
  -5 -11  -1   43.26    0.37
  -4 -20   1    0.25    0.10
  -3 -11  -2   78.71    0.39
  -5 -18   1    3.17    0.13
  -4 -18   0   10.73    0.20
  -4 -15  -1    1.79    0.15
  -3 -19   0   62.09    0.40
  -2 -11  -2   28.25    0.22
  -5  -9  -1   10.88    0.24
  -3 -10  -2    1.44    0.14
  -2 -19   0   44.94    0.33
  -5  -8  -1    2.37    0.17
  -5 -15   0   37.11    0.33
  -2 -16  -1    8.00    0.21
  -2  -8  -2   24.89    0.19
  -4 -14  -1   13.97    0.22
  -1 -15  -1   38.75    0.27
  -6 -13   1    2.18    0.16
  -5 -17   1    7.68    0.17
  -4 -17   0   42.02    0.35
  -5 -14   0    7.54    0.20
  -4 -13  -1    0.40    0.17
  -4  -3  -1    0.54    0.10
  -4 -20   2    0.97    0.10
  -3 -21   2    0.45    0.11
  -2 -15  -1    0.10    0.16
  -6 -14   2    7.05    0.19
  -5 -16   1    8.45    0.19
  -6 -10   1    2.91    0.18
  -6  -7   1    0.34    0.20
  -5 -17   2    0.31    0.15
   3  11  -5   10.26    0.22
   4   7  -4  198.31    0.66
   5  -2  -6    3.32    0.17
   5   1  -6   22.12    0.28
   3   6  -2   47.33    0.27
   3  10  -4   58.40    0.37
   4  -5  -3    8.91    0.17
   5  -1  -6   27.40    0.30
   3  11  -6    2.84    0.17
   3  10  -8    0.03    0.13
   3   8  -3  115.03    0.44
   4   3  -3    5.89    0.17
   3   5  -2    7.95    0.15
   4  -4  -3    1.30    0.12
   4   6  -8   15.17    0.25
   4   7  -5    4.19    0.22
   4   2  -3    4.53    0.17
   4   7  -7   53.16    0.43
   3  10  -5   30.64    0.32
   4  -3  -3    6.00    0.15
   4   7  -6   56.38    0.42
   3   9  -4   36.44    0.30
   3  10  -7    5.66    0.19
   4  -2  -3    4.55    0.15
   4   1  -3    7.52    0.17
   4   5  -4  675.82    1.16
   2  11  -4  117.08    0.44
   3   9  -8    0.08    0.15
   3  10  -6    3.34    0.19
   4  -1  -3    7.44    0.16
   4   5  -8    2.84    0.14
   4   6  -5  122.91    0.56
   4   6  -7   11.60    0.22
   4   4  -4  143.48    0.55
   4   4  -8   58.23    0.41
   4  -5  -4  654.14    1.01
   3   9  -5  140.22    0.56
   4   3  -4    4.59    0.20
   4   5  -7   17.94    0.26
   3   8  -4  101.12    0.44
   3   9  -7   42.32    0.36
   4  -5  -8    3.57    0.15
   4   3  -8    7.52    0.18
   4   5  -6    0.25    0.15
   2   9  -3   26.36    0.20
   2  11  -5    1.63    0.16
   3   6  -3   30.65    0.24
   4  -4  -4  142.70    0.49
   4   2  -4    0.52    0.17
   4   4  -5   19.89    0.29
   2  11  -7    4.14    0.21
   4  -6  -7   12.48    0.22
   4  -6  -5  118.43    0.47
   4  -4  -8   64.59    0.42
   4   1  -4    8.88    0.23
   4   2  -8  126.81    0.60
   4   4  -7   13.39    0.25
   4  -3  -4    4.48    0.17
   4   1  -8    1.82    0.16
   4   4  -6   31.56    0.31
   2  10  -8    1.93    0.14
   2  10  -4   -0.07    0.14
   2  11  -6  118.70    0.52
   4  -6  -6   13.88    0.23
   4  -2  -4    0.75    0.14
   4  -1  -4    8.57    0.19
   4   0  -8  315.08    0.93
   4   3  -7   10.20    0.25
   4   3  -5   15.21    0.26
   4  -5  -7   20.38    0.25
   4  -5  -5  154.76    0.54
   4  -2  -8  144.11    0.62
   3   5  -9    6.11    0.17
   3   7  -8    1.21    0.12
   4   2  -5    9.63    0.24
   3   8  -6    0.47    0.17
   4  -5  -6    0.29    0.18
   4  -4  -5   19.10    0.26
   4   2  -7   33.18    0.34
   4  -4  -7   15.50    0.22
   4   1  -7    1.21    0.16
   4   1  -5    7.58    0.22
   2   8  -9    1.47    0.12
   2   8  -3    0.20    0.13
   4  -4  -6   33.48    0.30
   4  -3  -7   10.83    0.22
   4  -3  -5   14.75    0.22
   4   0  -7    0.00    0.14
   4   0  -5    0.32    0.17
   2  10  -5    1.71    0.17
   3   4  -3  278.34    0.60
   4  -2  -7   38.66    0.34
   4  -2  -5    9.58    0.21
   4   1  -6   80.14    0.46
   3   6  -8   11.12    0.21
   3   6  -4  139.58    0.49
   4  -3  -6  463.41    0.98
   4  -2  -6  321.26    0.85
   4   0  -6  164.57    0.63
   2   9  -8   21.61    0.28
   2   9  -4  105.66    0.40
   2  10  -6   12.17    0.25
   3   3  -9    8.65    0.18
   2   7  -9    0.14    0.14
   3   2  -9   12.00    0.22
   3   5  -8    0.80    0.14
   3  -5  -9    6.83    0.16
   3   5  -4   18.12    0.22
   3   6  -7   27.58    0.31
   3   6  -5  126.76    0.51
   3   1  -9   53.30    0.39
   3   2  -3  287.37    0.59
   2   8  -8   39.36    0.36
   2   9  -7   55.39    0.38
   2   9  -5    0.75    0.18
   3   4  -8   21.95    0.28
   3   6  -6    5.92    0.23
   3  -3  -9    8.47    0.18
   3  -1  -9   51.59    0.40
   3   0  -9   13.74    0.23
   3   1  -3    0.39    0.12
   2   6  -9    5.03    0.16
   2   8  -4    9.34    0.18
   2   9  -6   74.41    0.42
   3  -7  -8    1.40    0.15
   3   4  -4    0.35    0.13
   3   0  -3  129.59    0.39
   3   3  -8    2.49    0.16
   3   5  -5  388.79    0.85
   3   5  -6  193.25    0.67
   3   3  -4   -0.09    0.16
   3   4  -7   90.68    0.51
   1   8  -9   20.27    0.27
   2   8  -7   61.61    0.43
   3  -6  -8   12.07    0.21
   3   2  -8   71.18    0.46
   3   4  -5  160.59    0.56
   1  10  -7   14.22    0.27
   2   8  -5   28.48    0.27
   3  -5  -8    0.57    0.17
   3   1  -8  333.08    0.99
   3   4  -6  543.11    1.08
   1   9  -8    0.24    0.14
   2   8  -6    1.50    0.18
   3  -7  -7   22.40    0.28
   3  -6  -4  129.13    0.42
   3   2  -4   29.47    0.25
   3   3  -7   18.10    0.26
   2   7  -4    4.91    0.14
   3  -4  -8   25.37    0.28
   3  -3  -8    2.65    0.19
   3  -1  -8  331.35    0.94
   3   3  -5    0.67    0.17
   2   4  -9   19.03    0.26
   3  -7  -5    5.72    0.21
   3   2  -7   81.44    0.48
   3   3  -6  138.55    0.57
   1   7  -9   22.66    0.33
   2   7  -7   32.62    0.33
   3  -7  -6   51.07    0.36
   3  -6  -7   28.68    0.28
   3  -5  -4   17.06    0.20
   3   0  -4   -0.07    0.13
   3   2  -5   35.22    0.30
   2   3  -9   45.20    0.37
   3  -5  -7    2.87    0.18
   3  -4  -4    0.39    0.12
   3   2  -6    0.17    0.20
   1   9  -4   26.74    0.21
   2   7  -6   65.20    0.41
   2   7  -5   17.64    0.23
   3  -6  -5  121.33    0.46
   3  -3  -4    0.24    0.13
   3  -2  -4   29.48    0.23
   3   0  -7   28.77    0.32
   1   8  -8   15.92    0.28
   1   9  -7   14.82    0.34
   2   5  -8   56.01    0.42
   3  -6  -6    5.76    0.19
   3  -4  -7  100.61    0.50
   3  -1  -7  114.65    0.55
   3   1  -6    0.48    0.21
   3   1  -5    1.49    0.18
   2   2  -9    6.16    0.18
   3  -5  -5  378.67    0.80
   3  -3  -7   19.62    0.28
   0   8  -9    0.60    0.12
   3  -5  -6  186.53    0.62
   3   0  -6    0.29    0.20
   3   0  -5   12.08    0.22
   2  -6  -9    5.30    0.20
   2   1  -9   22.38    0.27
   3  -4  -6  527.90    1.05
   3  -4  -5  158.89    0.53
   3  -1  -6    0.90    0.19
   3  -1  -5    1.56    0.18
   1   2 -10   15.40    0.24
   1   9  -6  142.97    0.65
   2   4  -8   21.02    0.29
   3  -3  -6  141.19    0.57
   3  -3  -5    0.70    0.15
   3  -2  -5   35.43    0.30
   2  -5  -9    0.11    0.16
   2  -4  -9   20.85    0.29
   2  -1  -9   22.67    0.29
   2   5  -7    0.61    0.27
   1   1 -10    0.87    0.13
   1   5  -9   14.16    0.28
   1   7  -8   16.49    0.28
   2  -2  -9    6.64    0.20
   2   3  -8   57.04    0.48
   2   5  -4  221.33    0.57
   1   8  -7   47.05    0.46
   0   7  -9    6.31    0.21
   1   0 -10    0.01    0.12
   1  -1 -10    0.75    0.13
   2   2  -8   86.41    0.57
   2   5  -6   66.14    0.43
   2   5  -5  232.68    0.66
   2   4  -7    1.59    0.23
   2  -7  -8   22.40    0.36
   2   4  -4  129.05    0.45
   1   6  -8    0.71    0.22
   1   8  -5   23.56    0.26
   2  -6  -8   27.22    0.34
   2   3  -7   17.71    0.32
   0   8  -8   16.47    0.28
   1   3  -9   12.08    0.27
   2   0  -8  278.70    0.97
   2   4  -6   26.08    0.33
   2   4  -5   84.00    0.43
   0   9  -7   79.92    0.49
   2  -1  -8    2.09    0.21
   2  -8  -7   65.08    0.46
   2  -2  -8   85.21    0.55
   2   2  -7   39.94    0.44
   0   2 -10    0.02    0.12
   1   2  -9   55.71    0.48
  -1   7  -9   54.37    0.46
   1   7  -6   17.83    0.42
   2   3  -6  165.32    0.67
   2   1  -7  118.44    0.63
   2   3  -5  221.94    0.68
   0   1 -10    5.67    0.21
   0   5  -9   32.66    0.39
   1   1  -9   94.97    0.62
   1   6  -7   55.78    0.46
   1   7  -5   89.94    0.52
   2  -7  -7   33.46    0.35
   0   7  -8    6.06    0.24
   0   9  -6  281.88    0.84
   2   0  -7   -0.05    0.29
   2   2  -6   10.72    0.30
   1   0  -9   15.81    0.32
   2  -8  -6    2.02    0.25
   0   8  -7    2.81    0.28
   1  -6  -9    6.19    0.26
   1  -1  -9   87.84    0.66
   2  -5  -7    0.87    0.28
   2  -1  -7  122.97    0.67
   2   2  -5  154.14    0.59
   1  -2  -9   56.46    0.53
   2  -8  -5   32.61    0.34
   2  -4  -7    1.69    0.26
   2  -2  -7   41.99    0.45
   2   1  -6   33.02    0.39
   2   1  -4   25.13    0.26
  -1   6  -9   71.91    0.59
   0  -3 -10    0.32    0.16
   0  -2 -10    0.16    0.16
   0   4  -9   24.54    0.37
   1  -3  -9   14.49    0.30
   1   3  -8    1.23    0.23
   1   6  -6   80.31    0.51
   2  -7  -6   70.28    0.48
   2   1  -5   19.77    0.29
   0   6  -8   -0.16    0.27
   1   6  -5   30.87    0.34
   2   0  -4  140.70    0.51
   1  -9  -8    0.17    0.22
   2  -7  -5   20.15    0.30
   2  -6  -6    5.98    0.27
   2  -1  -6   33.87    0.40
   2  -5  -6   68.02    0.49
   2  -2  -6   10.91    0.32
   2   0  -5    0.18    0.21
   1   4  -7    1.29    0.31
   2  -6  -5   61.23    0.43
   2  -4  -6   26.94    0.38
  -1   5  -9   81.52    0.67
   0   7  -7  124.28    0.69
   2  -1  -5   20.15    0.30
   0  -9  -9    5.24    0.27
   0   2  -9   54.60    0.58
   2  -5  -5  251.25    0.77
   2  -2  -5  156.90    0.63
  -1   7  -8    1.75    0.32
   0   5  -8   20.32    0.42
   0   8  -5   38.86    0.38
   1   0  -8    0.39    0.27
   1   5  -5  122.04    0.63
   0   1  -9   17.48    0.42
   1  -1  -8   15.05    0.39
   0  -8  -9    1.24    0.23
   1  -6  -8    0.78    0.31
   1   4  -6   25.48    0.42
  -1   4  -9   74.17    0.66
  -1   8  -7  450.21    1.36
   0   6  -7    8.42    0.42
   0  -7  -9    6.49    0.34
   0   0  -9    0.15    0.25
   0   4  -8   23.58    0.49
   0   7  -6  590.35    1.38
  -2   5  -9    8.65    0.35
   0  -1  -9   14.85    0.41
  -1   6  -8   12.00    0.39
   1   4  -5  276.56    0.89
  -1   3  -9   28.47    0.48
   0  -2  -9   51.56    0.61
   1   1  -7   15.95    0.48
   1   3  -6  110.17    0.69
   0  -4  -9   19.85    0.43
   0   3  -8   19.99    0.49
   0   5  -7    4.98    0.47
   0   7  -5   68.07    0.48
   1   0  -7  378.99    1.36
   0 -10  -8   66.59    0.68
  -2   4  -9   17.64    0.46
  -1   7  -7   93.72    0.78
   0   6  -6   19.17    0.44
   1  -7  -7   38.85    0.54
   1  -1  -7   16.54    0.53
   1   2  -6  102.68    0.70
   1   3  -5  180.51    0.81
  -1   5  -8   10.50    0.47
   0   2  -8   17.53    0.52
   1  -6  -7   57.44    0.71
  -1  -9  -9    0.51    0.28
  -1   8  -6  439.22    1.33
   0  -9  -8  141.63    1.04
   1  -9  -6  156.09    0.93
   1   1  -6    4.31    0.49
   0   1  -8   60.47    0.72
  -2   3  -9    3.46    0.39
  -1  -8  -9    6.84    0.43
   1   2  -5  327.65    1.08
  -1   4  -8    7.06    0.59
   0  -8  -8   16.02    0.57
   0   6  -5   31.50    0.47
   1   0  -6   -0.06    0.40
   0   5  -6   22.67    0.50
  -1  -7  -9   55.40    0.72
   0  -7  -8    6.47    0.57
   0   3  -7   11.09    0.55
  -3   3  -9   -0.03    0.28
  -2   2  -9    2.60    0.42
   1   1  -5   86.79    0.66
  -1  -4  -9   68.00    0.85
   0  -2  -8   16.81    0.56
   1  -2  -6   91.50    0.79
  -2   5  -8    4.84    0.51
  -1   3  -8    5.78    0.58
  -1   7  -6  391.05    1.45
   0  -4  -8   18.59    0.61
   1  -6  -6   72.83    0.72
   1  -3  -6   99.63    0.84
   0   2  -7   84.25    0.91
   1  -5  -6  113.50    0.87
   0 -10  -7   18.47    0.66
   0   4  -6  109.74    0.87
   1  -8  -5   21.68    0.52
   1   0  -5    1.29    0.42
  -3   2  -9    6.60    0.44
  -1   5  -7  112.52    0.99
   0   5  -5   13.44    0.44
  -2   0  -9   -0.01    0.37
  -1   2  -8    8.88    0.67
   1  -1  -5   82.57    0.72
  -2  -8  -9   17.83    0.58
   0   1  -7  175.23    1.26
   1  -7  -5   96.60    0.82
  -3   5  -8   71.62    0.92
  -2  -1  -9    3.97    0.48
  -2   4  -8   23.67    0.66
   0  -9  -7   63.87    0.84
   1  -2  -5  281.79    1.18
  -3   1  -9    0.00    0.37
  -1   1  -8   12.17    0.77
   0   0  -7   -0.02    0.81
   0   3  -6   48.59    0.74
  -2  -2  -9    2.59    0.41
  -1   6  -6   18.46    0.62
   1  -5  -5   93.54    0.78
   1  -3  -5  149.70    0.97
  -2  -6  -9   59.64    0.85
  -2  -5  -9    7.79    0.53
  -2  -3  -9    2.71    0.42
  -2   6  -7   13.40    0.65
  -1  -9  -8    0.44    0.62
  -1   4  -7    3.95    0.64
   0  -8  -7    2.44    0.53
  -3   0  -9    0.51    0.40
  -2  -4  -9   14.52    0.56
  -1   0  -8    0.59    0.55
   0  -1  -7  163.91    1.31
   0   4  -5  325.60    1.29
  -2   3  -8   15.61    0.73
   0  -2  -7   79.40    1.20
  -3  -1  -9    0.12    0.40
  -3   4  -8   16.02    0.71
  -1  -8  -8   40.01    0.88
   0   2  -6   33.92    0.75
   0  -3  -7   11.12    0.81
  -3  -2  -9    4.89    0.51
  -2   7  -6  178.30    1.29
  -1  -7  -8    0.95    0.69
  -1   3  -7   14.48    0.81
  -3  -3  -9   -0.16    0.48
  -2   2  -8   12.26    0.84
  -1   5  -6   20.00    0.67
  -3  -5  -9    6.58    0.51
  -3  -4  -9    0.74    0.44
  -2   5  -7    1.01    0.59
  -1  -4  -8    5.09    0.70
  -3   3  -8   64.30    1.08
  -2 -10  -8    1.34    0.71
  -1 -11  -7    5.58    0.79
  -1   2  -7   71.66    1.16
  -1   6  -5    1.10    0.53
   0   0  -6   13.64    0.74
  -2   0  -8    6.88    0.91
  -1   4  -6    1.49    0.70
   0  -1  -6  129.52    1.23
   0   2  -5    1.60    0.61
  -3   2  -8   16.32    0.83
  -2  -9  -8  176.70    1.56
  -1   1  -7   14.71    1.02
   0  -8  -6  127.69    1.26
  -2   6  -6  268.34    1.65
   0  -2  -6   33.63    0.92
  -4   2  -8   11.65    0.87
  -2  -8  -8   40.28    1.02
  -2  -1  -8    1.66    0.78
  -1  -9  -7  304.99    2.04
   0  -6  -6   17.38    0.90
   0  -4  -6  111.88    1.41
   0  -3  -6   42.52    0.97
  -3 -10  -8   47.62    1.03
  -3   1  -8   12.67    0.87
  -1   5  -5  360.21    1.63
   0   1  -5   66.20    0.94
  -2  -6  -8   25.19    0.93
  -2  -5  -8    4.81    1.06
  -2  -4  -8   25.39    1.21
  -2  -3  -8   15.86    1.01
  -2   3  -7    8.16    0.96
  -1   3  -6    4.85    0.86
   0 -10  -5   78.70    1.11
  -2 -12  -7   31.41    0.97
  -1  -8  -7  411.37    2.37
  -1  -7  -7   97.44    1.63
  -1  -2  -7   75.94    1.50
  -3  -9  -8   27.07    0.91
  -3   4  -7   -0.39    0.78
  -4   0  -8   50.90    1.18
  -3  -1  -8   14.17    0.87
  -2   2  -7    2.69    1.07
  -1  -5  -7  127.41    1.69
   0  -9  -5  148.64    1.31
  -3 -13  -7   20.89    0.82
  -1   2  -6    7.07    0.99
  -3  -2  -8   16.56    0.95
  -3   6  -6    4.67    0.99
  -2 -11  -7  126.75    1.53
  -1 -11  -6   59.00    1.31
  -1   4  -5   29.53    0.98
   0  -1  -5   67.90    1.06
  -3  -3  -8   62.48    1.32
   0  -8  -5   39.18    0.91
  -3  -6  -8   15.14    0.93
  -3  -5  -8   72.85    1.29
  -3   3  -7   -0.33    1.16
  -2   1  -7    8.65    1.24
   0  -2  -5    2.20    0.84
   0  -7  -5   70.93    1.09
  -4  -7  -8   38.71    1.04
  -4  -3  -8   14.74    0.84
  -1 -10  -6   90.54    1.53
   0  -3  -5  166.23    1.42
  -4  -6  -8   14.58    0.87
  -4  -4  -8    1.16    0.72
  -3 -12  -7    4.64    0.86
  -2   0  -7    1.76    1.33
   0  -5  -5   13.63    0.86
   0  -4  -5  404.09    2.01
  -1   1  -8   13.26    0.94
   3  -4  -4    0.45    0.50
  -2  -2  -9    2.48    0.60
   1  -6  -9    5.41    0.73
   2  -6  -8   27.90    0.98
   0  -3  -9    6.63    0.67
   2  -1  -6   30.30    0.94
   3  -7  -6   50.44    1.04
   1  -2  -8   -0.61    0.79
   2  -3  -7   17.12    1.24
   1   0  -7  358.10    2.06
   2 -12  -8    0.12    0.58
   0  -4  -9   21.17    1.01
   1   2  -5  292.34    1.51
   2  -8  -8   38.32    0.98
   3  -5  -4   17.10    0.83
  -1  -3  -9   29.55    1.11
   1  -9  -9   11.40    0.67
   2 -10  -8    2.13    0.78
   3  -6  -5  123.15    1.33
  -1   0  -8   -0.07    0.88
   2  -2  -6   10.23    1.00
   2  -1  -5   18.60    0.79
   0  -5  -9   34.07    0.96
  -2  -4  -9   14.63    1.00
   0  -6  -9   17.03    1.00
  -2  -1  -8    1.21    0.94
  -1  -1  -8   12.94    1.20
   0  -2  -8   19.62    1.15
   1   0  -6    0.09    0.99
   1   1  -5   83.24    1.13
  -1   1  -7   15.21    1.14
   0  -7  -9    5.76    0.77
   1  -5  -8    0.15    1.01
   2  -6  -7    4.37    1.15
   0   0  -7   -0.53    1.21
   1  -2  -7  137.22    1.87
  -1   3  -5  192.46    1.47
   0  -9  -9    4.78    0.89
   2  -7  -7   31.82    1.32
  -2  -6  -9   80.98    1.46
   0 -10  -9   12.03    0.88
   0  -3  -8   17.58    1.14
   2  -4  -6   26.28    1.29
  -2   2  -6  126.73    1.52
  -1  -2  -8    8.32    1.56
  -2  -2  -8   11.71    1.23
  -1  -7  -9   46.02    1.30
   0   1  -6  145.62    1.58
   0   2  -5    2.84    0.84
   1  -7  -8   14.37    1.15
   2 -13  -7   13.70    1.01
   2  -9  -7   53.14    1.46
  -2  -7  -9   49.88    1.16
   2 -10  -7   12.27    1.30
  -1  -8  -9    6.83    0.96
  -1   0  -7   99.19    1.67
   0  -4  -8   19.02    1.25
   0  -1  -7  195.31    2.05
   1  -8  -8   15.56    1.03
   2  -5  -6   64.65    1.68
   2  -3  -5  213.52    1.55
  -2  -8  -9   19.24    0.97
  -2   0  -7   -0.31    1.42
   1 -13  -8    2.55    0.98
   1 -11  -8   35.46    1.40
  -2  -3  -8   16.60    1.35
  -3  -4  -8   19.89    1.37
  -1   1  -6   11.96    1.16
   0  -2  -7   84.10    2.04
   0   0  -6   14.25    1.21
   1  -2  -6   92.47    1.53
   2  -4  -5   82.97    1.19
  -2   1  -6   13.65    1.31
  -1  -1  -7   15.12    1.42
  -1   2  -5   73.48    1.21
   0  -6  -8   -0.65    1.21
   0   1  -5   65.16    1.14
   2  -7  -6   69.94    1.47
  -2  -4  -8   25.62    1.54
   1  -1  -5   83.65    1.29
  -3  -5  -8   70.15    1.36
  -2  -1  -7    7.80    1.27
  -2   2  -5   12.93    1.14
   0  -7  -8    4.99    1.23
   1  -6  -7   51.13    1.73
   1  -3  -6   97.20    1.58
   2  -5  -5  218.79    1.62
  -3  -2  -7    1.27    1.29
  -1  -5  -8    9.44    1.28
   2  -9  -6   69.42    1.48
   0  -8  -8   13.53    1.27
   0  -1  -6  126.79    1.55
   2 -13  -6    0.74    1.21
  -3  -6  -8   14.76    1.08
  -2  -5  -8    6.46    1.24
   0  -9  -8  151.20    1.95
   1  -7  -7   33.70    1.63
   2 -12  -6   35.45    1.43
   2 -11  -6  108.02    1.58
  -1  -6  -8   11.12    1.16
  -1   0  -6   -0.32    1.02
   0 -13  -8   39.20    1.17
   0 -10  -8   65.84    1.53
   2  -6  -5   60.14    1.10
   0 -12  -8   29.05    1.08
   0 -11  -8   77.87    1.42
   0  -4  -7   13.21    1.58
   1  -8  -7   47.87    1.70
   1  -4  -6   23.36    1.32
   1  -2  -5  291.83    1.78
  -3  -7  -8    0.28    1.05
  -2  -6  -8   24.52    1.40
  -2   0  -6  231.91    1.93
  -1  -7  -8    1.58    1.15
  -1   1  -5    5.37    0.91
  -3  -3  -7   -0.59    1.31
   1 -10  -7   14.12    1.41
   2  -7  -5   15.94    1.07
   2  -5  -4  213.48    1.39
  -3  -8  -8   -0.27    1.04
  -2  -7  -8  242.72    2.22
  -1  -8  -8   38.47    1.25
   0  -2  -6   33.10    1.22
   1  -5  -6  102.41    1.57
  -2  -3  -7    7.27    1.19
  -2   1  -5   11.99    0.92
  -1 -14  -8   20.99    0.87
  -1  -1  -6   11.01    1.09
   2  -8  -5   27.57    1.09
  -3 -10  -8   36.57    1.23
  -1 -13  -8    5.65    0.87
  -1 -10  -8   95.24    1.44
   1  -3  -5  151.04    1.40
  -1 -12  -8   77.75    1.27
   0  -6  -7    7.39    1.21
   2  -6  -4    1.39    0.89
  -3  -4  -7    1.89    1.06
   1  -6  -6   70.56    1.42
  -2 -13  -8    6.14    0.77
  -2  -1  -6   14.49    1.02
   2 -10  -5    1.75    1.00
  -2  -4  -7    9.89    1.35
  -1   0  -5   14.16    0.73
   0 -16  -7   13.49    0.97
   1  -7  -6   25.08    1.26
  -1  -5  -7  110.37    1.70
  -3  -5  -7   27.96    0.97
   1 -16  -6   35.61    0.98
  -3  -2  -6   21.30    1.17
   0 -15  -7   13.17    0.91
   0  -9  -7   67.86    1.29
  -2  -5  -7    0.44    1.04
   1 -15  -6   42.34    1.10
   2  -8  -4    9.22    0.77
  -4  -8  -7   19.49    0.91
  -2   0  -5    0.39    0.68
   0 -10  -7   16.26    0.98
   0  -2  -5    1.88    0.81
   1  -9  -6  145.30    1.55
  -3  -6  -7    2.31    0.93
   0 -12  -7    7.13    0.87
   1 -10  -6   22.72    1.27
   1  -5  -5   87.53    1.07
  -4  -9  -7    1.33    0.66
   1 -13  -6   28.89    1.00
   1 -12  -6   32.22    1.17
   1 -11  -6    0.79    0.95
   2  -9  -4  100.46    1.02
  -2  -6  -7   15.63    1.09
  -1  -1  -5    4.89    0.65
  -3  -7  -7   21.92    0.92
  -3  -3  -6    9.63    0.93
  -1 -16  -7   11.42    0.68
   2 -11  -4  113.96    1.12
  -3  -8  -7   55.50    1.20
  -1 -15  -7    4.53    0.58
   0 -18  -6    0.08    0.66
  -1 -14  -7    2.60    0.74
  -1 -10  -7   29.71    0.95
  -1  -4  -6    1.50    0.83
  -2 -16  -7    3.31    0.54
  -2  -8  -7   20.57    1.03
  -2  -1  -5    9.76    0.67
  -1 -13  -7   66.94    1.03
  -1 -12  -7    0.38    0.87
  -1 -11  -7    5.38    0.80
  -3  -9  -7  118.51    1.30
   0 -17  -6   10.75    0.74
  -3 -14  -7    4.34    0.52
  -3 -10  -7  116.30    1.24
  -3  -4  -6    4.26    0.86
  -2  -9  -7    1.51    0.75
  -3 -11  -7   26.17    0.76
  -2 -14  -7    6.86    0.61
  -2 -10  -7  395.84    2.01
  -2  -4  -6  150.48    1.31
   1  -8  -5   23.51    0.86
  -2 -13  -7    7.43    0.54
  -2 -12  -7   32.23    0.86
  -2 -11  -7  123.83    1.19
  -1  -5  -6   20.61    0.84
   0 -16  -6   25.17    0.75
   0  -8  -6  126.46    1.25
   0  -4  -5  336.43    1.36
   1 -16  -5   16.34    0.82
   0 -15  -6    5.50    0.71
   0  -9  -6  271.41    1.57
   1  -9  -5    1.50    0.62
   0 -10  -6   63.92    1.14
  -3  -5  -6    2.87    0.66
  -2  -5  -6    9.52    0.84
  -1 -18  -6    0.25    0.42
  -1  -6  -6   21.39    0.79
   0 -11  -6  215.85    1.49
   1 -14  -5   73.84    0.87
   1 -10  -5   18.61    0.68
  -4  -7  -6    2.26    0.73
  -2  -2  -5   14.14    0.52
   0 -12  -6   23.43    0.82
   1 -13  -5   28.54    0.65
   1 -12  -5   27.32    0.70
   1 -11  -5    5.04    0.62
  -1  -3  -5  190.43    0.98
   0 -19  -5    7.53    0.52
   0  -5  -5   13.61    0.55
   1  -6  -4   17.97    0.44
  -3  -6  -6    5.18    0.56
  -1 -16  -6   31.74    0.59
  -1  -8  -6  443.58    1.65
   0  -6  -5   31.56    0.55
   0 -18  -5    0.00    0.45
   1  -7  -4    3.29    0.32
  -4 -10  -6    3.31    0.48
  -3  -3  -5    0.85    0.43
  -2 -17  -6    4.46    0.39
  -2  -3  -5    1.34    0.38
  -1  -4  -5   35.58    0.51
  -4 -14  -6    3.43    0.32
  -4 -13  -6    0.43    0.40
  -4 -11  -6    5.52    0.46
  -1 -10  -6   92.35    0.91
  -4 -12  -6    1.01    0.43
  -3  -8  -6    1.59    0.56
  -1 -14  -6   41.54    0.63
   0  -7  -5   68.50    0.61
   1 -16  -4    1.96    0.47
   0 -20  -4   38.55    0.51
   0 -16  -5    4.19    0.40
   0  -8  -5   39.17    0.50
  -3 -14  -6    1.41    0.36
  -2 -14  -6    1.18    0.44
  -1 -19  -5    0.33    0.35
   1 -15  -4    4.50    0.35
   0  -9  -5  161.73    0.81
  -5 -11  -5    1.38    0.29
  -4  -6  -5    4.69    0.40
  -1  -6  -5    0.37    0.29
  -2 -19  -5    2.74    0.22
  -3 -18  -5    6.92    0.23
   0  -6  -4 1482.51    1.53
  -4  -8  -5   64.85    0.52
  -1 -15  -5    0.13    0.27
  -4 -15  -5    1.16    0.18
  -4  -9  -5   48.64    0.41
  -2 -17  -5    9.43    0.25
   0 -17  -4   27.58    0.33
  -1 -14  -5    0.42    0.26
   0  -7  -4  594.68    0.94
  -4 -14  -5    1.76    0.20
  -4 -10  -5    1.61    0.21
  -2 -16  -5   83.02    0.52
  -1 -22  -3    9.41    0.20
  -1 -13  -5   67.64    0.48
  -1 -11  -5  853.33    1.42
  -4 -13  -5    7.17    0.22
  -4 -12  -5   17.64    0.30
  -3 -16  -5    2.69    0.17
   0 -16  -4    1.13    0.19
   1 -15  -3   14.63    0.24
  -2  -8  -5   54.42    0.39
  -1 -19  -4   27.34    0.31
   0  -8  -4  324.20    0.69
  -3 -15  -5   90.17    0.53
  -2 -15  -5    9.85    0.25
   0 -15  -4    4.37    0.24
   1 -14  -3   56.65    0.34
  -3 -20  -4    0.73    0.12
  -3 -14  -5    4.66    0.23
  -3  -9  -5   26.34    0.31
  -2 -14  -5   40.81    0.36
  -2  -9  -5  191.17    0.64
   1 -13  -3   70.01    0.35
   1 -10  -3   32.49    0.22
  -2 -13  -5  199.83    0.68
  -2 -10  -5   19.73    0.29
  -1  -5  -4 2160.50    1.53
   0 -14  -4   14.03    0.27
   0  -9  -4  217.13    0.55
   1 -11  -3   83.66    0.33
  -5 -15  -4   41.95    0.31
  -4  -5  -4   53.41    0.33
  -3 -13  -5    0.34    0.16
  -3 -12  -5    5.09    0.22
  -3 -11  -5   53.77    0.40
  -2 -12  -5  103.92    0.50
  -1 -18  -4    0.63    0.17
   0 -19  -3    0.29    0.18
  -2  -4  -4    9.75    0.14
  -1 -21  -3  147.63    0.55
  -5 -14  -4    3.89    0.17
  -5  -9  -4    0.84    0.15
  -4 -18  -4   30.16    0.27
  -3 -19  -4    0.73    0.12
  -2 -19  -4    5.89    0.16
  -5 -13  -4   27.00    0.26
  -5 -10  -4    0.80    0.18
  -5 -12  -4    5.67    0.18
  -5 -11  -4    0.10    0.14
  -1 -17  -4    1.16    0.17
  -4 -17  -4   33.42    0.27
  -4  -6  -4    0.63    0.15
  -3 -18  -4   37.82    0.28
  -2 -18  -4   10.66    0.18
  -2 -21  -3   -0.01    0.09
  -2 -17  -4    1.24    0.15
  -1 -22  -2    4.29    0.12
  -3 -17  -4    7.54    0.14
  -2 -16  -4    4.82    0.16
  -1 -13  -4    0.72    0.16
  -1  -9  -4    0.61    0.10
  -3 -16  -4    3.96    0.14
  -2 -20  -3    4.92    0.12
  -4 -19  -3    3.85    0.11
  -3  -7  -4    0.32    0.10
  -2 -15  -4    0.00    0.11
  -5 -16  -3   12.72    0.17
  -2 -22  -2   34.96    0.23
  -1 -21  -2   72.08    0.33
  -5 -15  -3    0.17    0.11
   1 -12  -2    0.82    0.09
  -3 -13  -4    0.68    0.12
  -3 -12  -4    1.86    0.15
   0 -18  -2    0.16    0.10
  -5 -13  -3   24.38    0.23
  -1 -22  -1    0.48    0.08
  -1 -20  -2   50.60    0.29
  -4 -17  -3    0.80    0.10
  -3 -21  -2   40.99    0.27
  -2 -21  -2   19.02    0.19
  -2 -18  -3    1.00    0.11
  -5 -12  -3   13.69    0.17
  -5 -11  -3   17.11    0.19
  -5 -10  -3    4.83    0.16
  -1 -16  -3  232.64    0.59
   0 -17  -2    0.98    0.13
  -4 -16  -3    5.53    0.14
  -3 -17  -3    6.20    0.16
  -1 -19  -2    0.32    0.14
  -5 -17  -2   17.11    0.21
  -4 -15  -3    7.97    0.17
  -3 -20  -2    1.80    0.12
  -4 -19  -2    8.54    0.16
  -2 -16  -3    1.17    0.15
  -5 -16  -2    1.10    0.13
  -3  -5  -3    0.96    0.11
  -1  -8  -3   31.80    0.21
   6  -2  -1   24.81    0.50
   7  -9  -3   61.75    0.58
   4 -12   1   14.31    0.42
   7  -7  -3   -0.16    0.22
   7  -6  -3   -0.16    0.22
   4  -3   1    0.59    0.27
   6  -3  -1    1.68    0.36
   7  -5  -4   18.19    0.35
   4   1   0   68.52    0.41
   5 -13   0   13.77    0.36
   5  -2   0    1.84    0.36
   4 -11   1    6.62    0.39
   5   1  -1   29.72    0.40
   6 -14  -2    7.39    0.31
   6 -11  -1  103.67    0.66
   7  -7  -4    1.14    0.21
   4  -4   1   78.10    0.47
   4   3  -1   30.65    0.31
   6  -1  -2    1.38    0.36
   4 -10   1    5.49    0.35
   5 -12   0   15.81    0.36
   5  -3   0   23.55    0.44
   6  -5  -1   11.98    0.37
   4  -5   1  443.22    0.96
   6  -8  -1   20.96    0.41
   6  -7  -1   -0.08    0.32
   6  -6  -1    6.85    0.35
   4  -9   1    8.66    0.33
   5 -11   0  320.84    1.02
   6 -13  -2   11.12    0.37
   6   0  -3   -0.30    0.28
   4  -8   1    8.52    0.30
   4  -7   1   12.24    0.30
   5 -15  -1    5.90    0.35
   5  -4   0   20.49    0.44
   5   2  -2   48.58    0.47
   4   4  -2    4.59    0.25
   5 -10   0  713.46    1.46
   5   3  -3    3.40    0.31
   5  -5   0    1.88    0.39
   6 -12  -2    1.40    0.27
   5  -9   0    3.73    0.38
   5  -6   0  297.51    0.93
   6 -14  -3    0.20    0.16
   6  -3  -2    5.61    0.39
   6   0  -5    0.08    0.28
   4  -1   0   65.78    0.41
   5 -14  -1    9.76    0.33
   6 -11  -2    0.49    0.25
   6  -4  -2   12.08    0.39
   5 -16  -2    8.54    0.26
   5   1  -2   13.02    0.32
   6 -13  -3    5.93    0.28
   6 -10  -2    0.75    0.27
   6  -5  -2    4.26    0.32
   6  -2  -3    3.91    0.36
   6  -9  -2    6.73    0.35
   6  -8  -2    0.55    0.33
   6  -7  -2    0.11    0.33
   6  -1  -4   26.74    0.40
   5 -13  -1    5.17    0.31
   5  -2  -1    5.45    0.34
   5   2  -3   38.61    0.42
   4 -13   0  198.67    0.70
   6 -12  -3   11.07    0.31
   3  -9   1    5.17    0.21
   6  -2  -4  111.15    0.67
   5 -15  -2    1.01    0.29
   5  -3  -1    3.45    0.35
   5   0  -2   -0.10    0.30
   6 -11  -3   22.43    0.39
   6  -4  -3    7.19    0.45
   4  -3   0    3.36    0.25
   6  -2  -5   12.43    0.34
   5 -11  -1  202.39    0.84
   6 -10  -3    0.44    0.26
   6  -5  -3    1.14    0.29
   5   2  -4  163.63    0.66
   6 -12  -4    1.47    0.22
   6  -9  -3    0.92    0.27
   6  -6  -3   12.13    0.36
   4  -4   0    7.27    0.27
   5 -16  -3   28.48    0.37
   5   1  -3   22.84    0.36
   6  -8  -3    4.91    0.33
   6  -7  -3    8.01    0.34
   6  -3  -5   35.12    0.42
   5 -14  -2    0.70    0.29
   5  -6  -1    1.39    0.38
   6 -11  -4   14.35    0.29
   6  -4  -4   24.50    0.42
   4 -15  -1    1.07    0.32
   4 -10   0   76.77    0.46
   5  -7  -1    1.65    0.38
   6 -11  -5   -0.07    0.19
   6 -10  -4   -0.24    0.21
   6  -5  -6   -0.32    0.24
   6  -4  -5    4.15    0.29
   6 -10  -5    3.03    0.23
   6  -9  -4   10.43    0.28
   6  -8  -4   25.17    0.40
   6  -7  -4   20.04    0.38
   6  -6  -6   15.68    0.28
   6  -5  -5    0.34    0.31
   5 -15  -3   19.98    0.37
   5 -13  -2    4.41    0.33
   5   0  -3   13.57    0.37
   5   1  -4   22.21    0.36
   6  -9  -5    1.13    0.20
   6  -8  -5   18.69    0.33
   6  -7  -5    7.99    0.30
   4 -14  -1    2.38    0.32
   4   3  -3    5.59    0.25
   5   1  -5    6.65    0.34
   4 -16  -2    2.33    0.35
   5 -14  -3   26.96    0.38
   5  -1  -3   22.53    0.37
   4 -13  -1    0.13    0.33
   5   0  -4    0.16    0.35
   5 -13  -3  133.73    0.68
   5   0  -5   25.40    0.36
   5 -14  -4    7.50    0.26
   4 -15  -2    1.56    0.33
   4   2  -3    3.91    0.21
   5  -1  -6   25.33    0.41
   4   0  -2    0.24    0.20
   5 -14  -5  187.14    0.73
   5 -13  -4    5.83    0.27
   5  -4  -3    2.92    0.35
   5  -1  -5    6.77    0.28
   5  -3  -7   -0.07    0.21
   5  -2  -4  160.10    0.68
   4 -17  -4    0.56    0.23
   4 -16  -3    0.00    0.28
   4 -14  -2    3.02    0.29
   5 -13  -5   14.56    0.29
   5 -12  -4    7.83    0.27
   5  -9  -3    5.38    0.29
   5  -4  -7    4.80    0.27
   4   1  -3    7.03    0.25
   5  -8  -3    0.59    0.30
   5  -3  -4   18.14    0.37
   4   2  -4    0.48    0.24
   5 -12  -5   13.65    0.30
   5 -11  -4    0.16    0.32
   4 -13  -2   12.73    0.35
   5  -3  -6   46.37    0.42
   5 -11  -6    7.01    0.23
   5 -10  -4   13.82    0.34
   5  -8  -7   13.46    0.27
   5  -7  -7    0.41    0.20
   5  -3  -5   37.62    0.41
   5 -11  -5    9.56    0.26
   5  -9  -4   16.97    0.40
   5  -5  -4   85.15    0.58
   5  -4  -6  123.68    0.65
   4 -16  -4    9.78    0.30
   5 -10  -6    0.11    0.19
   5  -6  -4   18.26    0.36
   5  -4  -5   57.06    0.49
   4   0  -3   -0.18    0.24
   5 -10  -5    1.23    0.21
   5  -9  -6    0.21    0.22
   5  -5  -6   45.21    0.44
   4 -16  -5    1.01    0.25
   4  -3  -2    4.20    0.23
   5  -9  -5   30.08    0.38
   5  -8  -6    1.61    0.22
   5  -6  -6   10.00    0.30
   4 -11  -2  157.89    0.69
   4   1  -4    9.34    0.29
   5  -8  -5   13.94    0.34
   5  -7  -5    0.70    0.25
   3 -12  -1    0.39    0.26
   4   1  -5    8.18    0.29
   3 -17  -3    6.45    0.28
   4 -13  -3    9.77    0.33
   3 -15  -2    3.88    0.29
   4 -15  -5   94.59    0.54
   4  -7  -2    3.08    0.28
   4 -14  -4   43.33    0.50
   3 -11  -1    0.81    0.21
   4 -14  -6    4.77    0.22
   4   0  -6  170.06    0.67
   4   0  -5   -0.22    0.30
   3 -16  -3   25.15    0.40
   4 -11  -3  551.49    1.20
   4  -4  -8   68.22    0.47
   4  -3  -3    5.66    0.27
   3 -17  -4   -0.03    0.24
   3 -14  -2    9.43    0.29
   4  -1  -4    9.24    0.25
   3  -9  -1  141.05    0.49
   4 -12  -7    9.18    0.24
   4 -10  -3  448.45    1.08
   3  -8  -1    6.12    0.21
   3  -7  -1   32.94    0.28
   4  -7  -8   16.17    0.31
   4  -4  -3    1.36    0.25
   4  -1  -6   83.50    0.53
   3 -17  -5    5.25    0.26
   4 -12  -4   10.03    0.35
   4  -9  -3   45.58    0.45
   4  -5  -3    8.99    0.30
   4  -2  -4    0.70    0.31
   4  -1  -5    8.42    0.29
   3 -13  -2    0.41    0.29
   4 -11  -7    0.97    0.19
   4  -8  -3   51.19    0.47
   4  -7  -3   16.80    0.36
   4  -6  -3  155.05    0.63
   3 -15  -3    7.01    0.28
   4 -12  -6   23.00    0.32
   4 -11  -4   26.92    0.39
   4  -3  -7   10.94    0.28
   3 -16  -4    8.06    0.29
   4 -10  -7    0.53    0.18
   4  -2  -6  314.23    0.90
   4 -10  -4  159.97    0.73
   4  -4  -7   15.89    0.32
   3 -12  -2   16.40    0.32
   4 -11  -6   51.97    0.43
   4 -11  -5   19.18    0.36
   4  -4  -4  143.44    0.65
   2 -13  -1    0.87    0.21
   3 -16  -6    0.61    0.18
   3 -16  -5    1.64    0.27
   4  -9  -4   45.79    0.47
   4  -8  -7    4.16    0.25
   4  -6  -7   13.24    0.30
   4  -3  -6  477.29    1.12
   4 -10  -6    0.35    0.23
   4  -8  -4  115.20    0.64
   4  -5  -4  673.28    1.25
   4  -9  -6   10.77    0.36
   4  -7  -4  187.79    0.74
   4  -6  -4  888.16    1.46
   4  -4  -6   35.96    0.41
   3 -11  -2  169.29    0.60
   4  -9  -5   14.91    0.32
   4  -5  -6    0.45    0.36
   4  -8  -5   44.38    0.45
   4  -7  -6   56.68    0.49
   4  -7  -5    4.19    0.40
   4  -6  -5  123.81    0.69
   4  -5  -5  157.84    0.71
   3 -10  -2   73.15    0.44
   2 -18  -5    3.99    0.21
   3 -15  -5   41.67    0.43
   3 -14  -4  116.17    0.61
   2 -11  -1    0.25    0.19
   3  -8  -2   23.85    0.28
   3   1  -4    0.42    0.16
   3 -14  -6   24.53    0.36
   3 -12  -3   64.46    0.47
   3 -11  -8    0.28    0.19
   3  -2  -8   78.74    0.55
   2 -16  -3   31.28    0.36
   3 -13  -7   42.90    0.41
   2 -17  -6   39.87    0.38
   3  -3  -8    2.85    0.25
   3   1  -5    1.46    0.19
   2 -17  -5    2.38    0.25
   3 -13  -6   38.82    0.43
   3 -12  -7   33.73    0.36
   3  -9  -8    0.14    0.22
   2 -16  -7   45.48    0.38
   3 -13  -5   17.07    0.37
   3  -4  -8   26.34    0.38
   3   0  -4   -0.29    0.18
   3 -10  -3   61.06    0.45
   3  -5  -8    1.14    0.27
   3  -1  -7  121.20    0.61
   2 -15  -3   35.11    0.39
   3 -11  -7    5.38    0.22
   3   0  -6    0.26    0.28
   2 -16  -4    4.47    0.22
   2 -13  -2  242.16    0.68
   3 -12  -6   65.15    0.52
   3  -9  -3   60.53    0.42
   3  -3  -3  540.86    0.90
   3   0  -5   12.14    0.28
   2 -16  -6   24.34    0.36
   3 -12  -5  210.94    0.82
   3  -1  -4    0.46    0.18
   3 -11  -4   82.78    0.54
   3 -10  -7    5.75    0.26
   3  -8  -3  120.11    0.52
   3  -4  -3  284.37    0.69
   3 -11  -6    3.00    0.28
   3  -7  -3  282.36    0.73
   3  -6  -3   30.26    0.30
   3  -5  -3   10.74    0.25
   3  -1  -6    0.47    0.30
   3 -11  -5    9.59    0.32
   3 -10  -4   57.02    0.48
   3  -3  -7   18.44    0.31
   3  -1  -5    1.73    0.25
   1 -18  -5    1.47    0.25
   2 -14  -3    3.05    0.28
   2 -13  -8   26.44    0.33
   2 -12  -2   27.49    0.28
   3  -8  -7    9.33    0.29
   3  -4  -7  105.80    0.62
   2 -15  -4  204.65    0.76
   2  -9  -9   -0.08    0.13
   3 -10  -6    3.20    0.27
   3  -5  -7    2.54    0.35
   3  -2  -6    0.16    0.26
   2 -15  -6   44.48    0.45
   3 -10  -5   29.58    0.40
   3  -9  -4   36.51    0.41
   2 -15  -5   36.75    0.43
   2 -14  -7   46.79    0.42
   2  -8  -9    1.45    0.18
   2  -4  -9   20.87    0.31
   3  -9  -6    8.98    0.29
   3  -8  -4   97.98    0.54
   2 -12  -8    0.28    0.17
   2 -11  -2  400.49    0.82
   2  -7  -9    0.17    0.23
   2  -6  -9    5.83    0.24
   2  -5  -9    0.19    0.22
   3  -9  -5  139.28    0.69
   3  -7  -4  381.84    0.93
   3  -3  -6  140.90    0.63
   3  -8  -5   36.06    0.48
   3  -6  -4  135.76    0.57
   3  -5  -4   18.91    0.30
   3  -4  -6  566.33    1.21
   3  -3  -5    0.90    0.25
   2 -13  -3    9.16    0.25
   3  -6  -6    5.73    0.34
   1 -17  -6    0.75    0.22
   2 -11  -8    0.14    0.20
   3  -7  -5    5.86    0.33
   3  -6  -5  129.70    0.62
   3  -5  -5  405.43    0.98
   2 -13  -7   12.11    0.28
   2 -10  -2  136.83    0.48
   1 -17  -5   10.62    0.26
   1 -16  -7    0.43    0.17
   2 -14  -5   79.39    0.55
   2 -10  -8    1.92    0.19
   2 -12  -3   52.34    0.39
   2  -9  -2   16.36    0.24
   2 -13  -6    0.74    0.23
   2 -13  -4  180.70    0.71
   2 -12  -7   37.82    0.40
   1 -14  -8    2.34    0.18
   2  -9  -8   19.57    0.33
   2  -2  -8   89.14    0.59
   0 -18  -6    0.20    0.17
   1 -16  -6   35.24    0.41
   1 -16  -4    2.18    0.27
   2  -8  -8   37.45    0.41
   2 -11  -7    3.62    0.27
   2  -3  -8   59.86    0.47
   1 -16  -5   14.95    0.33
   1 -15  -3   11.98    0.31
   2 -12  -6   34.98    0.43
   2  -6  -8   27.53    0.44
   2  -4  -8   21.29    0.37
   1 -10  -9    0.10    0.17
   2  -5  -8   66.11    0.50
   2   0  -7    0.01    0.28
   2 -12  -5   24.12    0.40
   2 -10  -7   16.25    0.34
   1 -13  -2   24.39    0.28
   1  -9  -9   12.17    0.26
   2 -11  -6  108.19    0.62
   2   1  -6   29.65    0.33
   1 -15  -6   45.67    0.46
   1 -14  -7    0.16    0.19
   2 -11  -4  114.24    0.57
   2  -9  -7   54.68    0.48
   2  -1  -7  113.12    0.57
   1 -15  -4    3.00    0.26
   1 -12  -8   22.62    0.33
   1  -8  -9   20.85    0.34
   2  -9  -3   27.15    0.29
   4 -12  -2    1.00    0.39
   5 -13  -5   16.77    0.45
   5  -8  -2  153.18    1.02
   5   2  -2   46.30    0.52
   6  -8  -5   18.31    0.44
   6   2  -6    5.35    0.31
   5 -12  -4    8.16    0.40
   6  -6  -4    1.46    0.36
   5  -7  -2  114.78    0.85
   5   1  -2   13.37    0.44
   6  -5  -4   20.92    0.50
   5 -10  -3  101.82    0.81
   5   4  -3    2.93    0.43
   6  -4  -4   24.63    0.52
   6  -3  -4   55.52    0.67
   6   1  -5    0.25    0.38
   4 -13  -3    8.94    0.47
   5  -6  -2  222.51    1.07
   6  -7  -6   38.62    0.53
   6   1  -6   35.45    0.51
   4   1  -1   32.00    0.37
   5 -12  -5   14.84    0.42
   6  -6  -5   12.18    0.37
   4 -14  -4   43.18    0.59
   5 -12  -6   10.95    0.32
   5 -11  -4    0.23    0.41
   5  -5  -2   54.14    0.65
   5  -1  -2   13.50    0.45
   6  -6  -6   18.32    0.39
   6   0  -6    0.42    0.35
   3 -10  -1    0.43    0.29
   4  -6  -1   89.63    0.60
   5  -9  -3    5.47    0.48
   5  -4  -2   31.59    0.57
   5  -2  -2   47.64    0.59
   6  -5  -6    0.05    0.28
   6  -4  -5    4.26    0.39
   6  -1  -5    0.53    0.33
   5   3  -3    3.19    0.35
   6  -4  -6   47.68    0.55
   6  -3  -5   31.84    0.51
   4  -5  -1    0.69    0.31
   6  -2  -6    5.71    0.30
   4 -10  -2   17.28    0.44
   4  -4  -1    2.51    0.33
   4  -2  -1  110.39    0.64
   4  -1  -1   32.35    0.40
   5  -8  -3   -0.05    0.43
   4 -14  -5  116.67    0.74
   4 -12  -3   44.62    0.54
   4  -3  -1   31.54    0.41
   5 -11  -5   10.38    0.37
   5 -11  -6    6.68    0.30
   5   2  -3   37.28    0.47
   3 -12  -2   15.86    0.40
   3  -9  -1  140.81    0.63
   4 -13  -4  128.68    0.77
   5  -7  -3  364.85    1.31
   4  -9  -2 1303.46    2.09
   5  -9  -4   19.99    0.50
   5   0  -3   14.40    0.51
   3  -8  -1    5.67    0.33
   4 -11  -3  556.79    1.46
   4   3  -2    4.12    0.26
   5  -8  -4   -0.22    0.32
   5  -4  -3    2.62    0.45
   4 -13  -5  143.01    0.81
   5  -9  -7    2.52    0.21
   3 -11  -2  169.01    0.73
   4 -13  -6   28.53    0.44
   4 -12  -4    9.67    0.35
   3  -7  -1   33.41    0.36
   4   2  -2   10.98    0.33
   5  -7  -4    9.81    0.38
   5   2  -4  167.04    0.82
   4 -10  -3  459.39    1.31
   5  -8  -7   15.78    0.35
   5  -8  -5   14.88    0.41
   5  -6  -4   19.47    0.43
   5   1  -4   23.92    0.48
   5   3  -5   41.27    0.56
   5  -8  -6    1.46    0.32
   4 -12  -7    7.68    0.28
   5  -5  -4   83.17    0.68
   5   0  -4   -0.21    0.43
   5   3  -6   48.72    0.55
   4 -11  -4   29.41    0.46
   4  -5  -2   96.03    0.58
   5  -7  -7    0.59    0.22
   5  -7  -5    0.42    0.33
   5  -4  -4   39.05    0.53
   3 -10  -2   71.00    0.48
   4 -12  -6   24.87    0.44
   4  -4  -2    4.20    0.30
   5  -7  -6    2.80    0.33
   5  -2  -4  161.28    0.88
   5   2  -5    2.88    0.30
   3 -12  -3   63.69    0.54
   4  -1  -2    2.14    0.27
   4   4  -3    1.39    0.26
   5  -6  -7    0.68    0.26
   5  -6  -5    1.53    0.34
   5   1  -7    0.37    0.30
   5   1  -5    6.76    0.35
   5   2  -6    3.10    0.30
   5  -6  -6    9.00    0.32
   5  -5  -7   15.35    0.36
   3 -13  -4   23.29    0.42
   4 -11  -7    0.98    0.27
   4 -11  -5   20.25    0.46
   4 -10  -4  160.95    0.84
   4  -8  -3   52.28    0.53
   5  -4  -5   54.86    0.57
   5   1  -6   26.56    0.44
   3  -9  -2   18.66    0.36
   5  -5  -6   44.49    0.52
   5  -4  -7    4.83    0.25
   5  -3  -7   -0.10    0.28
   5  -3  -5   38.71    0.52
   5  -2  -5    3.46    0.38
   4 -11  -6   51.86    0.53
   5  -4  -6  116.17    0.76
   5   0  -6   -0.03    0.33
   4  -7  -3   16.50    0.41
   5  -3  -6   41.67    0.53
   5  -1  -6   26.74    0.49
   3 -11  -3  102.29    0.61
   4 -10  -5   18.60    0.50
   3 -13  -5   17.01    0.43
   3  -8  -2   23.77    0.35
   4 -10  -7    0.32    0.23
   4  -6  -3  150.59    0.74
   4   2  -3    4.31    0.26
   3 -13  -7   45.48    0.48
   4 -10  -6    0.30    0.29
   3 -12  -4   53.73    0.50
   4  -8  -4  117.24    0.77
   4  -5  -3    8.66    0.35
   4   1  -3    7.38    0.30
   3 -13  -6   41.66    0.45
   4  -8  -8    1.35    0.22
   4   4  -4  137.59    0.68
   4  -9  -7    1.59    0.28
   4  -4  -3    1.31    0.30
   3 -10  -3   60.33    0.46
   4  -2  -3    4.76    0.30
   4  -1  -3    7.30    0.30
   4  -9  -6    9.95    0.33
   4  -7  -4  186.48    0.87
   4  -7  -8   13.70    0.31
   4   3  -4    4.11    0.33
   3 -12  -7   33.85    0.44
   3 -11  -4   80.18    0.57
   4  -8  -7    3.89    0.27
   4  -8  -5   44.20    0.53
   4   3  -8    7.89    0.28
   2 -12  -3   52.96    0.45
   3 -11  -8    0.45    0.20
   4  -6  -4  861.55    1.70
   3 -12  -6   65.29    0.55
   3  -9  -3   62.69    0.46
   4  -8  -6   16.34    0.38
   4  -6  -8   17.34    0.34
   4   2  -4    0.85    0.28
   4   4  -7   16.66    0.41
   4   4  -5   19.33    0.39
   3  -5  -2    7.92    0.24
   4  -7  -5    4.26    0.37
   4  -5  -4  647.94    1.48
   4   2  -8  157.59    0.82
   4  -7  -7   63.93    0.57
   4  -5  -8    3.25    0.24
   4   4  -6   33.53    0.46
   4  -7  -6   54.96    0.56
   4  -4  -4  138.56    0.74
   4   1  -8    1.76    0.32
   4   1  -4    9.48    0.32
   3 -11  -7    5.16    0.33
   3 -11  -5    9.79    0.38
   3 -10  -4   59.46    0.54
   4  -6  -7   12.55    0.38
   4  -6  -5  114.45    0.73
   4  -4  -8   63.60    0.56
   4   3  -7   11.11    0.34
   4   3  -5   14.92    0.35
   3 -10  -8   -0.16    0.20
   3  -8  -3  119.54    0.58
   4  -3  -8    8.05    0.30
   4  -2  -4    0.78    0.32
   4  -1  -8    1.93    0.25
   4  -1  -4    9.07    0.36
   3 -11  -6    3.05    0.34
   4  -6  -6   13.26    0.38
   4  -5  -5  150.48    0.84
   4   3  -6  476.80    1.29
   4  -5  -7   19.34    0.39
   4   2  -5   10.34    0.34
   2 -13  -7   13.18    0.34
   4  -4  -7   13.06    0.43
   4  -4  -5   20.06    0.47
   4   1  -5    7.35    0.40
   2 -13  -5   64.57    0.53
   3  -7  -3  278.28    0.85
   4  -3  -5   15.26    0.44
   4   2  -6  314.68    1.08
   2 -12  -8    0.24    0.23
   3 -10  -7    5.15    0.30
   3 -10  -5   29.25    0.45
   3  -9  -4   36.06    0.44
   3  -7  -9    2.13    0.19
   4  -4  -6   33.73    0.46
   4  -3  -7    9.83    0.36
   4  -2  -7   35.80    0.50
   4  -2  -5   10.51    0.40
   4  -1  -5    7.47    0.39
   4   0  -7    0.03    0.32
   4   0  -5   -0.20    0.34
   4   1  -6   80.64    0.64
   2 -13  -6    0.91    0.30
   2 -12  -4    4.74    0.29
   3 -10  -6    3.10    0.33
   4  -2  -6  324.40    1.16
   4   0  -6  163.96    0.84
   3  -6  -3   31.24    0.36
   3  -8  -8    7.44    0.31
   2 -10  -3   21.42    0.31
   3  -9  -5  132.18    0.75
   2 -12  -7   38.03    0.46
   3  -5  -3   10.91    0.29
   2 -12  -5   23.81    0.42
   2 -11  -8    0.34    0.28
   3  -4  -9   18.52    0.35
   2 -12  -6   34.02    0.42
   2 -11  -4  117.50    0.61
   3  -8  -7    9.81    0.37
   3  -7  -4  375.36    1.05
   3  -4  -3  281.39    0.80
   3   5  -4   17.90    0.33
   2  -9  -9   -0.01    0.15
   3  -8  -5   31.98    0.47
   3  -2  -9   12.72    0.31
   3  -1  -9   59.89    0.57
   3   0  -9   17.50    0.36
   3  -8  -6    0.30    0.44
   3  -6  -8   11.37    0.35
   3  -2  -3  293.32    0.79
   3  -1  -3    0.14    0.25
   3   4  -8   25.66    0.43
   2 -11  -7    3.54    0.33
   2  -9  -3   26.99    0.32
   3  -7  -7   21.58    0.41
   3  -6  -4  129.30    0.64
   2 -11  -5    1.35    0.33
   2 -10  -8    2.03    0.25
   3  -7  -5    5.40    0.36
   3  -5  -8    0.95    0.23
   3   4  -4    0.23    0.21
   3   5  -7    2.73    0.32
   2  -8  -9    1.63    0.20
   3   3  -8    2.37    0.30
   1 -12  -8   23.52    0.37
   2 -11  -6  107.30    0.66
   2 -10  -4   -0.08    0.25
   3  -6  -7   27.18    0.49
   3  -5  -4   17.97    0.33
   3  -4  -8   24.14    0.41
   3   5  -5  373.81    0.99
   3   5  -6  188.10    0.81
   3  -4  -4    0.23    0.25
   3  -3  -8    2.83    0.28
   3   4  -7  103.53    0.70
   2  -9  -8   22.66    0.39
   2  -8  -3    0.45    0.24
   3  -6  -6    5.96    0.41
   3  -5  -7    2.61    0.31
   3  -2  -8   74.92    0.63
   3   0  -8    0.03    0.31
   2 -10  -7   17.74    0.40
   3  -3  -4    0.02    0.24
   3   2  -4   29.81    0.34
   3   4  -5  157.58    0.69
   2 -10  -5    2.05    0.33
   3  -5  -6  188.82    0.98
   3  -5  -5  366.50    1.13
   3  -4  -7   93.40    0.72
   3   4  -6  523.81    1.32
   2 -10  -6   11.47    0.35
   2  -6  -9    5.58    0.28
   3  -2  -4   30.61    0.37
   3  -1  -4    0.38    0.23
   1 -12  -7    3.25    0.32
   2  -9  -4  103.58    0.55
   3   2  -7   90.71    0.67
   3   3  -5    0.32    0.26
   1 -11  -8   26.49    0.43
   2  -8  -8   37.21    0.45
   3  -4  -6  530.74    1.45
   3  -2  -7   86.17    0.68
   3   1  -7  117.43    0.78
   3   3  -6  139.60    0.73
   2  -9  -7   54.73    0.58
   2  -7  -3   24.39    0.29
   2  -5  -9    0.13    0.25
   3  -1  -7  117.68    0.78
   3   2  -5   34.38    0.42
   1 -12  -5   23.92    0.46
   1  -9  -9   11.24    0.30
   3  -3  -6  139.82    0.80
   3  -2  -5   34.16    0.45
   3   2  -6    0.09    0.31
   1 -12  -6   30.38    0.45
   2  -9  -5    1.44    0.37
   3  -2  -6    0.35    0.37
   3  -1  -5    1.50    0.32
   3   1  -5    1.86    0.29
   2  -9  -6   73.69    0.61
   2  -7  -8   24.26    0.42
   2  -4  -9   22.00    0.37
   3  -1  -6    1.06    0.35
   2  -8  -4    9.30    0.27
   2  -3  -9   49.39    0.52
   1 -11  -7   53.49    0.53
   1 -10  -8   52.09    0.53
   2  -1  -9   22.77    0.40
   2   0  -9   -0.01    0.22
   2  -8  -5   28.63    0.44
   2  -7  -7   33.34    0.53
   2   5  -8   67.80    0.63
   1 -11  -6    0.25    0.32
   1 -11  -5    7.08    0.38
   2  -5  -8   57.04    0.63
   1  -7  -9   23.30    0.42
   1  -2 -10   15.70    0.34
   1  -1 -10    0.85    0.18
   1   0 -10   -0.11    0.17
   2  -4  -8   22.03    0.46
   2   4  -8   22.86    0.43
   0 -11  -8   87.16    0.65
   1 -10  -7   15.21    0.39
   2  -7  -6   68.38    0.62
   2  -7  -5   17.88    0.40
   2  -6  -7    4.09    0.37
   0 -12  -7    8.09    0.38
   2  -6  -4    0.97    0.27
   2  -3  -8   59.56    0.64
   2  -5  -7    0.45    0.36
   2  -2  -8   89.11    0.72
   2   2  -8   95.65    0.73
   1 -10  -6   20.53    0.42
   2  -6  -6    5.09    0.41
   2  -6  -5   54.86    0.52
   2   1  -8    2.21    0.38
   2   5  -7    0.83    0.36
   1 -10  -5   16.60    0.37
   1  -5  -9   13.16    0.35
   2  -5  -4  221.94    0.78
   1  -9  -7   15.22    0.45
   2  -4  -7    1.84    0.37
   2   6  -6    6.30    0.39
   1   5  -9   14.53    0.37
   2  -5  -6   63.61    0.63
   0 -10  -8   72.34    0.65
   0  -8  -9    0.93    0.25
   1  -7  -8   14.81    0.44
   1  -4  -9   11.43    0.35
   2  -5  -5  221.79    0.87
   2  -3  -7   16.95    0.46
   0 -11  -7   -0.29    0.35
   1  -9  -4   22.42    0.36
   2  -4  -4  126.85    0.62
   1  -3  -9   12.70    0.36
   1   4  -9   13.64    0.41
   2  -4  -6   24.49    0.51
   2  -2  -7   39.96    0.61
   2   3  -7   17.45    0.44
   2   5  -6   66.75    0.57
   0  -3 -10    0.33    0.22
   1  -9  -6  148.37    0.84
   1  -8  -7   40.44    0.64
   2  -4  -5   83.90    0.58
   2  -1  -7  117.93    0.84
   2   2  -7   41.61    0.57
   2   5  -5  236.08    0.84
  -1 -11  -8  103.38    0.69
   1  -6  -8    0.71    0.39
   1  -2  -9   58.41    0.62
   1   3  -9   13.26    0.43
   2   0  -7   -0.20    0.42
   2   1  -7  118.35    0.81
  -1  -9  -9    0.38    0.23
   1  -1  -9   91.27    0.77
   2  -3  -6  159.92    0.88
   2   4  -6   25.60    0.43
   0  -9  -8  156.09    0.94
   0  -1 -10    5.90    0.29
   1   0  -9   18.55    0.41
   2  -3  -5  219.11    0.86
   2  -2  -4  221.43    0.76
   2   4  -5   83.94    0.55
   0 -11  -6  185.34    0.89
   0   0 -10    9.94    0.31
   2  -2  -6   10.73    0.44
   2   3  -6  158.26    0.80
   1  -7  -7   35.04    0.59
   1  -5  -8    0.19    0.35
   2  -2  -5  149.30    0.74
   2  -1  -6   33.32    0.52
   2  -1  -4   25.47    0.35
   2   2  -6   11.12    0.40
   0 -10  -7   16.05    0.41
   0  -6  -9   18.15    0.41
   1  -8  -4   87.80    0.55
   1   6  -8    1.26    0.42
   2   0  -6    7.15    0.40
   2   3  -5  218.07    0.82
   2  -1  -5   18.54    0.38
   2   2  -5  145.06    0.69
   1  -8  -5   21.94    0.40
   2   0  -5   -0.28    0.28
  -1 -10  -8  117.65    0.80
   0  -8  -8   15.47    0.49
   1   5  -8    0.11    0.35
   0  -5  -9   32.26    0.51
   1  -6  -7   52.50    0.68
   1  -3  -8    0.90    0.38
  -1 -11  -7    5.27    0.43
   0  -9  -7   70.15    0.71
   0   6  -9   17.17    0.43
   1  -7  -4    2.74    0.29
   1  -2  -8   -0.22    0.37
   1   4  -8   16.74    0.45
   0  -4  -9   21.05    0.45
   1  -7  -5   97.35    0.68
   1  -5  -7    3.16    0.50
   1   3  -8    0.96    0.47
  -1  -7  -9   59.30    0.65
   1  -1  -8   14.21    0.46
   1   2  -8    0.15    0.52
   2   7  -8   25.91    0.41
   4  -2  -4    0.35    0.19
   4   0  -7    0.04    0.19
   2   8  -5   32.64    0.31
   3   2  -9   10.92    0.24
   3   4  -8   22.25    0.35
   4  -7  -7   61.16    0.45
   4   0  -5    0.02    0.22
   2   8  -6    1.53    0.21
   3   5  -7    2.36    0.24
   4  -1  -7    0.85    0.18
   4   0  -6  170.19    0.73
   2   5  -9    0.03    0.18
   3   5  -5  410.29    0.96
   4  -6  -7   11.80    0.25
   2   7  -4    4.84    0.16
   3   1  -9   42.81    0.43
   3   4  -4    0.17    0.16
   4  -7  -6   56.55    0.41
   4  -4  -7   14.95    0.30
   4  -3  -7   11.39    0.27
   4  -2  -5   10.66    0.29
   3   2  -3  291.03    0.64
   4  -6  -5  117.43    0.51
   4  -3  -5   15.66    0.29
   4  -2  -6  322.98    0.94
   3   3  -8    2.45    0.18
   4  -6  -6   14.20    0.25
   4  -5  -5  154.96    0.58
   4  -4  -5   18.99    0.26
   4  -3  -6  466.32    1.08
   2   7  -7   31.14    0.34
   3   0  -9    9.78    0.24
   4  -5  -6    0.08    0.16
   4  -4  -6   33.71    0.33
   2   7  -5   17.19    0.24
   3   3  -4    0.49    0.16
   3   4  -6  538.97    1.14
   3   4  -5  157.25    0.59
   3  -2  -9   10.34    0.23
   3   1  -3    0.13    0.13
   3  -6  -9    0.52    0.09
   1   7  -8   15.77    0.27
   2   5  -8   59.03    0.46
   3   2  -4   28.83    0.26
   3   3  -6  134.48    0.59
   2   6  -5   49.23    0.36
   3   0  -8   -0.09    0.17
   2   6  -6    4.83    0.23
   3  -9  -8    0.10    0.12
   3   1  -4    0.18    0.16
   3  -8  -8    6.47    0.20
   3  -7  -8    0.98    0.18
   3  -6  -8   10.41    0.26
   3   0  -4   -0.05    0.15
   3  -5  -8    0.47    0.19
   2   0  -9    0.09    0.14
   2   4  -7    1.35    0.25
   3   0  -6    0.15    0.24
   3  -1  -4    0.40    0.16
   3   0  -5   11.97    0.25
   3  -8  -7    9.52    0.25
   3  -2  -7   81.36    0.57
   1   5  -8   -0.30    0.22
   2   2  -8   70.55    0.54
   3  -3  -7   18.23    0.35
   3  -2  -4   29.04    0.29
   3  -1  -6    0.57    0.26
   1  -1 -10    0.83    0.14
   2   4  -6   23.18    0.34
   3  -7  -7   21.13    0.31
   3  -1  -5    1.64    0.22
   2  -2  -9    5.07    0.21
   2   3  -7   16.86    0.42
   2   4  -5   79.46    0.45
   3  -9  -6    8.62    0.29
   3  -6  -7   26.05    0.36
   3  -5  -7    2.63    0.25
   2  -8  -9    1.50    0.19
   3  -2  -6   -0.02    0.26
   2  -7  -9   -0.03    0.16
   2   1  -8    1.94    0.24
   3  -7  -4  372.65    0.82
   3  -4  -4    0.22    0.17
   0   6  -8   -0.07    0.27
   2  -5  -9    0.15    0.18
   3  -8  -5   34.36    0.37
   3  -6  -4  136.48    0.52
   3  -5  -4   18.17    0.25
   3  -3  -5    0.19    0.28
   0   4  -9   22.91    0.39
   0   7  -7  132.10    0.68
   1   4  -8   15.35    0.36
   1   6  -6   67.31    0.48
   2   3  -4   68.62    0.42
   3  -7  -6   51.09    0.45
   3  -6  -6    6.10    0.31
   3  -5  -6  194.20    0.80
   3  -4  -6  545.70    1.28
   2   2  -7   40.28    0.48
   2   3  -6  156.88    0.72
   3  -7  -5    5.65    0.26
   3  -4  -5  163.41    0.67
   1   6  -5   29.09    0.31
   2   3  -5  213.38    0.72
   3  -6  -5  127.60    0.60
   3  -5  -5  387.33    0.99
   0   0 -10    9.27    0.25
   1   3  -8    0.57    0.40
   2   1  -7  119.59    0.75
   0   3  -9    6.45    0.35
   0   5  -8   20.38    0.40
   2   2  -6   11.27    0.37
   1   5  -6  115.21    0.67
   2  -9  -8   20.10    0.44
   0   6  -7    8.30    0.36
   2   0  -7    0.34    0.40
   0  -2 -10   -0.05    0.18
   1  -1  -9   93.14    0.77
   2  -7  -8   25.63    0.57
   2  -5  -8   60.56    0.65
   2   1  -6   34.55    0.50
   1  -2  -9   52.09    0.62
   2 -11  -7    4.03    0.41
   2   1  -4   26.34    0.36
   0   4  -8   24.16    0.50
   2   1  -5   20.24    0.38
   1  -3  -9   14.37    0.40
  -1   3  -9   25.83    0.52
   1  -9  -9   12.49    0.36
   2 -10  -7   14.48    0.51
   2   0  -6    7.31    0.44
  -1   5  -8   11.96    0.46
   0   1  -9   20.39    0.48
   1  -8  -9   21.95    0.49
   0   5  -7    4.95    0.41
   1  -7  -9   27.41    0.55
   1  -6  -9    4.49    0.40
   1   4  -5  278.51    0.96
   2  -1  -6   36.36    0.58
   2   0  -5   -0.10    0.32
   0   3  -8   21.73    0.61
   1   0  -8    0.16    0.37
   2  -8  -7   62.91    0.73
   2  -6  -7    4.17    0.48
  -1   2  -9   19.55    0.57
   2  -1  -4   25.59    0.40
   0  -1  -9   15.85    0.57
   2 -10  -6   12.73    0.55
  -1   4  -8    6.13    0.59
   0   5  -6   25.49    0.51
   1  -2  -8   -0.34    0.47
   1   1  -7   17.23    0.65
   2  -9  -6   80.52    0.85
  -2   2  -9    2.50    0.44
  -1   1  -9   59.18    0.84
   0  -2  -9   48.38    0.83
   1 -10  -8   50.24    0.84
   1   2  -6  103.51    0.86
   2  -8  -6    1.66    0.44
   2  -7  -6   68.90    0.88
   2  -6  -6    5.25    0.67
   2 -10  -5    1.59    0.60
  -1   5  -7  121.92    1.01
   0  -3  -9    6.15    0.49
   1  -9  -8    0.34    0.48
   1  -4  -8   15.95    0.62
  -1   0  -9   60.39    0.91
   1  -8  -8   15.66    0.67
   1  -5  -8    0.27    0.51
  -1   3  -8    5.38    0.49
   0   3  -7   11.03    0.62
   0   5  -5   13.81    0.44
   0  -8  -9    1.01    0.37
   0  -7  -9    6.50    0.50
   0  -6  -9   16.90    0.61
   1   2  -5  315.25    1.27
   2  -8  -5   30.65    0.61
   2  -7  -5   18.23    0.62
   2  -6  -5   56.95    0.71
   2  -5  -5  235.82    1.13
   0   4  -6  120.29    0.97
   1   1  -6    2.49    0.55
   2  -5  -4  227.47    1.01
  -1  -1  -9   65.06    1.04
   0   0  -8   58.12    0.97
   1 -12  -7    2.65    0.55
   2  -8  -4    9.02    0.41
   2  -7  -4    5.07    0.44
   2  -6  -4    0.60    0.45
   0 -13  -8   39.97    0.80
   1  -2  -7  134.91    1.28
  -1   2  -8    7.71    0.62
   0   2  -7   86.32    1.04
   1 -11  -7   47.52    0.84
   1   0  -6   -0.04    0.61
  -2   3  -8   14.82    0.81
   0  -1  -8   56.73    1.00
   1  -3  -7   12.49    0.87
   1 -10  -7   15.26    0.81
   1   1  -5   83.14    0.82
  -1   5  -6   25.00    0.80
   0 -12  -8   32.84    0.84
   0   4  -5  353.42    1.39
   0  -2  -8   16.75    0.75
   0   3  -6   41.37    0.75
   1  -9  -7   26.60    0.89
   1  -5  -7    0.69    1.04
   1  -1  -6    2.56    0.68
  -1 -10  -9    5.26    0.45
   1  -8  -7   47.92    1.08
   1  -6  -7   49.30    1.06
  -1  -9  -9    1.05    0.52
  -1  -5  -9   68.05    1.05
   0 -11  -8   75.76    1.05
  -3  -1  -9    0.40    0.51
  -1  -8  -9    5.75    0.53
   1 -12  -6   32.52    0.96
   1   0  -5    1.58    0.61
  -2  -2  -9    2.37    0.67
  -2   2  -8   11.22    0.81
  -1   3  -7   15.83    0.84
   0 -10  -8   65.07    1.05
  -1   0  -8    0.24    0.82
   0  -6  -8    0.22    0.85
   0   0  -7   -0.10    0.83
   0   2  -6   32.40    0.82
  -3  -2  -9    6.22    0.55
  -2  -3  -9    2.65    0.55
   0  -7  -8    5.11    0.75
   1 -10  -6   19.32    0.88
  -2  -5  -9    9.20    0.69
  -2   1  -8    0.38    0.71
  -1 -13  -8    5.59    0.66
   0  -1  -7  164.89    1.56
  -2  -8  -9   38.70    0.93
  -2  -6  -9   70.63    1.12
  -3  -4  -9    0.27    0.43
  -2  -7  -9   48.18    0.95
   1  -7  -6   24.68    1.06
  -1  -2  -8    7.99    1.01
  -3   1  -8   12.41    0.98
  -2   3  -7    6.99    0.80
  -1 -12  -8   86.09    1.28
   0 -12  -7    9.78    0.80
  -2   0  -8    7.94    0.88
   0   2  -5    1.77    0.74
   1  -3  -5  147.62    1.21
  -1  -3  -8    5.52    0.83
  -1   1  -7   13.57    0.99
   0  -3  -7    8.43    1.11
  -1   3  -6    7.61    0.80
  -1 -10  -8  101.73    1.43
   0  -4  -7   13.25    1.21
  -3   0  -8    0.20    0.84
  -2  -1  -8    0.82    0.93
  -1   4  -5   24.38    0.81
   0 -14  -6   18.61    1.03
   0 -10  -7   17.39    1.05
   1 -10  -5   16.44    0.91
  -1  -9  -8    0.77    0.74
  -1  -8  -8   43.36    1.20
   0  -5  -7    5.15    1.21
  -2   2  -7    3.60    0.91
  -2   4  -6  146.32    1.52
   0  -8  -7    3.21    1.12
   0  -7  -7  111.15    1.61
   1  -8  -5   22.27    0.86
   1  -7  -5   98.82    1.22
   1  -6  -5   28.17    0.81
  -2  -2  -8   12.33    1.36
   0  -1  -6  130.53    1.35
  -4  -1  -8    5.47    0.73
  -3  -1  -8   13.93    0.97
  -1   2  -6    4.45    0.77
   0  -2  -6   33.29    1.08
  -4  -2  -8   12.46    0.93
  -3   2  -7    0.85    1.05
  -2  -4  -8   27.28    1.22
  -2   1  -7    8.87    0.99
  -1 -13  -7   61.71    1.24
  -2 -10  -8    1.16    0.79
  -1  -2  -7   75.33    1.75
   0   0  -5    0.58    0.76
   1  -9  -4   26.81    0.88
  -1   3  -5  187.40    1.33
   0  -3  -6   49.91    1.19
   1  -8  -4   89.41    1.08
  -3  -3  -8   72.30    1.48
  -2 -15  -7    0.34    0.71
  -2  -9  -8  184.11    1.81
  -2  -8  -8   46.11    1.20
  -2  -7  -8  229.77    2.19
  -2  -6  -8   25.19    1.08
  -1 -12  -7    0.43    1.20
   0 -11  -6  194.71    1.88
   1  -7  -4    3.41    0.73
  -1  -3  -7   16.62    1.37
   0  -4  -6  109.96    1.46
  -3 -11  -8   35.90    0.96
   0 -10  -6   61.57    1.48
  -4  -4  -8    1.07    0.89
  -3   1  -7   60.15    1.51
  -1 -15  -6   13.86    1.16
   0  -5  -6   23.40    1.17
   0  -1  -5   63.35    1.08
  -3 -10  -8   45.07    1.07
   0  -9  -6  276.80    2.10
   0  -7  -6  552.01    2.79
   0  -6  -6   18.77    1.20
  -4  -5  -8   13.54    0.85
  -3  -9  -8   30.46    1.05
  -2 -14  -7    6.95    0.95
  -1  -5  -7  123.31    1.69
  -3  -8  -8   -0.20    0.67
  -3  -7  -8    0.36    0.69
  -3  -6  -8   15.25    0.94
  -1  -9  -7  343.37    2.50
  -1  -6  -7   20.19    1.23
   0 -13  -5   63.92    1.33
  -1  -8  -7  433.80    2.70
  -1  -7  -7   91.92    1.58
  -1   2  -5   62.73    1.10
  -1 -14  -6   39.06    1.15
   0  -2  -5    1.72    0.87
  -3   0  -7    1.39    0.86
  -4   0  -7   -1.14    1.16
  -1  -1  -6   11.92    1.09
   0 -12  -5  131.57    1.63
   0  -3  -5  153.72    1.39
  -3 -14  -7    4.45    0.61
  -2 -16  -6    4.15    0.78
  -3  -1  -7   60.57    1.34
  -1 -13  -6    2.24    0.92
   0 -11  -5  127.17    1.57
  -5  -2  -7   85.70    1.41
  -2 -11  -7  128.78    1.69
  -1  -2  -6    3.93    1.06
  -1   1  -5    3.53    0.80
   0  -4  -5  386.58    1.96
   0 -10  -5   81.57    1.32
  -2 -10  -7  407.42    2.75
  -2   3  -5    1.58    0.75
   0  -5  -5   14.30    0.94
  -3  -2  -7    0.34    1.08
  -2  -5  -7    0.95    1.11
  -1  -3  -6    3.31    1.10
   0  -9  -5  152.99    1.51
   0  -6  -5   32.10    0.98
   3  -8   2   41.65    0.91
   7  -5   2   62.68    1.33
   3  -4   3  417.82    2.18
   6  -7   2    9.27    1.06
   7  -9   0    2.57    0.73
   4  -5   3  310.71    2.23
   5 -10   1   62.40    1.29
   4 -10   1    5.59    0.83
   6  -9   1   50.85    1.25
   7  -4   2   17.93    0.84
   5  -4   3  131.10    1.81
   3  -3   3  109.47    1.23
   5 -11   0  321.37    2.27
   6   5   3  102.94    1.66
   4  -4   3  249.89    1.95
   6  -6   2   29.11    1.03
   6  -1   3    6.74    0.94
   6   4   3  263.30    2.15
   5  -7   2   24.30    1.11
   5  -3   3  741.41    3.50
   6   1   3    7.15    0.94
   6   2   3    5.18    0.87
   6   3   3   75.27    1.33
   7  -9  -1    5.93    0.70
   7  -8   0   -0.08    0.70
   7  -2   2    8.61    0.88
   4  -3   3   79.06    1.23
   6  -8   1   37.13    1.13
   7   6   2    7.65    0.71
   5  -9   1   10.80    0.88
   5  -2   3  343.63    2.41
   3  -6   2  193.31    1.40
   3  -1   3   62.56    0.92
   4  -9   1    8.06    0.86
   5   6   3   21.52    0.95
   4  -2   3   16.63    0.83
   5  -1   3   24.81    1.19
   7  -5   1   26.34    1.00
   7   0   2   -0.70    0.60
   5  -6   2  204.86    1.91
   7   3   2   38.93    1.14
   7   4   2   20.32    0.92
   5 -10   0  722.59    3.07
   7  -7   0    8.33    0.72
   7   2   2    8.80    0.78
   3  -8   1  127.90    1.19
   4  -1   3   95.30    1.21
   5   1   3   24.42    1.13
   6 -10  -1    2.82    0.78
   4 -10   0   79.19    1.12
   4   5   3  301.52    1.76
   5   2   3  332.35    2.17
   5   3   3  738.74    3.10
   3  -5   2   57.30    0.85
   4   1   3   95.21    1.11
   4   4   3  247.47    1.62
   5  -5   2  118.60    1.49
   4  -8   1    8.78    0.65
   4   2   3   16.59    0.66
   4   3   3   79.08    1.01
   8  -1   0    5.71    0.57
   6  -6   1   33.20    1.07
   7  -3   1    5.68    0.69
   6  -8   0   79.75    1.25
   8   0   0    0.18    0.49
   5  -4   2   11.27    0.92
   6   7   2    9.56    0.78
   7  -8  -2   14.20    0.68
   8   1   0    6.22    0.50
   7  -7  -1   83.60    1.28
   6   6   2   30.72    1.03
   7  -5   0   40.35    0.95
   7   7   1    0.49    0.57
   4  -4   2  277.98    1.63
   6  -5   1   -0.55    0.73
   6   0   2   52.90    1.17
   7  -1   1   -0.08    0.59
   4  -9   0    0.05    0.58
   5  -3   2   79.57    1.22
   6   5   2  214.12    1.71
   6  -7   0   35.37    0.99
   6   2   2   45.48    1.06
   6   4   2   93.42    1.29
   7   0   1    1.56    0.58
   5  -6   1  750.71    2.83
   5  -2   2    9.79    0.84
   6  -4   1    0.24    0.68
   7  -7  -2   34.47    0.86
   7   1   1   -0.01    0.53
   7   5   1   28.61    0.88
   8  -1  -1   -0.03    0.40
   7   3   1    5.66    0.65
   7   4   1   15.98    0.73
   6  -8  -1   21.43    0.74
   8   0  -1    0.22    0.43
   7  -3   0    9.42    0.63
   5   7   2   24.63    0.81
   6  -3   1    2.85    0.68
   8   1  -1    0.38    0.39
   4  -2   2    0.43    0.56
   5  -9  -1  887.93    2.82
   5  -5   1  642.70    2.53
   5   0   2   -0.45    0.67
   7  -7  -3   -0.36    0.44
   7  -2   0   40.23    0.95
   5   6   2  211.80    1.43
   4  -1   2   67.34    0.83
   5  -7   0    5.92    0.65
   5   2   2   10.45    0.82
   5   5   2  122.74    1.17
   5   3   2   79.95    1.00
   5   4   2   11.38    0.60
   6  -5   0    0.61    0.73
   7  -4  -1    4.68    0.58
   7   8   0   -0.15    0.40
   5  -4   1   20.35    0.77
   6  -8  -2    0.69    0.58
   6  -1   1    0.46    0.63
   6   8   1   35.49    0.84
   4  -9  -1  305.55    1.43
   4  -5   1  444.09    1.73
   4   0   2   20.99    0.58
   7   0   0    1.04    0.60
   7   7   0    8.28    0.58
   5  -8  -1  643.13    2.29
   6   0   1    0.16    0.69
   7  -5  -2    4.45    0.50
   4  -7   0  594.94    1.90
   4   6   2    3.03    0.41
   5  -9  -2  152.89    1.24
   6  -4   0   57.85    0.99
   7  -3  -1    0.51    0.46
   7   2   0   37.83    0.84
   4   2   2    0.52    0.41
   4   5   2    0.21    0.47
   5  -6   0  303.52    1.63
   6   1   1    0.68    0.71
   6   6   1   31.85    0.75
   4  -4   1   79.31    0.82
   4   3   2   36.74    0.61
   4   4   2  277.50    1.28
   6  -8  -3    6.17    0.61
   6   5   1    0.11    0.61
   6   3   1    2.85    0.62
   6   4   1    0.63    0.57
   7  -2  -1    2.35    0.48
   5  -2   1   52.08    0.84
   6  -7  -2    0.36    0.46
   6  -3   0  191.76    1.46
   7  -4  -2    5.86    0.50
   7   9  -1    6.03    0.44
   4  -8  -1  306.33    1.31
   7  -5  -4   18.40    0.52
   4  -6   0   56.42    0.66
   4  -3   1    0.31    0.43
   6  -2   0   33.67    0.77
   7  -3  -2   65.23    0.87
   5  -8  -2  152.16    1.12
   7   0  -1   16.36    0.60
   7   8  -1    1.39    0.42
   7  -4  -3   13.21    0.55
   5   0   1    0.78    0.51
   6  -1   0    0.29    0.52
   7   1  -1   32.00    0.70
   4  -2   1  471.87    1.52
   6   9   0    0.66    0.53
   7  -2  -2    4.50    0.43
   5   1   1   12.81    0.56
   7  -4  -4    0.60    0.36
   7   3  -1    0.69    0.46
   5  -6  -1    1.73    0.48
   5   7   1  287.33    1.37
   7   5  -1    0.28    0.42
   7  -1  -2   10.77    0.54
   4  -7  -1  319.76    1.24
   5   3   1    1.40    0.48
   5   5   1  659.51    1.97
   5   6   1  782.79    2.13
   4  -1   1  105.88    0.78
   5   4   1   20.65    0.57
   6  -6  -3   13.19    0.53
   6  -3  -1    1.92    0.53
   6   2   0   35.51    0.75
   6   7   0   34.42    0.63
   7   0  -2    0.29    0.37
   6   6   0   15.10    0.53
   4  -8  -2 1299.50    2.37
   6   4   0   61.00    0.82
   7   1  -2   10.68    0.48
   5  -5  -1   78.66    0.80
   5  -2   0    1.58    0.56
   7  -2  -4    7.46    0.39
   7  -1  -3   11.42    0.44
   7   2  -2    4.82    0.40
   4   1   1  105.35    0.72
   7   3  -2   65.11    0.83
   6  -5  -3    1.07    0.39
   6  -1  -1   11.02    0.52
   7   4  -2    5.88    0.39
   7   6  -2   14.21    0.43
   6  10  -1    2.58    0.47
   7   0  -3   -0.07    0.32
   4   7   1   12.60    0.39
   5  -7  -3  361.97    1.43
   5  -6  -2  221.08    1.15
   6  -3  -2    6.51    0.52
   6   0  -1   -0.34    0.43
   7   1  -3   11.76    0.44
   4  -3   0    3.12    0.35
   4   4   1   79.53    0.62
   4   5   1  448.85    1.29
   4   6   1   80.80    0.61
   6  -5  -4   20.41    0.52
   5   0   0    0.15    0.41
   6  -5  -5    0.29    0.33
   6   9  -1   12.17    0.44
   7   0  -4   -0.03    0.28
   4  -7  -2    3.15    0.31
   7   7  -3    0.38    0.31
   6  -2  -2    1.72    0.47
   7   3  -3    1.84    0.29
   5  -5  -2   54.69    0.66
   5  -3  -1    3.26    0.41
   7   1  -4    2.65    0.29
   7   4  -3   12.55    0.39
   7   5  -3   10.61    0.39
   4  -5  -1    0.60    0.27
   4  -2   0   53.56    0.53
   5   8   0   78.75    0.71
   6   3  -1    1.50    0.44
   6   7  -1   -0.01    0.36
   5  -6  -3   23.60    0.52
   5   2   0    1.92    0.38
   6  -4  -4   23.38    0.54
   6   4  -1    1.19    0.46
   6   6  -1    6.66    0.45
   7   2  -4   10.13    0.35
   5   3   0   24.43    0.51
   5   7   0    5.47    0.46
   6  -1  -2    1.09    0.40
   6  11  -2    0.90    0.36
   7   3  -4    2.01    0.29
   5   6   0  301.01    1.22
   6  -4  -5    3.97    0.37
   7   2  -5    5.23    0.27
   7   4  -4    0.67    0.27
   7   6  -4    0.38    0.25
   5  -2  -1    5.92    0.41
   5   5   0    1.64    0.37
   4  -1   0   66.84    0.54
   6   0  -2  521.90    1.79
   4  -6  -2   27.99    0.42
   5  -4  -2   32.57    0.53
   6  10  -2    0.86    0.35
   5  -6  -4   19.94    0.47
   6  -3  -6    1.69    0.27
   6  -3  -4   59.02    0.68
   4  -7  -3   15.59    0.37
   5  -1  -1   30.71    0.51
   4   0   0   15.05    0.35
   5  -5  -3    2.05    0.34
   6  -3  -5   32.85    0.53
   6  -1  -3   19.13    0.48
   6   2  -2    2.13    0.34
   5   0  -1   19.24    0.52
   6  -2  -4  110.36    0.91
   6   8  -2    1.01    0.34
   6   3  -2    5.94    0.38
   6   7  -2    0.17    0.43
   6  11  -3   26.23    0.46
   4  -3  -1   30.88    0.40
   4   1   0   67.00    0.52
   6  -2  -6    5.43    0.32
   6   0  -3   -0.17    0.36
   6   4  -2   12.23    0.43
   4  -5  -2   98.47    0.61
   5  10  -1    1.31    0.33
   6  -2  -5   11.29    0.38
   4   9   0    0.24    0.33
   5  -5  -4   86.19    0.69
   5  -4  -3    2.91    0.38
   5   1  -1   29.37    0.49
   6  12  -4    1.19    0.23
   4   2   0   52.97    0.46
   5  -2  -2   47.82    0.56
   6   1  -3   16.83    0.43
   6  10  -3    0.17    0.31
   5   2  -1    6.09    0.37
   5   9  -1  887.87    1.92
   6  -1  -6   35.99    0.50
   4  -6  -3  150.79    0.74
   4   8   0   25.80    0.36
   5  -5  -5    5.81    0.37
   6  -1  -5   -0.03    0.28
   6   9  -3    0.75    0.35
   4  -2  -1  107.50    0.61
   5   3  -1    3.70    0.36
   6   0  -4    6.84    0.34
   6   2  -3    3.94    0.35
   4   6   0   54.16    0.47
   5   4  -1   49.49    0.55
   5   7  -1    1.95    0.32
   6   3  -3   21.72    0.46
   6   8  -3    6.40    0.46
   5  -3  -3    3.35    0.35
   5  -1  -2   12.89    0.41
   5   6  -1    1.29    0.34
   6   0  -6    0.51    0.30
   6   4  -3    6.96    0.41
   4  -4  -2    4.55    0.26
   5  -4  -4   38.27    0.51
   6   1  -4   25.75    0.48
   6   5  -3    0.76    0.30
   6   6  -3   12.84    0.41
   4  -1  -1   31.93    0.39
   5  -4  -6  118.91    0.79
   6   2  -4  101.05    0.80
   4  -6  -4  885.78    1.70
   5  -4  -5   56.19    0.54
   5   0  -2   -0.19    0.34
   5  11  -2    0.41    0.35
   6   1  -5    0.20    0.24
   6   3  -4   56.25    0.63
   6  10  -5    1.93    0.19
   6   2  -6    5.44    0.28
   6   2  -5   11.09    0.34
   6   4  -4   22.25    0.50
   5  -3  -4   17.45    0.41
   5   1  -2   13.53    0.41
   6   5  -4   20.82    0.44
   6   6  -4    1.86    0.27
   6   7  -4   20.32    0.40
   6   9  -5    1.13    0.23
   5  10  -2   80.77    0.65
   6   3  -6    1.80    0.22
   6   3  -5   34.66    0.49
   5  -3  -6   47.96    0.53
   5   2  -2   46.73    0.55
   6   4  -6   45.53    0.52
   6   4  -5    3.39    0.26
   6   7  -6   39.79    0.52
   5  -3  -5   37.51    0.48
   5  -1  -3   23.59    0.45
   5   9  -2  156.25    0.86
   6   5  -6   -0.21    0.19
   6   5  -5    0.57    0.21
   6   7  -5    7.97    0.29
   5  -2  -7   21.56    0.39
   5   3  -2    7.59    0.38
   4   1  -1   32.50    0.38
   5  -2  -4  163.50    0.89
   5   8  -2  147.09    0.86
   5  12  -3   55.90    0.60
   4  -5  -4  668.01    1.48
   4  -4  -3    1.09    0.25
   5   4  -2   32.46    0.48
   5   7  -2  114.19    0.78
   4  -2  -2   11.09    0.28
   4  10  -1   96.43    0.59
   5   0  -3   14.12    0.41
   5   5  -2   55.41    0.57
   4   2  -1  109.69    0.59
   5  -2  -6    3.08    0.28
   5  -2  -5    2.90    0.31
   5  -1  -7    0.39    0.28
   5  11  -3  277.04    1.11
   4  -5  -5  151.25    0.77
   4   3  -1   30.86    0.38
   4   9  -1  293.80    0.96
   5   1  -3   23.48    0.46
   4  -1  -2    1.95    0.25
   4   8  -1  304.83    0.96
   5   2  -3   38.30    0.58
   5  10  -3   99.70    0.71
   5  13  -5   16.75    0.35
   4  -3  -3    5.86    0.26
   4   6  -1   92.09    0.56
   4   7  -1  316.15    0.96
   5  -1  -6   26.33    0.44
   5  -1  -5    6.28    0.36
   5   0  -7    0.98    0.27
   5   0  -4   -0.20    0.35
   5  12  -4    8.53    0.34
   4  -4  -4  144.26    0.71
   5   3  -3    3.31    0.44
   5   9  -3    4.46    0.38
   5   8  -3    0.03    0.32
  -6 -14   0    1.45    0.23
  -4  -6  -2    3.02    0.31
  -6 -13   0    4.22    0.27
  -6  -5   1   12.88    0.41
  -6 -10   0    2.15    0.38
  -5  -6  -1  758.82    1.97
  -5  -1   1   31.26    0.42
  -4 -15  -2    2.97    0.33
  -6 -11   0   16.88    0.43
  -4 -19  -1    0.19    0.24
  -4  -7  -2    6.66    0.35
  -5 -15  -1    1.46    0.24
  -5  -3   0   24.55    0.42
  -4 -14  -2  489.47    1.66
  -5  -7  -1  285.49    1.26
  -4  -8  -2   59.67    0.61
  -4  -3  -1    0.39    0.27
  -3 -17  -2    0.22    0.32
  -5 -14  -1   28.68    0.51
  -4 -13  -2   46.43    0.60
  -5 -18   0   -0.28    0.19
  -4 -10  -2    5.42    0.37
  -3  -5  -2   58.12    0.47
  -6  -5   2    4.30    0.40
  -5 -13  -1  143.75    0.98
  -5  -4   0   21.48    0.48
  -4  -1   0   67.97    0.52
  -5 -11  -1   44.05    0.58
  -5  -2   1    5.39    0.32
  -6 -12   1    6.70    0.36
  -4  -4  -1   77.21    0.58
  -3  -6  -2  197.60    0.81
  -6  -6   2    0.17    0.24
  -3 -15  -2   33.77    0.53
  -6 -15   2    5.89    0.30
  -5 -16   0    1.65    0.25
  -3  -7  -2  223.02    0.88
  -6  -7   2    0.04    0.28
  -5  -3   1    3.45    0.32
  -4  -5  -1  438.53    1.28
  -3 -14  -2   12.64    0.39
  -6  -6   3   13.14    0.43
  -5  -6   0  299.07    1.23
  -4 -16  -1    0.36    0.37
  -4  -2   0   52.89    0.44
  -6 -13   2   10.29    0.36
  -6  -8   2    1.00    0.30
  -3 -13  -2  205.88    0.98
  -6  -9   2    6.68    0.41
  -5  -7   0    5.88    0.44
  -5  -2   2   47.69    0.52
  -4 -19   0   38.41    0.56
  -3 -12  -2  139.11    0.82
  -6 -11   2    0.65    0.28
  -6 -10   2    0.79    0.28
  -6  -7   3    7.87    0.34
  -5 -14   0    6.95    0.36
  -4 -15  -1    1.73    0.40
  -4  -6  -1   75.32    0.59
  -3 -11  -2   81.62    0.62
  -5  -8   0   80.11    0.75
  -5  -4   1   51.90    0.56
  -3 -18  -1   11.88    0.43
  -5 -13   0   14.23    0.42
  -5 -12   0   13.84    0.40
  -5 -10   0  672.50    1.97
  -5  -9   0    2.87    0.40
  -6 -12   3   12.82    0.41
  -6  -9   3    1.35    0.28
  -6  -8   4   27.04    0.49
  -4 -18   0   11.19    0.37
  -2 -14  -2    9.54    0.29
  -6 -11   3   26.66    0.45
  -6  -9   4   10.34    0.33
  -6 -11   4   15.02    0.39
  -6 -10   4   -0.23    0.25
  -5 -18   2   22.81    0.42
  -5  -5   1   78.17    0.65
  -5  -3   2    7.54    0.32
  -4 -12  -1   13.11    0.43
  -4 -11  -1    5.99    0.37
  -4  -9  -1    7.82    0.36
  -3 -20   0   17.92    0.41
  -3 -17  -1    6.85    0.33
  -2 -13  -2  191.54    0.86
  -4 -17   0   42.41    0.62
  -2 -12  -2   24.66    0.35
  -4  -4   0    7.31    0.30
  -2 -11  -2   29.18    0.36
  -2 -10  -2  165.81    0.71
  -3 -16  -1  112.19    0.79
  -5 -14   1    9.21    0.38
  -5 -13   1    5.24    0.34
  -5  -8   1  653.50    1.83
  -4  -5   0   22.31    0.36
  -4  -2   1  112.45    0.59
  -3 -19   0   60.15    0.63
  -5 -12   1   32.06    0.52
  -5  -9   1  891.97    2.18
  -5 -11   1  209.19    1.13
  -5 -10   1    1.40    0.36
  -5  -5   2   57.72    0.60
  -5 -17   3   40.92    0.53
  -4 -18   1    9.95    0.33
  -5 -15   2    1.06    0.22
  -4  -6   0   57.67    0.51
  -5  -4   3    2.56    0.33
  -3 -18   0   24.03    0.46
  -3 -13  -1    6.67    0.37
  -3  -7  -1   78.63    0.52
  -5 -16   3   30.09    0.47
  -5  -6   2  225.71    1.05
  -4  -7   0  613.56    1.53
  -4  -3   1   31.86    0.40
  -4 -13   0  208.64    1.10
  -3 -20   1   32.76    0.50
  -3 -12  -1   40.25    0.48
  -3  -8  -1  125.74    0.66
  -5 -13   2    3.93    0.31
  -5  -7   2  116.72    0.80
  -4 -12   0  304.38    1.27
  -4  -8   0   27.05    0.42
  -3  -9  -1    4.98    0.25
  -2 -16  -1    7.82    0.30
  -5 -16   4    3.39    0.23
  -5  -5   3    2.20    0.34
  -4 -11   0  605.72    1.72
  -4 -10   0   82.83    0.69
  -4  -9   0    0.23    0.29
  -5 -15   3   21.23    0.40
  -5 -12   2  167.59    1.02
  -5 -11   2   -0.08    0.39
  -3 -17   0   35.53    0.50
  -4 -16   1    0.83    0.25
  -3 -21   2    0.39    0.22
  -5 -15   4   10.70    0.35
  -5 -14   3   27.36    0.47
  -5  -6   3   23.88    0.45
  -4 -18   2    6.21    0.31
  -5 -13   3  130.95    0.92
  -4 -19   3   11.45    0.33
  -4  -2   2   11.08    0.25
  -3 -19   1    3.58    0.29
  -3 -16   0  131.00    0.86
  -5 -14   5  161.86    1.02
  -5  -7   3  355.00    1.35
  -2 -14  -1   16.22    0.38
  -5 -13   5   16.45    0.39
  -5 -10   3  104.44    0.84
  -5  -9   3    4.97    0.34
  -4 -17   2    3.78    0.27
  -2 -18   0   52.16    0.56
  -3 -20   2   49.10    0.57
  -3 -15   0   45.86    0.56
  -2 -13  -1    3.71    0.27
  -5 -12   4    8.58    0.35
  -5 -12   5   13.99    0.39
  -5  -7   4   10.45    0.35
  -4 -18   3    4.05    0.24
  -4 -13   1    0.18    0.29
  -4  -6   1   90.63    0.60
  -3 -18   1   27.40    0.46
  -5 -11   4    0.05    0.34
  -5  -8   4    0.31    0.26
  -4  -3   2    4.44    0.22
  -2 -20   1   45.22    0.55
  -2 -12  -1   74.45    0.54
  -5 -11   5   10.95    0.35
  -5 -10   4   15.06    0.40
  -5 -10   5    1.17    0.28
  -5  -9   4   18.76    0.40
  -5  -9   5   31.39    0.47
  -4 -16   2    2.26    0.29
  -4 -12   1   68.45    0.68
  -4  -7   1  312.50    1.10
  -4 -18   4    7.05    0.28
  -4 -11   1   41.97    0.55
  -4  -8   1  297.46    1.11
  -2 -11  -1  262.74    0.89
  -4 -17   3    1.05    0.24
  -4 -10   1  102.52    0.74
  -4  -9   1  306.15    1.16
  -2 -17   0    5.22    0.33
  -2 -10  -1  630.37    1.30
  -4 -15   2    1.63    0.28
  -3 -19   2  110.77    0.82
  -3 -17   1   12.96    0.39
  -2 -21   2    0.95    0.22
  -4  -4   2    4.39    0.24
  -3 -12   0   25.96    0.42
  -3  -7   0   30.83    0.37
  -4 -17   4    0.77    0.23
  -4 -14   2    3.33    0.29
  -3 -11   0  226.62    0.95
  -2 -19   1   16.65    0.38
  -4 -17   5    8.88    0.29
  -3 -16   1   40.90    0.58
  -3  -9   0   37.93    0.42
  -3  -8   0   56.78    0.47
  -2 -16   0   28.80    0.43
  -4  -5   2   97.88    0.60
  -4 -13   2   12.92    0.39
  -4  -3   3    5.98    0.28
  -3 -18   2   19.02    0.42
  -4 -16   4   10.45    0.33
  -4 -15   3    0.36    0.26
  -4  -6   2   28.26    0.38
  -4 -16   5    0.61    0.21
  -4 -12   2    0.83    0.36
  -2 -20   2    8.36    0.33
  -2 -15   0   85.88    0.65
  -4 -11   2  161.95    0.94
  -2 -21   3   10.65    0.32
  -2 -18   1   47.07    0.55
  -4 -15   6    1.15    0.17
  -4 -14   3    0.15    0.26
  -4 -10   2   17.00    0.42
  -4  -9   2 1306.43    2.40
  -4  -8   2 1328.25    2.34
  -4 -15   4   12.61    0.35
  -4  -4   3    1.01    0.22
  -4 -15   5   98.14    0.82
  -3 -14   1   43.60    0.54
  -4 -13   3    9.21    0.34
  -4 -14   4   42.27    0.60
  -2 -21   4   28.00    0.43
  -4 -12   3   44.90    0.57
  -4 -11   7    0.98    0.21
  -3 -16   2   26.43    0.48
  -3 -13   1   71.29    0.63
  -2 -19   2    1.84    0.29
  -2 -17   1    9.05    0.32
  -4 -13   6   29.99    0.48
  -4 -10   7    0.42    0.21
  -2 -20   3   21.88    0.44
  -2 -13   0    0.78    0.21
  -1 -16   0   21.43    0.37
  -4 -13   4  123.10    0.90
  -4 -11   3  572.77    1.75
  -4  -6   3  155.61    0.80
  -4  -4   4  146.42    0.76
  -3 -12   1    0.23    0.28
  -4 -10   3  465.08    1.54
  -4  -7   3   15.98    0.37
  -3 -18   4    9.21    0.31
  -3 -17   3    7.18    0.35
  -4 -12   6   24.43    0.46
  -4  -8   3   53.93    0.57
  -3 -18   5    0.21    0.17
  -3 -11   1    0.85    0.25
  -2 -12   0   27.55    0.36
  -4 -12   4    9.90    0.39
  -4  -5   4  667.51    1.63
  -3 -10   1    0.60    0.23
  -2 -16   1    6.28    0.36
  -1 -20   2    6.05    0.33
  -4 -12   5   30.89    0.51
  -4 -11   6   51.79    0.59
  -3  -9   1  136.04    0.71
  -3  -8   1    6.05    0.27
  -3  -7   1   34.09    0.38
  -2 -11   0   51.01    0.44
  -1 -21   3   41.44    0.50
  -4  -6   4  884.01    1.94
  -4  -5   5  157.25    0.85
  -3 -17   6    1.56    0.21
  -1 -18   1  134.24    0.81
  -1 -15   0   16.87    0.32
  -4 -10   4  169.66    0.99
  -4  -9   6   10.72    0.34
  -4  -8   6   15.94    0.44
  -4  -7   4  193.11    0.96
  -4  -7   6   55.95    0.59
  -3 -17   4    0.31    0.23
  -3 -14   2   10.08    0.40
  -2 -19   3    0.01    0.30
  -4  -9   4   48.16    0.58
  -4  -6   5  122.41    0.80
  -4  -9   5   14.75    0.41
  -2 -15   1    2.51    0.28
  -4  -8   5   43.53    0.52
  -1 -21   4   54.62    0.59
  -2 -17   2  220.70    1.12
  -3 -16   4    8.36    0.35
  -3 -16   6    0.79    0.18
  -1 -19   2    1.11    0.31
  -3 -16   5    1.63    0.26
  -3 -12   2   16.11    0.41
  -1 -20   3    3.24    0.29
  -1 -17   1    2.09    0.28
  -2 -19   5    9.07    0.30
  -2 -18   3   37.98    0.56
  -2 -14   1    2.92    0.29
  -3 -14   7   16.05    0.38
  -3 -11   2  165.29    0.91
  -3 -15   4   10.25    0.38
  -3 -15   6   86.77    0.80
  -3 -10   2   75.57    0.61
  -2 -16   2    8.79    0.36
  -3 -15   5   41.83    0.56
  -3 -10   8   -0.21    0.18
  -3 -13   3    0.35    0.35
  -3  -9   2   19.34    0.36
  -3  -8   2   24.40    0.41
  -3  -6   2   48.09    0.43
  -2 -18   4    7.06    0.29
  -2 -18   6    2.89    0.23
  -1 -20   4   10.38    0.35
  -1 -18   2   15.04    0.38
  -1 -16   1    8.42    0.32
  -3 -14   4  111.59    0.87
  -3 -14   6   25.11    0.48
  -2 -18   5    3.74    0.25
  -1 -20   5    0.55    0.17
  -1 -19   3    3.60    0.32
  -3 -14   5    8.43    0.36
  -3 -12   3   65.22    0.67
   0 -20   3    1.69    0.29
  -3 -13   4   23.08    0.48
  -3 -11   3  102.69    0.78
  -2 -11   1    0.69    0.24
  -3 -11   7    5.43    0.33
  -2 -17   4   -0.27    0.25
  -2 -17   6   39.56    0.53
  -2 -16   3   33.46    0.60
  -2 -16   7   54.16    0.63
  -2 -14   2   19.97    0.47
  -3 -12   4   56.29    0.67
  -3 -10   3   62.58    0.61
  -3 -10   7    6.03    0.36
  -2 -17   5    3.19    0.28
  -2 -10   1   69.52    0.52
  -1 -19   4    8.34    0.34
  -1 -19   6   27.52    0.44
  -3  -9   3   63.93    0.59
  -3 -12   5  221.29    1.22
  -3  -9   7   42.97    0.58
  -3  -5   3   11.55    0.29
  -1 -19   5    0.67    0.21
  -1 -18   3    1.33    0.28
  -3 -11   4   85.09    0.77
  -3  -8   3  123.78    0.75
  -2 -16   4    4.22    0.36
  -2 -16   6   24.82    0.45
  -2 -15   7    2.64    0.26
  -2 -13   2  243.99    1.09
   0 -18   2   -0.01    0.32
  -3  -3   4    0.30    0.21
  -2 -16   5    4.79    0.34
   0 -20   5   12.31    0.34
  -3 -10   6    2.97    0.33
   0 -19   3    0.38    0.28
  -1 -18   6   40.22    0.56
  -3  -9   6    8.53    0.36
  -3  -4   4    0.06    0.22
  -2 -14   3    2.73    0.36
  -2 -12   2   27.28    0.44
  -3  -9   5  137.73    0.94
  -3  -8   4  103.48    0.75
  -3  -8   6    0.82    0.30
  -3  -5   4   18.78    0.37
  -2 -15   4  200.97    1.18
  -2 -15   6   44.69    0.60
  -2 -14   7   47.75    0.62
  -1 -17   3    0.78    0.30
  -1 -17   7    0.48    0.21
  -1 -13   1    3.51    0.28
  -3  -7   6   52.24    0.63
  -3  -6   4  140.55    0.78
  -3  -6   6    5.99    0.36
  -3  -5   6  192.04    1.01
  -2 -15   5   35.37    0.63
  -3  -8   5   37.38    0.53
  -2 -11   2  427.77    1.36
  -3  -7   5    6.33    0.31
  -3  -6   5  127.79    0.83
  -3  -5   5  390.06    1.34
  -1 -15   2    6.43    0.38
   0 -19   4    0.27    0.27
   0 -19   6   17.78    0.39
  -2 -13   3    8.85    0.40
  -2 -11   8    0.22    0.25
   0 -19   5   10.18    0.37
  -2 -14   4   -0.25    0.32
  -2 -14   6    2.14    0.30
  -1 -17   6    0.59    0.21
  -2 -14   5   80.59    0.82
  -2 -10   2  144.37    0.79
  -1 -16   3    7.92    0.39
  -1 -12   1   46.63    0.46
  -2 -12  -1   73.47    0.70
  -2 -11  -1  258.24    1.16
  -1 -23   2    0.36    0.23
  -2 -19   1   16.90    0.59
  -2 -17   0    5.35    0.46
  -2 -16   5    5.31    0.45
  -2 -19   2    1.62    0.48
  -2 -18   4    7.23    0.42
  -2 -15   5   38.64    0.75
  -2  -8   5   29.57    0.54
  -1 -22   1   48.49    0.78
  -1 -21   0    0.11    0.35
  -1 -19  -1  162.05    1.25
  -1 -18   6   40.73    0.71
  -2 -18   1   47.84    0.82
  -2 -16   0   28.21    0.62
  -2 -17   4    0.03    0.47
  -1 -22   3  100.39    1.07
  -1 -14  -2   67.22    0.71
  -2 -17   1    9.58    0.57
  -2 -13   5   65.11    0.82
  -2 -12   5   24.23    0.65
  -2 -11   5    1.99    0.43
  -2 -10   5    1.79    0.39
  -1 -21   4   55.52    0.80
  -1 -20   0   79.97    0.96
  -1 -18  -1   16.98    0.58
  -1 -13  -2   86.59    0.76
  -1 -21   1   38.73    0.71
  -2 -16   1    6.23    0.53
  -2  -7   4    4.89    0.31
  -1 -19   5    0.43    0.30
  -2 -12   0   27.02    0.52
  -2 -11   0   52.10    0.62
  -2 -10   0   70.06    0.65
  -1 -21   3   37.30    0.73
  -2  -8   4    8.67    0.37
  -1 -20   4   10.03    0.43
  -1 -17  -1  750.42    2.43
   0 -22   0   13.34    0.48
  -1 -19   0    9.59    0.49
  -2 -15   3   36.52    0.76
  -2 -14   1    3.26    0.45
  -2  -9   4  107.75    0.86
  -2 -15   2    8.43    0.55
  -2 -10   4    0.00    0.30
   0 -20  -1  259.83    1.54
  -2 -14   3    3.50    0.49
  -1 -20   2    5.99    0.43
  -1 -16  -1  135.86    1.04
   0 -22   4   25.61    0.58
  -2 -14   2   20.12    0.61
  -2 -12   1  159.29    1.05
  -2  -9   1  335.69    1.29
  -2  -8   3    0.47    0.32
  -1 -19   4    8.51    0.44
  -2 -13   3    8.59    0.50
  -2 -11   1    0.71    0.35
  -2 -10   1   71.73    0.70
  -1 -18   0  163.31    1.25
  -1 -12   6   34.40    0.70
   0 -22   1    1.73    0.40
  -2 -13   2  247.87    1.41
  -2 -12   3   54.64    0.73
  -2  -9   3   28.44    0.51
  -1 -15  -1   40.55    0.63
   0 -18   6    0.47    0.38
  -2 -12   2   27.68    0.57
  -2 -11   3    0.02    0.36
  -2  -9   2   16.64    0.43
   0 -22   3  103.51    1.06
  -2 -11   2  423.78    1.64
  -2 -10   2  142.20    0.95
  -1 -19   2    1.16    0.48
  -1 -18   4    0.78    0.37
  -1 -16   5   16.77    0.65
   0 -22   2   58.39    0.83
   0 -19  -1  605.99    2.25
  -1 -17   0    3.76    0.45
  -1 -14  -1  234.96    1.23
   0 -21   4    0.00    0.27
   0 -17   6   13.32    0.51
   1 -23   1    1.06    0.32
  -1 -15   5    0.08    0.41
   0 -21   1    1.65    0.38
  -1 -18   2   15.85    0.55
  -1 -16   0   22.84    0.63
   0 -21   3   36.60    0.71
   0 -20   0  155.67    1.26
   0 -19   5    9.16    0.45
   1 -23   2   17.23    0.48
   1 -22   0    2.33    0.33
   0 -21   2    1.80    0.40
  -1 -17   1    1.94    0.50
  -1 -14   5   75.04    0.90
   0 -20   4   36.87    0.70
   0 -18  -1  118.20    1.02
  -1 -17   3    0.60    0.39
  -1 -15   0   17.68    0.51
  -1 -13   5   29.89    0.63
  -1 -17   2   24.32    0.64
   0 -18   5    0.04    0.44
  -1 -12   5   24.12    0.60
   0 -19   0    0.09    0.38
  -1 -11   5    4.03    0.44
   0 -20   3    1.94    0.37
   0 -17  -1  450.90    1.85
   0 -15   6    5.38    0.45
  -1 -16   3    8.50    0.56
  -1 -10   5   17.85    0.57
  -1  -9   5    0.25    0.40
  -1  -8   5   25.47    0.50
   1 -18   6   -0.27    0.32
   1 -21   4   38.59    0.75
  -1 -15   1   50.34    0.74
  -1 -13   0   19.14    0.50
   0 -17   5    7.80    0.62
   0 -14   6   19.24    0.60
   2 -22   0   10.91    0.42
  -1 -15   3   12.88    0.59
  -1 -15   2    6.35    0.61
   0 -18   0  306.73    1.65
  -1 -13   4  154.39    1.18
   0 -16  -1  707.60    2.20
   0 -13   6   51.62    0.81
  -1 -14   1   60.30    0.73
   0 -19   2   38.81    0.73
   1 -21   1   10.76    0.50
   1 -21   3  159.91    1.28
   1 -17   6    2.46    0.39
  -1 -14   3   54.42    0.81
  -1 -12   4   64.45    0.79
   0 -16   5    3.86    0.48
   1 -20   0   86.86    0.96
  -1 -14   2    2.01    0.44
   0 -12   6   23.75    0.63
   1 -21   2   78.53    0.98
  -1 -13   1    3.33    0.38
  -1 -11   4   77.09    0.79
   2 -22   3  127.06    1.12
  -1 -13   3   72.50    0.83
  -1 -10   4   12.60    0.44
   0 -18   3   95.53    1.06
   0 -17   4   27.57    0.71
   0 -15  -1   74.59    0.75
   0 -11   6  211.28    1.33
  -1 -13   2   24.68    0.55
  -1  -9   4   23.82    0.51
  -1  -8   4   88.06    0.74
   0 -15   5  135.51    1.23
   1 -16   6   29.95    0.70
   2 -21   4    2.85    0.33
   1 -20   3   54.09    0.81
  -1 -12   2    0.80    0.35
  -1 -11   1  426.80    1.49
  -1 -11   3   86.80    0.79
   0 -17   1  435.40    1.97
   0 -16   0  289.62    1.50
   0 -14   5    1.25    0.41
   1 -20   2   54.45    0.82
   1 -19   0   10.78    0.47
   1 -19   4   26.95    0.63
   1 -15   6   14.12    0.53
  -1 -11   2  469.21    1.64
   2 -21   1    8.93    0.46
   2 -21   3    0.16    0.27
  -1 -10   2  295.83    1.24
   0 -13  -1   32.68    0.52
   0 -13   5   61.66    0.82
   2 -20   4   11.81    0.44
   3 -21   0    0.71    0.27
   0 -16   1  697.21    2.40
   0 -16   3  115.50    1.15
   0 -15   4    4.55    0.53
   1 -19   3    5.20    0.47
   1 -14   6   39.89    0.70
   1 -19   2    0.07    0.44
   1 -18   4    0.37    0.41
   0 -16   2  418.95    1.94
   0 -12   5  127.52    1.05
   1 -18   0  165.38    1.22
   3 -21   3   -0.11    0.25
   0 -15   3    2.39    0.49
   0 -14   0  298.28    1.37
   0 -11   5  117.85    1.01
   2 -20   1    3.36    0.44
   0 -15   1   73.50    0.83
   1 -16  -1    9.50    0.50
   2 -20   2   25.46    0.65
   2 -19   4    7.32    0.39
   3 -21   2   44.97    0.72
   3 -20   4    0.77    0.29
   0 -15   2  123.34    1.08
   1 -17   4    1.22    0.41
   0 -10   5   75.59    0.80
   1 -18   2  190.77    1.43
   2 -19   0   46.73    0.76
   1 -17   0    3.44    0.44
   1 -15   5    0.08    0.45
   2 -15   6    2.59    0.43
   3 -20   0   19.23    0.53
   0 -14   3  388.67    1.79
   0  -8   5   35.14    0.53
   0 -12   4  213.33    1.30
   1 -17   3   16.79    0.56
   3 -20   3   34.39    0.68
   1 -15  -1   52.05    0.67
   2 -18   4   13.93    0.52
   0 -13   3  638.48    2.17
   1 -17   2   41.21    0.79
   2 -19   2    4.26    0.43
   0 -12   0   21.62    0.43
   1 -16   0   22.95    0.61
   1 -10   6   84.65    0.89
   2 -17  -1    9.18    0.52
   0 -13   1   33.70    0.56
   0 -11   4    6.34    0.40
   2 -18   0   53.55    0.81
   0 -13   2   14.64    0.47
   4 -20   1    1.40    0.32
   1 -15   4  117.35    1.16
   1 -13   5   67.40    0.91
   3 -19   0   63.56    0.84
   3 -15   6    1.74    0.41
   4 -20   2    4.81    0.30
   0 -12   3   29.40    0.58
   0 -10   4   18.22    0.43
   2 -18   3    0.88    0.43
   1 -14  -1   63.58    0.67
   2 -17   4    2.11    0.43
   3 -19   3   33.19    0.67
   0 -12   1    2.75    0.37
   2 -18   2   18.43    0.58
   3 -18   4   46.02    0.73
   0 -12   2    6.96    0.40
   0  -9   4  225.60    1.14
   1 -15   0   17.34    0.50
   3 -19   1    3.84    0.42
   4 -19   0   38.87    0.65
   0 -11   3   91.78    0.80
   1 -14   4  284.34    1.68
   1 -12   5  594.70    2.23
   4 -19   3    4.04    0.35
   1 -15   3  336.59    1.78
   2 -17   0    5.13    0.49
   2 -16  -1    6.67    0.43
   3 -14   6    1.79    0.41
   0  -8   4  318.57    1.27
   2 -17   3   45.22    0.84
   2 -12   6   30.13    0.65
   0 -11   2   36.94    0.56
   1 -15   1   39.09    0.73
   2 -16   4    6.04    0.45
   4 -19   1    0.42    0.36
   0 -10   3   73.56    0.71
   1 -15   2  142.17    1.17
   3 -18   0   23.44    0.57
   3 -17  -1   13.20    0.53
   1 -11   5  814.30    2.49
   2 -17   2    2.76    0.54
   2 -14   5   42.84    0.85
   3 -17   4    9.77    0.52
   2 -11   6   45.38    0.78
   1 -14   3 1186.61    3.13
   3 -18   1   12.56    0.64
   3 -18   2   10.39    0.54
   3 -13   6   11.38    0.56
   1 -10   5   93.25    0.88
   2 -16   0   29.15    0.62
   2 -16   3    1.08    0.41
   2 -15  -1    2.62    0.41
   2 -15   4   -0.08    0.56
   4 -18   0   10.32    0.47
   1 -14   1  223.39    1.30
   1 -14   2   72.23    0.85
   1 -12  -1   44.34    0.54
   2 -13   5  210.84    1.46
   2 -10   6  141.84    1.16
   3 -17   0   34.11    0.70
   3 -17   3    6.35    0.49
   3 -16   4    3.62    0.53
   4 -18   1   37.41    0.72
   4 -18   2   12.66    0.48
   4 -13   6    0.19    0.40
   5 -18   1    3.91    0.34
   1 -13   0   19.46    0.46
   1 -13   3   40.24    0.71
   1  -9   5   87.86    0.84
   2 -16   2   18.22    0.67
   3 -16  -1   40.29    0.71
   2  -9   6  128.23    1.12
   3 -17   2    0.32    0.38
   3 -14   5    5.02    0.65
   1 -13   2   91.47    0.89
   1 -11   4   17.91    0.54
   2 -15   3  244.93    1.58
   2 -14   4   20.38    0.69
   3 -17   1    7.50    0.55
   1 -13   1    3.11    0.38
   1  -8   5   35.65    0.57
   2 -15   0   89.12    0.90
   2 -12   5  113.82    1.11
   4 -17   3    0.66    0.31
   4 -16   4   98.48    1.04
   5 -16   4  150.52    1.23
   1 -12   3    0.59    0.48
   3 -11   6    1.37    0.46
   4 -17   0   38.21    0.73
   4 -12   6    0.81    0.37
   3 -15   4   15.86    0.58
   1 -12   0   32.10    0.50
   1  -7   5  290.86    1.31
   2 -15   2    0.31    0.53
   4 -17   2   18.34    0.60
   4 -16  -1    1.28    0.46
   1 -10   4   40.19    0.62
   3 -16   0  127.07    1.12
   4 -14   5    1.86    0.33
   5 -17   1    0.61    0.38
   5 -14   5    0.07    0.22
   2 -13   4  191.95    1.40
   1 -12   1  211.78    1.17
   1 -12   2   50.01    0.68
   2 -14   3   57.41    0.89
   3 -16   2    5.03    0.51
   3 -10   6   21.84    0.71
   1 -11   3   54.00    0.70
   4 -16   3    5.60    0.52
   4 -15   4   66.87    0.95
   4 -11   6    5.18    0.47
   2 -14   0    2.86    0.40
   5 -16   3   12.18    0.48
   1  -9   4    0.58    0.36
   3 -15   3   22.79    0.69
   3 -14   4   56.58    0.90
   2 -14   2    9.23    0.58
   4 -16   0   21.89    0.65
   4 -13   5    6.58    0.56
   2 -14   1   15.94    0.56
   3 -12   5    5.04    0.53
   4 -16   2  158.00    1.50
   5 -16   0    2.29    0.44
   5 -13   5    1.20    0.34
   2 -13   3  121.18    1.14
   3 -15   0   45.49    0.83
   5 -16   2    1.03    0.33
   1 -11   1  435.51    1.56
   1 -10   3   54.87    0.69
   4 -16   1    0.19    0.51
   4 -10   6    4.04    0.43
   5 -16   1    0.07    0.44
   5 -10   6   57.72    0.88
   1  -8   4   19.22    0.55
   3 -15   2   40.33    0.83
   3 -14  -1   43.19    0.70
   5 -14   4    3.91    0.38
   6 -15   0    4.38    0.37
   2  -9   5  199.54    1.30
   3 -13   4    0.76    0.55
   3  -8   6    0.93    0.55
   5 -15   3    0.46    0.36
   6 -15   2   19.96    0.53
   3 -14   3   43.95    0.83
   3 -11   5   59.54    0.89
   4 -12   5   17.15    0.68
   1 -17  -1    4.03    0.45
   3 -18   3   25.92    0.62
   2 -19  -1   16.91    0.56
   2 -14   4   18.66    0.58
   3 -20   1    5.28    0.35
   1 -16  -2    0.96    0.39
   1  -9   4    0.24    0.38
   2 -19   0   45.67    0.70
   2 -17  -3   23.38    0.56
   3 -20  -1   35.32    0.61
   3 -20   0   18.62    0.54
   1 -15   2  135.78    1.03
   1 -13   3   41.35    0.61
   2 -18  -2    0.61    0.43
   2 -16   3    1.31    0.46
   4 -18   3   13.11    0.49
   4 -16   4   83.64    0.92
   1 -16   1  137.21    1.07
   1 -14  -3   55.48    0.68
   1 -16  -1    8.95    0.54
   2 -18   1   17.67    0.54
   2 -13   4  183.03    1.14
   3 -15   4   16.99    0.49
   1 -16   0   21.02    0.58
   2 -17   2    2.77    0.45
   3 -19  -2  104.24    0.98
   3 -17   3    6.29    0.52
   4 -19   2    6.99    0.35
   1 -15  -2    7.57    0.47
   4 -20   0   23.01    0.51
   2 -18  -1   50.38    0.76
   2 -18   0   53.31    0.78
   2 -15   3  248.13    1.40
   3 -18   2   10.43    0.48
   4 -15   4   63.57    0.76
   1 -13  -3   69.67    0.69
   2 -17  -2  213.24    1.27
   4 -19  -2    2.67    0.36
   1 -15  -1   50.74    0.68
   1 -15   0   17.43    0.61
   1 -11   3   52.84    0.57
   2 -17   1   41.09    0.71
   4 -19   1    0.30    0.28
   3 -16   3    0.06    0.45
   4 -18   2   11.82    0.49
   1 -14  -2    1.56    0.40
   3 -18  -2   18.60    0.59
   1 -14   1  231.03    1.21
   2 -11   4   79.59    0.76
   3 -18   1   12.73    0.53
   3 -17  -3    6.75    0.50
   1 -10   3   52.79    0.61
   1 -12  -3    0.50    0.41
   2 -15  -3   37.90    0.64
   3 -18   0   23.60    0.61
   4 -16   3    5.50    0.44
   1 -14  -1   59.49    0.67
   1 -14   0    0.00    0.38
   2 -16  -2    8.57    0.47
   2 -16   1    7.91    0.61
   3 -15   3   22.80    0.69
   4 -18   1   40.32    0.64
   1 -13  -2   26.02    0.47
   4 -17   2   18.09    0.52
   2 -16   0   30.10    0.69
   3 -17   1    7.82    0.49
   4 -17  -3    0.87    0.36
   3 -17  -2   46.18    0.70
   3 -12   4    1.73    0.44
   2  -9   4   21.13    0.51
   3 -16  -3   26.87    0.64
   1 -13   0   19.76    0.47
   2 -15  -2    9.12    0.53
   2 -12   3   17.35    0.49
   3 -17   0   34.69    0.66
   1 -12  -2    1.32    0.32
   3 -11   4   57.39    0.73
   4 -17   1    0.08    0.37
   4 -16   2  185.45    1.31
   5 -17   1    0.38    0.29
   2 -15   0   91.68    0.90
   4 -17  -2    4.37    0.40
   3 -16  -2   25.46    0.59
   4 -17   0   37.87    0.76
   4 -16  -3   -0.32    0.39
   1 -12  -1   44.50    0.53
   1 -12   0   32.56    0.52
   2 -11   3    6.54    0.36
   3 -13   3   92.59    0.94
   5 -17   0   -0.28    0.28
   5 -16  -3   28.89    0.56
   1 -11   1  445.57    1.37
   3 -16   0  130.54    1.07
   5 -17  -1    7.39    0.41
   2 -14  -2   19.88    0.50
   2 -13  -3   10.19    0.47
   3 -10   4   48.49    0.67
   6 -13   3   15.84    0.47
   1 -11  -2  477.26    1.32
   4 -16   1    0.39    0.51
   5 -16   1    0.16    0.29
   1 -11   0   16.50    0.40
   2 -12   2   26.91    0.54
   2 -10   3    3.12    0.36
   4 -16  -2    2.30    0.44
   1 -11  -1  398.97    1.23
   3 -12   3   26.76    0.58
   4 -13   3   31.54    0.63
   4 -15  -3    0.38    0.35
   5 -13   3   26.34    0.60
   6 -15   1    9.06    0.40
   3 -15   0   45.63    0.79
   3 -14  -3    0.31    0.40
   5 -16  -1    8.22    0.45
   5 -15  -3   21.67    0.55
   2 -13  -2  244.58    1.14
   3 -15  -1    9.88    0.55
   4 -10   4   16.88    0.58
   6 -12   3   35.68    0.63
   2 -12  -3   53.74    0.59
   6 -15  -2    4.61    0.30
   2  -9   3    5.77    0.35
   3 -14   1   11.61    0.59
   3 -13   2  212.96    1.24
   6 -15   0    3.12    0.36
   6 -15  -1    0.23    0.30
   3 -11   3   20.93    0.51
   4 -15  -2    1.66    0.45
   4 -12   3   26.00    0.58
   3 -14  -2    9.04    0.55
   4 -15   0   25.52    0.60
   5 -15  -2    1.25    0.45
   6 -13   2    0.42    0.37
   4 -15  -1    1.23    0.59
   4  -9   4   11.79    0.51
   5 -15   0   36.14    0.70
   6 -14   1  126.51    1.06
   3 -14   0    2.17    0.52
   4 -14  -3   -0.09    0.35
   6 -11   3   -0.25    0.35
   2 -12  -2   28.64    0.54
   3 -14  -1   44.44    0.70
   3 -13  -3    0.39    0.39
   5 -15  -1    5.51    0.39
   4 -14   1   12.67    0.55
   2 -12   0   28.51    0.52
   3 -13   1    6.54    0.54
   5 -14   1   27.25    0.65
   6 -14  -2    5.97    0.38
   6 -14   0    1.39    0.34
   4 -11   3   13.00    0.51
   2 -11   1  268.19    1.13
   5 -11   3   18.79    0.53
   6 -14  -1    6.78    0.36
   4 -14  -2    3.35    0.47
   4 -14   0   10.53    0.53
   6 -13   1    9.29    0.47
   5 -14  -2    0.59    0.38
   6 -10   3    2.15    0.39
   3 -13   0    0.42    0.50
   4 -14  -1    2.55    0.52
   5 -14  -1    9.10    0.48
   5 -12  -4    7.97    0.44
   2 -11  -2  403.24    1.30
   3 -12  -3   66.54    0.70
   3  -9   3    0.04    0.39
   5 -13  -3  132.81    1.04
   5 -13   1  131.40    1.15
   5 -12   2   69.69    0.86
   2 -11   0   51.88    0.58
   4 -10   3    1.61    0.39
   6 -13   0    4.38    0.35
   2 -10  -3   22.66    0.39
   5 -10   3    5.20    0.42
   6 -11   2   18.76    0.58
   2 -10   1  643.52    1.61
   6 -13  -1    1.88    0.32
   6  -9   3   14.65    0.53
   4 -13  -2   14.39    0.55
   4 -13   0  202.67    1.26
   6 -12  -3   12.46    0.47
   6 -12   1   13.30    0.47
   5 -13  -2    4.28    0.61
   3 -12  -2   16.22    0.51
   3 -12   0   27.88    0.59
   4 -13  -1    0.22    0.53
   4 -11  -4   28.47    0.61
   7  -9   2    0.13    0.36
   4 -12   1   13.51    0.63
   5 -11   2    7.97    0.54
   7 -11   0    1.87    0.33
   3 -12  -1    0.07    0.43
   3  -8   3    5.28    0.37
   4  -9   3    2.05    0.45
   2 -10  -2  138.29    0.81
   2 -10   0   67.73    0.61
   3 -11  -3  105.88    0.81
   3 -11   1   16.27    0.50
   5 -12  -3   51.89    0.72
   5  -9   3    2.06    0.38
   6 -12  -1    6.02    0.42
   4 -12   0  299.35    1.50
   6 -10  -4   -0.06    0.31
   4 -12  -2    0.99    0.48
   6 -11  -3   24.84    0.60
   3 -11   0  230.94    1.15
   4 -12  -1   70.13    0.87
   5 -10   2    0.40    0.60
   7 -10   0    3.06    0.33
   3 -11  -2  168.07    0.99
   3  -7   3  178.65    0.92
   4 -11   1    6.36    0.58
   4  -8   3   15.27    0.54
   5 -12  -1   31.31    0.64
   7 -10  -2    7.20    0.38
   3 -11  -1    0.77    0.52
   4 -11  -3  538.59    1.85
   4 -10  -4  169.49    1.08
   6 -11   0   17.24    0.59
   5 -11  -3  267.43    1.46
   6  -9   2   28.00    0.65
   6  -7   3   13.48    0.50
   6  -8   2   84.27    1.82
   6   0   3    0.11    1.15
   4 -13   0  204.39    2.21
   4  -5   3  304.22    2.48
   5  -9   2   -0.25    1.19
   7  -4   2   20.88    1.14
   3  -3   3  107.46    1.32
   5  -4   3  128.58    2.02
   5 -11   1   44.32    1.63
   6 -10   1    1.56    1.14
   6  -7   2    7.59    1.35
   7 -11  -1   14.74    0.90
   7  -3   2   39.42    1.43
   5  -3   3  759.24    3.95
   3 -13  -1   70.64    1.48
   3 -12   0   27.00    1.10
   7  -2   2    9.20    1.15
   4  -3   3   78.51    1.53
   5  -8   2   11.60    1.36
   5  -2   3  323.15    2.60
   7  -1   2    4.75    1.07
   4  -8   2   59.81    1.58
   5 -12   0   15.28    1.61
   5   1   3   24.58    1.33
   4  -2   3   16.98    1.03
   5   0   3  207.61    2.05
   6  -9   1   45.96    1.55
   3  -7   2  218.95    1.84
   4 -12   0  295.49    2.48
   6 -12  -1    6.95    1.04
   4  -1   3   95.34    1.41
   4   1   3   93.86    1.37
   5  -7   2   24.75    1.61
   7 -10  -1    5.79    0.87
   7  -6   1    2.96    0.93
   4  -7   2    7.07    1.20
   6  -8   1   33.29    1.45
   7  -8   0    0.32    0.77
   3 -11   0  233.46    1.88
   3  -6   2  195.28    1.71
   5  -6   2  207.17    2.52
   6  -4   2   94.18    1.87
   6 -11  -1  100.33    1.72
   7 -10  -2    6.06    0.72
   7  -9  -1    5.14    0.80
   5  -5   2  125.76    1.91
   6  -7   1  133.15    1.99
   6  -2   2   46.06    1.58
   3  -5   2   59.03    1.12
   4 -12  -1   71.32    1.47
   7  -3   1    4.91    1.08
   6  -9   0    0.56    1.08
   6  -1   2    3.48    1.05
   5 -10   0  724.88    3.90
   6   0   2   50.02    1.53
   7  -2   1   10.39    1.31
   3  -8   1  126.19    1.44
   6   2   2   42.89    1.41
   7  -8  -1    0.32    0.74
   7  -6   0    9.50    0.99
   5 -12  -2  171.25    1.86
   7  -1   1    0.14    1.16
   5 -11  -1  216.72    2.19
   4  -4   2  267.01    1.94
   5  -7   1  266.72    2.45
   6  -5   1   -0.42    1.15
   7  -9  -3   36.44    1.10
   7  -5   0   37.78    1.26
   5 -12  -3   56.15    1.44
   7  -7  -1   70.71    1.40
   4 -11  -1   43.68    1.20
   5  -9   0    3.01    1.34
   5  -2   2   10.35    1.14
   3  -7   1   78.60    1.17
   4  -7   1   12.62    1.03
   5  -1   2    0.90    0.96
   6 -10  -2    0.61    1.05
   6  -4   1   -0.52    1.32
   3  -9   0   39.22    0.97
   5  -6   1  775.13    3.53
   5 -11  -2    0.27    0.91
   5 -10  -1    1.53    1.15
   7  -8  -3   53.17    1.21
   5   2   2    9.74    0.97
   7  -7  -2   30.48    0.98
   3 -10  -1    0.84    0.70
   5 -11  -3  284.61    2.23
   5  -5   1  639.67    3.10
   7  -5  -1    0.53    0.73
   4 -11  -2  162.11    1.63
   4 -10  -1  101.20    1.43
   7  -1   0   55.08    1.39
   4  -8   0   26.34    1.06
   6  -1   1    0.27    1.02
   7  -6  -2   13.20    0.92
   5  -4   1   19.22    1.17
   6  -5   0    0.33    0.92
   7   0   0    1.01    0.91
   4  -5   1  447.14    2.17
   6   0   1   -0.43    0.96
   7   1   0   52.94    1.36
   4 -11  -3  552.54    2.56
   6  -9  -3    1.39    0.85
   7   2   0   43.78    1.25
   7   3   0    9.44    0.94
   7   4   0   38.32    1.18
   6   2   1   73.16    1.43
   6  -4   0   58.23    1.32
   6   3   1    2.15    0.82
   7  -5  -2    4.33    0.68
   7  -3  -1    0.69    0.76
   4  -9  -1  299.31    1.91
   5 -10  -3   96.90    1.34
   7  -6  -3    0.25    0.59
   3  -9  -1  142.56    1.20
   4  -7   0  609.94    2.47
   5  -8  -1  656.24    2.97
   5  -6   0  301.55    2.13
   3 -10  -2   74.51    1.03
   4  -4   1   77.39    1.09
   6  -6  -1    6.94    0.88
   7  -6  -4    0.69    0.53
   7  -2  -1    2.77    0.73
   3  -7   0   31.05    0.74
   5 -10  -4   15.13    1.04
   5  -9  -2  155.17    1.63
   6  -3   0  200.20    1.89
   6  -7  -2    0.19    0.76
   7  -5  -3   10.06    0.65
   6  -8  -5   18.34    0.76
   6  -8  -4   25.71    0.86
   6  -2   0   33.19    1.18
   7  -5  -4   15.86    0.73
   4 -10  -3  457.34    2.17
   4  -6   0   54.99    0.94
   5  -7  -1    1.42    0.95
   5  -9  -3    4.23    0.74
   7  -4  -3   13.72    0.75
   3  -8  -1    6.00    0.69
   4  -9  -2 1352.93    3.42
   5  -8  -2  156.27    1.64
   4  -2   1  464.25    1.82
   5  -4   0   20.76    1.02
   5   1   1   12.45    0.87
   6  -6  -2    0.41    0.69
   6  -4  -1    0.95    0.87
   7   2  -1    2.49    0.74
   5  -9  -4   18.45    0.83
   7   3  -1    0.57    0.68
   7   5  -1    0.15    0.61
   3  -9  -2   19.37    0.71
   5   2   1   51.33    0.88
   6   0   0    8.03    0.85
   6  -7  -5    7.51    0.68
   7  -3  -3    1.80    0.51
   7  -1  -2   10.46    0.78
   5   4   1   20.89    0.66
   4  -7  -1  312.07    1.60
   5  -3   0   23.72    0.87
   6  -5  -2    4.55    0.70
   6  -3  -1    1.51    0.77
   6  -6  -6   15.83    0.58
   6   2   0   33.99    0.89
   4  -9  -3   47.81    0.83
   6   3   0  195.45    1.47
   6   4   0   60.76    1.05
   6   5   0    0.27    0.74
   7  -2  -3    6.03    0.54
   4  -8  -2 1335.82    3.12
   3  -7  -1   33.05    0.58
   5  -5  -1   78.40    1.12
   6  -6  -4    1.81    0.71
   6  -2  -1   24.12    0.94
   4  -4   0    7.26    0.58
   5  -8  -5   14.91    0.78
   6  -6  -5   11.68    0.71
   6  -4  -2   11.99    0.71
   7  -2  -4    9.34    0.58
   7  -1  -3   11.74    0.57
   4  -9  -4   47.94    0.86
   3  -9  -3   64.90    0.77
   4  -6  -1   92.96    0.92
   6  -1  -1   12.06    0.86
   7   5  -2    4.73    0.65
   7   6  -2   14.96    0.65
   5  -6  -2  229.07    1.54
   6  -5  -6   -0.17    0.45
   7   0  -3   -0.27    0.48
   4   2   1  454.28    1.52
   5  -7  -3  355.09    1.88
   5  -4  -1   52.39    0.94
   5  -1   0   21.97    0.74
   7  -1  -4    2.45    0.44
   7  -1  -5    5.34    0.45
   4  -8  -3   54.81    0.88
   6  -5  -5    0.48    0.58
   7   1  -3   11.11    0.60
   7   0  -4    0.08    0.39
   5  -7  -4   10.99    0.62
   7   0  -5    1.91    0.39
   5  -7  -5    0.57    0.46
   6  -2  -2    1.67    0.58
  -1  -3   0 2484.39    0.85
  -3   0   1 4841.23    1.83
   1   8  -1 2172.46    1.22
  -1  -6  -1  119.70    0.22
  -2  -7  -1  112.78    0.29
  -1   4   1  323.73    0.14
   1   7  -1   84.00    0.25
   0   8   0    1.16    0.07
   0  -6  -2  178.05    0.15
   1   3  -1   45.54    0.18
   1   5  -1   34.21    0.18
  -1  -8  -2   76.17    0.20
   1   4  -1  335.56    0.43
  -1  -4   0   22.85    0.13
  -2  -6   0   34.20    0.17
  -1  -7  -1   74.08    0.20
   0   6   0    3.48    0.07
  -2  -3   1  153.14    0.30
  -1   1   1 1562.52    0.53
   0  10  -1  100.30    0.28
  -1  -5   0  563.12    0.46
   1   6  -2  527.35    0.66
  -1  10   0  117.19    0.25
  -2  -4   1   89.42    0.25
  -1  -9  -2    4.67    0.08
  -1   0   1   31.92    0.11
   1   5  -2    3.72    0.14
   0   9  -1   22.48    0.14
   1   0  -2    0.02    0.07
  -3   2   2    4.76    0.10
  -3   3   2   22.78    0.14
   1  -3  -4  339.17    0.40
   1   4  -2   57.25    0.20
  -3   1   2  129.54    0.31
   0   4   0  970.62    0.44
   1   3  -2  545.35    0.53
  -3   4   2   83.52    0.22
  -1  -8  -1  342.33    0.48
  -1  -1   1 1531.86    0.64
  -2  -5   1   45.82    0.20
   0   8  -1   14.89    0.12
   0   3   0    0.16    0.05
  -1  -2   1  481.88    0.41
   1   3  -3   57.85    0.22
   1   0  -4    0.06    0.07
  -1  -4   3  189.37    0.41
   0   3   0    0.04    0.06
  -1  10   1   11.90    0.13
  -1   1   4   10.86    0.13
  -1   0   4    0.19    0.09
  -1   2   4   15.42    0.13
  -1  -8   0  238.31    0.42
  -1  -1   4    9.64    0.14
  -1   3   4  367.34    0.40
  -1  -2   4   14.40    0.16
  -1   9   0  150.36    0.40
  -1  -2  -3  590.03    0.44
  -1   2  -3  595.43    0.64
  -1  -8  -1  391.36    0.50
   0  -1   1 1792.27    0.59
  -1   1  -3  321.50    0.44
  -1   6  -2  548.42    0.72
  -1   8   2  147.95    0.28
  -1  -1  -3  325.30    0.37
  -1   0  -3  616.08    0.55
   0  -2   1   13.16    0.11
  -1   7  -1   73.27    0.27
  -1   8   0  249.34    0.46
  -2   0  -4  662.35    0.75
  -1   5  -2   63.60    0.25
   0  -3   1 1417.84    0.68
  -1   8   1 2131.53    1.12
   0  -2   2 7099.20    1.66
   0  -4   1  152.10    0.28
   0  -3   2 9999.00    2.15
   0  -3   0    0.08    0.06
  -1   6  -1  125.31    0.32
   0  -4   2 4583.07    1.58
   0  -5   2  402.50    0.52
   0  -4   0  885.59    0.49
  -1   7   2   14.60    0.11
   0  -6   2  179.66    0.38
   0  -2   3    1.89    0.09
  -1   5  -1   73.69    0.23
   0  -5   3    2.67    0.12
   3   8   4    5.11    0.16
   1  -9   2    4.71    0.09
   2   0   1    0.07    0.10
   2   1   1  103.92    0.27
   3  -8   5   75.87    0.42
   3  -7   4    0.21    0.12
   3   6   3  271.04    0.58
   2  -9   3    5.90    0.13
   2  -1   1  100.33    0.27
   2   2   1  274.08    0.41
   4   0   5    0.08    0.15
   4   1   5  147.35    0.60
   1   7   1   73.22    0.14
   4  -1   5  148.72    0.61
   2  -7   2   57.63    0.25
   4  -2   5   12.83    0.24
   4   3   5   19.19    0.26
   2  -2   1  274.95    0.42
   3   0   2   -0.05    0.09
   3   1   2   46.29    0.25
   3   2   2   97.97    0.34
   3  -6   3  269.91    0.61
   3   7   3  183.88    0.49
   4  -3   5   19.48    0.26
   4   4   5    9.53    0.22
   3  -9   5   24.37    0.26
   3  -8   4    4.99    0.15
   3  -2   2   95.74    0.34
   4   0   4   12.96    0.21
   4   1   4   51.54    0.34
   2  -3   1  187.14    0.36
   4  -4   5    9.29    0.22
   4  -1   4   51.22    0.35
   2   4   1  634.98    0.60
   3  -3   2  713.52    0.89
   4  -2   4  107.64    0.48
   4   3   4   10.21    0.19
   4  -3   4    9.29    0.22
   3  -7   3  173.60    0.50
   4   4   4    5.34    0.16
   2 -10   3    3.19    0.11
   3  -4   2   65.31    0.29
   2  -8   2   25.95    0.18
   2  -4   1  606.50    0.64
   3  -9   4   11.78    0.18
   3   8   3    5.44    0.14
   4  -4   4    4.74    0.16
   3   5   2   59.75    0.26
   4   5   4   54.08    0.34
   2   5   1    7.21    0.11
   1  -7   1   71.84    0.18
   3  -5   2   57.68    0.28
   4  -1   3   94.93    0.42
   4   0   3    0.05    0.13
   4   1   3   94.56    0.41
   3  -8   3    4.91    0.14
   4  -2   3   16.40    0.21
   4   2   3   16.47    0.21
   4   6   4    0.61    0.15
   4   3   3   79.24    0.38
   3   6   2  199.28    0.46
   4  -6   4    0.54    0.16
   4   4   3  257.55    0.66
   3  -6   2  194.37    0.48
   4  -4   3  250.25    0.67
   2  -9   2    0.25    0.08
   4   7   4   26.44    0.27
   2   6   1  303.94    0.40
   4  -7   4   27.36    0.28
   3  -9   3    0.20    0.10
   4   5   3  309.41    0.71
   2  -6   1  292.03    0.45
   4  -5   3  299.34    0.73
   3  -7   2  220.43    0.51
   3   0   1  182.23    0.42
   3   1   1   19.23    0.17
   3   2   1  741.40    0.82
   4  -8   4   36.05    0.30
   4  -6   3   33.47    0.27
   4   6   3   34.39    0.26
   3  -2   1  723.55    0.83
   4  -1   2   66.52    0.33
   4   0   2   21.57    0.20
   4   1   2   69.66    0.33
   1   0   0    0.05    0.05
   4  -2   2    0.20    0.11
   4   2   2    0.04    0.12
   1  -8   1  293.62    0.36
   3 -10   3    0.37    0.12
   3  -3   1  563.89    0.74
   1  -1   0 1947.88    0.72
   1   1   0 2010.27    0.70
   4  -7   3    6.68    0.17
   4  -3   2   36.17    0.26
   4   3   2   37.80    0.26
   2 -10   2  169.67    0.39
   2  -7   1  112.89    0.30
   3  -8   2   40.73    0.24
   3   8   2   41.43    0.22
   4   7   3    6.53    0.15
   3  -4   1  335.74    0.58
   3   4   1  353.27    0.56
   4  -9   4   10.23    0.20
   4  -4   2  273.05    0.65
   1  -2   0 1692.73    0.69
   4   4   2  282.69    0.63
   1   2   0 1717.06    0.63
   4  -8   3   14.42    0.20
   4  -5   2    0.30    0.12
   3  -5   1  103.19    0.33
   5  -1   3   23.68    0.27
   5   0   3  208.93    0.68
   5   1   3   24.92    0.27
   3  -9   2   28.01    0.21
   5  -2   3  328.58    0.86
   5  -3   3  762.36    1.29
   2  -8   1   77.41    0.25
   3  -6   1    1.25    0.11
   5   3   3  777.65    1.28
   2  -1   0  614.27    0.58
   2   0   0  143.21    0.28
   2   1   0  633.61    0.58
   4  -9   3    1.74    0.14
   5  -4   3  128.34    0.55
   5   4   3  132.64    0.55
   2  -2   0  708.58    0.63
   3   6   1    1.32    0.10
   4  -7   2    6.39    0.16
   2   2   0  723.18    0.61
   5  -5   3    0.54    0.14
   4  -1   1  107.58    0.39
   4   1   1  106.98    0.39
   5   5   3    0.28    0.14
   2  -3   0   11.00    0.12
   3 -10   2    1.78    0.11
   3  -7   1   79.46    0.30
   4  -2   1  461.35    0.79
   4   2   1  470.49    0.79
   4   7   2    7.05    0.16
   4  -3   1    0.49    0.11
   4 -10   3    1.54    0.12
   4  -8   2   58.09    0.33
   5  -1   2    0.84    0.13
   5   0   2   -0.18    0.13
   4  -4   1   79.23    0.35
   5  -2   2   10.61    0.19
   5   1   2    1.22    0.14
   5   6   3   21.53    0.24
   2  -4   0  466.41    0.53
   5  -3   2   78.71    0.41
   3  -8   1  131.32    0.38
   4  -5   1  455.07    0.81
   5  -4   2   11.79    0.20
   5   3   2   80.33    0.41
   3  -1   0  326.25    0.54
   3   0   0    0.00    0.11
   2   4   0  476.49    0.49
   3  -2   0    1.87    0.10
   3   1   0  331.21    0.54
   4  -9   2    4.01    0.15
   5  -5   2  122.53    0.52
   5   4   2   11.51    0.19
   1  -5   0  568.11    0.43
   3  -3   0  561.73    0.72
   3   2   0    1.76    0.11
   3  -4   0   -0.09    0.10
   4  -7   1   12.59    0.17
   2  -6   0   34.59    0.17
   4 -10   2    5.87    0.14
   4   6   1   81.36    0.34
   5  -7   2   23.53    0.26
   2 -10   1  645.31    0.67
   3  -5   0  119.73    0.35
   5  -1   1   12.59    0.21
   5   6   2  212.64    0.63
   3   4   0   -0.09    0.09
   5  -2   1   53.17    0.34
   5   0   1    0.83    0.12
   5   1   1   12.68    0.20
   4  -8   1    8.64    0.15
   4  -1   0   68.50    0.31
   4   0   0   15.84    0.18
   5  -4   1   19.83    0.23
   1  -6   0  196.29    0.26
   3  -6   0   79.04    0.29
   4  -2   0   53.25    0.28
   5   3   1    1.22    0.12
   2  -7   0   31.43    0.17
   3 -10   1   11.16    0.14
   4  -3   0    3.63    0.13
   4   2   0   55.31    0.29
   5  -5   1  627.63    1.12
   5   4   1   20.91    0.23
   4  -4   0    7.49    0.15
   4  -9   1    8.09    0.15
   4   3   0    3.81    0.11
   3  -7   0   32.84    0.20
   2   6   0   35.39    0.14
   4  -5   0   22.44    0.20
   5   5   1  653.22    1.10
   1   5   0  575.14    0.33
   4   4   0    7.51    0.14
   5  -7   1  273.73    0.76
   2  -8   0  992.85    0.81
   4 -10   1    5.86    0.15
   3  -8   0   56.72    0.26
   4   5   0   23.06    0.20
   5  -8   1    2.40    0.15
   5  -1   0   20.94    0.23
   1  -7   0  128.72    0.21
   4  -7   0  605.42    0.95
   5  -2   0    1.81    0.14
   5   1   0   21.34    0.25
   5  -3   0   23.75    0.24
   5  -4   0   20.71    0.23
   3  -2  -1   81.56    0.29
   3  -1  -1   16.05    0.15
   3   0  -1 4730.79    2.10
   4   6   0   57.08    0.29
   5   3   0   24.15    0.24
   3  -9   0   38.70    0.22
   4  -8   0   25.51    0.22
   5  -5   0    1.74    0.14
   2  -2  -1   18.45    0.14
   2  -1  -1  638.74    0.63
   2   7   0   31.57    0.13
   3  -3  -1  177.84    0.43
   2  -9   0 1560.63    1.05
   5   4   0   20.13    0.23
   2  -3  -1  146.77    0.32
   2   1  -1  656.55    0.63
   3  -4  -1   35.98    0.22
   3   2  -1   79.16    0.29
   4  -2  -1  108.94    0.41
   4  -1  -1   32.13    0.23
   4   0  -1    0.12    0.11
   4  -9   0    0.13    0.13
   2  -4  -1   87.75    0.26
   3  -5  -1    1.82    0.11
   4  -3  -1   32.41    0.24
   4   1  -1   33.38    0.24
   4   7   0  631.18    0.90
   5  -7   0    5.98    0.17
   5   5   0    1.56    0.14
   2   2  -1   18.89    0.14
   4  -4  -1    2.48    0.11
   3 -10   0    0.22    0.09
   4   2  -1  114.68    0.41
   1  -8   0  243.42    0.29
   3  -6  -1    1.24    0.10
   4  -5  -1    0.70    0.12
   4   3  -1   32.36    0.23
   3   4  -1   37.55    0.21
   5   6   0  305.20    0.76
   4 -10   0   77.52    0.37
   2 -10   0   65.64    0.23
   5  -2  -1    5.58    0.16
   5  -1  -1   29.66    0.27
   3  -7  -1   34.29    0.22
   4   4  -1    2.70    0.11
   5  -3  -1    3.20    0.15
   5   0  -1   19.69    0.23
   5  -9   0    3.72    0.17
   5   1  -1   30.34    0.28
   5  -4  -1   49.38    0.35
   3   5  -1    1.80    0.09
   2   4  -1   88.92    0.25
   1   6   0  196.92    0.18
   4   5  -1    0.77    0.10
   5   3  -1    3.54    0.14
   3  -8  -1    5.87    0.12
   5   4  -1   49.86    0.34
   1  -1  -1 1534.03    0.77
   5  -7  -1    1.75    0.15
   1  -2  -1  462.99    0.43
   3   6  -1    1.32    0.10
   4   6  -1   91.94    0.38
   1   0  -1   31.51    0.14
   1  -3  -1   45.70    0.16
   4  -9  -1  293.83    0.73
   5   5  -1   78.01    0.42
   2   5  -1   46.50    0.19
   3  -9  -1  137.80    0.42
   1  -9   0  145.68    0.23
   4  -2  -2   10.65    0.17
   4  -1  -2    2.21    0.13
   1   1  -1 1561.65    0.76
   2  -8  -1  531.89    0.66
   3  -2  -2    4.91    0.12
   3  -1  -2  122.03    0.39
   4  -3  -2    4.72    0.14
   4   0  -2    0.37    0.11
   1  -4  -1  321.87    0.38
   3  -3  -2   22.48    0.19
   4  -4  -2    4.30    0.14
   4   1  -2    2.11    0.12
   4   7  -1  314.64    0.68
   5   6  -1    1.33    0.14
   4 -10  -1   99.16    0.44
   4  -5  -2   96.29    0.43
   5  -9  -1  834.48    1.42
   5  -2  -2   47.17    0.36
   5  -1  -2   13.44    0.22
   5   0  -2    0.00    0.15
   3 -10  -1    0.21    0.09
   3  -5  -2    8.29    0.15
   3   2  -2    5.00    0.13
   5  -3  -2    7.19    0.18
   4   3  -2    4.49    0.14
   5   1  -2   13.53    0.22
   1   2  -1  472.78    0.42
   3  -6  -2   49.09    0.27
   5  -5  -2   55.42    0.40
   2  -9  -1  328.46    0.53
   2   6  -1  301.69    0.43
   2  -2  -2  237.64    0.47
   4  -7  -2    3.03    0.14
   4   4  -2    4.53    0.13
   5   3  -2    7.14    0.17
   2  -3  -2  100.33    0.32
   2   0  -2  333.21    0.54
   3  -7  -2    3.29    0.12
   2  -4  -2   18.21    0.16
   3   4  -2   84.68    0.33
   5   4  -2   32.06    0.31
   1  -6  -1  369.34    0.42
   2   1  -2 1480.21    1.13
   2   2  -2  246.19    0.47
   3  -8  -2   24.27    0.21
   5  -8  -2  145.27    0.66
   5   5  -2   57.75    0.39
   2 -10  -1   72.30    0.26
   4  -9  -2 1295.71    1.63
   2  -6  -2   12.05    0.16
   4   6  -2   28.36    0.26
   4  -2  -3    4.35    0.16
   4  -1  -3    7.41    0.18
   1  -7  -1   82.16    0.21
   2   7  -1  126.05    0.29
   3  -9  -2   19.13    0.21
   4  -3  -3    6.16    0.17
   4   0  -3   -0.13    0.11
   5   6  -2  219.61    0.75
   4  -4  -3    1.03    0.14
   4   1  -3    7.17    0.17
   5  -3  -3    3.30    0.18
   5  -2  -3   37.77    0.37
   5  -1  -3   23.20    0.30
   3   6  -2   47.78    0.27
   5  -4  -3    2.64    0.17
   5   0  -3   13.37    0.24
   2  -7  -2 1101.83    1.09
   3  -2  -3  307.37    0.71
   4  -5  -3    8.46    0.19
   5   1  -3   23.56    0.30
   3  -3  -3  545.26    0.95
   3  -1  -3    0.36    0.11
   5  -5  -3    1.99    0.18
   1   4  -1  332.04    0.37
   2   4  -2   17.90    0.16
   3  -4  -3  295.47    0.71
   3   0  -3  142.10    0.48
   5   2  -3   37.73    0.37
   3   1  -3    0.35    0.11
   4   3  -3    5.96    0.19
   3 -10  -2   71.76    0.36
   5   3  -3    2.93    0.18
   3  -5  -3   11.32    0.18
   4  -7  -3   16.40    0.25
   2  -8  -2   64.89    0.28
   3   2  -3  313.67    0.71
   3  -6  -3   31.97    0.27
   5   4  -3    2.74    0.17
   4  -8  -3   49.57    0.38
   2   5  -2    5.56    0.12
   3  -7  -3  284.42    0.74
   4   5  -3    8.45    0.19
   5   5  -3    1.91    0.17
   2  -9  -2   16.40    0.16
   1  -2  -2  913.44    0.82
   2  -2  -3  515.29    0.82
   3   4  -3  295.41    0.71
   4  -9  -3   46.81    0.38
   1  -3  -2  547.60    0.64
   1  -1  -2  263.61    0.45
   2  -3  -3  213.76    0.55
   2  -1  -3  328.39    0.66
   3  -8  -3  123.63    0.50
   2   0  -3    0.18    0.11
   1   0  -2    0.01    0.12
   2  -4  -3  169.73    0.49
   5   6  -3   22.71    0.30
   1  -4  -2   60.40    0.24
   2   1  -3  347.12    0.68
   4  -3  -4    4.10    0.19
   4  -2  -4    0.71    0.15
   4  -1  -4    8.91    0.21
   2   6  -2   11.96    0.15
   3   5  -3   11.53    0.18
   4  -4  -4  142.98    0.66
   4   0  -4    2.58    0.17
   1   1  -2  139.51    0.34
   4   1  -4    8.52    0.22
   2   2  -3  519.43    0.83
   3  -9  -3   61.62    0.38
   4  -5  -4  651.56    1.40
   2 -10  -2  132.36    0.42
   2  -6  -3   12.99    0.18
   4  -6  -4  841.94    1.62
   3  -2  -4   30.21    0.30
   4   7  -3   15.50    0.25
   1   2  -2  960.82    0.88
   3  -3  -4   -0.09    0.14
   4   3  -4    4.19    0.18
   1  -6  -2  578.83    0.70
   2  -7  -3   26.41    0.23
   3  -4  -4    0.23    0.14
   4  -7  -4  176.38    0.78
   3 -10  -3   62.22    0.39
   3  -5  -4   18.61    0.26
   3   1  -4    0.34    0.14
   3   2  -4   30.86    0.31
   4   4  -4  137.87    0.66
   3  -6  -4  135.24    0.59
   2  -8  -3    0.23    0.12
   2   4  -3  165.60    0.50
   2   7  -2 1127.42    1.07
   1   3  -2  525.94    0.64
   1  -7  -2   11.18    0.14
   3  -7  -4  366.23    0.98
   3   7  -3  285.45    0.75
   4   5  -4  668.03    1.41
   2   5  -3  398.45    0.78
   3  -8  -4   88.32    0.51
   3   4  -4    0.41    0.14
   2  -9  -3   28.35    0.24
   4  -3  -5   14.69    0.31
   4  -2  -5    9.86    0.27
   4  -1  -5    6.73    0.24
   2  -3  -4   69.35    0.40
   2  -2  -4  209.43    0.66
   2  -1  -4   22.82    0.25
   4  -4  -5   17.73    0.32
   4   0  -5   -0.28    0.18
   2  -4  -4  126.84    0.53
   2   0  -4  128.66    0.52
   1   4  -2   57.77    0.24
   4   1  -5    7.62    0.27
   1  -2  -3   89.83    0.37
   2   1  -4   24.46    0.26
   3   5  -4   18.22    0.25
   3   8  -3  118.90    0.50
   1  -1  -3   58.28    0.31
   1  -4  -3  160.81    0.49
   1   0  -3   76.34    0.35
   2 -10  -3   20.90    0.23
   2   2  -4  209.09    0.67
   2   8  -2   64.49    0.28
   3  -2  -5   34.12    0.38
   4   7  -4  174.02    0.80
   3  -3  -5    0.24    0.17
   3  -1  -5    1.47    0.19
   3   0  -5   12.13    0.28
   1   1  -3   62.27    0.32
   3 -10  -4   55.39    0.45
   3   6  -4  131.48    0.62
   2  -7  -4    4.63    0.19
   4   4  -5   18.26    0.36
   1  -6  -3  970.00    1.16
   1   2  -3   91.21    0.38
   1   5  -2    4.43    0.16
   2  -8  -4    8.98    0.20
   2   4  -4  123.91    0.53
   3  -7  -5    5.23    0.23
   3   3  -5    0.70    0.19
   2   7  -3   25.96    0.24
   3   7  -4  374.15    1.05
   1  -7  -3  452.82    0.81
   1   3  -3   56.42    0.32
   3  -8  -5   31.72    0.39
   3   4  -5  156.00    0.75
   2  -9  -4  107.71    0.55
   2   5  -4  225.74    0.72
   4   6  -5  108.72    0.72
   2  -2  -5  145.60    0.67
   2  -1  -5   18.99    0.30
   2  -4  -5   84.41    0.53
   2   0  -5    0.02    0.18
   0  -2  -1   12.91    0.11
   3  -9  -5  132.95    0.74
   3   5  -5  404.55    1.20
   2   1  -5   19.45    0.30
   0  -3  -1 1444.82    0.75
   0  -1  -1 1740.82    0.82
   1  -3  -4  337.53    0.83
   1   6  -2  557.57    0.73
   2  -6  -5   49.34    0.49
   1  -4  -4  166.44    0.60
   1   0  -4   -0.17    0.16
   2   2  -5  148.03    0.69
   2   6  -4    0.92    0.16
   2   8  -3    0.51    0.14
   3  -3  -6  140.37    0.83
   3  -1  -6    0.74    0.25
   3  -4  -6  548.54    1.60
   3   0  -6    0.33    0.24
   2  -7  -5   17.94    0.32
   3   1  -6    0.85    0.23
   0   0  -1   -0.11    0.08
   1  -9  -3  167.46    0.52
   1  -6  -4   11.21    0.31
   1   5  -3 1182.02    1.34
   2  -8  -5   29.92    0.39
   2   4  -5   87.07    0.55
   3   3  -6  139.07    0.84
   1  10   1   99.57    0.38
   5   7   0    5.40    0.30
   4   9   0    0.26    0.23
   2   9   0 1594.64    1.87
   4  -4  -1    2.53    0.18
   3  -5  -1    1.75    0.15
   2   5  -1   44.81    0.38
   3  10   0    0.36    0.23
   5   2  -1    5.72    0.32
   4  -5  -1    0.90    0.19
   4   6  -1   92.64    0.69
   4  10   0   80.56    0.70
   5  -3  -1    3.61    0.31
   5   4  -1   51.24    0.62
   2   6  -1  303.08    0.90
   4   7  -1  321.01    1.30
   5   5  -1   79.47    0.77
   1   8   0  253.63    0.67
   3  -6  -1    1.32    0.18
   5  -4  -1   50.47    0.56
   5   6  -1    1.50    0.34
   4   8  -1  311.97    1.40
   4  11   0  580.22    2.00
   1   1  -1 1616.37    1.39
   2  -5  -1   47.12    0.28
   5   7  -1    1.83    0.42
   4   2  -2   10.94    0.43
   5   8  -1  631.29    2.42
   1  -1  -1 1585.32    1.28
   3   1  -2  127.73    0.76
   3  12   0   28.02    0.57
   4  -1  -2    2.20    0.30
   4   4  -2    4.70    0.39
   3   4  -2   86.16    0.69
   4  -2  -2   11.43    0.38
   5   1  -2   13.14    0.48
   3  -2  -2    4.86    0.31
   3   5  -2    8.12    0.38
   3  10  -1    0.43    0.32
   5   0  -2    0.11    0.34
   1   5  -1   34.84    0.44
   4  -3  -2    4.14    0.41
   5   4  -2   33.16    0.66
   1  -2  -1  489.10    0.72
   4   7  -2    3.13    0.43
   4  11  -1   43.00    0.76
   5   6  -2  227.07    1.60
   2   1  -2 1528.23    2.17
   4  -4  -2    4.80    0.36
   5  -3  -2    7.43    0.49
   2  -6  -1  297.87    0.63
   2   0  -2  360.82    1.07
   3  11  -1    0.71    0.36
   2   4  -2   18.36    0.48
   5   7  -2  113.73    1.18
   3  -4  -2   82.61    0.59
   4  12  -1   71.47    0.95
   4  -5  -2   99.56    0.75
   1   7  -1   80.98    0.60
   2   6  -2   11.25    0.44
   2  -2  -2  243.01    0.86
   3   9  -2   19.30    0.54
   1  -3  -1   45.95    0.29
   2  11  -1    0.23    0.38
   3  -5  -2    8.09    0.30
   4   3  -3    5.45    0.46
   1   8  -1 2163.10    2.57
   3  10  -2   70.61    0.88
   4   0  -3    0.27    0.37
   4   5  -3    8.72    0.52
   5   1  -3   22.76    0.67
   5   2  -3   37.06    0.79
   0   5   0    0.08    0.17
   2  -3  -2  100.52    0.61
   5   4  -3    2.39    0.50
   3   2  -3  306.31    1.38
   3   3  -3  546.49    1.87
   3  13  -1   69.75    0.88
   4   6  -3  151.91    1.27
   3   1  -3    0.28    0.36
   3   4  -3  289.52    1.43
   4   7  -3   15.30    0.62
   4  -2  -3    3.98    0.40
   3   6  -3   31.55    0.61
   2   9  -2   17.17    0.44
   2  12  -1  154.86    0.99
   4   8  -3   49.51    0.85
   1   9  -1  794.13    1.64
   3   7  -3  282.10    1.53
   4  -3  -3    5.80    0.50
   3   8  -3  117.08    1.07
   3  12  -2   15.67    0.60
   2  10  -2  132.19    0.94
   1   2  -2  909.02    1.60
   1   3  -2  511.69    1.25
   1   4  -2   54.25    0.56
   2   3  -3  194.72    1.02
   2   2  -3  464.05    1.50
   2   1  -3  308.61    1.21
   2   5  -3  367.84    1.44
   2   6  -3   11.79    0.45
   2   0  -3    0.68    0.37
   4   3  -4    4.35    0.51
   2   7  -3   24.16    0.58
   0   7   0    0.17    0.16
   1  11  -1  403.42    1.28
   3   2  -4   28.53    0.59
   3   0  -4   -0.03    0.36
   2  -3  -3  177.69    0.80
   3  13  -3    0.05    0.40
   2   3  -4   62.19    0.68
   2   7  -4    5.15    0.43
   1   2  -3   86.69    0.60
   1   1  -3   60.22    0.53
   4   0  -5    0.23    0.40
   3   3  -5    0.80    0.37
   1   0  -3   87.56    0.57
   3  -4  -4    0.15    0.29
   0   9   0    0.44    0.12
   1   5  -4 1018.51    2.20
   2   7  -5   16.31    0.47
   1   2  -4   14.05    0.33
   0   4  -2 4334.07    2.69
   0   3  -2 9922.43    3.93
   1   1  -4   10.06    0.32
   3  -3  -5    0.18    0.30
   1  12  -3    0.51    0.29
   1   9  -4   21.45    0.40
   2  -4  -4  127.00    0.63
   1  -3  -3   57.47    0.37
   1  10  -4   12.76    0.34
   3  -4  -5  161.90    0.85
   3   0  -6    0.05    0.29
   0   1  -2  636.04    0.89
   2  -2  -5  154.84    0.78
   0   9  -2    0.86    0.17
   1  11  -4   77.23    0.64
   2   5  -6   67.85    0.68
   0   4  -3   52.65    0.39
   0   5  -3    3.43    0.23
   1   4  -5  271.14    1.05
   1   5  -5   89.73    0.77
   1   6  -5   31.89    0.44
   2   6  -6    4.69    0.37
   1   3  -5  170.44    0.86
   1   7  -5   94.94    0.78
   2   3  -6  166.11    1.00
   2   7  -6   67.58    0.72
   0   3  -3 1145.66    1.45
   2   2  -6   11.44    0.36
   2   8  -6    2.04    0.32
   0  10  -2   94.29    0.44
   1  -2  -4   14.20    0.27
   1   2  -5  324.72    1.07
   1  12  -4   57.04    0.60
   2  -3  -5  226.76    0.86
   3  -2  -6    0.18    0.27
   0   0  -2    4.83    0.23
   0   2  -3    2.02    0.21
   2   0  -6    7.19    0.29
   1  10  -5   17.58    0.39
   0   1  -3   53.39    0.34
   2  -1  -6   35.36    0.41
   0   0  -3    5.71    0.18
   2  -6  -4    1.01    0.14
   0   2  -4  640.21    1.09
   1   7  -6   18.97    0.48
   2  -2  -6   11.40    0.28
   1  -2  -5  349.50    0.88
   1   2  -6  110.70    0.62
   0   1  -4  245.47    0.65
   1  -5  -3 1235.90    1.11
   0  -1  -3   51.74    0.28
   1   1  -6    3.73    0.23
   0   0  -4   16.76    0.22
   2   0  -7   -0.13    0.20
   0   3  -5  171.34    0.62
   0   2  -5    2.56    0.17
   1  -1  -6    3.68    0.18
   2  -4  -6   25.53    0.30
   0  -2  -3    2.05    0.14
   0  -1  -4  242.70    0.58
   0   9  -5  162.32    0.65
   1  -5  -4 1075.60    1.29
   1   4  -7    1.08    0.20
   1  -4  -5  272.16    0.65
   1  -2  -6  102.46    0.48
   2  -2  -7   39.00    0.38
   1   2  -7  147.75    0.70
   0   0  -5   -0.08    0.12
   0   5  -6   24.12    0.28
   0   6  -6   20.66    0.27
   0   4  -6  120.86    0.54
   0   7  -6  572.46    1.19
   0   3  -6   47.88    0.35
   0   8  -6  142.48    0.63
   1  -6  -3 1072.54    0.77
   2  -3  -7   16.85    0.25
   0  -1  -5   68.02    0.33
   1  -3  -6  103.27    0.44
   1   0  -7  340.64    0.96
   0  -2  -1   12.91    0.07
   0   2  -6   37.86    0.31
   0   9  -6  272.46    0.87
   0  12  -5  133.09    0.56
   1  -6  -2  511.59    0.38
   0   1  -6  141.04    0.53
  -1   6  -3  142.99    0.38
   0  10  -6   65.09    0.43
   1  -1  -7   12.44    0.24
  -1   4  -3 1610.77    1.17
  -1   7  -3   85.70    0.31
   0   0  -6   14.61    0.22
  -1   3  -3   10.59    0.14
  -1   5  -4 2086.81    1.58
  -1   6  -2  484.66    0.56
  -1   8  -3   29.84    0.20
  -1   7  -4    0.83    0.10
  -1   4  -2   33.63    0.16
   0   5  -7    4.59    0.17
  -1   2  -3  501.68    0.62
  -1   3  -4   49.15    0.25
   0   4  -7   13.20    0.23
  -1   9  -3   11.42    0.18
   0   3  -7    9.23    0.20
  -1   2  -4   95.26    0.32
   0  -3  -5  139.83    0.40
  -1   5  -5  341.05    0.70
   0   2  -7   77.96    0.43
  -1   7  -5  279.67    0.65
  -1   1  -4   61.29    0.25
  -1   3  -5  182.45    0.49
   0  -2  -6   33.44    0.24
   0   1  -7  168.79    0.60
  -1   2  -5   72.84    0.34
   0  -4  -5  324.38    0.58
  -1   0  -4   -0.01    0.09
  -1  11  -4   21.89    0.21
   1  -4  -7    0.54    0.11
   0  -3  -6   39.29    0.25
  -1   3  -6   12.97    0.19
   0  -1  -7  159.98    0.55
  -1  -1  -4   60.23    0.24
   0  -5  -3    2.84    0.08
  -1   1  -6   10.64    0.17
   0  -4  -6  104.04    0.38
  -1   0  -2    0.02    0.09
  -1   0  -6   -0.18    0.11
  -1   4  -7    3.74    0.15
  -1  -2  -4   92.13    0.29
  -1   3  -7   15.52    0.23
   0  -3  -7    8.68    0.17
  -1   2  -7   74.39    0.42
  -1  -2  -3  502.80    0.56
  -1  -1  -6   10.72    0.17
  -1   1  -7   14.32    0.22
   0  -6  -4 1343.34    0.97
  -1  -1  -2 2560.47    1.06
   0  -4  -7   14.84    0.21
  -1   0  -7   89.08    0.49
   0  -6  -5   30.29    0.19
  -2   4  -4    8.89    0.16
  -2   6  -5  236.16    0.62
  -2   6  -4  223.55    0.53
  -1  -3  -3   11.57    0.14
   0  -6  -3   47.44    0.17
   0  -5  -2  417.17    0.37
  -2   7  -5   42.80    0.29
   0  -6  -6   20.34    0.21
   0  -5  -7    4.71    0.15
  -2   2  -5   14.59    0.21
  -2   4  -6  154.21    0.61
  -2   5  -6    7.74    0.22
  -2   7  -3    0.87    0.11
  -1  -2  -2 7236.13    1.91
  -2   3  -3   43.72    0.27
  -4  -5   5  159.39    0.64
  -3 -11   2  167.04    0.55
  -3 -12   1   -0.08    0.19
  -4 -13   1    0.24    0.17
  -3  -3   5    1.17    0.16
  -3 -10   3   64.43    0.39
  -1  -6   2  556.71    0.70
  -1  -3   3   56.96    0.25
  -2 -11   0   52.21    0.26
  -2  -5   4  238.33    0.59
  -3 -12   2   16.55    0.27
  -1  -4   3  159.50    0.43
  -2  -6   4    0.59    0.16
  -1   5   3 1227.50    0.55
  -1  -7   2    9.98    0.20
  -3 -13   1   71.44    0.41
  -1  -5   3 1222.49    1.15
  -2   0   5    0.03    0.18
  -1  -9   0  144.22    0.36
  -3  -7   5    6.62    0.27
  -2 -12   0   29.30    0.24
  -3 -13   2    0.35    0.18
  -2 -10   3   23.40    0.28
  -1  -9   1  845.34    0.93
  -1  -8   2  142.81    0.44
  -1  -6   3 1079.12    1.14
  -2 -12   1  163.55    0.52
  -3  -8   5   38.12    0.40
  -1  -1   4    7.29    0.21
  -1   0   4    0.01    0.15
  -3 -14   1   43.89    0.37
  -3  -2   6    0.17    0.21
  -3  -1   6    0.75    0.19
  -1  -7   3  471.18    0.81
  -1   1   4    7.46    0.15
  -2 -12   2   29.56    0.29
  -1  -9   2   25.77    0.25
   0  -1   1 1822.76    0.70
  -3 -14   2   10.40    0.27
  -3 -13   3    0.25    0.23
  -1  -4   4  122.93    0.49
  -1   2   4   11.73    0.16
  -1 -10   0  121.17    0.36
   0   0   1   -0.02    0.05
  -1  -5   4 1297.15    1.45
  -2 -10   4    0.10    0.22
   0  -3   0    0.18    0.07
  -1  -6   4   15.30    0.30
  -1   3   4  368.65    0.52
   0  -4   1  170.86    0.35
  -1 -11   1  447.92    0.79
  -1  -7   4    3.05    0.20
   0  -4   0  966.73    0.56
   0  -2   2 6872.30    1.99
   0  -5   1   20.66    0.20
   0  -3   2 8534.32    2.37
   0  -1   2  664.32    0.59
  -2 -14   1    3.55    0.23
  -2 -13   3   10.01    0.29
  -2  -9   5    1.38    0.23
  -1 -11   0   16.23    0.18
  -2  -2   6   11.17    0.27
  -1 -10   3   35.11    0.31
   0  -4   2 4967.74    1.93
  -2 -14   2   20.76    0.32
  -2  -1   6   35.36    0.32
   0   0   2   14.97    0.16
  -2 -10   5    1.58    0.27
   0  -6   1  108.53    0.31
   0  -5   2  430.80    0.62
  -2  -6   6    6.26    0.27
  -1 -12   1   48.44    0.33
  -1  -9   4   26.93    0.31
  -2 -14   3    3.17    0.26
  -2 -11   5    1.94    0.26
   0  -3   3 1192.07    1.06
  -1 -10   4   12.94    0.28
   0  -4   3   53.31    0.28
  -2 -15   2   10.07    0.25
   0  -7   2   82.90    0.34
   0  -5   3    4.06    0.20
  -1  -8   5   26.11    0.33
  -2 -15   3   35.90    0.40
  -1 -13   2   27.62    0.29
   0  -8   2    0.49    0.17
   0  -7   0    0.05    0.10
   0  -7   3  353.64    0.71
  -1 -12   4   68.53    0.50
   0  -9   2    0.83    0.16
   0  -8   3   47.40    0.31
  -1 -10   5   18.43    0.34
   0  -4   4   13.61    0.21
   0  -9   3   96.17    0.42
   0  -8   0    0.91    0.12
   0  -2   4  645.72    0.86
  -1 -14   1   66.34    0.39
  -1  -7   6   25.51    0.40
   0  -1   4  243.66    0.52
  -1  -1   6    3.55    0.20
   0   2   2 6818.82    1.26
  -1 -12   5   17.82    0.45
   0  -9   0    0.35    0.11
   0   0   4   16.46    0.18
   0  -4   5  422.57    0.85
   0  -3   5  167.98    0.53
   0 -12   2    7.37    0.20
   0  -2   5    2.72    0.16
   0   2   3    2.23    0.08
   0  -8   5   40.29    0.35
   0   1   4  245.62    0.45
  -1 -16   2    0.82    0.19
   0  -9   5  163.40    0.65
  -1  -4   7    1.06    0.19
   0   0   5    0.08    0.12
   0  -7   6  577.83    1.24
   0  -6   6   20.68    0.28
   0  -5   6   22.76    0.27
   0 -14   2    8.17    0.21
   0   2   4  622.71    0.64
   0  -6  -1  104.60    0.16
   0  -3   6   50.64    0.34
   0 -10   6   64.91    0.49
   0  -7  -1    4.05    0.06
   0 -14   1    0.22    0.14
   1  -7   3   60.09    0.32
   1  -6   2  573.49    0.76
   1  -5   3  782.31    0.96
   0 -15   3    2.13    0.19
   1  -8   3   31.98    0.26
   1  -7   2  123.69    0.39
   0 -15   2  123.76    0.53
   1  -8   2   72.83    0.33
   0  -8  -1   15.39    0.10
   0  -1   6  147.64    0.50
   1  -9   3   18.52    0.22
   1  -7   4    0.85    0.14
   1  -4   2   35.95    0.21
   1  -9   2    4.84    0.16
   1  -8   4   25.34    0.26
   1  -3   3    7.73    0.16
   0 -16   3  106.71    0.59
   1  -3   2   84.68    0.27
   0 -16   2  413.33    0.98
   0  -9  -1   22.41    0.12
   0  -6   7    6.89    0.24
   1 -11   3   58.89    0.36
   1  -7   1   75.76    0.28
   1  -6   1  109.76    0.31
   1  -2   3  594.49    0.71
   0  -4   7   14.02    0.25
   1 -11   2   35.55    0.26
   1  -8   5   38.03    0.32
   1  -9   5   90.51    0.48
   1  -5   1   75.39    0.25
   1  -9   1   80.42    0.31
   1  -4   5   45.89    0.30
   1  -2   2 6954.11    2.07
   0   3   4  122.67    0.25
   1 -12   4  183.97    0.68
   1 -10   5   95.01    0.51
   1  -4   1  395.18    0.49
   0 -10  -1   90.02    0.21
   1 -13   3   47.10    0.35
   1 -11   5  819.18    1.45
   1 -12   5  568.31    1.26
   1  -7   6  406.09    0.99
   1 -14   3 1151.49    1.60
   1  -9   6  294.46    0.92
   1  -6   6   23.61    0.28
   1  -2   5   78.70    0.34
   1  -3   1  309.47    0.41
   1 -12   1  222.57    0.54
   1 -14   2   72.97    0.39
   1  -4   6    2.39    0.16
   1 -15   3  304.61    0.86
   1  -1   5    9.54    0.18
   1   0   3  611.67    0.64
   1  -3   6    8.24    0.18
   1 -13   1    3.26    0.15
   1  -8   0  255.78    0.42
   1  -7   0  133.84    0.29
   1  -2   6    7.92    0.20
   1  -9   0  149.64    0.34
   1 -14   1  224.14    0.59
   1   0   5   14.29    0.17
   1 -10   0  123.56    0.33
   1  -5   7  109.51    0.55
   1 -16   2    3.15    0.17
   1   0   2    0.04    0.09
   2  -9   3    5.19    0.17
   2  -9   4   18.37    0.25
   2  -8   3    3.09    0.14
   2  -8   4   21.52    0.24
   2  -7   4   10.16    0.19
   1  -4   7    3.56    0.17
   1  -1   6   12.22    0.19
   2 -10   3    2.79    0.16
   2 -10   4   77.90    0.43
   2  -7   3    0.43    0.11
   2  -6   4  214.25    0.60
   1 -11   0   15.72    0.15
   1   1   4   74.12    0.25
   2  -6   3  943.39    1.11
   1   1   3  314.71    0.43
   2 -11   3    6.03    0.18
   2 -11   4   76.68    0.44
   2  -8   5   51.08    0.37
   2  -5   4  125.29    0.46
   2 -10   5   18.96    0.28
   2  -7   5   39.61    0.33
   2  -5   3  112.36    0.39
   2 -12   4    8.44    0.22
   2 -11   5    0.05    0.19
   2  -9   2    0.19    0.12
   2  -8   2   25.66    0.22
   2  -7   2   55.02    0.28
   2  -4   4   10.24    0.17
   2  -6   2 1371.89    1.22
   2  -5   5   49.07    0.33
   2  -4   3   43.61    0.25
   1   1   5    5.01    0.14
   2 -13   3  111.52    0.51
   2 -11   2   24.12    0.26
   2  -4   5  127.40    0.48
   1  -4   0   21.50    0.12
   2 -12   2   24.93    0.24
   2  -7   6  188.69    0.70
   2  -5   2  654.70    0.81
   2 -14   3   50.83    0.38
   2  -6   6  253.78    0.79
   2  -3   3   44.61    0.25
   2 -13   2  188.11    0.60
   2  -5   6    7.89    0.20
   2  -4   2  220.77    0.47
   2  -3   5    0.80    0.13
   2  -2   4  246.90    0.56
   1   2   4  106.38    0.28
   2 -14   2    8.57    0.20
   2 -10   1  626.97    0.87
   2  -9   1   12.07    0.18
   2  -4   6  152.12    0.58
   2  -7   1  110.66    0.35
   2 -11   1  256.71    0.59
   2  -3   2    0.23    0.12
   2  -2   5   13.36    0.19
   2  -6   1  280.64    0.52
   1   2   3  552.28    0.53
   2 -15   2    0.48    0.14
   2 -12   1   72.27    0.35
   2  -3   6  126.19    0.52
   1  -3   0 2519.40    0.94
   2  -1   4   26.74    0.20
   2 -13   1    3.61    0.15
   2  -5   1    7.21    0.14
   2  -1   5   11.07    0.17
   2  -2   6  131.96    0.51
   2 -14   1   14.75    0.20
   3  -9   4   11.30    0.22
   3  -8   4    4.75    0.18
   3 -11   4   52.59    0.40
   2   0   4  699.01    0.88
   3 -10   3    0.19    0.14
   3  -9   3   -0.05    0.14
   3  -8   3    5.47    0.17
   3  -8   5   75.61    0.47
   3  -7   5  201.14    0.73
   3  -6   4   15.55    0.22
   2  -1   6   14.79    0.21
   2   0   5    0.20    0.13
   3  -5   4  223.35    0.67
   2   0   3   -0.14    0.11
   3  -5   5   20.21    0.26
   2 -10   0   66.89    0.29
   2  -9   0 1610.58    1.26
   3  -9   2   26.33    0.25
   3  -8   2   39.82    0.28
   3  -5   3    0.91    0.13
   2  -8   0  958.54    0.95
   3 -11   2   80.43    0.42
   3  -4   4  308.55    0.76
   3 -12   2  133.13    0.55
   3  -4   5   32.67    0.30
   2 -12   0   27.42    0.21
   2  -7   0   31.18    0.19
   3  -4   3  399.06    0.80
   1   2   2 7193.35    1.69
   2   1   4   27.55    0.21
   1  -7  -1   81.95    0.20
   2   1   5   11.11    0.17
   3  -3   5    1.11    0.14
   3  -5   2   55.75    0.31
   3  -4   6    3.70    0.21
   3  -3   3  107.93    0.43
   2   0   2   59.94    0.25
   2   1   3    1.56    0.12
   3  -2   4   31.90    0.27
   2  -5   0  443.26    0.61
   3 -11   1   14.83    0.21
   3 -10   1   11.33    0.18
   3  -9   1    4.60    0.15
   3  -4   2   62.54    0.31
   3  -3   6    8.80    0.22
   3  -2   5   94.06    0.46
   1  -6  -1  373.39    0.39
   3 -12   1   39.31    0.31
   3  -7   1   77.70    0.36
   3  -2   3    4.57    0.15
   1   1   1 3304.12    1.10
   3 -13   1    6.41    0.20
   3  -3   2  703.87    1.01
   2   2   4  263.14    0.55
   3  -6   1    1.23    0.13
   3  -2   6   22.79    0.29
   3  -1   4   87.38    0.41
   2  -4   0  464.98    0.62
   2  -1   1  106.83    0.31
   3  -1   5   68.81    0.40
   3 -14   1   11.49    0.23
   4  -8   4   37.91    0.39
   3  -5   1  105.73    0.41
   4 -10   3    1.36    0.21
   4  -9   3    2.08    0.21
   4  -7   4   26.97    0.34
   4  -8   3   14.87    0.26
   3  -2   2   96.97    0.40
   4  -7   3    7.15    0.25
   1  -1   0 2008.38    0.86
   2   2   3   32.79    0.22
   3  -4   1  344.08    0.71
   3   0   4    0.04    0.15
  -1  -8   1 2152.57    1.04
   0  -9   6  275.73    0.82
   1  -6   4  296.51    0.65
   1  -6   5    1.62    0.13
   1  -3   2   84.22    0.25
   1  -4   7    4.00    0.21
  -1 -11   3   86.34    0.36
  -1 -10   2  304.75    0.52
   1  -6   6   20.41    0.29
   0 -10   4   18.55    0.22
   1  -7   5  298.74    0.75
   1  -6   3   94.36    0.34
   0 -10   6   62.62    0.43
   1  -7   4    0.99    0.15
   1  -4   2   34.36    0.18
  -1 -12   4   57.29    0.34
   1  -7   6  408.45    0.95
   0 -10   3   81.53    0.33
   1  -8   5   37.35    0.31
   2   0   5    0.12    0.13
   0 -11   5  118.98    0.52
   1  -7   3   68.68    0.30
   2   1   4   28.96    0.20
   1  -8   4   23.13    0.24
   1  -8   6  409.19    0.97
   1  -5   2   62.75    0.24
   2   1   6   15.61    0.21
   2   2   4  265.49    0.48
  -1 -12   3    0.57    0.13
   0 -11   4    6.28    0.16
   2  -2   5   13.95    0.19
   2  -1   4   28.39    0.20
   2  -1   6   15.59    0.23
   2   0   6  265.66    0.67
  -1  -9   1  847.90    0.66
   0  -9   2    0.73    0.11
  -1 -11   2  489.50    0.66
   2  -3   5    0.80    0.14
   2  -2   4  266.17    0.55
   2  -2   6  136.84    0.51
   2   3   4  992.60    0.89
   1  -9   5   87.24    0.43
  -1 -13   4  141.89    0.50
   1  -9   6  305.05    0.86
   2  -3   6  134.53    0.52
   0 -12   5  128.39    0.54
   0  -7   1    4.23    0.09
   1  -8   3   30.26    0.22
   1  -6   2  549.24    0.67
   0 -11   3   97.35    0.36
   2  -4   6  154.87    0.57
   2  -1   7    7.63    0.20
   2  -4   4    9.72    0.17
  -1  -6   0  199.21    0.19
   0 -12   4  217.59    0.61
   1   0   1  349.82    0.31
   2  -5   5   51.63    0.33
   2   0   3   -0.21    0.10
   1 -10   5   87.36    0.44
   1  -1   1 3318.16    1.03
   1   1   1 3284.64    0.82
   2  -5   6    8.98    0.22
   0 -10   2   89.79    0.31
   2  -5   4  126.56    0.42
  -1 -13   3   69.55    0.32
   1 -10   4   41.88    0.29
   1  -9   3   21.51    0.20
   1  -7   2  118.74    0.34
   2  -6   5  233.42    0.65
   2   2   3   32.79    0.16
   1  -2   1 1877.62    0.83
   0 -13   5   60.85    0.40
   2  -6   4  216.33    0.56
   0 -12   3   31.62    0.23
   0  -8   1   15.35    0.12
   1 -11   5  799.02    1.28
   1  -3   1  305.34    0.37
   2  -7   5   42.00    0.31
   2  -4   3   45.16    0.24
   0 -13   4   38.58    0.30
   2  -7   6  198.21    0.68
   1   2   1 1880.93    0.52
   1 -10   3   53.41    0.28
   1  -8   2   70.66    0.28
   2  -7   4   10.50    0.18
   2  -5   3  111.65    0.37
   1  -4   1  382.82    0.44
   2  -8   5   54.06    0.35
   0 -11   2   39.94    0.21
   2  -6   3  957.16    1.04
   2  -8   4   20.61    0.22
   2  -9   5  192.07    0.63
   0 -13   3  655.72    0.95
   0  -9   1   21.92    0.16
   1 -12   4  183.27    0.58
   1  -9   2    6.46    0.13
   1  -5   1   73.44    0.22
   0 -14   4   14.50    0.20
   0  -3   0    0.01    0.04
   2  -2   2  323.83    0.47
   2 -10   5   19.09    0.25
   2   0   2   61.77    0.20
   0 -12   2    6.60    0.13
   1  -6   1  114.21    0.27
   2  -4   2  228.43    0.43
  -1 -11   1  397.33    0.49
  -1  -7   0  124.56    0.16
   0  -4   0  875.54    0.43
   1 -12   3    0.63    0.11
   2 -10   4   75.48    0.38
   2  -5   2  678.77    0.76
   2   1   2   26.93    0.13
   3  -3   5    1.10    0.12
   3  -3   6    9.88    0.20
   3  -2   5   91.77    0.39
   3  -2   6   21.62    0.24
   3  -1   5   68.33    0.33
   0 -14   3  388.41    0.75
   2 -11   5    0.08    0.15
   3  -4   5   34.43    0.26
   3  -4   6    4.14    0.17
   3   0   5    0.04    0.11
   0 -10   1   89.75    0.26
   1  -7   1   74.17    0.24
   2  -9   3    5.83    0.14
   2  -6   2 1340.61    1.11
   3  -5   5   20.77    0.22
   3  -3   4   43.15    0.26
   3  -2   4   32.54    0.22
   2 -11   4   72.66    0.40
   3  -6   5   84.63    0.42
   3  -4   4  319.64    0.67
   3  -1   4   85.71    0.33
   0 -13   2   15.47    0.17
   1 -11   2   48.26    0.25
   2   2   2  321.03    0.36
   3   0   4    0.12    0.10
   1 -13   3   43.09    0.28
   2 -10   3    2.36    0.14
   2  -7   2   49.71    0.27
   3  -6   4   14.97    0.20
   3   1   4   86.12    0.30
   2 -12   4    8.65    0.20
   2  -8   2   25.02    0.19
   3  -8   5   77.14    0.43
   0 -11   1   25.30    0.16
   3  -7   4    0.38    0.13
   2 -11   3    6.47    0.15
   0  -6   0    3.28    0.06
   1 -12   2   48.80    0.26
   3  -3   3  109.01    0.36
   1 -14   3 1086.96    1.36
   3  -8   4    4.76    0.16
   3  -2   3    4.46    0.10
   3  -5   3    0.93    0.11
   3  -1   3   64.99    0.26
   0 -14   2    7.70    0.14
   3  -9   4   11.54    0.19
   3  -6   3  265.96    0.61
   2 -10   2  161.17    0.47
   3  -7   3  171.58    0.51
   0 -12   1    2.59    0.09
   0  -7   0    0.21    0.06
   1 -13   2   94.30    0.36
   1 -10   1  102.30    0.31
   3 -10   4   44.38    0.33
   2  -3   1  182.15    0.34
   3  -8   3    5.01    0.15
   2 -13   3  113.70    0.46
   2  -5   1    6.83    0.11
   2  -2   1  267.87    0.39
   2  -6   1  279.04    0.48
   3 -11   4   53.25    0.36
   3  -9   3   -0.16    0.12
   0  -8   0    1.22    0.07
   1 -11   1  461.87    0.67
   2  -1   1  102.83    0.24
   1 -14   2   67.84    0.33
   3 -10   3    0.52    0.12
   3  -5   2   56.56    0.27
   3  -4   2   63.32    0.27
   2 -14   3   53.15    0.34
   3   2   3    4.32    0.11
   0 -13   1   33.37    0.19
   3  -6   2  190.72    0.49
   3  -2   2   94.15    0.30
   4  -4   5    9.08    0.19
   3  -7   2  217.76    0.54
   4  -3   5   18.65    0.22
   1 -12   1  214.56    0.48
   3 -11   3   19.63    0.23
   1  -5   0  539.99    0.50
   2  -9   1   13.69    0.18
   3  -8   2   40.29    0.26
   3  -1   2   47.55    0.22
   4  -5   4   54.03    0.34
   4  -4   4    5.36    0.16
   1 -15   2  135.41    0.47
   2 -13   2  189.68    0.59
   4  -6   4    0.55    0.14
   4  -3   4   10.45    0.18
   3 -12   3   25.82    0.26
   3  -9   2   26.84    0.23
   4  -7   4   26.79    0.27
   2 -10   1  636.23    0.86
   3   0   2   -0.03    0.09
   4  -2   4  105.38    0.41
   1 -13   1    3.23    0.12
   3 -10   2    1.93    0.13
   4  -1   4   52.00    0.29
   1  -2   0 1646.40    0.70
   0 -10   0   51.44    0.18
   2 -14   2    8.86    0.17
   2   1   1  105.22    0.21
   3 -13   3   83.21    0.44
   4  -6   3   34.04    0.28
   4  -5   3  303.81    0.71
   3 -11   2   82.73    0.39
   4  -4   3  253.91    0.63
   1  -9   0  151.87    0.34
   3   1   2   47.56    0.19
   4  -3   3   79.17    0.35
   4  -8   3   14.69    0.21
   1 -14   1  232.12    0.56
   4  -2   3   17.27    0.18
   2 -15   2    0.47    0.12
   3 -12   2  139.39    0.53
   3  -5   1  102.63    0.34
   4  -9   3    1.87    0.15
   0 -11   0    0.13    0.08
   1  -1   0 1942.33    0.70
   3  -7   1   76.48    0.32
   3  -4   1  333.01    0.57
   4 -10   3    1.58    0.15
   4  -1   3   95.76    0.37
   3  -8   1  124.28    0.41
   3  -3   1  568.19    0.72
   2 -13   1    4.08    0.12
   2  -6   0   33.11    0.19
   3  -9   1    5.02    0.14
   1 -11   0   16.68    0.15
   2  -7   0   30.70    0.19
   2  -5   0  437.84    0.57
   3   2   2   98.58    0.25
   1 -15   1   41.20    0.27
   2 -16   2   15.94    0.22
   3 -10   1   11.04    0.17
   4  -7   2    6.73    0.16
   4  -6   2    2.93    0.14
   4   0   3    0.08    0.11
   2  -8   0  981.41    0.97
   4  -8   2   57.99    0.35
   4  -4   2  274.46    0.63
   0 -12   0   22.50    0.14
   2   2   1  280.15    0.31
   3 -14   2   11.93    0.21
   2 -14   1   15.81    0.19
   2  -3   0   10.87    0.12
   3 -11   1   15.61    0.20
   3  -1   1   19.09    0.16
   4  -9   2    3.96    0.15
   4  -3   2   36.99    0.24
   4 -10   2    5.42    0.17
   4  -2   2    0.30    0.11
   4 -11   2   66.08    0.41
   2  -2   0  701.83    0.63
   2 -15   1   -0.10    0.13
   2 -11   0   52.83    0.27
   1   0   0    0.01    0.04
   3   0   1  186.02    0.38
   4  -1   2   68.28    0.30
   3 -13   1    6.58    0.17
   2 -12   0   29.28    0.22
   3   3   2  720.37    0.62
   4  -7   1   12.47    0.19
   4  -6   1   77.98    0.37
   5  -5   3    0.52    0.17
   2  -1   0  615.76    0.57
   3 -14   1   11.07    0.20
   3  -7   0   31.95    0.22
   3  -6   0   76.76    0.31
   4  -8   1    8.49    0.18
   4  -5   1  444.37    0.82
   4   0   2   20.85    0.18
   3  -8   0   55.95    0.29
   3  -5   0  117.19    0.37
   4  -9   1    8.29    0.18
   5  -4   3  128.49    0.53
   1 -14   0    0.16    0.10
   2 -13   0    1.27    0.12
   3  -9   0   39.35    0.26
   4 -10   1    5.69    0.17
   5  -3   3  751.03    1.21
   3 -10   0    0.46    0.11
   3   1   1   19.24    0.13
   4  -3   1    0.56    0.11
   3 -15   1   22.55    0.27
   4 -11   1    6.36    0.19
   3 -11   0  226.89    0.63
   3  -3   0  551.50    0.73
   2 -14   0    2.87    0.14
   4 -12   1   13.37    0.22
   5  -7   2   24.47    0.28
   4  -2   1  460.66    0.77
   4   1   2   68.15    0.28
   3 -12   0   25.60    0.25
   5  -5   2  120.62    0.53
   2   0   0  142.48    0.28
   2   3   1  190.33    0.24
   1  -8  -1 2169.48    1.25
   1  -7  -1   82.96    0.25
   3  -2   0    1.76    0.12
   5  -4   2   11.60    0.21
   3 -13   0    0.37    0.14
   1  -9  -1  824.96    0.81
   2 -15   0   88.00    0.43
   4  -1   1  108.64    0.37
   5  -3   2   79.63    0.42
   1 -10  -1   11.22    0.13
   1  -5  -1   32.08    0.16
   2  -8  -1  536.81    0.76
   2  -7  -1  127.00    0.37
   2  -6  -1  297.64    0.53
   3   2   1  743.32    0.69
   4  -8   0   27.09    0.26
   4  -7   0  623.16    1.06
   4  -9   0    0.04    0.13
   4  -6   0   55.22    0.33
   5  -2   2   10.77    0.20
   1 -11  -1  467.70    0.68
   2  -5  -1   45.98    0.22
   4 -10   0   82.40    0.44
   4  -5   0   22.23    0.22
   4   0   1   -0.08    0.11
   5  -8   1    2.34    0.18
   1  -4  -1  334.70    0.42
   4 -11   0  586.66    1.18
   5  -6   1  769.56    1.34
   0  -8  -1   14.92    0.10
   0  -7  -1    4.20    0.07
   2  -4  -1   87.71    0.28
   3 -15   0   45.49    0.35
   5  -5   1  634.16    1.18
   0  -9  -1   22.19    0.12
   1   1   0 2016.79    0.64
   4 -12   0  298.47    0.88
   5  -1   2    1.16    0.15
   2 -12  -1  164.12    0.50
   3  -8  -1    6.38    0.14
   0  -6  -1   99.98    0.19
   0 -10  -1   94.58    0.24
   3 -10  -1    0.08    0.13
   3  -6  -1    1.41    0.11
   2  -3  -1  151.35    0.36
   1 -13  -1    3.83    0.11
   2 -13  -1    0.85    0.12
   3  -5  -1    1.82    0.12
   4  -2   0   54.68    0.29
   4   1   1  107.87    0.37
   0 -11  -1   25.68    0.14
   3 -12  -1   -0.05    0.12
   3  -4  -1   36.93    0.24
   5  -2   1   52.63    0.35
   0  -5  -1   20.42    0.10
   2 -14  -1    3.26    0.16
   3 -13  -1   71.50    0.41
   3   3   1  589.66    0.61
   2  -2  -1   19.18    0.16
   5  -8   0   80.59    0.49
   5  -7   0    5.86    0.21
   3  -3  -1  182.00    0.48
   4  -1   0   68.79    0.32
   3   1   0  328.16    0.53
   4  -9  -1  315.83    0.86
   4  -8  -1  305.80    0.83
   4  -7  -1  319.13    0.82
   3 -14  -1   44.87    0.35
   4 -10  -1  103.83    0.53
   4  -6  -1   94.05    0.45
   5  -5   0    1.87    0.16
   5  -1   1   12.75    0.20
   4 -11  -1   43.77    0.37
   1  -2  -1  472.61    0.48
   5  -4   0   21.19    0.27
   3 -15  -1   10.62    0.22
   4  -4  -1    2.65    0.14
   4   0   0   15.92    0.18
   5  -3   0   24.07    0.27
   5   0   1    0.55    0.15
   2   2   0  722.74    0.59
   2  -9  -2   17.29    0.19
   2 -10  -2  143.99    0.48
   2  -7  -2 1160.50    1.23
   5  -2   0    1.59    0.15
   2 -11  -2  427.75    0.85
   3  -9  -2   20.22    0.24
   2  -6  -2   12.17    0.17
   3  -7  -2    3.28    0.14
   5  -8  -1  638.77    1.42
   4   1   0   67.58    0.33
   5  -7  -1    1.42    0.20
   2 -12  -2   29.31    0.26
   3  -6  -2   49.80    0.32
   5  -6  -1    1.20    0.18
   1  -9  -2   25.82    0.20
   2  -5  -2    5.29    0.15
   3 -12  -2   17.35    0.25
   5  -1   0   21.84    0.27
   1 -10  -2  289.54    0.59
   1  -8  -2  142.68    0.40
   1  -1  -1 1522.69    0.88
   3  -5  -2    8.35    0.17
   1  -7  -2   12.10    0.17
   2 -13  -2  251.91    0.72
   2   0  -1    0.03    0.13
   2   4   1  638.45    0.39
   3 -13  -2    0.01    0.17
   1 -11  -2  474.34    0.78
   4  -9  -2 1355.90    1.93
   4  -8  -2 1367.21    1.89
   2  -4  -2   17.77    0.20
   4  -7  -2    3.33    0.19
   3  -4  -2   84.45    0.39
   3   4   1  349.57    0.46
   2 -14  -2   19.02    0.26
   3 -14  -2    9.68    0.22
   4 -12  -2    0.98    0.19
   4  -6  -2   28.69    0.31
   5  -3  -1    3.64    0.17
   5   0   0    0.17    0.14
   4  -5  -2  100.89    0.51
   3  -3  -2   22.79    0.23
   4   2   0   53.69    0.30
   0  -3  -1 1402.39    0.64
   2  -3  -2   99.87    0.37
   4  -4  -2    4.85    0.18
   4   0  -1   -0.01    0.11
   5  -2  -1    5.47    0.20
   3   1  -1   15.26    0.19
   0   2  -7   79.98    0.46
   1  -4  -5  248.34    0.57
   1  -1  -7   15.01    0.23
   2  -4  -6   23.94    0.23
   3  -6  -4  142.12    0.41
   0  -2  -5    2.89    0.10
   1  -3  -6  100.78    0.41
   3  -6  -2   48.22    0.17
   0  -1  -6  155.27    0.50
   0   1  -7  180.13    0.62
   2  -5  -1   45.49    0.12
  -1   0  -4    0.00    0.08
  -1   3  -6    5.23    0.21
   1  -2  -7  124.86    0.54
   0  -3  -5  162.33    0.43
   0  -3  -2 8651.12    1.83
   2  -6  -5   53.45    0.29
   0  -2  -6   38.69    0.26
   0   0  -7   -0.02    0.11
   1  -5  -5   76.53    0.44
  -1   2  -6   10.82    0.20
  -1   0  -5   13.30    0.14
   3  -7  -4  364.48    0.62
   0  -4  -4   12.34    0.13
   0  -4  -3   51.57    0.19
   3  -7  -3  273.54    0.45
  -1   1  -6   11.20    0.15
  -1  -1  -3  300.79    0.40
   0  -3  -6   46.27    0.27
   1  -6  -4    9.67    0.27
   1  -5  -6  102.46    0.42
   2  -7  -4    4.89    0.10
   2  -6  -6    4.00    0.15
   3  -7  -5    4.90    0.14
   0  -4  -5  384.49    0.65
   2  -7  -3   24.67    0.14
   1  -4  -7    0.65    0.12
   2  -7  -5   16.02    0.17
  -1   0  -6    0.08    0.08
  -1   2  -7   76.95    0.38
  -1  -2  -4  101.14    0.28
   0  -5  -4 1460.55    1.09
   0  -4  -6  111.57    0.42
   0  -4  -2 4973.64    1.40
   0  -5  -5   14.29    0.15
   0  -3  -7    9.37    0.17
   3  -8  -4   88.81    0.31
  -1  -2  -3  519.74    0.52
  -1   1  -7   14.24    0.19
   0  -5  -3    4.21    0.09
   1  -6  -2  578.09    0.55
   2  -8  -4    9.23    0.13
   2  -7  -2 1089.32    0.71
  -1  -1  -2 2619.21    0.90
  -1   0  -7  113.89    0.47
   0  -5  -6   21.52    0.20
  -1  -3  -5  173.85    0.45
   0  -4  -7   12.89    0.20
   2  -8  -3    0.01    0.08
   0  -6  -4 1451.87    1.11
   1  -5  -1   36.66    0.11
   0  -6  -5   31.09    0.20
  -2   3  -4  889.91    0.70
   0  -6  -3   47.32    0.19
   0  -6  -6   19.18    0.20
   0  -5  -2  425.73    0.43
  -2   2  -4  244.35    0.37
   2  -9  -5    0.90    0.11
  -2   4  -3   45.01    0.12
   2  -9  -4  100.99    0.33
  -2   1  -5   10.67    0.14
   0  -7  -5   65.13    0.30
   1  -8  -3   58.44    0.23
  -2   1  -4   25.55    0.14
  -2   3  -3   45.29    0.13
  -1  -4  -3 1615.94    0.98
   0  -7  -6  539.41    0.93
   2  -9  -3   28.74    0.17
   2  -8  -2   66.45    0.19
  -2   0  -5    0.21    0.09
  -1  -5  -5  333.81    0.62
  -2   0  -4  722.18    0.69
  -2   1  -6   15.03    0.16
  -2   2  -3   30.89    0.12
  -1  -5  -4 2098.85    1.38
   1  -9  -4   22.51    0.17
   0  -7  -3  351.79    0.51
  -1  -4  -7    3.58    0.14
   2 -10  -5    1.51    0.12
  -2  -1  -5   10.85    0.13
  -2   0  -6  231.29    0.55
   0  -8  -5   36.38    0.24
   0  -6  -2  195.49    0.32
   0  -8  -4  349.08    0.60
  -2  -1  -4   27.55    0.16
  -2   1  -3    1.54    0.07
   0  -8  -6  130.12    0.50
  -2  -1  -6   14.44    0.17
  -1  -5  -3  820.42    0.78
   1  -9  -3  168.02    0.37
  -1  -6  -4  295.49    0.53
  -1   0  -1  352.10    0.24
   1 -10  -5   15.95    0.24
   1  -8  -2  149.51    0.31
   2  -7  -1  128.66    0.20
  -2  -2  -6  123.44    0.45
  -2  -2  -4  251.39    0.45
   0  -8  -3   47.66    0.21
   1 -10  -4   12.81    0.17
   0  -9  -5  153.81    0.48
   2 -10  -3   22.85    0.16
  -1  -7  -5  286.43    0.63
   0  -9  -6  259.49    0.73
   2 -11  -5    1.55    0.11
   0  -9  -4  264.99    0.54
  -2  -3  -6  126.84    0.44
   0  -7  -2   84.62    0.23
  -1  -7  -4    0.72    0.10
   2 -11  -4  117.52    0.39
  -2  -3  -4  949.57    0.89
  -2  -2  -7    2.08    0.12
  -2  -4  -5  125.80    0.40
   0 -10  -5   84.23    0.38
   1 -10  -3   30.65    0.19
  -2  -4  -6  151.06    0.48
  -2  -2  -3   31.16    0.16
  -1  -8  -5   36.32    0.26
  -1  -1  -1 3228.13    0.82
   0 -10  -6   63.80    0.37
  -1  -8  -6  357.37    0.83
   0  -9  -3   92.66    0.30
  -1  -5  -2   64.97    0.20
   1  -9  -2   26.01    0.14
   1  -7  -1   85.38    0.20
  -2  -5  -6    7.99    0.17
   2 -11  -3    0.02    0.08
  -2  -3  -3   45.02    0.20
  -1  -9  -5   81.66    0.37
   1 -12  -5   30.33    0.48
  -2  -6  -6  258.69    0.68
  -1  -2  -1 1896.86    0.71
   1 -11  -3   87.83    0.32
   2 -10  -2  144.70    0.31
   1 -12  -4   67.39    0.37
   2  -8  -1  531.73    0.42
  -2   1  -2   27.90    0.10
  -2  -6  -4  216.37    0.48
  -2  -7  -6  179.30    0.58
  -1 -10  -5   86.50    0.39
   1 -10  -2  300.36    0.45
  -2   3  -2    0.40    0.04
  -1  -3  -1  310.30    0.32
  -2  -1  -2   27.77    0.12
  -1 -10  -4   39.07    0.25
   1  -8  -1 2191.96    0.95
  -1  -7  -2  116.31    0.28
   0 -12  -4  228.53    0.57
   1  -4   0   22.41    0.06
  -2  -8  -5   50.62    0.30
  -2  -2  -2  328.06    0.39
   1 -12  -3    0.33    0.09
  -2  -6  -3  966.85    0.89
   1 -13  -4  138.52    0.45
  -3  -2  -5   94.85    0.32
  -2  -8  -4   19.48    0.18
  -3  -3  -5    1.18    0.11
  -1 -10  -3   55.15    0.25
   1 -11  -2  461.60    0.58
  -3   0  -4    0.19    0.08
  -3  -4  -6    3.35    0.12
  -3  -1  -4   83.07    0.26
  -3  -4  -5   32.56    0.21
  -3  -2  -4   30.93    0.18
  -2  -4  -2  225.55    0.36
   0 -13  -4   38.54    0.26
   1  -9  -1  789.25    0.58
  -3  -5  -6    2.72    0.12
  -3  -3  -4   40.01    0.21
  -3  -5  -5   19.89    0.19
  -2  -8  -3    3.24    0.10
  -2  -5  -2  656.01    0.62
  -1 -11  -3   58.66    0.27
  -1  -9  -2    8.88    0.11
   0 -11  -2   40.77    0.19
  -1  -6  -1  114.09    0.23
   0 -13  -3  589.39    0.82
  -2 -11  -5    0.45    0.11
   0  -2   0  442.95    0.20
   0  -9  -1   21.86    0.13
  -1 -12  -3    0.63    0.09
  -1  -7  -1   71.70    0.19
   0 -12  -2    6.61    0.09
   0  -3   0    0.05    0.03
  -3  -7  -4    0.18    0.08
  -3  -5  -3    0.83    0.07
  -1   0   0    0.04    0.03
   0  -7  -3  350.07    0.41
  -2  -5  -2  671.72    0.66
  -3  -6  -4   15.14    0.19
   0  -8  -4  362.41    0.49
  -4   0  -2   20.78    0.16
   1  -5  -2    2.74    0.05
  -2  -3  -1  187.15    0.31
  -1  -6  -2  597.70    0.57
  -4  -4  -4    4.99    0.14
  -4  -3  -3   77.85    0.34
  -2   1   0  630.85    0.41
   0  -6  -2  195.23    0.27
  -4  -1  -2   66.57    0.27
  -3  -4  -2   63.82    0.25
  -2  -7  -3    0.46    0.09
  -2  -8  -4   20.86    0.18
  -5   2  -3  334.37    0.69
  -1  -9  -5   83.31    0.33
  -3  -7  -4    0.39    0.11
  -3  -6  -3  272.81    0.56
  -4  -5  -4   53.35    0.31
  -2  -6  -2 1400.89    1.01
  -5   1  -3   24.82    0.22
  -4  -4  -3  258.36    0.59
  -4   3  -1    0.48    0.08
  -4  -2  -2    0.28    0.09
  -2  -4  -1  622.30    0.58
  -1  -9  -4    1.31    0.12
  -5   0  -3  208.82    0.57
   0  -8  -3   46.89    0.17
  -4  -5  -3  310.27    0.66
  -4   1  -1  108.78    0.30
  -3  -8  -4    5.05    0.14
  -3  -7  -3  181.90    0.47
  -2  -9  -4   18.93    0.18
  -1  -1   0 1991.92    0.61
   0  -9  -4  261.70    0.43
  -5  -1  -3   24.93    0.22
  -3   4   0   -0.01    0.05
  -1  -5  -1   74.32    0.19
  -1 -10  -5   88.25    0.34
  -4   0  -1   -0.05    0.08
  -2  -5  -1    6.92    0.11
  -4  -7  -4   26.94    0.25
  -4  -6  -3   33.91    0.25
  -4  -4  -2  280.68    0.57
  -3   2   0    1.77    0.07
  -2  -1   0  642.07    0.47
  -1  -9  -3   28.70    0.20
   0  -7  -2   83.90    0.19
  -5   1  -2    1.02    0.12
  -3  -8  -3    5.31    0.13
  -4  -1  -1  108.60    0.31
  -3  -9  -4   11.85    0.17
  -3  -4  -1  344.83    0.52
  -1 -10  -4   40.48    0.22
  -5   0  -2   -0.14    0.11
  -2 -10  -4   79.35    0.33
  -3   1   0  333.86    0.38
  -4  -5  -2    0.25    0.11
  -4  -8  -4   38.53    0.28
  -3  -7  -2  223.06    0.48
  -2  -8  -2   26.22    0.17
  -5  -4  -3  126.61    0.47
  -4  -7  -3    6.69    0.15
  -3   0   0   -0.01    0.08
  -2  -6  -1  297.72    0.44
  -2  -2   0  723.94    0.53
  -1  -2   0 1691.31    0.62
   0  -9  -3   91.74    0.23
  -3  -5  -1  106.44    0.30
  -5  -2  -2   11.08    0.15
  -4  -6  -2    3.41    0.12
  -4  -3  -1    0.57    0.09
  -5  -5  -3    0.23    0.12
  -2 -10  -3    2.33    0.11
  -4  -8  -3   14.17    0.18
  -3  -8  -2   40.09    0.23
  -3  -1   0  321.08    0.41
  -2 -11  -4   73.89    0.32
  -5  -3  -2   80.09    0.34
  -2  -3   0   11.15    0.10
  -4  -7  -2    6.49    0.14
  -3 -10  -3    0.29    0.11
  -3  -2   0    1.78    0.10
  -2  -7  -1  113.36    0.29
  -1  -9  -2    8.85    0.10
   0  -8  -2    0.38    0.06
  -3 -11  -4   52.14    0.31
   1  -6  -2  501.39    0.29
  -1  -3   0 2493.10    0.81
  -4  -9  -3    1.73    0.13
  -3  -9  -2   26.37    0.19
  -2 -11  -3    6.07    0.12
  -5  -5  -2  121.88    0.43
  -5   0  -1    0.64    0.10
  -3  -7  -1   77.95    0.27
  -2  -4   0  453.25    0.46
  -4  -8  -2   58.26    0.30
  -2 -12  -4    8.80    0.15
   0 -10  -3   85.14    0.23
  -5  -1  -1   12.32    0.15
   0  -6  -1  105.34    0.17
  -4   1   0   67.99    0.21
  -4   2   0   54.67    0.18
  -2  -8  -1   74.05    0.24
  -5  -2  -1   50.90    0.25
  -4 -10  -3    1.25    0.12
  -4  -6  -1   78.07    0.30
  -4   0   0   15.77    0.12
  -4  -1   0   66.62    0.23
  -3 -10  -2    1.63    0.10
  -1  -4   0   21.91    0.11
  -5  -3  -1    1.26    0.11
  -3  -8  -1  121.72    0.34
  -2  -5   0  430.88    0.47
  -4  -2   0   53.64    0.21
  -4  -7  -1   12.30    0.15
  -5  -4  -1   19.91    0.17
  -3  -5   0  115.03    0.29
  -2 -11  -2   25.25    0.20
  -4  -3   0    3.61    0.09
  -1 -12  -3    0.64    0.08
  -4 -10  -2    5.41    0.14
  -3 -11  -2   79.39    0.33
  -3  -9  -1    4.82    0.11
  -1  -5   0  529.19    0.42
  -4  -4   0    7.37    0.11
   0  -7  -1    4.37    0.06
  -4  -5   0   21.28    0.16
  -4 -11  -2   64.39    0.33
  -3 -10  -1   11.08    0.14
  -2 -12  -2   23.81    0.18
  -4  -9  -1    7.77    0.14
  -3  -7   0   31.12    0.17
   0 -10  -2   90.63    0.21
  -5  -1   0   21.02    0.16
  -5  -2   0    1.74    0.11
  -4 -10  -1    5.55    0.13
  -3  -8   0   54.43    0.23
  -1 -12  -2   46.94    0.20
  -1 -10  -1   98.78    0.25
  -5  -3   0   23.04    0.17
  -3 -13  -2  198.40    0.52
  -5  -4   0   20.53    0.17
  -3  -1   1   15.43    0.11
   0  -2   0  457.41    0.20
  -5  -5   0    1.72    0.11
  -3  -9   0   36.58    0.20
  -3  -2   1   78.36    0.21
  -2  -9   0 1571.15    1.05
  -3 -12  -1   38.93    0.23
  -3  -3   1  175.07    0.31
  -3   1   1   15.47    0.09
  -2   0   1   -0.10    0.04
   0 -11  -2   42.22    0.16
  -3 -14  -2   11.68    0.17
  -2  -3   1  143.19    0.24
  -4  -9   0    0.13    0.10
  -2 -14  -2    8.49    0.15
  -1 -13  -2   91.11    0.28
  -5  -7   0    5.53    0.15
  -4 -12  -1   12.46    0.18
  -3 -10   0    0.32    0.09
  -2  -4   1   86.26    0.21
  -4  -2   1  107.61    0.28
  -4  -1   1   32.07    0.16
  -4  -3   1   31.72    0.17
  -4   0   1    0.05    0.07
  -3   2   1   78.69    0.15
  -2 -10   0   64.76    0.25
  -2   1   1  641.60    0.35
  -4  -4   1    2.50    0.09
  -3 -13  -1    6.43    0.14
  -2  -5   1   44.62    0.17
  -4 -10   0   79.93    0.34
  -3  -6   1    1.36    0.09
   0  -4   0  962.77    0.41
  -4  -5   1    0.50    0.08
  -3 -11   0  218.68    0.50
  -2 -13  -1    3.70    0.11
  -1 -12  -1  219.15    0.41
  -3  -7   1   34.02    0.18
  -5  -9   0    3.06    0.14
  -4  -6   1   92.11    0.31
  -2 -15  -2    0.75    0.12
  -2 -11   0   54.23    0.24
  -1 -14  -2   69.23    0.27
  -4 -11   0  581.90    0.91
   0  -5   0   -0.09    0.06
   0 -10  -1  101.30    0.22
  -3 -12   0   26.59    0.21
  -3  -8   1    6.17    0.11
  -2 -14  -1   15.92    0.18
  -2   2   1   18.41    0.06
  -5  -4   1   51.88    0.26
  -5  -3   1    3.46    0.11
  -4 -12   0  289.54    0.69
  -3   3   1  178.63    0.20
  -5  -5   1   80.50    0.33
  -3  -9   1  140.58    0.39
  -4  -9   1  311.59    0.65
  -2 -16  -2   16.06    0.19
  -1  -4   1  324.61    0.35
  -1  -3   1   46.22    0.15
  -1  -2   1  465.55    0.35
  -5  -7   1    1.58    0.13
  -3 -10   1    0.09    0.11
  -1  -5   1   35.92    0.14
  -2 -15  -1   -0.01    0.11
   0  -7   0    0.12    0.06
  -4 -10   1  105.95    0.41
  -2 -13   0    0.88    0.11
  -1  -6   1  370.84    0.43
  -5  -8   1  633.22    1.05
  -3 -14   0    1.99    0.15
  -2 -10   1   75.17    0.29
  -1  -1   1 1579.72    0.59
  -4  10  -7   22.88    0.26
  -3   0  -3   44.14    0.23
  -1   0  -6   -0.01    0.11
  -4   9  -7    0.92    0.11
   0   4  -8   22.73    0.26
  -4   5  -6    3.20    0.14
  -3   0  -4    0.12    0.09
  -3   2  -6   21.25    0.25
  -3   4  -7    0.60    0.12
  -1  -2  -4   90.72    0.29
  -4   8  -7   16.22    0.23
  -3   8  -8    0.02    0.10
  -2   2  -7    2.13    0.14
   1   2  -7  150.45    0.49
  -2  -1  -5   10.78    0.16
  -1   1  -7   16.30    0.23
  -3   7  -8    0.41    0.10
  -2   0  -6  233.98    0.63
   0   8  -9    0.85    0.10
  -4   7  -7    0.19    0.11
   1  -1  -5   81.92    0.28
   1   0  -6    0.19    0.10
  -3   3  -7    0.16    0.12
  -1  -1  -6   11.08    0.17
   0   3  -8   20.63    0.23
  -3   1  -6  220.17    0.67
  -3   6  -8   12.23    0.22
  -1   7  -9   65.34    0.42
   0   7  -9    7.16    0.16
  -4   6  -7    1.60    0.13
  -2   1  -7    7.63    0.18
   0  -2  -5    2.63    0.10
  -3  -1  -3   61.05    0.26
  -4   3  -6    8.87    0.19
  -3  -1  -4   79.02    0.32
  -1   6  -9   75.41    0.44
   0   6  -9   16.91    0.23
   1   1  -7   17.26    0.21
  -3   2  -7   -0.12    0.12
  -2  -1  -6   14.18    0.21
   0   0  -7    0.16    0.11
   0   2  -8   21.44    0.25
  -2  -2  -5   11.31    0.18
  -3   0  -6   -0.24    0.17
  -1   5  -9   78.35    0.46
  -2   0  -7    0.09    0.12
  -2   6  -9   67.40    0.45
   0   5  -9   31.54    0.30
  -3   4  -8   15.29    0.23
  -2   2  -8   10.90    0.21
  -1  -2  -6    5.63    0.22
   1  -1  -6    3.78    0.13
  -2   5  -9    8.03    0.18
  -1   4  -9   69.72    0.44
   1  -2  -5  300.12    0.53
  -2  -3  -4  893.86    0.97
   0   1  -8   76.38    0.40
   1   0  -7  367.66    0.75
  -4   0  -4   12.55    0.17
  -3  -2  -4   31.03    0.21
  -3   3  -8   49.61    0.38
  -2  -2  -6  130.04    0.48
   0  -3  -5  172.09    0.42
   0   4  -9   24.00    0.26
  -4   0  -3    0.07    0.10
  -4   3  -7   41.30    0.34
  -3  -2  -3    4.48    0.11
  -3  -1  -6  243.66    0.68
  -2   1  -8    0.47    0.12
  -2   4  -9   12.29    0.22
  -4   0  -5    0.06    0.11
  -4   1  -6    7.73    0.18
  -3  -2  -5   94.05    0.39
  -1   3  -9   25.76    0.28
  -3   0  -7    1.46    0.13
  -3   2  -8   14.87    0.22
   0   3  -9    6.15    0.16
   0   0  -8   62.66    0.37
  -1  -4  -4 1649.79    1.22
   1  -2  -6   96.34    0.34
  -2   0  -8    6.60    0.18
  -1   2  -9   19.20    0.28
  -5   4  -6    0.32    0.12
  -4  -1  -4   51.59    0.29
  -3  -2  -6   22.95    0.25
  -2  -3  -6  128.62    0.48
  -2  -2  -7    1.32    0.15
   1  -1  -7   16.77    0.20
  -4   0  -6  186.22    0.64
  -4   4  -8    0.55    0.09
   0   2  -9   60.14    0.39
  -4  -1  -5  141.35    0.51
  -3  -3  -4   42.67    0.24
  -2   2  -9    2.45    0.13
  -4  -1  -3   94.81    0.33
  -4   1  -7   13.26    0.22
  -3  -3  -5    1.28    0.12
  -2  -4  -5  130.32    0.43
   1  -3  -5  153.31    0.44
  -3  -3  -3  109.41    0.33
  -2  -4  -3   44.45    0.21
  -2  -1  -8    0.63    0.13
  -1   1  -9   65.25    0.44
   0  -1  -8   75.03    0.39
  -5   3  -6   23.11    0.27
  -1  -3  -7   17.25    0.22
  -3   0  -8   -0.15    0.11
  -4  -1  -6    8.37    0.18
  -2  -3  -7    7.57    0.18
  -2   1  -9    3.45    0.14
   0   1  -9   19.84    0.24
  -3  -3  -6    9.53    0.19
  -3  -2  -7   -0.03    0.11
  -2  -4  -6  148.64    0.51
  -4  -2  -5   12.85    0.20
  -4  -2  -4  104.11    0.39
  -4   0  -7    0.18    0.11
  -1  -5  -4 2117.86    1.52
   1  -3  -6  104.19    0.34
   1  -2  -7  142.38    0.48
  -5   2  -6    0.09    0.11
  -1  -5  -5  359.67    0.66
  -1   0  -9   63.71    0.40
  -3  -4  -5   34.57    0.26
  -3  -4  -4  312.63    0.62
   0  -2  -8   22.22    0.24
  -4  -2  -3   17.24    0.16
  -3  -1  -8   11.16    0.19
  -2  -5  -4  121.79    0.38
  -2   0  -9    0.10    0.09
  -1  -4  -7    4.08    0.18
  -4  -2  -6   13.06    0.21
   0   0  -9    0.02    0.09
  -4  -1  -7   13.45    0.22
  -4   1  -8    4.94    0.14
  -2  -4  -7    9.21    0.20
  -5   1  -6   33.78    0.29
  -3  -4  -6    4.42    0.17
  -3  -4  -3  406.69    0.65
  -3  -3  -7   -0.15    0.10
   1  -4  -5  260.00    0.48
  -5   0  -5  711.44    1.15
  -2  -5  -6    7.98    0.19
  -2  -5  -3  117.82    0.33
  -1  -1  -9   65.49    0.42
  -4  -3  -5   18.38    0.21
  -4  -3  -4    9.80    0.15
  -2  -3  -8   15.12    0.22
   0  -5  -6   25.00    0.21
   1  -3  -7   12.06    0.19
  -2  -1  -9    3.46    0.13
   0  -3  -8   21.38    0.23
   0  -1  -9   20.24    0.22
   1  -4  -6   24.33    0.18
  -5   0  -6    0.07    0.12
  -4  -3  -6    9.97    0.20
  -4  -2  -7    8.71    0.19
  -3  -4  -7    0.83    0.11
  -2  -6  -5  224.96    0.57
  -4  -3  -3   79.83    0.30
  -2  -6  -4  216.12    0.50
  -2  -5  -7    0.44    0.12
  -1  -2  -9   16.88    0.26
  -5  -1  -5    0.57    0.13
  -3  -5  -6    2.20    0.15
  -2  -2  -9    2.61    0.12
  -4  -4  -5    9.14    0.18
  -3  -3  -8   55.37    0.38
  -2  -6  -6  276.11    0.68
  -2  -4  -8   24.82    0.27
  -3  -5  -3    1.05    0.09
   0  -2  -9   58.74    0.36
  -5  -1  -6   36.25    0.28
  -4  -3  -7   45.67    0.33
  -1  -6  -3  183.13    0.46
   0  -4  -8   23.39    0.23
   1  -4  -7    0.83    0.11
  -4  -4  -6    9.28    0.18
  -2  -6  -3  976.78    0.93
  -3  -6  -5   87.68    0.38
  -3  -5  -7   23.18    0.26
  -1  -3  -9   26.18    0.26
  -2  -3  -9    2.53    0.12
  -1  -7  -5  311.50    0.63
  -1  -5  -8   12.30    0.20
   1  -5  -6  115.72    0.37
  -5  -2  -5  229.54    0.63
  -3  -6  -6    4.79    0.16
  -3  -4  -8   18.11    0.22
  -2  -7  -5   38.73    0.27
  -2  -5  -8    4.46    0.17
  -1  -7  -6  403.86    0.77
  -1  -7  -4    1.10    0.10
  -5  -2  -6    0.02    0.11
  -4  -5  -5    3.36    0.13
  -2  -7  -6  191.21    0.58
  -2  -7  -4   10.07    0.14
  -4  -4  -7   19.51    0.22
   0  -6  -7    7.84    0.15
  -4  -5  -6    3.88    0.14
  -4  -5  -4   53.49    0.28
   0  -5  -8   21.17    0.21
  -3  -6  -7    2.84    0.13
  -2  -4  -9   12.93    0.20
  -5  -3  -5   40.51    0.29
  -3  -7  -5  217.12    0.58
  -3  -5  -8   64.95    0.40
  -2  -6  -8   23.47    0.26
  -1  -7  -3  111.61    0.33
  -1  -6  -8   12.86    0.19
   1  -6  -5   30.12    0.18
  -5  -3  -6   25.49    0.25
  -3  -7  -6   61.17    0.34
  -2  -7  -3    0.71    0.09
  -1  -8  -5   37.33    0.24
  -4  -5  -7    7.36    0.16
  -2  -8  -5   51.04    0.30
   0  -4  -9   23.93    0.24
   1  -6  -6   73.27    0.30
  -4  -6  -5    3.99    0.13
  -4  -5  -3  308.07    0.58
  -2  -8  -6  136.99    0.49
  -1  -8  -6  397.67    0.77
  -4  -6  -6    7.94    0.18
  -2  -8  -4   21.00    0.18
  -1  -5  -9   77.09    0.41
   0  -7  -7  135.94    0.46
   0  -6  -8   -0.10    0.11
  -3  -7  -7   18.43    0.24
  -2  -5  -9    8.90    0.17
  -5  -4  -5   72.58    0.37
  -3  -6  -8   12.81    0.20
  -3  -8  -5   82.05    0.38
  -3  -7  -3  179.32    0.44
   0  -8  -5   40.66    0.22
   1  -6  -7   52.87    0.29
  -5  -4  -6    0.51    0.12
  -3  -8  -6    1.04    0.13
  -4  -6  -7    1.80    0.11
  -2  -9  -5  187.39    0.53
  -1  -9  -5   85.97    0.35
  -4  -7  -6    2.34    0.14
  -2  -8  -3    3.22    0.10
  -2  -6  -9   67.53    0.41
  -1  -9  -6  299.20    0.69
  -4  -6  -3   33.42    0.21
   0  -8  -7    3.20    0.13
   0  -7  -8    6.64    0.14
  -5  -5  -5    5.57    0.16
  -3  -7  -8    0.30    0.09
  -2  -9  -4   17.80    0.19
  -2  -7  -2   53.59    0.22
  -5  -5  -6   -0.09    0.09
  -3  -9  -5   24.51    0.24
  -2  -9  -7    2.05    0.12
  -1  -8  -8   43.92    0.30
   1  -7  -4    2.85    0.08
  -4  -7  -7   -0.08    0.11
  -4  -5  -2    0.14    0.08
  -3  -8  -3    5.36    0.11
   0  -9  -5  158.57    0.43
  -4  -8  -5   55.42    0.32
  -1  -7  -9   65.97    0.36
  -4  -8  -6   86.84    0.42
  -2 -10  -6  123.79    0.47
  -2 -10  -5   18.63    0.20
  -1 -10  -5   90.80    0.36
  -4  -7  -3    6.54    0.13
  -3  -8  -8    0.38    0.08
  -3  -7  -2  222.62    0.43
  -2  -9  -3    5.53    0.11
  -1 -10  -6   75.28    0.36
   0  -8  -8   17.29    0.19
  -5  -6  -6    9.37    0.16
  -4  -8  -4   37.22    0.25
   1  -8  -5   20.79    0.18
  -2 -10  -4   77.69    0.33
  -2  -9  -8  164.11    0.60
  -1  -9  -8    0.38    0.10
  -4  -8  -7   16.51    0.19
  -2  -8  -2   25.16    0.16
  -1 -10  -4   39.59    0.23
  -3 -10  -5    2.21    0.14
  -4  -6  -2    3.36    0.09
  -3  -9  -3    0.02    0.09
   0 -10  -5   82.94    0.32
   1  -8  -4   84.15    0.26
  -5  -7  -5   34.89    0.26
  -3  -9  -8   23.99    0.23
  -2 -11  -5    0.19    0.13
  -5  -7  -6    1.36    0.10
  -4  -8  -3   14.81    0.16
  -1 -11  -6   53.42    0.30
  -1 -11  -5  776.67    1.02
   0  -9  -8  176.12    0.53
  -4  -9  -4   10.64    0.16
  -3  -8  -2   39.32    0.20
  -2 -10  -8    1.11    0.09
  -2 -10  -3    2.66    0.11
   0 -10  -7   18.98    0.20
  -4  -9  -7    1.18    0.08
  -1 -10  -8  109.20    0.47
   1  -9  -6  153.95    0.50
  -3 -11  -5   55.15    0.32
  -3 -11  -6    0.67    0.10
  -2  -9  -2    0.27    0.08
  -4 -10  -6    3.46    0.12
  -4 -10  -5    1.32    0.13
  -4  -7  -2    6.21    0.11
  -3 -10  -3    0.41    0.10
  -1  -9  -2    8.63    0.11
  -5  -8  -6    0.29    0.08
  -5  -8  -5    5.01    0.13
  -3 -11  -7   22.42    0.22
  -3 -11  -4   53.04    0.29
   0 -11  -5  128.19    0.40
  -4  -9  -3    1.74    0.13
  -1 -12  -6  137.00    0.47
  -1 -12  -5  546.61    0.87
  -4 -10  -7   20.74    0.22
  -3  -9  -2   25.22    0.17
  -2 -11  -8    0.51    0.08
  -2 -11  -3    5.91    0.12
  -1 -11  -8  101.23    0.41
   0 -11  -7    0.18    0.08
  -3 -12  -6    9.39    0.16
  -2 -12  -4    8.38    0.16
  -1 -12  -7    0.45    0.11
   0 -11  -4    6.88    0.12
  -3  -7  -1   77.61    0.23
  -1 -12  -4  179.16    0.48
   1 -10  -5   16.66    0.20
  -4  -8  -2   55.98    0.24
  -5  -9  -6    2.45    0.10
  -5  -9  -5   27.38    0.23
  -3 -12  -7    4.29    0.11
  -3 -11  -3   19.58    0.18
  -2  -8  -1   73.08    0.23
  -3 -12  -4    1.99    0.12
  -2 -13  -6    8.45    0.15
  -1 -10  -2   19.64    0.22
   0 -12  -6   24.66    0.20
  -4 -10  -3    1.31    0.13
  -1 -13  -6    3.52    0.16
   0  -9  -2    0.85    0.06
  -3 -10  -2    1.62    0.09
  -2 -13  -7    6.86    0.14
  -2 -12  -3   13.81    0.17
  -1 -12  -8   87.44    0.37
   0 -12  -7   10.04    0.15
  -3 -13  -6    7.65    0.14
  -3 -13  -5    0.05    0.08
  -1 -13  -7   63.17    0.32
   0 -12  -4  223.30    0.49
  -4 -12  -6    0.61    0.09
  -4 -12  -5   14.09    0.18
  -1 -12  -3    0.78    0.09
  -5 -10  -5   11.29    0.15
  -4  -9  -2    4.07    0.11
  -3 -13  -7   18.12    0.20
  -3 -13  -4    0.73    0.12
  -2 -14  -6    0.82    0.09
   0 -13  -6   53.67    0.29
  -4 -11  -3   11.68    0.15
   0 -13  -5   65.17    0.30
   0 -10  -2   90.36    0.25
  -3 -11  -2   78.10    0.29
   0 -12  -8   32.58    0.24
   0 -13  -7   15.93    0.17
  -3 -14  -6    1.30    0.09
  -2 -14  -4   17.31    0.18
  -4 -13  -6    0.35    0.09
  -4 -10  -2    5.06    0.12
  -1 -14  -7    3.03    0.11
  -1 -14  -4  259.38    0.60
  -5 -11  -5    1.01    0.09
  -4 -12  -3   23.63    0.20
  -2 -15  -6    2.23    0.10
   0 -14  -6   19.12    0.19
  -4 -13  -4   23.41    0.20
   0 -14  -5    0.90    0.09
   0 -11  -2   41.24    0.19
  -3 -12  -2  131.35    0.39
  -1 -15  -5    0.21    0.10
  -1 -10  -1   95.22    0.26
  -2 -14  -3   50.43    0.27
   1 -12  -4   57.66    0.30
  -3 -15  -6    1.75    0.09
  -3 -10  -1   10.68    0.11
  -1 -14  -3 1094.13    1.13
   0 -14  -7    1.93    0.09
  -4 -14  -5    1.55    0.09
  -4 -11  -2   63.95    0.27
  -1 -15  -7    4.84    0.12
  -2 -13  -2  180.06    0.47
   1 -13  -6   29.54    0.21
   1 -13  -5   29.77    0.24
  -3 -15  -4   15.04    0.18
  -4 -14  -4    7.03    0.14
  -2 -16  -6    3.63    0.11
  -3 -13  -2  194.50    0.48
   0 -15  -5  144.16    0.44
  -3 -11  -1   14.63    0.14
   1 -12  -3    0.38    0.07
  -2 -16  -4    4.82    0.12
   0 -15  -7   12.02    0.15
   0 -10  -1   91.78    0.24
  -4 -15  -5    0.94    0.08
  -1 -16  -4    2.87    0.11
   0 -15  -4    5.00    0.12
  -4 -14  -3    4.36    0.11
  -3 -14  -2   11.18    0.15
  -2 -17  -5    7.99    0.14
   0 -13  -2   16.45    0.14
   0 -16  -6   26.91    0.21
   0 -16  -5    3.90    0.11
   1 -14  -4  110.01    0.42
  -2 -17  -4    1.48    0.10
   0 -11  -1   24.83    0.14
  -3 -17  -5   15.81    0.17
   0 -16  -4    0.98    0.12
  -1 -17  -4    1.00    0.09
  -1 -13  -1    3.07    0.09
   1 -15  -5   -0.07    0.11
  -3 -17  -4    7.45    0.12
  -3 -15  -2   34.37    0.23
   0 -14  -2    7.64    0.12
  -4 -16  -4   85.80    0.35
  -4 -14  -2  419.04    0.71
  -2 -18  -5   54.31    0.29
  -1 -10   0  122.80    0.28
   0 -17  -5    7.55    0.14
   0 -12  -1    2.47    0.08
  -3 -10   0    0.23    0.08
  -1 -18  -5   31.78    0.23
   0 -17  -6   11.61    0.14
  -2 -18  -4   11.03    0.15
  -2 -16  -2   15.76    0.18
   0 -17  -4   27.97    0.21
  -1 -18  -4    0.31    0.08
  -1 -16  -2    2.87    0.13
  -4 -16  -3    5.10    0.12
  -3 -16  -2    4.99    0.13
  -1 -11   0   15.78    0.13
   0 -15  -2  128.22    0.38
  -4 -17  -4   35.59    0.23
   0 -13  -1   34.20    0.18
   1 -16  -5   16.74    0.18
  -4 -15  -2    3.12    0.11
  -2 -15  -1   -0.17    0.10
   0 -18  -5    0.07    0.08
  -4 -13  -1    0.36    0.08
   1 -16  -4    2.07    0.09
  -2 -19  -4    4.73    0.12
  -1 -12   0   32.46    0.17
  -1 -17  -2   37.14    0.24
   0 -18  -4   12.58    0.16
   0 -10   0   50.51    0.18
   1 -11  -1  397.24    0.52
  -3 -17  -2    0.28    0.10
   0 -14  -1    0.22    0.08
  -3 -19  -4    0.89    0.08
   1 -17  -5    9.71    0.14
  -4 -14  -1   12.64    0.16
  -2 -19  -3   27.01    0.21
   0 -11   0    0.13    0.07
   1 -17  -4    0.35    0.09
  -3 -13   0    0.34    0.09
   0 -19  -5   10.72    0.13
   0 -17  -2    0.90    0.12
   0 -15  -1   77.53    0.29
  -3 -18  -2    9.84    0.16
   0 -19  -4    0.03    0.09
   0 -12   0   22.98    0.15
  -1 -20  -4    2.44    0.11
  -4 -15  -1    1.86    0.13
  -1 -14   0    0.15    0.09
   1 -13  -1    3.42    0.09
  -3 -14   0    1.78    0.10
  -2 -20  -3    4.48    0.12
  -2 -19  -2    4.31    0.12
   2 -14  -3    2.74    0.10
  -3 -17  -1    6.81    0.13
   0 -18  -2    0.12    0.13
   0 -13   0    0.09    0.07
   1 -18  -4    0.79    0.09
  -1 -19  -2    0.01    0.10
  -3 -19  -2    0.09    0.10
  -1 -15   0   17.37    0.18
  -4 -16  -1    0.08    0.10
  -2 -11   1    0.40    0.07
   0 -20  -4   38.10    0.24
   0 -14   0  310.53    0.53
  -3 -10   1    0.15    0.07
  -1 -11   1  455.22    0.56
   0 -17  -1  471.91    0.75
  -3 -18  -1   12.09    0.17
  -3 -11   1    0.58    0.07
   0 -15   0    0.08    0.10
  -4 -17  -1    0.15    0.10
  -3 -20  -2    1.52    0.10
  -2 -13   1    0.88    0.09
  -3 -12   1    0.05    0.09
  -1 -17   0    3.81    0.14
  -1 -13   1    3.54    0.10
   1 -19  -3    3.82    0.12
  -3 -19  -1    2.59    0.12
   0 -10   1   88.13    0.24
  -2 -14   1    3.02    0.11
   0 -21  -3   40.98    0.26
   0 -20  -2    1.92    0.11
   0 -16   0  304.24    0.59
  -1 -21  -2   70.58    0.33
   0 -11   1   24.12    0.15
   1 -20  -4    8.41    0.12
   0 -19  -1  600.92    0.93
   0 -12   1    2.54    0.09
  -1 -18   0  146.42    0.49
   0 -17   0   -0.17    0.13
   1 -19  -2    1.04    0.10
   2 -13  -1    0.77    0.10
  -3 -20  -1    5.26    0.13
  -1 -15   1   51.93    0.26
   0 -13   1   33.44    0.18
  -1 -22  -2    4.00    0.12
  -1 -19   0    8.71    0.16
   0 -14   1    0.15    0.10
   0 -18   0  317.53    0.67
   0 -15   1   74.93    0.32
  -3 -21  -1    6.77    0.13
   1 -19  -1  148.18    0.49
   0 -19   0    0.07    0.10
  -2 -22  -1    0.17    0.09
   0 -16   1  740.12    0.94
   1 -11   1  448.65    0.56
   2 -18  -2    0.22    0.15
   1 -13   1    3.27    0.11
   0 -17   1  467.45    0.79
  -1 -21   0   -0.03    0.09
   0 -20   0  160.51    0.52
   2 -13   0    0.80    0.11
   0 -22  -1    1.67    0.11
   2 -19  -2    1.59    0.13
   0 -18   1  117.90    0.44
  -3 -13   2    0.23    0.12
   0 -12   2    6.81    0.12
   0 -11   2   38.52    0.20
   0 -21   0   -0.09    0.10
  -2 -16   2    9.35    0.18
   0 -13   2   15.70    0.17
   1 -21  -1   36.99    0.26
  -3 -19   1    3.46    0.13
  -1 -20   1   65.82    0.42
   0 -19   1  575.80    0.96
   0 -14   2    7.52    0.16
   0 -15   2  124.82    0.42
   0 -22   0   13.69    0.19
  -2 -21   1    6.90    0.18
  -1 -23   0    2.69    0.11
   0 -20   1  252.38    0.68
   0 -16   2  417.24    0.76
   0 -17   2    0.91    0.15
   1 -21   0    0.09    0.11
   2 -13   1    3.47    0.14
  -2 -19   2    1.95    0.18
   1 -19   1  166.64    0.53
   1 -10   2   29.67    0.19
  -2 -22   1    3.30    0.12
  -1 -22   1   45.07    0.31
   0 -18   2    0.23    0.13
   1  -9   2    8.03    0.12
  -2 -11   3    0.12    0.14
   2 -15   1   -0.05    0.14
  -2 -13   3    8.67    0.16
  -1 -10   3   35.45    0.21
   1  -8   2   69.21    0.23
  -2 -20   2    8.29    0.19
  -2 -14   3    2.85    0.15
   0 -19   2   37.19    0.30
   1 -16   2    2.80    0.19
   2 -21  -1    6.82    0.17
  -3 -19   2   99.79    0.43
  -2 -15   3   37.74    0.27
   0 -12   3   29.66    0.23
   1 -17   2   37.44    0.31
  -2 -16   3   29.41    0.26
  -1  -8   3   57.85    0.23
   0 -14   3  392.14    0.74
   0 -13   3  623.85    0.89
   0 -11   3   91.18    0.33
  -2 -21   2    1.06    0.15
  -2  -8   3    0.42    0.09
   0 -10   3   75.58    0.30
  -2 -17   3   21.45    0.26
   0 -23   1    0.23    0.13
   0 -15   3    2.00    0.20
   1 -18   2  166.92    0.56
   0  -9   3   79.57    0.29
   1 -19   2    0.16    0.14
   2 -21   0    1.58    0.14
  -2 -18   3   37.58    0.30
  -1 -22   2    1.81    0.14
   0 -17   3    6.42    0.21
   2 -19   1   16.68    0.25
  -1 -19   3    4.03    0.20
   2 -13   2  194.32    0.51
   2 -12   2   25.26    0.22
   0 -18   3   95.08    0.46
   1 -20   2   50.95    0.35
   2 -11   2   29.48    0.22
   1 -14   3 1213.84    1.35
   0  -7   3  320.71    0.50
   2 -22   0   11.04    0.20
   2 -16   2   19.34    0.25
  -5  -4  -6    0.29    0.12
  -4  -6  -5    4.06    0.14
  -3  -4   0    0.02    0.08
  -7   1  -2    5.12    0.14
  -5  -5  -5    6.57    0.16
  -7   0  -4    0.11    0.09
  -7   0  -3    3.14    0.14
  -6  -3  -5    9.45    0.18
  -6  -3  -2    6.05    0.16
  -3  -7  -4    0.48    0.10
  -7   0  -2   -0.03    0.11
  -2  -7  -4   10.63    0.12
  -4  -7  -3    7.15    0.15
  -3  -7  -5  223.55    0.51
  -3  -6  -1    1.24    0.09
  -2  -7  -3    0.85    0.07
  -7   1  -1    0.30    0.10
  -6  -4  -2   92.30    0.41
  -6  -1   0    0.57    0.12
  -5  -5  -6   -0.01    0.09
  -5  -6  -5   31.65    0.25
  -4  -7  -5   61.52    0.31
  -7  -1  -2    4.68    0.14
  -4  -7  -2    7.01    0.14
  -7  -2  -4    0.34    0.07
  -6  -5  -4    7.18    0.14
  -7   0  -1    1.10    0.12
  -3  -8  -4    5.18    0.12
  -5  -7  -3   17.01    0.20
  -3  -8  -3    5.43    0.10
  -6  -5  -2  215.78    0.60
  -7  -1  -1    0.40    0.10
  -5  -7  -5   37.23    0.26
  -5  -6  -6    9.78    0.15
  -3  -8  -5   74.81    0.30
  -6  -6  -3   18.66    0.21
  -5  -7  -2   23.98    0.22
  -4  -7  -1   12.56    0.15
  -3  -8  -2   40.27    0.20
  -4  -8  -5   55.47    0.28
  -4  -8  -2   58.68    0.27
  -2  -8  -4   20.03    0.14
  -2  -8  -3    3.11    0.09
  -6  -5  -1    0.19    0.13
  -4  -6   0   57.93    0.24
  -3  -6   0   80.55    0.24
  -7  -2  -1   10.14    0.15
  -6  -6  -5    2.11    0.11
  -6  -6  -2   27.82    0.23
  -5  -8  -4    3.61    0.12
  -5  -8  -3   -0.12    0.10
  -5  -3   1    3.62    0.09
  -7   0   0    0.06    0.10
  -5  -7  -1  282.47    0.60
  -4  -9  -4   10.79    0.16
  -3  -9  -4   11.32    0.13
  -3  -9  -3    0.14    0.07
  -6  -4   0   63.37    0.30
  -6  -1   1   12.20    0.15
  -5  -8  -2   10.60    0.16
  -5  -7  -6    1.44    0.08
  -2  -8  -2   25.22    0.13
  -7  -3  -1    6.42    0.13
  -5  -8  -5    5.02    0.12
  -4  -8  -1    8.35    0.13
  -5  -6   0  311.76    0.59
  -4  -1   2    2.10    0.06
  -3  -8  -1  126.79    0.32
  -7  -5  -3    3.05    0.10
  -6  -7  -2    8.20    0.14
  -6  -6  -1   31.70    0.23
  -4  -9  -5   41.87    0.24
  -4  -9  -2    4.15    0.12
  -6  -7  -5    0.02    0.08
  -6  -2   1   24.74    0.20
  -4  -7   0  620.82    0.74
  -5  -9  -4    0.87    0.09
  -5  -9  -3    1.83    0.11
  -4  -5   1    0.65    0.08
  -3  -7   0   32.21    0.16
  -7  -4  -1   15.11    0.17
  -6  -5   0    0.06    0.09
  -5  -8  -1    2.36    0.13
  -2  -9  -4   17.14    0.13
  -2  -9  -3    5.60    0.09
  -7  -2   0   43.28    0.25
  -5  -9  -2   -0.05    0.09
  -5  -8  -6    0.40    0.08
  -4 -10  -3    1.46    0.11
  -4  -2   2   11.27    0.10
  -7  -6  -3    0.97    0.07
  -6  -7  -1  131.97    0.43
  -5  -9  -5   26.20    0.21
  -5  -7   0    5.93    0.13
  -3 -10  -3    0.47    0.07
  -6  -8  -2   80.02    0.35
  -5  -5   1   78.96    0.29
  -4  -9  -1    7.91    0.13
  -2  -8  -1   73.62    0.21
  -7  -3   0    9.08    0.14
  -4 -10  -2    5.32    0.14
  -3  -9  -1    4.58    0.09
  -2  -9  -2    0.32    0.06
  -7  -5  -1   28.56    0.21
  -6  -6   0   14.91    0.16
  -4  -8   0   25.77    0.17
  -5 -10  -4    0.89    0.10
  -5  -2   2   48.08    0.20
  -4 -10  -5    1.40    0.11
  -6  -4   1    0.93    0.10
  -5  -9  -1   11.00    0.14
  -4  -3   2    4.46    0.08
  -3  -8   0   54.50    0.20
  -3  -6   1    1.44    0.06
  -5 -10  -2   -0.04    0.09
  -7  -4   0   37.39    0.23
  -5  -6   1    1.45    0.09
  -7  -7  -2    0.02    0.06
  -4 -11  -3   11.69    0.14
  -5  -3   2    7.13    0.11
  -4 -10  -1    5.73    0.12
  -2 -10  -3    2.90    0.07
  -6  -5   1   13.38    0.14
  -4 -11  -2   63.78    0.27
  -4  -9   0   -0.07    0.09
  -4  -4   2    4.62    0.09
  -3 -10  -1   10.81    0.11
  -2  -9  -1   13.98    0.11
  -7  -5   0   42.02    0.24
  -6 -10  -3    2.34    0.09
  -6 -10  -4    4.70    0.10
  -6  -9  -1   43.71    0.26
  -5 -11  -4    0.05    0.09
  -5  -7   1    1.60    0.10
  -3  -9   0   36.48    0.17
  -3  -7   1   33.47    0.16
  -7  -8  -2    4.49    0.10
  -6 -10  -2    0.10    0.08
  -5  -9   0    3.03    0.12
  -5  -4   2   31.76    0.18
  -2  -8   0  915.61    0.67
  -6  -6   1    6.94    0.12
  -4  -5   2   97.19    0.26
  -7  -6   0    8.91    0.13
  -5 -11  -5    0.90    0.07
  -4 -12  -3   23.69    0.17
  -4 -11  -1    6.71    0.12
  -4 -10   0   76.22    0.28
  -5  -5   2   54.90    0.23
  -6 -11  -3    0.23    0.07
  -6 -10  -1    1.44    0.09
  -5 -12  -3   13.65    0.15
  -5 -10   0  681.13    0.88
  -3  -8   1    5.85    0.09
  -7  -4   1    5.09    0.11
  -6  -9   0    0.71    0.09
  -6  -7   1    0.15    0.09
  -5 -12  -4    5.00    0.10
  -3 -12  -4    1.79    0.09
  -3 -10   0    0.33    0.07
  -4  -6   2   27.48    0.15
  -3 -12  -2  132.69    0.35
  -2 -11  -2   26.69    0.14
  -6  -4   2   12.51    0.13
  -7  -5   1    0.63    0.08
  -5  -6   2  221.37    0.45
  -7  -9  -1    9.96    0.13
  -6 -11  -1   47.38    0.26
  -6 -10   0    2.20    0.09
  -6  -8   1   20.92    0.17
  -5 -12  -1    4.14    0.10
  -5 -11   0  309.16    0.60
  -7  -8   0   -0.05    0.07
  -6  -5   2    4.54    0.11
  -5 -13  -3   24.28    0.18
  -4 -13  -4   22.66    0.17
  -4  -7   2    3.22    0.08
  -6 -12  -2   91.44    0.35
  -3 -11   0  215.88    0.41
  -7  -6   1    0.70    0.06
  -5 -13  -4   24.40    0.18
  -5  -7   2  110.78    0.32
  -4 -10   1   96.78    0.31
  -2 -12  -3   13.94    0.11
  -3 -13  -2  196.68    0.43
  -5 -10   1    1.49    0.11
  -2 -10   0   65.70    0.20
  -6 -12  -1   12.54    0.14
  -6  -9   1   12.53    0.14
  -6  -6   2    0.42    0.09
  -4 -13  -1    0.32    0.10
  -3  -7   2    3.43    0.07
  -2 -12  -2   23.48    0.14
  -7  -9   0    2.54    0.09
  -5 -13  -1  132.30    0.41
  -4  -8   2 1295.53    1.02
  -7  -7   1   77.52    0.31
  -5  -8   2  147.81    0.39
  -4 -14  -3    4.32    0.10
  -3 -10   1    0.13    0.06
  -4 -14  -2  450.91    0.70
  -6 -13  -2    0.70    0.06
  -6  -7   2   -0.16    0.09
  -4 -11   1   43.38    0.22
  -3 -12   0   26.01    0.17
  -6 -10   1    2.74    0.11
  -5 -11   1  214.97    0.49
  -4 -14  -4    6.89    0.11
  -4  -4   3    1.16    0.06
  -2 -12  -1   72.32    0.23
  -2  -9   1  318.75    0.43
  -7  -8   1    0.88    0.07
  -6 -13  -1   10.25    0.13
  -4  -9   2 1322.15    1.06
  -3 -14  -2   11.78    0.14
  -2 -11   0   50.75    0.19
  -6 -12   0    9.63    0.12
  -5  -9   2  159.32    0.40
  -4 -14  -1   13.55    0.15
  -4  -5   3    8.52    0.10
  -3 -11   1    0.73    0.08
  -1 -10  -1   96.44    0.21
  -6  -8   2    1.03    0.08
  -5 -14  -1   29.66    0.21
  -2 -13  -2  182.66    0.37
  -6 -11   1  105.00    0.36
  -4 -12   1   67.56    0.28
  -3 -13   0    0.31    0.09
  -5 -12   1   32.23    0.21
  -4 -15  -2    3.38    0.10
  -4  -6   3  157.96    0.34
  -3  -9   2   19.90    0.14
  -3  -4   3  303.18    0.38
  -5 -15  -3    0.17    0.06
  -2 -10   1   68.17    0.21
  -2  -7   2 1112.87    0.73
  -6 -13   0    4.57    0.10
  -6  -9   2    6.87    0.12
  -4 -14   0   11.28    0.15
  -2 -13  -1    4.19    0.09
  -2 -12   0   27.39    0.15
  -6 -14  -1  148.00    0.43
  -5 -14   0    6.68    0.13
  -4 -15  -1    2.11    0.11
  -3 -12   1    0.06    0.09
  -3  -5   3   11.78    0.10
  -5 -15  -1    1.47    0.08
  -3 -15  -2   37.47    0.21
  -4 -13   1    0.10    0.09
  -4  -7   3   16.77    0.13
  -3 -10   2   74.72    0.25
  -5 -13   1    5.62    0.11
  -2 -14  -3   49.82    0.21
  -2 -14  -2    8.71    0.12
  -6 -10   2    0.44    0.09
  -5 -11   2    0.12    0.09
  -3 -14   0    2.15    0.10
  -2  -8   2   64.87    0.20
  -4 -16  -2  179.71    0.46
  -3 -15  -1   22.90    0.17
  -1 -12  -2   47.01    0.17
  -5 -16  -2    0.92    0.08
  -4 -16  -3    5.03    0.11
  -5  -8   3    0.32    0.09
  -4 -15   0   25.69    0.19
  -3 -13   1   69.71    0.27
  -2 -14  -1   15.83    0.14
  -2 -13   0    0.99    0.08
  -5 -15   0   38.99    0.23
  -4 -14   1    2.91    0.10
  -4 -12   2    1.30    0.11
  -6 -11   2    0.78    0.08
  -5 -14   1    9.66    0.14
  -3 -16  -3    0.29    0.10
  -3 -16  -2    5.74    0.11
  -1 -12  -1  211.77    0.36
  -5  -9   3    5.39    0.11
  -2 -12   1  160.66    0.36
  -2 -15  -2    0.77    0.10
  -1  -9   1  815.79    0.63
  -4 -17  -2   17.19    0.16
  -4 -16   0   21.12    0.18
  -2 -14   0    3.46    0.10
  -2 -10   2  137.77    0.32
  -1 -13  -2   88.19    0.25
  -6 -14   1    6.76    0.12
  -6 -12   2    1.33    0.08
  -5 -16   0    1.89    0.08
  -4 -17  -3    0.63    0.07
  -2 -15  -1    0.06    0.10
  -5 -15   1    5.72    0.12
  -5 -10   3  104.05    0.35
  -4 -15   1    1.18    0.09
  -5 -17  -1    0.45    0.07
  -4 -17  -1    0.18    0.07
  -2 -13   1    1.06    0.09
  -1 -13  -1    3.25    0.08
  -1 -10   1   14.51    0.12
  -3 -17  -2    0.31    0.08
  -3 -13   2    0.19    0.10
  -2 -16  -2   17.50    0.16
  -6 -10   3   -0.01    0.08
  -4 -17   0   40.86    0.24
  -5 -17   0   -0.06    0.07
  -5 -16   1    8.06    0.13
  -4 -18  -2   11.63    0.14
  -4 -16   1    1.08    0.09
  -1 -14  -2   71.60    0.23
  -2 -14   1    3.30    0.11
  -4 -18  -1   36.92    0.24
  -3 -14   2   10.56    0.17
  -2 -12   2   29.92    0.18
  -2  -8   3    0.15    0.06
  -1 -14  -1  241.14    0.44
  -1 -13   0   20.65    0.15
  -1  -8   2  147.89    0.29
  -4 -15   2    1.79    0.09
  -5 -15   2    1.51    0.08
  -3 -18  -2   10.79    0.14
  -4 -18   0   10.60    0.14
  -4 -17   1    0.03    0.08
  -2 -15   1    2.55    0.12
  -3 -15   2    4.52    0.12
  -2 -17  -1   42.13    0.24
  -1 -15  -2  137.58    0.34
  -1 -14   0    0.07    0.09
  -6 -12   3   13.27    0.15
  -4 -16   2    2.51    0.10
  -4 -19  -1    0.25    0.08
  -1 -13   1    3.73    0.10
  -3 -13   3    0.17    0.11
  -2 -14   2   20.78    0.18
  -2 -11   3   -0.10    0.09
  -4 -18   1   10.77    0.14
  -3 -19  -2   -0.05    0.09
  -2 -16   1    6.66    0.14
  -3 -19  -1    3.33    0.11
  -1 -15   0   17.60    0.17
  -3 -14   3    0.08    0.13
  -2 -18  -2   20.09    0.18
  -5 -11   4    0.25    0.10
  -4 -17   2    4.06    0.11
  -2 -18  -1   18.05    0.17
  -5 -17   2    0.38    0.07
  -3 -18   1   26.81    0.21
  -2 -15   2    9.99    0.16
  -1 -16  -1  142.20    0.38
   0 -11   0    0.04    0.05
  -2 -18   0   53.79    0.30
  -2 -17   1   10.46    0.17
  -4 -19   1    0.10    0.07
  -1 -16   0   20.58    0.19
  -4 -18   2    6.41    0.13
  -4 -16   3   -0.13    0.07
  -1 -15   1   52.11    0.27
  -3 -20  -1    5.77    0.12
  -2 -16   2    8.25    0.15
  -2  -7   4    5.21    0.11
  -2  -6   4    0.98    0.07
  -2  -5   4  241.93    0.38
  -3 -19   1    3.70    0.10
  -2 -19  -1   16.30    0.17
  -2  -8   4    9.75    0.13
  -1 -17  -1  768.40    0.93
  -1  -9   3  171.43    0.36
  -5 -13   4    7.92    0.13
  -2 -14   3    2.55    0.14
  -3 -16   3   25.23    0.21
  -2 -18   1   49.84    0.29
  -2 -19   0   44.70    0.27
  -1 -17   0    3.83    0.14
   0 -13   0    0.02    0.06
  -4 -17   3    0.80    0.09
  -2 -17   2  220.76    0.58
   0 -14  -1    0.35    0.08
  -1 -11   3   88.83    0.31
  -3 -20   1   30.97    0.25
  -3 -17   3    6.43    0.16
  -4 -15   4   12.40    0.17
  -1 -12   3    0.51    0.10
  -2 -20  -1    3.21    0.13
  -2 -12   4    4.81    0.16
  -4 -18   3    4.41    0.12
  -3 -21   0    0.80    0.09
  -2 -18   2    0.30    0.10
  -2 -16   3   31.18    0.25
  -1 -18   0  152.68    0.51
   0  -9   2    0.64    0.07
  -2 -20   0   43.08    0.28
  -4 -16   4   10.57    0.16
  -3 -18   3    4.32    0.12
  -3  -9   5  143.82    0.42
  -1 -18   1  132.47    0.47
  -4 -12   5   31.47    0.25
  -2 -20   1   44.12    0.28
  -2 -19   2    1.64    0.13
  -2 -14   4    0.04    0.14
  -3 -11   5   10.32    0.18
  -1 -19   0    8.86    0.17
  -2 -21  -1    7.78    0.14
  -1 -17   2   27.47    0.26
  -4 -17   4    0.68    0.10
  -2 -21   0    1.54    0.10
  -1  -9   4   24.15    0.18
  -1  -8   4   90.79    0.29
  -1  -7   4    2.98    0.10
  -4 -13   5  145.82    0.49
  -1 -19   1  135.75    0.53
  -4 -14   5  120.46    0.46
  -3 -13   5   17.47    0.19
  -2 -16   4    4.48    0.14
  -2  -8   5   31.98    0.21
  -1 -12   4   58.25    0.35
   0 -17  -1  471.66    0.74
  -2 -10   5    1.57    0.14
  -2  -7   5   18.00    0.16
   0 -17   0   -0.08    0.13
   0  -9   3   88.98    0.28
   0  -8   3   45.37    0.20
  -3 -20   3    5.71    0.13
  -3 -14   5    8.15    0.16
  -2 -19   3   -0.15    0.12
  -1 -13   4  139.84    0.46
   0 -10   3   83.35    0.29
   0  -7   3  338.64    0.48
  -3 -18   4    7.75    0.16
  -2 -11   5    1.59    0.11
   0 -11   3   99.45    0.33
  -2 -12   5   22.29    0.24
  -2 -17   4    0.01    0.10
  -1 -19   2    1.18    0.13
   0 -17   1  473.58    0.82
   0 -12   3   30.83    0.21
  -3 -15   5   41.87    0.30
  -2 -21   2    0.98    0.10
  -2 -13   5   64.37    0.34
   0 -13   3  654.31    0.90
  -3 -19   4    0.52    0.09
  -2 -14   5   82.92    0.40
  -3 -16   5    1.47    0.12
   0 -14   3  409.06    0.76
  -1 -21   1   34.57    0.28
   0 -17   2    1.02    0.14
  -2 -15   5   36.74    0.28
   0 -19   0    0.04    0.14
  -3 -17   5    5.25    0.14
  -2 -21   3    9.00    0.17
  -2 -16   5    4.99    0.15
   0 -16   3  111.15    0.46
  -1  -8   5   21.71    0.20
   0 -11   4    6.32    0.14
   0 -10   4   17.48    0.18
   0  -9   4  220.51    0.49
   0 -12   4  209.89    0.55
   1 -11   2   36.68    0.27
   1 -10   2   42.28    0.21
   1  -9   2    6.51    0.11
   1  -8   2   73.31    0.24
  -2 -20   4    4.57    0.14
  -2 -17   5    2.88    0.14
  -1 -18   4    0.76    0.12
   0 -17   3    6.19    0.16
   0 -13   4   38.85    0.28
   0  -7   4  567.31    0.71
   0 -19   2   38.87    0.30
   1 -13   2   87.07    0.34
   0 -14   4   14.41    0.21
   0  -6   4 1338.94    1.05
   1 -14   2   66.68    0.32
  -2 -10   6   12.13    0.19
  -1 -22   2    1.42    0.12
  -2 -11   6  118.23    0.46
  -1 -16   5   15.00    0.25
  -1  -5   5  129.59    0.35
  -2 -13   6    1.06    0.14
   0 -20   2    1.67    0.13
   0 -16   4    0.94    0.12
   1 -17   0    3.57    0.14
   1 -12   3    0.56    0.12
   1 -11   3   56.33    0.28
  -2 -14   6    1.85    0.14
   0 -19   3    0.14    0.11
   1 -13   3   42.93    0.28
   1  -8   3   29.51    0.19
  -2 -15   6   36.08    0.31
   1 -14   3 1083.14    1.31
   0 -21   2    1.55    0.13
   1 -18   0  144.99    0.52
   1 -17   2   36.58    0.31
   1 -18   1   24.92    0.24
   1  -7   3   72.52    0.27
   0 -20   3    1.63    0.11
   0 -13   5   60.89    0.36
  -1 -10   6   20.41    0.26
   0 -14   5    0.65    0.16
   1 -18   2  163.00    0.59
  -1 -13   6   30.33    0.27
  -1  -9   6  144.40    0.52
  -1 -19   5    0.50    0.11
  -1 -14   6    8.62    0.20
   0 -19   4   -0.16    0.12
  -1  -8   6   11.22    0.27
  -1 -15   6   43.91    0.36
   1 -10   4   38.98    0.26
   1 -19   2    0.15    0.13
   1 -14   4  261.13    0.72
   0  -6   5   29.61    0.22
  -1 -16   6   35.26    0.31
   1 -20   1  131.88    0.57
   1 -18   3   66.21    0.40
   1  -8   4   24.61    0.20
   1 -16   4    2.89    0.14
   2 -11   1  252.14    0.53
  -1 -17   6    0.68    0.12
   0 -18   5    0.02    0.12
   2 -13   1    3.75    0.11
   2 -12   0   26.81    0.19
   2 -13   0    0.75    0.10
   2 -10   0   64.63    0.25
   0 -21   4    0.12    0.10
   2 -14   0    3.12    0.12
   2  -9   1   13.03    0.15
   1 -21   1    9.40    0.20
   2 -15   1   -0.04    0.12
   2 -10   2  161.78    0.45
   0 -13   6   47.88    0.37
   0 -12   6   21.47    0.25
   0 -11   6  185.41    0.64
   2 -14   2    8.68    0.19
   0 -14   6   18.32    0.27
   1 -18   4    0.29    0.13
   2  -9   2    0.14    0.10
   0  -9   6  259.20    0.69
   1 -12   5  544.97    1.03
   1 -11   5  756.54    1.18
   2 -16   1    7.39    0.18
   1 -10   5   87.83    0.41
   2  -8   2   24.29    0.18
   0  -4   5  338.07    0.58
   1 -15   5    0.39    0.15
   2 -16   2   16.10    0.22
   2 -13   3  112.52    0.47
   2 -12   3   14.10    0.21
   2 -11   3    5.71    0.16
   0  -8   6  131.50    0.47
   1  -5   4 2096.35    1.45
   2 -17   1   39.92    0.31
   2 -14   3   54.86    0.36
   2 -10   3    2.94    0.13
   2 -15   3  229.33    0.72
  -1 -12   7    3.16    0.16
   1  -8   5   35.66    0.26
   2  -9   3    5.51    0.14
   2  -7   2   52.97    0.26
  -1 -13   7    2.16    0.15
   0  -7   6  523.52    0.90
  -1 -14   7    0.41    0.13
   1 -20   4    2.97    0.15
   1 -17   5    5.81    0.18
   2 -18   1   17.28    0.26
   2  -8   3    2.91    0.12
  -1 -15   7    0.93    0.12
   1  -7   5  293.07    0.65
   2 -18   2   17.22    0.24
   1  -4   4 1651.98    1.25
   1 -18   5   30.37    0.33
   2 -14   4   18.03    0.27
   2 -13   4  176.58    0.65
   2 -12   4    9.24    0.21
   2 -11   4   77.05    0.42
   2  -6   2 1404.91    1.12
   0  -6   6   18.46    0.20
   0  -3   5  137.09    0.37
   2 -19   1   15.39    0.24
   2 -10   4   79.22    0.40
   2  -7   3    0.62    0.11
   1  -6   5    1.39    0.12
   2 -19   2    4.30    0.17
   2 -18   3    0.91    0.16
   1 -19   5    0.05    0.11
   2  -9   4   19.63    0.24
   1 -12   6  150.02    0.61
   1 -11   6   55.91    0.39
   2  -6   3  975.06    1.05
   0  -5   6   20.82    0.21
   1 -15   6   12.11    0.22
   1 -10   6   82.49    0.44
   2 -19   3   27.99    0.30
   2 -17   4    1.26    0.14
   2  -8   4   22.14    0.22
   0 -14   7    1.76    0.14
   0 -13   7   15.37    0.24
   0 -12   7    8.99    0.20
   0 -11   7    0.08    0.17
   1  -5   5  371.62    0.70
   1  -9   6  311.50    0.81
   0 -15   7   11.91    0.22
   0 -10   7   18.54    0.26
   2  -7   4   10.57    0.17
   1 -17   6    1.75    0.14
   1  -8   6  417.04    0.91
   2 -20   3    4.52    0.17
   2 -14   5   35.87    0.35
   2 -12   5  110.83    0.54
   2 -11   5    0.36    0.18
   0  -9   7   77.13    0.44
   2 -15   5    8.48    0.22
   2 -19   4    4.77    0.17
   2  -9   5  196.50    0.66
   2  -6   4  224.51    0.57
   1  -7   6  403.69    0.86
   1  -4   5   35.52    0.26
   2 -17   5    7.73    0.19
   3 -14   2   12.72    0.22
   3 -15   2   40.16    0.33
   3 -14   1   12.53    0.21
   3 -15   1   23.93    0.27
   1  -6   6   22.86    0.25
   2 -18   5   56.81    0.44
   3 -16   2    6.11    0.18
   3 -11   3   22.46    0.26
   3 -15   3   23.16    0.29
   3 -10   3    0.51    0.18
   1 -12   7    0.43    0.18
   3 -17   2    0.16    0.15
   3 -16   3    0.06    0.18
   1 -14   7    3.39    0.16
   1 -11   7    6.59    0.21
   2 -19   5    2.12    0.14
   3 -12   0   27.68    0.22
   1 -15   7    5.44    0.18
   1  -3   5  191.26    0.50
   2 -14   6    0.77    0.12
   2 -13   6    9.16    0.21
   2 -12   6   29.33    0.32
   3 -17   1    7.81    0.19
   3  -9   3    0.26    0.14
   1 -10   7   31.56    0.34
   2 -15   6    2.36    0.15
   3 -18   2   10.98    0.22
   3 -17   3    5.75    0.19
   3 -14   4   54.42    0.42
   3 -13   4    0.92    0.16
   1  -5   6   22.51    0.24
   3 -15   4   15.66    0.25
   3 -11   4   59.52    0.41
   3 -10   0    0.48    0.11
   1  -9   7  337.21    0.91
   2 -16   6    3.69    0.17
   3 -18   3   25.06    0.30
   3 -16   4    3.82    0.16
   2 -17   6    4.36    0.17
   3 -19   2   -0.02    0.15
   2  -8   6  154.43    0.61
   2  -5   5   53.65    0.33
   3 -19   3   34.91    0.34
   1  -4   6    2.50    0.15
   3 -18   4   39.25    0.35
   3 -13   5    0.13    0.18
   3  -8   4    4.99    0.20
   1  -2   5   64.32    0.31
   3 -14   5    4.39    0.19
   3 -12   5    5.22    0.18
   3 -11   5   56.88    0.43
   3 -15   5   81.84    0.55
   2  11  -3   -0.06    0.11
   6   0   0    8.00    0.23
   3   5  -3   12.03    0.19
   4  12  -3   45.33    0.40
   6   2  -1   23.88    0.30
   6   8  -2    0.38    0.15
   6   9  -2    6.81    0.22
   6  10  -2    0.36    0.12
   7   2   1    9.79    0.22
   3   0  -2    0.24    0.10
   4  -2  -1  111.50    0.42
   5  16  -2    8.72    0.21
   6   7  -2    0.22    0.14
   6  11  -2    0.61    0.12
   7   4   0   36.91    0.36
   3   4  -3  306.89    0.73
   5  -1  -1   29.60    0.28
   6   6  -2    0.56    0.14
   6  12  -2    1.35    0.14
   4   4  -3    1.48    0.15
   4  14  -3   -0.04    0.16
   5   8  -3    0.18    0.16
   5   9  -3    5.13    0.21
   6   1  -1   11.71    0.24
   6  13  -2   10.00    0.21
   7   3   0    8.35    0.21
   7   8  -1    0.72    0.13
   7   9  -1    6.75    0.18
   5  11  -3  280.99    0.96
   6  -1   0    0.41    0.15
   3   3  -3  558.08    0.94
   5   6  -3   23.85    0.31
   5  12  -3   55.30    0.45
   6   4  -2   12.19    0.26
   5   5  -3    1.95    0.19
   7   2   0   39.92    0.35
   7   5  -1    0.37    0.14
   6   3  -2    6.20    0.23
   5  -2  -1    5.64    0.14
   6   0  -1   -0.18    0.12
   3   2  -3  305.50    0.67
   4  -3  -1   32.43    0.22
   5   0  -2    0.20    0.13
   5  14  -3   25.83    0.30
   7   4  -1    5.03    0.17
   4   2  -3    4.30    0.15
   7   1   0   49.36    0.37
   5   3  -3    3.60    0.17
   7   3  -1    0.51    0.13
   5  15  -3   19.44    0.25
   6   8  -3    5.09    0.17
   6   9  -3    0.92    0.11
   6  10  -3    0.04    0.10
   3   1  -3    0.33    0.10
   6  -1  -1   12.77    0.22
   7   8  -2   13.01    0.23
   7   9  -2   17.85    0.26
   3   8  -4   94.74    0.45
   3   9  -4   35.80    0.29
   4   8  -4  114.22    0.53
   7   7  -2   29.59    0.32
   3   7  -4  367.27    0.83
   3  10  -4   57.62    0.36
   4  10  -4  150.02    0.63
   5   2  -3   36.88    0.33
   6   1  -2    1.38    0.15
   6  12  -3   10.34    0.20
   7   2  -1    2.33    0.14
   3  11  -4   77.20    0.42
   4   6  -4  871.88    1.39
   6   5  -3    0.98    0.12
   4  12  -4    9.63    0.20
   4   5  -4  655.19    1.17
   4   0  -3    0.12    0.09
   5   8  -4    0.18    0.13
   7   4  -2    5.48    0.16
   3   0  -3  133.94    0.42
   4  13  -4  125.89    0.56
   5   7  -4   10.44    0.21
   5  10  -4   13.63    0.23
   4   4  -4  136.25    0.54
   5   6  -4   17.65    0.25
   5  11  -4    0.28    0.11
   6   3  -3   20.24    0.27
   2   9  -4  102.93    0.39
   3   4  -4    0.20    0.10
   7   3  -2   66.95    0.42
   5   5  -4   79.17    0.46
   5  12  -4    7.49    0.18
   4   3  -4    4.13    0.15
   6   2  -3    3.94    0.16
   3   3  -4    0.09    0.11
   4  -1  -3    6.99    0.14
   5   4  -4   37.31    0.32
   5  13  -4    5.88    0.16
   6  -1  -2    1.28    0.13
   7   2  -2    4.91    0.15
   2   5  -4  218.25    0.53
   3  -1  -3    0.32    0.09
   7   7  -3    0.05    0.08
   4   2  -4    0.58    0.12
   6  -3  -1    1.36    0.12
   7   6  -3    0.02    0.09
   5  14  -4    7.84    0.17
   6   7  -4   17.92    0.24
   3   2  -4   30.18    0.23
   6   6  -4    1.43    0.12
   6  11  -4   13.91    0.23
   7   1  -2   11.53    0.19
   7   5  -3    9.72    0.19
   2   4  -4  122.54    0.39
   5   2  -4  161.41    0.61
   4   1  -4    8.51    0.17
   6  -2  -2    1.67    0.11
   7   4  -3   11.65    0.19
   4  -4  -2    4.46    0.11
   6   0  -3   -0.09    0.11
   3  -2  -3  298.44    0.58
   3   1  -4    0.37    0.08
   6   4  -4   20.54    0.26
   4   8  -5   43.43    0.33
   5  -2  -3   38.02    0.29
   5   1  -4   22.56    0.25
   7   0  -2    0.07    0.10
   4   7  -5    4.08    0.14
   4  10  -5   18.82    0.22
   6   3  -4   50.27    0.38
   4   0  -4    2.18    0.13
   3   8  -5   35.51    0.28
   3   9  -5  136.87    0.50
   4   5  -5  158.25    0.57
   4  11  -5   21.88    0.25
   5   8  -5   15.01    0.22
   6  -1  -3   17.96    0.22
   7   2  -3    6.27    0.15
   2   2  -4  209.32    0.49
   3   7  -5    5.52    0.14
   3  10  -5   31.08    0.26
   4  -3  -3    5.72    0.12
   5   9  -5   29.75    0.29
   6  -3  -2    5.90    0.15
   6   2  -4   93.15    0.49
   3   0  -4    0.18    0.08
   3   6  -5  123.70    0.47
   5   0  -4    0.00    0.12
   5   6  -5    1.45    0.12
   3   5  -5  367.38    0.80
   4   4  -5   20.01    0.23
   5   5  -5    5.24    0.14
   5  11  -5    9.20    0.18
   7  -1  -2   11.14    0.18
   4  -1  -4    8.78    0.15
   5  -3  -3    3.58    0.14
   7   1  -3   11.70    0.18
   3  -3  -3  541.78    0.75
   4  -5  -2   94.70    0.33
   4   3  -5   15.94    0.21
   6   1  -4   26.38    0.26
   2   1  -4   24.87    0.17
   5  -1  -4   22.19    0.24
   5   3  -5   32.85    0.29
   3   3  -5    0.22    0.12
   4   2  -5   10.34    0.18
   5  -5  -2   53.30    0.28
   7   4  -4    0.40    0.08
   4  -4  -3    1.15    0.10
   6  -4  -2   11.92    0.17
   6   6  -5   10.04    0.19
   7   0  -3    0.13    0.09
   3  -5  -2    8.32    0.10
   4  -2  -4    0.73    0.10
   5   2  -5    2.57    0.12
   6   5  -5    0.62    0.08
   2   7  -5   18.94    0.17
   2   8  -5   30.38    0.21
   7   3  -4    1.64    0.10
   2   6  -5   54.05    0.29
   3   2  -5   35.86    0.25
   4   1  -5    8.07    0.16
   5  -4  -3    2.70    0.11
   6   4  -5    2.93    0.12
   2   5  -5  222.25    0.54
   6  -3  -3   22.22    0.22
   5   1  -5    5.84    0.14
   6  -1  -4   28.42    0.26
   6   3  -5   29.14    0.28
   3   1  -5    1.82    0.11
   4  -6  -2   27.22    0.18
   4   0  -5   -0.03    0.11
   7   1  -4    2.39    0.10
   2  -1  -4   24.94    0.17
   4  -5  -3    8.60    0.13
   5  -3  -4   18.10    0.21
   5   0  -5   22.43    0.24
   2   3  -5  216.19    0.51
   4   6  -6   14.94    0.21
   4   7  -6   55.40    0.35
   4   8  -6   15.77    0.20
   5  -6  -2  216.47    0.51
   6  -2  -4  111.06    0.48
   4   5  -6    0.24    0.13
   4   9  -6   10.23    0.17
   5  -5  -3    1.84    0.12
   5   7  -6    2.92    0.12
   5   8  -6    1.43    0.10
   6   1  -5    0.04    0.08
   7  -2  -3    5.62    0.13
   3  -3  -4    0.07    0.07
   4  -1  -5    7.76    0.16
   4  10  -6    0.13    0.10
   5   9  -6    0.07    0.08
   3  -6  -2   49.07    0.20
   5  -1  -5    6.22    0.15
   7   0  -4    0.13    0.07
   3  -5  -3   11.31    0.12
   3   7  -6   51.73    0.33
   3   8  -6    0.37    0.12
   5  10  -6    0.02    0.07
   3   5  -6  190.89    0.59
   3   9  -6    9.18    0.16
   4   3  -6  482.61    0.98
   6   0  -5    0.11    0.07
   2  -2  -4  212.42    0.47
   3  -1  -5    1.71    0.11
   2  -4  -3  168.32    0.36
   2   1  -5   19.29    0.17
   3   4  -6  561.27    0.96
   4  -2  -5   10.46    0.17
   7  -1  -4    2.78    0.10
   4   2  -6  303.27    0.80
   7  -3  -3    1.76    0.08
   3  -4  -4    0.12    0.08
   4  -7  -2    3.16    0.08
   6  -5  -3    1.03    0.11
   6   5  -6    0.12    0.07
   5  -6  -3   23.52    0.20
   2   0  -5    0.07    0.08
   4   1  -6   74.47    0.40
   5   1  -6   20.77    0.25
   4  -5  -4  669.24    0.98
   4  -3  -5   16.29    0.20
   6  -4  -4   24.72    0.23
   6   3  -6    1.64    0.09
   2  -3  -4   64.99    0.30
   3  -6  -3   31.70    0.19
   5  -5  -4   82.63    0.39
   7  -2  -4    8.19    0.15
   1   6  -5   30.87    0.18
   6  -2  -5   12.12    0.17
   1   5  -5   89.95    0.40
   3   1  -6    0.89    0.11
   5   0  -6   -0.04    0.09
   2  -1  -5   19.11    0.16
   2   5  -6   65.02    0.31
   2   6  -6    5.97    0.13
   1   4  -5  266.06    0.49
   3  -3  -5    0.82    0.10
   6   1  -6   25.91    0.26
   3   0  -6    0.29    0.13
   4  -7  -3   17.24    0.16
   1   3  -5  184.75    0.46
   4  -6  -4  884.07    1.12
   5  -7  -3  355.47    0.69
   5  -4  -5   58.00    0.34
   6  -3  -5   35.48    0.27
   5  -6  -4   18.26    0.20
   6  -5  -4   18.89    0.20
   4   5  -7   16.97    0.22
   4   6  -7   11.66    0.19
   4   7  -7   51.47    0.35
   6   0  -6    0.35    0.08
   1   2  -5  291.92    0.54
   2  -2  -5  150.72    0.41
   3  -1  -6    0.84    0.14
   4   4  -7   14.98    0.21
   4   8  -7    4.07    0.12
   5   6  -7    0.99    0.09
   3  -6  -4  140.09    0.41
   5   3  -7    0.03    0.07
   6  -4  -5    3.58    0.12
   1   1  -5   85.00    0.29
   3   6  -7   30.57    0.25
   4   2  -7   36.85    0.29
   2  -6  -3   11.76    0.12
   2  -3  -5  219.71    0.49
   3  -2  -6    0.30    0.11
   3   4  -7   92.62    0.43
   3   7  -7   22.14    0.23
   6  -6  -4    1.63    0.10
   2  -5  -4  229.08    0.47
   4  -8  -3   51.40    0.26
   4  -7  -4  176.19    0.51
   4   1  -7    0.71    0.11
   3  -5  -5  407.81    0.74
   3   3  -7   18.86    0.21
   5  -7  -4   10.71    0.15
   5   1  -7    0.36    0.08
   3   2  -7   93.83    0.43
   4  -6  -5  114.50    0.45
   4   0  -7   -0.03    0.10
   3  -3  -6  133.37    0.49
   5  -6  -5    1.47    0.10
   5   0  -7    0.31    0.08
   6  -5  -5    0.54    0.08
   1  -3  -4  343.90    0.51
   2  -1  -6   30.93    0.23
   3  -7  -4  384.23    0.67
   2  -4  -5   81.69    0.32
   3  -8  -3  125.07    0.34
   1  -1  -5   85.74    0.29
   4  -1  -7    0.77    0.10
   5  -1  -7    0.40    0.09
   1   5  -6  109.20    0.36
   2  -6  -4    0.77    0.08
   3  -6  -5  128.28    0.43
   3   0  -7   29.81    0.25
   1   4  -6   23.54    0.18
   2  -7  -3   24.36    0.15
   2  -2  -6   10.47    0.16
   3  -4  -6  528.99    0.94
   4  -8  -4  114.72    0.42
   1   3  -6  103.38    0.35
   2   4  -7    1.41    0.13
   2   5  -7    0.65    0.11
   4  -5  -6    0.07    0.10
   5  -8  -4    0.10    0.10
   3  -1  -7  114.91    0.47
   5  -7  -5    0.71    0.10
   5  -5  -6   40.45    0.29
   6  -6  -5    9.46    0.16
   1  -2  -5  320.64    0.56
   1   2  -6   91.39    0.33
   2  -5  -5  238.21    0.52
   2  -3  -6  156.92    0.49
   3  -8  -4   94.59    0.35
   3  -5  -6  191.85    0.58
   1   1  -6    2.94    0.10
   2   1  -7  113.19    0.43
   4   5  -8    2.66    0.11
   5  -3  -7    0.12    0.08
   1  -3  -5  159.96    0.44
   3  -9  -3   62.24    0.25
   4   2  -8  132.66    0.55
   5  -6  -6    9.01    0.15
   1   0  -6   -0.03    0.08
   4  -9  -4   48.81    0.27
   6  -7  -5    7.74    0.14
   2  -6  -5   50.13    0.30
   2  -8  -3    0.22    0.06
   3  -6  -6    6.09    0.15
   3   5  -8    0.84    0.10
   3   3  -8    2.66    0.12
   4  -7  -6   56.92    0.34
   0   3  -5  163.74    0.35
   1  -4  -5  256.94    0.51
   3  -8  -5   34.18    0.25
   2  -5  -6   63.92    0.32
   2  -2  -7   39.56    0.29
   3   1  -8  336.04    0.88
   0   2  -5    2.47    0.07
   1  -2  -6   94.59    0.35
   2  -8  -4    8.60    0.13
   2  -7  -5   17.93    0.18
   3   0  -8   -0.07    0.10
   3  -7  -6   51.61    0.32
   2  -3  -7   17.69    0.21
   5  -9  -5   30.86    0.24
   1   3  -7   12.21    0.18
   1   4  -7    0.58    0.11
   4  -8  -6   15.16    0.21
   0   0  -5    0.06    0.06
   1  -3  -6  101.75    0.36
   1   2  -7  135.14    0.47
   2  -9  -3   28.85    0.17
   2   3  -8   59.63    0.35
   2   4  -8   20.28    0.22
   5  -6  -7    0.73    0.08
   1   1  -7   12.96    0.17
   0  -1  -5   70.09    0.25
   2  -8  -5   30.08    0.22
   2   1  -8    1.60    0.12
   0  -3  -4  122.18    0.29
   1  -4  -6   22.58    0.20
   2  -9  -4  104.23    0.34
   1  -7  -4    3.10    0.09
   1  -6  -5   30.33    0.20
   2   0  -8  267.04    0.74
   4 -10  -5   19.26    0.20
   1  -1  -7   12.54    0.19
   2  -5  -7    0.65    0.11
   4  -9  -6    9.73    0.16
   0   3  -6   45.93    0.23
   2  -1  -8    1.89    0.12
   1  -5  -6  115.16    0.40
   5  -9  -6    0.09    0.07
   0  -4  -4   12.01    0.11
   1  -8  -3   58.41    0.22
   3  -9  -6    8.79    0.16
   1  -7  -5   88.10    0.39
   2 -10  -3   22.43    0.16
   0  -3  -5  158.42    0.39
   0   0  -6   15.59    0.15
   2  -8  -6    1.81    0.13
   4  -8  -7    3.72    0.14
   1  -8  -4   85.12    0.30
   1  -3  -7   12.54    0.19
   2 -10  -4   -0.19    0.09
   2  -3  -8   57.55    0.38
   3 -11  -4   75.24    0.32
   1  -6  -6   75.76    0.34
   4 -10  -6    0.13    0.10
   0  -1  -6  142.81    0.41
   0  -5  -4 1549.71    1.08
   0  -4  -5  393.44    0.62
   1  -4  -7    0.90    0.13
   3  -1  -9   47.86    0.38
   0  -2  -6   37.00    0.23
   1  -8  -5   24.16    0.21
   2 -10  -5    1.87    0.12
   3 -10  -6    2.85    0.12
   4  -9  -7    1.61    0.10
   1   1  -8   14.61    0.19
   2  -9  -6   73.41    0.38
   1   0  -8    0.01    0.09
   3  -2  -9    8.62    0.17
   0  -5  -5   13.59    0.14
   0  -6  -4 1458.30    1.10
   1  -1  -8   15.14    0.20
   2 -11  -4  120.45    0.38
   2 -11  -3    0.10    0.08
   2   2  -9    5.80    0.14
   3 -12  -4   52.07    0.28
   3  -7  -8    1.01    0.09
   0   1  -7  188.63    0.52
   0   2  -7   83.40    0.36
   1  -2  -8   -0.28    0.11
   2   0  -9   -0.05    0.09
   0  -4  -6  120.29    0.40
   0   0  -7    0.22    0.12
   1  -6  -7   47.18    0.32
   4 -10  -7    0.16    0.09
   0  -6  -5   33.72    0.20
   2 -11  -5    1.45    0.13
   2  -1  -9   21.10    0.23
   0  -1  -7  166.58    0.52
   1  -3  -8    1.01    0.13
   3 -12  -5  215.82    0.57
   2  -2  -9    5.77    0.14
   3 -10  -7    5.14    0.13
   0  -7  -3  337.50    0.48
   0  -5  -6   23.68    0.20
   0  -2  -7   90.09    0.38
   1 -10  -3   35.24    0.20
   1  -7  -7   33.51    0.31
   2  -3  -9   47.48    0.33
   1  -9  -6  162.20    0.57
   0  -7  -5   70.23    0.29
   0  -3  -7    9.96    0.17
   2 -12  -4    4.75    0.12
   0  -6  -6   20.68    0.20
   1  -5  -8   -0.02    0.12
   2 -11  -6  112.55    0.46
   3 -12  -6   60.37    0.35
   3  -9  -8   -0.02    0.08
  -1   0  -5   15.01    0.13
   0  -8  -4  356.21    0.58
   2  -5  -9    0.01    0.08
   0  -8  -5   38.90    0.23
   1  -6  -8    0.52    0.11
   0  -7  -6  568.28    0.90
   0  -5  -7    5.00    0.15
   1   0  -9   15.26    0.25
  -1  -2  -5   66.78    0.32
   1 -11  -3   89.74    0.30
   0   0  -8   55.64    0.34
   0   1  -8   65.88    0.35
   1  -9  -7   24.93    0.30
   1  -2  -9   51.19    0.34
   2 -12  -6   33.48    0.28
  -1  -3  -5  168.20    0.43
   0  -1  -8   61.84    0.35
  -1  -4  -4 1643.62    1.08
  -1   1  -6   11.85    0.14
   0  -9  -4  249.42    0.50
   0  -6  -7    7.68    0.17
   0  -2  -8   18.17    0.23
   1  -3  -9   11.54    0.20
   2 -13  -4  178.21    0.48
  -1  -1  -6   11.38    0.15
  -1   0  -6   -0.11    0.08
   0  -9  -5  153.06    0.45
   0  -8  -6  136.00    0.47
   0  -3  -8   17.83    0.22
   1 -11  -6    1.86    0.17
   2  -7  -9   -0.05    0.08
  -1  -2  -6    2.49    0.15
  -1  -5  -4 2082.17    1.34
   0  -7  -7  124.64    0.49
   1 -12  -4   58.85    0.33
  -1  -3  -6    1.37    0.17
   0  -4  -8   21.65    0.23
   1 -11  -2  454.93    0.55
  -1  -5  -5  355.57    0.61
   0  -9  -6  294.72    0.68
   2 -13  -6    1.15    0.13
   2 -12  -7   35.24    0.27
   0 -10  -5   84.59    0.36
   0 -10  -4   19.67    0.17
   0  -5  -8   19.91    0.24
   1 -12  -3    0.48    0.08
   0  -8  -7    2.59    0.14
   1  -9  -8    0.21    0.12
  -1  -6  -4  302.76    0.51
   0 -10  -3   79.15    0.28
   2 -14  -4   -0.04    0.12
   2 -11  -8    0.09    0.08
  -1   0  -7  103.74    0.40
   2 -14  -5   80.36    0.37
  -1  -2  -7   81.55    0.38
   1 -13  -4  143.92    0.43
  -1  -7  -5  295.56    0.59
  -1  -7  -4    0.90    0.09
  -1  -3  -7   16.21    0.19
   1 -13  -5   26.92    0.26
   2 -13  -7   11.88    0.18
   0 -11  -5  123.68    0.44
  -1  -4  -7    4.04    0.14
   0  -1  -9   14.37    0.21
   2 -14  -6    1.66    0.12
   0  -2  -9   47.55    0.34
   1 -13  -6   30.69    0.26
  -1  -7  -6  416.21    0.76
  -1  -7  -3   93.68    0.30
  -1  -5  -7  124.66    0.46
   0 -11  -6  218.06    0.63
   1 -13  -3   67.13    0.28
  -1  -8  -5   35.37    0.24
  -1  -8  -4   22.05    0.20
   0 -11  -3   98.81    0.32
   0 -10  -2   94.93    0.26
   0  -4  -9   20.10    0.24
   1 -11  -8   23.35    0.29
   2 -15  -5   34.53    0.27
  -1  -8  -6  419.41    0.78
   0 -12  -4  223.58    0.53
   1 -14  -4  102.95    0.47
  -1  -9  -5   86.64    0.35
  -1  -8  -3   27.37    0.18
  -1  -7  -7   93.56    0.43
  -1  -2  -8    8.92    0.19
  -1  -1  -8   13.68    0.20
   0 -11  -7    0.30    0.11
  -1  -3  -8    5.47    0.14
   1 -14  -6    8.74    0.19
  -1  -9  -6  290.80    0.72
  -1  -4  -8    6.31    0.17
   1 -12  -8   22.64    0.27
  -1  -8  -7  427.94    0.86
  -1  -5  -8   11.41    0.19
   0 -13  -5   64.53    0.34
  -1 -10  -5   91.84    0.38
   0 -13  -4   38.63    0.26
   0 -11  -2   42.39    0.19
  -1 -10  -4   39.62    0.23
   0 -12  -7    6.57    0.17
   1 -15  -5   -0.01    0.11
  -2  -2  -5   14.25    0.15
  -1  -6  -8   12.54    0.19
   1 -14  -7    0.43    0.12
  -2  -3  -5    0.97    0.10
  -2  -1  -5   11.94    0.13
  -2  -4  -5  133.10    0.38
  -2  -3  -4  937.33    0.84
  -2  -2  -4  255.93    0.43
  -2  -1  -4   28.49    0.16
  -2   0  -5   -0.01    0.08
   1 -15  -6   44.36    0.32
  -2  -2  -6  142.05    0.41
  -1 -11  -5  796.03    1.05
  -2  -3  -6  141.62    0.42
  -1 -11  -4   21.60    0.22
  -1 -10  -3   53.41    0.24
   0 -14  -5    0.88    0.14
   0  -9  -9    4.60    0.14
  -2  -4  -6  155.16    0.45
  -2   0  -6  259.20    0.51
  -1  -8  -8   39.84    0.31
  -2  -6  -5  224.58    0.51
  -2  -5  -6    8.86    0.17
  -2  -5  -4  125.89    0.34
   0 -14  -6   20.04    0.24
   0 -14  -4   14.06    0.18
   1 -15  -7    0.70    0.10
  -2  -6  -4  209.50    0.44
  -1 -12  -5  558.18    0.90
  -1  -3  -9   23.13    0.24
  -2  -7  -5   41.16    0.25
  -1  -9  -8    0.39    0.09
   1 -16  -5   15.90    0.21
  -2  -4  -7    9.52    0.18
  -2  -4  -3   44.20    0.18
  -2  -3  -7    9.04    0.18
  -2  -2  -7    2.38    0.13
  -2  -1  -7    8.71    0.17
  -1  -5  -9   73.36    0.41
  -2  -7  -6  201.87    0.54
  -2  -7  -4    9.75    0.13
  -2  -8  -5   53.30    0.29
  -2  -5  -7    0.44    0.12
  -2  -5  -3  110.36    0.29
  -1  -6  -9   68.19    0.37
   0 -15  -5  128.32    0.48
  -2  -8  -6  143.39    0.48
  -2  -6  -7   16.52    0.22
   0 -15  -6    5.60    0.17
   0 -13  -8   38.86    0.32
  -1  -7  -9   53.17    0.36
   0 -15  -4    4.89    0.14
  -2  -9  -5  187.33    0.51
  -2  -7  -7   54.78    0.33
  -1 -12  -7    0.29    0.11
  -1 -10  -2   12.22    0.20
  -1 -12  -3    0.63    0.10
  -2  -9  -6  122.66    0.45
  -2 -10  -5   18.81    0.21
  -2 -10  -6  123.58    0.47
  -2  -8  -3    3.05    0.10
  -2  -5  -8    5.82    0.15
   0 -16  -5    3.87    0.13
   1 -17  -6    0.69    0.10
  -2 -10  -4   76.45    0.33
  -2  -9  -7    2.62    0.14
   0 -16  -6   25.66    0.24
   0 -15  -3    2.23    0.11
  -2  -6  -8   27.56    0.26
   5   7   5   35.15    0.37
   4   6   2    3.29    0.15
   5  -8   6    0.50    0.13
   5   6   4    2.79    0.19
   5  -8   5    5.43    0.18
   5  -7   4   29.45    0.31
   5   4   3  127.89    0.60
   3   6   1    1.13    0.11
   5  -5   3    0.23    0.16
   4   0   1    0.09    0.13
   4   9   3    1.88    0.17
   5   8   6    0.21    0.13
   4  -2   1  450.59    0.86
   4   2   1  453.40    0.88
   4   7   2    6.10    0.16
   5  -8   4    3.56    0.19
   5   0   2   -0.20    0.18
   6  -1   6   84.30    0.56
   4   3   1    0.48    0.13
   5  -2   2    9.93    0.23
   5  -1   2    1.23    0.18
   5   1   2    1.31    0.19
   5   6   3   20.60    0.28
   6  -1   5  245.94    0.92
   6   0   5    0.19    0.12
   6   1   5  253.22    0.93
   3   7   1   76.04    0.33
   5   2   2   10.32    0.24
   6  -2   5   61.31    0.49
   6   2   5   70.12    0.51
   4   4   1   76.18    0.38
   4   8   2   58.61    0.37
   4  10   3    1.44    0.17
   5   3   2   75.96    0.47
   5   9   5   31.25    0.34
   6   0   4    0.20    0.19
   6   3   5   10.24    0.23
   4  -5   1  439.34    0.86
   5  -4   2   11.18    0.24
   5   7   3   16.16    0.29
   6  -4   5    8.88    0.23
   6  -2   4   76.34    0.52
   6  -1   4  149.70    0.72
   6   1   4  155.64    0.73
   5   4   2   11.19    0.24
   6   2   4   80.17    0.54
   6   4   5    9.22    0.22
   5  -5   2  120.19    0.57
   6  -5   5    7.49    0.20
   6   3   4    7.77    0.22
   5  -8   3    0.04    0.18
   5   9   4    0.90    0.18
   3   8   1  128.79    0.44
   4  -6   1   76.91    0.38
   6   4   4   49.34    0.43
   6   5   5    6.45    0.19
   5   8   3    0.04    0.16
   4   6   1   77.12    0.40
   4   9   2    4.10    0.17
   5  -6   2  203.69    0.71
   6  -6   5    2.75    0.15
   6  -1   3    6.20    0.20
   6   0   3   -0.03    0.15
   6   1   3    5.29    0.21
   5   6   2  210.91    0.78
   6  -2   3    3.88    0.20
   6   2   3    3.59    0.19
   6   6   5    2.76    0.17
   5   0   1    0.61    0.21
   6  -6   4    2.90    0.18
   5  -7   2   24.96    0.32
   5  -1   1   11.97    0.24
   5   1   1   12.14    0.25
   6  -4   3  267.38    0.93
   6   6   4    3.20    0.19
   4   7   1   12.35    0.20
   5  -2   1   50.16    0.38
   5   2   1   51.72    0.40
   5   9   3    1.50    0.20
   6   4   3  262.03    0.96
   6   7   5    0.31    0.12
   3   9   1    4.77    0.14
   5   3   1    1.05    0.20
   4  -1   0   69.08    0.37
   4   0   0   15.44    0.22
   4   1   0   68.86    0.37
   6  -5   3  100.91    0.59
   4  -2   0   54.84    0.34
   5  -4   1   19.91    0.28
   6  -7   4    7.38    0.19
   6   7   4    7.42    0.23
   5   4   1   20.25    0.29
   6  -1   2    4.09    0.23
   6   0   2   50.79    0.44
   6   1   2    3.43    0.21
   4  -8   1    8.50    0.16
   4   3   0    3.80    0.16
   4   8   1    8.47    0.21
   5  -8   2   10.91    0.22
   5   8   2   11.31    0.24
   6  -6   3   21.18    0.31
   6  -2   2   45.45    0.42
   6   2   2   44.42    0.41
   6   6   3   23.28    0.35
   5  -5   1  646.50    1.28
   5  10   3    5.56    0.23
   3   6   0   79.03    0.35
   6   3   2    5.54    0.22
   4  -4   0    7.24    0.17
   4   4   0    7.35    0.18
   6   8   4    0.23    0.14
   6  -7   3   12.27    0.26
   6  -4   2   92.62    0.58
   6   4   2   93.49    0.60
   5  -6   1  766.11    1.38
   5   6   1  792.85    1.50
   4  -5   0   22.70    0.23
   5   9   2    0.30    0.19
   4   9   1    8.50    0.20
   7  -1   4   32.68    0.38
   7   0   4   -0.09    0.13
   7   1   4   31.86    0.37
   6  -8   3    6.87    0.23
   6   8   3    7.17    0.23
   6   9   4   32.57    0.36
   5  -7   1  289.61    0.88
   5   0   0    0.18    0.18
   6  -6   2   29.53    0.36
   4  -6   0   57.57    0.36
   5   1   0   21.74    0.30
   6  -1   1    0.53    0.21
   6   0   1    0.00    0.18
   6   1   1    0.10    0.18
   5  -2   0    1.75    0.19
   5   2   0    1.83    0.20
   5  10   2    0.00    0.20
   6  -2   1   75.90    0.55
   6   2   1   74.74    0.55
   7  -1   3   12.40    0.26
   7   0   3    4.10    0.20
   7   1   3   13.30    0.27
   6   3   1    2.89    0.21
   6   7   2    9.38    0.28
   7  -2   3   12.04    0.26
   5   8   1    2.46    0.17
   6   9   3   16.48    0.29
   5  -8   1    2.31    0.21
   6   4   1    0.19    0.20
   7  -3   3   13.87    0.27
   6  -4   1   -0.03    0.19
   7   4   3   19.87    0.32
   5  -5   0    1.62    0.17
   6  -5   1    0.16    0.17
   7  -5   3    4.08    0.18
   7  -1   2    4.04    0.19
   7   0   2    0.27    0.14
   7   1   2    4.73    0.19
   7   2   2    9.43    0.26
   7  -2   2    9.34    0.23
   6  -6   1   33.62    0.39
   7   6   3    1.42    0.16
   4  -8   0   26.81    0.26
   5  -6   0  306.27    0.92
   6   9   2   27.43    0.37
   7   4   2   20.54    0.32
   5   7   0    6.34    0.26
   6  -1   0    0.31    0.22
   6   0   0    8.47    0.26
   6   1   0    0.44    0.19
   4  -4  -1    2.45    0.16
   4   9   0   -0.04    0.17
   6   3   0  200.48    0.92
   6   8   1   38.43    0.43
   7   0   1    1.20    0.19
   6  -4   0   64.18    0.52
   6  10   2   -0.07    0.19
   7  -1   1    0.33    0.15
   7   1   1    0.03    0.17
   7   2   1   10.33    0.26
   5  -2  -1    5.71    0.22
   5   3  -1    3.47    0.26
   7  -6   2    8.83    0.23
   7  -2   1   10.24    0.24
   7   3   1    6.58    0.25
   6  -8   1   37.48    0.40
   5  -8   0   79.99    0.51
   6  -5   0    0.02    0.18
   7   4   1   14.94    0.31
   7   7   2   -0.13    0.15
   4  -6  -1   94.06    0.47
   5  -4  -1   52.42    0.44
   7  -4   1   15.93    0.30
   5   9   0    3.83    0.23
   6  -6   0   15.63    0.29
   5   6  -1    1.74    0.26
   7   6   1    3.94    0.23
   4  -7  -1  316.20    0.85
   6  -7   0   36.12    0.43
   6  -1  -1   13.06    0.31
   6   0  -1    0.11    0.20
   6   1  -1   12.47    0.30
   6  10   1    1.65    0.22
   7  -6   1    4.16    0.21
   7   0   0    0.17    0.18
   7   1   0   54.55    0.55
   5  -6  -1    1.40    0.18
   5  10   0  745.35    1.62
   6  -2  -1   24.17    0.39
   7  -1   0   50.86    0.52
   7   2   0   40.77    0.49
   7   7   1    0.42    0.16
   5   7  -1    1.77    0.25
   6   3  -1    1.86    0.22
   6   8   0   79.33    0.62
   7  -2   0   41.83    0.46
   7   3   0    8.69    0.25
   4   0  -2    0.42    0.14
   6   4  -1    0.88    0.27
   3   0  -2    0.30    0.14
   3   1  -2  128.26    0.52
   7   4   0   36.38    0.44
   3   2  -2    5.03    0.17
   4  -2  -2   11.65    0.23
   6  -4  -1    1.09    0.25
   7  -7   1    0.12    0.16
   4   3  -2    4.66    0.20
   5  -7  -1    1.95    0.22
   7  -4   0   38.73    0.46
   3  -2  -2    4.87    0.16
   4  -8  -1  311.39    0.84
   6   9   0    1.28    0.20
   5   0  -2    0.28    0.22
   6  -5  -1   14.15    0.32
   4  -4  -2    4.52    0.19
   5  -8  -1  662.07    1.44
   3  -4  -2   86.63    0.42
   6  10   0    2.55    0.24
   7  -6   0    9.46    0.26
   4  -5  -2  100.42    0.53
   5  -4  -2   33.00    0.39
   7  -1  -1   32.68    0.45
   7   0  -1   17.30    0.34
   7   1  -1   32.05    0.46
   7   2  -1    2.88    0.24
   4  10  -1  105.35    0.58
   7  -2  -1    2.41    0.18
   7   3  -1   -0.06    0.17
   3   6  -2   49.70    0.36
   5  -5  -2   57.15    0.50
   6  -7  -1    0.21    0.22
   6  -1  -2    1.44    0.24
   6   0  -2  558.55    1.62
   6   1  -2    1.15    0.21
   6   2  -2    1.75    0.21
   7  -7   0    8.51    0.26
   7  -3  -1    0.59    0.21
   7   4  -1    4.69    0.22
   7   8   0    0.18    0.17
   4  -6  -2   29.07    0.33
   4   7  -2    3.48    0.22
   6   3  -2    6.60    0.28
   7   5  -1    0.40    0.18
   7  -4  -1    4.86    0.25
   5   7  -2  113.56    0.71
   3   7  -2    3.28    0.20
   5  -6  -2  225.77    0.91
   6  -8  -1   21.23    0.36
   6   5  -2    4.65    0.27
   6   9  -1   12.75    0.31
   7   6  -1    0.75    0.21
   3  -6  -2   49.00    0.33
   4   8  -2 1365.41    2.06
   6  -4  -2   12.59    0.31
   7  -5  -1    0.32    0.19
   7   9   0    2.79    0.19
   6   6  -2    0.62    0.23
   4   0  -3   -0.02    0.19
   4   1  -3    7.56    0.24
   5  -7  -2  110.58    0.66
   5   8  -2  144.51    0.81
   6  -5  -2    4.40    0.23
   7   7  -1   84.27    0.66
   4  -1  -3    7.27    0.24
   4   2  -3    4.65    0.22
   7  -6  -1    0.61    0.17
   3   8  -2   23.99    0.29
   4   3  -3    5.57    0.23
   5   0  -3   14.13    0.34
   5   1  -3   22.83    0.39
   6  10  -1    3.02    0.25
   4  -2  -3    4.16    0.21
   4   9  -2 1304.22    2.08
   5  -1  -3   23.53    0.39
   5   2  -3   38.85    0.47
   6  -6  -2    0.46    0.21
   6   7  -2    0.02    0.21
   7  -1  -2    9.99    0.30
   7   0  -2   -0.14    0.16
   7   1  -2   10.12    0.29
   7   2  -2    4.81    0.23
   4   4  -3    1.07    0.20
   5  -2  -3   39.03    0.45
   5   3  -3    3.49    0.27
   7   8  -1    0.31    0.18
   3   0  -3  131.00    0.60
   5   4  -3    2.54    0.26
   5   9  -2  157.52    0.84
   7  -7  -1   75.08    0.61
   3   2  -3  306.46    0.89
   5  -8  -2  145.11    0.74
   3   3  -3  539.09    1.19
   6   8  -2    0.62    0.21
   3  -2  -3  299.85    0.86
   4  -4  -3    0.98    0.18
   5  -4  -3    2.85    0.28
   6  -7  -2   -0.24    0.23
   6   0  -3    0.10    0.18
   7   5  -2    3.91    0.22
   3   4  -3  279.03    0.87
   3   9  -2   18.45    0.27
   6   2  -3    3.76    0.24
   7  -4  -2    5.45    0.25
   4   6  -3  149.14    0.76
   5   6  -3   23.16    0.39
   5  10  -2   81.34    0.63
   7   6  -2   13.84    0.36
   5  -5  -3    2.08    0.22
   6   9  -2    6.82    0.28
   7  -5  -2    4.18    0.23
   6   5  -3    0.72    0.28
   4   7  -3   15.65    0.31
   6  -4  -3    7.34    0.32
   7   7  -2   29.86    0.44
   3   6  -3   31.19    0.34
   4  -6  -3  150.18    0.70
   6   6  -3   12.59    0.35
   7  -6  -2   13.45    0.31
   3  -5  -3   10.73    0.22
   5   8  -3    0.12    0.25
   6  -5  -3    0.85    0.20
   6  10  -2    0.35    0.21
   7   1  -3   11.03    0.31
   7   0  -3    0.05    0.17
   7   2  -3    5.65    0.25
   7   8  -2   13.23    0.31
   3   7  -3  275.12    0.90
   7   3  -3    1.56    0.21
   4  -7  -3   16.31    0.30
   7   4  -3   11.26    0.32
   4   0  -4    2.03    0.24
   5   1  -4   21.41    0.41
   6  -6  -3   12.09    0.32
   4   2  -4    0.29    0.23
   5  -1  -4   22.06    0.41
   5   3  -4   17.53    0.38
   5   9  -3    4.34    0.26
   7  -3  -3    2.15    0.22
   4   3  -4    4.30    0.26
   4   9  -3   44.77    0.46
   6   8  -3    5.41    0.28
   5   4  -4   37.62    0.50
   7  -4  -3   11.89    0.30
   7   6  -3   -0.04    0.15
   5  -8  -3    0.43    0.22
   5   5  -4   78.76    0.68
   2   5  -3  354.50    0.88
   6  -2  -4  101.10    0.78
   3   0  -4    0.13    0.16
   3   2  -4   28.92    0.34
   5  10  -3   91.64    0.72
   6   9  -3    1.21    0.21
   3  -1  -4    0.20    0.18
   3   3  -4    0.12    0.19
   5   6  -4   18.28    0.38
   6  -3  -4   54.57    0.59
   7   7  -3    0.11    0.18
   2   6  -3   12.05    0.22
   3   4  -4    0.39    0.17
   7  -6  -3    0.09    0.15
   6   6  -4    1.54    0.21
   7   0  -4   -0.04    0.17
   6  -5  -4   18.52    0.39
   7   2  -4    7.37    0.25
   2   7  -3   24.11    0.28
   3  -4  -4    0.36    0.16
   5   8  -4    0.12    0.20
   6   7  -4   19.14    0.39
   7   3  -4    1.75    0.18
   7   4  -4    0.62    0.16
   6  -6  -4    1.56    0.22
   7  -3  -4    1.63    0.20
   5  -7  -4    9.76    0.30
   6   8  -4   22.93    0.41
   4  -7  -4  171.47    0.80
   4   1  -5    6.52    0.30
   5  -2  -5    2.77    0.30
   2   0  -4  114.97    0.56
   4  -1  -5    6.84    0.30
   6   1  -5   -0.07    0.20
   2   3  -4   63.47    0.44
   4  -2  -5    9.69    0.30
   6  -7  -4   18.65    0.35
   6  -1  -5    0.27    0.19
   6   0  -5   -0.05    0.16
   3  -6  -4  127.25    0.62
   5   5  -5    5.36    0.29
   2  -2  -4  203.85    0.71
   2   4  -4  122.02    0.59
   3   8  -4  101.38    0.60
   4   5  -5  148.03    0.87
   5  -8  -4    0.13    0.20
   5  -4  -5   50.42    0.54
   5   6  -5    1.57    0.29
   5  10  -4   12.86    0.34
   6   5  -5    0.15    0.17
   2   5  -4  200.24    0.75
   3   1  -5    1.64    0.23
   3   2  -5   33.55    0.41
   4   6  -5  108.47    0.75
   4  10  -4  153.91    0.83
   2   9  -3   26.86    0.28
   3  -1  -5    1.49    0.22
   5  -5  -5    5.45    0.28
   6  -4  -5    3.85    0.23
   3  -7  -4  369.43    1.02
   3   9  -4   35.56    0.40
   5   7  -5    0.43    0.22
   6   6  -5   10.39    0.34
   2  -4  -4  122.92    0.55
   3  -2  -5   35.18    0.40
   3   4  -5  159.19    0.80
   5  -6  -5    1.26    0.23
   6  -5  -5    0.79    0.19
   6   7  -5    7.78    0.27
   5   8  -5   14.37    0.35
   2  -5  -4  217.04    0.71
   3  -4  -5  162.05    0.76
   3   6  -5  127.62    0.73
   3  -8  -4   91.40    0.51
   3  10  -4   57.05    0.50
   6  -6  -5    9.62    0.28
   5  -7  -5    0.89    0.24
   5   0  -6    0.10    0.19
   5   1  -6   20.10    0.41
   5   2  -6    2.63    0.23
   5  -1  -6   21.83    0.39
   3  -5  -5  381.89    1.14
   5  -2  -6    3.28    0.26
   2   8  -4   10.12    0.24
   4  -7  -5    4.23    0.25
   4  -1  -6   85.66    0.67
   4   3  -6  452.63    1.53
   4   9  -5   15.16    0.32
   6   0  -6    0.32    0.17
   6   1  -6   27.94    0.44
   2   0  -5    0.12    0.17
   2   1  -5   18.72    0.28
   2   2  -5  152.53    0.68
   4   4  -6   36.07    0.51
   5   5  -6   39.29    0.49
   6  -1  -6   26.41    0.42
   2  -1  -5   18.28    0.27
   2   3  -5  229.26    0.82
   5  -3  -6   48.46    0.53
   3  -6  -5  119.87    0.64
   3   8  -5   33.31    0.40
   2  -2  -5  148.86    0.65
   2   4  -5   85.93    0.53
   5  -4  -6  123.29    0.82
   5   6  -6    9.97    0.29
   3   2  -6    0.17    0.24
   1   3  -4  378.53    0.85
   2  -7  -4    5.48    0.18
   3  -1  -6    0.68    0.24
   5   7  -6    2.84    0.22
   3  -7  -5    6.75    0.23
   5  -5  -6   43.81    0.52
   2   6  -5   59.10    0.49
   3  -2  -6    0.00    0.22
   4  -5  -6    0.28    0.19
   5   8  -6    1.48    0.19
   1   5  -4 1251.26    1.61
   5  -6  -6    9.95    0.27
   2   7  -5   19.92    0.30
   2  -5  -5  244.46    0.80
   4  -6  -6   14.42    0.30
   3  -8  -5   38.36    0.38
   5   0  -7    0.38    0.17
   5   2  -7   21.23    0.37
   5   9  -6    0.22    0.15
   5  -1  -7    0.51    0.17
   5   3  -7    0.12    0.16
   4   0  -7    0.10    0.18
   4   1  -7    1.27    0.21
   4   2  -7   35.15    0.47
   2  -6  -5   61.41    0.42
   2   0  -6    8.27    0.26
   2   1  -6   32.97    0.38
   4  -1  -7    1.30    0.19
   4   3  -7   10.23    0.29
   5   4  -7    4.42    0.21
   2  -1  -6   33.09    0.37
   2   3  -6  166.21    0.75
   4  -2  -7   34.82    0.46
   4   4  -7   13.67    0.30
   1  -5  -4 1376.03    1.53
   1   7  -4    3.24    0.15
   2   4  -6   27.81    0.39
   3   8  -6    0.64    0.18
   5  -3  -7    0.02    0.18
   1   0  -5    1.95    0.18
   2  -2  -6   11.55    0.27
   4   5  -7   18.96    0.35
   1   3  -5  194.73    0.68
   2   9  -5    0.93    0.20
   5   6  -7    0.97    0.15
   2  -7  -5   19.85    0.27
   3   1  -7  113.68    0.70
   4  10  -6    0.02    0.18
   5  -4  -7    4.65    0.20
   1  -2  -5  350.21    0.85
   1   4  -5  284.08    0.79
   3   0  -7   27.97    0.38
   3   2  -7   87.82    0.63
   3   3  -7   20.28    0.35
   4  -4  -7   16.61    0.34
   2   6  -6    3.80    0.31
   3  -1  -7  118.99    0.71
   1   5  -5  102.23    0.53
   2  -4  -6   27.11    0.33
   5  -5  -7   15.51    0.29
   4   7  -7   64.66    0.57
   1  -4  -5  284.64    0.74
   3  -8  -6    0.27    0.19
   4  -6  -7   13.24    0.27
   2   8  -6    2.13    0.17
   1  -7  -4    3.16    0.12
   3  -5  -7    2.63    0.22
   1  -5  -5  120.43    0.52
   2   0  -7    0.30    0.22
   1   0  -6    0.04    0.17
   1   1  -6    4.17    0.20
   1   2  -6  111.51    0.53
   4   0  -8  307.41    1.16
   4   1  -8    1.87    0.17
   4   2  -8  156.33    0.80
   1  -1  -6    3.85    0.19
   2   4  -7    1.60    0.22
   4  -1  -8    1.70    0.17
   4   3  -8    8.29    0.23
   4   4  -8   70.64    0.53
   0   3  -4  120.25    0.39
   1  -2  -6  102.86    0.49
   1   4  -6   24.91    0.29
   1   8  -5   25.60    0.26
   2  -7  -6   71.48    0.44
   1  -6  -5   31.89    0.25
   1  -3  -6  107.65    0.50
   3   2  -8   76.23    0.56
   4  -3  -8    8.11    0.23
   2  -4  -7    1.65    0.21
   3   0  -8    0.01    0.15
   3   9  -7   44.33    0.39
   3  -1  -8  343.79    1.10
   4  -4  -8   69.71    0.46
   4   6  -8   16.78    0.26
   0   5  -4 1454.26    1.29
   1  -4  -6   24.49    0.28
   1   6  -6   78.06    0.43
   3  -2  -8   72.66    0.49
   3   4  -8   23.05    0.30
   1  -7  -5   97.37    0.43
   2  -8  -6    1.87    0.14
   2  -5  -7    0.74    0.15
   4  -5  -8    3.38    0.14
   0   0  -5    0.08    0.12
   0   1  -5   63.65    0.31
   0   2  -5    2.36    0.13
   0   6  -4 1386.07    1.21
   1  -5  -6  111.06    0.47
   3  10  -7    6.05    0.19
   0   3  -5  144.06    0.45
   2   8  -7   64.03    0.42
   3  -8  -7    9.79    0.20
   3  -4  -8   24.72    0.28
   0  -1  -5   62.76    0.31
   1   1  -7   13.28    0.24
   2  -6  -7    3.72    0.16
   1   0  -7  340.63    0.86
   1   2  -7  133.78    0.57
   1   3  -7   12.10    0.27
   2   1  -8    1.57    0.15
   2   2  -8   74.47    0.49
   3   7  -8    1.21    0.13
   0  -2  -5    2.28    0.11
   1  -1  -7   13.02    0.24
   2  -1  -8    1.65    0.16
   2   0  -8  248.06    0.83
   3  -5  -8    0.87    0.13
   1  -2  -7  126.64    0.53
   1   4  -7    0.95    0.17
   2  -2  -8   74.94    0.45
   2   9  -7   51.74    0.36
   2 -11   5    0.34    0.15
   2 -11   6   38.24    0.29
   3  -4   8   18.08    0.23
   3   5   7   29.95    0.28
   3  -2   3    4.33    0.12
   3  -1   3   59.77    0.26
   3   0   3   45.12    0.24
   3   6   6    3.98    0.15
   2 -11   7  112.18    0.49
   2 -10   8    1.25    0.11
   2  -9   3    5.15    0.13
   3  -7   7   20.37    0.24
   3  -6   4   14.48    0.17
   3  -5   8   64.09    0.41
   3   2   3    4.40    0.11
   3   4   8   17.73    0.24
   3   5   4  226.29    0.52
   3  -6   8   12.68    0.22
   3  -4   3  392.20    0.68
   3  -7   4    0.51    0.12
   2 -11   4   73.09    0.33
   3   3   3  109.01    0.34
   2 -12   6   25.07    0.25
   3  -5   3    0.86    0.11
   2 -11   8    0.45    0.10
   3  -9   6   51.87    0.36
   3  -7   8    0.10    0.11
   3   6   4   15.81    0.17
   2 -12   7   31.24    0.28
   2 -10   3    2.93    0.11
   3  -9   5   25.43    0.26
   3  -8   4    4.89    0.18
   3  -9   7  126.48    0.54
   3  -6   3  263.24    0.58
   3   4   3  414.74    0.64
   3 -10   6   20.35    0.25
   4  -3   6   10.19    0.20
   4  -2   6   13.18    0.22
   4  -1   5  152.02    0.57
   2 -12   4    8.09    0.16
   3  -9   4   12.11    0.20
   4  -2   5   13.44    0.22
   3 -10   5    2.06    0.14
   3 -10   7  105.59    0.51
   3  -1   2   48.05    0.23
   3   5   3    0.93    0.10
   4  -4   6    9.55    0.19
   4  -3   5   19.53    0.25
   4  -3   7   40.83    0.34
   4  -2   7    7.98    0.17
   4   0   7    0.06    0.12
   4   1   5  153.73    0.54
   4   2   6   13.59    0.21
   3  -9   8   23.74    0.26
   3  -2   2   95.78    0.32
   3   0   2   -0.02    0.08
   4  -4   5    9.80    0.22
   4   1   7   13.70    0.22
   4   2   5   13.69    0.22
   3  -3   2  707.60    0.84
   4  -5   6    3.91    0.15
   4  -4   7   20.43    0.25
   4   2   7    8.72    0.19
   4   3   6   10.36    0.20
   3  -8   3    5.19    0.15
   4  -5   5    2.98    0.16
   4  -2   4  109.02    0.45
   4  -1   4   52.04    0.32
   3 -11   6    0.92    0.14
   3  -4   2   65.91    0.28
   4  -6   6    8.29    0.18
   4  -5   7    6.95    0.17
   4  -3   4    9.92    0.20
   4   3   5   19.69    0.22
   3 -10   4   46.29    0.30
   4  -6   5    4.43    0.17
   4  -4   4    4.92    0.20
   4  -2   8   11.68    0.21
   4   0   8   50.39    0.37
   4   1   4   52.35    0.32
   4   3   7   46.14    0.34
   4   4   6   10.12    0.21
   3 -11   5   53.49    0.34
   3 -11   7   23.59    0.26
   3  -5   2   57.43    0.26
   4  -6   7    1.39    0.12
   4  -3   8   12.81    0.21
   4   1   8    6.63    0.16
   4  -7   6    2.20    0.13
   4  -4   8    1.33    0.12
   4   2   4  109.22    0.43
   4  -7   5   64.36    0.39
   4   2   8   12.92    0.21
   4   4   7   22.05    0.25
   3  -9   3    0.28    0.10
   3  -6   2  198.32    0.47
   4  -7   7    0.02    0.09
   4  -5   8   12.13    0.20
   4   3   4   10.02    0.17
   4   5   6    4.32    0.17
   4  -8   6   90.98    0.49
   2 -10   2  166.92    0.41
   3 -12   6   11.06    0.18
   3 -11   4   56.00    0.34
   4   5   5    3.55    0.16
   3 -12   5    4.93    0.18
   4  -8   5   60.31    0.39
   4  -8   7   20.22    0.25
   4  -2   3   17.22    0.19
   4  -1   3   97.62    0.39
   3 -12   7    4.11    0.14
   4  -7   4   27.25    0.27
   4  -3   3   77.70    0.37
   4   0   3    0.02    0.11
   4   4   4    5.24    0.15
   4  -4   3  254.97    0.64
   4   1   3   97.69    0.38
   4  -9   5   45.73    0.34
   4  -9   7    1.58    0.11
   4  -5   3  307.16    0.71
   3 -13   6   10.04    0.19
   3 -12   4    2.03    0.15
   3  -8   2   41.18    0.24
   4  -6   3   33.74    0.27
   4 -10   6    3.64    0.15
   4   3   3   79.55    0.34
   2 -11   2   27.58    0.19
   3 -13   5    0.19    0.13
   3 -11   3   20.59    0.20
   4  -9   4   11.74    0.20
   4  -7   3    6.70    0.17
   5  -3   6   25.85    0.27
   5  -2   6   -0.03    0.09
   3  -9   2   27.08    0.20
   3  -3   1  574.55    0.72
   5  -4   6    0.74    0.11
   5  -3   5   41.84    0.34
   5  -2   5  237.30    0.74
   5   0   6    0.11    0.12
   3  -4   1  352.15    0.57
   4 -11   6    5.18    0.16
   5  -4   5   75.88    0.43
   5  -3   7   50.11    0.37
   5  -1   7   42.23    0.33
   5   1   6   38.38    0.32
   4 -10   4   17.06    0.23
   4  -3   2   36.35    0.25
   4  -2   2    0.41    0.10
   4  -1   2   68.69    0.32
   5  -5   6   -0.03    0.09
   5  -4   7   38.39    0.33
   5   0   7   37.24    0.31
   5   1   5    0.31    0.16
   3 -13   4    0.77    0.13
   3  -5   1  104.65    0.33
   4 -11   5   41.52    0.31
   4  -4   2  275.34    0.63
   4   0   2   21.08    0.19
   5  -5   5    5.89    0.17
   5   1   7   45.14    0.34
   5   2   6    0.04    0.13
   5  -6   6   11.35    0.19
   5  -5   7   22.19    0.25
   5  -2   4   79.92    0.43
   3 -12   3   26.08    0.24
   4  -5   2    0.10    0.11
   4   1   2   68.48    0.31
   5  -6   5   29.99    0.29
   5  -3   4   48.72    0.35
   5  -1   4    0.70    0.15
   3 -10   2    1.76    0.11
   4  -9   3    1.81    0.14
   5  -7   6    1.89    0.13
   5  -4   4   27.86    0.28
   5   2   7   76.93    0.45
   5   3   6   27.81    0.27
   4  -6   2    3.34    0.13
   4   2   2    0.30    0.10
   5  -7   5   33.90    0.33
   5  -5   4    0.69    0.12
   5   1   4    0.33    0.13
   5   3   5   42.75    0.32
   4 -12   6    0.62    0.10
   4 -11   4  133.71    0.53
   4 -12   5   16.55    0.22
   5  -6   4    3.26    0.14
   5   2   4   79.96    0.41
   3  -7   1   80.35    0.30
   4  -7   2    6.37    0.15
   5  -8   5    5.43    0.16
   5  -8   6    0.37    0.10
   5   4   6    0.48    0.12
   4   3   2   38.23    0.23
   5  -7   4   29.34    0.28
   5  -3   3  773.46    1.23
   5  -2   3  342.65    0.82
   5  -1   3   24.40    0.25
   5   3   4   48.37    0.32
   3 -11   2   84.06    0.34
   5  -4   3  129.34    0.53
   3  -8   1  128.91    0.38
   4 -12   4   56.98    0.34
   5  -5   3    0.46    0.19
   5   1   3   25.37    0.25
   4 -13   5    6.61    0.16
   4 -11   3   12.53    0.19
   5  -6   3   21.81    0.26
   5   4   4   29.45    0.27
   4  -9   2    4.30    0.14
   5 -10   5   12.75    0.20
   4  -3   1    0.64    0.10
   4  -2   1  467.48    0.77
   5  -7   3   16.35    0.23
   3 -12   2  140.57    0.44
   3  -9   1    5.16    0.12
   4  -4   1   77.12    0.33
   4  -1   1  107.77    0.37
   4 -13   4   25.60    0.25
   4  -5   1  436.84    0.77
   4   0   1   -0.18    0.10
   4   5   2    0.00    0.09
   5   3   3  762.30    1.16
   5   5   4    0.62    0.13
   4 -12   3   26.95    0.27
   5 -10   4    0.81    0.15
   5  -8   3   -0.02    0.14
   4 -10   2    5.78    0.14
   5 -11   5    1.24    0.11
   5  -3   2   78.53    0.40
   5  -2   2   10.98    0.19
   4  -6   1   78.84    0.35
   5  -4   2   11.72    0.21
   5  -1   2    0.97    0.13
   6  -3   5   11.00    0.19
   3 -10   1   11.56    0.15
   5  -5   2  123.48    0.50
   6  -4   5    9.39    0.18
   4   2   1  472.66    0.74
   6  -5   5    7.57    0.16
   6   0   5    0.28    0.12
   3  -4   0    0.06    0.08
   5 -11   4    0.16    0.12
   5  -6   2  208.15    0.65
   5   1   2    1.11    0.13
   4 -11   2   67.20    0.36
   6  -6   5    2.73    0.13
   6  -4   4   52.38    0.38
   6  -2   4   80.36    0.44
   3  -5   0  118.05    0.34
   4 -13   3   30.44    0.27
   5 -12   5    0.76    0.10
   5  -7   2   24.68    0.26
   5   2   2   10.31    0.18
   6   0   4    0.41    0.15
   4  -8   1    8.60    0.15
   4   3   1    0.44    0.10
   5 -10   3    5.16    0.16
   5   5   3    0.42    0.13
   6  -7   5    0.13    0.09
   6   2   5   78.09    0.43
   6  -6   4    2.81    0.12
   6   1   4  166.88    0.62
   3 -11   1   15.75    0.17
   5  -8   2   11.10    0.20
   5 -12   4    5.48    0.15
   5   3   2   77.29    0.37
   6  -8   5    0.56    0.09
   6  -7   4    7.91    0.17
   4 -12   2   10.34    0.19
   4  -9   1    8.15    0.15
   5 -11   3   19.37    0.24
   6  -3   3   72.08    0.42
   6  -2   3    4.15    0.17
   6   2   4   84.71    0.44
   3  -7   0   32.18    0.20
   4   4   1   79.19    0.31
   6  -4   3  256.05    0.78
   5  -9   2    0.00    0.12
   6  -8   4   -0.07    0.10
   6  -5   3   94.36    0.49
   6   0   3    0.04    0.13
   5  -4   1   19.06    0.23
   5  -3   1    1.30    0.14
   5  -2   1   51.67    0.32
   5   4   2   11.42    0.18
   6  -6   3   21.23    0.25
   6   3   4    8.39    0.19
   4 -10   1    5.63    0.15
   5  -1   1   12.09    0.19
   6   1   3    6.48    0.17
   3  -8   0   56.69    0.25
   5 -13   4   27.11    0.25
   5  -5   1  630.65    1.07
   6  -7   3   12.26    0.21
   4  -4   0    7.27    0.13
   4  -3   0    3.46    0.09
   4  -2   0   53.52    0.27
   5 -12   3   14.54    0.21
   5 -10   2    0.20    0.12
   5  -6   1  746.97    1.18
   4 -13   2   46.75    0.30
   4  -5   0   21.98    0.19
   4  -1   0   67.47    0.30
   5   1   1   11.99    0.20
   6   2   3    4.15    0.14
   4   0   0   15.65    0.17
   4   5   1  440.89    0.70
   5  -7   1  278.00    0.74
   5   5   2  122.46    0.45
   6 -10   4    4.96    0.13
   6  -3   2    4.94    0.16
   6  -2   2   44.78    0.35
   3  -9   0   38.11    0.22
   4 -11   1    6.38    0.14
   5 -11   2    7.75    0.18
   5   2   1   52.14    0.31
   6  -5   2  212.02    0.71
   6  -1   2    3.53    0.17
   6   3   3   73.43    0.41
   5 -13   3   26.43    0.26
   6  -6   2   28.41    0.28
   6   0   2   53.95    0.36
   4   2   0   53.59    0.26
   5   3   1    1.32    0.10
   6  -7   2    8.31    0.18
   6   1   2    3.70    0.15
   3 -10   0    0.42    0.09
   4  -8   0   26.55    0.22
   5  -9   1   11.10    0.19
   6 -10   3    2.02    0.13
   4 -12   1   13.77    0.19
   5 -12   2   67.53    0.38
   6   2   2   45.15    0.34
   6  -8   2   79.77    0.46
   4  -9   0    0.21    0.10
   4   3   0    3.78    0.11
   5 -10   1   63.54    0.37
   5  -3   0   23.79    0.24
   5   4   1   20.35    0.21
   5  -4   0   21.08    0.23
   5  -2   0    1.68    0.13
   6 -11   3    0.13    0.10
   6   3   2    5.93    0.15
   5  -5   0    1.83    0.15
   5  -1   0   21.49    0.22
   6  -4   1    0.05    0.11
   6  -3   1    2.84    0.15
   6  -2   1   74.09    0.42
   3 -11   0  220.70    0.51
   3  -4  -1   37.57    0.20
   3  -3  -1  179.06    0.41
   5 -13   2  320.16    0.81
   5  -6   0  304.40    0.76
   5   0   0    0.05    0.11
   6  -5   1    0.19    0.11
   6  -1   1    0.61    0.15
   3  -5  -1    1.80    0.08
   4 -13   1    0.31    0.12
   4 -10   0   79.36    0.37
   5 -11   1   43.84    0.33
   6 -10   2   -0.11    0.11
   6  -6   1   30.60    0.29
   7  -4   3   20.32    0.25
   7  -3   3   14.80    0.22
   5  -7   0    5.94    0.17
   5   5   1  649.59    1.01
   6   4   2   94.81    0.46
   7  -5   3    3.56    0.13
   7  -1   3   13.45    0.21
   6 -12   3   33.88    0.29
   6  -7   1  130.32    0.57
   7  -6   3    0.99    0.09
   6   1   1    0.51    0.13
   3  -7  -1   34.07    0.21
   4 -11   0  576.58    0.97
   4  -4  -1    2.76    0.11
   4  -3  -1   32.07    0.23
   5   2   0    1.80    0.12
   6 -11   2   19.06    0.24
   6  -8   1   36.20    0.32
   7   1   3   13.38    0.20
   4  -5  -1    0.68    0.10
   4  -2  -1  112.81    0.40
   5 -12   1    3.92    0.14
   6   2   1   72.44    0.41
   4  -1  -1   32.66    0.23
   5  -9   0    3.34    0.14
   7  -4   2   18.04    0.24
   7  -2   2    8.34    0.18
   4  -6  -1   89.16    0.37
   4   5   0   22.03    0.19
   7  -5   2   60.40    0.41
   7  -1   2    4.27    0.16
   7   2   3   12.41    0.20
   3  -8  -1    5.69    0.12
   4   0  -1    0.04    0.10
   5   3   0   23.19    0.22
   6   3   1    2.54    0.14
   7  -6   2    8.81    0.18
   6 -12   2   97.93    0.49
   7   0   2   -0.10    0.11
   5 -10   0  680.66    1.20
   6 -10   1    1.54    0.15
   6  -3   0  192.41    0.69
   7  -7   2   -0.07    0.09
   4 -12   0  287.42    0.70
   5 -13   1  143.64    0.56
   6  -5   0    0.00    0.11
   6  -4   0   58.95    0.40
   6  -2   0   34.75    0.32
   3  -9  -1  135.68    0.42
   6  -1   0    0.53    0.15
   5   4   0   21.37    0.21
   6   4   1    0.08    0.14
   7  -8   2    5.14    0.15
   4   2  -1  110.64    0.39
   5  -5  -1   76.78    0.42
   5  -4  -1   49.83    0.34
   5  -3  -1    3.38    0.16
   5  -2  -1    5.45    0.16
   7   2   2    8.99    0.19
   4   6   0   54.70    0.27
   5  -1  -1   30.00    0.27
   6 -13   2    0.38    0.10
   6 -11   1   49.03    0.37
   4  -9  -1  293.52    0.71
   5  -6  -1    1.31    0.15
   6   1   0    0.69    0.14
   7  -5   1   27.88    0.30
   7  -4   1   14.05    0.22
   7  -3   1    5.58    0.16
   5   0  -1   19.81    0.23
   6  -8   0   79.69    0.46
   3 -10  -1    0.13    0.08
   5  -7  -1    1.83    0.15
   6   5   1    0.05    0.14
   7  -6   1    3.00    0.13
   7   3   2   39.10    0.33
   4   3  -1   31.13    0.22
   5   5   0    1.80    0.12
   6   2   0   33.31    0.30
   7  -7   1    0.15    0.10
   7   0   1    1.22    0.11
   4 -10  -1   99.53    0.43
   5 -12   0   15.54    0.22
   6 -12   1   13.17    0.21
   6  -9   0    0.50    0.13
   7   1   1    0.35    0.13
   7  -8   1    3.61    0.14
   5  -9  -1  860.61    1.39
   5   2  -1    6.01    0.16
   6   3   0  197.49    0.69
   3 -11  -1    0.70    0.09
   7   2   1   10.56    0.21
   4 -11  -1   41.64    0.30
   4   4  -1    2.57    0.12
   5 -13   0   12.65    0.23
   5   6   0  305.36    0.73
   6  -5  -1   12.15    0.22
   6  -4  -1    0.77    0.13
   6  -3  -1    1.52    0.15
   6  -2  -1   24.13    0.29
   3  -4  -2   81.45    0.33
   3  -3  -2   22.59    0.19
   4  -4  -2    4.58    0.14
   4  -3  -2    4.18    0.13
   5   3  -1    3.19    0.14
   6  -6  -1    6.99    0.20
   6  -1  -1   13.21    0.26
   6   4   0   61.23    0.41
   7  -3   0    8.59    0.19
   3  -5  -2    8.03    0.13
   3  -2  -2    4.77    0.12
   4  -5  -2   98.08    0.42
   4  -2  -2   10.78    0.17
   6 -11   0   17.84    0.25
   7  -5   0   39.76    0.37
   7  -2   0   40.57    0.36
   3  -6  -2   47.50    0.27
   3  -1  -2  124.28    0.40
   4  -6  -2   27.85    0.26
   4  -1  -2    2.10    0.12
   6  -7  -1    0.06    0.13
   7  -6   0    7.68    0.19
   4 -12  -1   64.79    0.38
   4   5  -1    0.64    0.11
   7  -7   0    8.23    0.20
   7   0   0   -0.05    0.11
   3  -7  -2    3.38    0.11
   3   0  -2    0.28    0.10
   5 -11  -1  210.56    0.71
   5   4  -1   52.53    0.34
   6   1  -1   12.42    0.23
   5  -4  -2   32.68    0.31
   5  -3  -2    6.99    0.20
   6 -12   0    9.81    0.20
   6   5   0    0.22    0.16
   7  -8   0    0.05    0.11
   7   1   0   55.91    0.42
   4  -8  -2 1326.27    1.61
   4   1  -2    2.10    0.13
   5  -5  -2   57.53    0.40
   5  -2  -2   49.14    0.37
   6  -9  -1   12.95    0.25
   5  -6  -2  230.78    0.77
   6   2  -1   24.72    0.29
   3   1  -2  124.48    0.39
   5  -7  -2  114.34    0.56
   5   0  -2    0.02    0.14
   5   5  -1   80.40    0.42
   6 -10  -1    2.60    0.16
   6   3  -1    1.68    0.17
   3  -9  -2   19.60    0.20
   5  -8  -2  151.91    0.65
   6 -13   0    4.51    0.16
   4   6  -1   92.51    0.39
   7  -4  -1    5.13    0.19
   7  -3  -1    0.52    0.14
   7   3   0    8.84    0.21
   7  -5  -1    0.56    0.12
   7  -2  -1    2.72    0.14
   4 -10  -2   17.17    0.23
   5  -9  -2  156.67    0.66
   6 -11  -1  101.87    0.57
   6  -3  -2    5.92    0.19
   7  -6  -1    0.77    0.12
   4   3  -2    4.44    0.15
   5 -13  -1    5.20    0.18
   5   2  -2   48.60    0.37
   6  -5  -2    3.90    0.17
   6  -2  -2    1.91    0.17
   6   4  -1    1.10    0.16
   3 -10  -2   72.97    0.36
   6  -6  -2    0.40    0.13
   7  -7  -1   78.41    0.54
   3   3  -2   22.83    0.20
   5   6  -1    1.43    0.15
   7   4   0   38.40    0.37
   5 -10  -2   80.54    0.50
   6   0  -2  562.50    1.35
   7  -8  -1    0.80    0.13
   4 -11  -2  162.86    0.63
   5   3  -2    7.10    0.19
   4   4  -2    4.51    0.15
   6   1  -2    1.44    0.21
   6   5  -1   14.08    0.26
   7  -9  -1    5.57    0.18
   3 -11  -2  165.38    0.55
   4  -4  -3    1.53    0.15
   4  -3  -3    5.80    0.17
   5 -11  -2    0.38    0.12
   6  -9  -2    7.29    0.24
   7   2  -1    3.17    0.19
   5   4  -2   32.81    0.32
   6   2  -2    1.92    0.21
   3   4  -2   85.37    0.36
   4 -12  -2    1.22    0.16
   3  -4  -3  298.73    0.74
   5  -5  -3    2.05    0.20
   5  -3  -3    3.67    0.21
   6 -13  -1    2.02    0.14
   3  -5  -3   11.28    0.20
   4  -7  -3   17.27    0.26
   6 -10  -2    0.36    0.17
   7   3  -1    0.48    0.16
   3  -6  -3   31.99    0.29
   5 -12  -2  167.17    0.74
   6   3  -2    6.22    0.23
   7  -5  -2    3.99    0.19
   7  -4  -2    5.40    0.19
   7  -3  -2   67.82    0.54
   3  -1  -3    0.14    0.12
   4  -8  -3   53.29    0.41
   7  -6  -2   14.03    0.28
   7  -2  -2    4.82    0.19
   4   1  -3    7.58    0.19
   5  -8  -3    0.19    0.18
   6 -11  -2    0.38    0.15
   7  -7  -2   32.80    0.39
   3   0  -3  142.71    0.53
   4  -9  -3   46.45    0.40
   6  -4  -3    7.04    0.25
   6  -3  -3   20.97    0.36
   7   0  -2    0.01    0.14
   3  -8  -3  122.28    0.53
   6  -5  -3    1.32    0.17
   6  -2  -3    3.83    0.20
   6   4  -2   12.19    0.25
   5  -9  -3    4.75    0.20
   6  -1  -3   17.75    0.34
   3   1  -3    0.40    0.14
   4   6  -2   28.80    0.28
   6  -7  -3    7.85    0.26
   4 -10  -3  473.12    1.20
   6 -12  -2    1.03    0.15
   6   0  -3   -0.05    0.19
   3  -9  -3   64.58    0.41
   5 -10  -3  100.81    0.63
   3   2  -3  318.98    0.81
   5   3  -3    3.37    0.21
   2  -5  -3  391.12    0.81
   2  -6  -3   12.01    0.23
   4 -11  -3  545.94    1.32
   6  -9  -3    1.09    0.17
   3 -10  -3   62.03    0.41
   5 -11  -3  279.54    1.03
   4   4  -3    1.36    0.15
   7  -4  -3   12.77    0.30
   2  -7  -3   26.66    0.25
   3   3  -3  561.22    1.11
   5   4  -3    2.60    0.20
   6 -10  -3    0.24    0.17
   7  -5  -3   10.90    0.28
   7  -3  -3    1.76    0.19
   7  -2  -3    5.83    0.24
   4  -4  -4  143.43    0.72
   4  -3  -4    4.24    0.24
   4  -2  -4    0.56    0.20
   5  -4  -4   38.16    0.45
   5  -3  -4   17.25    0.34
   7  -6  -3    0.31    0.15
   7  -1  -3   11.54    0.29
   5  -2  -4  162.90    0.87
   7   4  -2    5.49    0.26
   2  -8  -3    0.30    0.14
   4  -1  -4    9.34    0.27
   5 -12  -3   53.26    0.52
   5  -1  -4   24.47    0.41
   7  -7  -3   -0.04    0.15
   4  -7  -4  194.78    0.88
   6 -11  -3   24.22    0.37
   4   0  -4    2.26    0.22
   5   0  -4    0.11    0.24
   3  -4  -4    0.26    0.18
   3   4  -3  293.87    0.83
   4  -8  -4  116.01    0.71
   5  -8  -4    0.21    0.25
   6  -4  -4   20.29    0.40
   6  -3  -4   52.12    0.58
   6   4  -3    7.33    0.27
   4   1  -4    9.25    0.27
   5   1  -4   24.40    0.41
   2  -9  -3   27.37    0.27
   3  -6  -4  136.47    0.67
   6  -1  -4   24.21    0.41
   3  -1  -4    0.42    0.17
   5  -9  -4   17.44    0.37
   7   2  -3    6.00    0.26
   3  -7  -4  376.91    1.11
   4  -9  -4   44.86    0.47
   6   0  -4    7.25    0.29
   3   0  -4   -0.07    0.17
   4   2  -4    0.47    0.21
   6   5  -3    0.60    0.24
   3   5  -3   10.99    0.26
   4   6  -3  153.94    0.72
   5   6  -3   23.47    0.36
   6  -8  -4   26.53    0.42
   3  -8  -4   91.56    0.58
   4 -10  -4  159.82    0.87
   5 -10  -4   14.02    0.34
   7   3  -3    1.54    0.20
   3   1  -4    0.24    0.19
   4   3  -4    4.57    0.30
   5   3  -4   17.18    0.36
   6  -9  -4    9.87    0.30
   6   2  -4  107.21    0.80
   3  -9  -4   34.51    0.41
   7  -3  -4    1.79    0.20
   3   2  -4   29.61    0.36
   7  -2  -4    8.86    0.29
   4 -11  -4   27.26    0.45
   5 -11  -4    0.21    0.23
   5   4  -4   37.72    0.52
   6 -10  -4   -0.21    0.18
   6   6  -3   13.13    0.35
   7  -1  -4    2.69    0.22
   6   3  -4   50.94    0.61
   2  -3  -4   64.73    0.48
   3   6  -3   30.22    0.34
   2  -5  -4  197.11    0.77
   2  -2  -4  196.91    0.77
   4  -4  -5   18.28    0.42
   4  -3  -5   14.23    0.39
   5  -2  -5    2.46    0.25
  -3 -11   2  164.62    0.42
  -3 -10   7    5.60    0.15
  -2 -11   3    0.12    0.12
  -2 -11   5    1.90    0.17
[truncated: 23,223 more chars]
