# Supplementary material for: Positional Isomerism in the N^N Ligand: How Much Difference Does a Methyl Group Make in [Cu(P^P)(N^N)]+ Complexes?
Source: Molecules. 2020 Jun 15;25(12):2760. doi: 10.3390/molecules25122760 (PMC7356218; doi:10.3390/molecules25122760)
Supplement: Supplementary file 1 [file molecules-25-02760-s001.zip › BRF213_130K.cif]

data_BRF213_130K
_audit_creation_date        "2019-01-17"
_audit_creation_method 'CRYSTALS_ver_14.61_build_7264 '

_oxford_structure_analysis_title  'BRF213_130K_0m in P2(1)/c'
_chemical_name_systematic         .
_chemical_melting_point           'not measured'
#looking for refcif 
 
 
_publ_contact_author_name         'Alessandro Prescimone' 
_publ_contact_author_address      'University of Basel' 
_publ_contact_author_email        'alessandro.prescimone@unibas.ch' 
_chemical_compound_source         'Fabian Brunner'


_exptl_crystal_recrystallization_method 
; 
Acetone
; 
 
_refine_special_details 
; 
? 
; 
 
 
_publ_section_exptl_refinement 
; 
The H atoms were all positioned geometrically. 
U~iso~(H) (in the range 1.2 times U~eq~ of the parent atom), 
 
see the bottom part of the file for the full list of the applied restraints. 
 
--------------------------------------------------------------------------------
CHECKCIF OUTPUT: 
--------------------------------------------------------------------------------
 
; 
#end of refcif 
_cell_length_a                    9.5613(9)
_cell_length_b                    14.8515(13)
_cell_length_c                    32.472(3)
_cell_angle_alpha                 90
_cell_angle_beta                  90.338(4)
_cell_angle_gamma                 90
_cell_volume                      4611.0(7)
 
_symmetry_cell_setting            'monoclinic' 
_symmetry_space_group_name_H-M    'P 1 21/c 1 ' 
_symmetry_space_group_name_Hall   '-P 2ybc'
loop_
 _symmetry_equiv_pos_as_xyz
 'x,y,z'
 '-x,-y,-z'
 '-x,y+1/2,-z+1/2'
 'x,-y+1/2,z+1/2'

loop_
_atom_type_symbol
_atom_type_scat_dispersion_real
_atom_type_scat_dispersion_imag
_atom_type_scat_Cromer_Mann_a1
_atom_type_scat_Cromer_Mann_b1
_atom_type_scat_Cromer_Mann_a2
_atom_type_scat_Cromer_Mann_b2
_atom_type_scat_Cromer_Mann_a3
_atom_type_scat_Cromer_Mann_b3
_atom_type_scat_Cromer_Mann_a4
_atom_type_scat_Cromer_Mann_b4
_atom_type_scat_Cromer_Mann_c
_atom_type_scat_source  
 C       0.0181   0.0091   2.3100  20.8439   1.0200  10.2075   1.5886   0.5687
   0.8650  51.6512   0.2156 'International Tables Vol C 4.2.6.8 and 6.1.1.4'
 H       0.0000   0.0000   0.4930  10.5109   0.3229  26.1257   0.1402   3.1424
   0.0408  57.7998   0.0030 'International Tables Vol C 4.2.6.8 and 6.1.1.4'
 N       0.0311   0.0180  12.2126   0.0057   3.1322   9.8933   2.0125  28.9975
   1.1663   0.5826 -11.5290 'International Tables Vol C 4.2.6.8 and 6.1.1.4'
 O       0.0492   0.0322   3.0485  13.2771   2.2868   5.7011   1.5463   0.3239
   0.8670  32.9089   0.2508 'International Tables Vol C 4.2.6.8 and 6.1.1.4'
 F       0.0727   0.0534   3.5392  10.2825   2.6412   4.2944   1.5170   0.2615
   1.0243  26.1476   0.2776 'International Tables Vol C 4.2.6.8 and 6.1.1.4'
 P       0.2955   0.4335   6.4345   1.9067   4.1791  27.1570   1.7800   0.5260
   1.4908  68.1645   1.1149 'International Tables Vol C 4.2.6.8 and 6.1.1.4'
 Cu     -1.9646   0.5888  13.3380   3.5828   7.1676   0.2470   5.6158  11.3966
   1.6735  64.8126   1.1910 'International Tables Vol C 4.2.6.8 and 6.1.1.4'
 
 
_cell_formula_units_Z                    4

# Given Formula = C48 H40 Cu1 F6 N2 O1 P3 
# Dc =      1.34 Fooo =   1912.00 Mu =     21.76 M =    931.31
# Found Formula = C51 H46 Cu1 F6 N2 O2 P3 
# Dc =      1.43 FOOO =   2040.00 Mu =     22.27 M =    989.39

_chemical_formula_sum             'C51 H46 Cu1 F6 N2 O2 P3'
_chemical_formula_moiety          'C51 H46 Cu1 F6 N2 O2 P3'
_chemical_formula_weight            989.39
 
 
_cell_measurement_temperature    130(2)
_cell_measurement_reflns_used      9944
_cell_measurement_theta_min        3.27
_cell_measurement_theta_max       68.97

_exptl_crystal_description       'needle'
_exptl_crystal_colour            'orange'
_exptl_crystal_size_min          0.10
_exptl_crystal_size_mid          0.11
_exptl_crystal_size_max          0.28
 
_exptl_crystal_density_diffrn     1.425 
_exptl_crystal_density_meas       'not measured' 
_exptl_crystal_density_method     'not measured' 
# Non-dispersive F(000): 
_exptl_crystal_F_000              2040 
_exptl_absorpt_coefficient_mu     2.227 
 
# Sheldrick geometric approximatio 1.00 1.00 
# No experimental values of Tmin/max available 
_exptl_absorpt_correction_type    multi-scan 
_exptl_absorpt_process_details    'SADABS (Siemens, 1996)' 
_exptl_absorpt_correction_T_min   0.6389 
_exptl_absorpt_correction_T_max   0.7532 
_diffrn_measurement_device_type   'Bruker Kappa Apex2' 
_diffrn_measurement_device        'Area' 
_diffrn_radiation_monochromator   'graphite' 
_diffrn_radiation_type            'Cu K\a'
_diffrn_radiation_wavelength           1.54178
_diffrn_measurement_method        '\f & \w scans' 
 
# If a reference occurs more than once, delete the author 
# and date from subsequent references. 
_computing_data_collection        'Apex2 (Bruker AXS, 2006)' 
_computing_cell_refinement        'Apex2 (Bruker AXS, 2006)' 
_computing_data_reduction         'Apex2 (Bruker AXS, 2006)' 
_computing_structure_solution     'Superflip (Palatinus & Chapuis, 2007)' 
_computing_structure_refinement   'CRYSTALS (Betteridge et al., 2003)' 
_computing_publication_material   'CRYSTALS (Betteridge et al., 2003)' 
_computing_molecular_graphics     'CAMERON (Watkin et al., 1996)' 
 
_diffrn_standards_interval_time   . 
_diffrn_standards_interval_count  . 
_diffrn_standards_number          0 
_diffrn_standards_decay_%         . 
 
_diffrn_ambient_temperature        130
_diffrn_reflns_number             31246 
_diffrn_reflns_av_unetI/netI      0.042 
_reflns_number_total              8211 
_diffrn_reflns_av_R_equivalents   0.029 
# Number of reflections without Friedels Law is 0 
# Number of reflections with Friedels Law is 8211 
# Theoretical number of reflections is about 17141 
 
 
_diffrn_reflns_theta_min          4.034 
_diffrn_reflns_theta_max          68.966 
_diffrn_measured_fraction_theta_max 0.958 
 
_diffrn_reflns_theta_full         68.000 
_diffrn_measured_fraction_theta_full 0.975 
 
 
_diffrn_reflns_limit_h_min        -10 
_diffrn_reflns_limit_h_max        11 
_diffrn_reflns_limit_k_min        -15 
_diffrn_reflns_limit_k_max        17 
_diffrn_reflns_limit_l_min        -31 
_diffrn_reflns_limit_l_max        38 
_reflns_limit_h_min               -11 
_reflns_limit_h_max               11 
_reflns_limit_k_min               0 
_reflns_limit_k_max               17 
_reflns_limit_l_min               0 
_reflns_limit_l_max               38 
 
_oxford_diffrn_Wilson_B_factor    1.73 
_oxford_diffrn_Wilson_scale       152.25 
 
_atom_sites_solution_primary      other  #heavy,direct,difmap,geom,iterative
# _atom_sites_solution_secondary  difmap
_atom_sites_solution_hydrogens    difmap
 
_refine_diff_density_min          -0.58 
_refine_diff_density_max          0.62 
 
 
# The current dictionary definitions do not cover the 
# situation where the reflections used for refinement were 
# selected by a user-defined sigma threshold 
 
 
# The values actually used during refinement 
_oxford_refine_reflns_threshold_expression_ref   I>-3.0\s(I)
_refine_ls_number_restraints      0 
_refine_ls_number_parameters      586 
_refine_ls_number_reflns          8211 
_oxford_refine_ls_R_factor_ref    0.0420 
_refine_ls_wR_factor_ref          0.0536 
_refine_ls_goodness_of_fit_ref    0.9967 
_refine_ls_shift/su_max           0.0021910 
_refine_ls_shift/su_mean          0.0000623 
 
 
# The values computed with all filters except I/sigma 
_oxford_reflns_number_all         8211 
_refine_ls_R_factor_all           0.0420 
_refine_ls_wR_factor_all          0.0536 
 
# The values computed with a 2 sigma cutoff - a la SHELX 
_reflns_threshold_expression                I>2.0\s(I)
_reflns_number_gt                 7611 
_refine_ls_R_factor_gt            0.0392 
_refine_ls_wR_factor_gt           0.0529 
 
 
_refine_ls_structure_factor_coef  Fsqd 
_refine_ls_matrix_type            full
_refine_ls_hydrogen_treatment     constr         #undef, noref, refall,
                                                 # refxyz, refU, constr or mixed
_refine_ls_weighting_scheme       calc 
_refine_ls_weighting_details 
;
 Method, part 1, Chebychev polynomial, (Watkin, 1994, Prince, 1982) 
 [weight] = 1.0/[A~0~*T~0~(x)+A~1~*T~1~(x) ... +A~n-1~]*T~n-1~(x)] 
 where A~i~ are the Chebychev coefficients listed below and x= Fcalc/Fmax 
 Method = Robust Weighting (Prince, 1982) 
 W = [weight] * [1-(deltaF/6*sigmaF)^2^]^2^ 
 A~i~ are: 
 0.746 0.580 0.555E-01 
;
# Insert your own references if required - in alphabetical order 
_publ_section_references 
; 
Betteridge, P.W., Carruthers, J.R., Cooper, R.I., 
Prout, K. & Watkin, D.J. (2003). J. Appl. Cryst. 36, 1487. 
 
Bruker Analytical X-ray Systems, Inc., 2006. <i>Apex2</i>, 
Version 2 User Manual, M86-E01078, Madison, WI. 
 
Palatinus, L. & Chapuis, G. (2007). J. Appl. Cryst. 40, 786-790. 
 
Prince, E. 
Mathematical Techniques in Crystallography 
and Materials Science 
Springer-Verlag, New York, 1982. 
 
Siemens Industrial Automation, Inc (1996). 
SADABS: Area-Detector Absorption Correction;: Madison, WI. 
 
Watkin D.J. (1994). 
Acta Cryst, A50, 411-437. 
 
Watkin, D.J., Prout, C.K. & Pearce, L.J. (1996). CAMERON, Chemical 
Crystallography Laboratory, Oxford, UK. 
; 

# Uequiv = arithmetic mean of Ui i.e. Ueqiv = (U1+U2+U3)/3

# Replace last . with number of unfound hydrogen atoms attached to an atom.

# ..._refinement_flags_... 
# . no refinement constraints           S special position constraint on site
# G rigid group refinement of site      R riding atom
# D distance or angle restraint on site T thermal displacement constraints
# U Uiso or Uij restraint (rigid bond)  P partial occupancy constraint


loop_
_atom_site_label
_atom_site_type_symbol
_atom_site_fract_x
_atom_site_fract_y
_atom_site_fract_z
_atom_site_U_iso_or_equiv
_atom_site_occupancy
_atom_site_adp_type
_atom_site_refinement_flags_posn
_atom_site_refinement_flags_adp
_atom_site_refinement_flags_occupancy
_atom_site_disorder_assembly
_atom_site_disorder_group
_atom_site_attached_hydrogens
Cu1 Cu 0.54128(3) 0.26500(2) 0.645879(11) 0.0191 1.0000 Uani . . . . . . 
P2 P 0.56475(6) 0.34865(4) 0.703336(18) 0.0172 1.0000 Uani . . . . . . 
C3 C 0.3892(2) 0.37736(15) 0.72200(7) 0.0181 1.0000 Uani . . . . . . 
C4 C 0.2926(2) 0.41301(16) 0.69409(7) 0.0192 1.0000 Uani . . . . . . 
O1 O 0.34501(16) 0.43687(11) 0.65577(5) 0.0207 1.0000 Uani . . . . . . 
C6 C 0.2556(2) 0.43148(17) 0.62171(7) 0.0208 1.0000 Uani . . . . . . 
C7 C 0.2336(2) 0.34819(17) 0.60297(7) 0.0215 1.0000 Uani . . . . . . 
P1 P 0.31296(6) 0.24636(4) 0.625227(19) 0.0195 1.0000 Uani . . . . . . 
C9 C 0.1806(2) 0.20871(16) 0.66200(7) 0.0211 1.0000 Uani . . . . . . 
C10 C 0.0382(2) 0.22560(18) 0.65633(8) 0.0265 1.0000 Uani . . . . . . 
C11 C -0.0582(3) 0.19419(19) 0.68487(8) 0.0309 1.0000 Uani . . . . . . 
C12 C -0.0146(3) 0.14454(19) 0.71826(8) 0.0329 1.0000 Uani . . . . . . 
C13 C 0.1266(3) 0.1277(2) 0.72432(9) 0.0355 1.0000 Uani . . . . . . 
C14 C 0.2231(3) 0.16114(18) 0.69652(8) 0.0289 1.0000 Uani . . . . . . 
C15 C 0.2983(3) 0.16698(17) 0.58294(8) 0.0235 1.0000 Uani . . . . . . 
C16 C 0.3848(3) 0.1813(2) 0.54854(8) 0.0337 1.0000 Uani . . . . . . 
C17 C 0.3841(3) 0.1221(2) 0.51588(9) 0.0426 1.0000 Uani . . . . . . 
C18 C 0.2976(3) 0.0494(2) 0.51597(9) 0.0442 1.0000 Uani . . . . . . 
C19 C 0.2104(3) 0.0346(2) 0.54896(10) 0.0413 1.0000 Uani . . . . . . 
C20 C 0.2110(3) 0.09271(18) 0.58235(9) 0.0313 1.0000 Uani . . . . . . 
C21 C 0.1508(3) 0.34689(18) 0.56749(8) 0.0263 1.0000 Uani . . . . . . 
C22 C 0.0910(3) 0.42496(18) 0.55214(8) 0.0281 1.0000 Uani . . . . . . 
C23 C 0.1140(3) 0.50649(18) 0.57151(8) 0.0264 1.0000 Uani . . . . . . 
C24 C 0.1982(3) 0.50959(17) 0.60638(8) 0.0238 1.0000 Uani . . . . . . 
C25 C 0.1547(3) 0.42603(17) 0.70462(8) 0.0253 1.0000 Uani . . . . . . 
C26 C 0.1106(3) 0.40219(18) 0.74372(8) 0.0295 1.0000 Uani . . . . . . 
C27 C 0.2033(3) 0.36721(18) 0.77187(8) 0.0269 1.0000 Uani . . . . . . 
C28 C 0.3430(2) 0.35568(17) 0.76127(7) 0.0219 1.0000 Uani . . . . . . 
C29 C 0.6565(2) 0.31446(16) 0.75056(7) 0.0205 1.0000 Uani . . . . . . 
C30 C 0.6587(3) 0.22458(18) 0.76150(8) 0.0265 1.0000 Uani . . . . . . 
C31 C 0.7261(3) 0.19562(19) 0.79695(8) 0.0332 1.0000 Uani . . . . . . 
C32 C 0.7950(3) 0.2574(2) 0.82180(8) 0.0350 1.0000 Uani . . . . . . 
C33 C 0.7932(3) 0.3475(2) 0.81115(8) 0.0343 1.0000 Uani . . . . . . 
C34 C 0.7241(3) 0.37644(19) 0.77606(8) 0.0284 1.0000 Uani . . . . . . 
C35 C 0.6444(2) 0.45755(17) 0.69148(7) 0.0201 1.0000 Uani . . . . . . 
C36 C 0.7708(2) 0.45826(18) 0.66957(7) 0.0228 1.0000 Uani . . . . . . 
C37 C 0.8291(3) 0.53848(19) 0.65722(8) 0.0278 1.0000 Uani . . . . . . 
C38 C 0.7650(3) 0.61869(18) 0.66610(8) 0.0306 1.0000 Uani . . . . . . 
C39 C 0.6408(3) 0.61899(18) 0.68808(9) 0.0321 1.0000 Uani . . . . . . 
C40 C 0.5835(2) 0.53897(17) 0.70089(8) 0.0240 1.0000 Uani . . . . . . 
N2 N 0.6598(2) 0.15872(14) 0.62246(6) 0.0222 1.0000 Uani . . . . . . 
C42 C 0.7323(2) 0.18028(17) 0.58835(8) 0.0238 1.0000 Uani . . . . . . 
C43 C 0.7107(2) 0.27258(18) 0.57206(7) 0.0233 1.0000 Uani . . . . . . 
N1 N 0.6343(2) 0.32856(13) 0.59617(6) 0.0208 1.0000 Uani . . . . . . 
C45 C 0.6113(3) 0.41258(17) 0.58298(8) 0.0256 1.0000 Uani . . . . . . 
C46 C 0.6591(3) 0.44613(19) 0.54567(8) 0.0297 1.0000 Uani . . . . . . 
C47 C 0.6339(3) 0.5426(2) 0.53387(9) 0.0421 1.0000 Uani . . . . . . 
C48 C 0.7313(3) 0.3870(2) 0.52121(9) 0.0367 1.0000 Uani . . . . . . 
C49 C 0.7585(3) 0.3005(2) 0.53426(8) 0.0340 1.0000 Uani . . . . . . 
C50 C 0.8212(3) 0.11897(19) 0.56940(8) 0.0307 1.0000 Uani . . . . . . 
C51 C 0.8331(3) 0.03328(19) 0.58510(9) 0.0336 1.0000 Uani . . . . . . 
C52 C 0.7564(3) 0.01045(19) 0.61919(9) 0.0343 1.0000 Uani . . . . . . 
C53 C 0.6711(3) 0.07444(17) 0.63766(8) 0.0282 1.0000 Uani . . . . . . 
C54 C 0.5908(3) 0.0519(2) 0.67515(9) 0.0399 1.0000 Uani . . . . . . 
P3 P 0.01346(7) 0.22674(5) 0.43667(2) 0.0253 1.0000 Uani . . . . . . 
F3 F 0.0344(2) 0.29809(11) 0.40070(5) 0.0497 1.0000 Uani . . . . . . 
F2 F -0.02858(18) 0.15227(11) 0.40345(5) 0.0454 1.0000 Uani . . . . . . 
F4 F -0.14694(16) 0.25720(13) 0.43945(5) 0.0470 1.0000 Uani . . . . . . 
F5 F -0.01160(19) 0.15586(12) 0.47264(5) 0.0487 1.0000 Uani . . . . . . 
F6 F 0.17148(17) 0.19685(13) 0.43366(6) 0.0556 1.0000 Uani . . . . . . 
F1 F 0.05165(18) 0.30175(11) 0.47010(5) 0.0439 1.0000 Uani . . . . . . 
O2 O 0.4295(2) 0.17697(14) 0.35382(6) 0.0472 1.0000 Uani . . . . . . 
C63 C 0.4953(3) 0.1860(2) 0.38543(9) 0.0364 1.0000 Uani . . . . . . 
C64 C 0.5788(4) 0.1098(2) 0.40406(10) 0.0513 1.0000 Uani . . . . . . 
C65 C 0.4989(4) 0.2731(2) 0.40835(10) 0.0558 1.0000 Uani . . . . . . 
H101 H 0.0078 0.2590 0.6330 0.0322 1.0000 Uiso R . . . . . 
H111 H -0.1545 0.2074 0.6812 0.0371 1.0000 Uiso R . . . . . 
H121 H -0.0812 0.1213 0.7371 0.0408 1.0000 Uiso R . . . . . 
H131 H 0.1565 0.0934 0.7474 0.0417 1.0000 Uiso R . . . . . 
H141 H 0.3199 0.1515 0.7012 0.0348 1.0000 Uiso R . . . . . 
H161 H 0.4435 0.2328 0.5482 0.0401 1.0000 Uiso R . . . . . 
H171 H 0.4445 0.1320 0.4932 0.0502 1.0000 Uiso R . . . . . 
H181 H 0.2971 0.0087 0.4934 0.0519 1.0000 Uiso R . . . . . 
H191 H 0.1497 -0.0160 0.5488 0.0501 1.0000 Uiso R . . . . . 
H201 H 0.1519 0.0816 0.6052 0.0389 1.0000 Uiso R . . . . . 
H211 H 0.1356 0.2912 0.5538 0.0318 1.0000 Uiso R . . . . . 
H221 H 0.0348 0.4228 0.5280 0.0340 1.0000 Uiso R . . . . . 
H231 H 0.0721 0.5601 0.5613 0.0328 1.0000 Uiso R . . . . . 
H241 H 0.2160 0.5655 0.6196 0.0308 1.0000 Uiso R . . . . . 
H251 H 0.0911 0.4514 0.6853 0.0304 1.0000 Uiso R . . . . . 
H261 H 0.0155 0.4097 0.7511 0.0347 1.0000 Uiso R . . . . . 
H271 H 0.1725 0.3511 0.7986 0.0331 1.0000 Uiso R . . . . . 
H281 H 0.4074 0.3326 0.7809 0.0260 1.0000 Uiso R . . . . . 
H301 H 0.6127 0.1819 0.7444 0.0322 1.0000 Uiso R . . . . . 
H311 H 0.7245 0.1337 0.8042 0.0423 1.0000 Uiso R . . . . . 
H321 H 0.8424 0.2381 0.8460 0.0407 1.0000 Uiso R . . . . . 
H331 H 0.8410 0.3901 0.8279 0.0418 1.0000 Uiso R . . . . . 
H341 H 0.7223 0.4387 0.7693 0.0368 1.0000 Uiso R . . . . . 
H361 H 0.8155 0.4028 0.6634 0.0298 1.0000 Uiso R . . . . . 
H371 H 0.9141 0.5383 0.6423 0.0338 1.0000 Uiso R . . . . . 
H381 H 0.8044 0.6740 0.6571 0.0377 1.0000 Uiso R . . . . . 
H391 H 0.5968 0.6746 0.6944 0.0390 1.0000 Uiso R . . . . . 
H401 H 0.5000 0.5397 0.7166 0.0293 1.0000 Uiso R . . . . . 
H451 H 0.5583 0.4516 0.6000 0.0309 1.0000 Uiso R . . . . . 
H471 H 0.6737 0.5538 0.5076 0.0506 1.0000 Uiso R . . . . . 
H472 H 0.6761 0.5809 0.5538 0.0506 1.0000 Uiso R . . . . . 
H473 H 0.5363 0.5540 0.5328 0.0506 1.0000 Uiso R . . . . . 
H481 H 0.7608 0.4058 0.4947 0.0432 1.0000 Uiso R . . . . . 
H491 H 0.8123 0.2608 0.5178 0.0412 1.0000 Uiso R . . . . . 
H501 H 0.8733 0.1363 0.5459 0.0379 1.0000 Uiso R . . . . . 
H511 H 0.8934 -0.0094 0.5726 0.0409 1.0000 Uiso R . . . . . 
H521 H 0.7610 -0.0490 0.6299 0.0406 1.0000 Uiso R . . . . . 
H541 H 0.5392 0.1032 0.6837 0.0498 1.0000 Uiso R . . . . . 
H542 H 0.6533 0.0344 0.6965 0.0498 1.0000 Uiso R . . . . . 
H543 H 0.5284 0.0038 0.6693 0.0498 1.0000 Uiso R . . . . . 
H641 H 0.6240 0.1302 0.4284 0.0583 1.0000 Uiso R . . . . . 
H642 H 0.5184 0.0611 0.4106 0.0583 1.0000 Uiso R . . . . . 
H643 H 0.6468 0.0902 0.3848 0.0583 1.0000 Uiso R . . . . . 
H651 H 0.5571 0.2670 0.4320 0.0633 1.0000 Uiso R . . . . . 
H652 H 0.4071 0.2887 0.4167 0.0633 1.0000 Uiso R . . . . . 
H653 H 0.5350 0.3189 0.3910 0.0633 1.0000 Uiso R . . . . . 
loop_
_atom_site_aniso_label
_atom_site_aniso_U_11
_atom_site_aniso_U_22
_atom_site_aniso_U_33
_atom_site_aniso_U_23
_atom_site_aniso_U_13
_atom_site_aniso_U_12
Cu1 0.01829(17) 0.01845(18) 0.02066(18) -0.00077(15) 0.00130(14) 0.00076(15) 
P2 0.0157(3) 0.0172(3) 0.0187(3) 0.0002(2) 0.0005(2) 0.0000(2) 
C3 0.0177(12) 0.0153(12) 0.0213(12) -0.0032(10) 0.0010(10) -0.0019(9) 
C4 0.0196(12) 0.0174(12) 0.0206(12) -0.0042(10) 0.0020(10) -0.0010(10) 
O1 0.0199(8) 0.0242(9) 0.0179(8) 0.0003(7) -0.0016(7) -0.0004(7) 
C6 0.0169(12) 0.0260(14) 0.0196(12) 0.0023(10) 0.0006(10) -0.0011(10) 
C7 0.0186(12) 0.0229(13) 0.0229(13) 0.0038(11) 0.0006(10) -0.0007(10) 
P1 0.0186(3) 0.0181(3) 0.0218(3) 0.0003(3) -0.0015(2) -0.0004(2) 
C9 0.0207(12) 0.0181(13) 0.0245(13) -0.0022(10) -0.0002(10) -0.0028(10) 
C10 0.0238(13) 0.0283(14) 0.0273(14) -0.0005(12) -0.0044(11) -0.0008(11) 
C11 0.0191(13) 0.0367(16) 0.0369(16) -0.0049(13) -0.0002(11) -0.0025(12) 
C12 0.0274(14) 0.0379(17) 0.0336(15) 0.0036(13) 0.0083(12) -0.0054(13) 
C13 0.0331(16) 0.0408(18) 0.0326(16) 0.0115(13) 0.0024(12) 0.0024(13) 
C14 0.0200(13) 0.0347(16) 0.0321(15) 0.0051(12) 0.0015(11) 0.0027(12) 
C15 0.0219(13) 0.0215(13) 0.0269(14) -0.0022(11) -0.0058(10) 0.0043(11) 
C16 0.0347(15) 0.0367(17) 0.0295(15) -0.0061(13) 0.0011(12) -0.0065(13) 
C17 0.0448(18) 0.056(2) 0.0269(16) -0.0090(15) 0.0007(13) 0.0018(16) 
C18 0.0508(19) 0.0428(19) 0.0389(18) -0.0189(15) -0.0125(15) 0.0083(16) 
C19 0.0431(18) 0.0274(16) 0.053(2) -0.0106(14) -0.0097(15) -0.0034(14) 
C20 0.0298(15) 0.0260(15) 0.0382(16) -0.0039(12) 0.0003(12) -0.0011(12) 
C21 0.0276(14) 0.0258(14) 0.0255(14) -0.0002(11) -0.0026(11) -0.0017(11) 
C22 0.0280(14) 0.0313(15) 0.0248(14) 0.0040(12) -0.0053(11) 0.0025(12) 
C23 0.0277(14) 0.0268(14) 0.0248(14) 0.0066(11) 0.0036(11) 0.0065(11) 
C24 0.0259(13) 0.0197(13) 0.0259(14) -0.0011(11) 0.0030(11) 0.0007(10) 
C25 0.0198(13) 0.0274(14) 0.0286(14) -0.0032(11) -0.0026(11) 0.0032(11) 
C26 0.0188(13) 0.0355(16) 0.0341(15) -0.0065(13) 0.0077(11) 0.0008(11) 
C27 0.0271(14) 0.0293(15) 0.0244(14) -0.0023(11) 0.0074(11) -0.0021(11) 
C28 0.0226(13) 0.0215(13) 0.0216(13) -0.0019(10) 0.0005(10) -0.0010(10) 
C29 0.0153(12) 0.0251(13) 0.0211(13) 0.0017(10) 0.0024(10) 0.0014(10) 
C30 0.0281(14) 0.0264(14) 0.0250(13) -0.0003(11) -0.0027(11) 0.0013(11) 
C31 0.0381(16) 0.0313(16) 0.0302(15) 0.0076(12) 0.0003(13) 0.0075(13) 
C32 0.0263(14) 0.0514(19) 0.0273(14) 0.0082(14) -0.0044(11) 0.0029(14) 
C33 0.0302(15) 0.0456(18) 0.0270(15) 0.0005(13) -0.0062(12) -0.0111(13) 
C34 0.0299(14) 0.0290(15) 0.0263(14) 0.0026(12) -0.0019(11) -0.0084(12) 
C35 0.0172(12) 0.0241(13) 0.0189(12) 0.0013(10) -0.0020(10) -0.0027(10) 
C36 0.0178(12) 0.0258(14) 0.0247(13) 0.0013(11) 0.0006(10) 0.0020(10) 
C37 0.0179(12) 0.0359(16) 0.0295(14) 0.0043(12) 0.0027(11) -0.0034(11) 
C38 0.0314(15) 0.0237(15) 0.0368(16) 0.0055(12) 0.0032(12) -0.0090(12) 
C39 0.0319(15) 0.0201(14) 0.0442(17) -0.0016(12) 0.0047(13) 0.0003(11) 
C40 0.0182(12) 0.0230(14) 0.0309(14) -0.0024(11) 0.0036(11) -0.0017(10) 
N2 0.0212(11) 0.0217(11) 0.0238(11) -0.0048(9) -0.0006(8) 0.0008(9) 
C42 0.0204(13) 0.0263(14) 0.0248(13) -0.0059(11) -0.0043(10) 0.0007(11) 
C43 0.0172(12) 0.0314(15) 0.0213(13) -0.0037(11) 0.0020(10) -0.0012(11) 
N1 0.0192(10) 0.0218(11) 0.0214(11) -0.0000(9) -0.0006(8) -0.0013(9) 
C45 0.0221(13) 0.0243(14) 0.0305(14) -0.0005(11) -0.0004(11) -0.0015(11) 
C46 0.0299(14) 0.0306(15) 0.0287(15) 0.0049(12) -0.0012(12) -0.0018(12) 
C47 0.0495(19) 0.0368(17) 0.0399(18) 0.0134(14) 0.0060(14) -0.0004(15) 
C48 0.0378(17) 0.0441(18) 0.0282(15) 0.0101(13) 0.0113(13) -0.0010(14) 
C49 0.0332(15) 0.0378(17) 0.0310(15) -0.0004(13) 0.0085(12) 0.0038(13) 
C50 0.0264(14) 0.0357(16) 0.0300(15) -0.0069(13) 0.0033(12) 0.0019(12) 
C51 0.0311(15) 0.0295(16) 0.0401(17) -0.0100(13) -0.0006(13) 0.0082(12) 
C52 0.0371(16) 0.0225(15) 0.0431(17) -0.0050(13) -0.0040(13) 0.0051(12) 
C53 0.0313(15) 0.0215(14) 0.0316(15) -0.0026(11) -0.0045(12) 0.0021(11) 
C54 0.0541(19) 0.0260(15) 0.0397(17) 0.0019(13) 0.0099(15) 0.0056(14) 
P3 0.0288(3) 0.0236(3) 0.0236(3) 0.0000(3) 0.0010(3) 0.0017(3) 
F3 0.0711(12) 0.0407(11) 0.0377(10) 0.0105(8) 0.0134(9) -0.0025(9) 
F2 0.0620(12) 0.0340(10) 0.0402(10) -0.0113(8) -0.0093(8) 0.0069(9) 
F4 0.0318(9) 0.0597(12) 0.0495(10) -0.0076(9) 0.0001(7) 0.0092(9) 
F5 0.0706(13) 0.0369(10) 0.0386(10) 0.0112(8) -0.0003(9) -0.0040(9) 
F6 0.0327(10) 0.0682(14) 0.0661(13) -0.0073(10) 0.0027(9) 0.0112(9) 
F1 0.0559(11) 0.0357(10) 0.0401(10) -0.0085(8) -0.0093(8) -0.0023(8) 
O2 0.0622(15) 0.0414(13) 0.0378(12) -0.0000(10) -0.0071(11) -0.0031(11) 
C63 0.0418(17) 0.0418(18) 0.0255(15) -0.0010(13) 0.0031(13) -0.0042(14) 
C64 0.062(2) 0.046(2) 0.045(2) -0.0008(16) -0.0098(17) 0.0018(17) 
C65 0.061(2) 0.047(2) 0.059(2) -0.0099(18) -0.0130(18) 0.0063(18) 

_refine_ls_extinction_method 
    'None'
_oxford_refine_ls_scale 0.088779(8) 
loop_
 _geom_bond_atom_site_label_1
 _geom_bond_site_symmetry_1
 _geom_bond_atom_site_label_2
 _geom_bond_site_symmetry_2
 _geom_bond_distance
 _geom_bond_publ_flag
Cu1 . P2 . 2.2517(7)    yes
Cu1 . P1 . 2.2967(7)    yes
Cu1 . N2 . 2.089(2)    yes
Cu1 . N1 . 2.075(2)    yes
P2 . C3 . 1.838(2)    yes
P2 . C29 . 1.834(2)    yes
P2 . C35 . 1.830(2)    yes
C3 . C4 . 1.395(3)    yes
C3 . C28 . 1.389(3)    yes
C4 . O1 . 1.390(3)    yes
C4 . C25 . 1.377(3)    yes
O1 . C6 . 1.396(3)    yes
C6 . C7 . 1.394(3)    yes
C6 . C24 . 1.375(3)    yes
C7 . P1 . 1.838(2)    yes
C7 . C21 . 1.394(3)    yes
P1 . C9 . 1.832(2)    yes
P1 . C15 . 1.815(3)    yes
C9 . C10 . 1.395(3)    yes
C9 . C14 . 1.384(3)    yes
C10 . C11 . 1.392(3)    yes
C10 . H101 . 0.949    no
C11 . C12 . 1.374(4)    yes
C11 . H111 . 0.948    no
C12 . C13 . 1.386(4)    yes
C12 . H121 . 0.950    no
C13 . C14 . 1.387(4)    yes
C13 . H131 . 0.949    no
C14 . H141 . 0.948    no
C15 . C16 . 1.410(4)    yes
C15 . C20 . 1.383(4)    yes
C16 . C17 . 1.378(4)    yes
C16 . H161 . 0.949    no
C17 . C18 . 1.360(4)    yes
C17 . H171 . 0.950    no
C18 . C19 . 1.379(4)    yes
C18 . H181 . 0.950    no
C19 . C20 . 1.386(4)    yes
C19 . H191 . 0.949    no
C20 . H201 . 0.950    no
C21 . C22 . 1.384(4)    yes
C21 . H211 . 0.950    no
C22 . C23 . 1.381(4)    yes
C22 . H221 . 0.949    no
C23 . C24 . 1.386(3)    yes
C23 . H231 . 0.949    no
C24 . H241 . 0.950    no
C25 . C26 . 1.386(4)    yes
C25 . H251 . 0.949    no
C26 . C27 . 1.371(4)    yes
C26 . H261 . 0.949    no
C27 . C28 . 1.392(3)    yes
C27 . H271 . 0.950    no
C28 . H281 . 0.949    no
C29 . C30 . 1.382(3)    yes
C29 . C34 . 1.395(3)    yes
C30 . C31 . 1.385(4)    yes
C30 . H301 . 0.949    no
C31 . C32 . 1.386(4)    yes
C31 . H311 . 0.950    no
C32 . C33 . 1.383(4)    yes
C32 . H321 . 0.949    no
C33 . C34 . 1.382(4)    yes
C33 . H331 . 0.949    no
C34 . H341 . 0.950    no
C35 . C36 . 1.405(3)    yes
C35 . C40 . 1.377(3)    yes
C36 . C37 . 1.376(4)    yes
C36 . H361 . 0.950    no
C37 . C38 . 1.371(4)    yes
C37 . H371 . 0.949    no
C38 . C39 . 1.389(4)    yes
C38 . H381 . 0.950    no
C39 . C40 . 1.374(3)    yes
C39 . H391 . 0.950    no
C40 . H401 . 0.949    no
N2 . C42 . 1.349(3)    yes
N2 . C53 . 1.350(3)    yes
C42 . C43 . 1.483(4)    yes
C42 . C50 . 1.391(3)    yes
C43 . N1 . 1.358(3)    yes
C43 . C49 . 1.376(3)    yes
N1 . C45 . 1.337(3)    yes
C45 . C46 . 1.390(3)    yes
C45 . H451 . 0.950    no
C46 . C47 . 1.502(4)    yes
C46 . C48 . 1.373(4)    yes
C47 . H471 . 0.950    no
C47 . H472 . 0.949    no
C47 . H473 . 0.948    no
C48 . C49 . 1.377(4)    yes
C48 . H481 . 0.950    no
C49 . H491 . 0.950    no
C50 . C51 . 1.375(4)    yes
C50 . H501 . 0.950    no
C51 . C52 . 1.374(4)    yes
C51 . H511 . 0.950    no
C52 . C53 . 1.391(4)    yes
C52 . H521 . 0.950    no
C53 . C54 . 1.482(4)    yes
C54 . H541 . 0.950    no
C54 . H542 . 0.949    no
C54 . H543 . 0.949    no
P3 . F3 . 1.5907(17)    yes
P3 . F2 . 1.5947(17)    yes
P3 . F4 . 1.6021(16)    yes
P3 . F5 . 1.5917(17)    yes
P3 . F6 . 1.5783(17)    yes
P3 . F1 . 1.5963(17)    yes
O2 . C63 . 1.208(3)    yes
C63 . C64 . 1.509(4)    yes
C63 . C65 . 1.492(4)    yes
C64 . H641 . 0.949    no
C64 . H642 . 0.950    no
C64 . H643 . 0.950    no
C65 . H651 . 0.949    no
C65 . H652 . 0.949    no
C65 . H653 . 0.950    no
loop_
 _geom_angle_atom_site_label_1
 _geom_angle_site_symmetry_1
 _geom_angle_atom_site_label_2
 _geom_angle_site_symmetry_2
 _geom_angle_atom_site_label_3
 _geom_angle_site_symmetry_3
 _geom_angle
 _geom_angle_publ_flag
P2 . Cu1 . P1 . 113.48(3)    yes
P2 . Cu1 . N2 . 131.84(6)    yes
P1 . Cu1 . N2 . 108.61(6)    yes
P2 . Cu1 . N1 . 110.64(6)    yes
P1 . Cu1 . N1 . 103.82(6)    yes
N2 . Cu1 . N1 . 79.90(8)    yes
Cu1 . P2 . C3 . 108.33(8)    yes
Cu1 . P2 . C29 . 125.80(8)    yes
C3 . P2 . C29 . 102.81(11)    yes
Cu1 . P2 . C35 . 110.66(8)    yes
C3 . P2 . C35 . 104.28(11)    yes
C29 . P2 . C35 . 102.89(11)    yes
P2 . C3 . C4 . 118.45(17)    yes
P2 . C3 . C28 . 122.98(18)    yes
C4 . C3 . C28 . 118.1(2)    yes
C3 . C4 . O1 . 115.94(19)    yes
C3 . C4 . C25 . 121.5(2)    yes
O1 . C4 . C25 . 122.5(2)    yes
C4 . O1 . C6 . 118.16(17)    yes
O1 . C6 . C7 . 119.1(2)    yes
O1 . C6 . C24 . 118.7(2)    yes
C7 . C6 . C24 . 122.1(2)    yes
C6 . C7 . P1 . 119.84(18)    yes
C6 . C7 . C21 . 117.2(2)    yes
P1 . C7 . C21 . 123.0(2)    yes
C7 . P1 . Cu1 . 113.90(8)    yes
C7 . P1 . C9 . 102.83(11)    yes
Cu1 . P1 . C9 . 120.35(8)    yes
C7 . P1 . C15 . 101.96(11)    yes
Cu1 . P1 . C15 . 111.60(8)    yes
C9 . P1 . C15 . 104.16(11)    yes
P1 . C9 . C10 . 122.41(19)    yes
P1 . C9 . C14 . 118.88(18)    yes
C10 . C9 . C14 . 118.7(2)    yes
C9 . C10 . C11 . 120.1(2)    yes
C9 . C10 . H101 . 119.5    no
C11 . C10 . H101 . 120.4    no
C10 . C11 . C12 . 120.4(2)    yes
C10 . C11 . H111 . 119.6    no
C12 . C11 . H111 . 120.0    no
C11 . C12 . C13 . 120.0(2)    yes
C11 . C12 . H121 . 120.1    no
C13 . C12 . H121 . 119.9    no
C12 . C13 . C14 . 119.6(3)    yes
C12 . C13 . H131 . 119.8    no
C14 . C13 . H131 . 120.6    no
C13 . C14 . C9 . 121.1(2)    yes
C13 . C14 . H141 . 119.6    no
C9 . C14 . H141 . 119.3    no
P1 . C15 . C16 . 117.3(2)    yes
P1 . C15 . C20 . 124.9(2)    yes
C16 . C15 . C20 . 117.8(2)    yes
C15 . C16 . C17 . 120.9(3)    yes
C15 . C16 . H161 . 118.7    no
C17 . C16 . H161 . 120.4    no
C16 . C17 . C18 . 120.4(3)    yes
C16 . C17 . H171 . 119.8    no
C18 . C17 . H171 . 119.9    no
C17 . C18 . C19 . 119.9(3)    yes
C17 . C18 . H181 . 120.3    no
C19 . C18 . H181 . 119.8    no
C18 . C19 . C20 . 120.6(3)    yes
C18 . C19 . H191 . 119.6    no
C20 . C19 . H191 . 119.8    no
C19 . C20 . C15 . 120.5(3)    yes
C19 . C20 . H201 . 120.2    no
C15 . C20 . H201 . 119.3    no
C7 . C21 . C22 . 121.1(2)    yes
C7 . C21 . H211 . 118.9    no
C22 . C21 . H211 . 119.9    no
C21 . C22 . C23 . 120.4(2)    yes
C21 . C22 . H221 . 120.0    no
C23 . C22 . H221 . 119.6    no
C22 . C23 . C24 . 119.4(2)    yes
C22 . C23 . H231 . 120.7    no
C24 . C23 . H231 . 119.9    no
C23 . C24 . C6 . 119.8(2)    yes
C23 . C24 . H241 . 120.1    no
C6 . C24 . H241 . 120.2    no
C4 . C25 . C26 . 119.2(2)    yes
C4 . C25 . H251 . 120.1    no
C26 . C25 . H251 . 120.6    no
C25 . C26 . C27 . 120.6(2)    yes
C25 . C26 . H261 . 119.9    no
C27 . C26 . H261 . 119.5    no
C26 . C27 . C28 . 119.9(2)    yes
C26 . C27 . H271 . 120.2    no
C28 . C27 . H271 . 119.9    no
C27 . C28 . C3 . 120.6(2)    yes
C27 . C28 . H281 . 119.8    no
C3 . C28 . H281 . 119.6    no
P2 . C29 . C30 . 119.28(19)    yes
P2 . C29 . C34 . 122.12(19)    yes
C30 . C29 . C34 . 118.6(2)    yes
C29 . C30 . C31 . 121.3(3)    yes
C29 . C30 . H301 . 119.2    no
C31 . C30 . H301 . 119.4    no
C30 . C31 . C32 . 119.7(3)    yes
C30 . C31 . H311 . 119.9    no
C32 . C31 . H311 . 120.4    no
C31 . C32 . C33 . 119.4(3)    yes
C31 . C32 . H321 . 120.3    no
C33 . C32 . H321 . 120.3    no
C32 . C33 . C34 . 120.8(3)    yes
C32 . C33 . H331 . 119.8    no
C34 . C33 . H331 . 119.4    no
C29 . C34 . C33 . 120.1(3)    yes
C29 . C34 . H341 . 119.9    no
C33 . C34 . H341 . 120.0    no
P2 . C35 . C36 . 118.26(19)    yes
P2 . C35 . C40 . 123.51(18)    yes
C36 . C35 . C40 . 118.1(2)    yes
C35 . C36 . C37 . 120.3(2)    yes
C35 . C36 . H361 . 119.3    no
C37 . C36 . H361 . 120.4    no
C36 . C37 . C38 . 120.6(2)    yes
C36 . C37 . H371 . 119.7    no
C38 . C37 . H371 . 119.7    no
C37 . C38 . C39 . 119.7(2)    yes
C37 . C38 . H381 . 120.5    no
C39 . C38 . H381 . 119.8    no
C38 . C39 . C40 . 119.7(2)    yes
C38 . C39 . H391 . 119.6    no
C40 . C39 . H391 . 120.6    no
C35 . C40 . C39 . 121.5(2)    yes
C35 . C40 . H401 . 119.2    no
C39 . C40 . H401 . 119.3    no
Cu1 . N2 . C42 . 113.72(17)    yes
Cu1 . N2 . C53 . 127.60(17)    yes
C42 . N2 . C53 . 118.7(2)    yes
N2 . C42 . C43 . 116.1(2)    yes
N2 . C42 . C50 . 121.8(2)    yes
C43 . C42 . C50 . 122.1(2)    yes
C42 . C43 . N1 . 115.8(2)    yes
C42 . C43 . C49 . 123.3(2)    yes
N1 . C43 . C49 . 120.8(2)    yes
C43 . N1 . Cu1 . 113.85(16)    yes
C43 . N1 . C45 . 118.3(2)    yes
Cu1 . N1 . C45 . 127.11(17)    yes
N1 . C45 . C46 . 124.0(2)    yes
N1 . C45 . H451 . 118.1    no
C46 . C45 . H451 . 117.9    no
C45 . C46 . C47 . 120.7(3)    yes
C45 . C46 . C48 . 116.3(3)    yes
C47 . C46 . C48 . 122.9(3)    yes
C46 . C47 . H471 . 109.4    no
C46 . C47 . H472 . 109.3    no
H471 . C47 . H472 . 109.5    no
C46 . C47 . H473 . 109.7    no
H471 . C47 . H473 . 109.5    no
H472 . C47 . H473 . 109.4    no
C46 . C48 . C49 . 120.9(3)    yes
C46 . C48 . H481 . 119.3    no
C49 . C48 . H481 . 119.8    no
C48 . C49 . C43 . 119.5(3)    yes
C48 . C49 . H491 . 120.5    no
C43 . C49 . H491 . 120.0    no
C42 . C50 . C51 . 119.4(3)    yes
C42 . C50 . H501 . 120.2    no
C51 . C50 . H501 . 120.4    no
C50 . C51 . C52 . 118.9(3)    yes
C50 . C51 . H511 . 120.5    no
C52 . C51 . H511 . 120.6    no
C51 . C52 . C53 . 119.7(3)    yes
C51 . C52 . H521 . 120.0    no
C53 . C52 . H521 . 120.2    no
C52 . C53 . N2 . 121.5(2)    yes
C52 . C53 . C54 . 120.5(2)    yes
N2 . C53 . C54 . 118.0(2)    yes
C53 . C54 . H541 . 109.4    no
C53 . C54 . H542 . 109.5    no
H541 . C54 . H542 . 109.4    no
C53 . C54 . H543 . 109.5    no
H541 . C54 . H543 . 109.6    no
H542 . C54 . H543 . 109.4    no
F3 . P3 . F2 . 89.86(10)    yes
F3 . P3 . F4 . 88.74(10)    yes
F2 . P3 . F4 . 89.79(9)    yes
F3 . P3 . F5 . 178.56(11)    yes
F2 . P3 . F5 . 89.97(10)    yes
F4 . P3 . F5 . 89.83(10)    yes
F3 . P3 . F6 . 90.99(10)    yes
F2 . P3 . F6 . 90.04(10)    yes
F4 . P3 . F6 . 179.68(10)    yes
F5 . P3 . F6 . 90.44(10)    yes
F3 . P3 . F1 . 90.30(10)    yes
F2 . P3 . F1 . 178.62(10)    yes
F4 . P3 . F1 . 88.85(10)    yes
F5 . P3 . F1 . 89.84(9)    yes
F6 . P3 . F1 . 91.32(10)    yes
O2 . C63 . C64 . 121.9(3)    yes
O2 . C63 . C65 . 122.0(3)    yes
C64 . C63 . C65 . 116.1(3)    yes
C63 . C64 . H641 . 109.4    no
C63 . C64 . H642 . 109.8    no
H641 . C64 . H642 . 109.4    no
C63 . C64 . H643 . 109.2    no
H641 . C64 . H643 . 109.6    no
H642 . C64 . H643 . 109.4    no
C63 . C65 . H651 . 109.4    no
C63 . C65 . H652 . 109.6    no
H651 . C65 . H652 . 109.4    no
C63 . C65 . H653 . 109.4    no
H651 . C65 . H653 . 109.5    no
H652 . C65 . H653 . 109.5    no
loop_
 _geom_hbond_atom_site_label_D
 _geom_hbond_site_symmetry_D
 _geom_hbond_atom_site_label_H
 _geom_hbond_site_symmetry_H
 _geom_hbond_atom_site_label_A
 _geom_hbond_site_symmetry_A
 _geom_hbond_angle_DHA
 _geom_hbond_distance_DH
 _geom_hbond_distance_HA
 _geom_hbond_distance_DA
 _geom_hbond_publ_flag
C28 . H281 . O2 4_555 138 0.95 2.38 3.150(4)    yes


_iucr_refine_instructions_details
;
#
# Punched on 17/01/19 at 14:42:14
#
#LIST     12                                                                    
BLOCK SCALE X'S  U'S 
RIDE C   (  10,X'S) H   ( 101,X'S) 
RIDE C   (  11,X'S) H   ( 111,X'S) 
RIDE C   (  12,X'S) H   ( 121,X'S) 
RIDE C   (  13,X'S) H   ( 131,X'S) 
RIDE C   (  14,X'S) H   ( 141,X'S) 
RIDE C   (  16,X'S) H   ( 161,X'S) 
RIDE C   (  17,X'S) H   ( 171,X'S) 
RIDE C   (  18,X'S) H   ( 181,X'S) 
RIDE C   (  19,X'S) H   ( 191,X'S) 
RIDE C   (  20,X'S) H   ( 201,X'S) 
RIDE C   (  21,X'S) H   ( 211,X'S) 
RIDE C   (  22,X'S) H   ( 221,X'S) 
RIDE C   (  23,X'S) H   ( 231,X'S) 
RIDE C   (  24,X'S) H   ( 241,X'S) 
RIDE C   (  25,X'S) H   ( 251,X'S) 
RIDE C   (  26,X'S) H   ( 261,X'S) 
RIDE C   (  27,X'S) H   ( 271,X'S) 
RIDE C   (  28,X'S) H   ( 281,X'S) 
RIDE C   (  30,X'S) H   ( 301,X'S) 
RIDE C   (  31,X'S) H   ( 311,X'S) 
RIDE C   (  32,X'S) H   ( 321,X'S) 
RIDE C   (  33,X'S) H   ( 331,X'S) 
RIDE C   (  34,X'S) H   ( 341,X'S) 
RIDE C   (  36,X'S) H   ( 361,X'S) 
RIDE C   (  37,X'S) H   ( 371,X'S) 
RIDE C   (  38,X'S) H   ( 381,X'S) 
RIDE C   (  39,X'S) H   ( 391,X'S) 
RIDE C   (  40,X'S) H   ( 401,X'S) 
RIDE C   (  45,X'S) H   ( 451,X'S) 
RIDE C   (  47,X'S) H   ( 471,X'S) H   ( 472,X'S) H   ( 473,X'S) 
RIDE C   (  48,X'S) H   ( 481,X'S) 
RIDE C   (  49,X'S) H   ( 491,X'S) 
RIDE C   (  50,X'S) H   ( 501,X'S) 
RIDE C   (  51,X'S) H   ( 511,X'S) 
RIDE C   (  52,X'S) H   ( 521,X'S) 
RIDE C   (  54,X'S) H   ( 541,X'S) H   ( 542,X'S) H   ( 543,X'S) 
RIDE C   (  64,X'S) H   ( 641,X'S) H   ( 642,X'S) H   ( 643,X'S) 
RIDE C   (  65,X'S) H   ( 651,X'S) H   ( 652,X'S) H   ( 653,X'S) 
END                                                                             
#
# Punched on 17/01/19 at 14:42:14
#
#LIST     16                                                                    
NO 
REM   HREST   START (DO NOT REMOVE THIS LINE) 
REM   HREST   END (DO NOT REMOVE THIS LINE) 
END                                                                             
;
# looking for ARCHIVE-HKL.CIF 
 
_iucr_refine_reflections_details 
; 
 
# Data was input as F-squared 
# This file can be directly input to CRYSTALS 
# without any editing by issuing: 
# #USE ARCHIVE-HKL.CIF 
# punching LIST  6 as LIST  6 with all keys set 
# NBGNXT=    36 
#LIST   6 
READ NCOEF= 8 TYPE=FIX, F'S = FSQ UNIT=DATA, CHECK=NO L30=NO ARCH=NO 
STORE  NCOEF= 6 
OUTPUT INDICES     /FO/        SIGMA(/FO/) RATIO/JCODE CORRECTIONS SERIAL 
CONT 
INPUT  H           K           L           /FO/        SIGMA(/FO/) JCODE 
CONT   CORRECTIONS SERIAL 
FOR (I4,I4,I4,F10.2,F8.2,F4.0,F7.4,F7.0) 
END 
   1   0   0     68.47    2.49  0. 1.0000     0. 
  -1   0   0     68.27    2.83  0. 1.0000     0. 
   1   0   0     66.85    2.49  0. 1.0000     0. 
   2   0   0    137.46    4.98  0. 1.0000     0. 
   2   0   0    141.01    4.99  0. 1.0000     0. 
  -2   0   0    130.65    5.69  0. 1.0000     0. 
  -3   0   0     51.94    2.28  0. 1.0000     0. 
  -3   0   0     54.48    1.87  0. 1.0000     0. 
   4   0   0     17.13    0.70  0. 1.0000     0. 
  -4   0   0     17.86    0.73  0. 1.0000     0. 
  -5   0   0     92.49    3.36  0. 1.0000     0. 
   5   0   0     99.83    3.33  0. 1.0000     0. 
  -6   0   0     60.04    2.21  0. 1.0000     0. 
   6   0   0     59.08    2.17  0. 1.0000     0. 
   7   0   0     11.28    0.63  0. 1.0000     0. 
   7   0   0     12.56    0.42  0. 1.0000     0. 
   7   0   0     10.89    0.40  0. 1.0000     0. 
  -7   0   0     10.84    0.65  0. 1.0000     0. 
  -8   0   0      9.19    0.56  0. 1.0000     0. 
   8   0   0      9.00    0.58  0. 1.0000     0. 
   8   0   0      8.18    0.33  0. 1.0000     0. 
   8   0   0      8.43    0.31  0. 1.0000     0. 
  -9   0   0     22.96    1.06  0. 1.0000     0. 
   9   0   0     24.54    0.76  0. 1.0000     0. 
 -10   0   0      8.59    0.52  0. 1.0000     0. 
  10   0   0      8.02    0.30  0. 1.0000     0. 
  11   0   0      4.26    0.18  0. 1.0000     0. 
  11   0   0      4.49    0.18  0. 1.0000     0. 
   0  -1   0     -1.07    0.02  0. 1.0000     0. 
   0  -1   0     -1.07    0.01  0. 1.0000     0. 
   0  -1   0     -1.06    0.02  0. 1.0000     0. 
   0   1   0     -1.08    0.02  0. 1.0000     0. 
   0   1   0     -1.04    0.02  0. 1.0000     0. 
   0   1   0     -1.07    0.01  0. 1.0000     0. 
   1  -1   0      2.26    0.15  0. 1.0000     0. 
  -1  -1   0      2.46    0.13  0. 1.0000     0. 
  -1  -1   0      2.17    0.15  0. 1.0000     0. 
   1  -1   0      2.53    0.14  0. 1.0000     0. 
   1  -1   0      2.19    0.14  0. 1.0000     0. 
   1   1   0      2.28    0.15  0. 1.0000     0. 
  -1   1   0      2.11    0.15  0. 1.0000     0. 
  -2  -1   0    134.18    5.21  0. 1.0000     0. 
  -2  -1   0    124.86    5.47  0. 1.0000     0. 
   2  -1   0    138.05    4.61  0. 1.0000     0. 
   2  -1   0    130.58    4.83  0. 1.0000     0. 
  -2   1   0    129.31    5.51  0. 1.0000     0. 
  -3  -1   0      2.97    0.19  0. 1.0000     0. 
   3  -1   0      3.02    0.19  0. 1.0000     0. 
  -3  -1   0      3.03    0.24  0. 1.0000     0. 
  -3   1   0      2.81    0.22  0. 1.0000     0. 
  -3   1   0      2.96    0.22  0. 1.0000     0. 
   4  -1   0     62.71    2.27  0. 1.0000     0. 
  -4  -1   0     63.57    2.81  0. 1.0000     0. 
   4  -1   0     65.34    2.43  0. 1.0000     0. 
  -4  -1   0     67.75    2.32  0. 1.0000     0. 
   4  -1   0     64.85    2.43  0. 1.0000     0. 
   4   1   0     64.94    2.27  0. 1.0000     0. 
  -4   1   0     69.67    2.32  0. 1.0000     0. 
  -5  -1   0     50.65    1.93  0. 1.0000     0. 
   5  -1   0     55.80    1.92  0. 1.0000     0. 
  -5   1   0     54.95    1.95  0. 1.0000     0. 
   5   1   0     50.40    1.89  0. 1.0000     0. 
   6  -1   0     68.54    2.39  0. 1.0000     0. 
  -6  -1   0     65.47    2.42  0. 1.0000     0. 
  -6   1   0     65.61    2.42  0. 1.0000     0. 
   6   1   0     63.62    2.37  0. 1.0000     0. 
   7  -1   0      2.12    0.31  0. 1.0000     0. 
  -7  -1   0      1.63    0.25  0. 1.0000     0. 
   7  -1   0      2.17    0.13  0. 1.0000     0. 
  -7  -1   0      1.68    0.28  0. 1.0000     0. 
   7   1   0      2.21    0.14  0. 1.0000     0. 
   7   1   0      1.90    0.10  0. 1.0000     0. 
  -7   1   0      2.39    0.33  0. 1.0000     0. 
   7   1   0      2.27    0.11  0. 1.0000     0. 
   7   1   0      2.11    0.29  0. 1.0000     0. 
   8  -1   0     19.36    0.72  0. 1.0000     0. 
   8  -1   0     20.76    0.95  0. 1.0000     0. 
   8  -1   0     20.22    0.67  0. 1.0000     0. 
   8  -1   0     18.72    0.65  0. 1.0000     0. 
   8  -1   0     18.91    0.67  0. 1.0000     0. 
  -8  -1   0     19.30    0.90  0. 1.0000     0. 
   8  -1   0     19.65    0.63  0. 1.0000     0. 
  -8   1   0     18.80    0.92  0. 1.0000     0. 
   8   1   0     19.40    0.62  0. 1.0000     0. 
   9  -1   0     11.17    0.47  0. 1.0000     0. 
   9  -1   0     12.34    0.69  0. 1.0000     0. 
   9  -1   0     11.81    0.40  0. 1.0000     0. 
  -9  -1   0      9.86    0.62  0. 1.0000     0. 
  -9   1   0     10.93    0.65  0. 1.0000     0. 
   9   1   0     11.75    0.40  0. 1.0000     0. 
  10  -1   0      8.84    0.33  0. 1.0000     0. 
 -10  -1   0      8.77    0.52  0. 1.0000     0. 
 -10   1   0      9.43    0.55  0. 1.0000     0. 
  10   1   0      9.01    0.32  0. 1.0000     0. 
  11  -1   0      9.30    0.32  0. 1.0000     0. 
  11   1   0      9.48    0.32  0. 1.0000     0. 
   0  -2   0    699.72   28.01  0. 1.0000     0. 
   0  -2   0    740.31   29.69  0. 1.0000     0. 
   0  -2   0    775.61   24.94  0. 1.0000     0. 
   0   2   0    678.31   27.95  0. 1.0000     0. 
   0   2   0    667.94   25.98  0. 1.0000     0. 
  -1  -2   0      0.19    0.07  0. 1.0000     0. 
   1  -2   0      0.60    0.09  0. 1.0000     0. 
   1  -2   0      0.50    0.09  0. 1.0000     0. 
  -1  -2   0      0.45    0.08  0. 1.0000     0. 
  -1   2   0      0.21    0.07  0. 1.0000     0. 
  -1   2   0      0.33    0.07  0. 1.0000     0. 
  -1   2   0      0.29    0.08  0. 1.0000     0. 
   1   2   0      0.26    0.07  0. 1.0000     0. 
  -2  -2   0    375.27   14.05  0. 1.0000     0. 
  -2  -2   0    368.99   12.49  0. 1.0000     0. 
   2  -2   0    346.21   13.07  0. 1.0000     0. 
   2  -2   0    380.55   12.52  0. 1.0000     0. 
   2  -2   0    358.28   14.89  0. 1.0000     0. 
  -2   2   0    357.40   14.05  0. 1.0000     0. 
   2   2   0    337.82   14.05  0. 1.0000     0. 
  -2   2   0    339.28   14.90  0. 1.0000     0. 
   3  -2   0     11.67    0.53  0. 1.0000     0. 
   3  -2   0     12.31    0.51  0. 1.0000     0. 
  -3  -2   0     12.56    0.61  0. 1.0000     0. 
  -3  -2   0     12.74    0.57  0. 1.0000     0. 
  -3   2   0     12.99    0.53  0. 1.0000     0. 
  -3   2   0     12.04    0.62  0. 1.0000     0. 
  -4  -2   0    166.01    6.92  0. 1.0000     0. 
   4  -2   0    155.96    6.07  0. 1.0000     0. 
   4  -2   0    169.92    5.53  0. 1.0000     0. 
   4   2   0    162.61    5.51  0. 1.0000     0. 
  -4   2   0    170.37    5.61  0. 1.0000     0. 
  -5  -2   0      0.57    0.17  0. 1.0000     0. 
   5   2   0      0.59    0.15  0. 1.0000     0. 
   6  -2   0     44.89    1.76  0. 1.0000     0. 
  -6  -2   0     46.61    1.71  0. 1.0000     0. 
  -6  -2   0     49.00    1.82  0. 1.0000     0. 
  -6   2   0     46.65    1.80  0. 1.0000     0. 
   6   2   0     49.13    1.77  0. 1.0000     0. 
   6   2   0     46.73    1.76  0. 1.0000     0. 
  -7  -2   0     26.46    1.10  0. 1.0000     0. 
   7  -2   0     27.16    1.16  0. 1.0000     0. 
  -7   2   0     26.14    1.18  0. 1.0000     0. 
   7   2   0     27.57    0.84  0. 1.0000     0. 
   8  -2   0     15.33    0.60  0. 1.0000     0. 
   8  -2   0     15.66    0.52  0. 1.0000     0. 
   8  -2   0     15.14    0.53  0. 1.0000     0. 
   8  -2   0     16.26    0.56  0. 1.0000     0. 
  -8  -2   0     14.79    0.76  0. 1.0000     0. 
   8  -2   0     16.11    0.82  0. 1.0000     0. 
   8   2   0     15.28    0.51  0. 1.0000     0. 
   9  -2   0      3.67    0.18  0. 1.0000     0. 
   9  -2   0      3.54    0.18  0. 1.0000     0. 
   9  -2   0      3.55    0.42  0. 1.0000     0. 
   9  -2   0      3.09    0.23  0. 1.0000     0. 
  -9   2   0      3.22    0.37  0. 1.0000     0. 
   9   2   0      3.69    0.17  0. 1.0000     0. 
  10  -2   0      2.81    0.16  0. 1.0000     0. 
  10  -2   0      3.00    0.20  0. 1.0000     0. 
 -10   2   0      3.36    0.35  0. 1.0000     0. 
  10   2   0      2.58    0.15  0. 1.0000     0. 
  10   2   0      2.52    0.15  0. 1.0000     0. 
  11  -2   0      1.07    0.10  0. 1.0000     0. 
  11   2   0      1.26    0.09  0. 1.0000     0. 
   0  -3   0      0.05    0.09  0. 1.0000     0. 
   0  -3   0      0.01    0.09  0. 1.0000     0. 
   0  -3   0     -0.04    0.07  0. 1.0000     0. 
   0   3   0      0.02    0.06  0. 1.0000     0. 
   0   3   0      0.14    0.10  0. 1.0000     0. 
  -1  -3   0    116.82    5.01  0. 1.0000     0. 
  -1  -3   0    123.93    4.26  0. 1.0000     0. 
   1  -3   0    124.23    4.27  0. 1.0000     0. 
   1  -3   0    128.12    4.77  0. 1.0000     0. 
  -1  -3   0    124.33    4.77  0. 1.0000     0. 
   1  -3   0    118.15    5.05  0. 1.0000     0. 
   1   3   0    117.77    4.39  0. 1.0000     0. 
   1   3   0    119.53    4.77  0. 1.0000     0. 
  -1   3   0    116.88    5.04  0. 1.0000     0. 
   1   3   0    120.03    4.39  0. 1.0000     0. 
  -1   3   0    115.45    4.43  0. 1.0000     0. 
  -1   3   0    115.83    4.76  0. 1.0000     0. 
  -2  -3   0      3.11    0.18  0. 1.0000     0. 
  -2  -3   0      3.19    0.24  0. 1.0000     0. 
  -2  -3   0      3.57    0.22  0. 1.0000     0. 
   2  -3   0      2.81    0.23  0. 1.0000     0. 
   2  -3   0      3.20    0.23  0. 1.0000     0. 
  -2  -3   0      3.05    0.18  0. 1.0000     0. 
   2  -3   0      2.92    0.23  0. 1.0000     0. 
  -2   3   0      2.92    0.22  0. 1.0000     0. 
  -2   3   0      2.95    0.23  0. 1.0000     0. 
  -2   3   0      2.99    0.24  0. 1.0000     0. 
   2   3   0      2.85    0.23  0. 1.0000     0. 
  -2   3   0      3.27    0.23  0. 1.0000     0. 
  -3  -3   0      0.70    0.14  0. 1.0000     0. 
   3  -3   0      0.31    0.11  0. 1.0000     0. 
  -3  -3   0      0.36    0.08  0. 1.0000     0. 
  -3   3   0      0.70    0.14  0. 1.0000     0. 
  -4  -3   0     69.45    2.98  0. 1.0000     0. 
   4  -3   0     69.55    2.43  0. 1.0000     0. 
  -4   3   0     69.64    2.46  0. 1.0000     0. 
   5  -3   0      0.31    0.14  0. 1.0000     0. 
   5  -3   0      0.22    0.09  0. 1.0000     0. 
  -5   3   0      0.15    0.13  0. 1.0000     0. 
   5   3   0     -0.03    0.12  0. 1.0000     0. 
  -6  -3   0     44.44    1.76  0. 1.0000     0. 
   6  -3   0     45.36    1.72  0. 1.0000     0. 
  -6   3   0     45.67    1.75  0. 1.0000     0. 
   6   3   0     45.75    1.73  0. 1.0000     0. 
   7  -3   0      6.04    0.44  0. 1.0000     0. 
   7   3   0      5.70    0.25  0. 1.0000     0. 
  -7   3   0      5.30    0.45  0. 1.0000     0. 
   8  -3   0     37.77    1.18  0. 1.0000     0. 
   8  -3   0     37.29    1.31  0. 1.0000     0. 
   8  -3   0     37.89    1.22  0. 1.0000     0. 
   8  -3   0     39.07    1.32  0. 1.0000     0. 
   8  -3   0     39.64    1.59  0. 1.0000     0. 
   8   3   0     38.21    1.17  0. 1.0000     0. 
   9  -3   0     13.28    0.45  0. 1.0000     0. 
   9  -3   0     12.96    0.52  0. 1.0000     0. 
   9  -3   0     12.51    0.45  0. 1.0000     0. 
   9   3   0     12.84    0.44  0. 1.0000     0. 
  -9   3   0     13.69    0.73  0. 1.0000     0. 
  10  -3   0     14.30    0.48  0. 1.0000     0. 
  10  -3   0     14.06    0.54  0. 1.0000     0. 
  10   3   0     14.33    0.46  0. 1.0000     0. 
 -10   3   0     14.15    0.73  0. 1.0000     0. 
  11  -3   0      0.14    0.06  0. 1.0000     0. 
  11   3   0      0.21    0.05  0. 1.0000     0. 
   0  -4   0      0.13    0.11  0. 1.0000     0. 
   0  -4   0      0.32    0.11  0. 1.0000     0. 
   0  -4   0      0.12    0.11  0. 1.0000     0. 
   0   4   0      0.25    0.11  0. 1.0000     0. 
   0   4   0      0.29    0.09  0. 1.0000     0. 
  -1  -4   0      0.04    0.10  0. 1.0000     0. 
  -1  -4   0      0.05    0.10  0. 1.0000     0. 
   1  -4   0      0.10    0.10  0. 1.0000     0. 
   1  -4   0      0.09    0.10  0. 1.0000     0. 
  -1  -4   0      0.10    0.08  0. 1.0000     0. 
   1  -4   0     -0.02    0.09  0. 1.0000     0. 
  -1   4   0      0.15    0.10  0. 1.0000     0. 
   1   4   0      0.11    0.06  0. 1.0000     0. 
  -1   4   0      0.37    0.10  0. 1.0000     0. 
   1   4   0      0.08    0.05  0. 1.0000     0. 
   1   4   0      0.00    0.08  0. 1.0000     0. 
  -2  -4   0     35.35    1.49  0. 1.0000     0. 
  -2  -4   0     35.51    1.48  0. 1.0000     0. 
   2  -4   0     33.70    1.33  0. 1.0000     0. 
  -2  -4   0     35.38    1.47  0. 1.0000     0. 
  -2  -4   0     32.87    1.31  0. 1.0000     0. 
  -2   4   0     34.16    1.25  0. 1.0000     0. 
  -2   4   0     32.64    1.36  0. 1.0000     0. 
   3  -4   0     38.93    1.45  0. 1.0000     0. 
  -3  -4   0     39.59    1.74  0. 1.0000     0. 
   3  -4   0     40.49    1.55  0. 1.0000     0. 
  -3   4   0     42.43    1.48  0. 1.0000     0. 
   4  -4   0     29.69    1.13  0. 1.0000     0. 
  -4   4   0     28.66    1.14  0. 1.0000     0. 
   5  -4   0     32.16    1.25  0. 1.0000     0. 
   5   4   0     30.77    1.26  0. 1.0000     0. 
  -5   4   0     32.80    1.28  0. 1.0000     0. 
   6  -4   0     41.62    1.58  0. 1.0000     0. 
  -6  -4   0     39.14    1.60  0. 1.0000     0. 
  -6   4   0     40.28    1.60  0. 1.0000     0. 
   7  -4   0      1.50    0.28  0. 1.0000     0. 
  -7   4   0      1.47    0.29  0. 1.0000     0. 
   8  -4   0     11.08    0.42  0. 1.0000     0. 
   8  -4   0     10.28    0.40  0. 1.0000     0. 
   8  -4   0     10.91    0.46  0. 1.0000     0. 
   8  -4   0     10.62    0.67  0. 1.0000     0. 
   8  -4   0     10.66    0.39  0. 1.0000     0. 
   8   4   0     10.67    0.37  0. 1.0000     0. 
   9  -4   0      1.46    0.17  0. 1.0000     0. 
   9  -4   0      1.42    0.09  0. 1.0000     0. 
   9  -4   0      1.65    0.09  0. 1.0000     0. 
   9  -4   0      1.73    0.14  0. 1.0000     0. 
   9  -4   0      1.83    0.15  0. 1.0000     0. 
   9   4   0      1.50    0.12  0. 1.0000     0. 
   9   4   0      1.53    0.12  0. 1.0000     0. 
  -9   4   0      1.19    0.26  0. 1.0000     0. 
  10  -4   0      0.06    0.06  0. 1.0000     0. 
  10  -4   0      0.27    0.10  0. 1.0000     0. 
 -10   4   0      0.16    0.16  0. 1.0000     0. 
  10   4   0      0.10    0.05  0. 1.0000     0. 
  11  -4   0      0.46    0.06  0. 1.0000     0. 
  11   4   0      0.44    0.05  0. 1.0000     0. 
   0  -5   0     -0.14    0.10  0. 1.0000     0. 
   0  -5   0     -0.19    0.10  0. 1.0000     0. 
   0  -5   0     -0.19    0.09  0. 1.0000     0. 
   0   5   0     -0.08    0.06  0. 1.0000     0. 
   0   5   0     -0.16    0.07  0. 1.0000     0. 
  -1  -5   0      2.71    0.25  0. 1.0000     0. 
  -1  -5   0      2.59    0.21  0. 1.0000     0. 
   1  -5   0      2.84    0.24  0. 1.0000     0. 
   1  -5   0      2.36    0.25  0. 1.0000     0. 
   1  -5   0      3.14    0.26  0. 1.0000     0. 
  -1  -5   0      2.68    0.25  0. 1.0000     0. 
   1   5   0      2.67    0.15  0. 1.0000     0. 
  -1   5   0      3.07    0.22  0. 1.0000     0. 
   1   5   0      2.65    0.16  0. 1.0000     0. 
  -2  -5   0      0.00    0.10  0. 1.0000     0. 
   2  -5   0      0.10    0.11  0. 1.0000     0. 
  -2  -5   0      0.03    0.09  0. 1.0000     0. 
  -2   5   0      0.28    0.12  0. 1.0000     0. 
   3  -5   0      0.39    0.15  0. 1.0000     0. 
  -3  -5   0      0.25    0.12  0. 1.0000     0. 
  -3   5   0      0.90    0.17  0. 1.0000     0. 
   4  -5   0    143.01    4.78  0. 1.0000     0. 
  -4   5   0    137.83    4.84  0. 1.0000     0. 
   5  -5   0      2.73    0.29  0. 1.0000     0. 
  -5   5   0      2.43    0.30  0. 1.0000     0. 
   6  -5   0      6.68    0.47  0. 1.0000     0. 
   6  -5   0      6.12    0.18  0. 1.0000     0. 
  -6   5   0      6.18    0.47  0. 1.0000     0. 
   7  -5   0      4.94    0.23  0. 1.0000     0. 
   7  -5   0      5.50    0.46  0. 1.0000     0. 
   7  -5   0      5.45    0.25  0. 1.0000     0. 
   7  -5   0      5.30    0.25  0. 1.0000     0. 
   7   5   0      5.17    0.21  0. 1.0000     0. 
   7   5   0      5.27    0.21  0. 1.0000     0. 
  -7   5   0      4.77    0.46  0. 1.0000     0. 
   8  -5   0     31.43    1.12  0. 1.0000     0. 
   8  -5   0     32.98    1.00  0. 1.0000     0. 
   8  -5   0     31.36    1.39  0. 1.0000     0. 
   8  -5   0     31.34    1.04  0. 1.0000     0. 
   8  -5   0     32.21    1.12  0. 1.0000     0. 
   8   5   0     31.65    0.98  0. 1.0000     0. 
   8   5   0     32.10    0.98  0. 1.0000     0. 
   9  -5   0     13.23    0.47  0. 1.0000     0. 
   9  -5   0     12.17    0.46  0. 1.0000     0. 
   9  -5   0     13.07    0.46  0. 1.0000     0. 
   9  -5   0     12.78    0.53  0. 1.0000     0. 
   9  -5   0     13.66    0.47  0. 1.0000     0. 
   9   5   0     12.93    0.43  0. 1.0000     0. 
  -9   5   0     14.03    0.73  0. 1.0000     0. 
  10  -5   0      8.17    0.31  0. 1.0000     0. 
  10  -5   0      8.51    0.37  0. 1.0000     0. 
  10   5   0      8.43    0.29  0. 1.0000     0. 
   0  -6   0      3.11    0.27  0. 1.0000     0. 
   0  -6   0      3.51    0.32  0. 1.0000     0. 
   0   6   0      3.77    0.23  0. 1.0000     0. 
   1  -6   0     25.95    1.14  0. 1.0000     0. 
  -1  -6   0     27.38    1.14  0. 1.0000     0. 
  -1  -6   0     26.86    1.25  0. 1.0000     0. 
   1   6   0     27.31    1.04  0. 1.0000     0. 
  -1   6   0     27.90    1.12  0. 1.0000     0. 
   1   6   0     28.11    1.05  0. 1.0000     0. 
   2  -6   0     -0.02    0.12  0. 1.0000     0. 
  -2  -6   0      0.07    0.10  0. 1.0000     0. 
  -2  -6   0     -0.13    0.12  0. 1.0000     0. 
   2   6   0      0.14    0.11  0. 1.0000     0. 
   3  -6   0      1.28    0.23  0. 1.0000     0. 
  -3   6   0      1.33    0.22  0. 1.0000     0. 
   4  -6   0      0.12    0.14  0. 1.0000     0. 
  -4   6   0      0.06    0.14  0. 1.0000     0. 
   5  -6   0     54.10    1.95  0. 1.0000     0. 
   5  -6   0     48.53    1.40  0. 1.0000     0. 
  -5   6   0     53.33    1.98  0. 1.0000     0. 
   6  -6   0     15.63    0.82  0. 1.0000     0. 
   6  -6   0     16.89    0.46  0. 1.0000     0. 
  -6   6   0     16.04    0.83  0. 1.0000     0. 
   7  -6   0      3.57    0.21  0. 1.0000     0. 
   7  -6   0      3.78    0.40  0. 1.0000     0. 
   7  -6   0      3.32    0.25  0. 1.0000     0. 
   7  -6   0      3.66    0.20  0. 1.0000     0. 
   7  -6   0      4.05    0.22  0. 1.0000     0. 
   7   6   0      3.47    0.17  0. 1.0000     0. 
  -7   6   0      3.72    0.43  0. 1.0000     0. 
   8  -6   0      2.34    0.18  0. 1.0000     0. 
   8  -6   0      2.43    0.17  0. 1.0000     0. 
   8  -6   0      1.93    0.33  0. 1.0000     0. 
   8  -6   0      2.15    0.22  0. 1.0000     0. 
   8   6   0      2.43    0.14  0. 1.0000     0. 
   9  -6   0      0.66    0.10  0. 1.0000     0. 
   9  -6   0      0.66    0.14  0. 1.0000     0. 
   9  -6   0      0.71    0.08  0. 1.0000     0. 
   9  -6   0      0.53    0.09  0. 1.0000     0. 
  -9   6   0      0.57    0.21  0. 1.0000     0. 
   9   6   0      0.65    0.08  0. 1.0000     0. 
  10  -6   0      1.35    0.11  0. 1.0000     0. 
  10  -6   0      1.47    0.15  0. 1.0000     0. 
  10  -6   0      1.32    0.12  0. 1.0000     0. 
  10   6   0      1.67    0.10  0. 1.0000     0. 
   0  -7   0     -0.24    0.14  0. 1.0000     0. 
  -1  -7   0      1.06    0.22  0. 1.0000     0. 
   1  -7   0      1.13    0.22  0. 1.0000     0. 
  -1   7   0      1.53    0.19  0. 1.0000     0. 
  -1   7   0      1.25    0.17  0. 1.0000     0. 
   2  -7   0      5.24    0.43  0. 1.0000     0. 
  -2  -7   0      5.68    0.43  0. 1.0000     0. 
  -2   7   0      6.07    0.35  0. 1.0000     0. 
   3  -7   0     11.15    0.65  0. 1.0000     0. 
   4  -7   0    102.04    3.59  0. 1.0000     0. 
   5  -7   0     12.66    0.69  0. 1.0000     0. 
  -5   7   0     13.46    0.71  0. 1.0000     0. 
   6  -7   0     17.87    0.63  0. 1.0000     0. 
   6  -7   0     17.56    0.49  0. 1.0000     0. 
   6  -7   0     17.32    0.88  0. 1.0000     0. 
  -6   7   0     15.11    0.85  0. 1.0000     0. 
   7  -7   0      4.15    0.23  0. 1.0000     0. 
   7  -7   0      4.43    0.23  0. 1.0000     0. 
   7  -7   0      4.72    0.27  0. 1.0000     0. 
   7  -7   0      4.09    0.22  0. 1.0000     0. 
   7  -7   0      4.16    0.48  0. 1.0000     0. 
   7   7   0      4.17    0.19  0. 1.0000     0. 
   8  -7   0      0.59    0.11  0. 1.0000     0. 
   8  -7   0      0.54    0.23  0. 1.0000     0. 
   8  -7   0      0.83    0.15  0. 1.0000     0. 
   8  -7   0      0.60    0.10  0. 1.0000     0. 
   8   7   0      0.74    0.08  0. 1.0000     0. 
   9  -7   0      0.28    0.09  0. 1.0000     0. 
   9  -7   0      0.15    0.07  0. 1.0000     0. 
   9  -7   0      0.12    0.06  0. 1.0000     0. 
   9  -7   0      0.19    0.11  0. 1.0000     0. 
  -9   7   0      0.33    0.18  0. 1.0000     0. 
   9   7   0      0.13    0.06  0. 1.0000     0. 
  10  -7   0     12.43    0.43  0. 1.0000     0. 
  10  -7   0     13.30    0.49  0. 1.0000     0. 
  10  -7   0     12.98    0.43  0. 1.0000     0. 
  10   7   0     12.59    0.40  0. 1.0000     0. 
   0  -8   0      3.79    0.39  0. 1.0000     0. 
   0   8   0      4.10    0.26  0. 1.0000     0. 
  -1  -8   0      1.04    0.25  0. 1.0000     0. 
   1  -8   0      1.11    0.24  0. 1.0000     0. 
  -1   8   0      1.47    0.19  0. 1.0000     0. 
   2  -8   0      1.66    0.28  0. 1.0000     0. 
  -2  -8   0      1.80    0.28  0. 1.0000     0. 
  -2   8   0      1.62    0.22  0. 1.0000     0. 
   3  -8   0     29.31    1.34  0. 1.0000     0. 
   4  -8   0      8.81    0.55  0. 1.0000     0. 
   5  -8   0      0.26    0.06  0. 1.0000     0. 
   5  -8   0      0.47    0.20  0. 1.0000     0. 
   6  -8   0      1.47    0.14  0. 1.0000     0. 
   6  -8   0      1.24    0.09  0. 1.0000     0. 
   6  -8   0      0.87    0.27  0. 1.0000     0. 
   6  -8   0      1.40    0.16  0. 1.0000     0. 
   6   8   0      1.00    0.10  0. 1.0000     0. 
   7  -8   0     12.92    0.49  0. 1.0000     0. 
   7  -8   0     14.03    0.79  0. 1.0000     0. 
   7  -8   0     12.67    0.52  0. 1.0000     0. 
   7   8   0     12.70    0.43  0. 1.0000     0. 
   8  -8   0      1.88    0.19  0. 1.0000     0. 
   8  -8   0      1.87    0.18  0. 1.0000     0. 
   8   8   0      2.15    0.13  0. 1.0000     0. 
  -8   8   0      2.30    0.31  0. 1.0000     0. 
   9  -8   0     12.75    0.46  0. 1.0000     0. 
   9  -8   0     13.07    0.46  0. 1.0000     0. 
   9  -8   0     12.11    0.50  0. 1.0000     0. 
   9   8   0     13.34    0.42  0. 1.0000     0. 
  -9   8   0     11.23    0.67  0. 1.0000     0. 
  10  -8   0      2.74    0.18  0. 1.0000     0. 
  10  -8   0      2.49    0.13  0. 1.0000     0. 
   0  -9   0     -0.08    0.15  0. 1.0000     0. 
   0   9   0     -0.06    0.07  0. 1.0000     0. 
  -1  -9   0      2.69    0.37  0. 1.0000     0. 
   1  -9   0      2.02    0.33  0. 1.0000     0. 
  -1   9   0      3.71    0.27  0. 1.0000     0. 
   2  -9   0     30.32    1.40  0. 1.0000     0. 
  -2  -9   0     29.78    1.37  0. 1.0000     0. 
   3  -9   0     31.83    1.48  0. 1.0000     0. 
  -3   9   0     31.56    1.32  0. 1.0000     0. 
   4  -9   0     44.80    1.81  0. 1.0000     0. 
  -4   9   0     46.94    1.85  0. 1.0000     0. 
   5  -9   0     28.33    0.94  0. 1.0000     0. 
   5  -9   0     28.61    1.26  0. 1.0000     0. 
   5   9   0     27.89    0.87  0. 1.0000     0. 
   6  -9   0      6.10    0.52  0. 1.0000     0. 
   6  -9   0      6.11    0.28  0. 1.0000     0. 
   6  -9   0      5.75    0.20  0. 1.0000     0. 
   6  -9   0      6.05    0.30  0. 1.0000     0. 
   6   9   0      5.19    0.23  0. 1.0000     0. 
   7  -9   0     12.05    0.46  0. 1.0000     0. 
   7  -9   0     11.70    0.48  0. 1.0000     0. 
   7  -9   0     12.14    0.74  0. 1.0000     0. 
   7   9   0     10.96    0.39  0. 1.0000     0. 
   8  -9   0      0.27    0.09  0. 1.0000     0. 
   8  -9   0      0.18    0.11  0. 1.0000     0. 
   8   9   0      0.19    0.06  0. 1.0000     0. 
   9  -9   0      2.38    0.16  0. 1.0000     0. 
   9  -9   0      2.30    0.19  0. 1.0000     0. 
   9  -9   0      2.00    0.12  0. 1.0000     0. 
   9   9   0      2.13    0.08  0. 1.0000     0. 
   9   9   0      2.32    0.11  0. 1.0000     0. 
  10  -9   0      1.64    0.13  0. 1.0000     0. 
   0 -10   0    119.11    4.51  0. 1.0000     0. 
   0  10   0    117.26    3.11  0. 1.0000     0. 
  -1 -10   0     51.45    2.22  0. 1.0000     0. 
  -1  10   0     55.06    2.09  0. 1.0000     0. 
  -1  10   0     52.40    1.42  0. 1.0000     0. 
  -2 -10   0      2.01    0.36  0. 1.0000     0. 
  -2  10   0      2.40    0.11  0. 1.0000     0. 
  -2  10   0      1.98    0.26  0. 1.0000     0. 
   3  10   0      4.99    0.20  0. 1.0000     0. 
   4 -10   0      0.48    0.23  0. 1.0000     0. 
   5 -10   0      1.12    0.30  0. 1.0000     0. 
   5 -10   0      0.95    0.10  0. 1.0000     0. 
   5 -10   0      1.26    0.16  0. 1.0000     0. 
   5 -10   0      1.34    0.14  0. 1.0000     0. 
   5  10   0      1.22    0.12  0. 1.0000     0. 
   6 -10   0     12.50    0.47  0. 1.0000     0. 
   6 -10   0     12.05    0.49  0. 1.0000     0. 
   6 -10   0     12.22    0.37  0. 1.0000     0. 
   6 -10   0     12.06    0.74  0. 1.0000     0. 
   6  10   0     11.99    0.41  0. 1.0000     0. 
   7 -10   0      7.22    0.32  0. 1.0000     0. 
   7 -10   0      6.97    0.32  0. 1.0000     0. 
   7 -10   0      7.37    0.35  0. 1.0000     0. 
   7  10   0      7.11    0.26  0. 1.0000     0. 
   8 -10   0      9.96    0.43  0. 1.0000     0. 
   8 -10   0     10.64    0.41  0. 1.0000     0. 
   8  10   0     11.35    0.36  0. 1.0000     0. 
   9 -10   0     26.47    0.87  0. 1.0000     0. 
   9 -10   0     28.14    0.93  0. 1.0000     0. 
   9  10   0     26.67    0.81  0. 1.0000     0. 
  -2  11   0      0.48    0.06  0. 1.0000     0. 
   2  11   0      0.46    0.07  0. 1.0000     0. 
  -3  11   0     70.12    2.20  0. 1.0000     0. 
  -3  11   0     69.04    1.87  0. 1.0000     0. 
   3  11   0     68.60    2.32  0. 1.0000     0. 
   3  11   0     66.29    2.16  0. 1.0000     0. 
   3  11   0     73.97    2.33  0. 1.0000     0. 
   3  11   0     70.02    2.08  0. 1.0000     0. 
   4 -11   0     27.41    1.24  0. 1.0000     0. 
  -4  11   0     26.27    0.90  0. 1.0000     0. 
   4  11   0     27.04    0.84  0. 1.0000     0. 
   5 -11   0      5.74    0.31  0. 1.0000     0. 
   5 -11   0      6.09    0.30  0. 1.0000     0. 
   5 -11   0      6.36    0.54  0. 1.0000     0. 
   5 -11   0      5.79    0.23  0. 1.0000     0. 
   5  11   0      6.96    0.25  0. 1.0000     0. 
   6 -11   0      5.64    0.19  0. 1.0000     0. 
   6 -11   0      5.79    0.28  0. 1.0000     0. 
   6 -11   0      5.84    0.30  0. 1.0000     0. 
   6  11   0      5.25    0.22  0. 1.0000     0. 
   7 -11   0      4.67    0.25  0. 1.0000     0. 
   7 -11   0      4.98    0.27  0. 1.0000     0. 
   7 -11   0      4.68    0.25  0. 1.0000     0. 
   7  11   0      4.85    0.19  0. 1.0000     0. 
   8 -11   0      0.62    0.12  0. 1.0000     0. 
   8 -11   0      0.52    0.09  0. 1.0000     0. 
   8  11   0      0.50    0.04  0. 1.0000     0. 
   8  11   0      0.56    0.06  0. 1.0000     0. 
   9 -11   0      1.81    0.14  0. 1.0000     0. 
   9 -11   0      1.73    0.12  0. 1.0000     0. 
   0  12   0      7.11    0.28  0. 1.0000     0. 
   0  12   0      7.22    0.30  0. 1.0000     0. 
   1  12   0      9.13    0.36  0. 1.0000     0. 
   1  12   0      9.26    0.35  0. 1.0000     0. 
   1  12   0      9.43    0.34  0. 1.0000     0. 
  -1  12   0      8.96    0.34  0. 1.0000     0. 
  -1  12   0      9.47    0.37  0. 1.0000     0. 
  -2  12   0      0.31    0.05  0. 1.0000     0. 
   2  12   0      0.21    0.07  0. 1.0000     0. 
  -2  12   0      0.18    0.09  0. 1.0000     0. 
   2  12   0      0.21    0.05  0. 1.0000     0. 
   2  12   0      0.28    0.07  0. 1.0000     0. 
   3 -12   0      0.17    0.22  0. 1.0000     0. 
  -3  12   0      0.16    0.08  0. 1.0000     0. 
   3  12   0      0.00    0.06  0. 1.0000     0. 
  -3  12   0      0.22    0.05  0. 1.0000     0. 
   4 -12   0      0.70    0.27  0. 1.0000     0. 
   4  12   0      0.59    0.08  0. 1.0000     0. 
  -4  12   0      0.42    0.10  0. 1.0000     0. 
  -4  12   0      0.58    0.07  0. 1.0000     0. 
   5 -12   0     14.55    0.45  0. 1.0000     0. 
   5 -12   0     15.10    0.57  0. 1.0000     0. 
   5  12   0     15.05    0.49  0. 1.0000     0. 
  -5  12   0     14.49    0.44  0. 1.0000     0. 
   6 -12   0      0.62    0.11  0. 1.0000     0. 
   6 -12   0      0.58    0.06  0. 1.0000     0. 
   6 -12   0      0.68    0.12  0. 1.0000     0. 
   6  12   0      0.62    0.07  0. 1.0000     0. 
  -6  12   0      0.56    0.07  0. 1.0000     0. 
   7 -12   0      3.52    0.22  0. 1.0000     0. 
   7 -12   0      3.85    0.21  0. 1.0000     0. 
   7 -12   0      3.73    0.21  0. 1.0000     0. 
  -7  12   0      3.70    0.14  0. 1.0000     0. 
   7  12   0      4.11    0.16  0. 1.0000     0. 
   8 -12   0      5.13    0.22  0. 1.0000     0. 
   8 -12   0      4.87    0.24  0. 1.0000     0. 
   8  12   0      4.70    0.17  0. 1.0000     0. 
   0  13   0     -0.08    0.07  0. 1.0000     0. 
   0  13   0      0.00    0.06  0. 1.0000     0. 
   1  13   0      0.77    0.10  0. 1.0000     0. 
   1  13   0      0.83    0.09  0. 1.0000     0. 
   1  13   0      0.75    0.09  0. 1.0000     0. 
  -1  13   0      1.28    0.13  0. 1.0000     0. 
  -1  13   0      0.95    0.10  0. 1.0000     0. 
  -2  13   0      4.49    0.24  0. 1.0000     0. 
   2  13   0      4.39    0.21  0. 1.0000     0. 
   2  13   0      4.50    0.20  0. 1.0000     0. 
   2  13   0      4.47    0.18  0. 1.0000     0. 
   2  13   0      4.46    0.18  0. 1.0000     0. 
   3 -13   0      4.02    0.48  0. 1.0000     0. 
  -3  13   0      4.21    0.23  0. 1.0000     0. 
  -3  13   0      3.99    0.13  0. 1.0000     0. 
   4  13   0      6.88    0.27  0. 1.0000     0. 
  -4  13   0      7.59    0.23  0. 1.0000     0. 
  -4  13   0      7.51    0.32  0. 1.0000     0. 
   5 -13   0      0.43    0.07  0. 1.0000     0. 
  -5  13   0      0.18    0.09  0. 1.0000     0. 
  -5  13   0      0.33    0.05  0. 1.0000     0. 
   6 -13   0      7.03    0.31  0. 1.0000     0. 
   6 -13   0      6.75    0.30  0. 1.0000     0. 
  -6  13   0      7.35    0.22  0. 1.0000     0. 
   6  13   0      6.85    0.25  0. 1.0000     0. 
   7 -13   0      0.19    0.08  0. 1.0000     0. 
   7 -13   0      0.10    0.07  0. 1.0000     0. 
   7  13   0      0.07    0.04  0. 1.0000     0. 
   0  14   0      0.67    0.08  0. 1.0000     0. 
   0  14   0      0.47    0.08  0. 1.0000     0. 
   0  14   0      0.47    0.09  0. 1.0000     0. 
  -1  14   0     20.25    0.67  0. 1.0000     0. 
   1  14   0     18.79    0.65  0. 1.0000     0. 
   1  14   0     18.45    0.68  0. 1.0000     0. 
  -1  14   0     19.45    0.63  0. 1.0000     0. 
   1  14   0     19.68    0.63  0. 1.0000     0. 
   2  14   0      7.63    0.29  0. 1.0000     0. 
  -2  14   0      7.92    0.33  0. 1.0000     0. 
   2  14   0      7.26    0.29  0. 1.0000     0. 
  -3  14   0      0.53    0.10  0. 1.0000     0. 
   4  14   0      2.24    0.13  0. 1.0000     0. 
  -4  14   0      2.78    0.18  0. 1.0000     0. 
   5 -14   0      2.93    0.13  0. 1.0000     0. 
  -5  14   0      2.62    0.18  0. 1.0000     0. 
   5  14   0      2.95    0.14  0. 1.0000     0. 
   6 -14   0      0.23    0.08  0. 1.0000     0. 
   6 -14   0      0.18    0.08  0. 1.0000     0. 
  -6  14   0      0.25    0.07  0. 1.0000     0. 
   6  14   0      0.24    0.05  0. 1.0000     0. 
   0  15   0      0.00    0.05  0. 1.0000     0. 
   0  15   0      0.08    0.06  0. 1.0000     0. 
   0  15   0      0.10    0.07  0. 1.0000     0. 
  -1  15   0      1.37    0.14  0. 1.0000     0. 
  -1  15   0      1.91    0.13  0. 1.0000     0. 
  -2  15   0     15.04    0.53  0. 1.0000     0. 
   2  15   0     14.73    0.49  0. 1.0000     0. 
  -3  15   0      5.26    0.25  0. 1.0000     0. 
   3  15   0      5.47    0.22  0. 1.0000     0. 
   4 -15   0      0.32    0.06  0. 1.0000     0. 
   4  15   0      0.00    0.05  0. 1.0000     0. 
  -4  15   0      0.24    0.08  0. 1.0000     0. 
  -5  15   0      0.03    0.06  0. 1.0000     0. 
   5  15   0      0.16    0.05  0. 1.0000     0. 
   6  15   0      0.36    0.05  0. 1.0000     0. 
   0  16   0      0.19    0.07  0. 1.0000     0. 
   0  16   0      0.02    0.05  0. 1.0000     0. 
  -1  16   0      3.59    0.18  0. 1.0000     0. 
   1  16   0      3.34    0.17  0. 1.0000     0. 
   1  16   0      3.66    0.16  0. 1.0000     0. 
  -1  16   0      3.69    0.16  0. 1.0000     0. 
   2  16   0     11.20    0.38  0. 1.0000     0. 
  -2  16   0     11.37    0.40  0. 1.0000     0. 
  -2  16   0     10.85    0.41  0. 1.0000     0. 
   3  16   0      1.12    0.10  0. 1.0000     0. 
  -3  16   0      1.21    0.12  0. 1.0000     0. 
  -4  16   0      2.70    0.16  0. 1.0000     0. 
   4  16   0      3.04    0.13  0. 1.0000     0. 
   5  16   0     12.14    0.38  0. 1.0000     0. 
   0  17   0      0.01    0.04  0. 1.0000     0. 
   0  17   0     -0.03    0.04  0. 1.0000     0. 
   1  17   0      1.38    0.10  0. 1.0000     0. 
  -1  17   0      1.22    0.10  0. 1.0000     0. 
   2  17   0      8.21    0.28  0. 1.0000     0. 
  -2  17   0      8.33    0.30  0. 1.0000     0. 
   3  17   0      2.22    0.11  0. 1.0000     0. 
  -3  17   0      2.48    0.13  0. 1.0000     0. 
  11   0  -1     -0.01    0.05  0. 1.0000     0. 
  11   0  -1     -0.09    0.05  0. 1.0000     0. 
 -10   0   1      0.01    0.15  0. 1.0000     0. 
  10   0  -1      0.01    0.06  0. 1.0000     0. 
  -9   0   1     -0.02    0.16  0. 1.0000     0. 
   9   0  -1      0.06    0.06  0. 1.0000     0. 
   8   0  -1     -0.04    0.06  0. 1.0000     0. 
   8   0  -1      0.00    0.09  0. 1.0000     0. 
   8   0  -1      0.00    0.06  0. 1.0000     0. 
   8   0  -1      0.01    0.03  0. 1.0000     0. 
   8   0  -1      0.02    0.04  0. 1.0000     0. 
  -8   0   1      0.10    0.16  0. 1.0000     0. 
   8   0  -1     -0.05    0.16  0. 1.0000     0. 
   7   0  -1      0.00    0.13  0. 1.0000     0. 
   7   0  -1      0.04    0.06  0. 1.0000     0. 
   7   0  -1      0.06    0.05  0. 1.0000     0. 
  -7   0   1      0.21    0.17  0. 1.0000     0. 
  -7   0   1      0.05    0.14  0. 1.0000     0. 
  -6   0   1      0.10    0.15  0. 1.0000     0. 
   6   0  -1     -0.01    0.11  0. 1.0000     0. 
   5   0  -1      0.03    0.11  0. 1.0000     0. 
  -5   0   1      0.18    0.13  0. 1.0000     0. 
  -4   0   1      0.33    0.13  0. 1.0000     0. 
   4   0  -1      0.05    0.10  0. 1.0000     0. 
  -3   0   1      0.50    0.10  0. 1.0000     0. 
   2   0  -1     -0.24    0.07  0. 1.0000     0. 
  -2   0   1     -0.29    0.07  0. 1.0000     0. 
   2   0  -1     -0.26    0.06  0. 1.0000     0. 
   1   0  -1     -0.60    0.03  0. 1.0000     0. 
  -1   0   1     -0.52    0.03  0. 1.0000     0. 
   1   0  -1     -0.53    0.03  0. 1.0000     0. 
   0   0   1      0.01    0.01  0. 1.0000     0. 
  -2   0  -1     -0.04    0.05  0. 1.0000     0. 
  -3   0  -1      0.13    0.07  0. 1.0000     0. 
   4   0   1      0.15    0.11  0. 1.0000     0. 
  -4   0  -1      0.14    0.11  0. 1.0000     0. 
  -4   0  -1      0.03    0.08  0. 1.0000     0. 
  -5   0  -1     -0.01    0.12  0. 1.0000     0. 
   5   0   1      0.19    0.13  0. 1.0000     0. 
   6   0   1      0.00    0.12  0. 1.0000     0. 
  -6   0  -1      0.06    0.14  0. 1.0000     0. 
   7   0   1      0.02    0.04  0. 1.0000     0. 
   7   0   1      0.02    0.06  0. 1.0000     0. 
   7   0   1      0.06    0.13  0. 1.0000     0. 
   7   0   1      0.00    0.04  0. 1.0000     0. 
  -8   0  -1      0.19    0.16  0. 1.0000     0. 
   8   0   1      0.76    0.23  0. 1.0000     0. 
  -9   0  -1      0.24    0.16  0. 1.0000     0. 
 -10   0  -1      0.40    0.18  0. 1.0000     0. 
  10   0   1      0.08    0.06  0. 1.0000     0. 
  11   0   1     -0.05    0.05  0. 1.0000     0. 
  11   0   1      0.05    0.05  0. 1.0000     0. 
  11  -1  -1      1.82    0.11  0. 1.0000     0. 
  11  -1  -1      1.71    0.11  0. 1.0000     0. 
  11   1  -1      1.32    0.10  0. 1.0000     0. 
  10  -1  -1      6.78    0.27  0. 1.0000     0. 
 -10  -1   1      7.35    0.47  0. 1.0000     0. 
  10   1  -1      7.11    0.27  0. 1.0000     0. 
 -10   1   1      7.40    0.49  0. 1.0000     0. 
  -9  -1   1      0.96    0.23  0. 1.0000     0. 
   9  -1  -1      1.47    0.28  0. 1.0000     0. 
   9  -1  -1      1.29    0.12  0. 1.0000     0. 
   9  -1  -1      1.29    0.15  0. 1.0000     0. 
  -9   1   1      0.97    0.23  0. 1.0000     0. 
   9   1  -1      0.93    0.10  0. 1.0000     0. 
   8  -1  -1      4.10    0.40  0. 1.0000     0. 
   8  -1  -1      3.63    0.19  0. 1.0000     0. 
   8  -1  -1      3.88    0.18  0. 1.0000     0. 
   8  -1  -1      3.69    0.19  0. 1.0000     0. 
  -8  -1   1      4.00    0.39  0. 1.0000     0. 
   8  -1  -1      3.83    0.25  0. 1.0000     0. 
   8   1  -1      3.71    0.18  0. 1.0000     0. 
  -8   1   1      4.48    0.41  0. 1.0000     0. 
  -7  -1   1      5.62    0.45  0. 1.0000     0. 
  -7  -1   1      5.82    0.42  0. 1.0000     0. 
   7  -1  -1      5.55    0.42  0. 1.0000     0. 
   7   1  -1      5.98    0.22  0. 1.0000     0. 
   7   1  -1      5.31    0.23  0. 1.0000     0. 
   7   1  -1      4.83    0.40  0. 1.0000     0. 
  -7   1   1      5.24    0.44  0. 1.0000     0. 
   6  -1  -1     15.75    0.75  0. 1.0000     0. 
  -6  -1   1     16.99    0.78  0. 1.0000     0. 
   6   1  -1     16.22    0.74  0. 1.0000     0. 
  -6   1   1     15.92    0.77  0. 1.0000     0. 
   5  -1  -1     43.85    1.59  0. 1.0000     0. 
  -5  -1   1     42.13    1.62  0. 1.0000     0. 
  -5   1   1     41.50    1.61  0. 1.0000     0. 
   5   1  -1     44.49    1.58  0. 1.0000     0. 
   4  -1  -1     -0.10    0.10  0. 1.0000     0. 
  -4  -1   1      0.06    0.12  0. 1.0000     0. 
   4  -1  -1     -0.03    0.07  0. 1.0000     0. 
   4  -1  -1     -0.03    0.07  0. 1.0000     0. 
  -4   1   1      0.05    0.12  0. 1.0000     0. 
   4   1  -1      0.11    0.11  0. 1.0000     0. 
  -3  -1   1      0.19    0.10  0. 1.0000     0. 
   3  -1  -1     -0.06    0.05  0. 1.0000     0. 
  -3  -1   1      0.12    0.08  0. 1.0000     0. 
   3  -1  -1     -0.04    0.06  0. 1.0000     0. 
  -3   1   1      0.07    0.07  0. 1.0000     0. 
  -3   1   1      0.13    0.10  0. 1.0000     0. 
  -2  -1   1     12.10    0.58  0. 1.0000     0. 
   2  -1  -1     12.43    0.58  0. 1.0000     0. 
  -2  -1   1     13.61    0.59  0. 1.0000     0. 
   2  -1  -1     13.48    0.50  0. 1.0000     0. 
   2  -1  -1     12.94    0.53  0. 1.0000     0. 
   2   1  -1     13.03    0.50  0. 1.0000     0. 
   2   1  -1     12.21    0.50  0. 1.0000     0. 
  -2   1   1     12.55    0.60  0. 1.0000     0. 
  -1  -1   1      0.68    0.06  0. 1.0000     0. 
   1  -1  -1      0.63    0.08  0. 1.0000     0. 
  -1  -1   1      0.71    0.08  0. 1.0000     0. 
   1  -1  -1      0.75    0.07  0. 1.0000     0. 
  -1  -1   1      0.84    0.07  0. 1.0000     0. 
  -1   1   1      0.65    0.08  0. 1.0000     0. 
   1   1  -1      0.71    0.06  0. 1.0000     0. 
   1   1  -1      0.68    0.06  0. 1.0000     0. 
   1   1  -1      0.66    0.08  0. 1.0000     0. 
   1  -1   1     12.13    0.49  0. 1.0000     0. 
  -1  -1  -1     12.76    0.54  0. 1.0000     0. 
   1  -1   1     13.12    0.48  0. 1.0000     0. 
  -1  -1  -1     13.04    0.47  0. 1.0000     0. 
  -1   1  -1     12.72    0.56  0. 1.0000     0. 
   1   1   1     12.19    0.53  0. 1.0000     0. 
   2  -1   1     32.42    1.15  0. 1.0000     0. 
  -2  -1  -1     31.47    1.32  0. 1.0000     0. 
   2  -1   1     33.83    1.21  0. 1.0000     0. 
  -2   1  -1     29.82    1.37  0. 1.0000     0. 
   3  -1   1      4.98    0.24  0. 1.0000     0. 
   3  -1   1      4.84    0.23  0. 1.0000     0. 
  -3  -1  -1      5.12    0.31  0. 1.0000     0. 
  -3  -1  -1      5.12    0.26  0. 1.0000     0. 
  -3   1  -1      4.79    0.27  0. 1.0000     0. 
  -3   1  -1      4.96    0.29  0. 1.0000     0. 
  -4  -1  -1     90.84    3.84  0. 1.0000     0. 
  -4  -1  -1     94.79    3.14  0. 1.0000     0. 
   4  -1   1     87.09    3.09  0. 1.0000     0. 
  -4   1  -1     93.60    3.14  0. 1.0000     0. 
   4   1   1     87.07    3.09  0. 1.0000     0. 
   5  -1   1      1.22    0.18  0. 1.0000     0. 
  -5  -1  -1      0.52    0.15  0. 1.0000     0. 
   5   1   1      0.62    0.16  0. 1.0000     0. 
   6  -1   1      2.91    0.30  0. 1.0000     0. 
  -6  -1  -1      3.56    0.33  0. 1.0000     0. 
  -6   1  -1      3.18    0.32  0. 1.0000     0. 
   6   1   1      3.60    0.30  0. 1.0000     0. 
   7  -1   1      4.17    0.18  0. 1.0000     0. 
   7  -1   1      3.79    0.36  0. 1.0000     0. 
   7   1   1      3.84    0.19  0. 1.0000     0. 
   7   1   1      3.55    0.36  0. 1.0000     0. 
   8  -1   1      2.57    0.36  0. 1.0000     0. 
   8  -1   1      2.80    0.16  0. 1.0000     0. 
   8  -1   1      2.45    0.21  0. 1.0000     0. 
  -8  -1  -1      2.37    0.32  0. 1.0000     0. 
   8  -1   1      2.46    0.15  0. 1.0000     0. 
   8   1   1      2.58    0.17  0. 1.0000     0. 
   8   1   1      2.60    0.15  0. 1.0000     0. 
   9  -1   1      0.52    0.22  0. 1.0000     0. 
   9  -1   1      0.33    0.07  0. 1.0000     0. 
  -9  -1  -1      0.32    0.18  0. 1.0000     0. 
  -9   1  -1      0.39    0.19  0. 1.0000     0. 
   9   1   1      0.36    0.07  0. 1.0000     0. 
  10  -1   1      0.69    0.08  0. 1.0000     0. 
  10   1   1      0.87    0.09  0. 1.0000     0. 
 -10   1  -1      0.64    0.20  0. 1.0000     0. 
  11  -1   1      0.19    0.05  0. 1.0000     0. 
  11  -2  -1      9.88    0.34  0. 1.0000     0. 
  11   2  -1      9.87    0.33  0. 1.0000     0. 
  10  -2  -1      2.02    0.14  0. 1.0000     0. 
  10  -2  -1      2.22    0.19  0. 1.0000     0. 
 -10   2   1      2.41    0.31  0. 1.0000     0. 
  10   2  -1      2.23    0.13  0. 1.0000     0. 
  10   2  -1      1.99    0.13  0. 1.0000     0. 
   9  -2  -1      1.02    0.26  0. 1.0000     0. 
  -9  -2   1      0.89    0.21  0. 1.0000     0. 
   9  -2  -1      1.01    0.11  0. 1.0000     0. 
   9  -2  -1      1.07    0.10  0. 1.0000     0. 
   9  -2  -1      1.15    0.15  0. 1.0000     0. 
  -9   2   1      0.88    0.23  0. 1.0000     0. 
   9   2  -1      1.11    0.10  0. 1.0000     0. 
   8  -2  -1      2.66    0.21  0. 1.0000     0. 
   8  -2  -1      2.61    0.16  0. 1.0000     0. 
   8  -2  -1      2.40    0.34  0. 1.0000     0. 
   8  -2  -1      2.46    0.15  0. 1.0000     0. 
  -8  -2   1      2.44    0.32  0. 1.0000     0. 
   8  -2  -1      2.41    0.16  0. 1.0000     0. 
   8   2  -1      2.42    0.15  0. 1.0000     0. 
  -8   2   1      2.09    0.31  0. 1.0000     0. 
   7  -2  -1      0.74    0.09  0. 1.0000     0. 
   7  -2  -1      0.51    0.19  0. 1.0000     0. 
  -7  -2   1      0.90    0.20  0. 1.0000     0. 
  -7  -2   1      0.46    0.21  0. 1.0000     0. 
  -7   2   1      0.88    0.24  0. 1.0000     0. 
   7   2  -1      0.67    0.10  0. 1.0000     0. 
   7   2  -1      0.71    0.06  0. 1.0000     0. 
   6  -2  -1     12.85    0.62  0. 1.0000     0. 
  -6  -2   1     12.17    0.64  0. 1.0000     0. 
  -6  -2   1     11.50    0.57  0. 1.0000     0. 
  -6   2   1     11.70    0.63  0. 1.0000     0. 
   6   2  -1     11.65    0.60  0. 1.0000     0. 
   6   2  -1     11.04    0.59  0. 1.0000     0. 
  -5  -2   1      2.05    0.26  0. 1.0000     0. 
   5  -2  -1      1.63    0.15  0. 1.0000     0. 
   5  -2  -1      1.17    0.20  0. 1.0000     0. 
   5  -2  -1      1.36    0.15  0. 1.0000     0. 
   5   2  -1      1.34    0.21  0. 1.0000     0. 
  -5   2   1      1.54    0.22  0. 1.0000     0. 
   4  -2  -1     51.92    1.88  0. 1.0000     0. 
  -4   2   1     53.51    1.91  0. 1.0000     0. 
   4   2  -1     53.97    1.88  0. 1.0000     0. 
  -3  -2   1     19.07    0.86  0. 1.0000     0. 
  -3  -2   1     18.21    0.84  0. 1.0000     0. 
   3  -2  -1     18.57    0.73  0. 1.0000     0. 
   3  -2  -1     17.81    0.76  0. 1.0000     0. 
  -3   2   1     19.47    0.74  0. 1.0000     0. 
   2  -2  -1     45.59    1.58  0. 1.0000     0. 
  -2  -2   1     44.40    1.57  0. 1.0000     0. 
   2  -2  -1     43.39    1.87  0. 1.0000     0. 
  -2  -2   1     41.05    1.84  0. 1.0000     0. 
  -2  -2   1     44.05    1.79  0. 1.0000     0. 
   2   2  -1     42.71    1.79  0. 1.0000     0. 
  -2   2   1     44.45    1.52  0. 1.0000     0. 
  -2   2   1     41.76    1.66  0. 1.0000     0. 
   1  -2  -1     85.98    3.68  0. 1.0000     0. 
  -1  -2   1     90.01    3.66  0. 1.0000     0. 
   1  -2  -1     90.55    3.10  0. 1.0000     0. 
  -1  -2   1     90.33    3.47  0. 1.0000     0. 
  -1  -2   1     84.35    3.66  0. 1.0000     0. 
  -1  -2   1     93.88    3.11  0. 1.0000     0. 
  -1   2   1     86.30    3.23  0. 1.0000     0. 
  -1   2   1     85.49    3.47  0. 1.0000     0. 
   1   2  -1     85.37    3.47  0. 1.0000     0. 
   1   2  -1     89.22    3.21  0. 1.0000     0. 
   1   2  -1     84.85    3.21  0. 1.0000     0. 
  -1   2   1     84.02    3.68  0. 1.0000     0. 
   0  -2  -1    143.73    5.65  0. 1.0000     0. 
   0  -2   1    150.27    5.99  0. 1.0000     0. 
   0  -2  -1    145.42    5.98  0. 1.0000     0. 
   0  -2  -1    150.54    5.05  0. 1.0000     0. 
   0  -2   1    139.21    5.65  0. 1.0000     0. 
   0   2   1    139.68    5.24  0. 1.0000     0. 
   0   2  -1    140.74    5.65  0. 1.0000     0. 
   0   2  -1    138.06    5.98  0. 1.0000     0. 
   0   2   1    146.84    5.97  0. 1.0000     0. 
   0   2   1    137.73    5.65  0. 1.0000     0. 
   0   2  -1    144.72    5.25  0. 1.0000     0. 
  -1  -2  -1    116.50    3.95  0. 1.0000     0. 
   1  -2   1    117.33    4.43  0. 1.0000     0. 
   1  -2   1    112.31    4.69  0. 1.0000     0. 
  -1  -2  -1    109.47    4.42  0. 1.0000     0. 
   1  -2   1    117.33    3.96  0. 1.0000     0. 
  -1   2  -1    109.66    4.12  0. 1.0000     0. 
   1   2   1    103.89    4.42  0. 1.0000     0. 
  -1   2  -1    109.37    4.43  0. 1.0000     0. 
   2  -2   1    124.44    4.39  0. 1.0000     0. 
  -2  -2  -1    116.74    4.72  0. 1.0000     0. 
  -2  -2  -1    119.54    4.19  0. 1.0000     0. 
   2  -2   1    127.01    4.22  0. 1.0000     0. 
   2   2   1    110.87    4.72  0. 1.0000     0. 
  -2   2  -1    121.45    4.73  0. 1.0000     0. 
  -2   2  -1    112.97    5.00  0. 1.0000     0. 
   3  -2   1      1.52    0.15  0. 1.0000     0. 
   3  -2   1      1.49    0.14  0. 1.0000     0. 
  -3  -2  -1      1.59    0.18  0. 1.0000     0. 
  -3   2  -1      1.54    0.18  0. 1.0000     0. 
  -3   2  -1      1.94    0.18  0. 1.0000     0. 
   4  -2   1     18.79    0.76  0. 1.0000     0. 
   4  -2   1     18.81    0.76  0. 1.0000     0. 
  -4  -2  -1     18.17    0.86  0. 1.0000     0. 
   4   2   1     20.62    0.77  0. 1.0000     0. 
  -4   2  -1     18.65    0.77  0. 1.0000     0. 
   5  -2   1      4.62    0.33  0. 1.0000     0. 
  -5  -2  -1      4.10    0.33  0. 1.0000     0. 
  -5   2  -1      4.41    0.33  0. 1.0000     0. 
   5   2   1      5.07    0.33  0. 1.0000     0. 
  -6  -2  -1      0.48    0.17  0. 1.0000     0. 
   6  -2   1      0.17    0.14  0. 1.0000     0. 
   6   2   1      0.48    0.16  0. 1.0000     0. 
  -6   2  -1      0.13    0.14  0. 1.0000     0. 
   6   2   1      0.33    0.14  0. 1.0000     0. 
  -7  -2  -1     10.56    0.58  0. 1.0000     0. 
   7  -2   1     11.65    0.42  0. 1.0000     0. 
   7  -2   1     10.38    0.61  0. 1.0000     0. 
   7   2   1     10.79    0.39  0. 1.0000     0. 
   8  -2   1      0.37    0.05  0. 1.0000     0. 
  -8  -2  -1      0.06    0.15  0. 1.0000     0. 
   8  -2   1      0.48    0.21  0. 1.0000     0. 
   9  -2   1      8.74    0.60  0. 1.0000     0. 
   9  -2   1      8.64    0.40  0. 1.0000     0. 
   9  -2   1      9.12    0.34  0. 1.0000     0. 
  -9   2  -1      7.97    0.56  0. 1.0000     0. 
   9   2   1      9.98    0.33  0. 1.0000     0. 
  10  -2   1      0.55    0.08  0. 1.0000     0. 
 -10   2  -1      0.28    0.18  0. 1.0000     0. 
  10   2   1      0.42    0.07  0. 1.0000     0. 
  11  -2   1      0.01    0.05  0. 1.0000     0. 
  11   2   1      0.13    0.05  0. 1.0000     0. 
  11  -3  -1      0.19    0.06  0. 1.0000     0. 
  11   3  -1      0.20    0.05  0. 1.0000     0. 
  10  -3  -1     13.26    0.45  0. 1.0000     0. 
  10  -3  -1     13.66    0.52  0. 1.0000     0. 
  10   3  -1     13.10    0.44  0. 1.0000     0. 
 -10   3   1     14.16    0.70  0. 1.0000     0. 
   9  -3  -1      0.10    0.04  0. 1.0000     0. 
   9  -3  -1      0.15    0.07  0. 1.0000     0. 
   9  -3  -1      0.18    0.07  0. 1.0000     0. 
   9  -3  -1      0.04    0.10  0. 1.0000     0. 
  -9   3   1     -0.05    0.15  0. 1.0000     0. 
   9   3  -1      0.13    0.06  0. 1.0000     0. 
   8  -3  -1      1.04    0.25  0. 1.0000     0. 
   8  -3  -1      1.14    0.11  0. 1.0000     0. 
   8  -3  -1      1.02    0.11  0. 1.0000     0. 
   8  -3  -1      1.12    0.15  0. 1.0000     0. 
   8  -3  -1      0.86    0.10  0. 1.0000     0. 
   8   3  -1      0.93    0.09  0. 1.0000     0. 
  -8   3   1      1.10    0.25  0. 1.0000     0. 
   7  -3  -1      2.18    0.31  0. 1.0000     0. 
  -7  -3   1      2.10    0.32  0. 1.0000     0. 
  -7   3   1      2.11    0.32  0. 1.0000     0. 
   6  -3  -1     10.56    0.57  0. 1.0000     0. 
  -6  -3   1      9.78    0.58  0. 1.0000     0. 
  -6   3   1     11.12    0.60  0. 1.0000     0. 
   5  -3  -1     64.72    2.26  0. 1.0000     0. 
   5  -3  -1     65.20    2.40  0. 1.0000     0. 
  -5   3   1     59.69    2.28  0. 1.0000     0. 
   5   3  -1     61.52    2.25  0. 1.0000     0. 
   4  -3  -1     23.24    0.93  0. 1.0000     0. 
  -4   3   1     23.88    0.95  0. 1.0000     0. 
  -3  -3   1     43.28    1.80  0. 1.0000     0. 
  -3  -3   1     41.35    1.83  0. 1.0000     0. 
   3  -3  -1     42.39    1.59  0. 1.0000     0. 
  -3   3   1     42.60    1.53  0. 1.0000     0. 
  -2  -3   1      9.36    0.43  0. 1.0000     0. 
  -2  -3   1     10.06    0.49  0. 1.0000     0. 
   2  -3  -1      9.75    0.50  0. 1.0000     0. 
   2  -3  -1     10.42    0.45  0. 1.0000     0. 
  -2  -3   1     10.03    0.46  0. 1.0000     0. 
  -2   3   1      9.78    0.43  0. 1.0000     0. 
  -2   3   1     10.13    0.46  0. 1.0000     0. 
   2   3  -1      9.01    0.49  0. 1.0000     0. 
  -2   3   1      9.33    0.49  0. 1.0000     0. 
  -2   3   1      9.03    0.50  0. 1.0000     0. 
  -1  -3   1     57.93    1.99  0. 1.0000     0. 
   1  -3  -1     58.33    2.22  0. 1.0000     0. 
   1  -3  -1     56.58    1.99  0. 1.0000     0. 
  -1  -3   1     55.34    2.21  0. 1.0000     0. 
   1  -3  -1     53.92    2.33  0. 1.0000     0. 
  -1  -3   1     52.86    2.31  0. 1.0000     0. 
  -1   3   1     51.74    2.33  0. 1.0000     0. 
   1   3  -1     53.12    2.02  0. 1.0000     0. 
  -1   3   1     52.51    2.21  0. 1.0000     0. 
   1   3  -1     54.73    2.22  0. 1.0000     0. 
   1   3  -1     54.37    2.02  0. 1.0000     0. 
  -1   3   1     53.18    2.05  0. 1.0000     0. 
   0  -3  -1    116.04    4.39  0. 1.0000     0. 
   0  -3   1    109.81    4.64  0. 1.0000     0. 
   0  -3  -1    111.59    3.92  0. 1.0000     0. 
   0  -3   1    114.52    3.93  0. 1.0000     0. 
   0  -3   1    110.41    4.39  0. 1.0000     0. 
   0  -3  -1    110.92    4.62  0. 1.0000     0. 
   0   3  -1    109.31    4.06  0. 1.0000     0. 
   0   3   1    106.78    4.38  0. 1.0000     0. 
   0   3   1    106.37    4.05  0. 1.0000     0. 
   0   3  -1    108.70    4.39  0. 1.0000     0. 
  -1  -3  -1      0.85    0.13  0. 1.0000     0. 
  -1  -3  -1      0.65    0.09  0. 1.0000     0. 
   1  -3   1      0.98    0.15  0. 1.0000     0. 
  -1  -3  -1      0.75    0.12  0. 1.0000     0. 
  -1  -3  -1      0.71    0.08  0. 1.0000     0. 
   1  -3   1      0.72    0.12  0. 1.0000     0. 
   1   3   1      0.81    0.13  0. 1.0000     0. 
  -1   3  -1      0.94    0.14  0. 1.0000     0. 
   2  -3   1     18.22    0.77  0. 1.0000     0. 
  -2  -3  -1     19.93    0.74  0. 1.0000     0. 
  -2  -3  -1     19.98    0.84  0. 1.0000     0. 
   2  -3   1     19.90    0.77  0. 1.0000     0. 
   2   3   1     17.83    0.84  0. 1.0000     0. 
  -2   3  -1     18.25    0.87  0. 1.0000     0. 
  -2   3  -1     17.95    0.78  0. 1.0000     0. 
  -2   3  -1     18.75    0.72  0. 1.0000     0. 
  -2   3  -1     18.76    0.84  0. 1.0000     0. 
   3  -3   1      7.56    0.39  0. 1.0000     0. 
  -3  -3  -1      8.08    0.44  0. 1.0000     0. 
  -3   3  -1      7.51    0.38  0. 1.0000     0. 
  -4  -3  -1      1.19    0.15  0. 1.0000     0. 
   4  -3   1      1.81    0.21  0. 1.0000     0. 
  -4   3  -1      1.54    0.20  0. 1.0000     0. 
   5  -3   1      0.97    0.12  0. 1.0000     0. 
   5  -3   1      1.11    0.20  0. 1.0000     0. 
   5  -3   1      0.72    0.11  0. 1.0000     0. 
  -5   3  -1      0.80    0.17  0. 1.0000     0. 
   5   3   1      0.49    0.16  0. 1.0000     0. 
   6  -3   1     42.49    1.65  0. 1.0000     0. 
  -6  -3  -1     43.09    1.68  0. 1.0000     0. 
   6   3   1     43.22    1.66  0. 1.0000     0. 
  -6   3  -1     44.12    1.68  0. 1.0000     0. 
   7  -3   1      0.92    0.11  0. 1.0000     0. 
   7  -3   1      1.67    0.28  0. 1.0000     0. 
   7   3   1      1.03    0.11  0. 1.0000     0. 
   8  -3   1      2.53    0.17  0. 1.0000     0. 
   8  -3   1      2.92    0.39  0. 1.0000     0. 
   8  -3   1      2.86    0.17  0. 1.0000     0. 
   8  -3   1      2.76    0.22  0. 1.0000     0. 
   8  -3   1      2.69    0.15  0. 1.0000     0. 
   8   3   1      2.45    0.14  0. 1.0000     0. 
   9  -3   1      0.05    0.06  0. 1.0000     0. 
   9  -3   1      0.05    0.11  0. 1.0000     0. 
   9  -3   1      0.09    0.07  0. 1.0000     0. 
   9   3   1      0.02    0.06  0. 1.0000     0. 
  -9   3  -1      0.01    0.15  0. 1.0000     0. 
  10  -3   1      1.72    0.13  0. 1.0000     0. 
  10  -3   1      1.82    0.18  0. 1.0000     0. 
  10   3   1      1.85    0.12  0. 1.0000     0. 
 -10   3  -1      1.67    0.27  0. 1.0000     0. 
  10   3   1      1.80    0.12  0. 1.0000     0. 
  11  -3   1      1.12    0.10  0. 1.0000     0. 
  11   3   1      0.88    0.08  0. 1.0000     0. 
  11  -4  -1      0.18    0.06  0. 1.0000     0. 
  11   4  -1      0.18    0.04  0. 1.0000     0. 
  10  -4  -1      1.69    0.16  0. 1.0000     0. 
  10  -4  -1      1.36    0.13  0. 1.0000     0. 
 -10   4   1      1.55    0.25  0. 1.0000     0. 
  10   4  -1      1.63    0.12  0. 1.0000     0. 
   9  -4  -1      5.49    0.24  0. 1.0000     0. 
   9  -4  -1      5.62    0.24  0. 1.0000     0. 
   9  -4  -1      5.63    0.23  0. 1.0000     0. 
   9  -4  -1      5.68    0.31  0. 1.0000     0. 
   9  -4  -1      5.17    0.22  0. 1.0000     0. 
   9   4  -1      5.54    0.23  0. 1.0000     0. 
  -9   4   1      5.44    0.46  0. 1.0000     0. 
   9   4  -1      5.82    0.23  0. 1.0000     0. 
   8  -4  -1      4.38    0.43  0. 1.0000     0. 
   8  -4  -1      3.85    0.26  0. 1.0000     0. 
   8  -4  -1      4.48    0.22  0. 1.0000     0. 
   8  -4  -1      4.49    0.21  0. 1.0000     0. 
   8  -4  -1      4.34    0.22  0. 1.0000     0. 
   8   4  -1      4.16    0.19  0. 1.0000     0. 
   7  -4  -1      6.65    0.49  0. 1.0000     0. 
  -7  -4   1      7.80    0.54  0. 1.0000     0. 
  -7   4   1      7.40    0.53  0. 1.0000     0. 
   6  -4  -1     12.38    0.35  0. 1.0000     0. 
   6  -4  -1     14.06    0.59  0. 1.0000     0. 
  -6  -4   1     12.93    0.69  0. 1.0000     0. 
   6  -4  -1     12.03    0.65  0. 1.0000     0. 
  -6   4   1     13.19    0.69  0. 1.0000     0. 
   5  -4  -1      4.90    0.36  0. 1.0000     0. 
  -5   4   1      4.18    0.35  0. 1.0000     0. 
   4  -4  -1     33.86    1.27  0. 1.0000     0. 
  -4   4   1     33.65    1.30  0. 1.0000     0. 
  -3  -4   1     21.67    0.96  0. 1.0000     0. 
   3  -4  -1     20.30    0.87  0. 1.0000     0. 
   3  -4  -1     20.16    0.82  0. 1.0000     0. 
  -3   4   1     21.26    0.84  0. 1.0000     0. 
  -2  -4   1      0.03    0.11  0. 1.0000     0. 
   2  -4  -1      0.14    0.11  0. 1.0000     0. 
  -2  -4   1      0.23    0.09  0. 1.0000     0. 
  -2  -4   1      0.15    0.10  0. 1.0000     0. 
  -2   4   1      0.29    0.11  0. 1.0000     0. 
  -2   4   1      0.21    0.10  0. 1.0000     0. 
  -1  -4   1     10.39    0.52  0. 1.0000     0. 
  -1  -4   1     10.01    0.50  0. 1.0000     0. 
  -1  -4   1      9.57    0.49  0. 1.0000     0. 
   1  -4  -1     10.14    0.52  0. 1.0000     0. 
   1  -4  -1     10.24    0.48  0. 1.0000     0. 
   1  -4  -1     10.58    0.52  0. 1.0000     0. 
   1   4  -1     10.46    0.43  0. 1.0000     0. 
  -1   4   1     10.07    0.51  0. 1.0000     0. 
   1   4  -1      9.73    0.52  0. 1.0000     0. 
   1   4  -1      9.99    0.42  0. 1.0000     0. 
  -1   4   1     10.51    0.46  0. 1.0000     0. 
   0  -4   1      0.54    0.14  0. 1.0000     0. 
   0  -4   1      0.41    0.12  0. 1.0000     0. 
   0  -4  -1      0.51    0.13  0. 1.0000     0. 
   0  -4   1      0.59    0.12  0. 1.0000     0. 
   0  -4  -1      0.43    0.12  0. 1.0000     0. 
   0  -4  -1      0.35    0.09  0. 1.0000     0. 
   0   4   1      0.40    0.12  0. 1.0000     0. 
   0   4  -1      0.59    0.11  0. 1.0000     0. 
   0   4   1      0.48    0.09  0. 1.0000     0. 
   0   4  -1      0.36    0.12  0. 1.0000     0. 
  -1  -4  -1    216.68    9.12  0. 1.0000     0. 
   1  -4   1    226.27    7.74  0. 1.0000     0. 
  -1  -4  -1    228.85    8.65  0. 1.0000     0. 
   1  -4   1    224.18    9.17  0. 1.0000     0. 
   1  -4   1    220.92    8.65  0. 1.0000     0. 
  -1  -4  -1    219.41    7.72  0. 1.0000     0. 
  -1   4  -1    219.77    8.04  0. 1.0000     0. 
   1   4   1    206.21    8.64  0. 1.0000     0. 
  -1   4  -1    207.81    8.64  0. 1.0000     0. 
  -2  -4  -1    167.04    6.37  0. 1.0000     0. 
  -2  -4  -1    183.93    7.51  0. 1.0000     0. 
  -2  -4  -1    182.41    7.16  0. 1.0000     0. 
   2  -4   1    180.87    6.41  0. 1.0000     0. 
  -2  -4  -1    194.64    7.52  0. 1.0000     0. 
  -2   4  -1    175.19    6.67  0. 1.0000     0. 
  -2   4  -1    186.35    6.08  0. 1.0000     0. 
   2   4   1    171.57    7.16  0. 1.0000     0. 
  -3  -4  -1    130.46    5.37  0. 1.0000     0. 
   3  -4   1    124.82    4.60  0. 1.0000     0. 
   3  -4   1    125.92    4.32  0. 1.0000     0. 
  -3   4  -1    131.42    4.38  0. 1.0000     0. 
  -4  -4  -1     33.22    1.47  0. 1.0000     0. 
   4  -4   1     33.75    1.26  0. 1.0000     0. 
  -4   4  -1     32.38    1.27  0. 1.0000     0. 
   5  -4   1     52.34    1.90  0. 1.0000     0. 
   5   4   1     51.21    1.91  0. 1.0000     0. 
  -5   4  -1     51.30    1.92  0. 1.0000     0. 
   6  -4   1     13.21    0.68  0. 1.0000     0. 
  -6  -4  -1     12.89    0.69  0. 1.0000     0. 
   6   4   1     13.35    0.69  0. 1.0000     0. 
  -6   4  -1     14.14    0.71  0. 1.0000     0. 
   7  -4   1      1.92    0.31  0. 1.0000     0. 
   8  -4   1      7.96    0.31  0. 1.0000     0. 
   8  -4   1      9.06    0.60  0. 1.0000     0. 
   8  -4   1      8.09    0.32  0. 1.0000     0. 
   8  -4   1      7.95    0.37  0. 1.0000     0. 
   8  -4   1      8.03    0.33  0. 1.0000     0. 
   8   4   1      7.58    0.29  0. 1.0000     0. 
   9  -4   1      5.75    0.31  0. 1.0000     0. 
   9  -4   1      5.85    0.26  0. 1.0000     0. 
   9  -4   1      5.95    0.25  0. 1.0000     0. 
  -9   4  -1      6.15    0.48  0. 1.0000     0. 
   9   4   1      5.95    0.23  0. 1.0000     0. 
   9   4   1      5.80    0.23  0. 1.0000     0. 
  10  -4   1      1.25    0.12  0. 1.0000     0. 
  10  -4   1      0.99    0.14  0. 1.0000     0. 
  10   4   1      1.54    0.10  0. 1.0000     0. 
 -10   4  -1      0.73    0.21  0. 1.0000     0. 
  11  -4   1      1.13    0.10  0. 1.0000     0. 
  11   4   1      0.97    0.07  0. 1.0000     0. 
  10  -5  -1      0.54    0.12  0. 1.0000     0. 
  10  -5  -1      0.59    0.08  0. 1.0000     0. 
  10  -5  -1      0.51    0.08  0. 1.0000     0. 
  10   5  -1      0.56    0.07  0. 1.0000     0. 
   9  -5  -1      1.79    0.14  0. 1.0000     0. 
   9  -5  -1      1.53    0.17  0. 1.0000     0. 
   9  -5  -1      1.57    0.12  0. 1.0000     0. 
   9  -5  -1      1.59    0.15  0. 1.0000     0. 
   9   5  -1      1.39    0.12  0. 1.0000     0. 
  -9   5   1      1.88    0.29  0. 1.0000     0. 
   8  -5  -1     -0.29    0.16  0. 1.0000     0. 
   8  -5  -1      0.10    0.08  0. 1.0000     0. 
   8  -5  -1      0.08    0.07  0. 1.0000     0. 
   8  -5  -1     -0.02    0.10  0. 1.0000     0. 
   8   5  -1     -0.01    0.05  0. 1.0000     0. 
   7  -5  -1     19.96    0.67  0. 1.0000     0. 
   7  -5  -1     19.54    0.64  0. 1.0000     0. 
  -7  -5   1     18.09    0.99  0. 1.0000     0. 
   7  -5  -1     20.52    0.95  0. 1.0000     0. 
   7  -5  -1     20.24    0.68  0. 1.0000     0. 
  -7   5   1     19.02    0.97  0. 1.0000     0. 
   7   5  -1     19.17    0.62  0. 1.0000     0. 
   7   5  -1     19.30    0.62  0. 1.0000     0. 
   6  -5  -1      0.41    0.05  0. 1.0000     0. 
   6  -5  -1      0.46    0.19  0. 1.0000     0. 
  -6   5   1      0.50    0.19  0. 1.0000     0. 
   5  -5  -1      1.29    0.23  0. 1.0000     0. 
  -5   5   1      1.31    0.23  0. 1.0000     0. 
   4  -5  -1      3.67    0.30  0. 1.0000     0. 
  -4   5   1      3.57    0.31  0. 1.0000     0. 
   3  -5  -1     39.56    1.43  0. 1.0000     0. 
   3  -5  -1     37.88    1.53  0. 1.0000     0. 
  -3   5   1     38.85    1.45  0. 1.0000     0. 
  -2  -5   1     28.62    1.19  0. 1.0000     0. 
   2  -5  -1     28.75    1.20  0. 1.0000     0. 
  -2   5   1     30.98    1.13  0. 1.0000     0. 
  -2   5   1     29.76    1.20  0. 1.0000     0. 
  -1  -5   1      6.06    0.37  0. 1.0000     0. 
   1  -5  -1      6.68    0.39  0. 1.0000     0. 
   1  -5  -1      6.39    0.39  0. 1.0000     0. 
  -1  -5   1      6.37    0.40  0. 1.0000     0. 
  -1  -5   1      5.49    0.38  0. 1.0000     0. 
   1  -5  -1      6.56    0.40  0. 1.0000     0. 
   1   5  -1      6.42    0.30  0. 1.0000     0. 
   1   5  -1      6.53    0.30  0. 1.0000     0. 
  -1   5   1      6.68    0.34  0. 1.0000     0. 
   0  -5  -1      0.76    0.15  0. 1.0000     0. 
   0  -5  -1      0.70    0.13  0. 1.0000     0. 
   0  -5   1      1.00    0.17  0. 1.0000     0. 
   0  -5   1      0.47    0.14  0. 1.0000     0. 
   0  -5  -1      0.56    0.14  0. 1.0000     0. 
   0  -5   1      0.77    0.15  0. 1.0000     0. 
   0   5  -1      0.75    0.12  0. 1.0000     0. 
   0   5  -1      0.81    0.11  0. 1.0000     0. 
   0   5   1      0.77    0.11  0. 1.0000     0. 
   0   5   1      0.81    0.11  0. 1.0000     0. 
  -1  -5  -1      0.01    0.08  0. 1.0000     0. 
  -1  -5  -1     -0.03    0.10  0. 1.0000     0. 
   1  -5   1     -0.11    0.10  0. 1.0000     0. 
  -1  -5  -1      0.04    0.10  0. 1.0000     0. 
   1  -5   1      0.09    0.12  0. 1.0000     0. 
  -1   5  -1      0.15    0.10  0. 1.0000     0. 
  -2  -5  -1      6.79    0.41  0. 1.0000     0. 
   2  -5   1      5.38    0.39  0. 1.0000     0. 
  -2  -5  -1      5.91    0.37  0. 1.0000     0. 
  -2  -5  -1      6.66    0.35  0. 1.0000     0. 
   3  -5   1      0.47    0.15  0. 1.0000     0. 
   3  -5   1      0.38    0.15  0. 1.0000     0. 
  -3   5  -1      0.43    0.14  0. 1.0000     0. 
   4  -5   1      1.66    0.23  0. 1.0000     0. 
  -4   5  -1      1.55    0.22  0. 1.0000     0. 
   5  -5   1      2.60    0.31  0. 1.0000     0. 
  -5   5  -1      2.29    0.30  0. 1.0000     0. 
   6  -5   1      3.99    0.37  0. 1.0000     0. 
  -6   5  -1      3.93    0.39  0. 1.0000     0. 
   7  -5   1      2.23    0.17  0. 1.0000     0. 
   7  -5   1      2.42    0.17  0. 1.0000     0. 
   7  -5   1      2.29    0.16  0. 1.0000     0. 
   7  -5   1      2.32    0.35  0. 1.0000     0. 
   7   5   1      2.90    0.14  0. 1.0000     0. 
   8  -5   1     10.21    0.37  0. 1.0000     0. 
   8  -5   1      9.65    0.37  0. 1.0000     0. 
   8  -5   1      9.09    0.63  0. 1.0000     0. 
   8  -5   1      9.31    0.43  0. 1.0000     0. 
   8  -5   1      9.93    0.39  0. 1.0000     0. 
   8   5   1      9.44    0.34  0. 1.0000     0. 
   8   5   1      9.51    0.34  0. 1.0000     0. 
   9  -5   1      1.50    0.17  0. 1.0000     0. 
   9  -5   1      1.30    0.09  0. 1.0000     0. 
   9  -5   1      1.25    0.08  0. 1.0000     0. 
   9  -5   1      1.17    0.12  0. 1.0000     0. 
   9  -5   1      1.40    0.14  0. 1.0000     0. 
  -9   5  -1      1.37    0.27  0. 1.0000     0. 
   9   5   1      1.16    0.11  0. 1.0000     0. 
  10  -5   1      1.52    0.16  0. 1.0000     0. 
  10  -5   1      1.66    0.13  0. 1.0000     0. 
  10   5   1      1.52    0.10  0. 1.0000     0. 
  10  -6  -1      0.91    0.13  0. 1.0000     0. 
  10  -6  -1      0.85    0.09  0. 1.0000     0. 
  10  -6  -1      0.71    0.09  0. 1.0000     0. 
  10   6  -1      0.75    0.07  0. 1.0000     0. 
   9  -6  -1     14.84    0.59  0. 1.0000     0. 
   9  -6  -1     14.45    0.51  0. 1.0000     0. 
   9  -6  -1     15.09    0.53  0. 1.0000     0. 
   9  -6  -1     16.04    0.55  0. 1.0000     0. 
  -9   6   1     15.61    0.77  0. 1.0000     0. 
   9   6  -1     14.80    0.49  0. 1.0000     0. 
   8  -6  -1      4.81    0.28  0. 1.0000     0. 
   8  -6  -1      4.43    0.24  0. 1.0000     0. 
   8  -6  -1      4.55    0.22  0. 1.0000     0. 
   8  -6  -1      4.77    0.46  0. 1.0000     0. 
  -8   6   1      4.48    0.43  0. 1.0000     0. 
   8   6  -1      4.90    0.20  0. 1.0000     0. 
   7  -6  -1      1.77    0.18  0. 1.0000     0. 
   7  -6  -1      1.67    0.15  0. 1.0000     0. 
   7  -6  -1      1.69    0.31  0. 1.0000     0. 
   7  -6  -1      1.46    0.13  0. 1.0000     0. 
   7  -6  -1      1.80    0.15  0. 1.0000     0. 
  -7   6   1      1.11    0.30  0. 1.0000     0. 
   7   6  -1      1.34    0.12  0. 1.0000     0. 
   6  -6  -1      3.67    0.37  0. 1.0000     0. 
   6  -6  -1      3.41    0.13  0. 1.0000     0. 
  -6   6   1      3.59    0.39  0. 1.0000     0. 
   5  -6  -1      3.00    0.32  0. 1.0000     0. 
  -5   6   1      3.09    0.33  0. 1.0000     0. 
   4  -6  -1      4.51    0.35  0. 1.0000     0. 
  -4   6   1      4.73    0.36  0. 1.0000     0. 
   3  -6  -1      9.21    0.53  0. 1.0000     0. 
  -3   6   1      8.55    0.48  0. 1.0000     0. 
  -2  -6   1     -0.04    0.13  0. 1.0000     0. 
   2  -6  -1      0.07    0.12  0. 1.0000     0. 
  -2   6   1      0.07    0.11  0. 1.0000     0. 
   1  -6  -1     15.00    0.73  0. 1.0000     0. 
  -1  -6   1     15.19    0.74  0. 1.0000     0. 
  -1  -6   1     15.41    0.78  0. 1.0000     0. 
   1   6  -1     16.20    0.64  0. 1.0000     0. 
  -1   6   1     14.13    0.65  0. 1.0000     0. 
  -1   6   1     15.73    0.68  0. 1.0000     0. 
   1   6  -1     16.23    0.64  0. 1.0000     0. 
   0  -6   1     31.56    1.28  0. 1.0000     0. 
   0  -6  -1     32.51    1.27  0. 1.0000     0. 
   0  -6  -1     30.75    1.41  0. 1.0000     0. 
   0   6   1     30.00    1.21  0. 1.0000     0. 
   0   6  -1     31.79    1.23  0. 1.0000     0. 
   0   6   1     29.72    1.21  0. 1.0000     0. 
   1  -6   1     59.03    2.29  0. 1.0000     0. 
  -1  -6  -1     60.64    2.28  0. 1.0000     0. 
  -1  -6  -1     60.18    2.60  0. 1.0000     0. 
  -1   6  -1     60.05    2.31  0. 1.0000     0. 
   2  -6   1      0.33    0.16  0. 1.0000     0. 
  -2  -6  -1      0.36    0.13  0. 1.0000     0. 
  -2  -6  -1      0.41    0.16  0. 1.0000     0. 
   2   6   1      0.46    0.13  0. 1.0000     0. 
   3  -6   1      6.37    0.45  0. 1.0000     0. 
   4  -6   1     20.29    0.90  0. 1.0000     0. 
  -4   6  -1     21.25    0.91  0. 1.0000     0. 
   5  -6   1      7.73    0.49  0. 1.0000     0. 
   5  -6   1      7.14    0.23  0. 1.0000     0. 
  -5   6  -1      6.87    0.47  0. 1.0000     0. 
   6  -6   1     15.18    0.41  0. 1.0000     0. 
   6  -6   1     14.66    0.77  0. 1.0000     0. 
  -6   6  -1     14.16    0.77  0. 1.0000     0. 
   7  -6   1     23.06    0.78  0. 1.0000     0. 
   7  -6   1     23.24    0.83  0. 1.0000     0. 
   7  -6   1     24.43    1.10  0. 1.0000     0. 
   7  -6   1     22.93    0.77  0. 1.0000     0. 
   7  -6   1     22.45    0.74  0. 1.0000     0. 
   7   6   1     21.89    0.71  0. 1.0000     0. 
   8  -6   1     14.64    0.57  0. 1.0000     0. 
   8  -6   1     15.36    0.55  0. 1.0000     0. 
   8  -6   1     15.15    0.60  0. 1.0000     0. 
   8  -6   1     15.56    0.52  0. 1.0000     0. 
   8  -6   1     16.85    0.86  0. 1.0000     0. 
   8   6   1     15.07    0.50  0. 1.0000     0. 
   9  -6   1      3.08    0.18  0. 1.0000     0. 
   9  -6   1      2.75    0.18  0. 1.0000     0. 
   9  -6   1      3.45    0.24  0. 1.0000     0. 
   9  -6   1      2.88    0.14  0. 1.0000     0. 
   9  -6   1      3.44    0.15  0. 1.0000     0. 
  -9   6  -1      3.70    0.37  0. 1.0000     0. 
   9   6   1      3.06    0.15  0. 1.0000     0. 
  10  -6   1      5.99    0.23  0. 1.0000     0. 
  10  -6   1      5.72    0.28  0. 1.0000     0. 
  10   6   1      5.48    0.20  0. 1.0000     0. 
  10   6   1      4.90    0.15  0. 1.0000     0. 
  10  -7  -1      0.06    0.06  0. 1.0000     0. 
  10  -7  -1      0.06    0.09  0. 1.0000     0. 
  10  -7  -1      0.03    0.06  0. 1.0000     0. 
  10   7  -1      0.06    0.04  0. 1.0000     0. 
   9  -7  -1      1.94    0.19  0. 1.0000     0. 
   9  -7  -1      2.03    0.13  0. 1.0000     0. 
   9  -7  -1      1.59    0.16  0. 1.0000     0. 
   9  -7  -1      1.67    0.14  0. 1.0000     0. 
  -9   7   1      1.42    0.26  0. 1.0000     0. 
   9   7  -1      2.02    0.13  0. 1.0000     0. 
   8  -7  -1      5.34    0.30  0. 1.0000     0. 
   8  -7  -1      5.77    0.53  0. 1.0000     0. 
   8  -7  -1      5.46    0.26  0. 1.0000     0. 
   8  -7  -1      5.44    0.27  0. 1.0000     0. 
   8   7  -1      5.16    0.22  0. 1.0000     0. 
  -8   7   1      4.94    0.43  0. 1.0000     0. 
   7  -7  -1     12.12    0.45  0. 1.0000     0. 
   7  -7  -1     11.93    0.45  0. 1.0000     0. 
   7  -7  -1     11.72    0.71  0. 1.0000     0. 
   7  -7  -1     11.79    0.49  0. 1.0000     0. 
   7   7  -1     11.16    0.40  0. 1.0000     0. 
   6  -7  -1      9.55    0.29  0. 1.0000     0. 
   6  -7  -1      9.39    0.61  0. 1.0000     0. 
  -6   7   1      8.75    0.60  0. 1.0000     0. 
   5  -7  -1      8.64    0.28  0. 1.0000     0. 
   5  -7  -1      8.37    0.55  0. 1.0000     0. 
  -5   7   1      9.68    0.57  0. 1.0000     0. 
   4  -7  -1     14.40    0.72  0. 1.0000     0. 
  -4   7   1     14.34    0.71  0. 1.0000     0. 
   3  -7  -1     10.89    0.64  0. 1.0000     0. 
  -2  -7   1      3.58    0.37  0. 1.0000     0. 
   2  -7  -1      3.83    0.37  0. 1.0000     0. 
  -2   7   1      4.95    0.31  0. 1.0000     0. 
  -1  -7   1     -0.21    0.13  0. 1.0000     0. 
   1  -7  -1      0.06    0.13  0. 1.0000     0. 
   1   7  -1      0.16    0.08  0. 1.0000     0. 
  -1   7   1      0.11    0.10  0. 1.0000     0. 
   1   7  -1      0.18    0.07  0. 1.0000     0. 
  -1   7   1      0.25    0.12  0. 1.0000     0. 
   0  -7   1     82.66    3.07  0. 1.0000     0. 
   0  -7  -1     83.42    3.06  0. 1.0000     0. 
   0   7  -1     80.21    3.06  0. 1.0000     0. 
   0   7   1     77.42    2.92  0. 1.0000     0. 
   0   7   1     83.02    3.05  0. 1.0000     0. 
  -1  -7  -1     10.76    0.59  0. 1.0000     0. 
  -1  -7  -1     10.61    0.60  0. 1.0000     0. 
   1  -7   1     10.60    0.61  0. 1.0000     0. 
   1   7   1     10.66    0.50  0. 1.0000     0. 
  -1   7  -1     10.12    0.52  0. 1.0000     0. 
  -2  -7  -1     16.12    0.80  0. 1.0000     0. 
   2  -7   1     15.50    0.79  0. 1.0000     0. 
  -2  -7  -1     14.37    0.76  0. 1.0000     0. 
   3  -7   1      8.46    0.56  0. 1.0000     0. 
   4  -7   1      0.88    0.22  0. 1.0000     0. 
   5  -7   1      5.88    0.46  0. 1.0000     0. 
   5  -7   1      5.68    0.20  0. 1.0000     0. 
   6  -7   1      0.13    0.19  0. 1.0000     0. 
   6  -7   1      0.13    0.09  0. 1.0000     0. 
   6  -7   1      0.06    0.04  0. 1.0000     0. 
   7  -7   1      0.81    0.26  0. 1.0000     0. 
   7  -7   1      0.69    0.12  0. 1.0000     0. 
   7  -7   1      0.43    0.09  0. 1.0000     0. 
   7  -7   1      0.50    0.13  0. 1.0000     0. 
   7   7   1      1.04    0.09  0. 1.0000     0. 
   8  -7   1      4.18    0.21  0. 1.0000     0. 
   8  -7   1      4.44    0.48  0. 1.0000     0. 
   8  -7   1      4.34    0.23  0. 1.0000     0. 
   8  -7   1      4.21    0.27  0. 1.0000     0. 
   8   7   1      4.08    0.18  0. 1.0000     0. 
   9  -7   1      0.13    0.05  0. 1.0000     0. 
   9  -7   1      0.05    0.07  0. 1.0000     0. 
   9  -7   1      0.16    0.11  0. 1.0000     0. 
   9  -7   1      0.05    0.07  0. 1.0000     0. 
  -9   7  -1     -0.05    0.15  0. 1.0000     0. 
   9   7   1      0.04    0.05  0. 1.0000     0. 
  10  -7   1      9.67    0.33  0. 1.0000     0. 
  10  -7   1      8.80    0.32  0. 1.0000     0. 
  10  -7   1      9.43    0.38  0. 1.0000     0. 
  10   7   1      9.33    0.30  0. 1.0000     0. 
  10  -8  -1      2.66    0.17  0. 1.0000     0. 
  10  -8  -1      2.29    0.13  0. 1.0000     0. 
  10   8  -1      2.30    0.10  0. 1.0000     0. 
   9  -8  -1      3.52    0.17  0. 1.0000     0. 
   9  -8  -1      3.25    0.23  0. 1.0000     0. 
   9  -8  -1      3.30    0.20  0. 1.0000     0. 
   9   8  -1      3.37    0.16  0. 1.0000     0. 
   8  -8  -1      9.17    0.40  0. 1.0000     0. 
   8  -8  -1      9.02    0.36  0. 1.0000     0. 
  -8   8   1      8.24    0.54  0. 1.0000     0. 
   8   8  -1      8.33    0.31  0. 1.0000     0. 
   7  -8  -1     25.87    0.87  0. 1.0000     0. 
   7  -8  -1     26.09    0.87  0. 1.0000     0. 
   7  -8  -1     24.69    1.18  0. 1.0000     0. 
   7  -8  -1     25.85    0.92  0. 1.0000     0. 
   7   8  -1     24.93    0.80  0. 1.0000     0. 
   6  -8  -1      0.12    0.06  0. 1.0000     0. 
   6  -8  -1      0.14    0.11  0. 1.0000     0. 
   6  -8  -1      0.24    0.20  0. 1.0000     0. 
   6  -8  -1      0.29    0.10  0. 1.0000     0. 
   6   8  -1      0.39    0.07  0. 1.0000     0. 
   5  -8  -1      0.84    0.25  0. 1.0000     0. 
   4  -8  -1      1.21    0.25  0. 1.0000     0. 
   3  -8  -1      3.61    0.41  0. 1.0000     0. 
  -3   8   1      3.62    0.31  0. 1.0000     0. 
  -2  -8   1      5.28    0.45  0. 1.0000     0. 
   2  -8  -1      5.62    0.47  0. 1.0000     0. 
  -2   8   1      5.26    0.35  0. 1.0000     0. 
  -1  -8   1     10.71    0.65  0. 1.0000     0. 
   1  -8  -1     10.41    0.63  0. 1.0000     0. 
  -1   8   1      8.73    0.49  0. 1.0000     0. 
  -1   8   1     11.03    0.52  0. 1.0000     0. 
   0  -8  -1      0.08    0.16  0. 1.0000     0. 
   0  -8   1      0.09    0.16  0. 1.0000     0. 
   0   8   1      0.13    0.08  0. 1.0000     0. 
   0   8  -1      0.16    0.10  0. 1.0000     0. 
   1  -8   1     13.07    0.75  0. 1.0000     0. 
  -1  -8  -1     12.66    0.73  0. 1.0000     0. 
  -1   8  -1     14.18    0.65  0. 1.0000     0. 
  -2  -8  -1      0.60    0.20  0. 1.0000     0. 
   2  -8   1      0.59    0.21  0. 1.0000     0. 
   3  -8   1      7.36    0.56  0. 1.0000     0. 
   4  -8   1     11.50    0.65  0. 1.0000     0. 
   5  -8   1      8.21    0.26  0. 1.0000     0. 
   5  -8   1      7.32    0.53  0. 1.0000     0. 
   6  -8   1      0.04    0.19  0. 1.0000     0. 
   6  -8   1      0.06    0.10  0. 1.0000     0. 
   6  -8   1      0.20    0.05  0. 1.0000     0. 
   6  -8   1      0.16    0.09  0. 1.0000     0. 
   6   8   1      0.14    0.06  0. 1.0000     0. 
   7  -8   1      0.47    0.24  0. 1.0000     0. 
   7  -8   1      0.38    0.12  0. 1.0000     0. 
   7  -8   1      0.29    0.10  0. 1.0000     0. 
   8  -8   1      0.06    0.09  0. 1.0000     0. 
   8  -8   1      0.20    0.11  0. 1.0000     0. 
   8   8   1      0.05    0.06  0. 1.0000     0. 
   9  -8   1     14.12    0.55  0. 1.0000     0. 
   9  -8   1     14.11    0.50  0. 1.0000     0. 
   9  -8   1     14.47    0.51  0. 1.0000     0. 
   9   8   1     14.62    0.46  0. 1.0000     0. 
  -9   8  -1     13.27    0.70  0. 1.0000     0. 
   9   8   1     14.17    0.36  0. 1.0000     0. 
  10  -8   1      4.38    0.23  0. 1.0000     0. 
  10  -9  -1      2.25    0.15  0. 1.0000     0. 
   9  -9  -1      6.43    0.26  0. 1.0000     0. 
   9  -9  -1      6.83    0.28  0. 1.0000     0. 
   9  -9  -1      7.00    0.31  0. 1.0000     0. 
   9   9  -1      6.55    0.23  0. 1.0000     0. 
   8  -9  -1      0.24    0.11  0. 1.0000     0. 
   8  -9  -1      0.15    0.09  0. 1.0000     0. 
   8   9  -1      0.32    0.07  0. 1.0000     0. 
   7  -9  -1      1.56    0.15  0. 1.0000     0. 
   7  -9  -1      1.63    0.16  0. 1.0000     0. 
   7  -9  -1      1.55    0.18  0. 1.0000     0. 
   7  -9  -1      2.13    0.36  0. 1.0000     0. 
   7   9  -1      1.33    0.12  0. 1.0000     0. 
   6  -9  -1      1.91    0.35  0. 1.0000     0. 
   6  -9  -1      1.98    0.12  0. 1.0000     0. 
   6  -9  -1      2.16    0.21  0. 1.0000     0. 
   6  -9  -1      2.09    0.18  0. 1.0000     0. 
   6   9  -1      2.11    0.14  0. 1.0000     0. 
   5  -9  -1     29.67    1.27  0. 1.0000     0. 
   5  -9  -1     27.11    0.95  0. 1.0000     0. 
   5   9  -1     29.35    0.89  0. 1.0000     0. 
   4  -9  -1      5.21    0.46  0. 1.0000     0. 
   4   9  -1      6.62    0.24  0. 1.0000     0. 
  -4   9   1      5.92    0.46  0. 1.0000     0. 
   4   9  -1      7.08    0.24  0. 1.0000     0. 
   3  -9  -1      5.61    0.53  0. 1.0000     0. 
  -3   9   1      5.43    0.40  0. 1.0000     0. 
   2  -9  -1      5.99    0.54  0. 1.0000     0. 
  -2  -9   1      6.31    0.54  0. 1.0000     0. 
  -2   9   1      7.39    0.43  0. 1.0000     0. 
  -2   9   1      7.20    0.44  0. 1.0000     0. 
   1  -9  -1      9.67    0.66  0. 1.0000     0. 
  -1  -9   1      9.38    0.66  0. 1.0000     0. 
  -1   9   1     11.33    0.53  0. 1.0000     0. 
   0  -9  -1      5.32    0.48  0. 1.0000     0. 
   0  -9   1      5.82    0.51  0. 1.0000     0. 
   0   9  -1      5.91    0.33  0. 1.0000     0. 
   0   9   1      5.55    0.29  0. 1.0000     0. 
  -1  -9  -1      3.42    0.41  0. 1.0000     0. 
   1  -9   1      2.51    0.36  0. 1.0000     0. 
  -1   9  -1      3.99    0.29  0. 1.0000     0. 
   2  -9   1      0.12    0.21  0. 1.0000     0. 
  -2  -9  -1     -0.16    0.17  0. 1.0000     0. 
   3  -9   1      1.75    0.34  0. 1.0000     0. 
   4  -9   1      6.48    0.49  0. 1.0000     0. 
   5  -9   1      6.13    0.22  0. 1.0000     0. 
   5  -9   1      6.33    0.29  0. 1.0000     0. 
   5  -9   1      5.40    0.50  0. 1.0000     0. 
   5   9   1      6.07    0.24  0. 1.0000     0. 
   6  -9   1     18.17    0.51  0. 1.0000     0. 
   6  -9   1     17.26    0.92  0. 1.0000     0. 
   6  -9   1     18.12    0.67  0. 1.0000     0. 
   6  -9   1     17.71    0.63  0. 1.0000     0. 
   6   9   1     17.19    0.57  0. 1.0000     0. 
   7  -9   1      8.51    0.35  0. 1.0000     0. 
   7  -9   1      7.55    0.60  0. 1.0000     0. 
   7  -9   1      8.37    0.37  0. 1.0000     0. 
   7   9   1      7.59    0.29  0. 1.0000     0. 
   8  -9   1      2.30    0.18  0. 1.0000     0. 
   8  -9   1      2.48    0.21  0. 1.0000     0. 
   8   9   1      2.19    0.13  0. 1.0000     0. 
   9  -9   1      1.32    0.13  0. 1.0000     0. 
   9  -9   1      1.25    0.09  0. 1.0000     0. 
   9  -9   1      1.33    0.15  0. 1.0000     0. 
   9  -9   1      1.41    0.09  0. 1.0000     0. 
   9   9   1      1.33    0.09  0. 1.0000     0. 
   9   9   1      1.30    0.06  0. 1.0000     0. 
  10  -9   1      1.76    0.15  0. 1.0000     0. 
   9 -10  -1      7.19    0.28  0. 1.0000     0. 
   9 -10  -1      7.20    0.31  0. 1.0000     0. 
   9  10  -1      6.72    0.23  0. 1.0000     0. 
   8 -10  -1      1.89    0.19  0. 1.0000     0. 
   8 -10  -1      2.10    0.17  0. 1.0000     0. 
   8  10  -1      1.74    0.11  0. 1.0000     0. 
   7 -10  -1     10.94    0.42  0. 1.0000     0. 
   7 -10  -1     11.16    0.45  0. 1.0000     0. 
   7 -10  -1     10.16    0.42  0. 1.0000     0. 
   7  10  -1      9.96    0.36  0. 1.0000     0. 
   6 -10  -1     15.03    0.58  0. 1.0000     0. 
   6 -10  -1     15.49    0.56  0. 1.0000     0. 
   6 -10  -1     14.64    0.83  0. 1.0000     0. 
   6 -10  -1     14.70    0.44  0. 1.0000     0. 
  -6  10   1     15.24    0.83  0. 1.0000     0. 
   6  10  -1     15.07    0.50  0. 1.0000     0. 
   5 -10  -1     11.59    0.46  0. 1.0000     0. 
   5 -10  -1     10.94    0.44  0. 1.0000     0. 
   5 -10  -1     10.77    0.70  0. 1.0000     0. 
  -5  10   1     10.66    0.66  0. 1.0000     0. 
   5  10  -1     11.34    0.39  0. 1.0000     0. 
   4 -10  -1     35.02    1.47  0. 1.0000     0. 
   4  10  -1     34.24    1.06  0. 1.0000     0. 
   3  10  -1      0.21    0.05  0. 1.0000     0. 
  -2 -10   1      7.49    0.66  0. 1.0000     0. 
  -2  10   1      8.45    0.53  0. 1.0000     0. 
  -2  10   1      7.87    0.25  0. 1.0000     0. 
  -1 -10   1      0.08    0.21  0. 1.0000     0. 
  -1  10   1      0.14    0.10  0. 1.0000     0. 
   0 -10   1      2.05    0.36  0. 1.0000     0. 
   0 -10  -1      2.16    0.37  0. 1.0000     0. 
   0  10  -1      3.52    0.11  0. 1.0000     0. 
   0  10  -1      3.51    0.23  0. 1.0000     0. 
  -1 -10  -1     19.65    1.11  0. 1.0000     0. 
  -1  10  -1     21.49    0.60  0. 1.0000     0. 
  -1  10  -1     22.96    0.96  0. 1.0000     0. 
  -2 -10  -1      1.82    0.37  0. 1.0000     0. 
   2  10   1      2.63    0.15  0. 1.0000     0. 
  -2  10  -1      2.77    0.12  0. 1.0000     0. 
   3  10   1      0.48    0.05  0. 1.0000     0. 
   3  10   1      0.52    0.05  0. 1.0000     0. 
   4 -10   1      5.56    0.46  0. 1.0000     0. 
   4  10   1      3.48    0.17  0. 1.0000     0. 
   5 -10   1     12.12    0.38  0. 1.0000     0. 
   5 -10   1     12.44    0.47  0. 1.0000     0. 
   5 -10   1     12.62    0.75  0. 1.0000     0. 
   5  10   1     12.33    0.42  0. 1.0000     0. 
   6 -10   1      0.97    0.13  0. 1.0000     0. 
   6 -10   1      1.05    0.09  0. 1.0000     0. 
   6 -10   1      1.28    0.15  0. 1.0000     0. 
   6 -10   1      0.75    0.26  0. 1.0000     0. 
   6  10   1      0.88    0.09  0. 1.0000     0. 
   7 -10   1      3.97    0.23  0. 1.0000     0. 
   7 -10   1      3.61    0.25  0. 1.0000     0. 
   7  10   1      3.96    0.17  0. 1.0000     0. 
   8 -10   1      0.05    0.10  0. 1.0000     0. 
   8 -10   1      0.18    0.08  0. 1.0000     0. 
   8  10   1      0.09    0.05  0. 1.0000     0. 
   8  10   1      0.04    0.03  0. 1.0000     0. 
   9 -10   1      0.47    0.08  0. 1.0000     0. 
   9 -10   1      0.45    0.11  0. 1.0000     0. 
   9 -11  -1     -0.03    0.06  0. 1.0000     0. 
   9 -11  -1      0.10    0.08  0. 1.0000     0. 
   8 -11  -1      0.15    0.10  0. 1.0000     0. 
   8 -11  -1      0.24    0.08  0. 1.0000     0. 
   8  11  -1      0.25    0.05  0. 1.0000     0. 
   7 -11  -1      5.20    0.26  0. 1.0000     0. 
   7 -11  -1      5.55    0.26  0. 1.0000     0. 
   7 -11  -1      5.25    0.28  0. 1.0000     0. 
   7  11  -1      5.23    0.21  0. 1.0000     0. 
   6 -11  -1     13.47    0.50  0. 1.0000     0. 
   6 -11  -1     13.41    0.52  0. 1.0000     0. 
   6 -11  -1     12.91    0.39  0. 1.0000     0. 
   6  11  -1     12.70    0.44  0. 1.0000     0. 
   5 -11  -1     60.64    2.36  0. 1.0000     0. 
   5 -11  -1     59.20    2.01  0. 1.0000     0. 
   5  11  -1     62.22    1.82  0. 1.0000     0. 
   4 -11  -1      5.12    0.50  0. 1.0000     0. 
   4  11  -1      5.37    0.23  0. 1.0000     0. 
  -4  11   1      5.88    0.21  0. 1.0000     0. 
  -4  11   1      6.08    0.28  0. 1.0000     0. 
   3  11  -1     40.37    1.22  0. 1.0000     0. 
  -3  11   1     40.39    1.09  0. 1.0000     0. 
  -3  11   1     39.57    1.30  0. 1.0000     0. 
   3  11  -1     41.52    1.36  0. 1.0000     0. 
   3  11  -1     39.55    1.35  0. 1.0000     0. 
   3  11  -1     38.95    1.27  0. 1.0000     0. 
   2  11  -1      0.19    0.06  0. 1.0000     0. 
  -2  11   1      0.29    0.05  0. 1.0000     0. 
  -1  11   1    125.41    3.31  0. 1.0000     0. 
   1  11   1     15.15    0.58  0. 1.0000     0. 
  -1  11  -1     17.16    0.45  0. 1.0000     0. 
  -2  11  -1      2.34    0.11  0. 1.0000     0. 
   2  11   1      2.46    0.13  0. 1.0000     0. 
  -3  11  -1      7.46    0.32  0. 1.0000     0. 
  -3  11  -1      7.25    0.24  0. 1.0000     0. 
   3  11   1      7.06    0.27  0. 1.0000     0. 
   4 -11   1     10.63    0.69  0. 1.0000     0. 
  -4  11  -1     10.81    0.42  0. 1.0000     0. 
   4  11   1     10.31    0.36  0. 1.0000     0. 
   5 -11   1      6.95    0.32  0. 1.0000     0. 
   5 -11   1      6.58    0.24  0. 1.0000     0. 
   5 -11   1      7.00    0.32  0. 1.0000     0. 
   5 -11   1      6.37    0.55  0. 1.0000     0. 
   5  11   1      6.09    0.25  0. 1.0000     0. 
   6 -11   1     41.49    1.13  0. 1.0000     0. 
   6 -11   1     42.11    1.42  0. 1.0000     0. 
   6 -11   1     43.10    1.37  0. 1.0000     0. 
   6  11   1     41.18    1.27  0. 1.0000     0. 
   7 -11   1      0.84    0.14  0. 1.0000     0. 
   7 -11   1      0.84    0.12  0. 1.0000     0. 
   7 -11   1      0.72    0.11  0. 1.0000     0. 
   7  11   1      1.20    0.09  0. 1.0000     0. 
   8 -11   1      2.19    0.16  0. 1.0000     0. 
   8 -11   1      2.21    0.18  0. 1.0000     0. 
   8  11   1      1.95    0.10  0. 1.0000     0. 
   8  11   1      1.84    0.07  0. 1.0000     0. 
   8  11   1      1.82    0.07  0. 1.0000     0. 
   9 -11   1      0.34    0.09  0. 1.0000     0. 
   9 -11   1      0.18    0.06  0. 1.0000     0. 
   8 -12  -1      2.03    0.16  0. 1.0000     0. 
   8 -12  -1      1.87    0.14  0. 1.0000     0. 
   8  12  -1      1.83    0.09  0. 1.0000     0. 
   7 -12  -1     19.27    0.67  0. 1.0000     0. 
   7 -12  -1     18.55    0.70  0. 1.0000     0. 
   7 -12  -1     19.50    0.68  0. 1.0000     0. 
  -7  12   1     20.20    0.55  0. 1.0000     0. 
   7  12  -1     20.99    0.62  0. 1.0000     0. 
   6 -12  -1     15.39    0.57  0. 1.0000     0. 
   6 -12  -1     16.04    0.59  0. 1.0000     0. 
   6 -12  -1     15.85    0.44  0. 1.0000     0. 
  -6  12   1     15.49    0.45  0. 1.0000     0. 
   6  12  -1     15.19    0.50  0. 1.0000     0. 
   5 -12  -1     24.82    0.73  0. 1.0000     0. 
   5 -12  -1     25.90    0.90  0. 1.0000     0. 
   5  12  -1     26.24    0.80  0. 1.0000     0. 
  -5  12   1     24.91    0.71  0. 1.0000     0. 
  -5  12   1     26.00    0.87  0. 1.0000     0. 
   4 -12  -1     10.70    0.68  0. 1.0000     0. 
   4  12  -1     10.35    0.37  0. 1.0000     0. 
  -4  12   1     10.49    0.42  0. 1.0000     0. 
  -4  12   1     10.67    0.32  0. 1.0000     0. 
   3 -12  -1      0.34    0.22  0. 1.0000     0. 
   3  12  -1      0.13    0.06  0. 1.0000     0. 
  -3  12   1      0.20    0.09  0. 1.0000     0. 
  -3  12   1      0.12    0.05  0. 1.0000     0. 
   3  12  -1      0.13    0.06  0. 1.0000     0. 
  -2  12   1      0.38    0.04  0. 1.0000     0. 
  -2  12   1      0.42    0.10  0. 1.0000     0. 
   2  12  -1      0.37    0.08  0. 1.0000     0. 
   2  12  -1      0.46    0.08  0. 1.0000     0. 
   2  12  -1      0.46    0.07  0. 1.0000     0. 
  -1  12   1      5.06    0.23  0. 1.0000     0. 
   1  12  -1      5.56    0.23  0. 1.0000     0. 
   1  12  -1      5.21    0.24  0. 1.0000     0. 
  -1  12   1      5.56    0.26  0. 1.0000     0. 
   0  12   1     48.11    1.53  0. 1.0000     0. 
   0  12   1     47.42    1.46  0. 1.0000     0. 
   0  12  -1     48.42    1.53  0. 1.0000     0. 
   1  12   1      1.79    0.13  0. 1.0000     0. 
   1  12   1      1.66    0.13  0. 1.0000     0. 
   1  12   1      2.07    0.14  0. 1.0000     0. 
  -1  12  -1      2.32    0.16  0. 1.0000     0. 
  -1  12  -1      1.86    0.14  0. 1.0000     0. 
   2  12   1      9.67    0.34  0. 1.0000     0. 
   2  12   1      9.13    0.33  0. 1.0000     0. 
  -2  12  -1      8.98    0.37  0. 1.0000     0. 
  -2  12  -1      9.04    0.27  0. 1.0000     0. 
   2  12   1      8.58    0.34  0. 1.0000     0. 
   3 -12   1     23.66    1.13  0. 1.0000     0. 
  -3  12  -1     23.99    0.66  0. 1.0000     0. 
   3  12   1     23.68    0.75  0. 1.0000     0. 
  -3  12  -1     23.32    0.81  0. 1.0000     0. 
   4 -12   1     10.97    0.70  0. 1.0000     0. 
  -4  12  -1     10.67    0.42  0. 1.0000     0. 
   4  12   1     10.02    0.36  0. 1.0000     0. 
  -4  12  -1     10.15    0.32  0. 1.0000     0. 
   5 -12   1      2.31    0.20  0. 1.0000     0. 
   5 -12   1      2.53    0.20  0. 1.0000     0. 
   5 -12   1      2.16    0.13  0. 1.0000     0. 
   5  12   1      2.13    0.13  0. 1.0000     0. 
  -5  12  -1      2.16    0.12  0. 1.0000     0. 
   6 -12   1      1.20    0.07  0. 1.0000     0. 
   6 -12   1      0.96    0.13  0. 1.0000     0. 
   6 -12   1      1.06    0.14  0. 1.0000     0. 
   6  12   1      0.84    0.08  0. 1.0000     0. 
   7 -12   1      2.96    0.19  0. 1.0000     0. 
   7 -12   1      3.06    0.19  0. 1.0000     0. 
   7 -12   1      2.69    0.20  0. 1.0000     0. 
  -7  12  -1      2.96    0.13  0. 1.0000     0. 
   7  12   1      3.09    0.13  0. 1.0000     0. 
   8 -12   1      5.97    0.24  0. 1.0000     0. 
   8 -12   1      6.05    0.26  0. 1.0000     0. 
   8  12   1      5.53    0.19  0. 1.0000     0. 
   7 -13  -1      1.67    0.16  0. 1.0000     0. 
   7 -13  -1      1.95    0.15  0. 1.0000     0. 
   7  13  -1      1.69    0.10  0. 1.0000     0. 
   6 -13  -1      1.90    0.17  0. 1.0000     0. 
   6 -13  -1      1.92    0.18  0. 1.0000     0. 
   6 -13  -1      2.16    0.17  0. 1.0000     0. 
   6 -13  -1      2.15    0.09  0. 1.0000     0. 
  -6  13   1      2.28    0.09  0. 1.0000     0. 
   6  13  -1      2.10    0.12  0. 1.0000     0. 
   5 -13  -1     55.07    1.50  0. 1.0000     0. 
  -5  13   1     55.05    1.75  0. 1.0000     0. 
   5  13  -1     54.17    1.65  0. 1.0000     0. 
  -5  13   1     56.32    1.47  0. 1.0000     0. 
  -4  13   1      4.01    0.14  0. 1.0000     0. 
   4  13  -1      3.97    0.18  0. 1.0000     0. 
  -4  13   1      3.98    0.23  0. 1.0000     0. 
   3 -13  -1    126.01    4.41  0. 1.0000     0. 
   3  13  -1    119.01    3.80  0. 1.0000     0. 
   3  13  -1    127.77    3.65  0. 1.0000     0. 
  -3  13   1    122.33    3.83  0. 1.0000     0. 
   2  13  -1      0.30    0.07  0. 1.0000     0. 
   2  13  -1      0.29    0.06  0. 1.0000     0. 
   2  13  -1      0.33    0.07  0. 1.0000     0. 
  -2  13   1      0.29    0.09  0. 1.0000     0. 
  -1  13   1     11.65    0.44  0. 1.0000     0. 
   1  13  -1     11.72    0.40  0. 1.0000     0. 
   1  13  -1     11.10    0.42  0. 1.0000     0. 
  -1  13   1     10.97    0.40  0. 1.0000     0. 
   1  13  -1     11.69    0.44  0. 1.0000     0. 
   0  13  -1      1.31    0.13  0. 1.0000     0. 
   0  13  -1      1.22    0.11  0. 1.0000     0. 
   0  13   1      1.09    0.12  0. 1.0000     0. 
   0  13   1      1.10    0.11  0. 1.0000     0. 
  -1  13  -1     50.80    1.59  0. 1.0000     0. 
   1  13   1     52.46    1.65  0. 1.0000     0. 
   1  13   1     52.05    1.78  0. 1.0000     0. 
   1  13   1     51.64    1.58  0. 1.0000     0. 
  -1  13  -1     54.72    1.67  0. 1.0000     0. 
   2  13   1      4.75    0.21  0. 1.0000     0. 
  -2  13  -1      4.56    0.24  0. 1.0000     0. 
   2  13   1      4.42    0.21  0. 1.0000     0. 
   3 -13   1     18.85    0.97  0. 1.0000     0. 
   3  13   1     18.85    0.62  0. 1.0000     0. 
  -3  13  -1     19.64    0.68  0. 1.0000     0. 
  -3  13  -1     19.16    0.53  0. 1.0000     0. 
  -4  13  -1     47.39    1.32  0. 1.0000     0. 
  -4  13  -1     50.72    1.58  0. 1.0000     0. 
   4  13   1     49.20    1.48  0. 1.0000     0. 
   5 -13   1     11.53    0.46  0. 1.0000     0. 
   5 -13   1     11.86    0.35  0. 1.0000     0. 
  -5  13  -1     11.78    0.34  0. 1.0000     0. 
   5  13   1     11.19    0.39  0. 1.0000     0. 
  -5  13  -1     11.38    0.44  0. 1.0000     0. 
   6 -13   1     24.17    0.83  0. 1.0000     0. 
   6 -13   1     23.70    0.86  0. 1.0000     0. 
   6  13   1     25.61    0.77  0. 1.0000     0. 
  -6  13  -1     25.86    0.68  0. 1.0000     0. 
   7 -13   1      7.90    0.32  0. 1.0000     0. 
   7 -13   1      7.75    0.31  0. 1.0000     0. 
   7 -13   1      7.94    0.31  0. 1.0000     0. 
   7  13   1      7.42    0.26  0. 1.0000     0. 
   6 -14  -1      5.19    0.24  0. 1.0000     0. 
   6 -14  -1      4.96    0.24  0. 1.0000     0. 
  -6  14   1      5.60    0.24  0. 1.0000     0. 
   6  14  -1      5.73    0.20  0. 1.0000     0. 
   5 -14  -1      9.24    0.28  0. 1.0000     0. 
  -5  14   1      8.39    0.35  0. 1.0000     0. 
   5  14  -1      9.20    0.31  0. 1.0000     0. 
   4  14  -1      0.19    0.06  0. 1.0000     0. 
  -4  14   1      0.17    0.09  0. 1.0000     0. 
  -3  14   1      1.20    0.13  0. 1.0000     0. 
   3  14  -1      1.22    0.11  0. 1.0000     0. 
   2  14  -1     15.04    0.49  0. 1.0000     0. 
  -2  14   1     15.07    0.54  0. 1.0000     0. 
   2  14  -1     14.13    0.50  0. 1.0000     0. 
  -1  14   1      0.25    0.08  0. 1.0000     0. 
   1  14  -1      0.12    0.06  0. 1.0000     0. 
  -1  14   1      0.28    0.07  0. 1.0000     0. 
   1  14  -1      0.21    0.07  0. 1.0000     0. 
   1  14  -1      0.24    0.06  0. 1.0000     0. 
   0  14   1     17.09    0.59  0. 1.0000     0. 
   0  14   1     16.80    0.57  0. 1.0000     0. 
   0  14   1     16.89    0.62  0. 1.0000     0. 
   0  14  -1     16.93    0.60  0. 1.0000     0. 
   0  14  -1     17.88    0.57  0. 1.0000     0. 
   0  14  -1     17.23    0.63  0. 1.0000     0. 
   1  14   1      7.56    0.28  0. 1.0000     0. 
  -1  14  -1      7.11    0.31  0. 1.0000     0. 
   1  14   1      7.31    0.28  0. 1.0000     0. 
   1  14   1      7.17    0.28  0. 1.0000     0. 
   1  14   1      7.32    0.29  0. 1.0000     0. 
   2  14   1     36.62    1.22  0. 1.0000     0. 
  -2  14  -1     40.39    1.26  0. 1.0000     0. 
   2  14   1     39.27    1.19  0. 1.0000     0. 
  -3  14  -1     27.36    0.91  0. 1.0000     0. 
   3  14   1     26.88    0.84  0. 1.0000     0. 
  -4  14  -1      5.08    0.25  0. 1.0000     0. 
   4  14   1      4.75    0.20  0. 1.0000     0. 
   5 -14   1      3.29    0.13  0. 1.0000     0. 
   5  14   1      3.16    0.15  0. 1.0000     0. 
  -5  14  -1      3.17    0.19  0. 1.0000     0. 
   6 -14   1      0.92    0.11  0. 1.0000     0. 
   6 -14   1      0.95    0.11  0. 1.0000     0. 
   6  14   1      1.04    0.08  0. 1.0000     0. 
   6  15  -1      0.14    0.04  0. 1.0000     0. 
  -5  15   1      9.58    0.35  0. 1.0000     0. 
   5  15  -1      9.08    0.31  0. 1.0000     0. 
   4  15  -1      0.59    0.07  0. 1.0000     0. 
  -4  15   1      0.69    0.10  0. 1.0000     0. 
  -3  15   1     18.86    0.65  0. 1.0000     0. 
   3  15  -1     19.07    0.61  0. 1.0000     0. 
   2  15  -1      8.33    0.30  0. 1.0000     0. 
   2  15  -1      7.96    0.30  0. 1.0000     0. 
  -2  15   1      8.55    0.33  0. 1.0000     0. 
   1  15  -1     59.31    2.10  0. 1.0000     0. 
   1  15  -1     63.80    1.89  0. 1.0000     0. 
  -1  15   1     66.10    2.14  0. 1.0000     0. 
  -1  15   1     62.05    1.89  0. 1.0000     0. 
   1  15  -1     66.72    2.11  0. 1.0000     0. 
   1  15  -1     62.08    1.97  0. 1.0000     0. 
  -1  15   1     61.62    1.98  0. 1.0000     0. 
   0  15   1      2.83    0.14  0. 1.0000     0. 
   0  15  -1      2.81    0.16  0. 1.0000     0. 
   0  15   1      2.75    0.16  0. 1.0000     0. 
   0  15  -1      2.94    0.15  0. 1.0000     0. 
   0  15  -1      2.67    0.17  0. 1.0000     0. 
   0  15   1      2.88    0.17  0. 1.0000     0. 
   1  15   1      0.90    0.09  0. 1.0000     0. 
   1  15   1      1.01    0.10  0. 1.0000     0. 
  -1  15  -1      0.73    0.10  0. 1.0000     0. 
  -2  15  -1      3.54    0.20  0. 1.0000     0. 
   2  15   1      3.90    0.18  0. 1.0000     0. 
   3  15   1      5.96    0.23  0. 1.0000     0. 
  -3  15  -1      5.49    0.26  0. 1.0000     0. 
  -4  15  -1     15.06    0.52  0. 1.0000     0. 
   4  15   1     14.30    0.47  0. 1.0000     0. 
  -5  15  -1      1.06    0.10  0. 1.0000     0. 
   5  15   1      0.82    0.07  0. 1.0000     0. 
   6  15   1      1.06    0.07  0. 1.0000     0. 
   5  16  -1      3.84    0.15  0. 1.0000     0. 
  -4  16   1     13.28    0.46  0. 1.0000     0. 
   4  16  -1     13.54    0.43  0. 1.0000     0. 
  -3  16   1      0.16    0.07  0. 1.0000     0. 
   3  16  -1      0.25    0.06  0. 1.0000     0. 
  -2  16   1      2.50    0.15  0. 1.0000     0. 
  -2  16   1      2.13    0.13  0. 1.0000     0. 
   2  16  -1      2.44    0.13  0. 1.0000     0. 
  -1  16   1      2.86    0.13  0. 1.0000     0. 
   1  16  -1      2.55    0.14  0. 1.0000     0. 
   1  16  -1      2.72    0.14  0. 1.0000     0. 
  -1  16   1      2.78    0.16  0. 1.0000     0. 
   0  16  -1      1.26    0.11  0. 1.0000     0. 
   0  16   1      1.16    0.11  0. 1.0000     0. 
   0  16  -1      1.28    0.12  0. 1.0000     0. 
   0  16   1      1.13    0.11  0. 1.0000     0. 
  -1  16  -1      4.97    0.22  0. 1.0000     0. 
  -1  16  -1      5.06    0.21  0. 1.0000     0. 
   1  16   1      4.63    0.20  0. 1.0000     0. 
  -2  16  -1     11.43    0.41  0. 1.0000     0. 
   2  16   1     11.81    0.38  0. 1.0000     0. 
  -2  16  -1     10.64    0.42  0. 1.0000     0. 
  -3  16  -1      3.48    0.18  0. 1.0000     0. 
   3  16   1      3.40    0.15  0. 1.0000     0. 
   4  16   1      0.39    0.06  0. 1.0000     0. 
  -4  16  -1      0.47    0.08  0. 1.0000     0. 
   5  16   1      4.58    0.17  0. 1.0000     0. 
   3  17  -1      0.86    0.08  0. 1.0000     0. 
  -3  17   1      1.03    0.09  0. 1.0000     0. 
  -2  17   1      0.62    0.07  0. 1.0000     0. 
   2  17  -1      0.62    0.07  0. 1.0000     0. 
  -1  17   1      2.64    0.13  0. 1.0000     0. 
   1  17  -1      2.67    0.13  0. 1.0000     0. 
   0  17   1     -0.06    0.04  0. 1.0000     0. 
   0  17   1      0.04    0.05  0. 1.0000     0. 
   0  17  -1      0.01    0.05  0. 1.0000     0. 
   0  17  -1     -0.01    0.05  0. 1.0000     0. 
  -1  17  -1      0.22    0.06  0. 1.0000     0. 
   1  17   1      0.21    0.06  0. 1.0000     0. 
   2  17   1      0.96    0.08  0. 1.0000     0. 
  -2  17  -1      0.51    0.07  0. 1.0000     0. 
  -3  17  -1      7.87    0.28  0. 1.0000     0. 
   3  17   1      7.49    0.26  0. 1.0000     0. 
  11   0  -2      6.82    0.24  0. 1.0000     0. 
  11   0  -2      6.47    0.24  0. 1.0000     0. 
  10   0  -2     24.08    0.78  0. 1.0000     0. 
 -10   0   2     25.84    1.06  0. 1.0000     0. 
   9   0  -2     89.49    2.56  0. 1.0000     0. 
  -9   0   2     83.93    3.05  0. 1.0000     0. 
   9   0  -2     83.76    2.80  0. 1.0000     0. 
  -8   0   2     36.88    1.43  0. 1.0000     0. 
   8   0  -2     34.17    1.12  0. 1.0000     0. 
   8   0  -2     33.81    1.19  0. 1.0000     0. 
   8   0  -2     33.89    1.20  0. 1.0000     0. 
   8   0  -2     37.18    1.47  0. 1.0000     0. 
   8   0  -2     35.27    1.08  0. 1.0000     0. 
   8   0  -2     36.03    1.19  0. 1.0000     0. 
  -7   0   2      6.80    0.50  0. 1.0000     0. 
  -7   0   2      7.12    0.47  0. 1.0000     0. 
   7   0  -2      7.63    0.48  0. 1.0000     0. 
  -6   0   2     20.45    0.91  0. 1.0000     0. 
   6   0  -2     19.52    0.87  0. 1.0000     0. 
   5   0  -2     64.70    2.26  0. 1.0000     0. 
  -5   0   2     62.11    2.29  0. 1.0000     0. 
   4   0  -2    198.07    7.45  0. 1.0000     0. 
   4   0  -2    203.28    6.78  0. 1.0000     0. 
   4   0  -2    197.50    7.46  0. 1.0000     0. 
  -4   0   2    216.67    6.89  0. 1.0000     0. 
  -3   0   2    131.40    5.07  0. 1.0000     0. 
   3   0  -2    125.59    4.66  0. 1.0000     0. 
  -3   0   2    131.81    4.30  0. 1.0000     0. 
   3   0  -2    122.04    4.65  0. 1.0000     0. 
  -3   0   2    121.45    5.32  0. 1.0000     0. 
   2   0  -2    372.02   14.15  0. 1.0000     0. 
   2   0  -2    410.04   14.16  0. 1.0000     0. 
  -2   0   2    380.76   16.14  0. 1.0000     0. 
  -1   0   2    213.16   10.30  0. 1.0000     0. 
   1   0  -2    283.12   10.36  0. 1.0000     0. 
   0   0  -2     -0.42    0.01  0. 1.0000     0. 
   0   0   2     -0.41    0.01  0. 1.0000     0. 
  -3   0  -2    350.28   11.79  0. 1.0000     0. 
  -3   0  -2    357.49   14.71  0. 1.0000     0. 
  -4   0  -2     27.84    1.23  0. 1.0000     0. 
  -4   0  -2     28.20    1.05  0. 1.0000     0. 
   4   0   2     25.70    1.02  0. 1.0000     0. 
  -5   0  -2     81.48    2.96  0. 1.0000     0. 
   5   0   2     87.14    2.94  0. 1.0000     0. 
  -6   0  -2      4.60    0.37  0. 1.0000     0. 
   6   0   2      5.04    0.36  0. 1.0000     0. 
   7   0   2     26.66    1.15  0. 1.0000     0. 
   7   0   2     29.55    0.93  0. 1.0000     0. 
   7   0   2     26.61    0.85  0. 1.0000     0. 
   7   0   2     26.41    0.92  0. 1.0000     0. 
  -8   0  -2      2.40    0.32  0. 1.0000     0. 
   8   0   2      2.28    0.35  0. 1.0000     0. 
   8   0   2      2.24    0.14  0. 1.0000     0. 
   8   0   2      2.28    0.16  0. 1.0000     0. 
   9   0   2      1.09    0.10  0. 1.0000     0. 
  -9   0  -2      0.89    0.23  0. 1.0000     0. 
 -10   0  -2      0.12    0.15  0. 1.0000     0. 
  10   0   2      0.07    0.06  0. 1.0000     0. 
  11   0   2      7.35    0.26  0. 1.0000     0. 
  11   0   2      7.23    0.26  0. 1.0000     0. 
  11  -1  -2      1.93    0.12  0. 1.0000     0. 
  11  -1  -2      1.92    0.12  0. 1.0000     0. 
  11   1  -2      1.83    0.11  0. 1.0000     0. 
 -10  -1   2     12.70    0.63  0. 1.0000     0. 
  10  -1  -2     11.20    0.40  0. 1.0000     0. 
  10  -1  -2     11.10    0.44  0. 1.0000     0. 
  10   1  -2     10.99    0.39  0. 1.0000     0. 
 -10   1   2     12.42    0.64  0. 1.0000     0. 
  -9  -1   2      8.48    0.55  0. 1.0000     0. 
   9  -1  -2      9.29    0.33  0. 1.0000     0. 
   9  -1  -2      8.59    0.38  0. 1.0000     0. 
   9  -1  -2      8.32    0.32  0. 1.0000     0. 
   9   1  -2      8.87    0.33  0. 1.0000     0. 
  -9   1   2      8.36    0.57  0. 1.0000     0. 
   8  -1  -2     25.01    0.84  0. 1.0000     0. 
   8  -1  -2     23.29    0.79  0. 1.0000     0. 
  -8  -1   2     22.94    1.05  0. 1.0000     0. 
   8  -1  -2     24.98    1.10  0. 1.0000     0. 
   8  -1  -2     23.62    0.76  0. 1.0000     0. 
   8  -1  -2     24.07    0.86  0. 1.0000     0. 
   8   1  -2     23.87    0.75  0. 1.0000     0. 
  -8   1   2     24.48    1.07  0. 1.0000     0. 
  -8   1   2     22.03    1.18  0. 1.0000     0. 
  -7  -1   2     14.06    0.69  0. 1.0000     0. 
   7  -1  -2     12.52    0.69  0. 1.0000     0. 
  -7  -1   2     13.14    0.74  0. 1.0000     0. 
   7   1  -2     13.24    0.70  0. 1.0000     0. 
  -7   1   2     13.88    0.75  0. 1.0000     0. 
   7   1  -2     14.40    0.49  0. 1.0000     0. 
   7   1  -2     14.17    0.47  0. 1.0000     0. 
  -6  -1   2      4.53    0.34  0. 1.0000     0. 
  -6  -1   2      4.47    0.38  0. 1.0000     0. 
   6  -1  -2      4.53    0.35  0. 1.0000     0. 
   6   1  -2      4.66    0.35  0. 1.0000     0. 
  -6   1   2      4.25    0.37  0. 1.0000     0. 
   5  -1  -2    182.38    6.00  0. 1.0000     0. 
  -5  -1   2    171.71    6.09  0. 1.0000     0. 
  -5   1   2    176.70    6.10  0. 1.0000     0. 
   5   1  -2    182.19    5.99  0. 1.0000     0. 
   4  -1  -2     11.41    0.50  0. 1.0000     0. 
   4  -1  -2     11.83    0.51  0. 1.0000     0. 
  -4  -1   2     11.28    0.53  0. 1.0000     0. 
   4  -1  -2     10.49    0.50  0. 1.0000     0. 
   4   1  -2     11.19    0.51  0. 1.0000     0. 
  -4   1   2     12.44    0.54  0. 1.0000     0. 
   3  -1  -2     12.15    0.49  0. 1.0000     0. 
  -3  -1   2     11.88    0.60  0. 1.0000     0. 
  -3  -1   2     13.28    0.62  0. 1.0000     0. 
   3  -1  -2     12.04    0.54  0. 1.0000     0. 
   3   1  -2     12.59    0.51  0. 1.0000     0. 
  -3   1   2     13.69    0.54  0. 1.0000     0. 
  -3   1   2     11.45    0.62  0. 1.0000     0. 
   3   1  -2     12.71    0.50  0. 1.0000     0. 
  -2  -1   2     43.67    1.70  0. 1.0000     0. 
   2  -1  -2     40.51    1.57  0. 1.0000     0. 
   2  -1  -2     40.15    1.77  0. 1.0000     0. 
   2  -1  -2     43.49    1.49  0. 1.0000     0. 
  -2  -1   2     40.10    1.77  0. 1.0000     0. 
  -2   1   2     40.24    1.78  0. 1.0000     0. 
   2   1  -2     40.39    1.55  0. 1.0000     0. 
   2   1  -2     41.57    1.54  0. 1.0000     0. 
  -1  -1   2    322.89   10.77  0. 1.0000     0. 
   1  -1  -2    314.19   12.88  0. 1.0000     0. 
  -1  -1   2    305.41   12.84  0. 1.0000     0. 
  -1  -1   2    304.42   12.12  0. 1.0000     0. 
   1  -1  -2    319.11   10.77  0. 1.0000     0. 
   1   1  -2    304.93   11.25  0. 1.0000     0. 
  -1   1   2    295.41   11.25  0. 1.0000     0. 
   1   1  -2    306.87   11.26  0. 1.0000     0. 
   1   1  -2    304.56   12.12  0. 1.0000     0. 
   1   1  -2    307.14   12.85  0. 1.0000     0. 
  -1   1   2    304.83   12.88  0. 1.0000     0. 
   0  -1   2    250.65   10.31  0. 1.0000     0. 
   0  -1   2    281.83    9.21  0. 1.0000     0. 
   0  -1  -2    256.65   10.34  0. 1.0000     0. 
   0  -1  -2    270.86    9.20  0. 1.0000     0. 
   0   1  -2    254.55    9.60  0. 1.0000     0. 
   0   1  -2    267.64   10.38  0. 1.0000     0. 
   0   1   2    262.23    9.61  0. 1.0000     0. 
  -1  -1  -2    291.20   11.68  0. 1.0000     0. 
   1  -1   2    305.69   10.43  0. 1.0000     0. 
   1  -1   2    298.17   10.88  0. 1.0000     0. 
  -1  -1  -2    311.00   10.43  0. 1.0000     0. 
  -1   1  -2    303.21   11.72  0. 1.0000     0. 
   1   1   2    283.10   11.72  0. 1.0000     0. 
   2  -1   2    265.08    9.68  0. 1.0000     0. 
   2  -1   2    273.91    9.28  0. 1.0000     0. 
  -2  -1  -2    271.24   10.43  0. 1.0000     0. 
  -2   1  -2    252.26   11.05  0. 1.0000     0. 
  -3  -1  -2     93.29    3.68  0. 1.0000     0. 
  -3   1  -2     92.63    3.12  0. 1.0000     0. 
  -3   1  -2     88.18    3.86  0. 1.0000     0. 
  -4  -1  -2      3.83    0.24  0. 1.0000     0. 
  -4  -1  -2      3.63    0.27  0. 1.0000     0. 
   4  -1   2      3.45    0.26  0. 1.0000     0. 
   4   1   2      3.96    0.26  0. 1.0000     0. 
  -4   1  -2      3.86    0.27  0. 1.0000     0. 
  -5  -1  -2      3.31    0.30  0. 1.0000     0. 
   5  -1   2      4.03    0.30  0. 1.0000     0. 
   5   1   2      3.77    0.29  0. 1.0000     0. 
  -5   1  -2      4.11    0.30  0. 1.0000     0. 
  -6  -1  -2      1.86    0.25  0. 1.0000     0. 
   6  -1   2      2.09    0.27  0. 1.0000     0. 
  -6   1  -2      1.83    0.25  0. 1.0000     0. 
   6   1   2      2.62    0.27  0. 1.0000     0. 
   7  -1   2     23.05    1.04  0. 1.0000     0. 
   7  -1   2     25.57    0.83  0. 1.0000     0. 
   7  -1   2     22.95    0.75  0. 1.0000     0. 
   7   1   2     23.72    1.05  0. 1.0000     0. 
   7   1   2     24.04    0.76  0. 1.0000     0. 
  -8  -1  -2     30.27    1.28  0. 1.0000     0. 
   8  -1   2     31.31    1.34  0. 1.0000     0. 
   8  -1   2     31.88    0.97  0. 1.0000     0. 
   8   1   2     31.26    0.97  0. 1.0000     0. 
   8   1   2     30.97    0.96  0. 1.0000     0. 
   9  -1   2      8.36    0.55  0. 1.0000     0. 
  -9  -1  -2      6.03    0.47  0. 1.0000     0. 
   9  -1   2      7.67    0.28  0. 1.0000     0. 
   9   1   2      6.65    0.27  0. 1.0000     0. 
  -9   1  -2      7.57    0.52  0. 1.0000     0. 
  10  -1   2      5.31    0.22  0. 1.0000     0. 
 -10   1  -2      5.64    0.43  0. 1.0000     0. 
  10   1   2      5.41    0.22  0. 1.0000     0. 
  11  -1   2      0.15    0.05  0. 1.0000     0. 
  11   1   2      0.25    0.05  0. 1.0000     0. 
  11   1   2      0.17    0.05  0. 1.0000     0. 
  11  -2  -2      2.84    0.14  0. 1.0000     0. 
  11   2  -2      2.70    0.13  0. 1.0000     0. 
  10  -2  -2      9.71    0.35  0. 1.0000     0. 
  10  -2  -2      9.88    0.40  0. 1.0000     0. 
  10   2  -2      9.58    0.34  0. 1.0000     0. 
  10   2  -2      9.61    0.34  0. 1.0000     0. 
 -10   2   2     10.52    0.58  0. 1.0000     0. 
   9  -2  -2     36.01    1.12  0. 1.0000     0. 
   9  -2  -2     37.16    1.52  0. 1.0000     0. 
   9  -2  -2     36.34    1.16  0. 1.0000     0. 
  -9  -2   2     35.22    1.43  0. 1.0000     0. 
   9  -2  -2     35.81    1.25  0. 1.0000     0. 
  -9   2   2     37.65    1.49  0. 1.0000     0. 
   9   2  -2     36.32    1.11  0. 1.0000     0. 
  -8  -2   2     37.82    1.51  0. 1.0000     0. 
   8  -2  -2     38.48    1.32  0. 1.0000     0. 
   8  -2  -2     39.27    1.18  0. 1.0000     0. 
   8  -2  -2     37.23    1.23  0. 1.0000     0. 
   8  -2  -2     39.27    1.32  0. 1.0000     0. 
   8  -2  -2     40.29    1.58  0. 1.0000     0. 
   8   2  -2     38.17    1.17  0. 1.0000     0. 
  -8   2   2     37.43    1.54  0. 1.0000     0. 
  -8   2   2     36.92    1.61  0. 1.0000     0. 
   7  -2  -2     -0.02    0.14  0. 1.0000     0. 
  -7  -2   2      0.07    0.14  0. 1.0000     0. 
  -7  -2   2      0.33    0.19  0. 1.0000     0. 
  -7   2   2      0.18    0.18  0. 1.0000     0. 
   7   2  -2      0.19    0.05  0. 1.0000     0. 
   7   2  -2      0.30    0.05  0. 1.0000     0. 
  -6  -2   2     31.13    1.26  0. 1.0000     0. 
  -6  -2   2     34.96    1.37  0. 1.0000     0. 
   6  -2  -2     34.86    1.32  0. 1.0000     0. 
   6   2  -2     31.15    1.30  0. 1.0000     0. 
  -6   2   2     33.93    1.36  0. 1.0000     0. 
   5  -2  -2     64.98    2.26  0. 1.0000     0. 
  -5  -2   2     60.93    2.30  0. 1.0000     0. 
   5  -2  -2     67.85    2.40  0. 1.0000     0. 
  -5   2   2     58.30    2.29  0. 1.0000     0. 
   5   2  -2     64.23    2.25  0. 1.0000     0. 
   4  -2  -2     35.74    1.34  0. 1.0000     0. 
  -4   2   2     37.37    1.37  0. 1.0000     0. 
   3  -2  -2     59.99    2.14  0. 1.0000     0. 
  -3  -2   2     59.64    2.44  0. 1.0000     0. 
  -3  -2   2     57.17    2.53  0. 1.0000     0. 
  -3   2   2     59.77    2.08  0. 1.0000     0. 
  -2  -2   2     29.58    1.37  0. 1.0000     0. 
  -2  -2   2     33.13    1.34  0. 1.0000     0. 
   2  -2  -2     32.43    1.40  0. 1.0000     0. 
   2  -2  -2     32.90    1.18  0. 1.0000     0. 
  -2  -2   2     33.47    1.17  0. 1.0000     0. 
  -2   2   2     30.99    1.40  0. 1.0000     0. 
   2   2  -2     31.39    1.19  0. 1.0000     0. 
   2   2  -2     31.28    1.34  0. 1.0000     0. 
  -2   2   2     30.48    1.23  0. 1.0000     0. 
  -2   2   2     32.65    1.14  0. 1.0000     0. 
   2   2  -2     30.38    1.19  0. 1.0000     0. 
  -1  -2   2    159.57    6.69  0. 1.0000     0. 
   1  -2  -2    162.31    6.70  0. 1.0000     0. 
  -1  -2   2    161.83    6.32  0. 1.0000     0. 
  -1  -2   2    170.41    5.64  0. 1.0000     0. 
   1  -2  -2    169.01    5.64  0. 1.0000     0. 
   1   2  -2    157.44    6.32  0. 1.0000     0. 
  -1   2   2    155.01    6.70  0. 1.0000     0. 
   1   2  -2    160.57    5.87  0. 1.0000     0. 
  -1   2   2    153.52    6.31  0. 1.0000     0. 
   1   2  -2    159.85    6.67  0. 1.0000     0. 
   1   2  -2    156.97    5.87  0. 1.0000     0. 
  -1   2   2    159.19    5.88  0. 1.0000     0. 
   0  -2  -2      1.12    0.13  0. 1.0000     0. 
   0  -2  -2      1.56    0.13  0. 1.0000     0. 
   0  -2   2      1.00    0.15  0. 1.0000     0. 
   0  -2  -2      1.11    0.11  0. 1.0000     0. 
   0  -2   2      1.01    0.14  0. 1.0000     0. 
   0   2  -2      1.10    0.13  0. 1.0000     0. 
   0   2   2      1.07    0.10  0. 1.0000     0. 
   0   2   2      0.94    0.13  0. 1.0000     0. 
   0   2  -2      1.13    0.14  0. 1.0000     0. 
   0   2  -2      0.94    0.12  0. 1.0000     0. 
  -1  -2  -2     12.39    0.55  0. 1.0000     0. 
   1  -2   2     13.59    0.53  0. 1.0000     0. 
   1  -2   2     13.44    0.57  0. 1.0000     0. 
   1  -2   2     12.11    0.52  0. 1.0000     0. 
  -1  -2  -2     13.74    0.51  0. 1.0000     0. 
   1   2   2     12.08    0.55  0. 1.0000     0. 
  -1   2  -2     12.68    0.57  0. 1.0000     0. 
   2  -2   2     21.53    0.87  0. 1.0000     0. 
  -2  -2  -2     22.91    0.95  0. 1.0000     0. 
  -2  -2  -2     22.55    0.82  0. 1.0000     0. 
   2  -2   2     23.28    0.85  0. 1.0000     0. 
   2   2   2     20.99    0.94  0. 1.0000     0. 
  -2   2  -2     20.62    0.99  0. 1.0000     0. 
  -2   2  -2     22.86    0.96  0. 1.0000     0. 
  -3  -2  -2    116.69    4.56  0. 1.0000     0. 
   3  -2   2    111.62    4.20  0. 1.0000     0. 
   3  -2   2    113.84    4.03  0. 1.0000     0. 
  -3   2  -2    117.08    3.87  0. 1.0000     0. 
  -3   2  -2    109.48    4.81  0. 1.0000     0. 
   4  -2   2      8.19    0.37  0. 1.0000     0. 
   4  -2   2      8.95    0.44  0. 1.0000     0. 
  -4  -2  -2      8.38    0.43  0. 1.0000     0. 
   4  -2   2      8.94    0.38  0. 1.0000     0. 
   4   2   2      8.10    0.41  0. 1.0000     0. 
  -4   2  -2      9.50    0.44  0. 1.0000     0. 
  -5  -2  -2    141.64    4.93  0. 1.0000     0. 
   5  -2   2    148.95    4.88  0. 1.0000     0. 
   5   2   2    144.91    4.86  0. 1.0000     0. 
   5   2   2    140.33    4.86  0. 1.0000     0. 
  -5   2  -2    141.39    4.92  0. 1.0000     0. 
   6  -2   2      2.78    0.29  0. 1.0000     0. 
  -6   2  -2      2.73    0.31  0. 1.0000     0. 
   6   2   2      3.45    0.31  0. 1.0000     0. 
   6   2   2      3.46    0.30  0. 1.0000     0. 
   7  -2   2     41.13    1.32  0. 1.0000     0. 
   7  -2   2     36.70    1.53  0. 1.0000     0. 
  -7  -2  -2     38.21    1.48  0. 1.0000     0. 
   7   2   2     37.24    1.17  0. 1.0000     0. 
   7   2   2     37.88    1.53  0. 1.0000     0. 
   8  -2   2      0.15    0.07  0. 1.0000     0. 
   8  -2   2      0.04    0.04  0. 1.0000     0. 
   8  -2   2     -0.10    0.09  0. 1.0000     0. 
   8  -2   2      0.19    0.19  0. 1.0000     0. 
   8  -2   2      0.06    0.06  0. 1.0000     0. 
   8  -2   2      0.00    0.04  0. 1.0000     0. 
   8   2   2      0.00    0.05  0. 1.0000     0. 
   8   2   2     -0.02    0.08  0. 1.0000     0. 
   9  -2   2      3.45    0.23  0. 1.0000     0. 
   9  -2   2      3.64    0.18  0. 1.0000     0. 
   9  -2   2      3.07    0.40  0. 1.0000     0. 
  -9   2  -2      2.77    0.35  0. 1.0000     0. 
   9   2   2      2.92    0.16  0. 1.0000     0. 
  10  -2   2      2.79    0.15  0. 1.0000     0. 
 -10   2  -2      2.55    0.32  0. 1.0000     0. 
  10   2   2      2.30    0.13  0. 1.0000     0. 
  11  -2   2     -0.06    0.05  0. 1.0000     0. 
  11   2   2     -0.05    0.04  0. 1.0000     0. 
  11  -3  -2      0.03    0.05  0. 1.0000     0. 
  11   3  -2      0.03    0.04  0. 1.0000     0. 
  10  -3  -2      1.03    0.10  0. 1.0000     0. 
  10  -3  -2      1.24    0.14  0. 1.0000     0. 
  10   3  -2      1.22    0.11  0. 1.0000     0. 
 -10   3   2      1.59    0.26  0. 1.0000     0. 
   9  -3  -2      0.16    0.11  0. 1.0000     0. 
   9  -3  -2      0.13    0.07  0. 1.0000     0. 
   9  -3  -2      0.03    0.07  0. 1.0000     0. 
   9  -3  -2      0.10    0.05  0. 1.0000     0. 
   9  -3  -2      0.14    0.05  0. 1.0000     0. 
  -9   3   2     -0.11    0.15  0. 1.0000     0. 
   9   3  -2      0.22    0.06  0. 1.0000     0. 
   8  -3  -2     23.17    0.78  0. 1.0000     0. 
   8  -3  -2     23.72    0.83  0. 1.0000     0. 
   8  -3  -2     23.45    0.75  0. 1.0000     0. 
   8  -3  -2     23.53    0.85  0. 1.0000     0. 
   8  -3  -2     24.13    1.09  0. 1.0000     0. 
  -8   3   2     23.07    1.14  0. 1.0000     0. 
   8   3  -2     23.01    0.74  0. 1.0000     0. 
  -8   3   2     21.96    1.04  0. 1.0000     0. 
  -7  -3   2      1.11    0.26  0. 1.0000     0. 
   7  -3  -2      0.97    0.23  0. 1.0000     0. 
  -7  -3   2      1.69    0.26  0. 1.0000     0. 
  -7   3   2      0.84    0.25  0. 1.0000     0. 
   6  -3  -2      8.65    0.50  0. 1.0000     0. 
   6  -3  -2      8.19    0.23  0. 1.0000     0. 
  -6  -3   2      8.24    0.53  0. 1.0000     0. 
  -6  -3   2      8.83    0.47  0. 1.0000     0. 
  -6   3   2      8.30    0.52  0. 1.0000     0. 
   5  -3  -2     22.56    0.91  0. 1.0000     0. 
   5  -3  -2     21.33    0.90  0. 1.0000     0. 
  -5   3   2     20.20    0.92  0. 1.0000     0. 
   4  -3  -2     13.17    0.58  0. 1.0000     0. 
  -4   3   2     12.89    0.60  0. 1.0000     0. 
  -3  -3   2     39.89    1.83  0. 1.0000     0. 
  -3  -3   2     42.97    1.81  0. 1.0000     0. 
   3  -3  -2     42.20    1.58  0. 1.0000     0. 
  -3   3   2     44.37    1.54  0. 1.0000     0. 
  -2  -3   2     24.54    0.92  0. 1.0000     0. 
   2  -3  -2     23.66    1.08  0. 1.0000     0. 
  -2  -3   2     24.57    1.04  0. 1.0000     0. 
   2  -3  -2     24.55    0.94  0. 1.0000     0. 
  -2  -3   2     23.89    1.06  0. 1.0000     0. 
  -2   3   2     24.52    0.89  0. 1.0000     0. 
  -2   3   2     23.29    1.08  0. 1.0000     0. 
   2   3  -2     23.49    0.91  0. 1.0000     0. 
   2   3  -2     23.31    0.90  0. 1.0000     0. 
  -2   3   2     23.15    1.04  0. 1.0000     0. 
   2   3  -2     23.02    1.04  0. 1.0000     0. 
   1  -3  -2    273.24   10.08  0. 1.0000     0. 
  -1  -3   2    264.11   10.09  0. 1.0000     0. 
   1  -3  -2    261.84    9.00  0. 1.0000     0. 
  -1  -3   2    267.27    9.01  0. 1.0000     0. 
   1  -3  -2    254.65   10.69  0. 1.0000     0. 
   1   3  -2    254.44    9.36  0. 1.0000     0. 
  -1   3   2    251.42    9.38  0. 1.0000     0. 
  -1   3   2    248.60   10.08  0. 1.0000     0. 
   1   3  -2    252.27   10.09  0. 1.0000     0. 
   1   3  -2    236.30    9.36  0. 1.0000     0. 
   0  -3  -2     59.71    2.14  0. 1.0000     0. 
   0  -3   2     61.28    2.39  0. 1.0000     0. 
   0  -3  -2     54.74    2.49  0. 1.0000     0. 
   0  -3   2     60.97    2.16  0. 1.0000     0. 
   0  -3  -2     61.81    2.38  0. 1.0000     0. 
   0   3   2     59.34    2.18  0. 1.0000     0. 
   0   3   2     58.10    2.38  0. 1.0000     0. 
   0   3  -2     58.87    2.39  0. 1.0000     0. 
   0   3  -2     56.06    2.20  0. 1.0000     0. 
  -1  -3  -2     13.19    0.54  0. 1.0000     0. 
  -1  -3  -2     13.05    0.59  0. 1.0000     0. 
   1  -3   2     13.17    0.61  0. 1.0000     0. 
   1  -3   2     13.69    0.58  0. 1.0000     0. 
  -1   3  -2     12.39    0.55  0. 1.0000     0. 
  -1   3  -2     12.35    0.60  0. 1.0000     0. 
   1   3   2     12.69    0.59  0. 1.0000     0. 
  -1   3  -2     12.28    0.62  0. 1.0000     0. 
   2  -3   2     35.40    1.43  0. 1.0000     0. 
  -2  -3  -2     38.04    1.55  0. 1.0000     0. 
   2  -3   2     39.47    1.41  0. 1.0000     0. 
  -2  -3  -2     38.61    1.38  0. 1.0000     0. 
   2   3   2     35.92    1.55  0. 1.0000     0. 
  -2   3  -2     35.21    1.44  0. 1.0000     0. 
  -2   3  -2     39.30    1.33  0. 1.0000     0. 
  -2   3  -2     35.92    1.56  0. 1.0000     0. 
  -3  -3  -2     15.93    0.74  0. 1.0000     0. 
   3  -3   2     13.79    0.65  0. 1.0000     0. 
   3  -3   2     15.49    0.66  0. 1.0000     0. 
  -3   3  -2     16.77    0.64  0. 1.0000     0. 
  -4  -3  -2     20.98    0.94  0. 1.0000     0. 
   4  -3   2     21.70    0.85  0. 1.0000     0. 
  -4   3  -2     20.21    0.85  0. 1.0000     0. 
   5  -3   2     41.96    1.52  0. 1.0000     0. 
  -5   3  -2     40.02    1.52  0. 1.0000     0. 
   5   3   2     37.96    1.50  0. 1.0000     0. 
   6  -3   2      0.60    0.18  0. 1.0000     0. 
   6   3   2      1.02    0.21  0. 1.0000     0. 
  -6   3  -2      1.00    0.22  0. 1.0000     0. 
   7  -3   2     22.27    0.77  0. 1.0000     0. 
   7  -3   2     19.99    0.97  0. 1.0000     0. 
   7   3   2     22.25    0.99  0. 1.0000     0. 
   7   3   2     21.24    0.69  0. 1.0000     0. 
   8  -3   2     32.14    1.10  0. 1.0000     0. 
   8  -3   2     31.23    1.11  0. 1.0000     0. 
   8  -3   2     33.29    1.39  0. 1.0000     0. 
   8  -3   2     31.81    1.03  0. 1.0000     0. 
   8  -3   2     32.56    1.00  0. 1.0000     0. 
   8   3   2     31.64    0.98  0. 1.0000     0. 
   9  -3   2      8.44    0.32  0. 1.0000     0. 
   9  -3   2      7.67    0.37  0. 1.0000     0. 
   9   3   2      8.08    0.30  0. 1.0000     0. 
  -9   3  -2      8.83    0.57  0. 1.0000     0. 
  10  -3   2      0.91    0.10  0. 1.0000     0. 
  10  -3   2      0.92    0.13  0. 1.0000     0. 
 -10   3  -2      0.72    0.20  0. 1.0000     0. 
  10   3   2      1.12    0.10  0. 1.0000     0. 
  10   3   2      1.16    0.10  0. 1.0000     0. 
  11  -3   2      1.31    0.10  0. 1.0000     0. 
  11   3   2      1.12    0.08  0. 1.0000     0. 
  11  -4  -2      0.97    0.09  0. 1.0000     0. 
  11   4  -2      0.87    0.08  0. 1.0000     0. 
  10  -4  -2      9.48    0.35  0. 1.0000     0. 
  10  -4  -2     10.06    0.35  0. 1.0000     0. 
  10  -4  -2     10.05    0.41  0. 1.0000     0. 
  10   4  -2     10.04    0.34  0. 1.0000     0. 
 -10   4   2     10.27    0.58  0. 1.0000     0. 
   9  -4  -2      6.36    0.25  0. 1.0000     0. 
   9  -4  -2      5.81    0.26  0. 1.0000     0. 
   9  -4  -2      5.54    0.31  0. 1.0000     0. 
   9  -4  -2      6.28    0.26  0. 1.0000     0. 
   9   4  -2      5.79    0.24  0. 1.0000     0. 
  -9   4   2      5.96    0.49  0. 1.0000     0. 
   9   4  -2      5.91    0.24  0. 1.0000     0. 
   8  -4  -2      2.25    0.17  0. 1.0000     0. 
   8  -4  -2      2.37    0.22  0. 1.0000     0. 
   8  -4  -2      2.27    0.16  0. 1.0000     0. 
   8  -4  -2      3.16    0.41  0. 1.0000     0. 
   8   4  -2      2.32    0.14  0. 1.0000     0. 
  -8   4   2      2.20    0.33  0. 1.0000     0. 
  -7  -4   2      1.69    0.30  0. 1.0000     0. 
   7  -4  -2      1.55    0.27  0. 1.0000     0. 
  -7   4   2      1.42    0.28  0. 1.0000     0. 
   6  -4  -2      6.57    0.20  0. 1.0000     0. 
  -6  -4   2      7.21    0.48  0. 1.0000     0. 
   6  -4  -2      6.47    0.45  0. 1.0000     0. 
  -6   4   2      6.12    0.46  0. 1.0000     0. 
   5  -4  -2     89.65    3.11  0. 1.0000     0. 
  -5   4   2     87.78    3.16  0. 1.0000     0. 
   4  -4  -2     13.27    0.61  0. 1.0000     0. 
  -4   4   2     13.78    0.63  0. 1.0000     0. 
   3  -4  -2     20.65    0.88  0. 1.0000     0. 
   3  -4  -2     20.69    0.82  0. 1.0000     0. 
  -3   4   2     21.74    0.85  0. 1.0000     0. 
  -2  -4   2      8.26    0.44  0. 1.0000     0. 
  -2  -4   2      7.70    0.40  0. 1.0000     0. 
   2  -4  -2      8.18    0.41  0. 1.0000     0. 
  -2   4   2      8.46    0.40  0. 1.0000     0. 
  -2   4   2      7.51    0.39  0. 1.0000     0. 
   2   4  -2      7.58    0.33  0. 1.0000     0. 
   2   4  -2      7.54    0.33  0. 1.0000     0. 
   1  -4  -2     26.81    1.05  0. 1.0000     0. 
   1  -4  -2     26.87    1.19  0. 1.0000     0. 
  -1  -4   2     26.79    1.15  0. 1.0000     0. 
  -1  -4   2     25.77    1.05  0. 1.0000     0. 
   1  -4  -2     26.82    1.14  0. 1.0000     0. 
  -1   4   2     26.63    1.04  0. 1.0000     0. 
  -1   4   2     27.02    0.98  0. 1.0000     0. 
  -1   4   2     23.77    1.13  0. 1.0000     0. 
   1   4  -2     26.08    1.16  0. 1.0000     0. 
   1   4  -2     27.32    1.02  0. 1.0000     0. 
   1   4  -2     26.23    1.03  0. 1.0000     0. 
   0  -4  -2    146.40    5.30  0. 1.0000     0. 
   0  -4   2    148.47    5.31  0. 1.0000     0. 
   0  -4  -2    142.61    6.24  0. 1.0000     0. 
   0  -4   2    148.35    6.27  0. 1.0000     0. 
   0  -4  -2    161.11    5.92  0. 1.0000     0. 
   0  -4   2    155.12    5.93  0. 1.0000     0. 
   0   4  -2    148.94    5.93  0. 1.0000     0. 
   0   4   2    147.66    5.92  0. 1.0000     0. 
   0   4  -2    145.28    5.49  0. 1.0000     0. 
   0   4   2    146.83    5.47  0. 1.0000     0. 
   1  -4   2     12.29    0.58  0. 1.0000     0. 
  -1  -4  -2     11.02    0.57  0. 1.0000     0. 
  -1  -4  -2     10.67    0.52  0. 1.0000     0. 
   1  -4   2     14.43    0.58  0. 1.0000     0. 
  -1  -4  -2     10.80    0.53  0. 1.0000     0. 
   1   4   2     11.23    0.56  0. 1.0000     0. 
  -1   4  -2     12.33    0.58  0. 1.0000     0. 
  -2  -4  -2      6.33    0.35  0. 1.0000     0. 
  -2  -4  -2      6.78    0.38  0. 1.0000     0. 
   2  -4   2      6.40    0.38  0. 1.0000     0. 
  -2   4  -2      7.13    0.34  0. 1.0000     0. 
   2   4   2      6.34    0.38  0. 1.0000     0. 
   3  -4   2      7.90    0.45  0. 1.0000     0. 
  -3   4  -2      8.68    0.42  0. 1.0000     0. 
  -4  -4  -2     39.40    1.68  0. 1.0000     0. 
   4  -4   2     38.57    1.43  0. 1.0000     0. 
  -4   4  -2     37.52    1.44  0. 1.0000     0. 
   5  -4   2     96.69    3.31  0. 1.0000     0. 
  -5   4  -2     94.14    3.34  0. 1.0000     0. 
   5   4   2     93.14    3.31  0. 1.0000     0. 
   6  -4   2      2.56    0.31  0. 1.0000     0. 
  -6   4  -2      2.33    0.31  0. 1.0000     0. 
   6   4   2      2.71    0.32  0. 1.0000     0. 
   7  -4   2     10.74    0.64  0. 1.0000     0. 
   7   4   2     10.95    0.40  0. 1.0000     0. 
   8  -4   2      0.15    0.07  0. 1.0000     0. 
   8  -4   2      0.08    0.06  0. 1.0000     0. 
   8  -4   2      0.11    0.18  0. 1.0000     0. 
   8  -4   2      0.10    0.07  0. 1.0000     0. 
   8  -4   2      0.16    0.11  0. 1.0000     0. 
   8   4   2      0.05    0.06  0. 1.0000     0. 
   9  -4   2     40.31    1.39  0. 1.0000     0. 
   9  -4   2     39.74    1.29  0. 1.0000     0. 
   9  -4   2     42.39    1.26  0. 1.0000     0. 
  -9   4  -2     42.11    1.64  0. 1.0000     0. 
   9   4   2     40.09    1.23  0. 1.0000     0. 
   9   4   2     40.83    1.24  0. 1.0000     0. 
  10  -4   2      1.64    0.13  0. 1.0000     0. 
  10  -4   2      1.72    0.17  0. 1.0000     0. 
 -10   4  -2      1.59    0.25  0. 1.0000     0. 
  10   4   2      1.71    0.11  0. 1.0000     0. 
  11  -4   2      0.83    0.08  0. 1.0000     0. 
  10  -5  -2      0.40    0.08  0. 1.0000     0. 
  10  -5  -2      0.55    0.11  0. 1.0000     0. 
  10  -5  -2      0.54    0.08  0. 1.0000     0. 
  10   5  -2      0.49    0.07  0. 1.0000     0. 
   9  -5  -2      0.14    0.08  0. 1.0000     0. 
   9  -5  -2      0.01    0.10  0. 1.0000     0. 
   9  -5  -2      0.02    0.06  0. 1.0000     0. 
   9  -5  -2     -0.03    0.06  0. 1.0000     0. 
   9   5  -2      0.04    0.06  0. 1.0000     0. 
  -9   5   2     -0.02    0.16  0. 1.0000     0. 
   8  -5  -2      0.15    0.11  0. 1.0000     0. 
   8  -5  -2      0.25    0.08  0. 1.0000     0. 
   8  -5  -2      0.11    0.08  0. 1.0000     0. 
   8  -5  -2     -0.07    0.18  0. 1.0000     0. 
   8   5  -2      0.17    0.06  0. 1.0000     0. 
  -8   5   2      0.04    0.15  0. 1.0000     0. 
   7  -5  -2      0.55    0.21  0. 1.0000     0. 
  -7  -5   2      0.69    0.25  0. 1.0000     0. 
   7  -5  -2      0.81    0.11  0. 1.0000     0. 
   7  -5  -2      1.09    0.12  0. 1.0000     0. 
   7  -5  -2      0.69    0.10  0. 1.0000     0. 
   7  -5  -2      0.66    0.14  0. 1.0000     0. 
   7   5  -2      0.76    0.09  0. 1.0000     0. 
  -7   5   2      0.78    0.25  0. 1.0000     0. 
   7   5  -2      0.83    0.09  0. 1.0000     0. 
   6  -5  -2      7.72    0.50  0. 1.0000     0. 
   6  -5  -2      7.76    0.23  0. 1.0000     0. 
  -6   5   2      7.34    0.52  0. 1.0000     0. 
   5  -5  -2     34.33    1.34  0. 1.0000     0. 
  -5   5   2     33.76    1.37  0. 1.0000     0. 
   4  -5  -2      3.37    0.28  0. 1.0000     0. 
  -4   5   2      2.61    0.29  0. 1.0000     0. 
   3  -5  -2     28.51    1.16  0. 1.0000     0. 
   3  -5  -2     26.81    1.07  0. 1.0000     0. 
  -3   5   2     28.75    1.11  0. 1.0000     0. 
  -2  -5   2     11.71    0.58  0. 1.0000     0. 
   2  -5  -2     11.61    0.58  0. 1.0000     0. 
  -2   5   2     13.02    0.55  0. 1.0000     0. 
  -2   5   2     11.27    0.56  0. 1.0000     0. 
  -1  -5   2    100.92    4.10  0. 1.0000     0. 
  -1  -5   2     95.06    3.68  0. 1.0000     0. 
   1  -5  -2    102.46    4.32  0. 1.0000     0. 
   1  -5  -2    107.49    4.10  0. 1.0000     0. 
   1  -5  -2     96.04    3.67  0. 1.0000     0. 
  -1   5   2    104.25    3.78  0. 1.0000     0. 
   1   5  -2    101.77    3.76  0. 1.0000     0. 
   1   5  -2    102.27    3.75  0. 1.0000     0. 
   0  -5  -2    137.56    6.04  0. 1.0000     0. 
   0  -5  -2    151.63    5.74  0. 1.0000     0. 
   0  -5   2    148.52    5.75  0. 1.0000     0. 
   0  -5   2    138.56    5.15  0. 1.0000     0. 
   0  -5  -2    136.14    5.13  0. 1.0000     0. 
   0   5  -2    147.67    5.31  0. 1.0000     0. 
   0   5   2    143.98    5.74  0. 1.0000     0. 
   0   5   2    146.93    5.29  0. 1.0000     0. 
   0   5   2    141.28    5.28  0. 1.0000     0. 
  -1  -5  -2     23.35    0.99  0. 1.0000     0. 
   1  -5   2     23.34    1.02  0. 1.0000     0. 
  -1  -5  -2     25.15    1.09  0. 1.0000     0. 
   1  -5   2     24.36    1.10  0. 1.0000     0. 
  -1  -5  -2     25.36    1.09  0. 1.0000     0. 
  -1   5  -2     24.69    1.00  0. 1.0000     0. 
  -2  -5  -2      0.13    0.07  0. 1.0000     0. 
  -2  -5  -2      0.17    0.11  0. 1.0000     0. 
   2  -5   2      0.10    0.12  0. 1.0000     0. 
  -2  -5  -2      0.09    0.11  0. 1.0000     0. 
   3  -5   2      1.46    0.22  0. 1.0000     0. 
  -3  -5  -2      1.74    0.16  0. 1.0000     0. 
  -3  -5  -2      1.96    0.17  0. 1.0000     0. 
  -3   5  -2      1.73    0.22  0. 1.0000     0. 
   4  -5   2     48.15    1.74  0. 1.0000     0. 
  -4   5  -2     45.50    1.74  0. 1.0000     0. 
   4   5   2     47.69    1.75  0. 1.0000     0. 
   5  -5   2     13.12    0.65  0. 1.0000     0. 
   5   5   2     12.43    0.64  0. 1.0000     0. 
  -5   5  -2     12.27    0.63  0. 1.0000     0. 
   6  -5   2     27.07    1.15  0. 1.0000     0. 
  -6   5  -2     26.42    1.14  0. 1.0000     0. 
   6   5   2     25.64    0.82  0. 1.0000     0. 
   7  -5   2      1.07    0.12  0. 1.0000     0. 
   7  -5   2      1.02    0.11  0. 1.0000     0. 
   7  -5   2      1.03    0.16  0. 1.0000     0. 
   7  -5   2      1.34    0.28  0. 1.0000     0. 
   7  -5   2      0.99    0.11  0. 1.0000     0. 
   7   5   2      1.13    0.10  0. 1.0000     0. 
   8  -5   2     50.60    1.98  0. 1.0000     0. 
   8  -5   2     48.95    1.56  0. 1.0000     0. 
   8  -5   2     49.03    1.66  0. 1.0000     0. 
   8  -5   2     49.76    1.68  0. 1.0000     0. 
   8  -5   2     50.53    1.50  0. 1.0000     0. 
   8   5   2     48.43    1.48  0. 1.0000     0. 
   8   5   2     47.36    1.47  0. 1.0000     0. 
   9  -5   2     12.44    0.44  0. 1.0000     0. 
   9  -5   2     11.69    0.50  0. 1.0000     0. 
   9  -5   2     12.60    0.44  0. 1.0000     0. 
  -9   5  -2     12.86    0.70  0. 1.0000     0. 
   9   5   2     12.45    0.41  0. 1.0000     0. 
  10  -5   2      2.40    0.20  0. 1.0000     0. 
  10  -5   2      2.24    0.14  0. 1.0000     0. 
  10   5   2      2.39    0.09  0. 1.0000     0. 
  10   5   2      2.38    0.12  0. 1.0000     0. 
  10  -6  -2      2.62    0.15  0. 1.0000     0. 
  10  -6  -2      2.79    0.15  0. 1.0000     0. 
  10  -6  -2      2.76    0.20  0. 1.0000     0. 
  10   6  -2      2.64    0.13  0. 1.0000     0. 
   9  -6  -2      1.04    0.11  0. 1.0000     0. 
   9  -6  -2      0.95    0.10  0. 1.0000     0. 
   9  -6  -2      0.72    0.14  0. 1.0000     0. 
   9  -6  -2      0.93    0.11  0. 1.0000     0. 
  -9   6   2      0.98    0.23  0. 1.0000     0. 
   9   6  -2      1.02    0.09  0. 1.0000     0. 
   8  -6  -2      0.91    0.11  0. 1.0000     0. 
   8  -6  -2      0.87    0.12  0. 1.0000     0. 
   8  -6  -2      0.62    0.24  0. 1.0000     0. 
   8  -6  -2      0.63    0.14  0. 1.0000     0. 
  -8   6   2      0.68    0.22  0. 1.0000     0. 
   8   6  -2      0.66    0.09  0. 1.0000     0. 
   7  -6  -2      0.14    0.19  0. 1.0000     0. 
  -7  -6   2     -0.25    0.18  0. 1.0000     0. 
   7  -6  -2      0.19    0.08  0. 1.0000     0. 
   7  -6  -2      0.16    0.09  0. 1.0000     0. 
   7  -6  -2      0.13    0.11  0. 1.0000     0. 
   7  -6  -2      0.16    0.09  0. 1.0000     0. 
  -7   6   2      0.21    0.21  0. 1.0000     0. 
   7   6  -2      0.06    0.06  0. 1.0000     0. 
   6  -6  -2      1.10    0.25  0. 1.0000     0. 
   6  -6  -2      0.98    0.08  0. 1.0000     0. 
  -6   6   2      1.18    0.26  0. 1.0000     0. 
   5  -6  -2      5.72    0.41  0. 1.0000     0. 
  -5   6   2      5.35    0.42  0. 1.0000     0. 
   4  -6  -2     25.89    1.03  0. 1.0000     0. 
  -4   6   2     24.09    1.05  0. 1.0000     0. 
   3  -6  -2      2.07    0.27  0. 1.0000     0. 
   3  -6  -2      2.48    0.26  0. 1.0000     0. 
  -3   6   2      2.74    0.29  0. 1.0000     0. 
  -2  -6   2      0.78    0.18  0. 1.0000     0. 
   2  -6  -2      0.77    0.17  0. 1.0000     0. 
  -2   6   2      0.95    0.16  0. 1.0000     0. 
  -1  -6   2      7.89    0.48  0. 1.0000     0. 
   1  -6  -2      7.53    0.45  0. 1.0000     0. 
   1   6  -2      7.14    0.36  0. 1.0000     0. 
   1   6  -2      7.56    0.36  0. 1.0000     0. 
  -1   6   2      7.06    0.39  0. 1.0000     0. 
  -1   6   2      7.87    0.39  0. 1.0000     0. 
   0  -6  -2     -0.10    0.12  0. 1.0000     0. 
   0  -6  -2      0.00    0.09  0. 1.0000     0. 
   0  -6   2      0.15    0.13  0. 1.0000     0. 
   0   6   2     -0.02    0.06  0. 1.0000     0. 
   0   6   2     -0.03    0.09  0. 1.0000     0. 
   0   6   2     -0.03    0.07  0. 1.0000     0. 
  -1  -6  -2     91.88    3.44  0. 1.0000     0. 
  -1  -6  -2     98.23    3.99  0. 1.0000     0. 
   1  -6   2     92.90    3.46  0. 1.0000     0. 
   1   6   2     92.53    3.34  0. 1.0000     0. 
  -1   6  -2     92.13    3.53  0. 1.0000     0. 
  -2  -6  -2      2.80    0.28  0. 1.0000     0. 
   2  -6   2      2.74    0.32  0. 1.0000     0. 
  -2  -6  -2      3.35    0.25  0. 1.0000     0. 
   2   6   2      2.92    0.25  0. 1.0000     0. 
  -3  -6  -2      2.26    0.22  0. 1.0000     0. 
   3  -6   2      1.86    0.26  0. 1.0000     0. 
   4  -6   2     16.82    0.77  0. 1.0000     0. 
  -4   6  -2     15.99    0.75  0. 1.0000     0. 
   5  -6   2     47.13    1.78  0. 1.0000     0. 
   5  -6   2     45.58    1.24  0. 1.0000     0. 
  -5   6  -2     46.04    1.78  0. 1.0000     0. 
   6  -6   2      5.19    0.15  0. 1.0000     0. 
   6  -6   2      5.09    0.43  0. 1.0000     0. 
  -6   6  -2      5.27    0.44  0. 1.0000     0. 
   7  -6   2      2.87    0.22  0. 1.0000     0. 
   7  -6   2      3.07    0.18  0. 1.0000     0. 
   7  -6   2      3.41    0.43  0. 1.0000     0. 
   7  -6   2      2.96    0.20  0. 1.0000     0. 
   7   6   2      2.98    0.15  0. 1.0000     0. 
   8  -6   2     10.41    0.41  0. 1.0000     0. 
   8  -6   2     10.49    0.45  0. 1.0000     0. 
   8  -6   2     10.65    0.41  0. 1.0000     0. 
   8  -6   2     11.15    0.39  0. 1.0000     0. 
   8   6   2      9.98    0.36  0. 1.0000     0. 
   9  -6   2     17.34    0.59  0. 1.0000     0. 
   9  -6   2     16.58    0.60  0. 1.0000     0. 
   9  -6   2     17.78    0.60  0. 1.0000     0. 
   9  -6   2     17.41    0.58  0. 1.0000     0. 
   9  -6   2     17.70    0.66  0. 1.0000     0. 
  -9   6  -2     18.57    0.86  0. 1.0000     0. 
   9   6   2     17.37    0.55  0. 1.0000     0. 
  10  -6   2      2.85    0.20  0. 1.0000     0. 
  10  -6   2      2.98    0.15  0. 1.0000     0. 
  10   6   2      2.56    0.09  0. 1.0000     0. 
  10   6   2      2.58    0.12  0. 1.0000     0. 
  10  -7  -2      0.97    0.09  0. 1.0000     0. 
  10  -7  -2      1.07    0.13  0. 1.0000     0. 
  10   7  -2      0.94    0.08  0. 1.0000     0. 
   9  -7  -2      0.19    0.07  0. 1.0000     0. 
   9  -7  -2      0.05    0.10  0. 1.0000     0. 
   9  -7  -2      0.02    0.08  0. 1.0000     0. 
   9   7  -2      0.07    0.06  0. 1.0000     0. 
  -9   7   2      0.18    0.15  0. 1.0000     0. 
   8  -7  -2     12.19    0.45  0. 1.0000     0. 
   8  -7  -2     11.88    0.50  0. 1.0000     0. 
  -8   7   2     11.59    0.66  0. 1.0000     0. 
   8   7  -2     11.57    0.40  0. 1.0000     0. 
   7  -7  -2      2.86    0.20  0. 1.0000     0. 
   7  -7  -2      2.88    0.20  0. 1.0000     0. 
   7  -7  -2      2.79    0.39  0. 1.0000     0. 
   7  -7  -2      2.68    0.23  0. 1.0000     0. 
   7   7  -2      2.66    0.15  0. 1.0000     0. 
   6  -7  -2      3.66    0.38  0. 1.0000     0. 
   6  -7  -2      3.66    0.15  0. 1.0000     0. 
  -6   7   2      3.43    0.42  0. 1.0000     0. 
   5  -7  -2     33.25    1.40  0. 1.0000     0. 
   5   7  -2     34.87    1.16  0. 1.0000     0. 
  -5   7   2     35.68    1.44  0. 1.0000     0. 
   4  -7  -2     17.87    0.83  0. 1.0000     0. 
  -4   7   2     17.99    0.84  0. 1.0000     0. 
   3  -7  -2      3.45    0.36  0. 1.0000     0. 
  -2  -7   2     61.74    2.34  0. 1.0000     0. 
   2  -7  -2     61.02    2.35  0. 1.0000     0. 
  -2   7   2     58.47    2.23  0. 1.0000     0. 
  -2   7   2     59.96    2.35  0. 1.0000     0. 
   1  -7  -2     14.05    0.71  0. 1.0000     0. 
  -1  -7   2     14.09    0.73  0. 1.0000     0. 
  -1   7   2     14.22    0.63  0. 1.0000     0. 
   1   7  -2     13.37    0.59  0. 1.0000     0. 
   1   7  -2     14.63    0.60  0. 1.0000     0. 
  -1   7   2     12.89    0.62  0. 1.0000     0. 
   0  -7   2     13.58    0.71  0. 1.0000     0. 
   0  -7  -2     12.14    0.67  0. 1.0000     0. 
   0   7   2     12.59    0.55  0. 1.0000     0. 
   0   7   2     12.98    0.55  0. 1.0000     0. 
   0   7  -2     13.56    0.60  0. 1.0000     0. 
   0   7   2     12.68    0.58  0. 1.0000     0. 
   1  -7   2    100.78    3.74  0. 1.0000     0. 
  -1  -7  -2    101.11    3.71  0. 1.0000     0. 
  -1  -7  -2    107.19    4.30  0. 1.0000     0. 
  -1   7  -2    100.85    3.79  0. 1.0000     0. 
   1   7   2     90.85    3.58  0. 1.0000     0. 
  -2  -7  -2     53.08    2.13  0. 1.0000     0. 
   2  -7   2     54.24    2.17  0. 1.0000     0. 
  -2  -7  -2     58.96    2.42  0. 1.0000     0. 
   2   7   2     52.59    2.04  0. 1.0000     0. 
   3  -7   2     15.30    0.81  0. 1.0000     0. 
   5  -7   2      1.99    0.31  0. 1.0000     0. 
   5  -7   2      2.42    0.11  0. 1.0000     0. 
   6  -7   2      2.53    0.10  0. 1.0000     0. 
   6  -7   2      2.88    0.19  0. 1.0000     0. 
   6  -7   2      2.40    0.36  0. 1.0000     0. 
   7  -7   2     16.27    0.86  0. 1.0000     0. 
   7  -7   2     14.31    0.51  0. 1.0000     0. 
   7  -7   2     15.28    0.58  0. 1.0000     0. 
   7  -7   2     14.82    0.54  0. 1.0000     0. 
   7   7   2     14.15    0.48  0. 1.0000     0. 
   8  -7   2     31.62    1.13  0. 1.0000     0. 
   8  -7   2     33.61    1.47  0. 1.0000     0. 
   8  -7   2     33.80    1.13  0. 1.0000     0. 
   8  -7   2     31.75    1.01  0. 1.0000     0. 
   8  -7   2     32.71    1.06  0. 1.0000     0. 
   8   7   2     30.91    0.98  0. 1.0000     0. 
   9  -7   2      0.09    0.07  0. 1.0000     0. 
   9  -7   2      0.13    0.05  0. 1.0000     0. 
   9  -7   2      0.07    0.04  0. 1.0000     0. 
   9  -7   2      0.11    0.08  0. 1.0000     0. 
   9  -7   2      0.20    0.11  0. 1.0000     0. 
  -9   7  -2      0.05    0.15  0. 1.0000     0. 
   9   7   2      0.07    0.05  0. 1.0000     0. 
   9   7   2      0.10    0.03  0. 1.0000     0. 
  10  -7   2      2.72    0.20  0. 1.0000     0. 
  10  -7   2      2.90    0.15  0. 1.0000     0. 
  10  -8  -2      4.01    0.21  0. 1.0000     0. 
  10  -8  -2      3.83    0.17  0. 1.0000     0. 
  10   8  -2      3.80    0.14  0. 1.0000     0. 
   9  -8  -2     13.50    0.53  0. 1.0000     0. 
   9  -8  -2     13.67    0.49  0. 1.0000     0. 
   9  -8  -2     13.66    0.50  0. 1.0000     0. 
   9   8  -2     13.74    0.44  0. 1.0000     0. 
   8  -8  -2      7.03    0.35  0. 1.0000     0. 
   8  -8  -2      7.68    0.32  0. 1.0000     0. 
   8   8  -2      7.05    0.27  0. 1.0000     0. 
  -8   8   2      6.99    0.49  0. 1.0000     0. 
   7  -8  -2      1.69    0.16  0. 1.0000     0. 
   7  -8  -2      2.67    0.22  0. 1.0000     0. 
   7  -8  -2      2.17    0.35  0. 1.0000     0. 
   7  -8  -2      2.11    0.19  0. 1.0000     0. 
   7   8  -2      2.02    0.14  0. 1.0000     0. 
   6  -8  -2     13.12    0.49  0. 1.0000     0. 
   6  -8  -2     13.26    0.39  0. 1.0000     0. 
   6  -8  -2     12.76    0.74  0. 1.0000     0. 
   6  -8  -2     12.87    0.51  0. 1.0000     0. 
   6   8  -2     12.89    0.44  0. 1.0000     0. 
   5  -8  -2     18.96    0.91  0. 1.0000     0. 
   4  -8  -2      9.65    0.58  0. 1.0000     0. 
   3  -8  -2      0.03    0.16  0. 1.0000     0. 
  -3   8   2      0.02    0.12  0. 1.0000     0. 
   2  -8  -2     -0.09    0.14  0. 1.0000     0. 
  -2  -8   2      0.01    0.16  0. 1.0000     0. 
  -2   8   2      0.22    0.12  0. 1.0000     0. 
  -2   8   2      0.34    0.13  0. 1.0000     0. 
  -1  -8   2     23.97    1.11  0. 1.0000     0. 
   1  -8  -2     22.65    1.09  0. 1.0000     0. 
  -1   8   2     22.81    0.97  0. 1.0000     0. 
   1   8  -2     24.33    0.94  0. 1.0000     0. 
  -1   8   2     23.75    0.99  0. 1.0000     0. 
   0  -8  -2     16.05    0.84  0. 1.0000     0. 
   0  -8   2     17.25    0.87  0. 1.0000     0. 
   0   8  -2     16.67    0.73  0. 1.0000     0. 
   0   8   2     17.05    0.68  0. 1.0000     0. 
   0   8   2     15.30    0.71  0. 1.0000     0. 
   0   8   2     16.47    0.68  0. 1.0000     0. 
   1  -8   2     10.35    0.64  0. 1.0000     0. 
  -1  -8  -2     10.17    0.61  0. 1.0000     0. 
   1   8   2      9.52    0.52  0. 1.0000     0. 
  -1   8  -2      9.61    0.52  0. 1.0000     0. 
  -2  -8  -2      1.61    0.26  0. 1.0000     0. 
   2  -8   2      1.71    0.29  0. 1.0000     0. 
   3  -8   2      2.69    0.36  0. 1.0000     0. 
   4  -8   2     22.56    1.03  0. 1.0000     0. 
   5  -8   2     17.14    0.88  0. 1.0000     0. 
   5  -8   2     17.99    0.51  0. 1.0000     0. 
   6  -8   2      1.40    0.14  0. 1.0000     0. 
   6  -8   2      1.58    0.17  0. 1.0000     0. 
   6  -8   2      1.38    0.08  0. 1.0000     0. 
   6  -8   2      1.34    0.30  0. 1.0000     0. 
   6   8   2      1.20    0.11  0. 1.0000     0. 
   7  -8   2      1.68    0.33  0. 1.0000     0. 
   7  -8   2      2.74    0.22  0. 1.0000     0. 
   7  -8   2      2.58    0.19  0. 1.0000     0. 
   7   8   2      1.86    0.13  0. 1.0000     0. 
   8  -8   2      4.82    0.25  0. 1.0000     0. 
   8  -8   2      4.92    0.23  0. 1.0000     0. 
   8  -8   2      5.08    0.29  0. 1.0000     0. 
   8   8   2      4.64    0.20  0. 1.0000     0. 
   9  -8   2      6.06    0.26  0. 1.0000     0. 
   9  -8   2      6.44    0.23  0. 1.0000     0. 
   9  -8   2      5.67    0.24  0. 1.0000     0. 
   9  -8   2      5.89    0.23  0. 1.0000     0. 
   9  -8   2      6.66    0.31  0. 1.0000     0. 
  -9   8  -2      5.28    0.44  0. 1.0000     0. 
   9   8   2      5.90    0.17  0. 1.0000     0. 
   9   8   2      5.75    0.22  0. 1.0000     0. 
  10  -8   2      5.39    0.26  0. 1.0000     0. 
  10  -9  -2      3.31    0.18  0. 1.0000     0. 
   9  -9  -2      5.35    0.24  0. 1.0000     0. 
   9  -9  -2      5.25    0.27  0. 1.0000     0. 
   9  -9  -2      5.08    0.22  0. 1.0000     0. 
   9   9  -2      5.46    0.20  0. 1.0000     0. 
   8  -9  -2      6.77    0.30  0. 1.0000     0. 
   8  -9  -2      7.09    0.34  0. 1.0000     0. 
   8   9  -2      6.71    0.26  0. 1.0000     0. 
   7  -9  -2      6.04    0.30  0. 1.0000     0. 
   7  -9  -2      5.49    0.51  0. 1.0000     0. 
   7  -9  -2      6.33    0.32  0. 1.0000     0. 
   7  -9  -2      6.13    0.30  0. 1.0000     0. 
   7   9  -2      6.54    0.25  0. 1.0000     0. 
   6  -9  -2      8.88    0.29  0. 1.0000     0. 
   6  -9  -2      9.38    0.63  0. 1.0000     0. 
   6  -9  -2      9.33    0.40  0. 1.0000     0. 
   6  -9  -2      8.87    0.38  0. 1.0000     0. 
   6   9  -2      9.13    0.33  0. 1.0000     0. 
   5  -9  -2     28.33    1.26  0. 1.0000     0. 
   5  -9  -2     28.02    0.96  0. 1.0000     0. 
   5   9  -2     28.93    0.89  0. 1.0000     0. 
  -5   9   2     30.10    1.30  0. 1.0000     0. 
   4  -9  -2     29.70    1.33  0. 1.0000     0. 
  -4   9   2     31.66    1.37  0. 1.0000     0. 
   4   9  -2     31.96    1.08  0. 1.0000     0. 
   4   9  -2     33.71    1.09  0. 1.0000     0. 
   3  -9  -2     -0.10    0.19  0. 1.0000     0. 
  -3   9   2      0.25    0.14  0. 1.0000     0. 
   2  -9  -2     52.88    2.23  0. 1.0000     0. 
  -2  -9   2     52.75    2.21  0. 1.0000     0. 
  -2   9   2     58.40    2.17  0. 1.0000     0. 
  -2   9   2     51.91    2.07  0. 1.0000     0. 
  -1  -9   2     27.31    1.29  0. 1.0000     0. 
   1  -9  -2     27.12    1.28  0. 1.0000     0. 
  -1   9   2     29.14    1.14  0. 1.0000     0. 
  -1   9   2     25.78    1.12  0. 1.0000     0. 
   0  -9  -2     14.15    0.84  0. 1.0000     0. 
   0  -9   2     15.02    0.85  0. 1.0000     0. 
   0   9  -2     16.12    0.70  0. 1.0000     0. 
  -1  -9  -2     43.30    1.84  0. 1.0000     0. 
   1  -9   2     42.75    1.86  0. 1.0000     0. 
  -1   9  -2     44.35    1.76  0. 1.0000     0. 
  -2  -9  -2     -0.19    0.16  0. 1.0000     0. 
   2  -9   2     -0.08    0.17  0. 1.0000     0. 
   3  -9   2      7.48    0.61  0. 1.0000     0. 
   4  -9   2      0.46    0.22  0. 1.0000     0. 
   5  -9   2      0.51    0.23  0. 1.0000     0. 
   5  -9   2      0.22    0.06  0. 1.0000     0. 
   5   9   2     -0.01    0.05  0. 1.0000     0. 
   6  -9   2      3.25    0.21  0. 1.0000     0. 
   6  -9   2      3.46    0.45  0. 1.0000     0. 
   6  -9   2      3.50    0.24  0. 1.0000     0. 
   6  -9   2      3.29    0.13  0. 1.0000     0. 
   6   9   2      2.87    0.16  0. 1.0000     0. 
   7  -9   2      3.00    0.41  0. 1.0000     0. 
   7  -9   2      3.07    0.23  0. 1.0000     0. 
   7  -9   2      2.85    0.21  0. 1.0000     0. 
   7   9   2      2.76    0.15  0. 1.0000     0. 
   8  -9   2     11.81    0.49  0. 1.0000     0. 
   8  -9   2     11.96    0.46  0. 1.0000     0. 
   8   9   2     12.55    0.40  0. 1.0000     0. 
   8   9   2     12.45    0.32  0. 1.0000     0. 
   9  -9   2      7.15    0.27  0. 1.0000     0. 
   9  -9   2      6.50    0.24  0. 1.0000     0. 
   9  -9   2      6.79    0.31  0. 1.0000     0. 
   9  -9   2      6.73    0.24  0. 1.0000     0. 
   9   9   2      6.52    0.17  0. 1.0000     0. 
   9 -10  -2      5.81    0.27  0. 1.0000     0. 
   9 -10  -2      5.94    0.24  0. 1.0000     0. 
   9  10  -2      5.84    0.20  0. 1.0000     0. 
   8 -10  -2     12.70    0.47  0. 1.0000     0. 
   8 -10  -2     12.71    0.51  0. 1.0000     0. 
   8  10  -2     13.46    0.43  0. 1.0000     0. 
   7 -10  -2      0.01    0.11  0. 1.0000     0. 
   7 -10  -2      0.06    0.09  0. 1.0000     0. 
   7 -10  -2      0.13    0.09  0. 1.0000     0. 
   7  10  -2     -0.05    0.05  0. 1.0000     0. 
   6 -10  -2     25.63    0.88  0. 1.0000     0. 
   6 -10  -2     24.84    0.73  0. 1.0000     0. 
   6 -10  -2     26.68    0.92  0. 1.0000     0. 
   6 -10  -2     25.04    1.19  0. 1.0000     0. 
   6  10  -2     25.86    0.81  0. 1.0000     0. 
  -6  10   2     27.10    1.22  0. 1.0000     0. 
   5 -10  -2     19.02    0.68  0. 1.0000     0. 
   5 -10  -2     19.38    0.96  0. 1.0000     0. 
   5 -10  -2     17.63    0.65  0. 1.0000     0. 
  -5  10   2     19.25    0.95  0. 1.0000     0. 
   5  10  -2     17.93    0.60  0. 1.0000     0. 
   4 -10  -2     30.12    1.38  0. 1.0000     0. 
   4  10  -2     32.01    1.09  0. 1.0000     0. 
   4  10  -2     34.75    1.10  0. 1.0000     0. 
  -4  10   2     32.78    1.41  0. 1.0000     0. 
   4  10  -2     31.95    1.00  0. 1.0000     0. 
   3  10  -2      4.13    0.18  0. 1.0000     0. 
  -3  10   2      3.97    0.37  0. 1.0000     0. 
  -3  10   2      3.60    0.15  0. 1.0000     0. 
  -2  10   2      6.00    0.19  0. 1.0000     0. 
  -1 -10   2     23.57    1.26  0. 1.0000     0. 
  -1  10   2     26.70    0.71  0. 1.0000     0. 
  -1  10   2     27.05    1.08  0. 1.0000     0. 
   0 -10  -2     14.68    0.90  0. 1.0000     0. 
   0 -10   2     14.95    0.92  0. 1.0000     0. 
   0  10  -2     16.28    0.44  0. 1.0000     0. 
   0  10  -2     16.45    0.71  0. 1.0000     0. 
  -1  10  -2      3.51    0.30  0. 1.0000     0. 
  -2 -10  -2     25.56    1.37  0. 1.0000     0. 
   2  10   2     26.87    0.91  0. 1.0000     0. 
   4 -10   2     54.34    2.09  0. 1.0000     0. 
   4  10   2     51.98    1.59  0. 1.0000     0. 
   5 -10   2      2.85    0.15  0. 1.0000     0. 
   5 -10   2      2.84    0.41  0. 1.0000     0. 
   5 -10   2      2.98    0.21  0. 1.0000     0. 
   5  10   2      3.03    0.15  0. 1.0000     0. 
   6 -10   2      0.27    0.21  0. 1.0000     0. 
   6 -10   2      0.35    0.11  0. 1.0000     0. 
   6  10   2      0.12    0.06  0. 1.0000     0. 
   7  10   2      0.27    0.06  0. 1.0000     0. 
   8 -10   2      0.17    0.10  0. 1.0000     0. 
   8 -10   2      0.22    0.08  0. 1.0000     0. 
   8  10   2      0.09    0.03  0. 1.0000     0. 
   8  10   2      0.03    0.04  0. 1.0000     0. 
   8  10   2      0.10    0.03  0. 1.0000     0. 
   9 -10   2      2.60    0.19  0. 1.0000     0. 
   9 -10   2      2.48    0.15  0. 1.0000     0. 
   9 -11  -2     14.33    0.49  0. 1.0000     0. 
   9 -11  -2     14.80    0.52  0. 1.0000     0. 
   8 -11  -2      2.20    0.16  0. 1.0000     0. 
   8 -11  -2      2.17    0.18  0. 1.0000     0. 
   8  11  -2      2.48    0.12  0. 1.0000     0. 
   7 -11  -2      4.13    0.23  0. 1.0000     0. 
   7 -11  -2      3.92    0.24  0. 1.0000     0. 
   7 -11  -2      3.75    0.22  0. 1.0000     0. 
   7  11  -2      3.72    0.17  0. 1.0000     0. 
   6 -11  -2      9.22    0.39  0. 1.0000     0. 
   6 -11  -2      8.90    0.37  0. 1.0000     0. 
   6 -11  -2      9.01    0.29  0. 1.0000     0. 
   6  11  -2      8.55    0.32  0. 1.0000     0. 
   5 -11  -2     26.62    1.21  0. 1.0000     0. 
   5 -11  -2     25.45    0.91  0. 1.0000     0. 
   5  11  -2     25.90    0.81  0. 1.0000     0. 
   4 -11  -2     14.70    0.81  0. 1.0000     0. 
  -4  11   2     14.24    0.43  0. 1.0000     0. 
   4  11  -2     14.75    0.48  0. 1.0000     0. 
  -4  11   2     13.98    0.53  0. 1.0000     0. 
   3 -11  -2      4.46    0.45  0. 1.0000     0. 
  -3  11   2      5.33    0.25  0. 1.0000     0. 
   3  11  -2      4.91    0.22  0. 1.0000     0. 
  -3  11   2      5.21    0.18  0. 1.0000     0. 
   3  11  -2      5.47    0.22  0. 1.0000     0. 
   3  11  -2      5.54    0.22  0. 1.0000     0. 
  -2  11   2      0.36    0.05  0. 1.0000     0. 
   2  11  -2      0.42    0.08  0. 1.0000     0. 
  -1  11  -2     29.68    0.80  0. 1.0000     0. 
   1  11   2     29.29    1.02  0. 1.0000     0. 
   2  11   2      3.12    0.15  0. 1.0000     0. 
  -2  11  -2      3.57    0.14  0. 1.0000     0. 
   3  11   2     17.69    0.58  0. 1.0000     0. 
  -3  11  -2     18.86    0.64  0. 1.0000     0. 
   4 -11   2     20.04    0.99  0. 1.0000     0. 
   4  11   2     18.42    0.60  0. 1.0000     0. 
   5 -11   2      2.34    0.38  0. 1.0000     0. 
   5 -11   2      2.63    0.14  0. 1.0000     0. 
   5 -11   2      3.02    0.22  0. 1.0000     0. 
   5 -11   2      2.73    0.20  0. 1.0000     0. 
   5  11   2      2.22    0.14  0. 1.0000     0. 
   6 -11   2      1.62    0.09  0. 1.0000     0. 
   6 -11   2      2.05    0.20  0. 1.0000     0. 
   6 -11   2      1.86    0.18  0. 1.0000     0. 
   6  11   2      1.74    0.11  0. 1.0000     0. 
   7 -11   2      0.25    0.11  0. 1.0000     0. 
   7 -11   2      0.16    0.09  0. 1.0000     0. 
   7  11   2      0.22    0.05  0. 1.0000     0. 
   8 -11   2      5.31    0.26  0. 1.0000     0. 
   8 -11   2      5.62    0.24  0. 1.0000     0. 
   8  11   2      4.69    0.13  0. 1.0000     0. 
   8  11   2      4.81    0.13  0. 1.0000     0. 
   8  11   2      4.54    0.17  0. 1.0000     0. 
   9 -11   2      2.59    0.17  0. 1.0000     0. 
   8 -12  -2      6.57    0.26  0. 1.0000     0. 
   8 -12  -2      6.30    0.28  0. 1.0000     0. 
   8  12  -2      6.75    0.22  0. 1.0000     0. 
   7 -12  -2      0.62    0.11  0. 1.0000     0. 
   7 -12  -2      0.50    0.10  0. 1.0000     0. 
   7 -12  -2      0.51    0.11  0. 1.0000     0. 
   7  12  -2      0.32    0.06  0. 1.0000     0. 
   6 -12  -2      1.49    0.16  0. 1.0000     0. 
   6 -12  -2      1.20    0.14  0. 1.0000     0. 
   6 -12  -2      1.32    0.10  0. 1.0000     0. 
  -6  12   2      1.14    0.09  0. 1.0000     0. 
   6  12  -2      1.13    0.10  0. 1.0000     0. 
  -5  12   2      2.39    0.19  0. 1.0000     0. 
  -5  12   2      2.38    0.12  0. 1.0000     0. 
   5  12  -2      2.39    0.14  0. 1.0000     0. 
   4 -12  -2      1.11    0.29  0. 1.0000     0. 
  -4  12   2      1.47    0.15  0. 1.0000     0. 
  -4  12   2      1.35    0.09  0. 1.0000     0. 
   4  12  -2      1.98    0.13  0. 1.0000     0. 
   3 -12  -2      5.42    0.48  0. 1.0000     0. 
   3  12  -2      4.38    0.18  0. 1.0000     0. 
   3  12  -2      4.80    0.18  0. 1.0000     0. 
   3  12  -2      4.59    0.21  0. 1.0000     0. 
  -3  12   2      4.60    0.16  0. 1.0000     0. 
   3  12  -2      4.51    0.20  0. 1.0000     0. 
  -3  12   2      4.53    0.24  0. 1.0000     0. 
   2  12  -2      8.25    0.32  0. 1.0000     0. 
   2  12  -2      8.23    0.33  0. 1.0000     0. 
  -2  12   2      8.30    0.34  0. 1.0000     0. 
   2  12  -2      8.72    0.31  0. 1.0000     0. 
  -1  12   2     31.54    1.00  0. 1.0000     0. 
   1  12  -2     29.68    0.99  0. 1.0000     0. 
  -1  12   2     30.09    0.95  0. 1.0000     0. 
   0  12  -2      0.97    0.10  0. 1.0000     0. 
   0  12  -2      0.84    0.11  0. 1.0000     0. 
   0  12   2      0.80    0.09  0. 1.0000     0. 
   0  12   2      0.90    0.11  0. 1.0000     0. 
  -1  12  -2     17.18    0.61  0. 1.0000     0. 
   1  12   2     16.70    0.59  0. 1.0000     0. 
   1  12   2     17.67    0.62  0. 1.0000     0. 
   1  12   2     17.38    0.57  0. 1.0000     0. 
  -1  12  -2     17.80    0.48  0. 1.0000     0. 
   2  12   2     16.13    0.56  0. 1.0000     0. 
   2  12   2     15.64    0.54  0. 1.0000     0. 
  -2  12  -2     16.09    0.46  0. 1.0000     0. 
   2  12   2     16.49    0.53  0. 1.0000     0. 
   2  12   2     15.81    0.55  0. 1.0000     0. 
  -2  12  -2     15.90    0.58  0. 1.0000     0. 
   3 -12   2     14.73    0.81  0. 1.0000     0. 
   3  12   2     13.91    0.47  0. 1.0000     0. 
  -3  12  -2     14.33    0.41  0. 1.0000     0. 
  -3  12  -2     13.73    0.52  0. 1.0000     0. 
   4 -12   2     16.71    0.92  0. 1.0000     0. 
   4  12   2     17.41    0.55  0. 1.0000     0. 
  -4  12  -2     17.19    0.61  0. 1.0000     0. 
  -4  12  -2     16.57    0.49  0. 1.0000     0. 
   5 -12   2      4.06    0.17  0. 1.0000     0. 
   5 -12   2      4.49    0.26  0. 1.0000     0. 
   5 -12   2      4.75    0.25  0. 1.0000     0. 
   5  12   2      3.65    0.18  0. 1.0000     0. 
   6 -12   2      2.39    0.20  0. 1.0000     0. 
   6 -12   2      2.01    0.19  0. 1.0000     0. 
   6  12   2      2.04    0.12  0. 1.0000     0. 
   7 -12   2      2.95    0.20  0. 1.0000     0. 
   7 -12   2      3.00    0.19  0. 1.0000     0. 
   7 -12   2      2.78    0.18  0. 1.0000     0. 
   7  12   2      2.73    0.13  0. 1.0000     0. 
   7  12   2      2.75    0.10  0. 1.0000     0. 
   8 -12   2      0.80    0.11  0. 1.0000     0. 
   7 -13  -2      0.40    0.10  0. 1.0000     0. 
   7 -13  -2      0.38    0.08  0. 1.0000     0. 
   6 -13  -2      0.03    0.08  0. 1.0000     0. 
   6 -13  -2      0.08    0.04  0. 1.0000     0. 
   6 -13  -2     -0.04    0.08  0. 1.0000     0. 
  -6  13   2      0.12    0.04  0. 1.0000     0. 
  -6  13   2      0.12    0.08  0. 1.0000     0. 
   6  13  -2      0.16    0.05  0. 1.0000     0. 
  -5  13   2      0.66    0.10  0. 1.0000     0. 
   5  13  -2      0.37    0.06  0. 1.0000     0. 
  -4  13   2      8.14    0.25  0. 1.0000     0. 
  -4  13   2      8.77    0.36  0. 1.0000     0. 
   4  13  -2      8.99    0.31  0. 1.0000     0. 
   3 -13  -2     14.88    0.85  0. 1.0000     0. 
   3  13  -2     15.67    0.55  0. 1.0000     0. 
  -3  13   2     16.80    0.59  0. 1.0000     0. 
   3  13  -2     17.38    0.54  0. 1.0000     0. 
   2  13  -2      0.37    0.08  0. 1.0000     0. 
   2  13  -2      0.91    0.09  0. 1.0000     0. 
  -2  13   2      0.53    0.10  0. 1.0000     0. 
   2  13  -2      0.43    0.08  0. 1.0000     0. 
   1  13  -2      0.89    0.10  0. 1.0000     0. 
  -1  13   2      0.93    0.11  0. 1.0000     0. 
   1  13  -2      1.06    0.11  0. 1.0000     0. 
   1  13  -2      0.90    0.11  0. 1.0000     0. 
  -1  13   2      0.90    0.10  0. 1.0000     0. 
   0  13  -2      9.66    0.37  0. 1.0000     0. 
   0  13  -2      9.24    0.34  0. 1.0000     0. 
   0  13   2      9.08    0.36  0. 1.0000     0. 
   0  13   2      9.01    0.36  0. 1.0000     0. 
   0  13   2      9.09    0.34  0. 1.0000     0. 
  -1  13  -2      2.59    0.19  0. 1.0000     0. 
   1  13   2      2.54    0.16  0. 1.0000     0. 
   1  13   2      2.66    0.16  0. 1.0000     0. 
   1  13   2      2.98    0.15  0. 1.0000     0. 
  -2  13  -2      2.38    0.18  0. 1.0000     0. 
  -2  13  -2      2.53    0.08  0. 1.0000     0. 
   2  13   2      1.49    0.13  0. 1.0000     0. 
   2  13   2      1.72    0.13  0. 1.0000     0. 
   3 -13   2      7.40    0.55  0. 1.0000     0. 
   3  13   2      4.66    0.21  0. 1.0000     0. 
  -4  13  -2      1.78    0.10  0. 1.0000     0. 
  -4  13  -2      1.44    0.14  0. 1.0000     0. 
   4  13   2      2.06    0.13  0. 1.0000     0. 
   5 -13   2     10.16    0.41  0. 1.0000     0. 
   5 -13   2     10.09    0.40  0. 1.0000     0. 
   5 -13   2      9.90    0.31  0. 1.0000     0. 
  -5  13  -2      9.86    0.30  0. 1.0000     0. 
   5  13   2      9.25    0.33  0. 1.0000     0. 
   6 -13   2      2.61    0.19  0. 1.0000     0. 
   6 -13   2      2.74    0.19  0. 1.0000     0. 
  -6  13  -2      3.28    0.13  0. 1.0000     0. 
   6  13   2      3.26    0.14  0. 1.0000     0. 
   7 -13   2      2.00    0.16  0. 1.0000     0. 
   7 -13   2      1.75    0.15  0. 1.0000     0. 
   7 -13   2      1.61    0.14  0. 1.0000     0. 
   7  13   2      1.47    0.08  0. 1.0000     0. 
   6  14  -2      0.99    0.08  0. 1.0000     0. 
  -6  14   2      0.79    0.10  0. 1.0000     0. 
   5 -14  -2      0.21    0.06  0. 1.0000     0. 
   5  14  -2      0.23    0.06  0. 1.0000     0. 
  -5  14   2      0.31    0.08  0. 1.0000     0. 
  -4  14   2      4.48    0.23  0. 1.0000     0. 
   4  14  -2      4.73    0.20  0. 1.0000     0. 
  -3  14   2      2.19    0.18  0. 1.0000     0. 
   3  14  -2      2.13    0.14  0. 1.0000     0. 
   2  14  -2     15.02    0.52  0. 1.0000     0. 
   2  14  -2     15.39    0.52  0. 1.0000     0. 
   2  14  -2     15.10    0.51  0. 1.0000     0. 
  -2  14   2     15.18    0.54  0. 1.0000     0. 
   2  14  -2     14.99    0.52  0. 1.0000     0. 
   1  14  -2      8.82    0.34  0. 1.0000     0. 
   1  14  -2      8.76    0.34  0. 1.0000     0. 
  -1  14   2      8.73    0.35  0. 1.0000     0. 
   1  14  -2      8.82    0.32  0. 1.0000     0. 
  -1  14   2      8.19    0.32  0. 1.0000     0. 
   0  14  -2      1.22    0.12  0. 1.0000     0. 
   0  14   2      1.41    0.11  0. 1.0000     0. 
   0  14  -2      1.32    0.12  0. 1.0000     0. 
   0  14   2      1.31    0.13  0. 1.0000     0. 
   0  14   2      1.13    0.11  0. 1.0000     0. 
  -1  14  -2      0.68    0.10  0. 1.0000     0. 
   1  14   2      0.56    0.08  0. 1.0000     0. 
   1  14   2      0.46    0.08  0. 1.0000     0. 
   1  14   2      0.66    0.07  0. 1.0000     0. 
   1  14   2      0.63    0.07  0. 1.0000     0. 
  -2  14  -2      0.99    0.12  0. 1.0000     0. 
  -3  14  -2      0.28    0.09  0. 1.0000     0. 
   4  14   2     10.46    0.36  0. 1.0000     0. 
  -4  14  -2     10.68    0.41  0. 1.0000     0. 
   5 -14   2      1.89    0.09  0. 1.0000     0. 
  -5  14  -2      1.81    0.15  0. 1.0000     0. 
   5  14   2      1.22    0.10  0. 1.0000     0. 
   6 -14   2      3.00    0.18  0. 1.0000     0. 
   6 -14   2      2.86    0.18  0. 1.0000     0. 
   6 -14   2      3.18    0.18  0. 1.0000     0. 
   6  14   2      2.83    0.12  0. 1.0000     0. 
   6  15  -2      2.63    0.11  0. 1.0000     0. 
  -5  15   2      0.03    0.06  0. 1.0000     0. 
   5  15  -2      0.04    0.04  0. 1.0000     0. 
  -4  15   2      3.24    0.18  0. 1.0000     0. 
   4  15  -2      2.87    0.14  0. 1.0000     0. 
  -3  15   2     18.02    0.63  0. 1.0000     0. 
   3  15  -2     18.74    0.59  0. 1.0000     0. 
  -2  15   2      0.51    0.09  0. 1.0000     0. 
   2  15  -2      0.49    0.07  0. 1.0000     0. 
   2  15  -2      0.43    0.08  0. 1.0000     0. 
   1  15  -2      0.87    0.09  0. 1.0000     0. 
   1  15  -2      0.94    0.10  0. 1.0000     0. 
   1  15  -2      1.14    0.08  0. 1.0000     0. 
   1  15  -2      1.02    0.08  0. 1.0000     0. 
   0  15   2      0.09    0.07  0. 1.0000     0. 
   0  15   2     -0.03    0.06  0. 1.0000     0. 
   0  15  -2      0.26    0.06  0. 1.0000     0. 
   0  15   2      0.03    0.04  0. 1.0000     0. 
   0  15  -2      0.08    0.07  0. 1.0000     0. 
   0  15   2     -0.04    0.05  0. 1.0000     0. 
   0  15  -2      0.07    0.06  0. 1.0000     0. 
   1  15   2      1.16    0.11  0. 1.0000     0. 
   1  15   2      1.10    0.10  0. 1.0000     0. 
  -2  15  -2      0.71    0.10  0. 1.0000     0. 
   2  15   2      0.36    0.07  0. 1.0000     0. 
  -3  15  -2      2.57    0.17  0. 1.0000     0. 
   3  15   2      2.69    0.14  0. 1.0000     0. 
   4 -15   2      6.53    0.23  0. 1.0000     0. 
  -4  15  -2      7.13    0.29  0. 1.0000     0. 
   4  15   2      7.17    0.25  0. 1.0000     0. 
  -5  15  -2      6.41    0.26  0. 1.0000     0. 
   5  15   2      6.13    0.22  0. 1.0000     0. 
   5  16  -2      5.32    0.19  0. 1.0000     0. 
  -4  16   2      0.29    0.07  0. 1.0000     0. 
   4  16  -2      0.45    0.06  0. 1.0000     0. 
   3  16  -2      0.03    0.05  0. 1.0000     0. 
  -3  16   2      0.17    0.07  0. 1.0000     0. 
  -3  16   2      0.05    0.05  0. 1.0000     0. 
   2  16  -2      5.31    0.20  0. 1.0000     0. 
  -2  16   2      4.60    0.20  0. 1.0000     0. 
  -2  16   2      4.96    0.22  0. 1.0000     0. 
  -1  16   2      0.30    0.05  0. 1.0000     0. 
  -1  16   2      0.27    0.07  0. 1.0000     0. 
   1  16  -2      0.23    0.06  0. 1.0000     0. 
  -1  16   2      0.27    0.05  0. 1.0000     0. 
  -1  16   2      0.11    0.06  0. 1.0000     0. 
   1  16  -2      0.20    0.06  0. 1.0000     0. 
   0  16   2      0.06    0.06  0. 1.0000     0. 
   0  16  -2      0.23    0.04  0. 1.0000     0. 
   0  16  -2      0.18    0.06  0. 1.0000     0. 
   0  16  -2      0.31    0.05  0. 1.0000     0. 
   0  16  -2      0.17    0.07  0. 1.0000     0. 
   0  16   2      0.14    0.06  0. 1.0000     0. 
  -1  16  -2      7.76    0.31  0. 1.0000     0. 
   1  16   2      7.87    0.29  0. 1.0000     0. 
  -1  16  -2      7.97    0.31  0. 1.0000     0. 
   2  16   2      8.81    0.31  0. 1.0000     0. 
  -2  16  -2      8.50    0.33  0. 1.0000     0. 
  -3  16  -2      6.80    0.28  0. 1.0000     0. 
   3  16   2      7.28    0.26  0. 1.0000     0. 
   4  16   2      4.92    0.19  0. 1.0000     0. 
  -4  16  -2      5.24    0.22  0. 1.0000     0. 
  -3  17   2      4.79    0.20  0. 1.0000     0. 
   3  17  -2      5.01    0.18  0. 1.0000     0. 
  -2  17   2      0.07    0.05  0. 1.0000     0. 
   2  17  -2      0.12    0.05  0. 1.0000     0. 
   1  17  -2      1.99    0.11  0. 1.0000     0. 
  -1  17   2      1.96    0.11  0. 1.0000     0. 
   0  17  -2      0.12    0.05  0. 1.0000     0. 
   0  17   2      0.14    0.05  0. 1.0000     0. 
  -1  17  -2      0.46    0.07  0. 1.0000     0. 
   1  17   2      0.39    0.06  0. 1.0000     0. 
   2  17   2      1.61    0.10  0. 1.0000     0. 
  -2  17  -2      1.84    0.12  0. 1.0000     0. 
   3  17   2      5.40    0.19  0. 1.0000     0. 
  -3  17  -2      5.38    0.21  0. 1.0000     0. 
  11   0  -3     -0.07    0.05  0. 1.0000     0. 
  11   0  -3      0.00    0.05  0. 1.0000     0. 
 -10   0   3     -0.10    0.13  0. 1.0000     0. 
  10   0  -3      0.03    0.06  0. 1.0000     0. 
   9   0  -3      0.05    0.10  0. 1.0000     0. 
   9   0  -3      0.02    0.06  0. 1.0000     0. 
  -9   0   3     -0.08    0.14  0. 1.0000     0. 
  -8   0   3     -0.15    0.16  0. 1.0000     0. 
   8   0  -3      0.01    0.10  0. 1.0000     0. 
   8   0  -3      0.05    0.16  0. 1.0000     0. 
   8   0  -3      0.01    0.06  0. 1.0000     0. 
   8   0  -3     -0.17    0.06  0. 1.0000     0. 
   8   0  -3      0.02    0.06  0. 1.0000     0. 
  -8   0   3     -0.12    0.14  0. 1.0000     0. 
   7   0  -3     -0.01    0.05  0. 1.0000     0. 
  -7   0   3      0.01    0.12  0. 1.0000     0. 
   7   0  -3     -0.05    0.14  0. 1.0000     0. 
  -7   0   3     -0.02    0.16  0. 1.0000     0. 
  -6   0   3      0.02    0.11  0. 1.0000     0. 
   6   0  -3      0.19    0.13  0. 1.0000     0. 
  -6   0   3      0.09    0.15  0. 1.0000     0. 
  -5   0   3      0.01    0.13  0. 1.0000     0. 
   5   0  -3     -0.13    0.10  0. 1.0000     0. 
   4   0  -3      0.08    0.08  0. 1.0000     0. 
  -4   0   3      0.14    0.12  0. 1.0000     0. 
   4   0  -3     -0.09    0.07  0. 1.0000     0. 
   4   0  -3      0.01    0.11  0. 1.0000     0. 
   3   0  -3     -0.18    0.06  0. 1.0000     0. 
   3   0  -3     -0.14    0.04  0. 1.0000     0. 
  -3   0   3     -0.13    0.09  0. 1.0000     0. 
   3   0  -3     -0.12    0.07  0. 1.0000     0. 
  -3   0   3     -0.07    0.10  0. 1.0000     0. 
  -3   0   3     -0.20    0.08  0. 1.0000     0. 
  -2   0   3     -0.03    0.08  0. 1.0000     0. 
   2   0  -3      0.03    0.07  0. 1.0000     0. 
  -2   0   3      0.09    0.09  0. 1.0000     0. 
   2   0  -3     -0.09    0.07  0. 1.0000     0. 
   2   0  -3      0.05    0.08  0. 1.0000     0. 
  -1   0   3     -0.11    0.03  0. 1.0000     0. 
  -1   0   3     -0.11    0.04  0. 1.0000     0. 
   1   0  -3     -0.11    0.04  0. 1.0000     0. 
  -1   0   3     -0.12    0.04  0. 1.0000     0. 
   0   0  -3     -0.12    0.02  0. 1.0000     0. 
   0   0   3     -0.12    0.02  0. 1.0000     0. 
  -3   0  -3      1.12    0.14  0. 1.0000     0. 
  -4   0  -3      0.00    0.10  0. 1.0000     0. 
  -4   0  -3      0.01    0.08  0. 1.0000     0. 
   4   0   3     -0.04    0.09  0. 1.0000     0. 
  -5   0  -3      0.01    0.11  0. 1.0000     0. 
   5   0   3      0.13    0.11  0. 1.0000     0. 
   6   0   3     -0.15    0.11  0. 1.0000     0. 
   7   0   3      0.10    0.07  0. 1.0000     0. 
   7   0   3      0.08    0.14  0. 1.0000     0. 
   8   0   3      0.02    0.05  0. 1.0000     0. 
   8   0   3     -0.04    0.17  0. 1.0000     0. 
   8   0   3      0.04    0.07  0. 1.0000     0. 
  -9   0  -3     -0.01    0.14  0. 1.0000     0. 
   9   0   3      0.10    0.06  0. 1.0000     0. 
 -10   0  -3      0.11    0.14  0. 1.0000     0. 
  10   0   3     -0.06    0.05  0. 1.0000     0. 
  11   0   3      0.00    0.05  0. 1.0000     0. 
  11   0   3      0.00    0.05  0. 1.0000     0. 
  11  -1  -3     12.60    0.42  0. 1.0000     0. 
  11  -1  -3     13.25    0.42  0. 1.0000     0. 
  11   1  -3     12.93    0.42  0. 1.0000     0. 
 -10  -1   3      2.56    0.31  0. 1.0000     0. 
  10  -1  -3      2.58    0.15  0. 1.0000     0. 
 -10   1   3      2.16    0.29  0. 1.0000     0. 
  10   1  -3      2.35    0.14  0. 1.0000     0. 
  -9  -1   3      0.10    0.16  0. 1.0000     0. 
   9  -1  -3      0.19    0.07  0. 1.0000     0. 
   9  -1  -3      0.18    0.10  0. 1.0000     0. 
   9  -1  -3      0.17    0.07  0. 1.0000     0. 
   9   1  -3      0.10    0.07  0. 1.0000     0. 
  -9   1   3      0.11    0.18  0. 1.0000     0. 
   8  -1  -3      0.18    0.11  0. 1.0000     0. 
   8  -1  -3      0.25    0.08  0. 1.0000     0. 
  -8  -1   3      0.49    0.20  0. 1.0000     0. 
   8  -1  -3      0.21    0.20  0. 1.0000     0. 
   8  -1  -3      0.23    0.08  0. 1.0000     0. 
  -8  -1   3      0.06    0.20  0. 1.0000     0. 
   8  -1  -3      0.37    0.08  0. 1.0000     0. 
   8   1  -3      0.22    0.05  0. 1.0000     0. 
   8   1  -3      0.35    0.08  0. 1.0000     0. 
   8   1  -3      0.34    0.08  0. 1.0000     0. 
   8   1  -3      0.37    0.06  0. 1.0000     0. 
  -8   1   3      0.36    0.22  0. 1.0000     0. 
  -8   1   3      0.42    0.18  0. 1.0000     0. 
   8   1  -3      0.25    0.10  0. 1.0000     0. 
  -7  -1   3      2.93    0.38  0. 1.0000     0. 
   7  -1  -3      2.56    0.33  0. 1.0000     0. 
  -7  -1   3      2.76    0.32  0. 1.0000     0. 
   7   1  -3      2.75    0.14  0. 1.0000     0. 
   7   1  -3      2.78    0.34  0. 1.0000     0. 
  -7   1   3      2.25    0.30  0. 1.0000     0. 
  -7   1   3      2.53    0.34  0. 1.0000     0. 
   6  -1  -3     17.86    0.78  0. 1.0000     0. 
  -6  -1   3     16.90    0.81  0. 1.0000     0. 
  -6  -1   3     16.49    0.75  0. 1.0000     0. 
  -6   1   3     16.41    0.80  0. 1.0000     0. 
   6   1  -3     16.93    0.77  0. 1.0000     0. 
   5  -1  -3     10.03    0.45  0. 1.0000     0. 
   5  -1  -3      9.55    0.49  0. 1.0000     0. 
  -5  -1   3      9.43    0.52  0. 1.0000     0. 
   5  -1  -3     10.19    0.46  0. 1.0000     0. 
  -5   1   3      9.70    0.53  0. 1.0000     0. 
   5   1  -3      9.52    0.49  0. 1.0000     0. 
   4  -1  -3      7.70    0.39  0. 1.0000     0. 
  -4  -1   3      9.19    0.44  0. 1.0000     0. 
   4  -1  -3      8.06    0.40  0. 1.0000     0. 
   4   1  -3      8.13    0.35  0. 1.0000     0. 
   4   1  -3      7.50    0.35  0. 1.0000     0. 
  -4   1   3      8.78    0.44  0. 1.0000     0. 
   4   1  -3      7.86    0.40  0. 1.0000     0. 
  -3  -1   3     11.08    0.56  0. 1.0000     0. 
   3  -1  -3     10.44    0.49  0. 1.0000     0. 
  -3  -1   3     11.66    0.57  0. 1.0000     0. 
   3  -1  -3     11.52    0.45  0. 1.0000     0. 
  -3   1   3     11.87    0.50  0. 1.0000     0. 
   3   1  -3     11.59    0.47  0. 1.0000     0. 
   3   1  -3     10.10    0.46  0. 1.0000     0. 
  -3   1   3     10.16    0.56  0. 1.0000     0. 
  -2  -1   3    150.40    6.18  0. 1.0000     0. 
   2  -1  -3    144.34    6.18  0. 1.0000     0. 
   2  -1  -3    154.46    5.19  0. 1.0000     0. 
  -2  -1   3    155.16    5.85  0. 1.0000     0. 
   2  -1  -3    140.43    5.43  0. 1.0000     0. 
   2   1  -3    146.07    5.41  0. 1.0000     0. 
  -2   1   3    145.23    5.43  0. 1.0000     0. 
   2   1  -3    144.23    5.42  0. 1.0000     0. 
  -1  -1   3     36.21    1.46  0. 1.0000     0. 
  -1  -1   3     31.67    1.53  0. 1.0000     0. 
  -1  -1   3     39.04    1.30  0. 1.0000     0. 
   1  -1  -3     37.01    1.54  0. 1.0000     0. 
   1   1  -3     36.05    1.35  0. 1.0000     0. 
   1   1  -3     34.95    1.35  0. 1.0000     0. 
   1   1  -3     35.96    1.46  0. 1.0000     0. 
  -1   1   3     34.94    1.35  0. 1.0000     0. 
   1   1  -3     37.05    1.53  0. 1.0000     0. 
  -1   1   3     36.75    1.54  0. 1.0000     0. 
   0  -1   3     63.18    2.20  0. 1.0000     0. 
   0  -1  -3     59.13    2.43  0. 1.0000     0. 
   0  -1   3     62.44    2.45  0. 1.0000     0. 
   0   1   3     63.32    2.26  0. 1.0000     0. 
   0   1   3     61.00    2.43  0. 1.0000     0. 
   0   1  -3     61.74    2.45  0. 1.0000     0. 
   1  -1   3      1.57    0.11  0. 1.0000     0. 
   1  -1   3      1.63    0.13  0. 1.0000     0. 
  -1  -1  -3      1.44    0.11  0. 1.0000     0. 
  -1   1  -3      1.61    0.13  0. 1.0000     0. 
  -2  -1  -3     23.47    1.00  0. 1.0000     0. 
  -2  -1  -3     24.37    0.86  0. 1.0000     0. 
   2  -1   3     23.60    0.88  0. 1.0000     0. 
   2  -1   3     23.04    0.89  0. 1.0000     0. 
  -3  -1  -3     24.02    1.02  0. 1.0000     0. 
  -3   1  -3     22.77    0.85  0. 1.0000     0. 
  -3   1  -3     22.43    1.03  0. 1.0000     0. 
   4  -1   3     16.31    0.69  0. 1.0000     0. 
  -4  -1  -3     17.66    0.70  0. 1.0000     0. 
  -4  -1  -3     16.83    0.76  0. 1.0000     0. 
  -4   1  -3     16.44    0.68  0. 1.0000     0. 
   4   1   3     16.14    0.68  0. 1.0000     0. 
   5  -1   3      6.62    0.38  0. 1.0000     0. 
  -5  -1  -3      6.46    0.39  0. 1.0000     0. 
  -5   1  -3      6.51    0.39  0. 1.0000     0. 
   5   1   3      6.27    0.38  0. 1.0000     0. 
   6  -1   3      6.46    0.41  0. 1.0000     0. 
   6   1   3      6.27    0.40  0. 1.0000     0. 
   6   1   3      6.04    0.39  0. 1.0000     0. 
   7  -1   3      0.23    0.16  0. 1.0000     0. 
   7  -1   3      0.66    0.06  0. 1.0000     0. 
   7  -1   3      0.48    0.05  0. 1.0000     0. 
   7  -1   3      0.69    0.09  0. 1.0000     0. 
   7   1   3      0.54    0.19  0. 1.0000     0. 
   7   1   3      0.70    0.10  0. 1.0000     0. 
  -8  -1  -3      1.17    0.24  0. 1.0000     0. 
   8  -1   3      1.13    0.10  0. 1.0000     0. 
   8  -1   3      0.95    0.11  0. 1.0000     0. 
   8  -1   3      1.16    0.27  0. 1.0000     0. 
   8   1   3      0.97    0.09  0. 1.0000     0. 
   8   1   3      1.16    0.12  0. 1.0000     0. 
   9  -1   3      0.20    0.19  0. 1.0000     0. 
   9  -1   3      0.07    0.06  0. 1.0000     0. 
  -9  -1  -3     -0.02    0.14  0. 1.0000     0. 
   9   1   3      0.39    0.07  0. 1.0000     0. 
  -9   1  -3      0.24    0.17  0. 1.0000     0. 
  10  -1   3      0.06    0.06  0. 1.0000     0. 
  10   1   3      0.20    0.06  0. 1.0000     0. 
 -10   1  -3     -0.05    0.15  0. 1.0000     0. 
  11  -1   3      2.76    0.14  0. 1.0000     0. 
  11   1   3      2.82    0.13  0. 1.0000     0. 
  11   1   3      2.97    0.13  0. 1.0000     0. 
  11  -2  -3      0.00    0.05  0. 1.0000     0. 
  11  -2  -3     -0.02    0.05  0. 1.0000     0. 
  11   2  -3      0.05    0.05  0. 1.0000     0. 
  10  -2  -3      2.04    0.18  0. 1.0000     0. 
  10  -2  -3      2.09    0.14  0. 1.0000     0. 
  10   2  -3      2.19    0.13  0. 1.0000     0. 
  10   2  -3      2.15    0.14  0. 1.0000     0. 
 -10   2   3      2.21    0.29  0. 1.0000     0. 
  -9  -2   3      0.34    0.17  0. 1.0000     0. 
   9  -2  -3      0.70    0.13  0. 1.0000     0. 
   9  -2  -3      0.50    0.09  0. 1.0000     0. 
   9  -2  -3      0.47    0.05  0. 1.0000     0. 
   9  -2  -3      0.50    0.06  0. 1.0000     0. 
   9  -2  -3      0.55    0.09  0. 1.0000     0. 
   9  -2  -3      0.63    0.23  0. 1.0000     0. 
   9   2  -3      0.42    0.08  0. 1.0000     0. 
  -9   2   3      0.41    0.20  0. 1.0000     0. 
   8  -2  -3     24.67    0.90  0. 1.0000     0. 
  -8  -2   3     21.66    1.16  0. 1.0000     0. 
   8  -2  -3     24.92    0.83  0. 1.0000     0. 
  -8  -2   3     25.08    1.09  0. 1.0000     0. 
   8  -2  -3     26.35    0.90  0. 1.0000     0. 
   8  -2  -3     25.06    0.80  0. 1.0000     0. 
   8  -2  -3     24.99    1.13  0. 1.0000     0. 
   8   2  -3     26.13    0.80  0. 1.0000     0. 
  -8   2   3     25.44    1.12  0. 1.0000     0. 
  -8   2   3     26.42    1.20  0. 1.0000     0. 
   7  -2  -3      1.73    0.28  0. 1.0000     0. 
  -7  -2   3      1.50    0.29  0. 1.0000     0. 
  -7  -2   3      1.82    0.27  0. 1.0000     0. 
   7   2  -3      1.47    0.10  0. 1.0000     0. 
  -7   2   3      1.61    0.30  0. 1.0000     0. 
  -6  -2   3      9.48    0.51  0. 1.0000     0. 
  -6  -2   3      9.90    0.58  0. 1.0000     0. 
   6  -2  -3     10.37    0.55  0. 1.0000     0. 
  -6   2   3     10.03    0.58  0. 1.0000     0. 
   5  -2  -3      5.49    0.30  0. 1.0000     0. 
   5  -2  -3      4.43    0.32  0. 1.0000     0. 
  -5  -2   3      4.15    0.34  0. 1.0000     0. 
  -5   2   3      5.01    0.37  0. 1.0000     0. 
   5   2  -3      5.49    0.34  0. 1.0000     0. 
   4  -2  -3     74.40    2.66  0. 1.0000     0. 
   4   2  -3     77.10    2.66  0. 1.0000     0. 
  -4   2   3     80.32    2.72  0. 1.0000     0. 
  -3  -2   3     20.97    1.02  0. 1.0000     0. 
  -3  -2   3     22.40    1.01  0. 1.0000     0. 
   3  -2  -3     22.89    0.87  0. 1.0000     0. 
   3   2  -3     22.40    0.86  0. 1.0000     0. 
  -3   2   3     23.50    0.87  0. 1.0000     0. 
   3   2  -3     22.24    0.87  0. 1.0000     0. 
   2  -2  -3     16.79    0.81  0. 1.0000     0. 
  -2  -2   3     17.93    0.68  0. 1.0000     0. 
  -2  -2   3     18.11    0.79  0. 1.0000     0. 
   2  -2  -3     17.29    0.69  0. 1.0000     0. 
  -2  -2   3     17.00    0.80  0. 1.0000     0. 
   2   2  -3     16.51    0.69  0. 1.0000     0. 
  -2   2   3     17.28    0.82  0. 1.0000     0. 
  -2   2   3     17.82    0.68  0. 1.0000     0. 
  -2   2   3     16.97    0.72  0. 1.0000     0. 
   2   2  -3     17.46    0.69  0. 1.0000     0. 
   2   2  -3     16.86    0.78  0. 1.0000     0. 
  -1  -2   3    274.67   10.60  0. 1.0000     0. 
  -1  -2   3    283.44    9.46  0. 1.0000     0. 
   1  -2  -3    275.43    9.45  0. 1.0000     0. 
   1  -2  -3    269.25   11.24  0. 1.0000     0. 
   1   2  -3    266.18    9.86  0. 1.0000     0. 
  -1   2   3    268.45   10.59  0. 1.0000     0. 
   1   2  -3    261.77    9.86  0. 1.0000     0. 
   1   2  -3    259.79   10.60  0. 1.0000     0. 
   1   2  -3    266.21   11.23  0. 1.0000     0. 
  -1   2   3    274.77   11.24  0. 1.0000     0. 
   0  -2  -3      4.38    0.23  0. 1.0000     0. 
   0  -2  -3      4.78    0.23  0. 1.0000     0. 
   0  -2   3      4.58    0.25  0. 1.0000     0. 
   0  -2  -3      4.47    0.22  0. 1.0000     0. 
   0   2  -3      4.55    0.22  0. 1.0000     0. 
   0   2  -3      4.55    0.25  0. 1.0000     0. 
   0   2   3      4.39    0.19  0. 1.0000     0. 
   0   2   3      4.36    0.23  0. 1.0000     0. 
   1  -2   3     41.04    1.42  0. 1.0000     0. 
  -1  -2  -3     39.48    1.39  0. 1.0000     0. 
   1  -2   3     41.22    1.57  0. 1.0000     0. 
  -1  -2  -3     37.90    1.54  0. 1.0000     0. 
   1  -2   3     36.87    1.45  0. 1.0000     0. 
   1   2   3     35.96    1.54  0. 1.0000     0. 
   1   2   3     38.55    1.34  0. 1.0000     0. 
  -1   2  -3     37.08    1.65  0. 1.0000     0. 
  -1   2  -3     37.73    1.56  0. 1.0000     0. 
   2  -2   3    240.90    8.21  0. 1.0000     0. 
  -2  -2  -3    239.68    9.20  0. 1.0000     0. 
   2  -2   3    226.06    8.55  0. 1.0000     0. 
  -2  -2  -3    241.91    8.19  0. 1.0000     0. 
  -2   2  -3    226.07    9.21  0. 1.0000     0. 
  -2   2  -3    228.04    9.76  0. 1.0000     0. 
   3  -2   3     49.58    1.94  0. 1.0000     0. 
  -3  -2  -3     54.78    2.14  0. 1.0000     0. 
   3  -2   3     52.85    1.88  0. 1.0000     0. 
  -3   2  -3     49.67    2.24  0. 1.0000     0. 
  -3   2  -3     52.39    1.81  0. 1.0000     0. 
   4  -2   3      7.20    0.39  0. 1.0000     0. 
  -4   2  -3      7.86    0.40  0. 1.0000     0. 
   4   2   3      7.55    0.38  0. 1.0000     0. 
   5  -2   3     36.76    1.33  0. 1.0000     0. 
  -5  -2  -3     33.36    1.32  0. 1.0000     0. 
  -5   2  -3     33.80    1.32  0. 1.0000     0. 
   5   2   3     34.20    1.31  0. 1.0000     0. 
   5   2   3     34.18    1.30  0. 1.0000     0. 
   6  -2   3      7.87    0.48  0. 1.0000     0. 
   6   2   3      8.44    0.49  0. 1.0000     0. 
   6   2   3      8.36    0.48  0. 1.0000     0. 
   7  -2   3      7.17    0.28  0. 1.0000     0. 
   7  -2   3      7.39    0.50  0. 1.0000     0. 
   7   2   3      6.73    0.48  0. 1.0000     0. 
   7   2   3      7.19    0.28  0. 1.0000     0. 
   8  -2   3      8.75    0.32  0. 1.0000     0. 
   8  -2   3      7.97    0.31  0. 1.0000     0. 
   8  -2   3      9.14    0.57  0. 1.0000     0. 
   8  -2   3      8.08    0.37  0. 1.0000     0. 
   8   2   3      8.56    0.33  0. 1.0000     0. 
   8   2   3      8.06    0.30  0. 1.0000     0. 
   9  -2   3      2.39    0.37  0. 1.0000     0. 
   9  -2   3      2.15    0.15  0. 1.0000     0. 
  -9   2  -3      2.24    0.32  0. 1.0000     0. 
   9   2   3      1.94    0.13  0. 1.0000     0. 
  10  -2   3      0.25    0.07  0. 1.0000     0. 
  10   2   3      0.27    0.06  0. 1.0000     0. 
 -10   2  -3      0.21    0.18  0. 1.0000     0. 
  11  -2   3      1.04    0.10  0. 1.0000     0. 
  11   2   3      0.96    0.08  0. 1.0000     0. 
  11   3  -3     20.24    0.63  0. 1.0000     0. 
  10  -3  -3      3.08    0.21  0. 1.0000     0. 
  10  -3  -3      3.07    0.17  0. 1.0000     0. 
  10  -3  -3      3.18    0.16  0. 1.0000     0. 
  10   3  -3      3.19    0.16  0. 1.0000     0. 
 -10   3   3      3.39    0.35  0. 1.0000     0. 
   9  -3  -3      2.47    0.15  0. 1.0000     0. 
   9  -3  -3      2.28    0.21  0. 1.0000     0. 
   9  -3  -3      2.66    0.17  0. 1.0000     0. 
   9  -3  -3      2.91    0.17  0. 1.0000     0. 
  -9   3   3      2.62    0.35  0. 1.0000     0. 
   9   3  -3      2.41    0.15  0. 1.0000     0. 
   9   3  -3      2.93    0.16  0. 1.0000     0. 
  -8  -3   3      1.88    0.36  0. 1.0000     0. 
   8  -3  -3      2.01    0.33  0. 1.0000     0. 
  -8  -3   3      1.54    0.26  0. 1.0000     0. 
   8  -3  -3      1.54    0.14  0. 1.0000     0. 
   8  -3  -3      1.65    0.15  0. 1.0000     0. 
   8  -3  -3      1.90    0.19  0. 1.0000     0. 
   8   3  -3      1.53    0.13  0. 1.0000     0. 
  -8   3   3      1.57    0.27  0. 1.0000     0. 
  -7  -3   3      7.36    0.48  0. 1.0000     0. 
   7  -3  -3      8.31    0.53  0. 1.0000     0. 
  -7  -3   3      7.98    0.56  0. 1.0000     0. 
   7   3  -3      7.80    0.29  0. 1.0000     0. 
  -7   3   3      8.16    0.56  0. 1.0000     0. 
   7   3  -3      8.34    0.29  0. 1.0000     0. 
   6  -3  -3      4.17    0.13  0. 1.0000     0. 
  -6  -3   3      4.33    0.39  0. 1.0000     0. 
   6  -3  -3      4.20    0.35  0. 1.0000     0. 
   6  -3  -3      4.14    0.26  0. 1.0000     0. 
  -6  -3   3      4.43    0.35  0. 1.0000     0. 
  -6   3   3      4.91    0.40  0. 1.0000     0. 
   5  -3  -3     14.13    0.65  0. 1.0000     0. 
   5  -3  -3     13.55    0.64  0. 1.0000     0. 
  -5   3   3     14.05    0.68  0. 1.0000     0. 
   4  -3  -3     29.81    1.14  0. 1.0000     0. 
  -4   3   3     30.91    1.18  0. 1.0000     0. 
  -3  -3   3     45.25    1.73  0. 1.0000     0. 
  -3  -3   3     45.16    2.04  0. 1.0000     0. 
   3  -3  -3     48.65    1.75  0. 1.0000     0. 
  -3   3   3     48.96    1.70  0. 1.0000     0. 
   2  -3  -3     38.83    1.77  0. 1.0000     0. 
   2  -3  -3     42.98    1.51  0. 1.0000     0. 
  -2  -3   3     40.11    1.76  0. 1.0000     0. 
  -2  -3   3     41.48    1.69  0. 1.0000     0. 
  -2  -3   3     40.40    1.50  0. 1.0000     0. 
   2   3  -3     38.99    1.52  0. 1.0000     0. 
   2   3  -3     38.93    1.69  0. 1.0000     0. 
  -2   3   3     38.73    1.68  0. 1.0000     0. 
  -2   3   3     43.51    1.45  0. 1.0000     0. 
   2   3  -3     39.40    1.52  0. 1.0000     0. 
  -1  -3   3     36.67    1.39  0. 1.0000     0. 
   1  -3  -3     38.67    1.62  0. 1.0000     0. 
   1  -3  -3     38.44    1.39  0. 1.0000     0. 
   1   3  -3     35.86    1.54  0. 1.0000     0. 
  -1   3   3     36.67    1.31  0. 1.0000     0. 
   1   3  -3     36.38    1.41  0. 1.0000     0. 
  -1   3   3     37.20    1.41  0. 1.0000     0. 
  -1   3   3     36.05    1.52  0. 1.0000     0. 
   0  -3   3     39.85    1.47  0. 1.0000     0. 
   0  -3  -3     40.09    1.46  0. 1.0000     0. 
   0  -3  -3     39.56    1.60  0. 1.0000     0. 
   0  -3   3     40.93    1.63  0. 1.0000     0. 
   0  -3  -3     37.32    1.67  0. 1.0000     0. 
   0   3  -3     38.89    1.62  0. 1.0000     0. 
   0   3  -3     38.99    1.69  0. 1.0000     0. 
   0   3   3     38.17    1.61  0. 1.0000     0. 
   0   3  -3     37.33    1.49  0. 1.0000     0. 
   0   3   3     40.26    1.46  0. 1.0000     0. 
  -1  -3  -3    135.83    4.74  0. 1.0000     0. 
  -1  -3  -3    132.75    5.29  0. 1.0000     0. 
   1  -3   3    140.95    4.77  0. 1.0000     0. 
   1  -3   3    135.04    5.31  0. 1.0000     0. 
  -1   3  -3    133.91    4.94  0. 1.0000     0. 
  -1   3  -3    130.23    5.62  0. 1.0000     0. 
  -1   3  -3    128.36    5.31  0. 1.0000     0. 
   1   3   3    135.37    4.50  0. 1.0000     0. 
   1   3   3    131.78    5.29  0. 1.0000     0. 
  -2  -3  -3     99.36    3.42  0. 1.0000     0. 
   2  -3   3    102.59    3.46  0. 1.0000     0. 
  -2  -3  -3     99.79    3.84  0. 1.0000     0. 
   2  -3   3     93.63    3.57  0. 1.0000     0. 
  -2   3  -3     88.70    4.07  0. 1.0000     0. 
   2   3   3     92.26    3.84  0. 1.0000     0. 
  -2   3  -3    100.72    3.27  0. 1.0000     0. 
  -2   3  -3     91.21    3.85  0. 1.0000     0. 
  -3  -3  -3      2.19    0.21  0. 1.0000     0. 
   3  -3   3      2.12    0.21  0. 1.0000     0. 
   3  -3   3      1.85    0.17  0. 1.0000     0. 
   3  -3   3      2.19    0.21  0. 1.0000     0. 
  -3   3  -3      2.02    0.20  0. 1.0000     0. 
   4  -3   3     69.01    2.39  0. 1.0000     0. 
   4  -3   3     67.61    2.56  0. 1.0000     0. 
  -4   3  -3     68.36    2.41  0. 1.0000     0. 
   5  -3   3      3.34    0.29  0. 1.0000     0. 
  -5   3  -3      2.52    0.26  0. 1.0000     0. 
   5   3   3      2.36    0.26  0. 1.0000     0. 
   6  -3   3     26.46    1.12  0. 1.0000     0. 
   6   3   3     27.58    1.13  0. 1.0000     0. 
   7  -3   3     15.23    0.79  0. 1.0000     0. 
   7  -3   3     16.11    0.57  0. 1.0000     0. 
   7   3   3     15.24    0.52  0. 1.0000     0. 
   7   3   3     15.11    0.79  0. 1.0000     0. 
   8  -3   3      1.12    0.08  0. 1.0000     0. 
   8  -3   3      1.11    0.27  0. 1.0000     0. 
   8  -3   3      1.11    0.09  0. 1.0000     0. 
   8  -3   3      1.41    0.16  0. 1.0000     0. 
   8  -3   3      1.10    0.11  0. 1.0000     0. 
   8  -3   3      1.16    0.11  0. 1.0000     0. 
   8   3   3      0.85    0.12  0. 1.0000     0. 
   8   3   3      0.83    0.09  0. 1.0000     0. 
   9  -3   3      1.75    0.15  0. 1.0000     0. 
   9  -3   3      1.83    0.18  0. 1.0000     0. 
   9   3   3      1.91    0.12  0. 1.0000     0. 
  -9   3  -3      1.62    0.29  0. 1.0000     0. 
  10  -3   3      0.26    0.07  0. 1.0000     0. 
  10   3   3      0.22    0.05  0. 1.0000     0. 
  10   3   3      0.24    0.06  0. 1.0000     0. 
 -10   3  -3      0.12    0.17  0. 1.0000     0. 
  11  -3   3      1.14    0.10  0. 1.0000     0. 
  11   3   3      0.89    0.07  0. 1.0000     0. 
  11  -4  -3      3.25    0.15  0. 1.0000     0. 
  11   4  -3      3.16    0.14  0. 1.0000     0. 
  10  -4  -3      0.18    0.07  0. 1.0000     0. 
  10  -4  -3      0.35    0.11  0. 1.0000     0. 
  10  -4  -3      0.16    0.07  0. 1.0000     0. 
 -10   4   3      0.19    0.16  0. 1.0000     0. 
  10   4  -3      0.01    0.05  0. 1.0000     0. 
   9  -4  -3      0.44    0.09  0. 1.0000     0. 
   9  -4  -3      0.43    0.08  0. 1.0000     0. 
   9  -4  -3      0.34    0.08  0. 1.0000     0. 
   9  -4  -3      0.39    0.12  0. 1.0000     0. 
   9   4  -3      0.37    0.07  0. 1.0000     0. 
  -9   4   3      0.52    0.20  0. 1.0000     0. 
   8  -4  -3      0.84    0.11  0. 1.0000     0. 
   8  -4  -3      0.91    0.11  0. 1.0000     0. 
   8  -4  -3      0.68    0.23  0. 1.0000     0. 
   8  -4  -3      0.75    0.14  0. 1.0000     0. 
  -8   4   3      0.77    0.23  0. 1.0000     0. 
   8   4  -3      0.70    0.09  0. 1.0000     0. 
   8   4  -3      0.76    0.09  0. 1.0000     0. 
   7  -4  -3      7.36    0.51  0. 1.0000     0. 
  -7  -4   3      6.28    0.53  0. 1.0000     0. 
   7  -4  -3      7.28    0.31  0. 1.0000     0. 
  -7   4   3      8.32    0.56  0. 1.0000     0. 
   6  -4  -3     89.47    2.31  0. 1.0000     0. 
   6  -4  -3     84.83    3.10  0. 1.0000     0. 
  -6  -4   3     86.08    3.18  0. 1.0000     0. 
  -6   4   3     88.04    3.17  0. 1.0000     0. 
   5  -4  -3      0.65    0.17  0. 1.0000     0. 
  -5   4   3      0.40    0.17  0. 1.0000     0. 
   4  -4  -3     36.45    1.32  0. 1.0000     0. 
  -4   4   3     34.07    1.35  0. 1.0000     0. 
   3  -4  -3    101.32    3.63  0. 1.0000     0. 
   3  -4  -3     95.97    3.40  0. 1.0000     0. 
  -3   4   3    103.20    3.47  0. 1.0000     0. 
  -2  -4   3     10.20    0.49  0. 1.0000     0. 
   2  -4  -3     10.71    0.50  0. 1.0000     0. 
  -2  -4   3     10.40    0.54  0. 1.0000     0. 
   2   4  -3     10.17    0.44  0. 1.0000     0. 
   2   4  -3     10.37    0.44  0. 1.0000     0. 
  -2   4   3     10.21    0.47  0. 1.0000     0. 
   1  -4  -3      2.43    0.21  0. 1.0000     0. 
   1  -4  -3      2.37    0.22  0. 1.0000     0. 
  -1  -4   3      2.54    0.24  0. 1.0000     0. 
   1  -4  -3      2.52    0.21  0. 1.0000     0. 
  -1  -4   3      2.47    0.23  0. 1.0000     0. 
  -1   4   3      2.55    0.21  0. 1.0000     0. 
   1   4  -3      2.57    0.23  0. 1.0000     0. 
  -1   4   3      2.59    0.21  0. 1.0000     0. 
  -1   4   3      2.41    0.18  0. 1.0000     0. 
   1   4  -3      2.47    0.18  0. 1.0000     0. 
   1   4  -3      2.48    0.18  0. 1.0000     0. 
   0  -4   3     42.38    1.63  0. 1.0000     0. 
   0  -4  -3     41.54    1.84  0. 1.0000     0. 
   0  -4   3     44.76    1.79  0. 1.0000     0. 
   0  -4  -3     46.89    1.77  0. 1.0000     0. 
   0  -4  -3     41.47    1.60  0. 1.0000     0. 
   0   4  -3     41.92    1.79  0. 1.0000     0. 
   0   4  -3     40.12    1.63  0. 1.0000     0. 
   0   4  -3     44.38    1.64  0. 1.0000     0. 
   0   4   3     42.66    1.60  0. 1.0000     0. 
   0   4   3     41.33    1.77  0. 1.0000     0. 
   1  -4   3    355.55   12.02  0. 1.0000     0. 
  -1  -4  -3    358.37   13.42  0. 1.0000     0. 
  -1  -4  -3    330.99   11.98  0. 1.0000     0. 
  -1  -4  -3    348.36   14.19  0. 1.0000     0. 
   1  -4   3    342.96   13.44  0. 1.0000     0. 
  -1   4  -3    339.64   12.50  0. 1.0000     0. 
  -1   4  -3    332.77   14.24  0. 1.0000     0. 
   1   4   3    340.65   13.42  0. 1.0000     0. 
  -1   4  -3    324.16   13.43  0. 1.0000     0. 
  -2  -4  -3     91.87    3.50  0. 1.0000     0. 
   2  -4   3    100.71    3.55  0. 1.0000     0. 
  -2  -4  -3     98.79    3.93  0. 1.0000     0. 
   2   4   3     96.41    3.93  0. 1.0000     0. 
  -2   4  -3    100.60    3.34  0. 1.0000     0. 
   3  -4   3      1.70    0.20  0. 1.0000     0. 
   3  -4   3      1.98    0.22  0. 1.0000     0. 
  -3  -4  -3      2.22    0.23  0. 1.0000     0. 
  -3   4  -3      2.11    0.21  0. 1.0000     0. 
   4  -4   3      0.43    0.15  0. 1.0000     0. 
  -4   4  -3      0.87    0.17  0. 1.0000     0. 
   5  -4   3     32.47    1.28  0. 1.0000     0. 
   5  -4   3     34.33    1.28  0. 1.0000     0. 
   5   4   3     31.01    1.28  0. 1.0000     0. 
  -5   4  -3     31.80    1.28  0. 1.0000     0. 
   6  -4   3      0.05    0.14  0. 1.0000     0. 
   6   4   3      0.04    0.14  0. 1.0000     0. 
   6   4   3      0.15    0.07  0. 1.0000     0. 
   7  -4   3     18.33    0.89  0. 1.0000     0. 
   7  -4   3     18.18    0.65  0. 1.0000     0. 
   7  -4   3     17.13    0.59  0. 1.0000     0. 
   7   4   3     18.00    0.88  0. 1.0000     0. 
   7   4   3     17.62    0.59  0. 1.0000     0. 
   8  -4   3      6.69    0.52  0. 1.0000     0. 
   8  -4   3      6.27    0.32  0. 1.0000     0. 
   8  -4   3      5.90    0.26  0. 1.0000     0. 
   8  -4   3      6.22    0.27  0. 1.0000     0. 
   8  -4   3      6.37    0.26  0. 1.0000     0. 
   8   4   3      6.33    0.24  0. 1.0000     0. 
   9  -4   3      0.39    0.07  0. 1.0000     0. 
   9  -4   3      0.36    0.12  0. 1.0000     0. 
   9  -4   3      0.40    0.08  0. 1.0000     0. 
   9   4   3      0.40    0.07  0. 1.0000     0. 
   9   4   3      0.45    0.07  0. 1.0000     0. 
  -9   4  -3      0.40    0.19  0. 1.0000     0. 
  10  -4   3      0.80    0.13  0. 1.0000     0. 
  10  -4   3      0.69    0.09  0. 1.0000     0. 
  10   4   3      0.92    0.08  0. 1.0000     0. 
 -10   4  -3      0.61    0.19  0. 1.0000     0. 
  11  -4   3      0.45    0.06  0. 1.0000     0. 
  10  -5  -3      1.02    0.10  0. 1.0000     0. 
  10  -5  -3      1.06    0.14  0. 1.0000     0. 
  10  -5  -3      1.05    0.10  0. 1.0000     0. 
  10   5  -3      1.07    0.10  0. 1.0000     0. 
   9  -5  -3      4.75    0.28  0. 1.0000     0. 
   9  -5  -3      4.89    0.23  0. 1.0000     0. 
   9  -5  -3      4.51    0.23  0. 1.0000     0. 
   9  -5  -3      4.69    0.22  0. 1.0000     0. 
   9   5  -3      4.77    0.21  0. 1.0000     0. 
  -9   5   3      5.47    0.45  0. 1.0000     0. 
   8  -5  -3      0.82    0.26  0. 1.0000     0. 
   8  -5  -3      0.71    0.14  0. 1.0000     0. 
   8  -5  -3      0.46    0.09  0. 1.0000     0. 
   8  -5  -3      0.72    0.11  0. 1.0000     0. 
   8   5  -3      0.70    0.09  0. 1.0000     0. 
  -8   5   3      0.38    0.20  0. 1.0000     0. 
   7  -5  -3     15.71    0.79  0. 1.0000     0. 
   7  -5  -3     15.07    0.54  0. 1.0000     0. 
  -7  -5   3     15.54    0.85  0. 1.0000     0. 
   7  -5  -3     15.45    0.59  0. 1.0000     0. 
  -7   5   3     14.88    0.83  0. 1.0000     0. 
   7   5  -3     15.06    0.50  0. 1.0000     0. 
   7   5  -3     15.38    0.50  0. 1.0000     0. 
   6  -5  -3     -0.06    0.14  0. 1.0000     0. 
   6  -5  -3      0.06    0.04  0. 1.0000     0. 
   6   5  -3      0.03    0.04  0. 1.0000     0. 
   6   5  -3      0.05    0.03  0. 1.0000     0. 
  -6   5   3      0.05    0.16  0. 1.0000     0. 
   5  -5  -3      4.77    0.35  0. 1.0000     0. 
  -5   5   3      4.14    0.37  0. 1.0000     0. 
   4  -5  -3     62.32    2.18  0. 1.0000     0. 
  -4   5   3     59.53    2.22  0. 1.0000     0. 
   3  -5  -3      3.19    0.26  0. 1.0000     0. 
   3  -5  -3      2.81    0.28  0. 1.0000     0. 
  -3   5   3      3.09    0.28  0. 1.0000     0. 
   2  -5  -3      0.17    0.11  0. 1.0000     0. 
  -2  -5   3      0.09    0.11  0. 1.0000     0. 
  -2   5   3      0.02    0.08  0. 1.0000     0. 
   2   5  -3      0.12    0.07  0. 1.0000     0. 
  -2   5   3      0.15    0.12  0. 1.0000     0. 
   2   5  -3      0.01    0.06  0. 1.0000     0. 
  -1  -5   3     48.79    1.97  0. 1.0000     0. 
  -1  -5   3     44.37    1.77  0. 1.0000     0. 
   1  -5  -3     43.32    1.76  0. 1.0000     0. 
   1  -5  -3     46.01    2.03  0. 1.0000     0. 
   1  -5  -3     47.60    1.94  0. 1.0000     0. 
  -1   5   3     47.96    1.78  0. 1.0000     0. 
   1   5  -3     44.77    1.77  0. 1.0000     0. 
   1   5  -3     45.91    1.76  0. 1.0000     0. 
   0  -5  -3      9.15    0.48  0. 1.0000     0. 
   0  -5   3      9.71    0.53  0. 1.0000     0. 
   0  -5  -3      9.54    0.49  0. 1.0000     0. 
   0  -5  -3      9.96    0.51  0. 1.0000     0. 
   0  -5   3      8.88    0.50  0. 1.0000     0. 
   0   5  -3      9.82    0.45  0. 1.0000     0. 
   0   5   3      9.40    0.50  0. 1.0000     0. 
   0   5   3      9.66    0.41  0. 1.0000     0. 
   0   5   3      9.55    0.41  0. 1.0000     0. 
   1  -5   3      1.09    0.19  0. 1.0000     0. 
   1  -5   3      1.16    0.19  0. 1.0000     0. 
  -1  -5  -3      1.06    0.16  0. 1.0000     0. 
  -1  -5  -3      1.42    0.14  0. 1.0000     0. 
  -1  -5  -3      1.57    0.19  0. 1.0000     0. 
  -1   5  -3      1.29    0.17  0. 1.0000     0. 
   1   5   3      1.26    0.18  0. 1.0000     0. 
  -2  -5  -3     30.11    1.30  0. 1.0000     0. 
  -2  -5  -3     31.69    1.27  0. 1.0000     0. 
   2  -5   3     29.08    1.21  0. 1.0000     0. 
  -2  -5  -3     28.24    1.17  0. 1.0000     0. 
  -2  -5  -3     30.46    1.28  0. 1.0000     0. 
   2   5   3     26.37    1.13  0. 1.0000     0. 
   3  -5   3      1.66    0.24  0. 1.0000     0. 
  -3   5  -3      2.08    0.23  0. 1.0000     0. 
   4  -5   3     20.99    0.87  0. 1.0000     0. 
  -4  -5  -3     20.20    0.92  0. 1.0000     0. 
   4   5   3     21.26    0.87  0. 1.0000     0. 
  -4   5  -3     18.47    0.84  0. 1.0000     0. 
   5  -5   3     12.53    0.63  0. 1.0000     0. 
  -5   5  -3     12.44    0.63  0. 1.0000     0. 
   5   5   3     11.79    0.62  0. 1.0000     0. 
   6  -5   3      3.81    0.38  0. 1.0000     0. 
   6   5   3      4.44    0.39  0. 1.0000     0. 
   6   5   3      3.60    0.19  0. 1.0000     0. 
   7  -5   3      1.54    0.30  0. 1.0000     0. 
   7  -5   3      1.25    0.12  0. 1.0000     0. 
   7  -5   3      1.16    0.12  0. 1.0000     0. 
   7  -5   3      1.19    0.15  0. 1.0000     0. 
   7   5   3      1.26    0.09  0. 1.0000     0. 
   8  -5   3      0.37    0.21  0. 1.0000     0. 
   8  -5   3      0.37    0.12  0. 1.0000     0. 
   8  -5   3      0.51    0.09  0. 1.0000     0. 
   8  -5   3      0.31    0.07  0. 1.0000     0. 
   8  -5   3      0.44    0.09  0. 1.0000     0. 
   8   5   3      0.20    0.06  0. 1.0000     0. 
   8   5   3      0.32    0.06  0. 1.0000     0. 
   9  -5   3      1.57    0.14  0. 1.0000     0. 
   9  -5   3      1.55    0.17  0. 1.0000     0. 
   9  -5   3      1.58    0.14  0. 1.0000     0. 
   9   5   3      1.62    0.11  0. 1.0000     0. 
  -9   5  -3      1.36    0.27  0. 1.0000     0. 
  10  -5   3      2.96    0.20  0. 1.0000     0. 
  10  -5   3      2.84    0.16  0. 1.0000     0. 
  10   5   3      2.57    0.09  0. 1.0000     0. 
  10   5   3      2.63    0.12  0. 1.0000     0. 
  10  -6  -3      7.38    0.32  0. 1.0000     0. 
  10  -6  -3      7.28    0.28  0. 1.0000     0. 
  10  -6  -3      7.01    0.27  0. 1.0000     0. 
  10   6  -3      7.15    0.26  0. 1.0000     0. 
   9  -6  -3      1.62    0.13  0. 1.0000     0. 
   9  -6  -3      1.59    0.15  0. 1.0000     0. 
   9  -6  -3      1.60    0.17  0. 1.0000     0. 
   9  -6  -3      1.48    0.14  0. 1.0000     0. 
   9   6  -3      1.35    0.12  0. 1.0000     0. 
  -9   6   3      1.63    0.28  0. 1.0000     0. 
   8  -6  -3      2.17    0.34  0. 1.0000     0. 
   8  -6  -3      1.55    0.18  0. 1.0000     0. 
   8  -6  -3      1.69    0.15  0. 1.0000     0. 
   8  -6  -3      1.54    0.14  0. 1.0000     0. 
   8   6  -3      1.53    0.13  0. 1.0000     0. 
  -8   6   3      2.07    0.30  0. 1.0000     0. 
   7  -6  -3      1.65    0.15  0. 1.0000     0. 
  -7  -6   3      1.55    0.33  0. 1.0000     0. 
   7  -6  -3      1.56    0.29  0. 1.0000     0. 
   7  -6  -3      1.62    0.18  0. 1.0000     0. 
   7  -6  -3      1.57    0.15  0. 1.0000     0. 
  -7   6   3      1.57    0.33  0. 1.0000     0. 
   7   6  -3      1.52    0.12  0. 1.0000     0. 
   6  -6  -3      0.13    0.05  0. 1.0000     0. 
   6  -6  -3      0.22    0.18  0. 1.0000     0. 
  -6   6   3      0.05    0.17  0. 1.0000     0. 
   5  -6  -3      5.13    0.39  0. 1.0000     0. 
  -5   6   3      4.96    0.40  0. 1.0000     0. 
   4  -6  -3      0.60    0.18  0. 1.0000     0. 
  -4   6   3      0.73    0.19  0. 1.0000     0. 
   3  -6  -3      1.68    0.24  0. 1.0000     0. 
   3  -6  -3      2.01    0.24  0. 1.0000     0. 
  -3   6   3      1.70    0.24  0. 1.0000     0. 
  -2  -6   3      3.87    0.35  0. 1.0000     0. 
   2  -6  -3      3.86    0.34  0. 1.0000     0. 
  -2   6   3      4.31    0.30  0. 1.0000     0. 
   2   6  -3      4.05    0.22  0. 1.0000     0. 
   2   6  -3      4.24    0.22  0. 1.0000     0. 
   1  -6  -3     55.74    2.13  0. 1.0000     0. 
  -1  -6   3     56.87    2.15  0. 1.0000     0. 
  -1   6   3     54.43    2.05  0. 1.0000     0. 
  -1   6   3     57.52    2.14  0. 1.0000     0. 
   1   6  -3     54.90    2.12  0. 1.0000     0. 
   0  -6   3      5.60    0.41  0. 1.0000     0. 
   0  -6  -3      4.83    0.34  0. 1.0000     0. 
   0  -6  -3      5.77    0.37  0. 1.0000     0. 
   0  -6  -3      5.06    0.36  0. 1.0000     0. 
   0   6   3      5.19    0.26  0. 1.0000     0. 
   0   6   3      5.65    0.32  0. 1.0000     0. 
   0   6  -3      5.63    0.32  0. 1.0000     0. 
   0   6   3      5.22    0.26  0. 1.0000     0. 
  -1  -6  -3     22.66    0.97  0. 1.0000     0. 
   1  -6   3     20.64    0.98  0. 1.0000     0. 
  -1  -6  -3     24.03    1.04  0. 1.0000     0. 
   1   6   3     21.42    0.90  0. 1.0000     0. 
  -1   6  -3     22.43    0.95  0. 1.0000     0. 
   2  -6   3     23.89    1.12  0. 1.0000     0. 
  -2  -6  -3     26.83    1.10  0. 1.0000     0. 
  -2  -6  -3     28.81    1.19  0. 1.0000     0. 
   2   6   3     24.60    1.05  0. 1.0000     0. 
   3  -6   3      0.02    0.14  0. 1.0000     0. 
  -3  -6  -3      0.08    0.09  0. 1.0000     0. 
   4  -6   3      1.38    0.24  0. 1.0000     0. 
   4   6   3      1.20    0.23  0. 1.0000     0. 
   5  -6   3     15.61    0.44  0. 1.0000     0. 
   5  -6   3     16.62    0.79  0. 1.0000     0. 
  -5   6  -3     15.50    0.76  0. 1.0000     0. 
   6  -6   3      0.10    0.17  0. 1.0000     0. 
   7  -6   3      2.62    0.38  0. 1.0000     0. 
   7  -6   3      2.60    0.22  0. 1.0000     0. 
   7  -6   3      2.67    0.18  0. 1.0000     0. 
   7  -6   3      2.84    0.19  0. 1.0000     0. 
   7   6   3      2.79    0.14  0. 1.0000     0. 
   8  -6   3     11.24    0.43  0. 1.0000     0. 
   8  -6   3     11.21    0.48  0. 1.0000     0. 
   8  -6   3     12.52    0.73  0. 1.0000     0. 
   8  -6   3     11.69    0.42  0. 1.0000     0. 
   8  -6   3     11.44    0.44  0. 1.0000     0. 
   8   6   3     11.07    0.38  0. 1.0000     0. 
   9  -6   3     12.33    0.44  0. 1.0000     0. 
   9  -6   3     11.99    0.43  0. 1.0000     0. 
   9  -6   3     11.49    0.49  0. 1.0000     0. 
   9   6   3     12.64    0.32  0. 1.0000     0. 
  -9   6  -3     13.02    0.69  0. 1.0000     0. 
   9   6   3     12.11    0.40  0. 1.0000     0. 
  10  -6   3      0.85    0.09  0. 1.0000     0. 
  10  -6   3      0.97    0.14  0. 1.0000     0. 
  10   6   3      0.82    0.04  0. 1.0000     0. 
  10  -7  -3      0.31    0.10  0. 1.0000     0. 
  10  -7  -3      0.16    0.07  0. 1.0000     0. 
  10   7  -3      0.31    0.06  0. 1.0000     0. 
   9  -7  -3      0.36    0.09  0. 1.0000     0. 
   9  -7  -3      0.35    0.08  0. 1.0000     0. 
   9  -7  -3      0.35    0.12  0. 1.0000     0. 
  -9   7   3      0.27    0.17  0. 1.0000     0. 
   9   7  -3      0.33    0.07  0. 1.0000     0. 
   8  -7  -3      0.00    0.11  0. 1.0000     0. 
   8  -7  -3      0.28    0.09  0. 1.0000     0. 
   8   7  -3      0.33    0.07  0. 1.0000     0. 
  -8   7   3      0.03    0.17  0. 1.0000     0. 
   7  -7  -3      0.22    0.10  0. 1.0000     0. 
   7  -7  -3      0.08    0.11  0. 1.0000     0. 
   7  -7  -3      0.21    0.10  0. 1.0000     0. 
   7  -7  -3      0.01    0.18  0. 1.0000     0. 
   7   7  -3      0.40    0.07  0. 1.0000     0. 
   6  -7  -3      1.26    0.28  0. 1.0000     0. 
   6  -7  -3      1.10    0.10  0. 1.0000     0. 
   6  -7  -3      1.36    0.14  0. 1.0000     0. 
   6   7  -3      1.27    0.11  0. 1.0000     0. 
  -6   7   3      0.85    0.25  0. 1.0000     0. 
   5  -7  -3      0.04    0.14  0. 1.0000     0. 
   5   7  -3      0.09    0.04  0. 1.0000     0. 
  -5   7   3      0.14    0.17  0. 1.0000     0. 
   4  -7  -3      0.37    0.17  0. 1.0000     0. 
  -4   7   3      0.34    0.17  0. 1.0000     0. 
   3  -7  -3      2.09    0.27  0. 1.0000     0. 
   3  -7  -3      1.79    0.27  0. 1.0000     0. 
   2  -7  -3      6.92    0.48  0. 1.0000     0. 
  -2  -7   3      6.89    0.48  0. 1.0000     0. 
  -2   7   3      7.40    0.41  0. 1.0000     0. 
  -2   7   3      6.99    0.41  0. 1.0000     0. 
  -1  -7   3     17.17    0.86  0. 1.0000     0. 
   1  -7  -3     18.73    0.87  0. 1.0000     0. 
   1   7  -3     18.25    0.75  0. 1.0000     0. 
  -1   7   3     18.20    0.77  0. 1.0000     0. 
  -1   7   3     16.96    0.76  0. 1.0000     0. 
   0  -7  -3      1.67    0.24  0. 1.0000     0. 
   0  -7   3      1.42    0.25  0. 1.0000     0. 
   0   7   3      1.43    0.14  0. 1.0000     0. 
   0   7  -3      1.76    0.20  0. 1.0000     0. 
   0   7   3      1.80    0.21  0. 1.0000     0. 
   0   7   3      1.76    0.14  0. 1.0000     0. 
   1  -7   3     78.95    3.00  0. 1.0000     0. 
  -1  -7  -3     78.41    2.97  0. 1.0000     0. 
  -1  -7  -3     83.16    3.41  0. 1.0000     0. 
   1   7   3     75.34    2.86  0. 1.0000     0. 
  -1   7  -3     77.76    3.02  0. 1.0000     0. 
  -2  -7  -3      3.81    0.28  0. 1.0000     0. 
  -2  -7  -3      3.27    0.33  0. 1.0000     0. 
   2  -7   3      2.74    0.33  0. 1.0000     0. 
   2   7   3      2.76    0.26  0. 1.0000     0. 
   3  -7   3      4.60    0.42  0. 1.0000     0. 
   4  -7   3     41.33    1.62  0. 1.0000     0. 
   5  -7   3     15.63    0.80  0. 1.0000     0. 
   5  -7   3     16.15    0.46  0. 1.0000     0. 
   6  -7   3     36.30    1.19  0. 1.0000     0. 
   6  -7   3     37.69    1.55  0. 1.0000     0. 
   7  -7   3      0.56    0.11  0. 1.0000     0. 
   7  -7   3      0.91    0.28  0. 1.0000     0. 
   7  -7   3      0.67    0.10  0. 1.0000     0. 
   7  -7   3      0.73    0.14  0. 1.0000     0. 
   7   7   3      0.71    0.08  0. 1.0000     0. 
   8  -7   3      9.83    0.39  0. 1.0000     0. 
   8  -7   3      9.82    0.39  0. 1.0000     0. 
   8  -7   3     10.29    0.37  0. 1.0000     0. 
   8  -7   3      9.89    0.39  0. 1.0000     0. 
   8  -7   3     10.04    0.44  0. 1.0000     0. 
   8   7   3      9.46    0.34  0. 1.0000     0. 
   9  -7   3      2.91    0.18  0. 1.0000     0. 
   9  -7   3      3.53    0.24  0. 1.0000     0. 
   9  -7   3      3.13    0.18  0. 1.0000     0. 
  -9   7  -3      3.37    0.35  0. 1.0000     0. 
   9   7   3      3.27    0.11  0. 1.0000     0. 
   9   7   3      3.03    0.14  0. 1.0000     0. 
  10  -7   3      1.12    0.11  0. 1.0000     0. 
  10  -7   3      1.08    0.14  0. 1.0000     0. 
  10  -8  -3      1.81    0.15  0. 1.0000     0. 
  10  -8  -3      1.54    0.12  0. 1.0000     0. 
  10   8  -3      1.69    0.09  0. 1.0000     0. 
   9  -8  -3      1.53    0.13  0. 1.0000     0. 
   9  -8  -3      1.52    0.15  0. 1.0000     0. 
   9  -8  -3      1.43    0.16  0. 1.0000     0. 
   9   8  -3      1.60    0.11  0. 1.0000     0. 
   8  -8  -3      0.21    0.11  0. 1.0000     0. 
   8  -8  -3      0.18    0.09  0. 1.0000     0. 
   8   8  -3      0.07    0.06  0. 1.0000     0. 
   7  -8  -3      1.89    0.19  0. 1.0000     0. 
   7  -8  -3      2.03    0.35  0. 1.0000     0. 
   7  -8  -3      2.10    0.19  0. 1.0000     0. 
   7  -8  -3      2.24    0.20  0. 1.0000     0. 
   7   8  -3      1.98    0.14  0. 1.0000     0. 
   6  -8  -3      1.53    0.15  0. 1.0000     0. 
   6  -8  -3      1.60    0.11  0. 1.0000     0. 
   6  -8  -3      1.55    0.29  0. 1.0000     0. 
   6  -8  -3      1.82    0.19  0. 1.0000     0. 
   6   8  -3      1.51    0.13  0. 1.0000     0. 
   5  -8  -3     -0.13    0.15  0. 1.0000     0. 
   5   8  -3      0.04    0.03  0. 1.0000     0. 
   5   8  -3      0.08    0.03  0. 1.0000     0. 
   4  -8  -3      0.76    0.22  0. 1.0000     0. 
   3  -8  -3      0.40    0.19  0. 1.0000     0. 
  -3   8   3      0.61    0.17  0. 1.0000     0. 
   2  -8  -3     10.36    0.63  0. 1.0000     0. 
  -2  -8   3      9.78    0.63  0. 1.0000     0. 
  -2   8   3     10.99    0.55  0. 1.0000     0. 
  -2   8   3     10.39    0.54  0. 1.0000     0. 
  -1  -8   3     25.05    1.17  0. 1.0000     0. 
   1  -8  -3     23.66    1.14  0. 1.0000     0. 
  -1   8   3     24.47    1.04  0. 1.0000     0. 
   1   8  -3     26.44    1.03  0. 1.0000     0. 
  -1   8   3     26.50    1.05  0. 1.0000     0. 
   0  -8   3     18.77    0.93  0. 1.0000     0. 
   0  -8  -3     17.59    0.89  0. 1.0000     0. 
   0   8   3     17.75    0.78  0. 1.0000     0. 
   0   8  -3     18.54    0.80  0. 1.0000     0. 
   1  -8   3     44.79    1.81  0. 1.0000     0. 
  -1  -8  -3     43.03    1.77  0. 1.0000     0. 
  -1   8  -3     42.16    1.73  0. 1.0000     0. 
   1   8   3     42.69    1.65  0. 1.0000     0. 
   2  -8   3      0.60    0.23  0. 1.0000     0. 
  -2  -8  -3      0.68    0.21  0. 1.0000     0. 
   2   8   3      0.50    0.15  0. 1.0000     0. 
   3  -8   3      6.01    0.52  0. 1.0000     0. 
   4  -8   3      1.02    0.25  0. 1.0000     0. 
   5  -8   3      4.15    0.42  0. 1.0000     0. 
   5  -8   3      4.33    0.17  0. 1.0000     0. 
   6  -8   3      1.58    0.08  0. 1.0000     0. 
   6  -8   3      1.67    0.17  0. 1.0000     0. 
   6  -8   3      1.65    0.15  0. 1.0000     0. 
   6  -8   3      1.35    0.30  0. 1.0000     0. 
   6   8   3      1.38    0.11  0. 1.0000     0. 
   7  -8   3     20.48    1.02  0. 1.0000     0. 
   7  -8   3     19.68    0.65  0. 1.0000     0. 
   7  -8   3     19.60    0.68  0. 1.0000     0. 
   7  -8   3     20.16    0.72  0. 1.0000     0. 
   7   8   3     18.08    0.61  0. 1.0000     0. 
   8  -8   3      7.31    0.29  0. 1.0000     0. 
   8  -8   3      7.45    0.32  0. 1.0000     0. 
   8  -8   3      7.23    0.31  0. 1.0000     0. 
   8  -8   3      6.94    0.35  0. 1.0000     0. 
   8  -8   3      7.37    0.31  0. 1.0000     0. 
   8   8   3      7.24    0.20  0. 1.0000     0. 
   8   8   3      6.76    0.26  0. 1.0000     0. 
   9  -8   3      3.11    0.17  0. 1.0000     0. 
   9  -8   3      3.22    0.18  0. 1.0000     0. 
   9  -8   3      3.40    0.23  0. 1.0000     0. 
  -9   8  -3      2.28    0.31  0. 1.0000     0. 
   9   8   3      2.99    0.09  0. 1.0000     0. 
  10  -8   3      4.97    0.24  0. 1.0000     0. 
   9  -9  -3      0.61    0.12  0. 1.0000     0. 
   9  -9  -3      0.55    0.07  0. 1.0000     0. 
   9  -9  -3      0.58    0.09  0. 1.0000     0. 
   9   9  -3      0.61    0.07  0. 1.0000     0. 
   8  -9  -3      2.33    0.21  0. 1.0000     0. 
   8  -9  -3      2.78    0.18  0. 1.0000     0. 
   8   9  -3      2.16    0.14  0. 1.0000     0. 
   7  -9  -3      2.84    0.23  0. 1.0000     0. 
   7  -9  -3      2.31    0.20  0. 1.0000     0. 
   7  -9  -3      2.61    0.20  0. 1.0000     0. 
   7  -9  -3      2.13    0.36  0. 1.0000     0. 
   7   9  -3      2.30    0.15  0. 1.0000     0. 
   6  -9  -3      2.93    0.14  0. 1.0000     0. 
   6  -9  -3      2.95    0.21  0. 1.0000     0. 
   6  -9  -3      2.34    0.36  0. 1.0000     0. 
   6  -9  -3      2.84    0.22  0. 1.0000     0. 
  -6   9   3      2.52    0.36  0. 1.0000     0. 
   6   9  -3      2.40    0.16  0. 1.0000     0. 
   5  -9  -3      8.81    0.37  0. 1.0000     0. 
   5  -9  -3      8.28    0.58  0. 1.0000     0. 
   5   9  -3      8.87    0.33  0. 1.0000     0. 
  -5   9   3      9.69    0.61  0. 1.0000     0. 
   4  -9  -3      3.17    0.39  0. 1.0000     0. 
  -4   9   3      2.69    0.34  0. 1.0000     0. 
   4   9  -3      3.07    0.14  0. 1.0000     0. 
   3  -9  -3      0.38    0.21  0. 1.0000     0. 
  -3   9   3      0.45    0.17  0. 1.0000     0. 
  -2  -9   3     -0.07    0.17  0. 1.0000     0. 
   2  -9  -3      0.19    0.18  0. 1.0000     0. 
  -2   9   3      0.26    0.14  0. 1.0000     0. 
  -2   9   3      0.47    0.14  0. 1.0000     0. 
   1  -9  -3      6.31    0.51  0. 1.0000     0. 
  -1  -9   3      5.68    0.51  0. 1.0000     0. 
  -1   9   3      5.51    0.37  0. 1.0000     0. 
   1   9  -3      6.34    0.32  0. 1.0000     0. 
  -1   9   3      6.32    0.35  0. 1.0000     0. 
   0  -9  -3      2.00    0.31  0. 1.0000     0. 
   0  -9   3      1.67    0.30  0. 1.0000     0. 
   0   9   3      1.47    0.22  0. 1.0000     0. 
   0   9  -3      2.23    0.22  0. 1.0000     0. 
  -1  -9  -3     48.10    2.07  0. 1.0000     0. 
   1  -9   3     48.98    2.09  0. 1.0000     0. 
  -1   9  -3     52.87    2.02  0. 1.0000     0. 
  -2  -9  -3     63.90    2.57  0. 1.0000     0. 
   2  -9   3     65.15    2.61  0. 1.0000     0. 
   3  -9   3      3.86    0.46  0. 1.0000     0. 
   4  -9   3      8.37    0.58  0. 1.0000     0. 
   5  -9   3      5.52    0.21  0. 1.0000     0. 
   5  -9   3      5.62    0.50  0. 1.0000     0. 
   5  -9   3      5.83    0.28  0. 1.0000     0. 
   5   9   3      5.65    0.22  0. 1.0000     0. 
   6  -9   3     13.79    0.50  0. 1.0000     0. 
   6  -9   3     13.12    0.37  0. 1.0000     0. 
   6  -9   3     13.32    0.52  0. 1.0000     0. 
   6  -9   3     12.97    0.79  0. 1.0000     0. 
   6   9   3     13.00    0.44  0. 1.0000     0. 
   7  -9   3      1.22    0.16  0. 1.0000     0. 
   7  -9   3      0.70    0.12  0. 1.0000     0. 
   7  -9   3      0.18    0.22  0. 1.0000     0. 
   7   9   3      0.73    0.08  0. 1.0000     0. 
   8  -9   3      5.01    0.28  0. 1.0000     0. 
   8  -9   3      5.11    0.25  0. 1.0000     0. 
   8  -9   3      4.70    0.25  0. 1.0000     0. 
   8  -9   3      5.41    0.25  0. 1.0000     0. 
   8   9   3      4.84    0.19  0. 1.0000     0. 
   8   9   3      5.25    0.15  0. 1.0000     0. 
   9  -9   3      5.31    0.23  0. 1.0000     0. 
   9  -9   3      5.15    0.27  0. 1.0000     0. 
   9 -10  -3      1.55    0.13  0. 1.0000     0. 
   9 -10  -3      1.36    0.14  0. 1.0000     0. 
   9  10  -3      1.37    0.09  0. 1.0000     0. 
   8 -10  -3      4.91    0.24  0. 1.0000     0. 
   8 -10  -3      4.50    0.26  0. 1.0000     0. 
   8  10  -3      4.84    0.20  0. 1.0000     0. 
   7 -10  -3      0.71    0.14  0. 1.0000     0. 
   7 -10  -3      0.83    0.13  0. 1.0000     0. 
   7 -10  -3      0.75    0.12  0. 1.0000     0. 
   7  10  -3      0.74    0.08  0. 1.0000     0. 
   6 -10  -3     16.76    0.62  0. 1.0000     0. 
   6 -10  -3     16.19    0.48  0. 1.0000     0. 
   6 -10  -3     14.54    0.84  0. 1.0000     0. 
  -6  10   3     17.34    0.89  0. 1.0000     0. 
   6  10  -3     15.90    0.53  0. 1.0000     0. 
   5 -10  -3      0.87    0.27  0. 1.0000     0. 
   5 -10  -3      0.81    0.14  0. 1.0000     0. 
  -5  10   3      0.75    0.24  0. 1.0000     0. 
   5  10  -3      0.78    0.09  0. 1.0000     0. 
   4 -10  -3      6.28    0.51  0. 1.0000     0. 
   4  10  -3      7.69    0.28  0. 1.0000     0. 
  -4  10   3      7.57    0.53  0. 1.0000     0. 
  -4  10   3      7.43    0.33  0. 1.0000     0. 
   4  10  -3      7.41    0.28  0. 1.0000     0. 
   4  10  -3      7.46    0.28  0. 1.0000     0. 
   3 -10  -3      5.90    0.47  0. 1.0000     0. 
  -3  10   3      6.06    0.21  0. 1.0000     0. 
  -3  10   3      5.98    0.46  0. 1.0000     0. 
   3  10  -3      6.55    0.26  0. 1.0000     0. 
  -2  10   3     19.28    0.90  0. 1.0000     0. 
  -2  10   3     20.21    0.55  0. 1.0000     0. 
  -1 -10   3      1.60    0.33  0. 1.0000     0. 
  -1  10   3      1.57    0.07  0. 1.0000     0. 
   0 -10   3     -0.19    0.18  0. 1.0000     0. 
   0 -10  -3      0.09    0.18  0. 1.0000     0. 
   0  10  -3      0.21    0.11  0. 1.0000     0. 
   0  10  -3      0.16    0.04  0. 1.0000     0. 
  -1 -10  -3      1.61    0.33  0. 1.0000     0. 
  -1  10  -3      2.27    0.11  0. 1.0000     0. 
  -1  10  -3      2.29    0.26  0. 1.0000     0. 
   2  10   3      1.32    0.09  0. 1.0000     0. 
   4 -10   3      3.19    0.22  0. 1.0000     0. 
   4 -10   3      3.18    0.42  0. 1.0000     0. 
   4  10   3      3.30    0.16  0. 1.0000     0. 
   5 -10   3      1.25    0.10  0. 1.0000     0. 
   5 -10   3      1.29    0.32  0. 1.0000     0. 
   5 -10   3      1.43    0.15  0. 1.0000     0. 
   5  10   3      1.16    0.10  0. 1.0000     0. 
   6 -10   3      1.78    0.09  0. 1.0000     0. 
   6 -10   3      2.18    0.19  0. 1.0000     0. 
   6 -10   3      2.54    0.22  0. 1.0000     0. 
   6 -10   3      2.01    0.36  0. 1.0000     0. 
   6  10   3      1.80    0.12  0. 1.0000     0. 
   7 -10   3     55.02    1.71  0. 1.0000     0. 
   7 -10   3     53.24    1.79  0. 1.0000     0. 
   7  10   3     52.64    1.60  0. 1.0000     0. 
   8 -10   3      6.97    0.33  0. 1.0000     0. 
   8 -10   3      6.98    0.30  0. 1.0000     0. 
   8  10   3      6.97    0.19  0. 1.0000     0. 
   8  10   3      7.06    0.18  0. 1.0000     0. 
   9 -10   3     11.73    0.45  0. 1.0000     0. 
   9 -10   3     11.58    0.40  0. 1.0000     0. 
   9 -11  -3      5.28    0.22  0. 1.0000     0. 
   9 -11  -3      4.98    0.23  0. 1.0000     0. 
   8 -11  -3     11.27    0.45  0. 1.0000     0. 
   8 -11  -3     11.38    0.42  0. 1.0000     0. 
   8  11  -3     11.92    0.38  0. 1.0000     0. 
   7 -11  -3      4.01    0.23  0. 1.0000     0. 
   7 -11  -3      4.42    0.24  0. 1.0000     0. 
   7 -11  -3      3.95    0.24  0. 1.0000     0. 
   7  11  -3      4.09    0.18  0. 1.0000     0. 
   6 -11  -3      5.23    0.20  0. 1.0000     0. 
   6 -11  -3      5.49    0.28  0. 1.0000     0. 
   6 -11  -3      5.13    0.29  0. 1.0000     0. 
   6  11  -3      5.22    0.22  0. 1.0000     0. 
   5 -11  -3      0.66    0.24  0. 1.0000     0. 
  -5  11   3      0.42    0.06  0. 1.0000     0. 
  -5  11   3      0.49    0.10  0. 1.0000     0. 
   5  11  -3      0.15    0.06  0. 1.0000     0. 
   4 -11  -3     10.93    0.67  0. 1.0000     0. 
  -4  11   3     11.02    0.34  0. 1.0000     0. 
   4  11  -3     11.52    0.39  0. 1.0000     0. 
  -4  11   3     10.72    0.43  0. 1.0000     0. 
   4  11  -3     10.47    0.39  0. 1.0000     0. 
   3 -11  -3     13.36    0.76  0. 1.0000     0. 
   3  11  -3     13.70    0.49  0. 1.0000     0. 
  -3  11   3     14.14    0.41  0. 1.0000     0. 
  -3  11   3     13.69    0.51  0. 1.0000     0. 
   3  11  -3     14.59    0.51  0. 1.0000     0. 
   3  11  -3     14.33    0.47  0. 1.0000     0. 
   2  11  -3      9.23    0.36  0. 1.0000     0. 
  -2  11   3      8.82    0.26  0. 1.0000     0. 
   0  11  -3     37.60    1.00  0. 1.0000     0. 
  -1  11  -3     28.39    0.78  0. 1.0000     0. 
   1  11   3     28.29    0.98  0. 1.0000     0. 
   2  11   3     47.12    1.51  0. 1.0000     0. 
   2  11   3     43.46    1.51  0. 1.0000     0. 
  -2  11  -3     44.12    1.22  0. 1.0000     0. 
   3  11   3      1.31    0.11  0. 1.0000     0. 
   4 -11   3      3.28    0.43  0. 1.0000     0. 
   4  11   3      3.36    0.16  0. 1.0000     0. 
   5 -11   3      0.38    0.25  0. 1.0000     0. 
   5 -11   3      0.45    0.07  0. 1.0000     0. 
   5 -11   3      0.41    0.11  0. 1.0000     0. 
   5  11   3      0.25    0.06  0. 1.0000     0. 
   6 -11   3      0.14    0.10  0. 1.0000     0. 
   6 -11   3      0.34    0.11  0. 1.0000     0. 
   6  11   3      0.12    0.05  0. 1.0000     0. 
   7 -11   3      1.45    0.14  0. 1.0000     0. 
   7 -11   3      1.75    0.17  0. 1.0000     0. 
   7  11   3      1.54    0.10  0. 1.0000     0. 
   7  11   3      1.47    0.08  0. 1.0000     0. 
   8 -11   3      3.76    0.19  0. 1.0000     0. 
   8 -11   3      3.39    0.17  0. 1.0000     0. 
   8 -11   3      3.61    0.22  0. 1.0000     0. 
   9 -11   3      7.75    0.31  0. 1.0000     0. 
   8 -12  -3     11.61    0.44  0. 1.0000     0. 
   8 -12  -3     11.62    0.41  0. 1.0000     0. 
   8  12  -3     11.75    0.37  0. 1.0000     0. 
   7 -12  -3      1.63    0.16  0. 1.0000     0. 
   7 -12  -3      1.58    0.16  0. 1.0000     0. 
   7  12  -3      1.72    0.11  0. 1.0000     0. 
  -7  12   3      1.69    0.09  0. 1.0000     0. 
   6 -12  -3     20.32    0.56  0. 1.0000     0. 
   6 -12  -3     19.46    0.69  0. 1.0000     0. 
   6 -12  -3     19.46    0.72  0. 1.0000     0. 
   6 -12  -3     19.44    0.69  0. 1.0000     0. 
  -6  12   3     20.17    0.56  0. 1.0000     0. 
   6  12  -3     19.88    0.63  0. 1.0000     0. 
  -5  12   3      6.81    0.23  0. 1.0000     0. 
   5  12  -3      7.61    0.27  0. 1.0000     0. 
  -5  12   3      7.07    0.32  0. 1.0000     0. 
   4 -12  -3     49.80    1.99  0. 1.0000     0. 
  -4  12   3     50.79    1.62  0. 1.0000     0. 
   4  12  -3     51.12    1.53  0. 1.0000     0. 
  -4  12   3     50.23    1.36  0. 1.0000     0. 
   3 -12  -3      0.05    0.20  0. 1.0000     0. 
   3  12  -3      0.18    0.06  0. 1.0000     0. 
   3  12  -3      0.21    0.05  0. 1.0000     0. 
  -3  12   3      0.16    0.04  0. 1.0000     0. 
  -3  12   3      0.18    0.08  0. 1.0000     0. 
   3  12  -3      0.05    0.06  0. 1.0000     0. 
   2  12  -3      8.02    0.32  0. 1.0000     0. 
   2  12  -3      8.16    0.30  0. 1.0000     0. 
  -2  12   3      7.79    0.31  0. 1.0000     0. 
   2  12  -3      8.38    0.33  0. 1.0000     0. 
  -2  12   3      8.24    0.33  0. 1.0000     0. 
   1  12  -3     17.81    0.62  0. 1.0000     0. 
  -1  12   3     18.47    0.63  0. 1.0000     0. 
   1  12  -3     17.78    0.59  0. 1.0000     0. 
  -1  12   3     17.93    0.59  0. 1.0000     0. 
   0  12  -3     27.68    0.84  0. 1.0000     0. 
   0  12   3     25.62    0.88  0. 1.0000     0. 
   0  12  -3     27.97    0.89  0. 1.0000     0. 
   0  12   3     26.10    0.95  0. 1.0000     0. 
   0  12   3     26.28    0.84  0. 1.0000     0. 
  -1  12  -3     38.41    1.26  0. 1.0000     0. 
   1  12   3     38.90    1.24  0. 1.0000     0. 
   1  12   3     39.86    1.19  0. 1.0000     0. 
  -1  12  -3     39.60    1.04  0. 1.0000     0. 
   1  12   3     37.59    1.33  0. 1.0000     0. 
   2  12   3      0.09    0.06  0. 1.0000     0. 
  -2  12  -3      0.14    0.09  0. 1.0000     0. 
  -2  12  -3      0.08    0.04  0. 1.0000     0. 
   2  12   3      0.12    0.06  0. 1.0000     0. 
  -3  12  -3     33.70    1.12  0. 1.0000     0. 
  -3  12  -3     34.01    0.93  0. 1.0000     0. 
   3  12   3     34.12    1.04  0. 1.0000     0. 
   4 -12   3      0.33    0.24  0. 1.0000     0. 
  -4  12  -3      0.32    0.06  0. 1.0000     0. 
   4  12   3      0.42    0.07  0. 1.0000     0. 
  -4  12  -3      0.34    0.10  0. 1.0000     0. 
   5 -12   3     32.22    1.08  0. 1.0000     0. 
   5 -12   3     32.24    1.12  0. 1.0000     0. 
   5 -12   3     32.51    0.90  0. 1.0000     0. 
   5  12   3     32.72    0.99  0. 1.0000     0. 
   6 -12   3      4.08    0.23  0. 1.0000     0. 
   6 -12   3      4.02    0.24  0. 1.0000     0. 
   6  12   3      3.73    0.16  0. 1.0000     0. 
   7 -12   3      4.64    0.24  0. 1.0000     0. 
   7 -12   3      4.56    0.25  0. 1.0000     0. 
   7 -12   3      5.04    0.24  0. 1.0000     0. 
   7  12   3      5.05    0.18  0. 1.0000     0. 
   7  12   3      5.04    0.14  0. 1.0000     0. 
   7  12   3      4.74    0.14  0. 1.0000     0. 
   8 -12   3      0.45    0.10  0. 1.0000     0. 
   8 -12   3      0.58    0.08  0. 1.0000     0. 
   7 -13  -3     24.68    0.85  0. 1.0000     0. 
   7  13  -3     27.38    0.79  0. 1.0000     0. 
   6 -13  -3      8.18    0.25  0. 1.0000     0. 
  -6  13   3      7.57    0.33  0. 1.0000     0. 
  -6  13   3      8.24    0.23  0. 1.0000     0. 
   6  13  -3      8.24    0.29  0. 1.0000     0. 
   5  13  -3      6.82    0.27  0. 1.0000     0. 
  -5  13   3      7.34    0.21  0. 1.0000     0. 
  -5  13   3      7.39    0.31  0. 1.0000     0. 
   4  13  -3     11.18    0.40  0. 1.0000     0. 
  -4  13   3     12.12    0.45  0. 1.0000     0. 
  -3  13   3      9.23    0.37  0. 1.0000     0. 
   3  13  -3      8.94    0.33  0. 1.0000     0. 
   3  13  -3      8.74    0.33  0. 1.0000     0. 
   2  13  -3     23.74    0.75  0. 1.0000     0. 
   2  13  -3     23.29    0.82  0. 1.0000     0. 
  -2  13   3     24.12    0.80  0. 1.0000     0. 
   2  13  -3     23.09    0.78  0. 1.0000     0. 
  -1  13   3     12.87    0.44  0. 1.0000     0. 
   1  13  -3     12.61    0.47  0. 1.0000     0. 
   1  13  -3     12.54    0.44  0. 1.0000     0. 
  -1  13   3     13.10    0.47  0. 1.0000     0. 
   0  13  -3      6.14    0.26  0. 1.0000     0. 
   0  13   3      6.55    0.27  0. 1.0000     0. 
   0  13   3      6.29    0.26  0. 1.0000     0. 
   0  13  -3      6.35    0.28  0. 1.0000     0. 
   0  13   3      6.35    0.27  0. 1.0000     0. 
  -1  13  -3      6.23    0.28  0. 1.0000     0. 
   1  13   3      5.92    0.24  0. 1.0000     0. 
   1  13   3      6.11    0.25  0. 1.0000     0. 
   1  13   3      5.82    0.25  0. 1.0000     0. 
  -2  13  -3     64.00    1.76  0. 1.0000     0. 
   2  13   3     67.81    1.99  0. 1.0000     0. 
  -2  13  -3     67.77    2.10  0. 1.0000     0. 
   3 -13   3      1.46    0.33  0. 1.0000     0. 
  -3  13  -3      2.24    0.18  0. 1.0000     0. 
  -3  13  -3      2.08    0.11  0. 1.0000     0. 
   3  13   3      2.00    0.13  0. 1.0000     0. 
   4  13   3      3.94    0.18  0. 1.0000     0. 
  -4  13  -3      4.58    0.24  0. 1.0000     0. 
  -4  13  -3      4.16    0.16  0. 1.0000     0. 
   5 -13   3      3.25    0.13  0. 1.0000     0. 
   5  13   3      2.42    0.14  0. 1.0000     0. 
   6 -13   3      0.42    0.10  0. 1.0000     0. 
   6 -13   3      0.41    0.09  0. 1.0000     0. 
  -6  13  -3      0.52    0.06  0. 1.0000     0. 
   6  13   3      0.42    0.06  0. 1.0000     0. 
   7 -13   3      0.68    0.11  0. 1.0000     0. 
   7 -13   3      0.72    0.10  0. 1.0000     0. 
   7 -13   3      0.48    0.09  0. 1.0000     0. 
   7  13   3      0.58    0.05  0. 1.0000     0. 
   7  14  -3      1.62    0.09  0. 1.0000     0. 
   6  14  -3      8.46    0.28  0. 1.0000     0. 
  -6  14   3      8.12    0.32  0. 1.0000     0. 
   5 -14  -3      0.34    0.06  0. 1.0000     0. 
   5  14  -3      0.40    0.06  0. 1.0000     0. 
  -5  14   3      0.37    0.08  0. 1.0000     0. 
   4  14  -3     19.40    0.62  0. 1.0000     0. 
  -4  14   3     19.03    0.66  0. 1.0000     0. 
   3  14  -3      0.75    0.08  0. 1.0000     0. 
  -3  14   3      0.71    0.11  0. 1.0000     0. 
   3  14  -3      0.71    0.09  0. 1.0000     0. 
   2  14  -3     54.41    1.82  0. 1.0000     0. 
  -2  14   3     55.99    1.72  0. 1.0000     0. 
   2  14  -3     55.83    1.64  0. 1.0000     0. 
   2  14  -3     52.29    1.70  0. 1.0000     0. 
   2  14  -3     52.56    1.82  0. 1.0000     0. 
   1  14  -3      0.21    0.06  0. 1.0000     0. 
  -1  14   3      0.15    0.06  0. 1.0000     0. 
  -1  14   3      0.04    0.07  0. 1.0000     0. 
  -1  14   3      0.13    0.07  0. 1.0000     0. 
   1  14  -3      0.18    0.07  0. 1.0000     0. 
   1  14  -3      0.16    0.07  0. 1.0000     0. 
   0  14  -3      2.82    0.16  0. 1.0000     0. 
   0  14   3      2.61    0.14  0. 1.0000     0. 
   0  14   3      2.65    0.17  0. 1.0000     0. 
   0  14   3      2.61    0.16  0. 1.0000     0. 
   0  14  -3      2.85    0.18  0. 1.0000     0. 
   1  14   3     15.83    0.51  0. 1.0000     0. 
  -1  14  -3     15.79    0.55  0. 1.0000     0. 
   1  14   3     14.55    0.52  0. 1.0000     0. 
   2  14   3      0.07    0.06  0. 1.0000     0. 
  -2  14  -3      0.17    0.08  0. 1.0000     0. 
  -3  14  -3     39.67    1.27  0. 1.0000     0. 
   3  14   3     38.44    1.19  0. 1.0000     0. 
   4 -14   3      1.06    0.09  0. 1.0000     0. 
  -4  14  -3      1.15    0.06  0. 1.0000     0. 
  -4  14  -3      1.19    0.13  0. 1.0000     0. 
   4  14   3      1.29    0.10  0. 1.0000     0. 
   5 -14   3     29.60    0.99  0. 1.0000     0. 
   5 -14   3     27.82    1.01  0. 1.0000     0. 
   5 -14   3     31.04    0.81  0. 1.0000     0. 
   5  14   3     30.95    0.91  0. 1.0000     0. 
  -5  14  -3     30.70    0.81  0. 1.0000     0. 
  -5  14  -3     29.68    0.98  0. 1.0000     0. 
   6 -14   3      1.55    0.15  0. 1.0000     0. 
   6 -14   3      1.50    0.14  0. 1.0000     0. 
   6  14   3      1.47    0.08  0. 1.0000     0. 
   6  15  -3      6.74    0.23  0. 1.0000     0. 
   5  15  -3      0.08    0.05  0. 1.0000     0. 
  -5  15   3      0.07    0.07  0. 1.0000     0. 
   4  15  -3      4.05    0.17  0. 1.0000     0. 
  -4  15   3      3.34    0.19  0. 1.0000     0. 
   3  15  -3      5.82    0.23  0. 1.0000     0. 
  -3  15   3      6.05    0.26  0. 1.0000     0. 
   2  15  -3      5.01    0.21  0. 1.0000     0. 
  -2  15   3      4.97    0.22  0. 1.0000     0. 
  -2  15   3      4.99    0.23  0. 1.0000     0. 
   2  15  -3      4.88    0.21  0. 1.0000     0. 
  -1  15   3      0.58    0.07  0. 1.0000     0. 
  -1  15   3      0.48    0.08  0. 1.0000     0. 
  -1  15   3      0.50    0.08  0. 1.0000     0. 
   0  15   3     12.54    0.45  0. 1.0000     0. 
   0  15   3     13.51    0.45  0. 1.0000     0. 
   0  15  -3     13.27    0.48  0. 1.0000     0. 
   0  15  -3     13.27    0.47  0. 1.0000     0. 
   0  15   3     12.18    0.45  0. 1.0000     0. 
   0  15   3     12.84    0.44  0. 1.0000     0. 
   0  15  -3     13.03    0.44  0. 1.0000     0. 
  -1  15  -3      8.11    0.33  0. 1.0000     0. 
   1  15   3      8.26    0.30  0. 1.0000     0. 
   1  15   3      8.13    0.30  0. 1.0000     0. 
   2  15   3     22.21    0.71  0. 1.0000     0. 
  -2  15  -3     22.43    0.75  0. 1.0000     0. 
   3  15   3      3.09    0.15  0. 1.0000     0. 
  -3  15  -3      3.26    0.19  0. 1.0000     0. 
   4 -15   3      3.13    0.13  0. 1.0000     0. 
   4  15   3      3.25    0.15  0. 1.0000     0. 
  -4  15  -3      3.39    0.19  0. 1.0000     0. 
  -5  15  -3      0.24    0.07  0. 1.0000     0. 
   5  15   3      0.19    0.05  0. 1.0000     0. 
   5  16  -3      0.02    0.04  0. 1.0000     0. 
   4  16  -3      1.58    0.10  0. 1.0000     0. 
  -4  16   3      1.70    0.12  0. 1.0000     0. 
   3  16  -3      0.16    0.06  0. 1.0000     0. 
  -3  16   3      0.17    0.05  0. 1.0000     0. 
  -3  16   3      0.20    0.07  0. 1.0000     0. 
  -2  16   3     14.34    0.50  0. 1.0000     0. 
  -2  16   3     14.25    0.49  0. 1.0000     0. 
   2  16  -3     13.99    0.47  0. 1.0000     0. 
   1  16  -3      1.96    0.13  0. 1.0000     0. 
   1  16  -3      2.02    0.12  0. 1.0000     0. 
  -1  16   3      1.89    0.13  0. 1.0000     0. 
  -1  16   3      1.96    0.13  0. 1.0000     0. 
   0  16  -3      5.49    0.21  0. 1.0000     0. 
   0  16  -3      4.92    0.22  0. 1.0000     0. 
   0  16   3      5.03    0.21  0. 1.0000     0. 
   0  16   3      4.77    0.21  0. 1.0000     0. 
  -1  16  -3      0.18    0.07  0. 1.0000     0. 
   1  16   3      0.17    0.06  0. 1.0000     0. 
  -1  16  -3      0.30    0.06  0. 1.0000     0. 
  -2  16  -3      0.98    0.10  0. 1.0000     0. 
   2  16   3      1.18    0.10  0. 1.0000     0. 
  -3  16  -3      0.22    0.07  0. 1.0000     0. 
   3  16   3      0.50    0.06  0. 1.0000     0. 
  -4  16  -3      0.56    0.08  0. 1.0000     0. 
   4  16   3      0.53    0.06  0. 1.0000     0. 
  -3  17   3      0.47    0.06  0. 1.0000     0. 
   3  17  -3      0.35    0.05  0. 1.0000     0. 
   2  17  -3      1.93    0.11  0. 1.0000     0. 
  -2  17   3      1.88    0.11  0. 1.0000     0. 
  -1  17   3      0.90    0.08  0. 1.0000     0. 
  -1  17   3      0.73    0.08  0. 1.0000     0. 
   1  17  -3      0.97    0.09  0. 1.0000     0. 
   0  17   3      1.98    0.11  0. 1.0000     0. 
   0  17  -3      1.72    0.11  0. 1.0000     0. 
   1  17   3      0.17    0.05  0. 1.0000     0. 
  -1  17  -3      0.03    0.05  0. 1.0000     0. 
   2  17   3     15.47    0.49  0. 1.0000     0. 
  -2  17  -3     15.47    0.52  0. 1.0000     0. 
  -3  17  -3      4.78    0.19  0. 1.0000     0. 
   3  17   3      4.74    0.17  0. 1.0000     0. 
  11   0  -4      4.03    0.17  0. 1.0000     0. 
  10   0  -4     15.66    0.53  0. 1.0000     0. 
 -10   0   4     16.85    0.78  0. 1.0000     0. 
   9   0  -4      6.99    0.27  0. 1.0000     0. 
   9   0  -4      6.31    0.32  0. 1.0000     0. 
   9   0  -4      6.56    0.26  0. 1.0000     0. 
  -9   0   4      6.44    0.48  0. 1.0000     0. 
  -8   0   4      0.15    0.18  0. 1.0000     0. 
   8   0  -4      0.04    0.06  0. 1.0000     0. 
   8   0  -4      0.05    0.16  0. 1.0000     0. 
   8   0  -4      0.06    0.07  0. 1.0000     0. 
   8   0  -4      0.06    0.10  0. 1.0000     0. 
  -8   0   4     -0.08    0.15  0. 1.0000     0. 
   8   0  -4      0.01    0.07  0. 1.0000     0. 
   7   0  -4      0.22    0.06  0. 1.0000     0. 
  -7   0   4      0.01    0.13  0. 1.0000     0. 
   7   0  -4      0.02    0.14  0. 1.0000     0. 
  -7   0   4      0.13    0.19  0. 1.0000     0. 
   6   0  -4     74.06    2.57  0. 1.0000     0. 
  -6   0   4     71.01    2.52  0. 1.0000     0. 
  -6   0   4     70.64    2.64  0. 1.0000     0. 
  -5   0   4     53.59    2.03  0. 1.0000     0. 
   5   0  -4     55.49    1.98  0. 1.0000     0. 
   5   0  -4     54.29    2.08  0. 1.0000     0. 
   5   0  -4     57.63    2.08  0. 1.0000     0. 
   4   0  -4    394.52   15.29  0. 1.0000     0. 
  -4   0   4    445.27   14.01  0. 1.0000     0. 
   4   0  -4    413.83   15.31  0. 1.0000     0. 
   4   0  -4    421.84   13.79  0. 1.0000     0. 
  -3   0   4    607.60   22.49  0. 1.0000     0. 
   3   0  -4    551.97   20.90  0. 1.0000     0. 
  -3   0   4    543.36   23.84  0. 1.0000     0. 
   3   0  -4    556.24   20.90  0. 1.0000     0. 
  -3   0   4    606.64   19.07  0. 1.0000     0. 
  -2   0   4     58.58    2.26  0. 1.0000     0. 
  -2   0   4     52.86    2.10  0. 1.0000     0. 
   2   0  -4     54.92    2.37  0. 1.0000     0. 
  -2   0   4     56.22    1.93  0. 1.0000     0. 
   2   0  -4     52.41    2.09  0. 1.0000     0. 
   2   0  -4     58.41    2.09  0. 1.0000     0. 
  -1   0   4     73.59    2.79  0. 1.0000     0. 
  -1   0   4     64.50    2.96  0. 1.0000     0. 
  -1   0   4     70.01    2.60  0. 1.0000     0. 
   1   0  -4     72.86    2.96  0. 1.0000     0. 
   0   0   4    279.28   10.82  0. 1.0000     0. 
   0   0  -4    273.63   10.83  0. 1.0000     0. 
   2   0   4     20.33    0.77  0. 1.0000     0. 
   4   0   4      2.98    0.24  0. 1.0000     0. 
  -4   0  -4      2.97    0.24  0. 1.0000     0. 
  -4   0  -4      3.40    0.22  0. 1.0000     0. 
   5   0   4     17.33    0.74  0. 1.0000     0. 
   6   0   4      2.79    0.28  0. 1.0000     0. 
   6   0   4      2.82    0.32  0. 1.0000     0. 
   7   0   4      1.73    0.27  0. 1.0000     0. 
   7   0   4      1.60    0.13  0. 1.0000     0. 
   8   0   4     66.24    2.04  0. 1.0000     0. 
   8   0   4     69.23    2.03  0. 1.0000     0. 
   8   0   4     70.29    2.56  0. 1.0000     0. 
  -9   0  -4      0.31    0.18  0. 1.0000     0. 
   9   0   4      0.31    0.07  0. 1.0000     0. 
   9   0   4      0.34    0.09  0. 1.0000     0. 
  10   0   4      1.14    0.11  0. 1.0000     0. 
 -10   0  -4      1.25    0.23  0. 1.0000     0. 
  11   0   4      7.69    0.27  0. 1.0000     0. 
  11   0   4      8.05    0.27  0. 1.0000     0. 
  11  -1  -4      4.09    0.18  0. 1.0000     0. 
  11  -1  -4      4.07    0.18  0. 1.0000     0. 
  11   1  -4      4.24    0.17  0. 1.0000     0. 
  10  -1  -4     31.07    0.99  0. 1.0000     0. 
 -10  -1   4     33.66    1.29  0. 1.0000     0. 
 -10   1   4     34.62    1.31  0. 1.0000     0. 
  10   1  -4     31.03    0.98  0. 1.0000     0. 
  10   1  -4     31.27    0.99  0. 1.0000     0. 
   9  -1  -4     33.93    1.13  0. 1.0000     0. 
   9  -1  -4     33.41    1.15  0. 1.0000     0. 
   9  -1  -4     31.63    1.13  0. 1.0000     0. 
  -9  -1   4     33.30    1.36  0. 1.0000     0. 
   9  -1  -4     34.53    1.04  0. 1.0000     0. 
   9  -1  -4     33.06    1.07  0. 1.0000     0. 
   9   1  -4     34.55    1.04  0. 1.0000     0. 
  -9   1   4     33.43    1.38  0. 1.0000     0. 
  -8  -1   4     26.83    1.26  0. 1.0000     0. 
   8  -1  -4     27.33    0.87  0. 1.0000     0. 
   8  -1  -4     28.21    0.91  0. 1.0000     0. 
   8  -1  -4     27.11    0.98  0. 1.0000     0. 
   8  -1  -4     30.55    1.24  0. 1.0000     0. 
  -8  -1   4     29.50    1.20  0. 1.0000     0. 
   8  -1  -4     28.71    0.98  0. 1.0000     0. 
   8   1  -4     24.97    0.95  0. 1.0000     0. 
   8   1  -4     28.46    0.95  0. 1.0000     0. 
   8   1  -4     27.31    0.97  0. 1.0000     0. 
  -8   1   4     26.19    1.26  0. 1.0000     0. 
   8   1  -4     27.39    0.90  0. 1.0000     0. 
  -8   1   4     27.98    1.20  0. 1.0000     0. 
   8   1  -4     29.20    0.87  0. 1.0000     0. 
   7  -1  -4     24.39    1.08  0. 1.0000     0. 
  -7  -1   4     24.20    1.14  0. 1.0000     0. 
  -7  -1   4     27.61    1.09  0. 1.0000     0. 
   7   1  -4     25.76    0.88  0. 1.0000     0. 
  -7   1   4     24.10    1.13  0. 1.0000     0. 
   7   1  -4     24.92    1.09  0. 1.0000     0. 
  -7   1   4     25.02    1.07  0. 1.0000     0. 
  -6  -1   4     14.49    0.74  0. 1.0000     0. 
   6  -1  -4     14.46    0.69  0. 1.0000     0. 
  -6  -1   4     14.88    0.68  0. 1.0000     0. 
  -6   1   4     15.48    0.75  0. 1.0000     0. 
   6   1  -4     13.98    0.69  0. 1.0000     0. 
  -5  -1   4     20.95    0.91  0. 1.0000     0. 
   5  -1  -4     20.91    0.87  0. 1.0000     0. 
   5  -1  -4     22.24    0.88  0. 1.0000     0. 
   5   1  -4     20.80    0.87  0. 1.0000     0. 
  -5   1   4     20.84    0.91  0. 1.0000     0. 
  -4  -1   4     10.15    0.48  0. 1.0000     0. 
   4  -1  -4      8.17    0.42  0. 1.0000     0. 
   4  -1  -4      8.78    0.43  0. 1.0000     0. 
  -4   1   4      9.13    0.47  0. 1.0000     0. 
   4   1  -4      8.86    0.41  0. 1.0000     0. 
   4   1  -4      9.18    0.40  0. 1.0000     0. 
   4   1  -4      8.61    0.43  0. 1.0000     0. 
  -3  -1   4    104.82    4.78  0. 1.0000     0. 
  -3  -1   4    117.92    4.55  0. 1.0000     0. 
   3  -1  -4    115.74    4.00  0. 1.0000     0. 
  -3   1   4    116.54    3.87  0. 1.0000     0. 
   3   1  -4    116.38    4.18  0. 1.0000     0. 
   3   1  -4    107.51    4.18  0. 1.0000     0. 
   2  -1  -4    788.01   32.23  0. 1.0000     0. 
  -2  -1   4    748.77   32.12  0. 1.0000     0. 
  -2  -1   4    805.13   30.45  0. 1.0000     0. 
  -2   1   4    754.62   28.16  0. 1.0000     0. 
  -2   1   4    813.40   25.64  0. 1.0000     0. 
   2   1  -4    707.45   28.20  0. 1.0000     0. 
   2   1  -4    780.53   28.25  0. 1.0000     0. 
  -2   1   4    787.23   32.10  0. 1.0000     0. 
  -1  -1   4     58.13    2.19  0. 1.0000     0. 
   1  -1  -4     60.77    2.50  0. 1.0000     0. 
  -1  -1   4     59.29    2.36  0. 1.0000     0. 
  -1  -1   4     63.74    2.12  0. 1.0000     0. 
  -1   1   4     59.67    2.50  0. 1.0000     0. 
  -1   1   4     55.20    2.19  0. 1.0000     0. 
   1   1  -4     59.66    2.50  0. 1.0000     0. 
   1   1  -4     55.58    2.36  0. 1.0000     0. 
   1   1  -4     57.69    2.19  0. 1.0000     0. 
   0  -1   4    152.42    5.97  0. 1.0000     0. 
   0  -1   4    144.88    5.56  0. 1.0000     0. 
   0  -1   4    163.48    5.35  0. 1.0000     0. 
   0   1  -4    147.99    5.97  0. 1.0000     0. 
   0   1   4    151.84    5.54  0. 1.0000     0. 
   1  -1   4    197.61    6.48  0. 1.0000     0. 
  -1  -1  -4    175.85    7.23  0. 1.0000     0. 
   1  -1   4    181.53    6.74  0. 1.0000     0. 
  -1   1  -4    183.78    7.24  0. 1.0000     0. 
  -2  -1  -4    963.63   37.44  0. 1.0000     0. 
   2  -1   4    909.89   31.59  0. 1.0000     0. 
   2  -1   4   1000.00   33.25  0. 1.0000     0. 
   2   1   4    936.69   31.62  0. 1.0000     0. 
  -3  -1  -4    155.71    6.00  0. 1.0000     0. 
   3  -1   4    145.66    5.31  0. 1.0000     0. 
  -3   1  -4    151.01    5.07  0. 1.0000     0. 
  -3   1  -4    151.38    6.32  0. 1.0000     0. 
  -4  -1  -4    147.12    4.83  0. 1.0000     0. 
   4  -1   4    137.38    4.78  0. 1.0000     0. 
  -4  -1  -4    143.90    5.94  0. 1.0000     0. 
  -4   1  -4    144.76    4.83  0. 1.0000     0. 
   4   1   4    137.46    4.78  0. 1.0000     0. 
   5  -1   4      4.70    0.32  0. 1.0000     0. 
   5   1   4      4.73    0.35  0. 1.0000     0. 
   5   1   4      4.57    0.32  0. 1.0000     0. 
   6  -1   4     40.72    1.55  0. 1.0000     0. 
   6   1   4     40.31    1.54  0. 1.0000     0. 
   6   1   4     39.90    1.54  0. 1.0000     0. 
   7  -1   4     21.60    0.98  0. 1.0000     0. 
   7  -1   4     21.71    0.69  0. 1.0000     0. 
   7   1   4     22.23    0.99  0. 1.0000     0. 
   7   1   4     21.87    0.70  0. 1.0000     0. 
   8  -1   4      2.24    0.14  0. 1.0000     0. 
   8  -1   4      2.25    0.16  0. 1.0000     0. 
   8  -1   4      2.42    0.35  0. 1.0000     0. 
  -8  -1  -4      1.89    0.29  0. 1.0000     0. 
   8   1   4      2.06    0.13  0. 1.0000     0. 
   8   1   4      2.21    0.17  0. 1.0000     0. 
   9  -1   4      0.15    0.07  0. 1.0000     0. 
  -9  -1  -4      0.21    0.16  0. 1.0000     0. 
   9  -1   4      0.09    0.18  0. 1.0000     0. 
  -9   1  -4      0.05    0.16  0. 1.0000     0. 
   9   1   4      0.16    0.06  0. 1.0000     0. 
  10  -1   4      1.06    0.10  0. 1.0000     0. 
 -10   1  -4      1.39    0.25  0. 1.0000     0. 
  10   1   4      1.04    0.09  0. 1.0000     0. 
  11  -1   4      1.20    0.10  0. 1.0000     0. 
  11   1   4      1.22    0.09  0. 1.0000     0. 
  11   1   4      1.07    0.08  0. 1.0000     0. 
  11  -2  -4      6.34    0.24  0. 1.0000     0. 
  11  -2  -4      6.51    0.24  0. 1.0000     0. 
  11   2  -4      6.35    0.23  0. 1.0000     0. 
  10  -2  -4      4.08    0.23  0. 1.0000     0. 
  10  -2  -4      3.79    0.18  0. 1.0000     0. 
  10   2  -4      3.60    0.18  0. 1.0000     0. 
 -10   2   4      4.24    0.38  0. 1.0000     0. 
  10   2  -4      3.67    0.18  0. 1.0000     0. 
   9  -2  -4      0.46    0.07  0. 1.0000     0. 
  -9  -2   4      0.32    0.18  0. 1.0000     0. 
   9  -2  -4      0.35    0.08  0. 1.0000     0. 
   9  -2  -4      0.38    0.06  0. 1.0000     0. 
   9  -2  -4      0.29    0.18  0. 1.0000     0. 
   9  -2  -4      0.36    0.12  0. 1.0000     0. 
   9  -2  -4      0.39    0.08  0. 1.0000     0. 
  -9   2   4      0.44    0.20  0. 1.0000     0. 
   9   2  -4      0.23    0.08  0. 1.0000     0. 
   8  -2  -4      4.16    0.20  0. 1.0000     0. 
   8  -2  -4      4.15    0.26  0. 1.0000     0. 
   8  -2  -4      3.94    0.21  0. 1.0000     0. 
   8  -2  -4      4.08    0.40  0. 1.0000     0. 
  -8  -2   4      3.68    0.46  0. 1.0000     0. 
  -8  -2   4      3.92    0.38  0. 1.0000     0. 
  -8   2   4      4.35    0.41  0. 1.0000     0. 
   8   2  -4      3.97    0.19  0. 1.0000     0. 
  -8   2   4      3.36    0.42  0. 1.0000     0. 
   8   2  -4      4.06    0.19  0. 1.0000     0. 
  -7  -2   4      2.80    0.33  0. 1.0000     0. 
  -7  -2   4      2.70    0.37  0. 1.0000     0. 
   7  -2  -4      3.23    0.34  0. 1.0000     0. 
  -7   2   4      3.49    0.38  0. 1.0000     0. 
   7   2  -4      3.27    0.15  0. 1.0000     0. 
  -7   2   4      3.62    0.38  0. 1.0000     0. 
   6  -2  -4    105.11    3.92  0. 1.0000     0. 
   6  -2  -4    104.41    2.78  0. 1.0000     0. 
  -6  -2   4    104.17    3.59  0. 1.0000     0. 
   6  -2  -4    105.93    3.68  0. 1.0000     0. 
  -6  -2   4    109.56    3.78  0. 1.0000     0. 
  -6   2   4    104.70    3.76  0. 1.0000     0. 
   5  -2  -4     12.82    0.58  0. 1.0000     0. 
   5  -2  -4     11.48    0.57  0. 1.0000     0. 
  -5  -2   4     11.51    0.61  0. 1.0000     0. 
  -5   2   4     12.51    0.62  0. 1.0000     0. 
   5   2  -4     13.26    0.60  0. 1.0000     0. 
   4  -2  -4     48.29    1.72  0. 1.0000     0. 
  -4   2   4     48.96    1.77  0. 1.0000     0. 
   4   2  -4     48.06    1.72  0. 1.0000     0. 
   3  -2  -4     68.89    2.37  0. 1.0000     0. 
  -3  -2   4     61.79    2.82  0. 1.0000     0. 
   3   2  -4     64.63    2.44  0. 1.0000     0. 
  -3   2   4     68.65    2.30  0. 1.0000     0. 
   3   2  -4     63.94    2.45  0. 1.0000     0. 
   2  -2  -4    336.45   11.34  0. 1.0000     0. 
  -2  -2   4    328.86   11.33  0. 1.0000     0. 
  -2  -2   4    327.26   12.73  0. 1.0000     0. 
   2  -2  -4    314.30   13.50  0. 1.0000     0. 
  -2  -2   4    327.24   13.49  0. 1.0000     0. 
  -2   2   4    321.80   10.79  0. 1.0000     0. 
   2   2  -4    331.15   11.83  0. 1.0000     0. 
   2   2  -4    319.05   11.83  0. 1.0000     0. 
   2   2  -4    311.55   12.73  0. 1.0000     0. 
  -2   2   4    324.62   13.50  0. 1.0000     0. 
  -2   2   4    318.21   11.85  0. 1.0000     0. 
  -1  -2   4      0.10    0.09  0. 1.0000     0. 
   1  -2  -4      0.12    0.09  0. 1.0000     0. 
  -1  -2   4      0.18    0.10  0. 1.0000     0. 
   1  -2  -4      0.18    0.07  0. 1.0000     0. 
   1   2  -4      0.15    0.08  0. 1.0000     0. 
   1   2  -4      0.08    0.08  0. 1.0000     0. 
  -1   2   4      0.12    0.08  0. 1.0000     0. 
   1   2  -4      0.09    0.09  0. 1.0000     0. 
  -1   2   4      0.13    0.07  0. 1.0000     0. 
   1   2  -4      0.10    0.08  0. 1.0000     0. 
   0  -2   4    125.98    4.76  0. 1.0000     0. 
   0  -2   4    125.25    4.26  0. 1.0000     0. 
   0  -2  -4    127.14    4.25  0. 1.0000     0. 
   0  -2  -4    117.51    5.01  0. 1.0000     0. 
   0  -2  -4    106.85    4.72  0. 1.0000     0. 
   0   2  -4    116.69    4.75  0. 1.0000     0. 
   0   2  -4    120.87    4.43  0. 1.0000     0. 
   0   2   4    119.30    4.73  0. 1.0000     0. 
   0   2   4    123.44    4.39  0. 1.0000     0. 
   1  -2   4    393.17   14.43  0. 1.0000     0. 
  -1  -2  -4    407.21   13.82  0. 1.0000     0. 
   1  -2   4    415.01   15.50  0. 1.0000     0. 
   1  -2   4    410.30   13.84  0. 1.0000     0. 
  -1  -2  -4    373.74   15.47  0. 1.0000     0. 
  -1   2  -4    376.64   15.49  0. 1.0000     0. 
   1   2   4    395.79   13.12  0. 1.0000     0. 
   1   2   4    392.66   15.47  0. 1.0000     0. 
   2  -2   4      7.55    0.36  0. 1.0000     0. 
   2  -2   4      7.40    0.34  0. 1.0000     0. 
  -2  -2  -4      8.16    0.38  0. 1.0000     0. 
  -2  -2  -4      8.24    0.34  0. 1.0000     0. 
  -2   2  -4      7.34    0.40  0. 1.0000     0. 
  -2   2  -4      7.12    0.39  0. 1.0000     0. 
   3  -2   4     52.36    1.90  0. 1.0000     0. 
   3  -2   4     50.11    1.94  0. 1.0000     0. 
  -3  -2  -4     53.33    2.15  0. 1.0000     0. 
  -3   2  -4     51.32    2.26  0. 1.0000     0. 
  -3   2  -4     53.68    1.82  0. 1.0000     0. 
   4  -2   4      2.36    0.24  0. 1.0000     0. 
  -4   2  -4      2.60    0.24  0. 1.0000     0. 
   4   2   4      2.53    0.22  0. 1.0000     0. 
   5  -2   4     80.20    2.65  0. 1.0000     0. 
   5   2   4     72.90    2.63  0. 1.0000     0. 
  -5   2  -4     71.30    2.65  0. 1.0000     0. 
   5   2   4     75.14    2.62  0. 1.0000     0. 
   6  -2   4     20.23    0.89  0. 1.0000     0. 
   6   2   4     19.61    0.88  0. 1.0000     0. 
   6   2   4     21.04    0.89  0. 1.0000     0. 
   7  -2   4     18.87    0.65  0. 1.0000     0. 
   7  -2   4     19.44    0.90  0. 1.0000     0. 
   7   2   4     18.32    0.61  0. 1.0000     0. 
   7   2   4     18.38    0.88  0. 1.0000     0. 
   8  -2   4     22.93    0.73  0. 1.0000     0. 
   8  -2   4     24.32    1.08  0. 1.0000     0. 
   8   2   4     21.85    0.71  0. 1.0000     0. 
   8   2   4     22.84    0.74  0. 1.0000     0. 
   9  -2   4      5.42    0.48  0. 1.0000     0. 
   9  -2   4      6.28    0.25  0. 1.0000     0. 
  -9   2  -4      7.13    0.50  0. 1.0000     0. 
   9   2   4      6.24    0.24  0. 1.0000     0. 
  10  -2   4      0.62    0.08  0. 1.0000     0. 
 -10   2  -4      0.36    0.19  0. 1.0000     0. 
  10   2   4      0.68    0.07  0. 1.0000     0. 
  11  -2   4      2.97    0.14  0. 1.0000     0. 
  11   2   4      3.07    0.13  0. 1.0000     0. 
  11  -3  -4      0.37    0.06  0. 1.0000     0. 
  11  -3  -4      0.21    0.06  0. 1.0000     0. 
  11   3  -4      0.23    0.06  0. 1.0000     0. 
  10  -3  -4     13.78    0.48  0. 1.0000     0. 
  10  -3  -4     14.70    0.48  0. 1.0000     0. 
  10  -3  -4     14.18    0.54  0. 1.0000     0. 
 -10   3   4     15.01    0.72  0. 1.0000     0. 
  10   3  -4     14.05    0.47  0. 1.0000     0. 
   9  -3  -4     15.70    0.53  0. 1.0000     0. 
   9  -3  -4     15.99    0.60  0. 1.0000     0. 
   9  -3  -4     15.23    0.56  0. 1.0000     0. 
   9  -3  -4     15.31    0.54  0. 1.0000     0. 
   9   3  -4     15.47    0.52  0. 1.0000     0. 
  -9   3   4     15.32    0.80  0. 1.0000     0. 
   9   3  -4     15.60    0.52  0. 1.0000     0. 
   8  -3  -4      9.56    0.59  0. 1.0000     0. 
   8  -3  -4      9.17    0.35  0. 1.0000     0. 
   8  -3  -4      9.08    0.34  0. 1.0000     0. 
   8  -3  -4      8.30    0.40  0. 1.0000     0. 
  -8  -3   4      8.23    0.53  0. 1.0000     0. 
  -8   3   4      8.59    0.57  0. 1.0000     0. 
   8   3  -4      9.16    0.33  0. 1.0000     0. 
  -7  -3   4      0.51    0.17  0. 1.0000     0. 
   7  -3  -4      0.86    0.23  0. 1.0000     0. 
  -7  -3   4      0.84    0.25  0. 1.0000     0. 
  -7   3   4      1.09    0.26  0. 1.0000     0. 
  -7   3   4      0.29    0.17  0. 1.0000     0. 
   7   3  -4      0.75    0.07  0. 1.0000     0. 
  -6  -3   4      0.03    0.12  0. 1.0000     0. 
   6  -3  -4     -0.01    0.09  0. 1.0000     0. 
   6  -3  -4     -0.07    0.12  0. 1.0000     0. 
  -6  -3   4      0.11    0.16  0. 1.0000     0. 
   6  -3  -4      0.02    0.03  0. 1.0000     0. 
  -6   3   4     -0.03    0.14  0. 1.0000     0. 
   5  -3  -4    155.72    5.25  0. 1.0000     0. 
   5  -3  -4    158.03    5.78  0. 1.0000     0. 
  -5   3   4    150.76    5.34  0. 1.0000     0. 
   4  -3  -4     10.65    0.50  0. 1.0000     0. 
  -4   3   4     10.72    0.53  0. 1.0000     0. 
  -3  -3   4     71.35    2.68  0. 1.0000     0. 
   3  -3  -4     77.83    2.71  0. 1.0000     0. 
   3   3  -4     71.15    2.76  0. 1.0000     0. 
  -3   3   4     79.50    2.62  0. 1.0000     0. 
   3   3  -4     73.69    2.77  0. 1.0000     0. 
  -2  -3   4     77.77    2.74  0. 1.0000     0. 
   2  -3  -4     74.56    3.24  0. 1.0000     0. 
  -2  -3   4     74.53    3.23  0. 1.0000     0. 
  -2  -3   4     74.23    3.07  0. 1.0000     0. 
   2  -3  -4     77.59    2.74  0. 1.0000     0. 
  -2   3   4     79.05    2.62  0. 1.0000     0. 
  -2   3   4     73.05    2.85  0. 1.0000     0. 
  -2   3   4     74.83    3.06  0. 1.0000     0. 
   2   3  -4     79.11    2.82  0. 1.0000     0. 
   2   3  -4     74.06    2.82  0. 1.0000     0. 
   2   3  -4     74.35    3.08  0. 1.0000     0. 
  -1  -3   4      0.06    0.10  0. 1.0000     0. 
   1  -3  -4      0.01    0.06  0. 1.0000     0. 
  -1  -3   4      0.05    0.10  0. 1.0000     0. 
   1  -3  -4      0.01    0.09  0. 1.0000     0. 
   1   3  -4      0.00    0.09  0. 1.0000     0. 
  -1   3   4      0.07    0.08  0. 1.0000     0. 
   1   3  -4     -0.11    0.09  0. 1.0000     0. 
  -1   3   4     -0.04    0.09  0. 1.0000     0. 
   1   3  -4      0.05    0.08  0. 1.0000     0. 
   1   3  -4      0.16    0.11  0. 1.0000     0. 
  -1   3   4     -0.02    0.08  0. 1.0000     0. 
   0  -3  -4    175.43    6.78  0. 1.0000     0. 
   0  -3   4    183.76    6.10  0. 1.0000     0. 
   0  -3   4    174.05    6.81  0. 1.0000     0. 
   0  -3  -4    178.14    6.08  0. 1.0000     0. 
   0  -3  -4    164.96    7.18  0. 1.0000     0. 
   0   3   4    167.32    6.79  0. 1.0000     0. 
   0   3  -4    170.53    6.33  0. 1.0000     0. 
   0   3  -4    172.36    7.21  0. 1.0000     0. 
   0   3  -4    165.31    6.81  0. 1.0000     0. 
   0   3   4    171.53    6.29  0. 1.0000     0. 
  -1  -3  -4    328.78   11.22  0. 1.0000     0. 
   1  -3   4    343.96   11.24  0. 1.0000     0. 
   1  -3   4    322.50   12.58  0. 1.0000     0. 
  -1  -3  -4    313.03   12.55  0. 1.0000     0. 
  -1   3  -4    299.68   12.57  0. 1.0000     0. 
   1   3   4    328.96   10.65  0. 1.0000     0. 
   1   3   4    320.71   12.55  0. 1.0000     0. 
  -1   3  -4    311.56   11.71  0. 1.0000     0. 
  -1   3  -4    311.46   13.34  0. 1.0000     0. 
   2  -3   4     30.74    1.14  0. 1.0000     0. 
  -2  -3  -4     30.88    1.24  0. 1.0000     0. 
   2  -3   4     27.51    1.14  0. 1.0000     0. 
  -2  -3  -4     28.87    1.10  0. 1.0000     0. 
  -2   3  -4     28.08    1.31  0. 1.0000     0. 
  -2   3  -4     29.22    1.26  0. 1.0000     0. 
   2   3   4     29.18    1.24  0. 1.0000     0. 
  -2   3  -4     29.74    1.06  0. 1.0000     0. 
   3  -3   4     24.31    0.99  0. 1.0000     0. 
   3  -3   4     23.65    0.94  0. 1.0000     0. 
  -3  -3  -4     25.84    1.10  0. 1.0000     0. 
   3  -3   4     25.18    0.99  0. 1.0000     0. 
  -3   3  -4     25.26    0.94  0. 1.0000     0. 
   4  -3   4    122.76    4.12  0. 1.0000     0. 
   4  -3   4    119.95    4.47  0. 1.0000     0. 
  -4   3  -4    120.91    4.15  0. 1.0000     0. 
   5  -3   4     28.40    1.13  0. 1.0000     0. 
   5   3   4     29.15    1.13  0. 1.0000     0. 
  -5   3  -4     27.49    1.12  0. 1.0000     0. 
   6  -3   4     52.21    1.97  0. 1.0000     0. 
   6   3   4     53.32    1.98  0. 1.0000     0. 
   7  -3   4      0.01    0.15  0. 1.0000     0. 
   7  -3   4      0.06    0.05  0. 1.0000     0. 
   7   3   4      0.39    0.18  0. 1.0000     0. 
   7   3   4      0.06    0.07  0. 1.0000     0. 
   8  -3   4      5.62    0.24  0. 1.0000     0. 
   8  -3   4      6.36    0.25  0. 1.0000     0. 
   8  -3   4      5.47    0.30  0. 1.0000     0. 
   8  -3   4      5.92    0.49  0. 1.0000     0. 
   8   3   4      5.63    0.23  0. 1.0000     0. 
   8   3   4      6.45    0.27  0. 1.0000     0. 
   9  -3   4     16.96    0.55  0. 1.0000     0. 
   9  -3   4     16.02    0.62  0. 1.0000     0. 
   9   3   4     16.08    0.52  0. 1.0000     0. 
  10  -3   4      7.68    0.29  0. 1.0000     0. 
  10   3   4      7.75    0.27  0. 1.0000     0. 
 -10   3  -4      8.11    0.51  0. 1.0000     0. 
  10   3   4      7.52    0.27  0. 1.0000     0. 
  11  -3   4      6.58    0.24  0. 1.0000     0. 
  11   4  -4      0.26    0.05  0. 1.0000     0. 
  10  -4  -4     10.63    0.37  0. 1.0000     0. 
  10  -4  -4      9.76    0.36  0. 1.0000     0. 
  10  -4  -4     10.30    0.42  0. 1.0000     0. 
 -10   4   4      9.97    0.57  0. 1.0000     0. 
  10   4  -4     10.30    0.35  0. 1.0000     0. 
   9  -4  -4      2.42    0.17  0. 1.0000     0. 
   9  -4  -4      2.32    0.21  0. 1.0000     0. 
   9  -4  -4      2.47    0.16  0. 1.0000     0. 
   9  -4  -4      2.76    0.16  0. 1.0000     0. 
   9   4  -4      2.41    0.15  0. 1.0000     0. 
  -9   4   4      2.90    0.36  0. 1.0000     0. 
   8  -4  -4      0.79    0.14  0. 1.0000     0. 
   8  -4  -4      0.53    0.10  0. 1.0000     0. 
   8  -4  -4      0.95    0.26  0. 1.0000     0. 
   8  -4  -4      0.72    0.10  0. 1.0000     0. 
   8   4  -4      0.75    0.09  0. 1.0000     0. 
   8   4  -4      0.86    0.10  0. 1.0000     0. 
  -8   4   4      0.59    0.21  0. 1.0000     0. 
   7  -4  -4     27.22    0.88  0. 1.0000     0. 
  -7  -4   4     24.96    1.20  0. 1.0000     0. 
   7  -4  -4     25.74    1.14  0. 1.0000     0. 
  -7   4   4     26.16    1.20  0. 1.0000     0. 
   7   4  -4     26.00    0.82  0. 1.0000     0. 
   7   4  -4     27.00    0.89  0. 1.0000     0. 
  -7   4   4     26.23    1.13  0. 1.0000     0. 
   6  -4  -4     43.57    1.70  0. 1.0000     0. 
   6  -4  -4     46.13    1.19  0. 1.0000     0. 
  -6  -4   4     43.58    1.77  0. 1.0000     0. 
  -6   4   4     43.31    1.75  0. 1.0000     0. 
   5  -4  -4      1.28    0.22  0. 1.0000     0. 
  -5   4   4      1.16    0.23  0. 1.0000     0. 
   4  -4  -4     55.44    2.00  0. 1.0000     0. 
  -4   4   4     56.97    2.05  0. 1.0000     0. 
   3  -4  -4     13.43    0.57  0. 1.0000     0. 
  -3  -4   4     12.50    0.59  0. 1.0000     0. 
   3  -4  -4     13.82    0.63  0. 1.0000     0. 
   3   4  -4     12.99    0.54  0. 1.0000     0. 
   3   4  -4     13.62    0.54  0. 1.0000     0. 
  -3   4   4     14.38    0.61  0. 1.0000     0. 
  -2  -4   4      2.45    0.23  0. 1.0000     0. 
  -2  -4   4      2.74    0.23  0. 1.0000     0. 
   2  -4  -4      2.10    0.22  0. 1.0000     0. 
  -2   4   4      2.38    0.23  0. 1.0000     0. 
   2   4  -4      2.38    0.17  0. 1.0000     0. 
  -2   4   4      2.30    0.20  0. 1.0000     0. 
   1  -4  -4      8.46    0.43  0. 1.0000     0. 
  -1  -4   4      8.24    0.44  0. 1.0000     0. 
  -1  -4   4      8.73    0.47  0. 1.0000     0. 
   1  -4  -4      8.61    0.46  0. 1.0000     0. 
  -1   4   4      9.12    0.40  0. 1.0000     0. 
   1   4  -4      8.37    0.47  0. 1.0000     0. 
  -1   4   4      8.54    0.40  0. 1.0000     0. 
   1   4  -4      8.48    0.40  0. 1.0000     0. 
  -1   4   4      8.92    0.45  0. 1.0000     0. 
   1   4  -4      8.20    0.39  0. 1.0000     0. 
   0  -4   4    441.49   17.27  0. 1.0000     0. 
   0  -4  -4    476.51   17.24  0. 1.0000     0. 
   0  -4  -4    436.63   15.40  0. 1.0000     0. 
   0  -4   4    450.01   15.42  0. 1.0000     0. 
   0  -4  -4    433.70   18.27  0. 1.0000     0. 
   0   4   4    436.08   17.24  0. 1.0000     0. 
   0   4   4    455.65   14.57  0. 1.0000     0. 
   0   4  -4    410.55   17.26  0. 1.0000     0. 
   0   4   4    437.92   16.01  0. 1.0000     0. 
   0   4  -4    417.63   16.05  0. 1.0000     0. 
  -1  -4  -4      5.43    0.31  0. 1.0000     0. 
   1  -4   4      5.49    0.34  0. 1.0000     0. 
  -1  -4  -4      5.49    0.32  0. 1.0000     0. 
   1  -4   4      5.28    0.35  0. 1.0000     0. 
  -1   4  -4      4.79    0.29  0. 1.0000     0. 
   1   4   4      5.11    0.31  0. 1.0000     0. 
  -1   4  -4      4.71    0.32  0. 1.0000     0. 
  -1   4  -4      5.21    0.32  0. 1.0000     0. 
  -2  -4  -4     31.31    1.24  0. 1.0000     0. 
  -2  -4  -4     33.12    1.38  0. 1.0000     0. 
   2  -4   4     32.73    1.28  0. 1.0000     0. 
   2   4   4     32.20    1.38  0. 1.0000     0. 
  -3  -4  -4     18.10    0.84  0. 1.0000     0. 
   3  -4   4     16.89    0.77  0. 1.0000     0. 
   3  -4   4     17.71    0.73  0. 1.0000     0. 
  -3   4  -4     18.61    0.73  0. 1.0000     0. 
   4  -4   4     -0.01    0.12  0. 1.0000     0. 
  -4   4  -4      0.00    0.12  0. 1.0000     0. 
   5  -4   4     30.60    1.22  0. 1.0000     0. 
  -5   4  -4     29.87    1.21  0. 1.0000     0. 
   5   4   4     30.85    1.22  0. 1.0000     0. 
   6  -4   4     11.63    0.65  0. 1.0000     0. 
   6   4   4     12.38    0.43  0. 1.0000     0. 
   6   4   4     13.48    0.67  0. 1.0000     0. 
   7  -4   4      1.80    0.15  0. 1.0000     0. 
   7  -4   4      1.85    0.15  0. 1.0000     0. 
   7  -4   4      1.62    0.14  0. 1.0000     0. 
   7  -4   4      1.95    0.14  0. 1.0000     0. 
   7  -4   4      1.89    0.31  0. 1.0000     0. 
   7   4   4      1.97    0.31  0. 1.0000     0. 
   7   4   4      1.99    0.15  0. 1.0000     0. 
   8  -4   4     24.25    1.11  0. 1.0000     0. 
   8  -4   4     23.81    0.74  0. 1.0000     0. 
   8  -4   4     23.04    0.80  0. 1.0000     0. 
   8  -4   4     22.08    0.83  0. 1.0000     0. 
   8  -4   4     23.38    0.76  0. 1.0000     0. 
   8  -4   4     23.08    0.80  0. 1.0000     0. 
   8   4   4     22.35    0.72  0. 1.0000     0. 
   9  -4   4      6.35    0.32  0. 1.0000     0. 
   9  -4   4      6.84    0.27  0. 1.0000     0. 
   9   4   4      6.42    0.24  0. 1.0000     0. 
   9   4   4      6.43    0.24  0. 1.0000     0. 
  10  -4   4      5.60    0.28  0. 1.0000     0. 
  10  -4   4      5.76    0.23  0. 1.0000     0. 
  10   4   4      5.62    0.16  0. 1.0000     0. 
 -10   4  -4      5.82    0.43  0. 1.0000     0. 
  10   4   4      5.62    0.21  0. 1.0000     0. 
  11  -4   4      3.99    0.16  0. 1.0000     0. 
  10  -5  -4      6.81    0.27  0. 1.0000     0. 
  10  -5  -4      7.37    0.32  0. 1.0000     0. 
  10  -5  -4      6.43    0.27  0. 1.0000     0. 
  10   5  -4      7.24    0.26  0. 1.0000     0. 
   9  -5  -4      0.87    0.10  0. 1.0000     0. 
   9  -5  -4      0.89    0.11  0. 1.0000     0. 
   9  -5  -4      0.76    0.14  0. 1.0000     0. 
   9  -5  -4      0.80    0.10  0. 1.0000     0. 
  -9   5   4      0.69    0.22  0. 1.0000     0. 
   9   5  -4      0.90    0.09  0. 1.0000     0. 
   8  -5  -4      6.44    0.29  0. 1.0000     0. 
   8  -5  -4      6.36    0.50  0. 1.0000     0. 
   8  -5  -4      6.02    0.27  0. 1.0000     0. 
   8  -5  -4      5.99    0.32  0. 1.0000     0. 
   8   5  -4      6.11    0.25  0. 1.0000     0. 
  -8   5   4      6.56    0.50  0. 1.0000     0. 
   7  -5  -4      1.16    0.15  0. 1.0000     0. 
  -7  -5   4      0.98    0.28  0. 1.0000     0. 
   7  -5  -4      0.98    0.12  0. 1.0000     0. 
   7  -5  -4      1.27    0.12  0. 1.0000     0. 
   7  -5  -4      0.98    0.25  0. 1.0000     0. 
   7   5  -4      0.91    0.09  0. 1.0000     0. 
  -7   5   4      0.99    0.29  0. 1.0000     0. 
  -7   5   4      0.50    0.20  0. 1.0000     0. 
   7   5  -4      0.99    0.10  0. 1.0000     0. 
   6  -5  -4      0.84    0.07  0. 1.0000     0. 
   6  -5  -4      0.87    0.23  0. 1.0000     0. 
  -6   5   4      1.13    0.25  0. 1.0000     0. 
   6   5  -4      0.99    0.08  0. 1.0000     0. 
   5  -5  -4     73.42    2.62  0. 1.0000     0. 
  -5   5   4     73.43    2.69  0. 1.0000     0. 
   4  -5  -4    125.12    4.18  0. 1.0000     0. 
  -4   5   4    119.66    4.26  0. 1.0000     0. 
   3  -5  -4      6.31    0.36  0. 1.0000     0. 
   3  -5  -4      5.98    0.39  0. 1.0000     0. 
  -3   5   4      6.09    0.39  0. 1.0000     0. 
   2  -5  -4      7.08    0.43  0. 1.0000     0. 
  -2  -5   4      7.95    0.44  0. 1.0000     0. 
   2   5  -4      7.50    0.36  0. 1.0000     0. 
   2   5  -4      7.71    0.36  0. 1.0000     0. 
  -2   5   4      7.88    0.41  0. 1.0000     0. 
  -2   5   4      8.21    0.42  0. 1.0000     0. 
   1  -5  -4     32.46    1.43  0. 1.0000     0. 
   1  -5  -4     31.21    1.36  0. 1.0000     0. 
  -1  -5   4     30.65    1.27  0. 1.0000     0. 
  -1  -5   4     34.40    1.41  0. 1.0000     0. 
   1  -5  -4     30.67    1.25  0. 1.0000     0. 
  -1   5   4     29.41    1.20  0. 1.0000     0. 
   1   5  -4     31.04    1.24  0. 1.0000     0. 
  -1   5   4     32.81    1.24  0. 1.0000     0. 
   0  -5  -4     96.46    4.10  0. 1.0000     0. 
   0  -5  -4    104.90    3.91  0. 1.0000     0. 
   0  -5   4    100.66    3.94  0. 1.0000     0. 
   0  -5  -4     93.74    3.51  0. 1.0000     0. 
   0  -5   4     93.34    3.54  0. 1.0000     0. 
   0   5   4     95.73    3.57  0. 1.0000     0. 
   0   5   4     93.77    3.56  0. 1.0000     0. 
   0   5  -4     99.55    3.63  0. 1.0000     0. 
   0   5   4     93.80    3.90  0. 1.0000     0. 
  -1  -5  -4      1.33    0.17  0. 1.0000     0. 
  -1  -5  -4      1.65    0.19  0. 1.0000     0. 
   1  -5   4      1.17    0.19  0. 1.0000     0. 
   1  -5   4      0.84    0.17  0. 1.0000     0. 
  -1  -5  -4      1.33    0.13  0. 1.0000     0. 
  -1   5  -4      1.40    0.17  0. 1.0000     0. 
   1   5   4      1.27    0.18  0. 1.0000     0. 
  -2  -5  -4     19.17    0.79  0. 1.0000     0. 
  -2  -5  -4     18.47    0.86  0. 1.0000     0. 
   2  -5   4     18.44    0.83  0. 1.0000     0. 
   2   5   4     17.01    0.76  0. 1.0000     0. 
   3  -5   4      9.39    0.52  0. 1.0000     0. 
   4  -5   4     91.21    3.05  0. 1.0000     0. 
   4   5   4     87.11    3.04  0. 1.0000     0. 
  -4   5  -4     81.94    3.04  0. 1.0000     0. 
   5  -5   4    118.46    4.13  0. 1.0000     0. 
  -5   5  -4    118.33    4.16  0. 1.0000     0. 
   5   5   4    120.37    4.14  0. 1.0000     0. 
   6  -5   4     87.45    3.13  0. 1.0000     0. 
   6   5   4     84.17    2.04  0. 1.0000     0. 
   6   5   4     86.62    2.54  0. 1.0000     0. 
   6   5   4     88.01    3.13  0. 1.0000     0. 
   7  -5   4      1.94    0.15  0. 1.0000     0. 
   7  -5   4      1.93    0.16  0. 1.0000     0. 
   7  -5   4      2.13    0.19  0. 1.0000     0. 
   7  -5   4      1.97    0.15  0. 1.0000     0. 
   7  -5   4      2.28    0.35  0. 1.0000     0. 
   8  -5   4     21.01    1.03  0. 1.0000     0. 
   8  -5   4     20.57    0.76  0. 1.0000     0. 
   8  -5   4     21.24    0.70  0. 1.0000     0. 
   8  -5   4     21.48    0.68  0. 1.0000     0. 
   8  -5   4     20.51    0.73  0. 1.0000     0. 
   8   5   4     19.95    0.65  0. 1.0000     0. 
   8   5   4     20.49    0.65  0. 1.0000     0. 
   9  -5   4      3.14    0.17  0. 1.0000     0. 
   9  -5   4      3.46    0.18  0. 1.0000     0. 
   9  -5   4      3.03    0.23  0. 1.0000     0. 
   9   5   4      3.18    0.15  0. 1.0000     0. 
   9   5   4      3.34    0.11  0. 1.0000     0. 
  10  -5   4     -0.03    0.09  0. 1.0000     0. 
  10  -5   4      0.12    0.06  0. 1.0000     0. 
  10   5   4      0.14    0.05  0. 1.0000     0. 
  10   5   4      0.16    0.03  0. 1.0000     0. 
  10  -6  -4      2.01    0.14  0. 1.0000     0. 
  10  -6  -4      1.90    0.17  0. 1.0000     0. 
  10   6  -4      2.12    0.12  0. 1.0000     0. 
   9  -6  -4      2.87    0.17  0. 1.0000     0. 
   9  -6  -4      2.33    0.21  0. 1.0000     0. 
   9  -6  -4      2.45    0.17  0. 1.0000     0. 
  -9   6   4      2.71    0.34  0. 1.0000     0. 
   9   6  -4      2.51    0.15  0. 1.0000     0. 
   8  -6  -4     -0.04    0.17  0. 1.0000     0. 
   8  -6  -4      0.09    0.11  0. 1.0000     0. 
   8  -6  -4     -0.06    0.08  0. 1.0000     0. 
  -8   6   4     -0.09    0.15  0. 1.0000     0. 
   8   6  -4      0.03    0.06  0. 1.0000     0. 
   7  -6  -4      6.68    0.20  0. 1.0000     0. 
   7  -6  -4      7.04    0.34  0. 1.0000     0. 
   7  -6  -4      7.65    0.53  0. 1.0000     0. 
   7  -6  -4      6.98    0.31  0. 1.0000     0. 
  -7  -6   4      6.01    0.55  0. 1.0000     0. 
   7   6  -4      6.60    0.26  0. 1.0000     0. 
  -7   6   4      6.12    0.53  0. 1.0000     0. 
  -7   6   4      6.51    0.47  0. 1.0000     0. 
   6  -6  -4      7.92    0.54  0. 1.0000     0. 
   6  -6  -4      8.44    0.27  0. 1.0000     0. 
  -6   6   4      8.12    0.57  0. 1.0000     0. 
   6   6  -4      8.97    0.31  0. 1.0000     0. 
   5  -6  -4      0.96    0.21  0. 1.0000     0. 
  -5   6   4      1.03    0.23  0. 1.0000     0. 
   4  -6  -4     23.63    0.98  0. 1.0000     0. 
  -4   6   4     24.36    1.03  0. 1.0000     0. 
   3  -6  -4     22.37    0.90  0. 1.0000     0. 
   3  -6  -4     21.64    0.99  0. 1.0000     0. 
  -3   6   4     22.01    0.93  0. 1.0000     0. 
   2  -6  -4      0.88    0.18  0. 1.0000     0. 
  -2  -6   4      1.17    0.21  0. 1.0000     0. 
   2   6  -4      1.13    0.13  0. 1.0000     0. 
  -2   6   4      0.89    0.17  0. 1.0000     0. 
  -2   6   4      1.27    0.21  0. 1.0000     0. 
  -2   6   4      1.11    0.16  0. 1.0000     0. 
   2   6  -4      0.92    0.12  0. 1.0000     0. 
   1  -6  -4     16.29    0.76  0. 1.0000     0. 
  -1  -6   4     16.46    0.78  0. 1.0000     0. 
   1   6  -4     16.07    0.69  0. 1.0000     0. 
  -1   6   4     15.75    0.69  0. 1.0000     0. 
  -1   6   4     16.38    0.69  0. 1.0000     0. 
   0  -6  -4     43.20    1.98  0. 1.0000     0. 
   0  -6  -4     48.22    1.92  0. 1.0000     0. 
   0  -6   4     46.42    1.79  0. 1.0000     0. 
   0  -6  -4     45.83    1.76  0. 1.0000     0. 
   0   6  -4     45.46    1.76  0. 1.0000     0. 
   0   6   4     45.01    1.69  0. 1.0000     0. 
   0   6   4     43.23    1.69  0. 1.0000     0. 
   0   6   4     44.01    1.69  0. 1.0000     0. 
  -1  -6  -4    101.78    4.08  0. 1.0000     0. 
   1  -6   4     92.78    3.56  0. 1.0000     0. 
  -1  -6  -4     95.43    3.53  0. 1.0000     0. 
  -1  -6  -4     92.55    3.90  0. 1.0000     0. 
   1   6   4     97.13    3.45  0. 1.0000     0. 
  -2  -6  -4     49.83    1.88  0. 1.0000     0. 
   2  -6   4     45.61    1.90  0. 1.0000     0. 
  -2  -6  -4     51.40    2.09  0. 1.0000     0. 
   2   6   4     45.69    1.81  0. 1.0000     0. 
  -3  -6  -4      1.03    0.15  0. 1.0000     0. 
  -3  -6  -4      1.00    0.14  0. 1.0000     0. 
   3  -6   4      0.78    0.20  0. 1.0000     0. 
   3   6   4      0.78    0.17  0. 1.0000     0. 
   4  -6   4     -0.03    0.14  0. 1.0000     0. 
   4   6   4     -0.11    0.12  0. 1.0000     0. 
   5  -6   4      1.71    0.29  0. 1.0000     0. 
   5  -6   4      1.85    0.09  0. 1.0000     0. 
   5   6   4      2.02    0.29  0. 1.0000     0. 
   6  -6   4      1.03    0.26  0. 1.0000     0. 
   6   6   4      0.88    0.06  0. 1.0000     0. 
   7  -6   4      0.60    0.13  0. 1.0000     0. 
   7  -6   4      0.55    0.10  0. 1.0000     0. 
   7  -6   4      0.71    0.10  0. 1.0000     0. 
   7  -6   4      0.75    0.25  0. 1.0000     0. 
   7   6   4      0.49    0.05  0. 1.0000     0. 
   8  -6   4     55.65    2.21  0. 1.0000     0. 
   8  -6   4     56.34    1.92  0. 1.0000     0. 
   8  -6   4     56.80    1.89  0. 1.0000     0. 
   8  -6   4     59.22    1.72  0. 1.0000     0. 
   8  -6   4     57.59    1.79  0. 1.0000     0. 
   8   6   4     55.00    1.35  0. 1.0000     0. 
   8   6   4     55.50    1.69  0. 1.0000     0. 
   9  -6   4     15.66    0.54  0. 1.0000     0. 
   9  -6   4     15.78    0.61  0. 1.0000     0. 
   9  -6   4     15.82    0.53  0. 1.0000     0. 
   9   6   4     16.06    0.39  0. 1.0000     0. 
   9   6   4     15.42    0.50  0. 1.0000     0. 
  10  -6   4     10.70    0.43  0. 1.0000     0. 
  10  -6   4     11.09    0.38  0. 1.0000     0. 
  10  -7  -4      1.52    0.15  0. 1.0000     0. 
  10  -7  -4      1.28    0.12  0. 1.0000     0. 
  10   7  -4      1.17    0.10  0. 1.0000     0. 
   9  -7  -4      2.49    0.16  0. 1.0000     0. 
   9  -7  -4      2.30    0.17  0. 1.0000     0. 
   9  -7  -4      2.19    0.21  0. 1.0000     0. 
  -9   7   4      2.11    0.28  0. 1.0000     0. 
   9   7  -4      2.58    0.14  0. 1.0000     0. 
   8  -7  -4      1.13    0.13  0. 1.0000     0. 
   8  -7  -4      1.31    0.17  0. 1.0000     0. 
   8   7  -4      1.33    0.12  0. 1.0000     0. 
  -8   7   4      1.70    0.28  0. 1.0000     0. 
   7  -7  -4     26.48    1.20  0. 1.0000     0. 
   7  -7  -4     26.34    0.90  0. 1.0000     0. 
   7  -7  -4     26.58    0.73  0. 1.0000     0. 
   7  -7  -4     26.79    0.90  0. 1.0000     0. 
   7  -7  -4     27.70    0.96  0. 1.0000     0. 
  -7   7   4     27.42    1.15  0. 1.0000     0. 
   7   7  -4     26.86    0.84  0. 1.0000     0. 
   6  -7  -4      1.35    0.28  0. 1.0000     0. 
   6  -7  -4      1.33    0.10  0. 1.0000     0. 
   6  -7  -4      1.43    0.14  0. 1.0000     0. 
  -6   7   4      1.13    0.27  0. 1.0000     0. 
   6   7  -4      1.35    0.11  0. 1.0000     0. 
   5  -7  -4      1.03    0.23  0. 1.0000     0. 
  -5   7   4      1.04    0.24  0. 1.0000     0. 
   5   7  -4      1.22    0.09  0. 1.0000     0. 
   4  -7  -4     55.39    2.04  0. 1.0000     0. 
  -4   7   4     55.44    2.10  0. 1.0000     0. 
   3  -7  -4     31.33    1.37  0. 1.0000     0. 
   3  -7  -4     32.17    1.24  0. 1.0000     0. 
   2  -7  -4      5.79    0.43  0. 1.0000     0. 
  -2  -7   4      5.51    0.43  0. 1.0000     0. 
   2   7  -4      6.10    0.29  0. 1.0000     0. 
  -2   7   4      6.20    0.37  0. 1.0000     0. 
  -2   7   4      5.66    0.36  0. 1.0000     0. 
   2   7  -4      5.86    0.30  0. 1.0000     0. 
   1  -7  -4     41.23    1.62  0. 1.0000     0. 
  -1  -7   4     39.44    1.63  0. 1.0000     0. 
  -1   7   4     38.32    1.52  0. 1.0000     0. 
  -1   7   4     40.67    1.56  0. 1.0000     0. 
   1   7  -4     39.14    1.55  0. 1.0000     0. 
   0  -7   4      5.32    0.44  0. 1.0000     0. 
   0  -7  -4      5.40    0.40  0. 1.0000     0. 
   0   7  -4      5.08    0.32  0. 1.0000     0. 
   0   7   4      4.80    0.32  0. 1.0000     0. 
  -1  -7  -4      3.18    0.27  0. 1.0000     0. 
  -1  -7  -4      3.11    0.33  0. 1.0000     0. 
   1  -7   4      3.23    0.36  0. 1.0000     0. 
  -2  -7  -4      5.77    0.35  0. 1.0000     0. 
  -2  -7  -4      5.16    0.40  0. 1.0000     0. 
   2  -7   4      4.96    0.43  0. 1.0000     0. 
   2   7   4      4.63    0.34  0. 1.0000     0. 
   3  -7   4     87.29    3.32  0. 1.0000     0. 
   4  -7   4     61.60    2.29  0. 1.0000     0. 
   5  -7   4     21.77    0.60  0. 1.0000     0. 
   5  -7   4     20.68    0.98  0. 1.0000     0. 
   6  -7   4     15.26    0.52  0. 1.0000     0. 
   6  -7   4     15.87    0.84  0. 1.0000     0. 
   6  -7   4     15.17    0.54  0. 1.0000     0. 
   6   7   4     14.91    0.39  0. 1.0000     0. 
   7  -7   4     13.59    0.81  0. 1.0000     0. 
   7  -7   4     14.14    0.49  0. 1.0000     0. 
   7  -7   4     14.23    0.56  0. 1.0000     0. 
   7  -7   4     14.69    0.52  0. 1.0000     0. 
   7   7   4     13.59    0.36  0. 1.0000     0. 
   8  -7   4      5.75    0.26  0. 1.0000     0. 
   8  -7   4      6.13    0.32  0. 1.0000     0. 
   8  -7   4      5.63    0.27  0. 1.0000     0. 
   8  -7   4      5.69    0.25  0. 1.0000     0. 
   8  -7   4      5.74    0.27  0. 1.0000     0. 
   8   7   4      5.69    0.17  0. 1.0000     0. 
   9  -7   4      5.51    0.24  0. 1.0000     0. 
   9  -7   4      5.40    0.30  0. 1.0000     0. 
   9  -7   4      5.69    0.25  0. 1.0000     0. 
   9   7   4      5.77    0.15  0. 1.0000     0. 
  -9   7  -4      5.13    0.42  0. 1.0000     0. 
  10  -7   4      2.32    0.14  0. 1.0000     0. 
  10  -7   4      2.21    0.19  0. 1.0000     0. 
  10  -8  -4      0.10    0.08  0. 1.0000     0. 
  10  -8  -4      0.06    0.06  0. 1.0000     0. 
  10   8  -4      0.06    0.04  0. 1.0000     0. 
   9  -8  -4      0.10    0.07  0. 1.0000     0. 
   9  -8  -4      0.11    0.08  0. 1.0000     0. 
   9  -8  -4      0.21    0.11  0. 1.0000     0. 
   9   8  -4      0.15    0.06  0. 1.0000     0. 
   8  -8  -4      4.04    0.23  0. 1.0000     0. 
   8  -8  -4      4.01    0.26  0. 1.0000     0. 
   8   8  -4      3.96    0.19  0. 1.0000     0. 
   7  -8  -4      2.45    0.20  0. 1.0000     0. 
   7  -8  -4      2.49    0.20  0. 1.0000     0. 
   7  -8  -4      2.30    0.10  0. 1.0000     0. 
   7  -8  -4      2.85    0.40  0. 1.0000     0. 
   7  -8  -4      2.42    0.22  0. 1.0000     0. 
   7   8  -4      2.61    0.16  0. 1.0000     0. 
   6  -8  -4      8.63    0.28  0. 1.0000     0. 
   6  -8  -4      8.58    0.36  0. 1.0000     0. 
   6  -8  -4      8.38    0.58  0. 1.0000     0. 
   6  -8  -4      8.45    0.38  0. 1.0000     0. 
   6   8  -4      8.33    0.32  0. 1.0000     0. 
   5  -8  -4      3.83    0.38  0. 1.0000     0. 
   5   8  -4      4.00    0.17  0. 1.0000     0. 
   4  -8  -4     19.59    0.89  0. 1.0000     0. 
   3  -8  -4      3.28    0.39  0. 1.0000     0. 
   3  -8  -4      3.45    0.32  0. 1.0000     0. 
  -3   8   4      3.30    0.30  0. 1.0000     0. 
   2  -8  -4      0.51    0.18  0. 1.0000     0. 
  -2  -8   4      0.60    0.20  0. 1.0000     0. 
  -2   8   4      0.73    0.18  0. 1.0000     0. 
  -2   8   4      0.91    0.17  0. 1.0000     0. 
   1  -8  -4     29.82    1.34  0. 1.0000     0. 
  -1  -8   4     28.78    1.34  0. 1.0000     0. 
  -1   8   4     30.30    1.22  0. 1.0000     0. 
  -1   8   4     31.73    1.22  0. 1.0000     0. 
   1   8  -4     30.92    1.23  0. 1.0000     0. 
   0  -8   4      1.90    0.30  0. 1.0000     0. 
   0  -8  -4      2.14    0.29  0. 1.0000     0. 
   0   8   4      2.35    0.24  0. 1.0000     0. 
   0   8  -4      1.87    0.22  0. 1.0000     0. 
   1  -8   4      6.60    0.51  0. 1.0000     0. 
  -1  -8  -4      7.11    0.49  0. 1.0000     0. 
   1   8   4      5.86    0.39  0. 1.0000     0. 
   2  -8   4      0.49    0.20  0. 1.0000     0. 
  -2  -8  -4      0.88    0.21  0. 1.0000     0. 
   2   8   4      0.75    0.18  0. 1.0000     0. 
   3  -8   4     -0.19    0.15  0. 1.0000     0. 
   4  -8   4      0.15    0.18  0. 1.0000     0. 
   5  -8   4     11.71    0.35  0. 1.0000     0. 
   5  -8   4     11.48    0.68  0. 1.0000     0. 
   6  -8   4      0.57    0.24  0. 1.0000     0. 
   6  -8   4      0.68    0.14  0. 1.0000     0. 
   6  -8   4      0.62    0.11  0. 1.0000     0. 
   7  -8   4      5.32    0.52  0. 1.0000     0. 
   7  -8   4      5.44    0.27  0. 1.0000     0. 
   7  -8   4      5.04    0.24  0. 1.0000     0. 
   7  -8   4      5.66    0.30  0. 1.0000     0. 
   7   8   4      5.07    0.16  0. 1.0000     0. 
   8  -8   4     23.02    0.81  0. 1.0000     0. 
   8  -8   4     24.94    0.86  0. 1.0000     0. 
   8  -8   4     24.22    0.78  0. 1.0000     0. 
   8  -8   4     24.20    0.82  0. 1.0000     0. 
   8  -8   4     23.64    0.87  0. 1.0000     0. 
   8   8   4     24.97    0.59  0. 1.0000     0. 
   9  -8   4     19.60    0.65  0. 1.0000     0. 
   9  -8   4     20.84    0.74  0. 1.0000     0. 
   9  -8   4     20.91    0.68  0. 1.0000     0. 
  10  -8   4      0.72    0.11  0. 1.0000     0. 
   9  -9  -4     30.62    0.98  0. 1.0000     0. 
   9  -9  -4     31.15    1.04  0. 1.0000     0. 
   9  -9  -4     27.98    1.05  0. 1.0000     0. 
   9   9  -4     31.79    0.92  0. 1.0000     0. 
   8  -9  -4      0.19    0.11  0. 1.0000     0. 
   8  -9  -4      0.23    0.09  0. 1.0000     0. 
   8   9  -4      0.31    0.07  0. 1.0000     0. 
   7  -9  -4      6.11    0.30  0. 1.0000     0. 
   7  -9  -4      6.03    0.19  0. 1.0000     0. 
   7  -9  -4      6.11    0.52  0. 1.0000     0. 
   7  -9  -4      6.36    0.32  0. 1.0000     0. 
   7  -9  -4      6.18    0.29  0. 1.0000     0. 
   7   9  -4      6.01    0.25  0. 1.0000     0. 
   6  -9  -4      2.02    0.21  0. 1.0000     0. 
   6  -9  -4      1.94    0.18  0. 1.0000     0. 
   6  -9  -4      2.44    0.37  0. 1.0000     0. 
   6  -9  -4      2.05    0.13  0. 1.0000     0. 
  -6   9   4      2.29    0.35  0. 1.0000     0. 
   6   9  -4      1.76    0.14  0. 1.0000     0. 
   5  -9  -4      5.88    0.48  0. 1.0000     0. 
   5   9  -4      5.77    0.22  0. 1.0000     0. 
   5   9  -4      6.17    0.25  0. 1.0000     0. 
   5   9  -4      6.28    0.22  0. 1.0000     0. 
  -5   9   4      5.58    0.49  0. 1.0000     0. 
   5   9  -4      5.83    0.25  0. 1.0000     0. 
   4  -9  -4     20.19    0.96  0. 1.0000     0. 
  -4   9   4     20.08    0.98  0. 1.0000     0. 
   4   9  -4     21.54    0.73  0. 1.0000     0. 
   3  -9  -4      8.99    0.54  0. 1.0000     0. 
   3  -9  -4      8.58    0.64  0. 1.0000     0. 
  -3   9   4      8.84    0.53  0. 1.0000     0. 
  -3   9   4      8.97    0.28  0. 1.0000     0. 
  -2  -9   4     23.20    1.15  0. 1.0000     0. 
   2  -9  -4     22.31    1.15  0. 1.0000     0. 
  -2   9   4     26.00    1.05  0. 1.0000     0. 
  -2   9   4     23.18    1.03  0. 1.0000     0. 
  -1  -9   4      6.41    0.54  0. 1.0000     0. 
   1  -9  -4      6.74    0.53  0. 1.0000     0. 
  -1   9   4      7.13    0.36  0. 1.0000     0. 
  -1   9   4      6.95    0.42  0. 1.0000     0. 
   1   9  -4      6.85    0.36  0. 1.0000     0. 
   0  -9  -4      2.54    0.33  0. 1.0000     0. 
   0  -9   4      1.91    0.32  0. 1.0000     0. 
   0   9  -4      2.85    0.25  0. 1.0000     0. 
   0   9   4      2.41    0.27  0. 1.0000     0. 
   1  -9   4     34.83    1.53  0. 1.0000     0. 
  -1  -9  -4     35.12    1.50  0. 1.0000     0. 
   1   9   4     31.69    1.34  0. 1.0000     0. 
  -2  -9  -4     41.52    1.76  0. 1.0000     0. 
   2  -9   4     40.16    1.78  0. 1.0000     0. 
   3  -9   4      0.02    0.17  0. 1.0000     0. 
   4  -9   4     36.10    1.52  0. 1.0000     0. 
   5  -9   4      2.42    0.39  0. 1.0000     0. 
   5  -9   4      2.34    0.12  0. 1.0000     0. 
   5  -9   4      2.22    0.19  0. 1.0000     0. 
   5   9   4      2.32    0.13  0. 1.0000     0. 
   6  -9   4     16.41    0.89  0. 1.0000     0. 
   6  -9   4     15.71    0.57  0. 1.0000     0. 
   6  -9   4     15.82    0.60  0. 1.0000     0. 
   6   9   4     15.14    0.50  0. 1.0000     0. 
   7  -9   4      2.55    0.39  0. 1.0000     0. 
   7  -9   4      2.77    0.20  0. 1.0000     0. 
   7  -9   4      3.43    0.24  0. 1.0000     0. 
   7   9   4      2.59    0.14  0. 1.0000     0. 
   7   9   4      2.64    0.10  0. 1.0000     0. 
   8  -9   4     19.82    0.70  0. 1.0000     0. 
   8  -9   4     21.17    0.73  0. 1.0000     0. 
   8  -9   4     19.69    0.74  0. 1.0000     0. 
   8  -9   4     19.76    0.69  0. 1.0000     0. 
   8   9   4     20.89    0.50  0. 1.0000     0. 
   9  -9   4      0.21    0.07  0. 1.0000     0. 
   9  -9   4      0.16    0.10  0. 1.0000     0. 
   9 -10  -4      0.47    0.10  0. 1.0000     0. 
   9 -10  -4      0.36    0.08  0. 1.0000     0. 
   9  10  -4      0.44    0.05  0. 1.0000     0. 
   8 -10  -4     13.27    0.50  0. 1.0000     0. 
   8 -10  -4     13.61    0.53  0. 1.0000     0. 
   8  10  -4     14.20    0.45  0. 1.0000     0. 
   7 -10  -4      3.55    0.24  0. 1.0000     0. 
   7 -10  -4      3.89    0.23  0. 1.0000     0. 
   7 -10  -4      3.57    0.23  0. 1.0000     0. 
   7  10  -4      3.27    0.17  0. 1.0000     0. 
   6 -10  -4     13.55    0.53  0. 1.0000     0. 
   6 -10  -4     13.23    0.41  0. 1.0000     0. 
   6 -10  -4     13.92    0.51  0. 1.0000     0. 
   6 -10  -4     13.43    0.76  0. 1.0000     0. 
  -6  10   4     12.12    0.76  0. 1.0000     0. 
   6  10  -4     13.15    0.45  0. 1.0000     0. 
   5 -10  -4     66.97    2.52  0. 1.0000     0. 
   5 -10  -4     64.98    2.20  0. 1.0000     0. 
  -5  10   4     65.66    2.63  0. 1.0000     0. 
   5  10  -4     68.12    2.01  0. 1.0000     0. 
  -5  10   4     68.87    2.15  0. 1.0000     0. 
   4 -10  -4     10.71    0.65  0. 1.0000     0. 
  -4  10   4     11.38    0.43  0. 1.0000     0. 
   4  10  -4     10.97    0.39  0. 1.0000     0. 
  -4  10   4     12.27    0.69  0. 1.0000     0. 
  -4  10   4     11.22    0.34  0. 1.0000     0. 
   4  10  -4     11.40    0.41  0. 1.0000     0. 
   4  10  -4     10.82    0.40  0. 1.0000     0. 
   3 -10  -4      1.77    0.30  0. 1.0000     0. 
   3  10  -4      1.82    0.13  0. 1.0000     0. 
  -3  10   4      1.73    0.28  0. 1.0000     0. 
  -3  10   4      1.83    0.10  0. 1.0000     0. 
  -2  10   4      0.23    0.04  0. 1.0000     0. 
  -2  10   4      0.22    0.15  0. 1.0000     0. 
  -1  10   4     40.32    1.62  0. 1.0000     0. 
   1  10  -4     41.09    1.08  0. 1.0000     0. 
   0  10  -4     12.45    0.37  0. 1.0000     0. 
   0  10  -4     13.67    0.63  0. 1.0000     0. 
  -1 -10  -4      4.35    0.54  0. 1.0000     0. 
  -1  10  -4      5.05    0.18  0. 1.0000     0. 
  -1  10  -4      5.27    0.38  0. 1.0000     0. 
   2  10   4      4.52    0.18  0. 1.0000     0. 
   2  10   4      4.79    0.18  0. 1.0000     0. 
   4 -10   4      8.72    0.60  0. 1.0000     0. 
   4 -10   4      7.66    0.34  0. 1.0000     0. 
   4  10   4      7.66    0.28  0. 1.0000     0. 
   5 -10   4      0.59    0.12  0. 1.0000     0. 
   5 -10   4      0.44    0.07  0. 1.0000     0. 
   5 -10   4      0.36    0.23  0. 1.0000     0. 
   5  10   4      0.34    0.06  0. 1.0000     0. 
   6 -10   4      2.87    0.23  0. 1.0000     0. 
   6 -10   4      3.35    0.22  0. 1.0000     0. 
   6 -10   4      3.20    0.44  0. 1.0000     0. 
   6  10   4      3.16    0.15  0. 1.0000     0. 
   7 -10   4      3.59    0.24  0. 1.0000     0. 
   7 -10   4      3.39    0.22  0. 1.0000     0. 
   7  10   4      3.53    0.12  0. 1.0000     0. 
   7  10   4      3.23    0.11  0. 1.0000     0. 
   7  10   4      3.36    0.15  0. 1.0000     0. 
   8 -10   4      2.70    0.20  0. 1.0000     0. 
   8 -10   4      2.91    0.19  0. 1.0000     0. 
   8 -10   4      2.69    0.18  0. 1.0000     0. 
   8 -10   4      2.79    0.16  0. 1.0000     0. 
   8  10   4      2.92    0.09  0. 1.0000     0. 
   8  10   4      2.76    0.09  0. 1.0000     0. 
   9 -10   4      1.66    0.12  0. 1.0000     0. 
   9 -10   4      1.75    0.16  0. 1.0000     0. 
   8 -11  -4      2.52    0.17  0. 1.0000     0. 
   8 -11  -4      3.09    0.20  0. 1.0000     0. 
   8  11  -4      2.61    0.13  0. 1.0000     0. 
   7 -11  -4     10.28    0.41  0. 1.0000     0. 
   7 -11  -4     10.35    0.44  0. 1.0000     0. 
   7  11  -4     10.62    0.36  0. 1.0000     0. 
  -7  11   4     11.02    0.32  0. 1.0000     0. 
   6 -11  -4      0.31    0.12  0. 1.0000     0. 
   6 -11  -4      0.20    0.10  0. 1.0000     0. 
   6 -11  -4      0.17    0.10  0. 1.0000     0. 
   6 -11  -4      0.27    0.07  0. 1.0000     0. 
   6  11  -4      0.22    0.07  0. 1.0000     0. 
  -6  11   4      0.13    0.06  0. 1.0000     0. 
   5 -11  -4      2.50    0.36  0. 1.0000     0. 
  -5  11   4      2.37    0.35  0. 1.0000     0. 
  -5  11   4      2.61    0.19  0. 1.0000     0. 
  -5  11   4      2.47    0.13  0. 1.0000     0. 
   5  11  -4      2.69    0.15  0. 1.0000     0. 
   4 -11  -4      1.12    0.28  0. 1.0000     0. 
  -4  11   4      0.83    0.24  0. 1.0000     0. 
   4  11  -4      0.90    0.10  0. 1.0000     0. 
  -4  11   4      0.95    0.08  0. 1.0000     0. 
  -4  11   4      0.73    0.12  0. 1.0000     0. 
   4  11  -4      0.87    0.09  0. 1.0000     0. 
   4  11  -4      0.91    0.07  0. 1.0000     0. 
   4  11  -4      0.94    0.07  0. 1.0000     0. 
   3 -11  -4      0.14    0.19  0. 1.0000     0. 
   3  11  -4      0.05    0.06  0. 1.0000     0. 
   3  11  -4     -0.02    0.06  0. 1.0000     0. 
  -3  11   4     -0.02    0.07  0. 1.0000     0. 
   3  11  -4      0.02    0.05  0. 1.0000     0. 
  -3  11   4     -0.01    0.04  0. 1.0000     0. 
  -2  11   4      1.05    0.06  0. 1.0000     0. 
   0  11  -4     12.03    0.34  0. 1.0000     0. 
  -1  11  -4      3.40    0.13  0. 1.0000     0. 
   1  11   4      3.17    0.16  0. 1.0000     0. 
  -2  11  -4      0.15    0.05  0. 1.0000     0. 
   3  11   4      1.53    0.11  0. 1.0000     0. 
  -3  11  -4      1.63    0.16  0. 1.0000     0. 
   4 -11   4      8.16    0.36  0. 1.0000     0. 
   4 -11   4      8.98    0.64  0. 1.0000     0. 
   4  11   4      8.74    0.30  0. 1.0000     0. 
   5 -11   4      0.14    0.10  0. 1.0000     0. 
   5 -11   4      0.06    0.20  0. 1.0000     0. 
   5 -11   4      0.07    0.06  0. 1.0000     0. 
   5  11   4      0.03    0.05  0. 1.0000     0. 
   6 -11   4      0.17    0.10  0. 1.0000     0. 
   6 -11   4      0.13    0.11  0. 1.0000     0. 
   6  11   4      0.15    0.05  0. 1.0000     0. 
   7 -11   4      2.80    0.21  0. 1.0000     0. 
   7 -11   4      2.72    0.19  0. 1.0000     0. 
   7  11   4      2.47    0.09  0. 1.0000     0. 
   7  11   4      2.46    0.12  0. 1.0000     0. 
   7  11   4      2.41    0.09  0. 1.0000     0. 
   8 -11   4      0.55    0.07  0. 1.0000     0. 
   8 -11   4      0.63    0.09  0. 1.0000     0. 
   8 -11   4      0.65    0.12  0. 1.0000     0. 
   9 -11   4      0.66    0.10  0. 1.0000     0. 
   8 -12  -4      3.12    0.18  0. 1.0000     0. 
   8 -12  -4      3.15    0.17  0. 1.0000     0. 
   8  12  -4      3.05    0.13  0. 1.0000     0. 
   7 -12  -4      5.27    0.26  0. 1.0000     0. 
   7 -12  -4      4.84    0.25  0. 1.0000     0. 
  -7  12   4      5.41    0.17  0. 1.0000     0. 
   7  12  -4      5.45    0.21  0. 1.0000     0. 
   6 -12  -4      9.27    0.39  0. 1.0000     0. 
   6 -12  -4      9.23    0.38  0. 1.0000     0. 
   6 -12  -4      9.45    0.29  0. 1.0000     0. 
   6  12  -4      8.66    0.32  0. 1.0000     0. 
  -6  12   4      9.19    0.28  0. 1.0000     0. 
  -6  12   4      8.81    0.37  0. 1.0000     0. 
  -5  12   4      9.75    0.38  0. 1.0000     0. 
  -5  12   4      8.71    0.28  0. 1.0000     0. 
   5  12  -4      9.75    0.34  0. 1.0000     0. 
  -4  12   4      0.76    0.11  0. 1.0000     0. 
   4  12  -4      0.45    0.08  0. 1.0000     0. 
   4  12  -4      0.44    0.07  0. 1.0000     0. 
   3 -12  -4      0.87    0.26  0. 1.0000     0. 
  -3  12   4      0.64    0.05  0. 1.0000     0. 
  -3  12   4      0.56    0.10  0. 1.0000     0. 
   3  12  -4      0.70    0.09  0. 1.0000     0. 
   3  12  -4      0.61    0.08  0. 1.0000     0. 
   2  12  -4     27.11    0.83  0. 1.0000     0. 
   2  12  -4     26.50    0.93  0. 1.0000     0. 
   2  12  -4     25.56    0.87  0. 1.0000     0. 
  -2  12   4     26.84    0.88  0. 1.0000     0. 
  -2  12   4     25.99    0.83  0. 1.0000     0. 
   1  12  -4     30.51    0.94  0. 1.0000     0. 
  -1  12   4     30.33    0.99  0. 1.0000     0. 
  -1  12   4     29.09    0.94  0. 1.0000     0. 
   1  12  -4     30.40    0.99  0. 1.0000     0. 
   0  12   4     58.89    2.03  0. 1.0000     0. 
   0  12  -4     57.22    1.80  0. 1.0000     0. 
   0  12   4     60.84    1.88  0. 1.0000     0. 
   0  12   4     61.30    1.80  0. 1.0000     0. 
   0  12  -4     60.95    1.89  0. 1.0000     0. 
   1  12   4     15.40    0.54  0. 1.0000     0. 
   1  12   4     14.96    0.50  0. 1.0000     0. 
  -1  12  -4     15.05    0.42  0. 1.0000     0. 
  -1  12  -4     14.52    0.54  0. 1.0000     0. 
   1  12   4     14.86    0.52  0. 1.0000     0. 
  -2  12  -4      0.35    0.06  0. 1.0000     0. 
  -2  12  -4      0.44    0.10  0. 1.0000     0. 
   2  12   4      0.44    0.07  0. 1.0000     0. 
   3  12   4     31.10    0.95  0. 1.0000     0. 
  -3  12  -4     31.59    0.86  0. 1.0000     0. 
  -3  12  -4     29.74    1.02  0. 1.0000     0. 
   4 -12   4      0.27    0.23  0. 1.0000     0. 
   4  12   4      0.10    0.05  0. 1.0000     0. 
   5 -12   4      1.96    0.20  0. 1.0000     0. 
   5 -12   4      1.95    0.12  0. 1.0000     0. 
   5 -12   4      2.17    0.20  0. 1.0000     0. 
   5  12   4      2.44    0.13  0. 1.0000     0. 
   6 -12   4      2.97    0.22  0. 1.0000     0. 
   6 -12   4      3.14    0.21  0. 1.0000     0. 
   6  12   4      3.21    0.14  0. 1.0000     0. 
   7 -12   4      2.41    0.19  0. 1.0000     0. 
   7 -12   4      2.31    0.17  0. 1.0000     0. 
   7 -12   4      2.35    0.17  0. 1.0000     0. 
   7  12   4      2.36    0.08  0. 1.0000     0. 
   7  12   4      2.58    0.11  0. 1.0000     0. 
   7  12   4      2.56    0.08  0. 1.0000     0. 
   8 -12   4      0.08    0.06  0. 1.0000     0. 
   8 -12   4     -0.03    0.08  0. 1.0000     0. 
   7 -13  -4      1.41    0.13  0. 1.0000     0. 
   6 -13  -4      0.32    0.05  0. 1.0000     0. 
  -6  13   4      0.30    0.08  0. 1.0000     0. 
   6  13  -4      0.14    0.05  0. 1.0000     0. 
   5  13  -4      1.19    0.11  0. 1.0000     0. 
  -5  13   4      1.32    0.13  0. 1.0000     0. 
   4  13  -4      2.57    0.15  0. 1.0000     0. 
  -4  13   4      2.74    0.19  0. 1.0000     0. 
   3  13  -4      2.19    0.11  0. 1.0000     0. 
   3  13  -4      2.13    0.14  0. 1.0000     0. 
  -3  13   4      1.74    0.17  0. 1.0000     0. 
   3  13  -4      1.73    0.14  0. 1.0000     0. 
   3  13  -4      2.26    0.11  0. 1.0000     0. 
  -2  13   4      0.17    0.08  0. 1.0000     0. 
   2  13  -4      0.11    0.06  0. 1.0000     0. 
  -2  13   4      0.11    0.07  0. 1.0000     0. 
   2  13  -4      0.08    0.06  0. 1.0000     0. 
   2  13  -4      0.15    0.07  0. 1.0000     0. 
   1  13  -4      0.10    0.07  0. 1.0000     0. 
   1  13  -4      0.18    0.07  0. 1.0000     0. 
  -1  13   4      0.12    0.06  0. 1.0000     0. 
  -1  13   4      0.21    0.08  0. 1.0000     0. 
   0  13  -4      7.82    0.31  0. 1.0000     0. 
   0  13   4      7.18    0.29  0. 1.0000     0. 
   0  13   4      7.11    0.29  0. 1.0000     0. 
   0  13   4      7.11    0.28  0. 1.0000     0. 
   0  13  -4      7.17    0.29  0. 1.0000     0. 
   1  13   4      0.20    0.05  0. 1.0000     0. 
   1  13   4      0.16    0.04  0. 1.0000     0. 
   1  13   4      0.04    0.06  0. 1.0000     0. 
   1  13   4      0.13    0.06  0. 1.0000     0. 
  -1  13  -4      0.12    0.08  0. 1.0000     0. 
  -2  13  -4      5.79    0.19  0. 1.0000     0. 
  -2  13  -4      6.01    0.28  0. 1.0000     0. 
   2  13   4      5.95    0.24  0. 1.0000     0. 
   3 -13   4      4.45    0.51  0. 1.0000     0. 
  -3  13  -4      4.67    0.24  0. 1.0000     0. 
  -3  13  -4      4.30    0.16  0. 1.0000     0. 
   3  13   4      4.56    0.19  0. 1.0000     0. 
   4 -13   4      7.06    0.24  0. 1.0000     0. 
   4  13   4      7.21    0.26  0. 1.0000     0. 
  -4  13  -4      7.04    0.31  0. 1.0000     0. 
  -4  13  -4      6.72    0.23  0. 1.0000     0. 
   5 -13   4     20.79    0.56  0. 1.0000     0. 
   5 -13   4     19.16    0.69  0. 1.0000     0. 
   5 -13   4     19.54    0.72  0. 1.0000     0. 
   5  13   4     19.65    0.62  0. 1.0000     0. 
  -5  13  -4     20.30    0.57  0. 1.0000     0. 
   6 -13   4      1.38    0.14  0. 1.0000     0. 
   6 -13   4      1.22    0.13  0. 1.0000     0. 
   6  13   4      1.32    0.09  0. 1.0000     0. 
  -6  13  -4      1.13    0.08  0. 1.0000     0. 
   6  13   4      1.08    0.07  0. 1.0000     0. 
   7 -13   4      1.51    0.14  0. 1.0000     0. 
   7 -13   4      2.02    0.14  0. 1.0000     0. 
   7 -13   4      1.69    0.16  0. 1.0000     0. 
   6  14  -4      0.03    0.04  0. 1.0000     0. 
  -6  14   4      0.01    0.07  0. 1.0000     0. 
   5 -14  -4      0.19    0.06  0. 1.0000     0. 
  -5  14   4      0.26    0.08  0. 1.0000     0. 
   5  14  -4      0.18    0.05  0. 1.0000     0. 
   4  14  -4      0.12    0.06  0. 1.0000     0. 
  -4  14   4      0.22    0.08  0. 1.0000     0. 
  -3  14   4      0.24    0.09  0. 1.0000     0. 
   2  14  -4      2.04    0.15  0. 1.0000     0. 
  -2  14   4      2.94    0.18  0. 1.0000     0. 
   2  14  -4      2.15    0.14  0. 1.0000     0. 
   2  14  -4      2.17    0.12  0. 1.0000     0. 
   1  14  -4      9.87    0.38  0. 1.0000     0. 
  -1  14   4      9.64    0.37  0. 1.0000     0. 
   1  14  -4      9.77    0.38  0. 1.0000     0. 
  -1  14   4      9.47    0.38  0. 1.0000     0. 
  -1  14   4      9.90    0.36  0. 1.0000     0. 
   1  14  -4      9.94    0.35  0. 1.0000     0. 
   0  14  -4      5.65    0.26  0. 1.0000     0. 
   0  14   4      5.83    0.25  0. 1.0000     0. 
   0  14   4      5.58    0.24  0. 1.0000     0. 
   0  14   4      5.40    0.23  0. 1.0000     0. 
   0  14  -4      5.45    0.24  0. 1.0000     0. 
   1  14   4      1.36    0.13  0. 1.0000     0. 
   1  14   4      1.36    0.12  0. 1.0000     0. 
  -1  14  -4      1.71    0.16  0. 1.0000     0. 
   2  14   4      0.02    0.06  0. 1.0000     0. 
  -2  14  -4      0.11    0.08  0. 1.0000     0. 
  -3  14  -4      0.83    0.11  0. 1.0000     0. 
   4 -14   4      0.06    0.05  0. 1.0000     0. 
  -4  14  -4      0.05    0.04  0. 1.0000     0. 
  -4  14  -4      0.04    0.08  0. 1.0000     0. 
   4  14   4      0.04    0.05  0. 1.0000     0. 
   5 -14   4      2.15    0.18  0. 1.0000     0. 
   5 -14   4      2.37    0.18  0. 1.0000     0. 
   5 -14   4      2.70    0.10  0. 1.0000     0. 
  -5  14  -4      2.39    0.18  0. 1.0000     0. 
  -5  14  -4      2.58    0.10  0. 1.0000     0. 
   5  14   4      3.07    0.13  0. 1.0000     0. 
   6 -14   4      5.89    0.26  0. 1.0000     0. 
   6 -14   4      6.10    0.27  0. 1.0000     0. 
   6  14   4      5.90    0.20  0. 1.0000     0. 
   6  15  -4      0.30    0.05  0. 1.0000     0. 
  -5  15   4      0.78    0.09  0. 1.0000     0. 
   5  15  -4      0.97    0.08  0. 1.0000     0. 
   4  15  -4     27.41    0.84  0. 1.0000     0. 
  -4  15   4     27.47    0.90  0. 1.0000     0. 
   3  15  -4      0.45    0.07  0. 1.0000     0. 
  -3  15   4      0.53    0.09  0. 1.0000     0. 
  -2  15   4      0.32    0.07  0. 1.0000     0. 
  -2  15   4      0.29    0.08  0. 1.0000     0. 
   2  15  -4      0.28    0.07  0. 1.0000     0. 
   2  15  -4      0.25    0.07  0. 1.0000     0. 
   1  15  -4      4.23    0.20  0. 1.0000     0. 
   1  15  -4      4.80    0.20  0. 1.0000     0. 
   1  15  -4      4.38    0.21  0. 1.0000     0. 
  -1  15   4      4.66    0.21  0. 1.0000     0. 
  -1  15   4      4.70    0.20  0. 1.0000     0. 
  -1  15   4      4.15    0.21  0. 1.0000     0. 
   0  15  -4     12.16    0.46  0. 1.0000     0. 
   0  15  -4     13.03    0.48  0. 1.0000     0. 
   0  15   4     12.44    0.44  0. 1.0000     0. 
   0  15   4     12.79    0.43  0. 1.0000     0. 
  -1  15  -4      2.65    0.18  0. 1.0000     0. 
   1  15   4      2.52    0.15  0. 1.0000     0. 
  -2  15  -4      4.64    0.23  0. 1.0000     0. 
   2  15   4      5.08    0.21  0. 1.0000     0. 
  -3  15  -4      9.28    0.37  0. 1.0000     0. 
   3  15   4      9.40    0.32  0. 1.0000     0. 
   4 -15   4      1.59    0.09  0. 1.0000     0. 
   4  15   4      1.57    0.10  0. 1.0000     0. 
  -4  15  -4      1.46    0.14  0. 1.0000     0. 
  -5  15  -4     10.11    0.37  0. 1.0000     0. 
   5  15   4     10.33    0.33  0. 1.0000     0. 
  -4  16   4      1.15    0.11  0. 1.0000     0. 
   4  16  -4      1.13    0.09  0. 1.0000     0. 
   3  16  -4      1.42    0.11  0. 1.0000     0. 
  -3  16   4      1.64    0.13  0. 1.0000     0. 
  -3  16   4      1.49    0.10  0. 1.0000     0. 
  -2  16   4      0.56    0.06  0. 1.0000     0. 
   2  16  -4      0.46    0.07  0. 1.0000     0. 
   2  16  -4      0.43    0.06  0. 1.0000     0. 
  -2  16   4      0.61    0.08  0. 1.0000     0. 
  -1  16   4      0.31    0.06  0. 1.0000     0. 
  -1  16   4      0.20    0.07  0. 1.0000     0. 
   1  16  -4      0.14    0.06  0. 1.0000     0. 
   1  16  -4      0.28    0.06  0. 1.0000     0. 
   0  16   4      2.12    0.13  0. 1.0000     0. 
   0  16   4      2.23    0.13  0. 1.0000     0. 
   0  16  -4      2.35    0.15  0. 1.0000     0. 
   0  16  -4      2.36    0.12  0. 1.0000     0. 
   1  16   4      6.93    0.26  0. 1.0000     0. 
  -1  16  -4      6.73    0.28  0. 1.0000     0. 
  -1  16  -4      7.28    0.29  0. 1.0000     0. 
   2  16   4      0.16    0.06  0. 1.0000     0. 
  -2  16  -4      0.43    0.08  0. 1.0000     0. 
  -3  16  -4      0.57    0.09  0. 1.0000     0. 
   3  16   4      0.56    0.06  0. 1.0000     0. 
  -4  16  -4      6.01    0.24  0. 1.0000     0. 
   4  16   4      5.78    0.21  0. 1.0000     0. 
  -3  17   4      0.57    0.06  0. 1.0000     0. 
   3  17  -4      0.81    0.07  0. 1.0000     0. 
   2  17  -4      0.06    0.05  0. 1.0000     0. 
  -2  17   4      0.17    0.05  0. 1.0000     0. 
  -1  17   4      0.36    0.06  0. 1.0000     0. 
   1  17  -4      0.42    0.06  0. 1.0000     0. 
  -1  17   4      0.31    0.05  0. 1.0000     0. 
   1  17  -4      0.42    0.06  0. 1.0000     0. 
   0  17   4      1.17    0.09  0. 1.0000     0. 
   0  17  -4      1.00    0.10  0. 1.0000     0. 
   1  17   4      0.72    0.07  0. 1.0000     0. 
  -1  17  -4      0.94    0.09  0. 1.0000     0. 
  -2  17  -4     12.04    0.42  0. 1.0000     0. 
   2  17   4     12.20    0.39  0. 1.0000     0. 
  -3  17  -4      3.73    0.17  0. 1.0000     0. 
   3  17   4      3.84    0.15  0. 1.0000     0. 
  11   0  -5      0.00    0.05  0. 1.0000     0. 
  10   0  -5      0.02    0.06  0. 1.0000     0. 
 -10   0   5     -0.20    0.14  0. 1.0000     0. 
   9   0  -5     -0.07    0.09  0. 1.0000     0. 
  -9   0   5      0.03    0.15  0. 1.0000     0. 
   9   0  -5      0.00    0.06  0. 1.0000     0. 
   9   0  -5     -0.10    0.06  0. 1.0000     0. 
   8   0  -5      0.13    0.10  0. 1.0000     0. 
  -8   0   5     -0.11    0.14  0. 1.0000     0. 
  -8   0   5     -0.11    0.16  0. 1.0000     0. 
   8   0  -5     -0.10    0.06  0. 1.0000     0. 
   8   0  -5      0.09    0.07  0. 1.0000     0. 
   8   0  -5      0.12    0.07  0. 1.0000     0. 
  -7   0   5     -0.09    0.15  0. 1.0000     0. 
   7   0  -5     -0.16    0.12  0. 1.0000     0. 
  -7   0   5      0.13    0.15  0. 1.0000     0. 
  -6   0   5      0.06    0.15  0. 1.0000     0. 
   6   0  -5      0.03    0.12  0. 1.0000     0. 
  -6   0   5     -0.04    0.12  0. 1.0000     0. 
   5   0  -5      0.06    0.12  0. 1.0000     0. 
  -5   0   5      0.04    0.13  0. 1.0000     0. 
   5   0  -5      0.04    0.09  0. 1.0000     0. 
  -4   0   5     -0.01    0.12  0. 1.0000     0. 
   4   0  -5      0.08    0.09  0. 1.0000     0. 
   4   0  -5     -0.01    0.10  0. 1.0000     0. 
   3   0  -5     -0.12    0.07  0. 1.0000     0. 
  -3   0   5      0.05    0.10  0. 1.0000     0. 
  -3   0   5     -0.08    0.09  0. 1.0000     0. 
  -2   0   5      0.00    0.09  0. 1.0000     0. 
   2   0  -5     -0.03    0.09  0. 1.0000     0. 
  -2   0   5     -0.11    0.08  0. 1.0000     0. 
   2   0  -5     -0.15    0.08  0. 1.0000     0. 
  -2   0   5     -0.04    0.07  0. 1.0000     0. 
  -2   0   5     -0.05    0.09  0. 1.0000     0. 
  -1   0   5     -0.13    0.06  0. 1.0000     0. 
  -1   0   5     -0.15    0.05  0. 1.0000     0. 
  -1   0   5     -0.10    0.08  0. 1.0000     0. 
   1   0  -5     -0.15    0.07  0. 1.0000     0. 
   0   0  -5      0.09    0.03  0. 1.0000     0. 
   0   0   5      0.00    0.03  0. 1.0000     0. 
  -1   0  -5      0.59    0.07  0. 1.0000     0. 
   2   0   5      0.12    0.10  0. 1.0000     0. 
  -4   0  -5     -0.01    0.08  0. 1.0000     0. 
   4   0   5     -0.10    0.10  0. 1.0000     0. 
   5   0   5     -0.05    0.11  0. 1.0000     0. 
   6   0   5      0.05    0.13  0. 1.0000     0. 
   6   0   5      0.07    0.12  0. 1.0000     0. 
   7   0   5     -0.04    0.14  0. 1.0000     0. 
   7   0   5     -0.04    0.06  0. 1.0000     0. 
   8   0   5      0.18    0.06  0. 1.0000     0. 
   8   0   5      0.11    0.08  0. 1.0000     0. 
   8   0   5      0.02    0.17  0. 1.0000     0. 
  -9   0  -5     -0.09    0.14  0. 1.0000     0. 
   9   0   5     -0.04    0.07  0. 1.0000     0. 
   9   0   5      0.02    0.05  0. 1.0000     0. 
  10   0   5     -0.02    0.05  0. 1.0000     0. 
 -10   0  -5     -0.17    0.13  0. 1.0000     0. 
  11   0   5     -0.02    0.04  0. 1.0000     0. 
  11  -1  -5      1.05    0.10  0. 1.0000     0. 
  11  -1  -5      0.95    0.08  0. 1.0000     0. 
  11   1  -5      1.08    0.10  0. 1.0000     0. 
 -10  -1   5      7.09    0.47  0. 1.0000     0. 
  10  -1  -5      7.03    0.27  0. 1.0000     0. 
  10   1  -5      7.02    0.27  0. 1.0000     0. 
  10   1  -5      7.22    0.27  0. 1.0000     0. 
 -10   1   5      6.82    0.47  0. 1.0000     0. 
  -9  -1   5     -0.15    0.14  0. 1.0000     0. 
   9  -1  -5      0.11    0.10  0. 1.0000     0. 
   9  -1  -5     -0.01    0.06  0. 1.0000     0. 
   9  -1  -5      0.04    0.07  0. 1.0000     0. 
   9  -1  -5      0.02    0.04  0. 1.0000     0. 
   9  -1  -5      0.05    0.05  0. 1.0000     0. 
  -9   1   5      0.11    0.16  0. 1.0000     0. 
   9   1  -5      0.06    0.06  0. 1.0000     0. 
   9   1  -5      0.01    0.06  0. 1.0000     0. 
  -8  -1   5      1.86    0.35  0. 1.0000     0. 
   8  -1  -5      2.71    0.16  0. 1.0000     0. 
   8  -1  -5      2.58    0.21  0. 1.0000     0. 
  -8  -1   5      2.42    0.32  0. 1.0000     0. 
   8  -1  -5      2.52    0.16  0. 1.0000     0. 
   8  -1  -5      2.83    0.35  0. 1.0000     0. 
   8  -1  -5      2.48    0.17  0. 1.0000     0. 
   8   1  -5      2.54    0.14  0. 1.0000     0. 
  -8   1   5      2.44    0.37  0. 1.0000     0. 
   8   1  -5      2.35    0.16  0. 1.0000     0. 
   8   1  -5      2.62    0.20  0. 1.0000     0. 
  -8   1   5      2.82    0.36  0. 1.0000     0. 
   8   1  -5      2.69    0.16  0. 1.0000     0. 
  -7  -1   5      4.45    0.44  0. 1.0000     0. 
   7  -1  -5      4.79    0.39  0. 1.0000     0. 
  -7  -1   5      5.07    0.40  0. 1.0000     0. 
  -7   1   5      5.08    0.44  0. 1.0000     0. 
   7   1  -5      5.00    0.22  0. 1.0000     0. 
  -7   1   5      5.63    0.42  0. 1.0000     0. 
  -6  -1   5      0.49    0.19  0. 1.0000     0. 
  -6  -1   5      0.60    0.18  0. 1.0000     0. 
   6  -1  -5      0.71    0.19  0. 1.0000     0. 
  -6   1   5      0.61    0.20  0. 1.0000     0. 
  -6   1   5      0.70    0.17  0. 1.0000     0. 
   6   1  -5      0.69    0.18  0. 1.0000     0. 
   5  -1  -5      0.81    0.17  0. 1.0000     0. 
  -5  -1   5      0.77    0.19  0. 1.0000     0. 
   5  -1  -5      0.77    0.14  0. 1.0000     0. 
   5   1  -5      0.87    0.18  0. 1.0000     0. 
  -5   1   5      0.50    0.18  0. 1.0000     0. 
  -4  -1   5     43.08    1.56  0. 1.0000     0. 
   4  -1  -5     41.78    1.64  0. 1.0000     0. 
   4  -1  -5     39.75    1.50  0. 1.0000     0. 
   4   1  -5     41.26    1.50  0. 1.0000     0. 
   4   1  -5     41.25    1.60  0. 1.0000     0. 
  -4   1   5     43.54    1.56  0. 1.0000     0. 
   4   1  -5     42.39    1.62  0. 1.0000     0. 
  -3  -1   5      9.23    0.49  0. 1.0000     0. 
   3  -1  -5      8.80    0.39  0. 1.0000     0. 
   3   1  -5      8.54    0.41  0. 1.0000     0. 
  -3   1   5      9.01    0.42  0. 1.0000     0. 
   3   1  -5      9.05    0.42  0. 1.0000     0. 
   2  -1  -5    238.23   10.12  0. 1.0000     0. 
  -2  -1   5    230.97    8.89  0. 1.0000     0. 
  -2  -1   5    254.96    9.55  0. 1.0000     0. 
   2   1  -5    237.26   10.10  0. 1.0000     0. 
   2   1  -5    259.77    8.88  0. 1.0000     0. 
  -2   1   5    242.51    8.10  0. 1.0000     0. 
   2   1  -5    230.16    8.88  0. 1.0000     0. 
  -2   1   5    243.07   10.12  0. 1.0000     0. 
  -2   1   5    242.81    8.88  0. 1.0000     0. 
   1  -1  -5    139.95    5.64  0. 1.0000     0. 
  -1  -1   5    144.43    4.76  0. 1.0000     0. 
  -1  -1   5    135.55    5.31  0. 1.0000     0. 
  -1  -1   5    134.09    4.95  0. 1.0000     0. 
   1   1  -5    135.42    4.95  0. 1.0000     0. 
   1   1  -5    136.62    5.64  0. 1.0000     0. 
  -1   1   5    131.99    4.95  0. 1.0000     0. 
   1   1  -5    132.85    5.31  0. 1.0000     0. 
  -1   1   5    120.47    5.63  0. 1.0000     0. 
   0  -1   5     85.64    3.30  0. 1.0000     0. 
   0  -1   5     92.38    3.19  0. 1.0000     0. 
   0  -1   5     94.00    3.55  0. 1.0000     0. 
   0   1   5     88.87    3.28  0. 1.0000     0. 
   0   1  -5     87.36    3.54  0. 1.0000     0. 
  -1  -1  -5      3.51    0.18  0. 1.0000     0. 
   1  -1   5      4.17    0.23  0. 1.0000     0. 
   1  -1   5      3.95    0.18  0. 1.0000     0. 
   1   1   5      3.61    0.23  0. 1.0000     0. 
  -1   1  -5      4.03    0.22  0. 1.0000     0. 
  -2  -1  -5    348.90   13.78  0. 1.0000     0. 
   2  -1   5    342.76   11.68  0. 1.0000     0. 
   2  -1   5    371.96   12.30  0. 1.0000     0. 
   2   1   5    352.52   11.70  0. 1.0000     0. 
  -2   1  -5    342.00   13.79  0. 1.0000     0. 
  -3  -1  -5      2.62    0.22  0. 1.0000     0. 
   4  -1   5     12.53    0.55  0. 1.0000     0. 
   4   1   5     11.76    0.54  0. 1.0000     0. 
   5  -1   5      0.82    0.17  0. 1.0000     0. 
   5   1   5      1.08    0.19  0. 1.0000     0. 
   5   1   5      1.10    0.20  0. 1.0000     0. 
   6  -1   5      2.03    0.27  0. 1.0000     0. 
   6   1   5      1.63    0.24  0. 1.0000     0. 
   6   1   5      2.02    0.27  0. 1.0000     0. 
   7  -1   5      2.29    0.15  0. 1.0000     0. 
   7  -1   5      2.99    0.35  0. 1.0000     0. 
   7   1   5      2.49    0.32  0. 1.0000     0. 
   7   1   5      2.93    0.31  0. 1.0000     0. 
   7   1   5      1.94    0.15  0. 1.0000     0. 
   8  -1   5      3.81    0.18  0. 1.0000     0. 
   8  -1   5      3.56    0.20  0. 1.0000     0. 
   8  -1   5      3.85    0.39  0. 1.0000     0. 
   8   1   5      3.69    0.17  0. 1.0000     0. 
   8   1   5      3.77    0.21  0. 1.0000     0. 
   9  -1   5      0.16    0.18  0. 1.0000     0. 
   9  -1   5      0.22    0.08  0. 1.0000     0. 
   9  -1   5      0.27    0.07  0. 1.0000     0. 
   9   1   5      0.17    0.09  0. 1.0000     0. 
   9   1   5      0.38    0.07  0. 1.0000     0. 
  -9   1  -5      0.17    0.17  0. 1.0000     0. 
  10  -1   5      1.71    0.12  0. 1.0000     0. 
 -10   1  -5      1.67    0.27  0. 1.0000     0. 
  10   1   5      1.70    0.12  0. 1.0000     0. 
  11  -1   5      0.28    0.05  0. 1.0000     0. 
  11   1   5      0.27    0.05  0. 1.0000     0. 
  11   1   5      0.28    0.05  0. 1.0000     0. 
  11  -2  -5      9.44    0.32  0. 1.0000     0. 
  11  -2  -5      9.65    0.32  0. 1.0000     0. 
  11   2  -5      9.11    0.32  0. 1.0000     0. 
  10  -2  -5      6.36    0.25  0. 1.0000     0. 
 -10  -2   5      5.88    0.43  0. 1.0000     0. 
  10  -2  -5      6.20    0.26  0. 1.0000     0. 
  10  -2  -5      6.59    0.30  0. 1.0000     0. 
  10   2  -5      6.55    0.25  0. 1.0000     0. 
 -10   2   5      6.57    0.46  0. 1.0000     0. 
   9  -2  -5      0.60    0.10  0. 1.0000     0. 
   9  -2  -5      0.63    0.09  0. 1.0000     0. 
   9  -2  -5      0.83    0.14  0. 1.0000     0. 
  -9  -2   5      0.92    0.22  0. 1.0000     0. 
   9  -2  -5      0.79    0.09  0. 1.0000     0. 
  -9   2   5      1.00    0.23  0. 1.0000     0. 
   9   2  -5      0.69    0.09  0. 1.0000     0. 
   8  -2  -5      0.28    0.18  0. 1.0000     0. 
  -8  -2   5      0.25    0.22  0. 1.0000     0. 
  -8  -2   5     -0.03    0.15  0. 1.0000     0. 
   8  -2  -5     -0.09    0.10  0. 1.0000     0. 
   8  -2  -5      0.00    0.07  0. 1.0000     0. 
   8  -2  -5      0.13    0.07  0. 1.0000     0. 
  -8   2   5      0.05    0.15  0. 1.0000     0. 
   8   2  -5      0.17    0.07  0. 1.0000     0. 
   8   2  -5     -0.02    0.06  0. 1.0000     0. 
  -8   2   5      0.24    0.20  0. 1.0000     0. 
   8   2  -5      0.05    0.05  0. 1.0000     0. 
   8   2  -5      0.12    0.05  0. 1.0000     0. 
  -7  -2   5      0.16    0.14  0. 1.0000     0. 
   7  -2  -5      0.29    0.17  0. 1.0000     0. 
  -7  -2   5      0.15    0.17  0. 1.0000     0. 
  -7   2   5      0.20    0.18  0. 1.0000     0. 
  -7   2   5     -0.15    0.12  0. 1.0000     0. 
   7   2  -5      0.10    0.05  0. 1.0000     0. 
  -6  -2   5      0.06    0.15  0. 1.0000     0. 
   6  -2  -5      0.19    0.03  0. 1.0000     0. 
   6  -2  -5      0.07    0.09  0. 1.0000     0. 
   6  -2  -5      0.17    0.15  0. 1.0000     0. 
  -6  -2   5      0.15    0.14  0. 1.0000     0. 
  -6   2   5      0.01    0.14  0. 1.0000     0. 
  -6   2   5      0.11    0.13  0. 1.0000     0. 
   5  -2  -5     30.01    1.17  0. 1.0000     0. 
  -5  -2   5     30.03    1.23  0. 1.0000     0. 
   5  -2  -5     32.04    1.25  0. 1.0000     0. 
  -5   2   5     29.06    1.22  0. 1.0000     0. 
   4  -2  -5     15.33    0.67  0. 1.0000     0. 
   4   2  -5     17.31    0.67  0. 1.0000     0. 
  -4   2   5     16.39    0.72  0. 1.0000     0. 
   4   2  -5     16.65    0.68  0. 1.0000     0. 
   4   2  -5     16.20    0.68  0. 1.0000     0. 
   3  -2  -5      5.91    0.31  0. 1.0000     0. 
  -3  -2   5      6.04    0.37  0. 1.0000     0. 
  -3   2   5      5.60    0.32  0. 1.0000     0. 
   3   2  -5      5.38    0.29  0. 1.0000     0. 
   3   2  -5      5.66    0.29  0. 1.0000     0. 
  -2  -2   5     10.14    0.53  0. 1.0000     0. 
  -2  -2   5     10.24    0.46  0. 1.0000     0. 
  -2  -2   5     10.35    0.51  0. 1.0000     0. 
   2  -2  -5     11.17    0.46  0. 1.0000     0. 
   2  -2  -5      9.93    0.52  0. 1.0000     0. 
   2   2  -5      9.80    0.45  0. 1.0000     0. 
   2   2  -5     10.21    0.52  0. 1.0000     0. 
  -2   2   5     10.87    0.45  0. 1.0000     0. 
  -2   2   5     10.27    0.47  0. 1.0000     0. 
   2   2  -5     10.30    0.46  0. 1.0000     0. 
  -1  -2   5    109.65    3.65  0. 1.0000     0. 
  -1  -2   5    100.15    3.78  0. 1.0000     0. 
   1  -2  -5    100.55    4.31  0. 1.0000     0. 
  -1  -2   5    108.31    4.07  0. 1.0000     0. 
   1  -2  -5    101.48    3.64  0. 1.0000     0. 
  -1   2   5     97.70    4.05  0. 1.0000     0. 
   1   2  -5     97.33    4.07  0. 1.0000     0. 
   1   2  -5    103.08    4.31  0. 1.0000     0. 
  -1   2   5     99.73    3.77  0. 1.0000     0. 
   1   2  -5    103.57    3.78  0. 1.0000     0. 
   0  -2  -5     65.48    2.71  0. 1.0000     0. 
   0  -2   5     66.45    2.35  0. 1.0000     0. 
   0  -2   5     67.97    2.61  0. 1.0000     0. 
   0  -2  -5     60.63    2.56  0. 1.0000     0. 
   0   2  -5     64.47    2.42  0. 1.0000     0. 
   0   2  -5     62.68    2.60  0. 1.0000     0. 
   0   2   5     62.97    2.57  0. 1.0000     0. 
   1  -2   5      2.16    0.19  0. 1.0000     0. 
  -1  -2  -5      1.93    0.17  0. 1.0000     0. 
  -1  -2  -5      1.77    0.14  0. 1.0000     0. 
   1  -2   5      2.18    0.22  0. 1.0000     0. 
   1  -2   5      1.96    0.16  0. 1.0000     0. 
  -1   2  -5      2.01    0.18  0. 1.0000     0. 
   1   2   5      2.11    0.20  0. 1.0000     0. 
   1   2   5      2.15    0.14  0. 1.0000     0. 
   2  -2   5      5.08    0.25  0. 1.0000     0. 
  -2  -2  -5      5.43    0.26  0. 1.0000     0. 
  -2  -2  -5      5.17    0.28  0. 1.0000     0. 
   2  -2   5      4.95    0.26  0. 1.0000     0. 
   2  -2   5      5.55    0.30  0. 1.0000     0. 
   2   2   5      5.59    0.31  0. 1.0000     0. 
  -2   2  -5      5.48    0.31  0. 1.0000     0. 
   3  -2   5     41.90    1.53  0. 1.0000     0. 
  -3  -2  -5     43.51    1.73  0. 1.0000     0. 
  -3   2  -5     40.29    1.81  0. 1.0000     0. 
  -3   2  -5     40.03    1.46  0. 1.0000     0. 
   4  -2   5      2.32    0.23  0. 1.0000     0. 
   4   2   5      2.66    0.22  0. 1.0000     0. 
  -4   2  -5      2.23    0.22  0. 1.0000     0. 
   5  -2   5     16.05    0.71  0. 1.0000     0. 
  -5  -2  -5     15.90    0.74  0. 1.0000     0. 
   5   2   5     15.74    0.69  0. 1.0000     0. 
   5   2   5     15.18    0.70  0. 1.0000     0. 
   6  -2   5     19.15    0.86  0. 1.0000     0. 
   6   2   5     19.99    0.87  0. 1.0000     0. 
   6   2   5     18.83    0.85  0. 1.0000     0. 
   7  -2   5      0.04    0.03  0. 1.0000     0. 
   7  -2   5     -0.01    0.07  0. 1.0000     0. 
   7  -2   5     -0.10    0.14  0. 1.0000     0. 
   7  -2   5      0.00    0.04  0. 1.0000     0. 
   7   2   5     -0.10    0.14  0. 1.0000     0. 
   7   2   5      0.05    0.07  0. 1.0000     0. 
   8  -2   5      1.73    0.32  0. 1.0000     0. 
   8  -2   5      2.32    0.14  0. 1.0000     0. 
   8   2   5      2.25    0.17  0. 1.0000     0. 
   8   2   5      2.05    0.12  0. 1.0000     0. 
   9  -2   5      0.03    0.06  0. 1.0000     0. 
   9   2   5     -0.01    0.05  0. 1.0000     0. 
  10  -2   5      5.86    0.24  0. 1.0000     0. 
  10   2   5      5.91    0.22  0. 1.0000     0. 
 -10   2  -5      6.01    0.44  0. 1.0000     0. 
  11  -2   5     10.93    0.35  0. 1.0000     0. 
  11   2   5     10.53    0.34  0. 1.0000     0. 
  11  -3  -5      2.47    0.13  0. 1.0000     0. 
  11  -3  -5      2.27    0.13  0. 1.0000     0. 
  11   3  -5      2.43    0.12  0. 1.0000     0. 
  10  -3  -5      0.17    0.06  0. 1.0000     0. 
  10  -3  -5     -0.17    0.09  0. 1.0000     0. 
  10  -3  -5      0.07    0.06  0. 1.0000     0. 
 -10   3   5     -0.06    0.13  0. 1.0000     0. 
  10   3  -5      0.05    0.06  0. 1.0000     0. 
   9  -3  -5      1.22    0.12  0. 1.0000     0. 
   9  -3  -5      1.48    0.13  0. 1.0000     0. 
   9  -3  -5      1.76    0.18  0. 1.0000     0. 
   9  -3  -5      1.57    0.14  0. 1.0000     0. 
  -9   3   5      1.25    0.26  0. 1.0000     0. 
   9   3  -5      1.38    0.13  0. 1.0000     0. 
   9   3  -5      1.40    0.13  0. 1.0000     0. 
   8  -3  -5     17.06    0.84  0. 1.0000     0. 
   8  -3  -5     15.88    0.55  0. 1.0000     0. 
   8  -3  -5     16.73    0.57  0. 1.0000     0. 
   8  -3  -5     16.10    0.63  0. 1.0000     0. 
  -8  -3   5     16.11    0.79  0. 1.0000     0. 
   8   3  -5     16.57    0.54  0. 1.0000     0. 
  -8   3   5     16.61    0.83  0. 1.0000     0. 
   8   3  -5     15.72    0.55  0. 1.0000     0. 
  -7  -3   5     51.60    1.92  0. 1.0000     0. 
   7  -3  -5     49.81    1.98  0. 1.0000     0. 
  -7  -3   5     52.03    2.08  0. 1.0000     0. 
  -7   3   5     52.62    1.97  0. 1.0000     0. 
   7   3  -5     54.08    1.76  0. 1.0000     0. 
  -7   3   5     52.19    2.06  0. 1.0000     0. 
  -6  -3   5      1.35    0.21  0. 1.0000     0. 
   6  -3  -5      1.82    0.26  0. 1.0000     0. 
  -6  -3   5      2.11    0.32  0. 1.0000     0. 
   6  -3  -5      1.81    0.22  0. 1.0000     0. 
   6  -3  -5      1.34    0.08  0. 1.0000     0. 
  -6   3   5      1.84    0.30  0. 1.0000     0. 
   5  -3  -5     30.66    1.25  0. 1.0000     0. 
   5  -3  -5     29.56    1.16  0. 1.0000     0. 
  -5   3   5     29.21    1.21  0. 1.0000     0. 
   4  -3  -5     15.45    0.67  0. 1.0000     0. 
  -4   3   5     16.33    0.71  0. 1.0000     0. 
   3  -3  -5      5.15    0.32  0. 1.0000     0. 
  -3  -3   5      5.28    0.30  0. 1.0000     0. 
   3   3  -5      5.11    0.28  0. 1.0000     0. 
   3   3  -5      5.47    0.28  0. 1.0000     0. 
  -3   3   5      5.62    0.33  0. 1.0000     0. 
  -2  -3   5      9.00    0.44  0. 1.0000     0. 
   2  -3  -5      9.93    0.50  0. 1.0000     0. 
   2  -3  -5      8.83    0.44  0. 1.0000     0. 
  -2  -3   5      9.43    0.48  0. 1.0000     0. 
   2   3  -5      9.56    0.42  0. 1.0000     0. 
  -2   3   5      8.85    0.47  0. 1.0000     0. 
  -2   3   5      9.36    0.44  0. 1.0000     0. 
  -2   3   5      9.66    0.43  0. 1.0000     0. 
   2   3  -5      8.42    0.42  0. 1.0000     0. 
  -1  -3   5      6.52    0.36  0. 1.0000     0. 
   1  -3  -5      5.79    0.34  0. 1.0000     0. 
   1  -3  -5      6.25    0.33  0. 1.0000     0. 
  -1  -3   5      6.38    0.35  0. 1.0000     0. 
  -1  -3   5      6.01    0.31  0. 1.0000     0. 
  -1   3   5      5.73    0.32  0. 1.0000     0. 
  -1   3   5      6.25    0.30  0. 1.0000     0. 
   1   3  -5      5.77    0.31  0. 1.0000     0. 
   1   3  -5      5.55    0.35  0. 1.0000     0. 
   1   3  -5      5.81    0.31  0. 1.0000     0. 
  -1   3   5      6.17    0.31  0. 1.0000     0. 
   1   3  -5      4.77    0.34  0. 1.0000     0. 
   0  -3   5     -0.06    0.12  0. 1.0000     0. 
   0  -3  -5      0.01    0.09  0. 1.0000     0. 
   0  -3  -5      0.03    0.11  0. 1.0000     0. 
   0  -3  -5      0.05    0.08  0. 1.0000     0. 
   0  -3   5      0.10    0.13  0. 1.0000     0. 
   0   3  -5      0.03    0.12  0. 1.0000     0. 
   0   3  -5     -0.13    0.10  0. 1.0000     0. 
   0   3   5      0.00    0.11  0. 1.0000     0. 
   0   3   5      0.00    0.10  0. 1.0000     0. 
   1  -3   5    118.13    4.43  0. 1.0000     0. 
  -1  -3  -5    104.50    4.74  0. 1.0000     0. 
  -1  -3  -5    123.59    4.27  0. 1.0000     0. 
   1  -3   5    124.96    4.29  0. 1.0000     0. 
   1  -3   5    126.61    4.78  0. 1.0000     0. 
   1   3   5    125.37    4.06  0. 1.0000     0. 
  -1   3  -5    118.51    4.44  0. 1.0000     0. 
  -1   3  -5    116.64    4.77  0. 1.0000     0. 
   1   3   5    121.78    4.74  0. 1.0000     0. 
  -2  -3  -5      0.02    0.07  0. 1.0000     0. 
   2  -3   5      0.13    0.11  0. 1.0000     0. 
   2  -3   5     -0.04    0.08  0. 1.0000     0. 
  -2  -3  -5     -0.03    0.08  0. 1.0000     0. 
   2   3   5      0.07    0.08  0. 1.0000     0. 
  -2   3  -5      0.00    0.08  0. 1.0000     0. 
  -2   3  -5      0.05    0.09  0. 1.0000     0. 
  -2   3  -5      0.14    0.10  0. 1.0000     0. 
  -3  -3  -5     25.25    1.07  0. 1.0000     0. 
   3  -3   5     23.30    0.94  0. 1.0000     0. 
   3  -3   5     23.35    0.91  0. 1.0000     0. 
   3  -3   5     23.81    0.96  0. 1.0000     0. 
  -3   3  -5     23.96    0.91  0. 1.0000     0. 
   4  -3   5     39.76    1.48  0. 1.0000     0. 
  -4   3  -5     40.43    1.47  0. 1.0000     0. 
   5  -3   5      2.87    0.28  0. 1.0000     0. 
   5   3   5      3.17    0.29  0. 1.0000     0. 
   6  -3   5      7.64    0.49  0. 1.0000     0. 
   6   3   5      9.51    0.52  0. 1.0000     0. 
   7  -3   5      2.13    0.13  0. 1.0000     0. 
   7  -3   5      2.45    0.34  0. 1.0000     0. 
   7   3   5      2.42    0.16  0. 1.0000     0. 
   7   3   5      2.43    0.33  0. 1.0000     0. 
   8  -3   5      3.68    0.24  0. 1.0000     0. 
   8  -3   5      3.82    0.19  0. 1.0000     0. 
   8  -3   5      4.08    0.42  0. 1.0000     0. 
   8  -3   5      4.10    0.20  0. 1.0000     0. 
   8   3   5      3.22    0.40  0. 1.0000     0. 
   8   3   5      3.67    0.17  0. 1.0000     0. 
   8   3   5      4.20    0.22  0. 1.0000     0. 
   9  -3   5      0.50    0.08  0. 1.0000     0. 
   9   3   5      0.48    0.07  0. 1.0000     0. 
  10  -3   5      0.39    0.07  0. 1.0000     0. 
  10   3   5      0.52    0.06  0. 1.0000     0. 
  10   3   5      0.43    0.06  0. 1.0000     0. 
  10   3   5      0.37    0.04  0. 1.0000     0. 
 -10   3  -5      0.68    0.19  0. 1.0000     0. 
  11  -3   5      0.14    0.05  0. 1.0000     0. 
  11   4  -5      1.04    0.08  0. 1.0000     0. 
  10  -4  -5      1.11    0.10  0. 1.0000     0. 
  10  -4  -5      1.19    0.14  0. 1.0000     0. 
  10  -4  -5      1.10    0.10  0. 1.0000     0. 
 -10   4   5      0.72    0.21  0. 1.0000     0. 
  10   4  -5      1.20    0.11  0. 1.0000     0. 
   9  -4  -5     -0.01    0.07  0. 1.0000     0. 
   9  -4  -5      0.13    0.08  0. 1.0000     0. 
   9  -4  -5      0.06    0.11  0. 1.0000     0. 
   9  -4  -5      0.12    0.08  0. 1.0000     0. 
  -9   4   5      0.08    0.16  0. 1.0000     0. 
   9   4  -5      0.10    0.07  0. 1.0000     0. 
   8  -4  -5      3.81    0.26  0. 1.0000     0. 
   8  -4  -5      3.99    0.41  0. 1.0000     0. 
   8  -4  -5      3.82    0.20  0. 1.0000     0. 
   8  -4  -5      3.63    0.21  0. 1.0000     0. 
   8   4  -5      3.59    0.19  0. 1.0000     0. 
   8   4  -5      3.72    0.19  0. 1.0000     0. 
  -8   4   5      3.09    0.36  0. 1.0000     0. 
   7  -4  -5      5.46    0.25  0. 1.0000     0. 
   7  -4  -5      5.21    0.43  0. 1.0000     0. 
  -7  -4   5      5.97    0.50  0. 1.0000     0. 
   7  -4  -5      4.90    0.23  0. 1.0000     0. 
  -7   4   5      4.90    0.47  0. 1.0000     0. 
   7   4  -5      4.95    0.22  0. 1.0000     0. 
   7   4  -5      5.24    0.21  0. 1.0000     0. 
   7   4  -5      5.17    0.22  0. 1.0000     0. 
  -7   4   5      5.04    0.41  0. 1.0000     0. 
  -6  -4   5     14.49    0.76  0. 1.0000     0. 
   6  -4  -5     14.16    0.40  0. 1.0000     0. 
   6  -4  -5     13.71    0.69  0. 1.0000     0. 
  -6   4   5     14.05    0.74  0. 1.0000     0. 
   5  -4  -5     43.14    1.59  0. 1.0000     0. 
  -5   4   5     41.13    1.63  0. 1.0000     0. 
   4  -4  -5      2.82    0.26  0. 1.0000     0. 
  -4   4   5      2.87    0.29  0. 1.0000     0. 
   3  -4  -5     21.23    0.86  0. 1.0000     0. 
  -3  -4   5     19.54    0.84  0. 1.0000     0. 
   3  -4  -5     19.95    0.79  0. 1.0000     0. 
   3   4  -5     19.82    0.81  0. 1.0000     0. 
  -3   4   5     22.21    0.84  0. 1.0000     0. 
   3   4  -5     19.20    0.80  0. 1.0000     0. 
  -2  -4   5    106.41    4.03  0. 1.0000     0. 
  -2  -4   5    113.43    4.52  0. 1.0000     0. 
   2  -4  -5    114.34    4.04  0. 1.0000     0. 
   2   4  -5    115.34    4.15  0. 1.0000     0. 
  -2   4   5    115.09    3.84  0. 1.0000     0. 
   2   4  -5    107.54    4.16  0. 1.0000     0. 
  -2   4   5    111.92    4.18  0. 1.0000     0. 
   1  -4  -5    136.00    5.68  0. 1.0000     0. 
  -1  -4   5    132.11    4.82  0. 1.0000     0. 
  -1  -4   5    138.60    5.39  0. 1.0000     0. 
   1  -4  -5    130.37    4.81  0. 1.0000     0. 
   1   4  -5    127.07    4.99  0. 1.0000     0. 
  -1   4   5    138.06    4.56  0. 1.0000     0. 
  -1   4   5    137.58    4.97  0. 1.0000     0. 
   1   4  -5    135.82    4.98  0. 1.0000     0. 
  -1   4   5    135.71    5.36  0. 1.0000     0. 
   0  -4   5      6.83    0.41  0. 1.0000     0. 
   0  -4  -5      8.04    0.39  0. 1.0000     0. 
   0  -4   5      7.82    0.44  0. 1.0000     0. 
   0  -4  -5      7.36    0.39  0. 1.0000     0. 
   0  -4  -5      7.60    0.40  0. 1.0000     0. 
   0   4  -5      7.40    0.38  0. 1.0000     0. 
   0   4   5      7.78    0.40  0. 1.0000     0. 
   0   4  -5      7.88    0.43  0. 1.0000     0. 
   0   4   5      8.39    0.35  0. 1.0000     0. 
  -1  -4  -5     10.53    0.50  0. 1.0000     0. 
   1  -4   5     10.31    0.51  0. 1.0000     0. 
   1  -4   5     10.12    0.54  0. 1.0000     0. 
  -1  -4  -5      9.67    0.48  0. 1.0000     0. 
  -1   4  -5     10.24    0.48  0. 1.0000     0. 
   1   4   5     11.39    0.46  0. 1.0000     0. 
   1   4   5     10.45    0.50  0. 1.0000     0. 
  -1   4  -5     10.12    0.53  0. 1.0000     0. 
  -1   4  -5     10.22    0.54  0. 1.0000     0. 
   2  -4   5     52.87    1.98  0. 1.0000     0. 
  -2  -4  -5     49.95    1.93  0. 1.0000     0. 
  -2  -4  -5     56.63    2.16  0. 1.0000     0. 
   2   4   5     51.24    2.15  0. 1.0000     0. 
   2   4   5     50.09    1.92  0. 1.0000     0. 
   3  -4   5      2.77    0.27  0. 1.0000     0. 
   3  -4   5      3.16    0.26  0. 1.0000     0. 
  -3  -4  -5      3.01    0.26  0. 1.0000     0. 
  -3   4  -5      3.10    0.24  0. 1.0000     0. 
   4  -4   5     34.19    1.28  0. 1.0000     0. 
  -4   4  -5     31.72    1.26  0. 1.0000     0. 
   4   4   5     34.32    1.28  0. 1.0000     0. 
   5  -4   5      3.22    0.30  0. 1.0000     0. 
   5   4   5      3.64    0.31  0. 1.0000     0. 
   6  -4   5     27.88    1.18  0. 1.0000     0. 
   6   4   5     27.34    0.67  0. 1.0000     0. 
   6   4   5     28.10    1.18  0. 1.0000     0. 
   6   4   5     27.72    0.86  0. 1.0000     0. 
   7  -4   5      0.37    0.08  0. 1.0000     0. 
   7  -4   5      0.42    0.20  0. 1.0000     0. 
   7  -4   5      0.30    0.08  0. 1.0000     0. 
   7  -4   5      0.33    0.08  0. 1.0000     0. 
   7  -4   5      0.26    0.07  0. 1.0000     0. 
   7   4   5      0.39    0.08  0. 1.0000     0. 
   7   4   5      0.13    0.18  0. 1.0000     0. 
   8  -4   5      0.04    0.07  0. 1.0000     0. 
   8  -4   5     -0.09    0.18  0. 1.0000     0. 
   8  -4   5      0.18    0.10  0. 1.0000     0. 
   8  -4   5      0.00    0.03  0. 1.0000     0. 
   8  -4   5      0.03    0.07  0. 1.0000     0. 
   8  -4   5      0.00    0.04  0. 1.0000     0. 
   8   4   5      0.04    0.05  0. 1.0000     0. 
   9  -4   5      1.19    0.15  0. 1.0000     0. 
   9  -4   5      1.30    0.11  0. 1.0000     0. 
   9   4   5      1.07    0.09  0. 1.0000     0. 
   9   4   5      1.06    0.07  0. 1.0000     0. 
   9   4   5      1.02    0.10  0. 1.0000     0. 
  10  -4   5      4.82    0.20  0. 1.0000     0. 
  10   4   5      4.44    0.17  0. 1.0000     0. 
  10   4   5      4.46    0.13  0. 1.0000     0. 
  11  -4   5      0.58    0.07  0. 1.0000     0. 
  10  -5  -5      0.33    0.08  0. 1.0000     0. 
  10  -5  -5      0.19    0.10  0. 1.0000     0. 
  10  -5  -5      0.17    0.06  0. 1.0000     0. 
  10   5  -5      0.31    0.07  0. 1.0000     0. 
   9  -5  -5      1.74    0.15  0. 1.0000     0. 
   9  -5  -5      1.52    0.15  0. 1.0000     0. 
   9  -5  -5      1.91    0.15  0. 1.0000     0. 
   9  -5  -5      1.79    0.18  0. 1.0000     0. 
   9   5  -5      1.71    0.13  0. 1.0000     0. 
  -9   5   5      1.76    0.28  0. 1.0000     0. 
   8  -5  -5      5.75    0.25  0. 1.0000     0. 
   8  -5  -5      5.79    0.32  0. 1.0000     0. 
   8  -5  -5      6.15    0.28  0. 1.0000     0. 
   8  -5  -5      5.97    0.48  0. 1.0000     0. 
  -8   5   5      5.13    0.45  0. 1.0000     0. 
   8   5  -5      5.83    0.25  0. 1.0000     0. 
  -7  -5   5     26.40    1.29  0. 1.0000     0. 
   7  -5  -5     29.33    1.23  0. 1.0000     0. 
   7  -5  -5     28.72    1.00  0. 1.0000     0. 
   7  -5  -5     28.25    0.76  0. 1.0000     0. 
   7  -5  -5     28.33    0.94  0. 1.0000     0. 
  -7   5   5     28.12    1.20  0. 1.0000     0. 
  -7   5   5     28.39    1.29  0. 1.0000     0. 
   7   5  -5     28.55    0.88  0. 1.0000     0. 
   6  -5  -5     14.11    0.75  0. 1.0000     0. 
   6  -5  -5     15.65    0.45  0. 1.0000     0. 
  -6   5   5     15.71    0.82  0. 1.0000     0. 
   6   5  -5     16.48    0.56  0. 1.0000     0. 
   5  -5  -5      3.14    0.31  0. 1.0000     0. 
  -5   5   5      3.12    0.34  0. 1.0000     0. 
   4  -5  -5      1.84    0.24  0. 1.0000     0. 
  -4   5   5      1.06    0.21  0. 1.0000     0. 
   3  -5  -5      0.40    0.14  0. 1.0000     0. 
   3  -5  -5      0.58    0.15  0. 1.0000     0. 
  -3   5   5      0.75    0.18  0. 1.0000     0. 
   3   5  -5      0.45    0.09  0. 1.0000     0. 
   3   5  -5      0.60    0.10  0. 1.0000     0. 
   2  -5  -5      1.64    0.21  0. 1.0000     0. 
  -2  -5   5      2.16    0.25  0. 1.0000     0. 
   2   5  -5      2.22    0.18  0. 1.0000     0. 
  -2   5   5      2.21    0.23  0. 1.0000     0. 
  -2   5   5      2.35    0.21  0. 1.0000     0. 
   1  -5  -5      0.20    0.11  0. 1.0000     0. 
  -1  -5   5      0.18    0.12  0. 1.0000     0. 
   1  -5  -5      0.21    0.10  0. 1.0000     0. 
   1   5  -5      0.16    0.10  0. 1.0000     0. 
  -1   5   5      0.20    0.10  0. 1.0000     0. 
  -1   5   5      0.13    0.08  0. 1.0000     0. 
   0  -5  -5     12.22    0.62  0. 1.0000     0. 
   0  -5   5     12.44    0.62  0. 1.0000     0. 
   0  -5  -5     12.02    0.59  0. 1.0000     0. 
   0  -5  -5     13.40    0.61  0. 1.0000     0. 
   0   5   5     12.38    0.51  0. 1.0000     0. 
   0   5   5     12.68    0.62  0. 1.0000     0. 
   0   5   5     12.86    0.56  0. 1.0000     0. 
   0   5  -5     13.03    0.58  0. 1.0000     0. 
  -1  -5  -5      8.16    0.45  0. 1.0000     0. 
  -1  -5  -5      9.11    0.47  0. 1.0000     0. 
   1  -5   5      8.09    0.49  0. 1.0000     0. 
  -1  -5  -5      9.86    0.43  0. 1.0000     0. 
   1   5   5      7.91    0.42  0. 1.0000     0. 
   1   5   5      8.94    0.47  0. 1.0000     0. 
   2  -5   5      0.53    0.16  0. 1.0000     0. 
  -2  -5  -5      0.74    0.14  0. 1.0000     0. 
  -2  -5  -5      1.22    0.19  0. 1.0000     0. 
   2   5   5      0.65    0.15  0. 1.0000     0. 
   3  -5   5      2.83    0.30  0. 1.0000     0. 
   4  -5   5     23.57    0.94  0. 1.0000     0. 
   4   5   5     22.13    0.92  0. 1.0000     0. 
  -4   5  -5     20.32    0.89  0. 1.0000     0. 
   5  -5   5      0.26    0.15  0. 1.0000     0. 
   5   5   5      0.12    0.14  0. 1.0000     0. 
   6  -5   5      5.12    0.42  0. 1.0000     0. 
   6   5   5      4.91    0.14  0. 1.0000     0. 
   6   5   5      5.13    0.22  0. 1.0000     0. 
   6   5   5      5.37    0.42  0. 1.0000     0. 
   7  -5   5      5.85    0.49  0. 1.0000     0. 
   7  -5   5      5.36    0.29  0. 1.0000     0. 
   7  -5   5      5.64    0.25  0. 1.0000     0. 
   7  -5   5      5.41    0.24  0. 1.0000     0. 
   7  -5   5      5.50    0.25  0. 1.0000     0. 
   7   5   5      5.67    0.26  0. 1.0000     0. 
   7   5   5      5.36    0.16  0. 1.0000     0. 
   8  -5   5      0.80    0.11  0. 1.0000     0. 
   8  -5   5      0.78    0.10  0. 1.0000     0. 
   8  -5   5      1.09    0.28  0. 1.0000     0. 
   8  -5   5      0.87    0.14  0. 1.0000     0. 
   8  -5   5      0.70    0.07  0. 1.0000     0. 
   8   5   5      0.82    0.06  0. 1.0000     0. 
   9  -5   5      4.24    0.21  0. 1.0000     0. 
   9  -5   5      4.26    0.20  0. 1.0000     0. 
   9  -5   5      4.52    0.27  0. 1.0000     0. 
   9   5   5      4.42    0.13  0. 1.0000     0. 
  10  -5   5     -0.31    0.08  0. 1.0000     0. 
  10  -5   5      0.17    0.06  0. 1.0000     0. 
  10   5   5      0.00    0.02  0. 1.0000     0. 
  10  -6  -5      0.49    0.11  0. 1.0000     0. 
  10  -6  -5      0.34    0.08  0. 1.0000     0. 
  10   6  -5      0.47    0.07  0. 1.0000     0. 
   9  -6  -5      0.13    0.08  0. 1.0000     0. 
   9  -6  -5      0.09    0.08  0. 1.0000     0. 
   9  -6  -5     -0.05    0.10  0. 1.0000     0. 
  -9   6   5      0.06    0.15  0. 1.0000     0. 
   9   6  -5      0.15    0.06  0. 1.0000     0. 
   8  -6  -5      2.13    0.18  0. 1.0000     0. 
   8  -6  -5      2.15    0.22  0. 1.0000     0. 
   8  -6  -5      2.38    0.36  0. 1.0000     0. 
   8   6  -5      2.11    0.14  0. 1.0000     0. 
  -8   6   5      1.60    0.28  0. 1.0000     0. 
   7  -6  -5      0.09    0.04  0. 1.0000     0. 
   7  -6  -5      0.18    0.11  0. 1.0000     0. 
   7  -6  -5      0.13    0.19  0. 1.0000     0. 
  -7  -6   5      0.21    0.23  0. 1.0000     0. 
   7  -6  -5      0.10    0.09  0. 1.0000     0. 
  -7   6   5      0.01    0.14  0. 1.0000     0. 
  -7   6   5      0.25    0.20  0. 1.0000     0. 
   7   6  -5      0.21    0.07  0. 1.0000     0. 
   6  -6  -5     19.51    0.55  0. 1.0000     0. 
   6  -6  -5     17.87    0.89  0. 1.0000     0. 
   6   6  -5     19.96    0.67  0. 1.0000     0. 
  -6   6   5     18.65    0.95  0. 1.0000     0. 
   5  -6  -5      2.44    0.30  0. 1.0000     0. 
  -5   6   5      2.66    0.35  0. 1.0000     0. 
   4  -6  -5     12.65    0.61  0. 1.0000     0. 
  -4   6   5     12.48    0.65  0. 1.0000     0. 
   3  -6  -5     48.38    1.74  0. 1.0000     0. 
   3  -6  -5     46.72    1.88  0. 1.0000     0. 
  -3   6   5     48.46    1.79  0. 1.0000     0. 
   2  -6  -5      1.39    0.21  0. 1.0000     0. 
  -2  -6   5      1.28    0.22  0. 1.0000     0. 
  -2   6   5      1.44    0.22  0. 1.0000     0. 
   2   6  -5      1.37    0.16  0. 1.0000     0. 
  -2   6   5      1.23    0.19  0. 1.0000     0. 
  -2   6   5      1.32    0.18  0. 1.0000     0. 
   1  -6  -5     76.30    2.82  0. 1.0000     0. 
  -1  -6   5     76.96    2.84  0. 1.0000     0. 
  -1   6   5     74.00    2.83  0. 1.0000     0. 
   1   6  -5     72.86    2.85  0. 1.0000     0. 
  -1   6   5     76.83    2.74  0. 1.0000     0. 
   0  -6  -5     40.34    1.57  0. 1.0000     0. 
   0  -6  -5     40.84    1.68  0. 1.0000     0. 
   0  -6   5     38.47    1.58  0. 1.0000     0. 
   0  -6  -5     39.11    1.75  0. 1.0000     0. 
   0   6   5     39.12    1.50  0. 1.0000     0. 
   0   6  -5     38.37    1.56  0. 1.0000     0. 
  -1  -6  -5    129.89    4.71  0. 1.0000     0. 
   1  -6   5    128.33    4.75  0. 1.0000     0. 
  -1  -6  -5    138.25    5.49  0. 1.0000     0. 
  -1  -6  -5    124.28    5.22  0. 1.0000     0. 
   1   6   5    129.12    4.63  0. 1.0000     0. 
   2  -6   5      0.52    0.17  0. 1.0000     0. 
  -2  -6  -5      0.92    0.17  0. 1.0000     0. 
  -2  -6  -5      0.98    0.12  0. 1.0000     0. 
   2   6   5      0.66    0.17  0. 1.0000     0. 
  -3  -6  -5     56.83    2.21  0. 1.0000     0. 
   3  -6   5     50.54    2.03  0. 1.0000     0. 
   3   6   5     45.92    1.86  0. 1.0000     0. 
   4  -6   5     28.64    1.14  0. 1.0000     0. 
   4   6   5     26.01    1.11  0. 1.0000     0. 
   5  -6   5     11.33    0.65  0. 1.0000     0. 
   5  -6   5     12.11    0.34  0. 1.0000     0. 
   5   6   5     13.12    0.67  0. 1.0000     0. 
   6  -6   5      6.10    0.47  0. 1.0000     0. 
   6   6   5      5.48    0.24  0. 1.0000     0. 
   6   6   5      5.57    0.46  0. 1.0000     0. 
   6   6   5      5.36    0.16  0. 1.0000     0. 
   7  -6   5     17.64    0.58  0. 1.0000     0. 
   7  -6   5     17.31    0.65  0. 1.0000     0. 
   7  -6   5     16.99    0.60  0. 1.0000     0. 
   7  -6   5     19.18    0.93  0. 1.0000     0. 
   7   6   5     16.31    0.43  0. 1.0000     0. 
   8  -6   5      0.09    0.06  0. 1.0000     0. 
   8  -6   5     -0.01    0.08  0. 1.0000     0. 
   8  -6   5     -0.02    0.17  0. 1.0000     0. 
   8  -6   5      0.08    0.08  0. 1.0000     0. 
   8  -6   5      0.17    0.11  0. 1.0000     0. 
   8   6   5      0.11    0.03  0. 1.0000     0. 
   9  -6   5     10.64    0.38  0. 1.0000     0. 
   9  -6   5     10.06    0.38  0. 1.0000     0. 
   9  -6   5     10.88    0.45  0. 1.0000     0. 
   9   6   5     10.67    0.27  0. 1.0000     0. 
  10  -6   5     12.96    0.50  0. 1.0000     0. 
  10  -6   5     13.51    0.44  0. 1.0000     0. 
  10  -7  -5      1.89    0.13  0. 1.0000     0. 
  10  -7  -5      1.68    0.16  0. 1.0000     0. 
  10   7  -5      1.68    0.11  0. 1.0000     0. 
   9  -7  -5      3.37    0.20  0. 1.0000     0. 
   9  -7  -5      3.27    0.23  0. 1.0000     0. 
   9   7  -5      3.42    0.17  0. 1.0000     0. 
  -9   7   5      3.68    0.35  0. 1.0000     0. 
   8  -7  -5      6.40    0.29  0. 1.0000     0. 
   8  -7  -5      6.08    0.32  0. 1.0000     0. 
   8   7  -5      5.54    0.24  0. 1.0000     0. 
  -8   7   5      6.03    0.46  0. 1.0000     0. 
   7  -7  -5      2.40    0.19  0. 1.0000     0. 
   7  -7  -5      2.66    0.11  0. 1.0000     0. 
   7  -7  -5      2.62    0.23  0. 1.0000     0. 
   7  -7  -5      2.84    0.38  0. 1.0000     0. 
   7   7  -5      2.55    0.16  0. 1.0000     0. 
  -7   7   5      3.03    0.35  0. 1.0000     0. 
   6  -7  -5      0.74    0.12  0. 1.0000     0. 
   6  -7  -5      0.54    0.11  0. 1.0000     0. 
   6  -7  -5      0.61    0.23  0. 1.0000     0. 
   6  -7  -5      0.95    0.09  0. 1.0000     0. 
   6   7  -5      0.66    0.06  0. 1.0000     0. 
  -6   7   5      0.39    0.22  0. 1.0000     0. 
   6   7  -5      0.76    0.06  0. 1.0000     0. 
   6   7  -5      0.78    0.09  0. 1.0000     0. 
   5  -7  -5     20.93    0.99  0. 1.0000     0. 
   5   7  -5     23.44    0.79  0. 1.0000     0. 
  -5   7   5     23.27    1.06  0. 1.0000     0. 
   4  -7  -5     11.61    0.59  0. 1.0000     0. 
  -4   7   5     11.86    0.64  0. 1.0000     0. 
   3  -7  -5      5.19    0.43  0. 1.0000     0. 
   3  -7  -5      5.94    0.38  0. 1.0000     0. 
  -3   7   5      5.33    0.39  0. 1.0000     0. 
  -3   7   5      5.44    0.38  0. 1.0000     0. 
  -2  -7   5     10.21    0.61  0. 1.0000     0. 
   2  -7  -5     10.41    0.59  0. 1.0000     0. 
  -2   7   5      9.48    0.52  0. 1.0000     0. 
   2   7  -5     10.92    0.47  0. 1.0000     0. 
  -2   7   5     10.67    0.53  0. 1.0000     0. 
  -1  -7   5     14.04    0.75  0. 1.0000     0. 
   1  -7  -5     14.26    0.73  0. 1.0000     0. 
  -1   7   5     14.20    0.66  0. 1.0000     0. 
   1   7  -5     14.25    0.65  0. 1.0000     0. 
  -1   7   5     15.20    0.63  0. 1.0000     0. 
   0  -7   5      3.47    0.38  0. 1.0000     0. 
   0  -7  -5      3.45    0.34  0. 1.0000     0. 
   0   7  -5      4.01    0.29  0. 1.0000     0. 
   0   7   5      3.97    0.30  0. 1.0000     0. 
   1  -7   5     62.27    2.47  0. 1.0000     0. 
  -1  -7  -5     63.65    2.44  0. 1.0000     0. 
  -1  -7  -5     67.36    2.77  0. 1.0000     0. 
   1   7   5     60.65    2.35  0. 1.0000     0. 
   2  -7   5     82.89    3.22  0. 1.0000     0. 
  -2  -7  -5     84.67    3.19  0. 1.0000     0. 
  -2  -7  -5     89.35    3.64  0. 1.0000     0. 
   2   7   5     82.18    3.10  0. 1.0000     0. 
   3  -7   5     19.32    0.96  0. 1.0000     0. 
   4  -7   5     13.20    0.69  0. 1.0000     0. 
   5  -7   5     12.75    0.36  0. 1.0000     0. 
   5  -7   5     11.47    0.68  0. 1.0000     0. 
   5   7   5     12.29    0.32  0. 1.0000     0. 
   6  -7   5     41.65    1.27  0. 1.0000     0. 
   6  -7   5     42.75    1.70  0. 1.0000     0. 
   6  -7   5     41.44    1.33  0. 1.0000     0. 
   6   7   5     40.08    0.99  0. 1.0000     0. 
   7  -7   5     27.33    1.23  0. 1.0000     0. 
   7  -7   5     25.31    0.83  0. 1.0000     0. 
   7  -7   5     26.14    0.93  0. 1.0000     0. 
   7  -7   5     26.03    0.87  0. 1.0000     0. 
   7   7   5     25.44    0.63  0. 1.0000     0. 
   8  -7   5      4.25    0.20  0. 1.0000     0. 
   8  -7   5      4.82    0.28  0. 1.0000     0. 
   8  -7   5      4.13    0.23  0. 1.0000     0. 
   8  -7   5      4.16    0.22  0. 1.0000     0. 
   8  -7   5      4.58    0.22  0. 1.0000     0. 
   8   7   5      4.03    0.13  0. 1.0000     0. 
   9  -7   5      0.09    0.07  0. 1.0000     0. 
   9  -7   5      0.11    0.11  0. 1.0000     0. 
   9  -7   5      0.03    0.06  0. 1.0000     0. 
   9   7   5      0.09    0.02  0. 1.0000     0. 
  10  -7   5      3.30    0.16  0. 1.0000     0. 
  10  -7   5      2.97    0.20  0. 1.0000     0. 
  10  -8  -5      3.99    0.18  0. 1.0000     0. 
  10  -8  -5      3.95    0.21  0. 1.0000     0. 
  10   8  -5      4.31    0.16  0. 1.0000     0. 
   9  -8  -5      1.67    0.17  0. 1.0000     0. 
   9  -8  -5      1.73    0.15  0. 1.0000     0. 
   9   8  -5      1.47    0.12  0. 1.0000     0. 
   8  -8  -5      6.67    0.30  0. 1.0000     0. 
   8  -8  -5      6.95    0.34  0. 1.0000     0. 
   8   8  -5      6.57    0.26  0. 1.0000     0. 
   7  -8  -5      0.60    0.06  0. 1.0000     0. 
   7  -8  -5      0.61    0.14  0. 1.0000     0. 
   7  -8  -5      0.74    0.12  0. 1.0000     0. 
   7  -8  -5      0.56    0.22  0. 1.0000     0. 
   7  -8  -5      0.54    0.12  0. 1.0000     0. 
   7   8  -5      0.67    0.09  0. 1.0000     0. 
   6  -8  -5      0.19    0.09  0. 1.0000     0. 
   6  -8  -5      0.36    0.19  0. 1.0000     0. 
   6  -8  -5      0.19    0.07  0. 1.0000     0. 
   6  -8  -5      0.36    0.13  0. 1.0000     0. 
   6   8  -5      0.23    0.07  0. 1.0000     0. 
   5  -8  -5      0.09    0.16  0. 1.0000     0. 
   5   8  -5      0.06    0.05  0. 1.0000     0. 
   4  -8  -5      7.69    0.49  0. 1.0000     0. 
  -4   8   5      7.42    0.50  0. 1.0000     0. 
   3  -8  -5      9.74    0.63  0. 1.0000     0. 
   3  -8  -5     10.00    0.54  0. 1.0000     0. 
  -3   8   5      9.32    0.54  0. 1.0000     0. 
  -2  -8   5      5.68    0.47  0. 1.0000     0. 
   2  -8  -5      5.32    0.46  0. 1.0000     0. 
   2   8  -5      6.05    0.30  0. 1.0000     0. 
  -2   8   5      5.92    0.39  0. 1.0000     0. 
  -2   8   5      6.22    0.37  0. 1.0000     0. 
   1  -8  -5     -0.10    0.13  0. 1.0000     0. 
  -1  -8   5     -0.12    0.14  0. 1.0000     0. 
   1   8  -5      0.02    0.10  0. 1.0000     0. 
  -1   8   5      0.07    0.08  0. 1.0000     0. 
  -1   8   5      0.02    0.10  0. 1.0000     0. 
   0  -8  -5      0.26    0.17  0. 1.0000     0. 
   0  -8   5      0.10    0.17  0. 1.0000     0. 
   0   8  -5      0.50    0.14  0. 1.0000     0. 
   0   8   5      0.23    0.12  0. 1.0000     0. 
  -1  -8  -5    152.24    5.37  0. 1.0000     0. 
   1  -8   5    143.79    5.38  0. 1.0000     0. 
   1   8   5    141.84    5.20  0. 1.0000     0. 
  -2  -8  -5      8.24    0.55  0. 1.0000     0. 
   2  -8   5      8.71    0.59  0. 1.0000     0. 
   2   8   5      8.65    0.49  0. 1.0000     0. 
   3  -8   5     18.28    0.96  0. 1.0000     0. 
   4  -8   5      0.28    0.06  0. 1.0000     0. 
   4  -8   5      0.52    0.21  0. 1.0000     0. 
   5  -8   5     13.68    0.75  0. 1.0000     0. 
   5  -8   5     13.42    0.38  0. 1.0000     0. 
   5   8   5     12.52    0.34  0. 1.0000     0. 
   6  -8   5      3.74    0.46  0. 1.0000     0. 
   6  -8   5      3.36    0.22  0. 1.0000     0. 
   6  -8   5      3.80    0.20  0. 1.0000     0. 
   6   8   5      3.47    0.12  0. 1.0000     0. 
   7  -8   5      5.71    0.28  0. 1.0000     0. 
   7  -8   5      5.99    0.32  0. 1.0000     0. 
   7  -8   5      5.84    0.26  0. 1.0000     0. 
   7  -8   5      5.93    0.54  0. 1.0000     0. 
   7   8   5      5.82    0.17  0. 1.0000     0. 
   8  -8   5      1.82    0.14  0. 1.0000     0. 
   8  -8   5      1.76    0.19  0. 1.0000     0. 
   8  -8   5      2.04    0.16  0. 1.0000     0. 
   8  -8   5      1.69    0.17  0. 1.0000     0. 
   8  -8   5      1.98    0.16  0. 1.0000     0. 
   8   8   5      1.90    0.08  0. 1.0000     0. 
   9  -8   5      0.31    0.08  0. 1.0000     0. 
   9  -8   5      0.24    0.11  0. 1.0000     0. 
   9  -8   5      0.36    0.08  0. 1.0000     0. 
  10  -8   5     23.60    0.81  0. 1.0000     0. 
   9  -9  -5      4.54    0.25  0. 1.0000     0. 
   9  -9  -5      5.00    0.22  0. 1.0000     0. 
   9   9  -5      4.37    0.18  0. 1.0000     0. 
   8  -9  -5      0.04    0.08  0. 1.0000     0. 
   8  -9  -5     -0.09    0.10  0. 1.0000     0. 
   8   9  -5      0.03    0.06  0. 1.0000     0. 
   7  -9  -5      9.11    0.28  0. 1.0000     0. 
   7  -9  -5      9.48    0.41  0. 1.0000     0. 
   7  -9  -5      9.39    0.39  0. 1.0000     0. 
   7   9  -5      9.32    0.34  0. 1.0000     0. 
   6  -9  -5      0.35    0.22  0. 1.0000     0. 
   6  -9  -5      0.53    0.11  0. 1.0000     0. 
   6  -9  -5      0.53    0.13  0. 1.0000     0. 
   6  -9  -5      0.46    0.11  0. 1.0000     0. 
   6  -9  -5      0.52    0.08  0. 1.0000     0. 
  -6   9   5      0.53    0.23  0. 1.0000     0. 
   6   9  -5      0.46    0.09  0. 1.0000     0. 
   5  -9  -5     10.76    0.65  0. 1.0000     0. 
   5   9  -5     10.55    0.39  0. 1.0000     0. 
  -5   9   5     11.03    0.67  0. 1.0000     0. 
   5   9  -5     11.71    0.40  0. 1.0000     0. 
   5   9  -5     10.96    0.39  0. 1.0000     0. 
   5   9  -5     11.06    0.39  0. 1.0000     0. 
   4  -9  -5      0.56    0.20  0. 1.0000     0. 
   4   9  -5      0.45    0.07  0. 1.0000     0. 
  -4   9   5      0.43    0.21  0. 1.0000     0. 
   3  -9  -5     70.71    2.57  0. 1.0000     0. 
  -3   9   5     72.31    2.70  0. 1.0000     0. 
  -3   9   5     70.07    1.90  0. 1.0000     0. 
  -2  -9   5     68.10    2.79  0. 1.0000     0. 
  -2   9   5     69.17    1.88  0. 1.0000     0. 
  -2   9   5     72.38    2.67  0. 1.0000     0. 
  -2   9   5     72.92    2.73  0. 1.0000     0. 
   1  -9  -5     71.15    2.84  0. 1.0000     0. 
  -1  -9   5     69.57    2.84  0. 1.0000     0. 
  -1   9   5     73.09    2.69  0. 1.0000     0. 
   1   9  -5     74.01    2.74  0. 1.0000     0. 
  -1   9   5     70.23    2.68  0. 1.0000     0. 
   0  -9  -5      1.17    0.26  0. 1.0000     0. 
   0  -9   5      1.28    0.28  0. 1.0000     0. 
   0   9  -5      1.60    0.22  0. 1.0000     0. 
   0   9   5      1.36    0.22  0. 1.0000     0. 
   1  -9   5     12.91    0.78  0. 1.0000     0. 
  -1  -9  -5     12.58    0.74  0. 1.0000     0. 
   1   9   5     12.14    0.63  0. 1.0000     0. 
  -2  -9  -5      5.19    0.48  0. 1.0000     0. 
   2  -9   5      4.74    0.49  0. 1.0000     0. 
   2   9   5      5.93    0.41  0. 1.0000     0. 
   3  -9   5     11.37    0.79  0. 1.0000     0. 
   4  -9   5      4.15    0.17  0. 1.0000     0. 
   4  -9   5      4.51    0.44  0. 1.0000     0. 
   5  -9   5      1.97    0.36  0. 1.0000     0. 
   5  -9   5      2.12    0.19  0. 1.0000     0. 
   5  -9   5      1.84    0.11  0. 1.0000     0. 
   6  -9   5     -0.05    0.08  0. 1.0000     0. 
   6  -9   5      0.00    0.10  0. 1.0000     0. 
   6  -9   5     -0.14    0.20  0. 1.0000     0. 
   6   9   5      0.04    0.04  0. 1.0000     0. 
   7  -9   5     39.12    1.29  0. 1.0000     0. 
   7  -9   5     39.13    1.35  0. 1.0000     0. 
   7   9   5     40.20    0.95  0. 1.0000     0. 
   8  -9   5     23.02    0.78  0. 1.0000     0. 
   8  -9   5     23.78    0.82  0. 1.0000     0. 
   8  -9   5     23.12    0.78  0. 1.0000     0. 
   8  -9   5     22.48    0.84  0. 1.0000     0. 
   8   9   5     23.98    0.56  0. 1.0000     0. 
   9  -9   5      3.94    0.24  0. 1.0000     0. 
   9  -9   5      3.97    0.19  0. 1.0000     0. 
   9 -10  -5      5.16    0.22  0. 1.0000     0. 
   9 -10  -5      5.25    0.25  0. 1.0000     0. 
   9  10  -5      5.34    0.19  0. 1.0000     0. 
   8 -10  -5      4.29    0.25  0. 1.0000     0. 
   8 -10  -5      4.47    0.22  0. 1.0000     0. 
   8  10  -5      4.19    0.18  0. 1.0000     0. 
   7 -10  -5      3.86    0.14  0. 1.0000     0. 
   7 -10  -5      3.88    0.25  0. 1.0000     0. 
   7 -10  -5      4.25    0.23  0. 1.0000     0. 
   7  10  -5      3.52    0.18  0. 1.0000     0. 
   6 -10  -5      0.38    0.11  0. 1.0000     0. 
   6 -10  -5      0.35    0.07  0. 1.0000     0. 
   6 -10  -5      0.44    0.11  0. 1.0000     0. 
   6 -10  -5      0.49    0.13  0. 1.0000     0. 
   6  10  -5      0.32    0.08  0. 1.0000     0. 
  -6  10   5      0.57    0.22  0. 1.0000     0. 
   5 -10  -5      0.14    0.20  0. 1.0000     0. 
  -5  10   5      0.30    0.10  0. 1.0000     0. 
   5  10  -5      0.20    0.06  0. 1.0000     0. 
  -5  10   5      0.30    0.19  0. 1.0000     0. 
   5  10  -5      0.13    0.07  0. 1.0000     0. 
   4 -10  -5      4.39    0.42  0. 1.0000     0. 
  -4  10   5      5.00    0.25  0. 1.0000     0. 
   4  10  -5      5.30    0.22  0. 1.0000     0. 
   4  10  -5      5.07    0.23  0. 1.0000     0. 
  -4  10   5      6.19    0.48  0. 1.0000     0. 
   4  10  -5      5.50    0.23  0. 1.0000     0. 
  -4  10   5      5.08    0.19  0. 1.0000     0. 
   3 -10  -5     39.55    1.63  0. 1.0000     0. 
  -3  10   5     41.88    1.12  0. 1.0000     0. 
  -3  10   5     41.74    1.71  0. 1.0000     0. 
   3  10  -5     42.28    1.43  0. 1.0000     0. 
  -2  10   5      1.15    0.23  0. 1.0000     0. 
  -2  10   5      1.00    0.06  0. 1.0000     0. 
  -1  10   5     18.20    0.86  0. 1.0000     0. 
   1  10  -5     18.70    0.50  0. 1.0000     0. 
   0  10  -5      0.28    0.05  0. 1.0000     0. 
   0  10  -5      0.18    0.13  0. 1.0000     0. 
   0  10   5      0.04    0.12  0. 1.0000     0. 
  -1  10  -5     10.35    0.31  0. 1.0000     0. 
   2  10   5     14.76    0.50  0. 1.0000     0. 
   4 -10   5     12.93    0.75  0. 1.0000     0. 
   4 -10   5     11.95    0.47  0. 1.0000     0. 
   4  10   5     12.29    0.40  0. 1.0000     0. 
   5 -10   5     25.19    1.20  0. 1.0000     0. 
   5 -10   5     25.36    0.86  0. 1.0000     0. 
   5 -10   5     26.08    0.70  0. 1.0000     0. 
   5  10   5     23.70    0.77  0. 1.0000     0. 
   6 -10   5      2.08    0.38  0. 1.0000     0. 
   6 -10   5      2.25    0.21  0. 1.0000     0. 
   6 -10   5      2.06    0.18  0. 1.0000     0. 
   6  10   5      1.70    0.09  0. 1.0000     0. 
   6  10   5      1.76    0.11  0. 1.0000     0. 
   7 -10   5      1.41    0.14  0. 1.0000     0. 
   7 -10   5      1.57    0.17  0. 1.0000     0. 
   7  10   5      1.41    0.07  0. 1.0000     0. 
   7  10   5      1.50    0.07  0. 1.0000     0. 
   8 -10   5      1.48    0.11  0. 1.0000     0. 
   8 -10   5      1.58    0.15  0. 1.0000     0. 
   8 -10   5      1.69    0.17  0. 1.0000     0. 
   8 -10   5      1.56    0.15  0. 1.0000     0. 
   9 -10   5      3.04    0.16  0. 1.0000     0. 
   9 -10   5      3.77    0.21  0. 1.0000     0. 
   8 -11  -5      2.30    0.18  0. 1.0000     0. 
   8 -11  -5      2.37    0.17  0. 1.0000     0. 
   8  11  -5      2.37    0.12  0. 1.0000     0. 
   7 -11  -5     15.36    0.60  0. 1.0000     0. 
   7 -11  -5     15.90    0.57  0. 1.0000     0. 
  -7  11   5     16.83    0.46  0. 1.0000     0. 
   7  11  -5     15.90    0.52  0. 1.0000     0. 
   6 -11  -5      0.85    0.13  0. 1.0000     0. 
   6 -11  -5      0.88    0.09  0. 1.0000     0. 
   6 -11  -5      0.99    0.15  0. 1.0000     0. 
   6 -11  -5      0.84    0.13  0. 1.0000     0. 
  -6  11   5      0.78    0.07  0. 1.0000     0. 
   6  11  -5      0.99    0.10  0. 1.0000     0. 
   5  11  -5     39.95    1.22  0. 1.0000     0. 
  -5  11   5     39.52    1.08  0. 1.0000     0. 
  -5  11   5     39.48    1.29  0. 1.0000     0. 
  -5  11   5     39.25    1.69  0. 1.0000     0. 
  -4  11   5     37.70    1.02  0. 1.0000     0. 
   4  11  -5     37.75    1.16  0. 1.0000     0. 
  -4  11   5     36.42    1.23  0. 1.0000     0. 
   4  11  -5     38.05    1.27  0. 1.0000     0. 
  -4  11   5     37.60    1.61  0. 1.0000     0. 
   4  11  -5     37.55    1.20  0. 1.0000     0. 
   3  11  -5     27.11    0.84  0. 1.0000     0. 
   3  11  -5     26.47    0.87  0. 1.0000     0. 
   3  11  -5     25.81    0.93  0. 1.0000     0. 
  -3  11   5     27.67    1.21  0. 1.0000     0. 
  -3  11   5     26.88    0.73  0. 1.0000     0. 
  -3  11   5     26.23    0.89  0. 1.0000     0. 
  -2  11   5      0.40    0.19  0. 1.0000     0. 
   0  11  -5      0.23    0.04  0. 1.0000     0. 
   0  11   5      0.05    0.05  0. 1.0000     0. 
  -1  11  -5     15.94    0.45  0. 1.0000     0. 
   1  11   5     15.68    0.56  0. 1.0000     0. 
  -2  11  -5     29.21    0.81  0. 1.0000     0. 
  -3  11  -5      0.24    0.10  0. 1.0000     0. 
   3  11   5      0.36    0.06  0. 1.0000     0. 
   4 -11   5      0.45    0.12  0. 1.0000     0. 
   4 -11   5      0.39    0.25  0. 1.0000     0. 
   4 -11   5      0.32    0.08  0. 1.0000     0. 
   4  11   5      0.33    0.06  0. 1.0000     0. 
   5 -11   5      0.10    0.06  0. 1.0000     0. 
   5 -11   5      0.37    0.24  0. 1.0000     0. 
   5 -11   5      0.08    0.10  0. 1.0000     0. 
   5  11   5      0.02    0.05  0. 1.0000     0. 
   6 -11   5      0.50    0.11  0. 1.0000     0. 
   6 -11   5      0.29    0.12  0. 1.0000     0. 
   6  11   5      0.26    0.04  0. 1.0000     0. 
   6  11   5      0.29    0.05  0. 1.0000     0. 
   7 -11   5     27.58    0.98  0. 1.0000     0. 
   7 -11   5     27.08    0.94  0. 1.0000     0. 
   7  11   5     28.97    0.68  0. 1.0000     0. 
   7  11   5     29.26    0.68  0. 1.0000     0. 
   8 -11   5      0.95    0.13  0. 1.0000     0. 
   8 -11   5      0.76    0.07  0. 1.0000     0. 
   8 -11   5      0.70    0.10  0. 1.0000     0. 
   9 -11   5      1.06    0.11  0. 1.0000     0. 
   8 -12  -5      0.91    0.10  0. 1.0000     0. 
   8 -12  -5      1.09    0.11  0. 1.0000     0. 
   8  12  -5      1.22    0.08  0. 1.0000     0. 
   7 -12  -5      1.44    0.15  0. 1.0000     0. 
   7 -12  -5      1.65    0.15  0. 1.0000     0. 
  -7  12   5      1.64    0.08  0. 1.0000     0. 
   7  12  -5      1.45    0.11  0. 1.0000     0. 
   6 -12  -5      4.08    0.16  0. 1.0000     0. 
  -6  12   5      4.09    0.14  0. 1.0000     0. 
   6  12  -5      3.89    0.18  0. 1.0000     0. 
  -6  12   5      3.92    0.22  0. 1.0000     0. 
  -5  12   5      7.19    0.33  0. 1.0000     0. 
  -5  12   5      7.84    0.24  0. 1.0000     0. 
   5  12  -5      7.90    0.29  0. 1.0000     0. 
  -4  12   5      0.77    0.07  0. 1.0000     0. 
   4  12  -5      0.96    0.09  0. 1.0000     0. 
  -4  12   5      0.79    0.11  0. 1.0000     0. 
   4  12  -5      0.77    0.09  0. 1.0000     0. 
   3  12  -5     49.93    1.54  0. 1.0000     0. 
  -3  12   5     52.46    1.62  0. 1.0000     0. 
   3  12  -5     50.45    1.60  0. 1.0000     0. 
   3  12  -5     50.07    1.72  0. 1.0000     0. 
  -2  12   5      0.46    0.08  0. 1.0000     0. 
   2  12  -5      0.36    0.08  0. 1.0000     0. 
  -2  12   5      0.56    0.10  0. 1.0000     0. 
   2  12  -5      0.53    0.09  0. 1.0000     0. 
   1  12  -5     38.96    1.25  0. 1.0000     0. 
  -1  12   5     38.25    1.24  0. 1.0000     0. 
  -1  12   5     38.04    1.18  0. 1.0000     0. 
   1  12  -5     39.08    1.19  0. 1.0000     0. 
   0  12   5      0.17    0.07  0. 1.0000     0. 
   0  12   5      0.13    0.06  0. 1.0000     0. 
   0  12   5      0.13    0.07  0. 1.0000     0. 
   0  12  -5      0.09    0.07  0. 1.0000     0. 
   0  12  -5      0.13    0.07  0. 1.0000     0. 
  -1  12  -5     15.54    0.45  0. 1.0000     0. 
   1  12   5     16.28    0.52  0. 1.0000     0. 
   1  12   5     16.62    0.57  0. 1.0000     0. 
   1  12   5     15.74    0.54  0. 1.0000     0. 
   1  12   5     15.60    0.56  0. 1.0000     0. 
  -1  12  -5     15.07    0.56  0. 1.0000     0. 
   2  12   5      1.40    0.11  0. 1.0000     0. 
  -2  12  -5      1.46    0.10  0. 1.0000     0. 
  -2  12  -5      1.70    0.15  0. 1.0000     0. 
  -3  12  -5      6.69    0.31  0. 1.0000     0. 
   3  12   5      6.64    0.26  0. 1.0000     0. 
  -3  12  -5      7.08    0.24  0. 1.0000     0. 
   4 -12   5      2.50    0.40  0. 1.0000     0. 
   4 -12   5      2.11    0.13  0. 1.0000     0. 
   4 -12   5      2.13    0.20  0. 1.0000     0. 
   4  12   5      2.23    0.13  0. 1.0000     0. 
   5 -12   5      3.66    0.22  0. 1.0000     0. 
   5 -12   5      3.38    0.14  0. 1.0000     0. 
   5  12   5      3.39    0.15  0. 1.0000     0. 
   6 -12   5      0.25    0.11  0. 1.0000     0. 
   6 -12   5      0.17    0.09  0. 1.0000     0. 
   6  12   5      0.31    0.04  0. 1.0000     0. 
   6  12   5      0.44    0.06  0. 1.0000     0. 
   7 -12   5      1.08    0.13  0. 1.0000     0. 
   7 -12   5      0.98    0.11  0. 1.0000     0. 
   7  12   5      0.98    0.05  0. 1.0000     0. 
   7  12   5      1.01    0.05  0. 1.0000     0. 
   8 -12   5      3.07    0.16  0. 1.0000     0. 
   8 -12   5      2.83    0.18  0. 1.0000     0. 
   7 -13  -5     27.94    0.92  0. 1.0000     0. 
   7  13  -5     28.85    0.86  0. 1.0000     0. 
   6 -13  -5      2.42    0.11  0. 1.0000     0. 
  -6  13   5      2.23    0.16  0. 1.0000     0. 
   6  13  -5      2.59    0.13  0. 1.0000     0. 
   5  13  -5      4.38    0.19  0. 1.0000     0. 
  -5  13   5      4.48    0.23  0. 1.0000     0. 
  -4  13   5      0.19    0.09  0. 1.0000     0. 
   4  13  -5      0.30    0.07  0. 1.0000     0. 
   4  13  -5      0.19    0.06  0. 1.0000     0. 
   3  13  -5     48.86    1.66  0. 1.0000     0. 
  -3  13   5     50.49    1.58  0. 1.0000     0. 
   3  13  -5     49.20    1.55  0. 1.0000     0. 
   3  13  -5     49.28    1.49  0. 1.0000     0. 
   3  13  -5     48.24    1.66  0. 1.0000     0. 
   2  13  -5      4.54    0.21  0. 1.0000     0. 
  -2  13   5      4.55    0.22  0. 1.0000     0. 
   2  13  -5      4.50    0.22  0. 1.0000     0. 
   2  13  -5      4.64    0.21  0. 1.0000     0. 
  -2  13   5      5.23    0.24  0. 1.0000     0. 
   1  13  -5      2.83    0.17  0. 1.0000     0. 
  -1  13   5      2.57    0.16  0. 1.0000     0. 
   1  13  -5      2.74    0.16  0. 1.0000     0. 
  -1  13   5      2.63    0.17  0. 1.0000     0. 
  -1  13   5      2.56    0.16  0. 1.0000     0. 
   0  13   5      3.27    0.18  0. 1.0000     0. 
   0  13   5      3.61    0.17  0. 1.0000     0. 
   0  13  -5      3.63    0.20  0. 1.0000     0. 
   0  13   5      3.76    0.19  0. 1.0000     0. 
   1  13   5      0.36    0.07  0. 1.0000     0. 
  -1  13  -5      0.25    0.09  0. 1.0000     0. 
   1  13   5      0.28    0.07  0. 1.0000     0. 
  -2  13  -5     13.49    0.40  0. 1.0000     0. 
  -2  13  -5     14.27    0.52  0. 1.0000     0. 
   2  13   5     14.83    0.47  0. 1.0000     0. 
   3 -13   5      4.49    0.52  0. 1.0000     0. 
  -3  13  -5      4.28    0.24  0. 1.0000     0. 
  -3  13  -5      4.33    0.16  0. 1.0000     0. 
   3  13   5      4.47    0.19  0. 1.0000     0. 
   4 -13   5      0.11    0.06  0. 1.0000     0. 
   4  13   5      0.05    0.05  0. 1.0000     0. 
  -4  13  -5      0.06    0.09  0. 1.0000     0. 
  -4  13  -5      0.00    0.05  0. 1.0000     0. 
   5 -13   5     17.01    0.46  0. 1.0000     0. 
   5 -13   5     16.49    0.61  0. 1.0000     0. 
   5 -13   5     15.96    0.59  0. 1.0000     0. 
  -5  13  -5     16.63    0.48  0. 1.0000     0. 
   5  13   5     16.79    0.53  0. 1.0000     0. 
   6 -13   5      3.71    0.22  0. 1.0000     0. 
   6 -13   5      3.64    0.21  0. 1.0000     0. 
   6  13   5      3.79    0.12  0. 1.0000     0. 
  -6  13  -5      3.93    0.15  0. 1.0000     0. 
   6  13   5      4.06    0.15  0. 1.0000     0. 
   6  13   5      3.92    0.12  0. 1.0000     0. 
   7 -13   5     -0.10    0.06  0. 1.0000     0. 
   7 -13   5      0.20    0.09  0. 1.0000     0. 
   7 -13   5      0.07    0.07  0. 1.0000     0. 
  -6  14   5      4.18    0.20  0. 1.0000     0. 
   6  14  -5      4.50    0.17  0. 1.0000     0. 
   5 -14  -5      2.86    0.14  0. 1.0000     0. 
  -5  14   5      3.31    0.19  0. 1.0000     0. 
   5  14  -5      3.42    0.15  0. 1.0000     0. 
  -4  14   5      3.66    0.20  0. 1.0000     0. 
   4  14  -5      3.52    0.17  0. 1.0000     0. 
   3  14  -5     46.84    1.41  0. 1.0000     0. 
   3  14  -5     44.75    1.46  0. 1.0000     0. 
  -3  14   5     47.55    1.48  0. 1.0000     0. 
  -2  14   5      0.58    0.10  0. 1.0000     0. 
   2  14  -5      0.51    0.07  0. 1.0000     0. 
   2  14  -5      0.48    0.08  0. 1.0000     0. 
   2  14  -5      0.42    0.08  0. 1.0000     0. 
  -2  14   5      0.51    0.08  0. 1.0000     0. 
   1  14  -5     14.71    0.56  0. 1.0000     0. 
   1  14  -5     14.92    0.53  0. 1.0000     0. 
  -1  14   5     15.24    0.53  0. 1.0000     0. 
   1  14  -5     15.00    0.51  0. 1.0000     0. 
  -1  14   5     15.52    0.55  0. 1.0000     0. 
  -1  14   5     15.30    0.51  0. 1.0000     0. 
   0  14  -5      0.65    0.10  0. 1.0000     0. 
   0  14   5      0.70    0.09  0. 1.0000     0. 
   0  14   5      0.73    0.07  0. 1.0000     0. 
   0  14   5      0.70    0.09  0. 1.0000     0. 
   0  14   5      0.58    0.06  0. 1.0000     0. 
  -1  14  -5     42.62    1.36  0. 1.0000     0. 
   1  14   5     39.79    1.32  0. 1.0000     0. 
   1  14   5     44.00    1.29  0. 1.0000     0. 
  -2  14  -5      1.65    0.16  0. 1.0000     0. 
   2  14   5      1.31    0.11  0. 1.0000     0. 
   3  14   5      7.09    0.27  0. 1.0000     0. 
  -3  14  -5      7.40    0.22  0. 1.0000     0. 
  -3  14  -5      7.83    0.32  0. 1.0000     0. 
   4 -14   5      1.36    0.09  0. 1.0000     0. 
   4  14   5      1.04    0.10  0. 1.0000     0. 
  -4  14  -5      1.16    0.12  0. 1.0000     0. 
  -4  14  -5      1.33    0.07  0. 1.0000     0. 
   5 -14   5      0.21    0.09  0. 1.0000     0. 
   5 -14   5      0.18    0.09  0. 1.0000     0. 
  -5  14  -5      0.06    0.04  0. 1.0000     0. 
   5  14   5      0.07    0.05  0. 1.0000     0. 
   6 -14   5      0.47    0.10  0. 1.0000     0. 
   6 -14   5      0.35    0.08  0. 1.0000     0. 
   6  14   5      0.50    0.05  0. 1.0000     0. 
   6  15  -5      2.09    0.10  0. 1.0000     0. 
   5  15  -5      7.97    0.28  0. 1.0000     0. 
  -5  15   5      8.29    0.31  0. 1.0000     0. 
   4  15  -5      0.05    0.05  0. 1.0000     0. 
   3  15  -5     11.04    0.38  0. 1.0000     0. 
  -3  15   5     11.34    0.41  0. 1.0000     0. 
   3  15  -5     11.28    0.39  0. 1.0000     0. 
   2  15  -5      1.23    0.11  0. 1.0000     0. 
   2  15  -5      1.26    0.12  0. 1.0000     0. 
  -2  15   5      1.04    0.10  0. 1.0000     0. 
  -2  15   5      1.13    0.11  0. 1.0000     0. 
  -1  15   5      7.06    0.27  0. 1.0000     0. 
  -1  15   5      7.45    0.27  0. 1.0000     0. 
   1  15  -5      6.77    0.28  0. 1.0000     0. 
   1  15  -5      6.61    0.27  0. 1.0000     0. 
  -1  15   5      6.56    0.28  0. 1.0000     0. 
   1  15  -5      7.17    0.28  0. 1.0000     0. 
  -1  15   5      6.58    0.26  0. 1.0000     0. 
   0  15   5      4.89    0.21  0. 1.0000     0. 
   0  15   5      4.99    0.21  0. 1.0000     0. 
   0  15  -5      4.57    0.23  0. 1.0000     0. 
  -1  15  -5      0.59    0.10  0. 1.0000     0. 
   1  15   5      0.48    0.07  0. 1.0000     0. 
  -2  15  -5      0.90    0.11  0. 1.0000     0. 
   2  15   5      0.95    0.09  0. 1.0000     0. 
   3  15   5      0.63    0.07  0. 1.0000     0. 
  -3  15  -5      0.54    0.09  0. 1.0000     0. 
   4 -15   5      0.11    0.05  0. 1.0000     0. 
   4  15   5      0.08    0.05  0. 1.0000     0. 
  -4  15  -5      0.03    0.07  0. 1.0000     0. 
   5 -15   5      3.69    0.20  0. 1.0000     0. 
   5  15   5      3.88    0.15  0. 1.0000     0. 
  -5  15  -5      3.80    0.19  0. 1.0000     0. 
  -4  16   5      0.18    0.06  0. 1.0000     0. 
   4  16  -5      0.13    0.05  0. 1.0000     0. 
  -3  16   5      6.01    0.24  0. 1.0000     0. 
   3  16  -5      6.75    0.24  0. 1.0000     0. 
  -3  16   5      6.65    0.26  0. 1.0000     0. 
   2  16  -5      2.09    0.13  0. 1.0000     0. 
  -2  16   5      2.24    0.13  0. 1.0000     0. 
   2  16  -5      2.06    0.12  0. 1.0000     0. 
  -1  16   5      7.82    0.30  0. 1.0000     0. 
   1  16  -5      8.84    0.31  0. 1.0000     0. 
   1  16  -5      7.98    0.30  0. 1.0000     0. 
  -1  16   5      8.42    0.30  0. 1.0000     0. 
   0  16  -5      9.92    0.36  0. 1.0000     0. 
   0  16   5      9.45    0.34  0. 1.0000     0. 
   0  16  -5      9.47    0.36  0. 1.0000     0. 
   1  16   5     22.62    0.69  0. 1.0000     0. 
  -1  16  -5     22.48    0.73  0. 1.0000     0. 
  -1  16  -5     21.08    0.78  0. 1.0000     0. 
   2  16   5      5.11    0.20  0. 1.0000     0. 
  -2  16  -5      5.10    0.23  0. 1.0000     0. 
   3  16   5     21.39    0.66  0. 1.0000     0. 
  -3  16  -5     21.09    0.70  0. 1.0000     0. 
  -4  16  -5      0.04    0.06  0. 1.0000     0. 
   4  16   5      0.23    0.05  0. 1.0000     0. 
  -2  17   5      1.15    0.09  0. 1.0000     0. 
   2  17  -5      1.29    0.09  0. 1.0000     0. 
   1  17  -5      2.77    0.13  0. 1.0000     0. 
  -1  17   5      2.86    0.14  0. 1.0000     0. 
   0  17  -5      0.97    0.09  0. 1.0000     0. 
   0  17   5      0.80    0.08  0. 1.0000     0. 
  -1  17  -5      1.61    0.11  0. 1.0000     0. 
   1  17   5      1.72    0.10  0. 1.0000     0. 
   2  17   5      1.01    0.08  0. 1.0000     0. 
  -2  17  -5      0.66    0.08  0. 1.0000     0. 
  -3  17  -5      0.06    0.05  0. 1.0000     0. 
   3  17   5      0.04    0.04  0. 1.0000     0. 
  11   0  -6      5.98    0.23  0. 1.0000     0. 
  10   0  -6     54.20    1.63  0. 1.0000     0. 
  10   0  -6     53.88    1.63  0. 1.0000     0. 
   9   0  -6     24.58    0.82  0. 1.0000     0. 
  -9   0   6     26.22    1.09  0. 1.0000     0. 
   9   0  -6     24.67    0.79  0. 1.0000     0. 
   9   0  -6     21.17    0.82  0. 1.0000     0. 
   9   0  -6     25.69    0.78  0. 1.0000     0. 
   9   0  -6     24.43    0.86  0. 1.0000     0. 
   8   0  -6     57.08    1.73  0. 1.0000     0. 
   8   0  -6     58.66    1.90  0. 1.0000     0. 
   8   0  -6     56.56    1.94  0. 1.0000     0. 
  -8   0   6     52.80    2.24  0. 1.0000     0. 
  -8   0   6     59.15    2.14  0. 1.0000     0. 
   8   0  -6     57.58    1.80  0. 1.0000     0. 
  -7   0   6     22.30    1.04  0. 1.0000     0. 
   7   0  -6     20.24    0.94  0. 1.0000     0. 
  -7   0   6     21.20    0.95  0. 1.0000     0. 
  -6   0   6    128.69    4.50  0. 1.0000     0. 
   6   0  -6    129.33    4.39  0. 1.0000     0. 
  -6   0   6    124.70    4.30  0. 1.0000     0. 
  -5   0   6      0.76    0.19  0. 1.0000     0. 
   5   0  -6      0.59    0.16  0. 1.0000     0. 
   5   0  -6      0.77    0.14  0. 1.0000     0. 
   4   0  -6      0.08    0.09  0. 1.0000     0. 
  -4   0   6      0.67    0.17  0. 1.0000     0. 
   4   0  -6      0.09    0.11  0. 1.0000     0. 
   3   0  -6      3.71    0.24  0. 1.0000     0. 
  -3   0   6      3.36    0.27  0. 1.0000     0. 
  -3   0   6      3.69    0.26  0. 1.0000     0. 
  -2   0   6     63.40    2.49  0. 1.0000     0. 
  -2   0   6     67.39    2.84  0. 1.0000     0. 
  -2   0   6     67.81    2.29  0. 1.0000     0. 
   2   0  -6     62.74    2.49  0. 1.0000     0. 
  -2   0   6     68.87    2.68  0. 1.0000     0. 
   2   0  -6     66.63    2.84  0. 1.0000     0. 
  -1   0   6    135.78    5.07  0. 1.0000     0. 
   1   0  -6    137.94    5.78  0. 1.0000     0. 
  -1   0   6    139.77    5.43  0. 1.0000     0. 
   0   0  -6    108.28    4.29  0. 1.0000     0. 
   0   0   6    111.03    3.69  0. 1.0000     0. 
  -1   0  -6    235.71    9.24  0. 1.0000     0. 
   1   0   6    236.87    7.87  0. 1.0000     0. 
   2   0   6     14.30    0.58  0. 1.0000     0. 
  -4   0  -6    103.23    4.26  0. 1.0000     0. 
   4   0   6     99.03    3.44  0. 1.0000     0. 
   5   0   6      4.11    0.30  0. 1.0000     0. 
   5   0   6      4.02    0.30  0. 1.0000     0. 
   6   0   6      0.46    0.16  0. 1.0000     0. 
   6   0   6      0.37    0.15  0. 1.0000     0. 
   7   0   6      0.15    0.07  0. 1.0000     0. 
   7   0   6      0.02    0.15  0. 1.0000     0. 
   8   0   6      5.36    0.24  0. 1.0000     0. 
   8   0   6      4.66    0.21  0. 1.0000     0. 
   8   0   6      5.22    0.45  0. 1.0000     0. 
   9   0   6      2.05    0.16  0. 1.0000     0. 
   9   0   6      1.39    0.12  0. 1.0000     0. 
  -9   0  -6      1.49    0.26  0. 1.0000     0. 
  10   0   6      0.51    0.07  0. 1.0000     0. 
  11   0   6      3.79    0.15  0. 1.0000     0. 
  11  -1  -6      0.22    0.06  0. 1.0000     0.
[truncated: 1,236,782 more chars]
