# Supplementary material for: Positional Isomerism in the N^N Ligand: How Much Difference Does a Methyl Group Make in [Cu(P^P)(N^N)]+ Complexes?
Source: Molecules. 2020 Jun 15;25(12):2760. doi: 10.3390/molecules25122760 (PMC7356218; doi:10.3390/molecules25122760)
Supplement: Supplementary file 1 [file molecules-25-02760-s001.zip › BRF214_130K_0m.cif]

data_brf214_130k_0m
_audit_creation_date               2019-01-30
_audit_creation_method
;
Olex2 1.2
(compiled May 18 2018 14:05:52 for OlexSys, GUI svn.r5506)
;
_shelx_SHELXL_version_number       '2014/7'
_audit_contact_author_name       'Alessandro Prescimone'
_publ_contact_author_name        'Alessandro Prescimone'
_publ_contact_author_address     'University of Basel'
_publ_contact_author_email       'alessandro.prescimone@unibas.ch'
_publ_contact_author_id_orcid    'https://orcid.org/0000-0002-3631-5210'
_publ_section_references
;
Dolomanov, O.V., Bourhis, L.J., Gildea, R.J, Howard, J.A.K. & Puschmann, H.
 (2009), J. Appl. Cryst. 42, 339-341.

Sheldrick, G.M. (2015). Acta Cryst. A71, 3-8.

Sheldrick, G.M. (2015). Acta Cryst. C71, 3-8.
;
_chemical_name_common              ?
_chemical_name_systematic          ?
_chemical_formula_moiety          
 'C51 H44 Cu N2 O P2, F6 P, 0.5(CH2Cl2), 0.75[C4H10O1]'
_chemical_formula_sum              'C54.50 H52.50 Cl Cu F6 N2 O1.75 P3'
_chemical_formula_weight           1069.38
_chemical_compound_source          'Fabian Brunner'
_chemical_melting_point            ?
loop_
  _atom_type_symbol
  _atom_type_description
  _atom_type_scat_dispersion_real
  _atom_type_scat_dispersion_imag
  _atom_type_scat_source
 'C' 'C' 0.0181 0.0091 'International Tables Vol C Tables 4.2.6.8 and 6.1.1.4'
 'Cl' 'Cl' 0.3639 0.7018 'International Tables Vol C Tables 4.2.6.8 and 6.1.1.4'
 'Cu' 'Cu' -1.9646 0.5888
 'International Tables Vol C Tables 4.2.6.8 and 6.1.1.4'
 'F' 'F' 0.0727 0.0534 'International Tables Vol C Tables 4.2.6.8 and 6.1.1.4'
 'H' 'H' 0.0000 0.0000 'International Tables Vol C Tables 4.2.6.8 and 6.1.1.4'
 'N' 'N' 0.0311 0.0180 'International Tables Vol C Tables 4.2.6.8 and 6.1.1.4'
 'O' 'O' 0.0492 0.0322 'International Tables Vol C Tables 4.2.6.8 and 6.1.1.4'
 'P' 'P' 0.2955 0.4335 'International Tables Vol C Tables 4.2.6.8 and 6.1.1.4'

_shelx_space_group_comment
;
The symmetry employed for this shelxl refinement is uniquely defined
by the following loop, which should always be used as a source of
symmetry information in preference to the above space-group names.
They are only intended as comments.
;
_space_group_crystal_system        'monoclinic'
_space_group_IT_number             14
_space_group_name_H-M_alt          'P 1 21/n 1'
_space_group_name_Hall             '-P 2yn'
loop_
  _space_group_symop_operation_xyz
 'x, y, z'
 '-x+1/2, y+1/2, -z+1/2'
 '-x, -y, -z'
 'x-1/2, -y-1/2, z-1/2'

_cell_length_a                     17.6502(15)
_cell_length_b                     16.8504(15)
_cell_length_c                     18.4582(16)
_cell_angle_alpha                  90
_cell_angle_beta                   104.685(3)
_cell_angle_gamma                  90
_cell_volume                       5310.4(8)
_cell_formula_units_Z              4
_cell_measurement_reflns_used      9187
_cell_measurement_temperature      130
_cell_measurement_theta_max        69.07
_cell_measurement_theta_min        4.06
_shelx_estimated_absorpt_T_max     0.713
_shelx_estimated_absorpt_T_min     0.572
_exptl_absorpt_coefficient_mu      2.422
_exptl_absorpt_correction_T_max    0.7532
_exptl_absorpt_correction_T_min    0.6114
_exptl_absorpt_correction_type     'multi scan'
_exptl_absorpt_process_details
;
SADABS-2012/1 (Bruker,2012) was used for absorption correction.
wR2(int) was 0.0695 before and 0.0426 after correction.
The Ratio of minimum to maximum transmission is 0.8117.
The \l/2 correction factor is 0.0015.
;
_exptl_absorpt_special_details     ?
_exptl_crystal_colour              yellow
_exptl_crystal_colour_primary      yellow
_exptl_crystal_density_diffrn      1.338
_exptl_crystal_density_meas        ?
_exptl_crystal_density_method      ?
_exptl_crystal_description         'block'
_exptl_crystal_F_000               2210
_exptl_crystal_size_max            0.26
_exptl_crystal_size_mid            0.25
_exptl_crystal_size_min            0.15
_exptl_transmission_factor_max     ?
_exptl_transmission_factor_min     ?
_diffrn_reflns_av_R_equivalents    0.0319
_diffrn_reflns_av_unetI/netI       0.0189
_diffrn_reflns_Laue_measured_fraction_full  0.989
_diffrn_reflns_Laue_measured_fraction_max  0.970
_diffrn_reflns_limit_h_max         20
_diffrn_reflns_limit_h_min         -21
_diffrn_reflns_limit_k_max         19
_diffrn_reflns_limit_k_min         -20
_diffrn_reflns_limit_l_max         21
_diffrn_reflns_limit_l_min         -21
_diffrn_reflns_number              55278
_diffrn_reflns_point_group_measured_fraction_full  0.989
_diffrn_reflns_point_group_measured_fraction_max  0.970
_diffrn_reflns_theta_full          67.679
_diffrn_reflns_theta_max           69.064
_diffrn_reflns_theta_min           3.607
_diffrn_ambient_temperature        130
_diffrn_detector_area_resol_mean   ?
_diffrn_measured_fraction_theta_full  0.989
_diffrn_measured_fraction_theta_max  0.970
_diffrn_measurement_device         Area
_diffrn_measurement_device_type    'Bruker APEX-II CCD'
_diffrn_measurement_method         '\f and \w scans'
_diffrn_radiation_monochromator    graphite
_diffrn_radiation_probe            x-ray
_diffrn_radiation_type             CuK\a
_diffrn_radiation_wavelength       1.54178
_diffrn_source                     ?
_diffrn_standards_number           0
_reflns_Friedel_coverage           0.000
_reflns_Friedel_fraction_full      .
_reflns_Friedel_fraction_max       .
_reflns_number_gt                  8839
_reflns_number_total               9603
_reflns_special_details
;
 Reflections were merged by SHELXL according to the crystal
 class for the calculation of statistics and refinement.
 
 Structure factors included contributions from the .fab file.
 
 _reflns_Friedel_fraction is defined as the number of unique
 Friedel pairs measured divided by the number that would be
 possible theoretically, ignoring centric projections and
 systematic absences.
;
_reflns_threshold_expression       'I > 2\s(I)'
_computing_cell_refinement         'SAINT v8.34A (Bruker, 2013)'
_computing_data_collection         'Apex2 (Bruker AXS, 2006)'
_computing_data_reduction          'SAINT v8.34A (Bruker, 2013)'
_computing_molecular_graphics      'Olex2 (Dolomanov et al., 2009)'
_computing_publication_material    'Olex2 (Dolomanov et al., 2009)'
_computing_structure_refinement    'ShelXL (Sheldrick, 2015)'
_computing_structure_solution      'ShelXT (Sheldrick, 2015)'
_refine_diff_density_max           1.864
_refine_diff_density_min           -0.736
_refine_diff_density_rms           0.094
_refine_ls_extinction_coef         .
_refine_ls_extinction_method       none
_refine_ls_goodness_of_fit_ref     1.025
_refine_ls_hydrogen_treatment      constr
_refine_ls_matrix_type             full
_refine_ls_number_parameters       608
_refine_ls_number_reflns           9603
_refine_ls_number_restraints       18
_refine_ls_R_factor_all            0.0575
_refine_ls_R_factor_gt             0.0544
_refine_ls_restrained_S_all        1.024
_refine_ls_shift/su_max            0.001
_refine_ls_shift/su_mean           0.000
_refine_ls_structure_factor_coef   Fsqd
_refine_ls_weighting_details      
 'w=1/[\s^2^(Fo^2^)+(0.1144P)^2^+7.0093P] where P=(Fo^2^+2Fc^2^)/3'
_refine_ls_weighting_scheme        calc
_refine_ls_wR_factor_gt            0.1728
_refine_ls_wR_factor_ref           0.1768
_refine_special_details           
;
Squeeze was used to treat part of the solvent region and an extra 0.75 (Et2O)
was found that sums with the 0.5 (CH2Cl2) that could be refined
;

_olex2_refinement_description
;
1. Fixed Uiso
 At 1.2 times of:
  All C(H) groups, All C(H,H) groups
 At 1.5 times of:
  All C(H,H,H) groups
2. Uiso/Uaniso restraints and constraints
Uanis(Cl2) \\sim Ueq, Uanis(C52) \\sim Ueq, Uanis(Cl1) \\sim Ueq: with sigma of
0.1 and sigma for terminal atoms of 0.2
3. Others
 Fixed Sof: Cl1(0.5) Cl2(0.5) C52(0.5) H52A(0.5) H52B(0.5)
4.a Secondary CH2 refined with riding coordinates:
 C52(H52A,H52B)
4.b Aromatic/amide H refined with riding coordinates:
 C25(H25), C27(H27), C44(H44), C26(H26), C14(H14), C35(H35), C51(H51),
 C33(H33), C15(H15), C39(H39), C43(H43), C16(H16), C42(H42), C38(H38), C6(H6),
 C37(H37), C47(H47), C2(H2), C12(H12), C8(H8), C29(H29), C5(H5), C32(H32),
 C4(H4), C31(H31), C36(H36), C3(H3), C48(H48), C10(H10), C9(H9), C30(H30),
 C11(H11)
4.c Idealised Me refined as rotating group:
 C20(H20A,H20B,H20C), C40(H40A,H40B,H40C), C21(H21A,H21B,H21C), C50(H50A,H50B,
 H50C)
;
_atom_sites_solution_hydrogens     geom
_atom_sites_solution_primary       dual
_atom_sites_solution_secondary     ?
loop_
  _atom_site_label
  _atom_site_type_symbol
  _atom_site_fract_x
  _atom_site_fract_y
  _atom_site_fract_z
  _atom_site_U_iso_or_equiv
  _atom_site_adp_type
  _atom_site_occupancy
  _atom_site_site_symmetry_order
  _atom_site_calc_flag
  _atom_site_refinement_flags_posn
  _atom_site_refinement_flags_adp
  _atom_site_refinement_flags_occupancy
  _atom_site_disorder_assembly
  _atom_site_disorder_group
 Cu1 Cu 0.31235(2) 0.41437(2) 0.61570(2) 0.02794(14) Uani 1 1 d . . . . .
 P2 P 0.19067(4) 0.46156(4) 0.56602(4) 0.02766(17) Uani 1 1 d . . . . .
 P1 P 0.36922(4) 0.34487(4) 0.53975(4) 0.02962(18) Uani 1 1 d . . . . .
 P3 P 0.18893(5) 0.86119(5) 0.44066(4) 0.0373(2) Uani 1 1 d . . . . .
 O1 O 0.20428(11) 0.30755(11) 0.49677(10) 0.0290(4) Uani 1 1 d . . . . .
 F1 F 0.11866(13) 0.82403(12) 0.37692(11) 0.0511(5) Uani 1 1 d . . . . .
 F5 F 0.12519(11) 0.88939(12) 0.48470(10) 0.0471(4) Uani 1 1 d . . . . .
 F3 F 0.17731(12) 0.94424(11) 0.39740(11) 0.0469(5) Uani 1 1 d . . . . .
 F6 F 0.25648(12) 0.89887(13) 0.50609(13) 0.0591(6) Uani 1 1 d . . . . .
 F4 F 0.19823(17) 0.77913(12) 0.48510(12) 0.0674(7) Uani 1 1 d . . . . .
 N1 N 0.38696(13) 0.47174(14) 0.70350(13) 0.0296(5) Uani 1 1 d . . . . .
 F2 F 0.24921(15) 0.83279(16) 0.39599(15) 0.0721(7) Uani 1 1 d . . . . .
 N2 N 0.29880(13) 0.34308(14) 0.70524(13) 0.0303(5) Uani 1 1 d . . . . .
 C45 C 0.38600(16) 0.44249(17) 0.77166(16) 0.0305(6) Uani 1 1 d . . . . .
 C34 C 0.16706(16) 0.50643(17) 0.47293(16) 0.0311(6) Uani 1 1 d . . . . .
 C24 C 0.12145(15) 0.37896(17) 0.55695(15) 0.0289(5) Uani 1 1 d . . . . .
 C23 C 0.13794(15) 0.30831(17) 0.52480(15) 0.0288(5) Uani 1 1 d . . . . .
 C46 C 0.33185(16) 0.37563(17) 0.77250(16) 0.0317(6) Uani 1 1 d . . . . .
 C25 C 0.05604(17) 0.38016(18) 0.58647(17) 0.0347(6) Uani 1 1 d . . . . .
 H25 H 0.0425 0.4275 0.6082 0.042 Uiso 1 1 calc R . . . .
 C18 C 0.24685(17) 0.23742(17) 0.51080(15) 0.0302(6) Uani 1 1 d . . . . .
 C28 C 0.15186(16) 0.53254(18) 0.62273(17) 0.0342(6) Uani 1 1 d . . . . .
 C41 C 0.43762(17) 0.52988(18) 0.69896(17) 0.0352(6) Uani 1 1 d . . . . .
 C22 C 0.09359(16) 0.23971(17) 0.52114(15) 0.0315(6) Uani 1 1 d . . . . .
 C27 C 0.02909(17) 0.24283(18) 0.55192(17) 0.0363(6) Uani 1 1 d . . . . .
 H27 H -0.0025 0.1970 0.5508 0.044 Uiso 1 1 calc R . . . .
 C44 C 0.43489(18) 0.47292(19) 0.83711(17) 0.0372(7) Uani 1 1 d . . . . .
 H44 H 0.4325 0.4528 0.8846 0.045 Uiso 1 1 calc R . . . .
 C19 C 0.11869(18) 0.16662(17) 0.48405(16) 0.0337(6) Uani 1 1 d . . . . .
 C26 C 0.01063(17) 0.31231(19) 0.58418(18) 0.0386(7) Uani 1 1 d . . . . .
 H26 H -0.0334 0.3135 0.6049 0.046 Uiso 1 1 calc R . . . .
 C14 C 0.37203(19) 0.1748(2) 0.54543(18) 0.0399(7) Uani 1 1 d . . . . .
 H14 H 0.4276 0.1772 0.5579 0.048 Uiso 1 1 calc R . . . .
 C17 C 0.20834(18) 0.16543(18) 0.50700(16) 0.0339(6) Uani 1 1 d . . . . .
 C35 C 0.11477(19) 0.4726(2) 0.41193(17) 0.0405(7) Uani 1 1 d . . . . .
 H35 H 0.0899 0.4238 0.4178 0.049 Uiso 1 1 calc R . . . .
 C7 C 0.35729(16) 0.3748(2) 0.44249(17) 0.0378(7) Uani 1 1 d . . . . .
 C51 C 0.25078(17) 0.28160(18) 0.70265(17) 0.0359(6) Uani 1 1 d . . . . .
 H51 H 0.2288 0.2580 0.6552 0.043 Uiso 1 1 calc R . . . .
 C13 C 0.32841(17) 0.24476(18) 0.53033(15) 0.0328(6) Uani 1 1 d . . . . .
 C1 C 0.47382(16) 0.32516(18) 0.57689(17) 0.0350(6) Uani 1 1 d . . . . .
 C33 C 0.10197(18) 0.59462(19) 0.5929(2) 0.0416(7) Uani 1 1 d . . . . .
 H33 H 0.0872 0.6031 0.5403 0.050 Uiso 1 1 calc R . . . .
 C15 C 0.3349(2) 0.1017(2) 0.54245(19) 0.0449(8) Uani 1 1 d . . . . .
 H15 H 0.3653 0.0547 0.5536 0.054 Uiso 1 1 calc R . . . .
 C49 C 0.23066(19) 0.2498(2) 0.76451(18) 0.0428(7) Uani 1 1 d . . . . .
 C39 C 0.20311(18) 0.57771(19) 0.46305(19) 0.0395(7) Uani 1 1 d . . . . .
 H39 H 0.2398 0.6012 0.5041 0.047 Uiso 1 1 calc R . . . .
 C43 C 0.48653(18) 0.53229(19) 0.83229(18) 0.0412(7) Uani 1 1 d . . . . .
 H43 H 0.5207 0.5533 0.8764 0.049 Uiso 1 1 calc R . . . .
 C16 C 0.2538(2) 0.09689(19) 0.52336(18) 0.0408(7) Uani 1 1 d . . . . .
 H16 H 0.2291 0.0466 0.5214 0.049 Uiso 1 1 calc R . . . .
 C42 C 0.48852(18) 0.56122(19) 0.76295(19) 0.0396(7) Uani 1 1 d . . . . .
 H42 H 0.5242 0.6021 0.7588 0.048 Uiso 1 1 calc R . . . .
 C38 C 0.1857(2) 0.6148(2) 0.3934(2) 0.0453(8) Uani 1 1 d . . . . .
 H38 H 0.2093 0.6642 0.3873 0.054 Uiso 1 1 calc R . . . .
 C20 C 0.0917(2) 0.17692(19) 0.39796(17) 0.0397(7) Uani 1 1 d . . . . .
 H20A H 0.0344 0.1794 0.3823 0.060 Uiso 1 1 calc GR . . . .
 H20B H 0.1100 0.1317 0.3735 0.060 Uiso 1 1 calc GR . . . .
 H20C H 0.1137 0.2261 0.3835 0.060 Uiso 1 1 calc GR . . . .
 C6 C 0.52496(18) 0.3100(2) 0.53186(19) 0.0440(8) Uani 1 1 d . . . . .
 H6 H 0.5068 0.3135 0.4789 0.053 Uiso 1 1 calc R . . . .
 C40 C 0.4376(2) 0.5596(2) 0.6224(2) 0.0463(8) Uani 1 1 d . . . . .
 H40A H 0.4577 0.5180 0.5951 0.069 Uiso 1 1 calc GR . . . .
 H40B H 0.4710 0.6067 0.6270 0.069 Uiso 1 1 calc GR . . . .
 H40C H 0.3840 0.5733 0.5952 0.069 Uiso 1 1 calc GR . . . .
 C21 C 0.0844(2) 0.09029(18) 0.50691(19) 0.0416(7) Uani 1 1 d . . . . .
 H21A H 0.1034 0.0828 0.5611 0.062 Uiso 1 1 calc GR . . . .
 H21B H 0.1006 0.0451 0.4809 0.062 Uiso 1 1 calc GR . . . .
 H21C H 0.0271 0.0939 0.4933 0.062 Uiso 1 1 calc GR . . . .
 C37 C 0.1340(2) 0.5795(2) 0.3332(2) 0.0482(8) Uani 1 1 d . . . . .
 H37 H 0.1230 0.6040 0.2853 0.058 Uiso 1 1 calc R . . . .
 C47 C 0.3149(2) 0.3476(2) 0.83727(18) 0.0457(8) Uani 1 1 d . . . . .
 H47 H 0.3384 0.3713 0.8843 0.055 Uiso 1 1 calc R . . . .
 C2 C 0.50175(19) 0.3203(2) 0.65390(18) 0.0464(8) Uani 1 1 d . . . . .
 H2 H 0.4675 0.3307 0.6850 0.056 Uiso 1 1 calc R . . . .
 C12 C 0.3509(2) 0.4543(2) 0.4250(2) 0.0523(9) Uani 1 1 d . . . . .
 H12 H 0.3544 0.4925 0.4635 0.063 Uiso 1 1 calc R . . . .
 C8 C 0.3530(2) 0.3190(3) 0.38531(19) 0.0516(8) Uani 1 1 d . . . . .
 H8 H 0.3582 0.2640 0.3969 0.062 Uiso 1 1 calc R . . . .
 C29 C 0.1728(2) 0.5222(3) 0.7004(2) 0.0549(10) Uani 1 1 d . . . . .
 H29 H 0.2076 0.4806 0.7219 0.066 Uiso 1 1 calc R . . . .
 C5 C 0.60230(19) 0.2899(3) 0.5644(2) 0.0531(9) Uani 1 1 d . . . . .
 H5 H 0.6370 0.2796 0.5337 0.064 Uiso 1 1 calc R . . . .
 C32 C 0.0737(2) 0.6443(2) 0.6399(2) 0.0542(9) Uani 1 1 d . . . . .
 H32 H 0.0392 0.6863 0.6189 0.065 Uiso 1 1 calc R . . . .
 C4 C 0.6290(2) 0.2847(3) 0.6416(2) 0.0536(9) Uani 1 1 d . . . . .
 H4 H 0.6819 0.2704 0.6637 0.064 Uiso 1 1 calc R . . . .
 C31 C 0.0943(2) 0.6341(3) 0.7155(2) 0.0613(11) Uani 1 1 d . . . . .
 H31 H 0.0753 0.6693 0.7471 0.074 Uiso 1 1 calc R . . . .
 C36 C 0.0983(2) 0.5089(2) 0.34246(19) 0.0501(8) Uani 1 1 d . . . . .
 H36 H 0.0623 0.4851 0.3011 0.060 Uiso 1 1 calc R . . . .
 C3 C 0.5792(2) 0.3003(3) 0.6861(2) 0.0567(10) Uani 1 1 d . . . . .
 H3 H 0.5977 0.2973 0.7390 0.068 Uiso 1 1 calc R . . . .
 C50 C 0.1741(3) 0.1808(3) 0.7562(2) 0.0605(10) Uani 1 1 d . . . . .
 H50A H 0.1216 0.2008 0.7547 0.091 Uiso 1 1 calc GR . . . .
 H50B H 0.1912 0.1447 0.7988 0.091 Uiso 1 1 calc GR . . . .
 H50C H 0.1728 0.1523 0.7096 0.091 Uiso 1 1 calc GR . . . .
 Cl1 Cl 0.0893(2) 0.4192(2) 0.8129(3) 0.1223(12) Uani 0.5 1 d . U P . .
 C48 C 0.2634(2) 0.2849(2) 0.83273(19) 0.0529(9) Uani 1 1 d . . . . .
 H48 H 0.2505 0.2661 0.8766 0.064 Uiso 1 1 calc R . . . .
 C10 C 0.3340(2) 0.4241(3) 0.2947(2) 0.0682(13) Uani 1 1 d . . . . .
 H10 H 0.3253 0.4411 0.2442 0.082 Uiso 1 1 calc R . . . .
 C9 C 0.3412(3) 0.3443(3) 0.3116(2) 0.0638(11) Uani 1 1 d . . . . .
 H9 H 0.3380 0.3065 0.2728 0.077 Uiso 1 1 calc R . . . .
 C30 C 0.1434(3) 0.5718(3) 0.7460(2) 0.0707(13) Uani 1 1 d . . . . .
 H30 H 0.1568 0.5632 0.7986 0.085 Uiso 1 1 calc R . . . .
 Cl2 Cl 0.0131(4) 0.2745(2) 0.8330(4) 0.171(2) Uani 0.5 1 d . U P . .
 C11 C 0.3394(3) 0.4791(3) 0.3509(2) 0.0673(12) Uani 1 1 d . . . . .
 H11 H 0.3353 0.5341 0.3392 0.081 Uiso 1 1 calc R . . . .
 C52 C 0.0451(8) 0.3657(7) 0.8734(6) 0.103(5) Uani 0.5 1 d . U P A 1
 H52A H 0.0834 0.3574 0.9223 0.124 Uiso 0.5 1 calc R . P A 1
 H52B H 0.0002 0.3960 0.8822 0.124 Uiso 0.5 1 calc R . P A 1

loop_
  _atom_site_aniso_label
  _atom_site_aniso_U_11
  _atom_site_aniso_U_22
  _atom_site_aniso_U_33
  _atom_site_aniso_U_23
  _atom_site_aniso_U_13
  _atom_site_aniso_U_12
 Cu1 0.0224(2) 0.0345(2) 0.0257(2) -0.00142(15) 0.00399(16) 0.00124(15)
 P2 0.0223(3) 0.0307(4) 0.0286(3) -0.0041(3) 0.0037(3) 0.0019(2)
 P1 0.0230(3) 0.0396(4) 0.0265(3) 0.0004(3) 0.0066(3) 0.0036(3)
 P3 0.0422(4) 0.0338(4) 0.0351(4) 0.0030(3) 0.0086(3) 0.0101(3)
 O1 0.0264(9) 0.0317(10) 0.0295(9) -0.0022(7) 0.0081(7) 0.0004(7)
 F1 0.0618(12) 0.0452(10) 0.0407(10) -0.0024(8) 0.0027(9) 0.0011(9)
 F5 0.0467(11) 0.0575(11) 0.0387(10) 0.0045(8) 0.0139(8) 0.0033(9)
 F3 0.0527(11) 0.0401(10) 0.0509(11) 0.0115(8) 0.0185(9) 0.0051(8)
 F6 0.0434(11) 0.0585(13) 0.0640(14) -0.0027(10) -0.0074(10) 0.0057(9)
 F4 0.1073(19) 0.0374(11) 0.0473(12) 0.0086(9) 0.0006(12) 0.0139(11)
 N1 0.0229(11) 0.0341(12) 0.0300(12) -0.0039(9) 0.0035(9) 0.0026(9)
 F2 0.0633(14) 0.0870(17) 0.0731(15) -0.0022(13) 0.0304(12) 0.0341(13)
 N2 0.0281(11) 0.0337(12) 0.0279(11) 0.0003(9) 0.0048(9) 0.0023(9)
 C45 0.0235(13) 0.0355(14) 0.0302(14) -0.0042(11) 0.0028(10) 0.0061(11)
 C34 0.0249(13) 0.0342(14) 0.0343(14) -0.0003(11) 0.0079(11) 0.0066(11)
 C24 0.0234(12) 0.0337(14) 0.0277(13) -0.0005(11) 0.0027(10) 0.0008(10)
 C23 0.0233(12) 0.0373(14) 0.0247(13) -0.0005(10) 0.0040(10) 0.0020(11)
 C46 0.0272(13) 0.0373(15) 0.0292(14) -0.0001(11) 0.0047(11) 0.0060(11)
 C25 0.0291(14) 0.0384(15) 0.0369(15) -0.0022(12) 0.0091(12) 0.0048(12)
 C18 0.0325(14) 0.0340(14) 0.0244(12) -0.0029(10) 0.0078(11) 0.0042(11)
 C28 0.0246(13) 0.0385(15) 0.0374(15) -0.0116(12) 0.0041(11) 0.0012(11)
 C41 0.0281(14) 0.0369(15) 0.0402(16) -0.0037(12) 0.0080(12) 0.0013(11)
 C22 0.0284(13) 0.0362(15) 0.0277(13) -0.0015(11) 0.0033(11) -0.0008(11)
 C27 0.0298(14) 0.0389(16) 0.0402(16) 0.0004(12) 0.0088(12) -0.0044(12)
 C44 0.0345(15) 0.0408(16) 0.0316(15) -0.0051(12) -0.0004(12) 0.0077(12)
 C19 0.0368(15) 0.0333(14) 0.0303(14) -0.0042(11) 0.0069(12) -0.0032(12)
 C26 0.0283(14) 0.0470(17) 0.0433(17) -0.0006(13) 0.0140(12) -0.0003(12)
 C14 0.0341(15) 0.0461(17) 0.0398(16) -0.0032(13) 0.0098(13) 0.0085(13)
 C17 0.0388(15) 0.0370(15) 0.0263(13) -0.0060(11) 0.0093(11) 0.0018(12)
 C35 0.0400(16) 0.0441(17) 0.0344(15) -0.0007(13) 0.0040(13) -0.0018(13)
 C7 0.0237(13) 0.0594(19) 0.0312(15) 0.0068(13) 0.0086(11) 0.0066(13)
 C51 0.0341(15) 0.0388(15) 0.0314(14) 0.0021(12) 0.0022(12) -0.0022(12)
 C13 0.0319(14) 0.0398(15) 0.0279(13) -0.0036(11) 0.0099(11) 0.0039(12)
 C1 0.0253(13) 0.0434(16) 0.0358(15) 0.0002(12) 0.0071(11) 0.0046(12)
 C33 0.0318(15) 0.0404(16) 0.0511(19) -0.0102(14) 0.0076(13) 0.0038(12)
 C15 0.0479(19) 0.0402(17) 0.0464(18) -0.0014(14) 0.0113(15) 0.0136(14)
 C49 0.0405(17) 0.0477(18) 0.0388(17) 0.0063(14) 0.0073(13) -0.0039(14)
 C39 0.0320(15) 0.0389(16) 0.0468(18) 0.0009(13) 0.0083(13) 0.0008(12)
 C43 0.0332(15) 0.0421(17) 0.0410(17) -0.0112(13) -0.0041(13) 0.0010(13)
 C16 0.0493(18) 0.0339(15) 0.0403(17) -0.0037(12) 0.0132(14) 0.0032(13)
 C42 0.0296(15) 0.0376(16) 0.0494(18) -0.0084(13) 0.0060(13) -0.0027(12)
 C38 0.0429(18) 0.0423(17) 0.055(2) 0.0103(15) 0.0215(16) 0.0082(14)
 C20 0.0456(17) 0.0396(16) 0.0314(15) -0.0064(12) 0.0051(13) -0.0046(13)
 C6 0.0303(15) 0.066(2) 0.0379(16) 0.0063(15) 0.0127(13) 0.0073(14)
 C40 0.0458(18) 0.0477(18) 0.0448(18) -0.0001(15) 0.0105(15) -0.0120(15)
 C21 0.0462(18) 0.0349(16) 0.0438(18) -0.0038(13) 0.0116(14) -0.0057(13)
 C37 0.053(2) 0.055(2) 0.0400(18) 0.0114(15) 0.0197(16) 0.0174(16)
 C47 0.0478(19) 0.060(2) 0.0277(15) -0.0015(14) 0.0058(13) -0.0059(16)
 C2 0.0321(16) 0.071(2) 0.0356(16) -0.0057(15) 0.0072(13) 0.0158(15)
 C12 0.058(2) 0.061(2) 0.0428(18) 0.0099(16) 0.0220(16) 0.0191(18)
 C8 0.054(2) 0.065(2) 0.0379(18) -0.0031(16) 0.0149(15) -0.0054(17)
 C29 0.0480(19) 0.074(2) 0.0391(18) -0.0127(17) 0.0036(15) 0.0223(18)
 C5 0.0307(16) 0.080(3) 0.052(2) 0.0036(18) 0.0164(15) 0.0124(16)
 C32 0.0424(18) 0.0452(19) 0.074(3) -0.0184(17) 0.0127(17) 0.0077(15)
 C4 0.0288(16) 0.080(3) 0.049(2) -0.0028(18) 0.0043(14) 0.0139(16)
 C31 0.049(2) 0.068(3) 0.068(3) -0.035(2) 0.0162(19) 0.0053(18)
 C36 0.054(2) 0.058(2) 0.0351(17) -0.0009(15) 0.0044(15) 0.0046(17)
 C3 0.0399(18) 0.088(3) 0.0379(18) -0.0069(18) 0.0012(14) 0.0200(18)
 C50 0.064(2) 0.064(2) 0.053(2) 0.0097(18) 0.0116(18) -0.024(2)
 Cl1 0.108(2) 0.107(2) 0.152(3) 0.029(2) 0.032(2) -0.0055(19)
 C48 0.054(2) 0.071(2) 0.0348(17) 0.0090(16) 0.0122(15) -0.0134(18)
 C10 0.053(2) 0.121(4) 0.0336(19) 0.019(2) 0.0149(16) 0.025(2)
 C9 0.062(2) 0.094(3) 0.0369(19) -0.005(2) 0.0140(17) -0.002(2)
 C30 0.059(2) 0.106(4) 0.043(2) -0.029(2) 0.0067(18) 0.021(2)
 Cl2 0.220(5) 0.072(2) 0.274(7) -0.002(3) 0.160(5) -0.016(3)
 C11 0.077(3) 0.075(3) 0.057(2) 0.026(2) 0.028(2) 0.030(2)
 C52 0.124(10) 0.102(8) 0.063(6) 0.041(6) -0.016(6) -0.054(7)

_geom_special_details
;
 All esds (except the esd in the dihedral angle between two l.s. planes)
 are estimated using the full covariance matrix.  The cell esds are taken
 into account individually in the estimation of esds in distances, angles
 and torsion angles; correlations between esds in cell parameters are only
 used when they are defined by crystal symmetry.  An approximate (isotropic)
 treatment of cell esds is used for estimating esds involving l.s. planes.
;
loop_
  _geom_bond_atom_site_label_1
  _geom_bond_atom_site_label_2
  _geom_bond_distance
  _geom_bond_site_symmetry_2
  _geom_bond_publ_flag
 Cu1 P2 2.2555(8) . ?
 Cu1 P1 2.2488(8) . ?
 Cu1 N1 2.053(2) . ?
 Cu1 N2 2.105(2) . ?
 P2 C34 1.826(3) . ?
 P2 C24 1.832(3) . ?
 P2 C28 1.833(3) . ?
 P1 C7 1.825(3) . ?
 P1 C13 1.825(3) . ?
 P1 C1 1.830(3) . ?
 P3 F1 1.605(2) . ?
 P3 F5 1.617(2) . ?
 P3 F3 1.5985(19) . ?
 P3 F6 1.598(2) . ?
 P3 F4 1.595(2) . ?
 P3 F2 1.577(2) . ?
 O1 C23 1.395(3) . ?
 O1 C18 1.389(3) . ?
 N1 C45 1.355(4) . ?
 N1 C41 1.343(4) . ?
 N2 C46 1.347(4) . ?
 N2 C51 1.332(4) . ?
 C45 C46 1.480(4) . ?
 C45 C44 1.392(4) . ?
 C34 C35 1.385(4) . ?
 C34 C39 1.393(4) . ?
 C24 C23 1.393(4) . ?
 C24 C25 1.396(4) . ?
 C23 C22 1.388(4) . ?
 C46 C47 1.387(4) . ?
 C25 H25 0.9500 . ?
 C25 C26 1.391(4) . ?
 C18 C17 1.383(4) . ?
 C18 C13 1.398(4) . ?
 C28 C33 1.388(4) . ?
 C28 C29 1.397(5) . ?
 C41 C42 1.394(4) . ?
 C41 C40 1.498(5) . ?
 C22 C27 1.396(4) . ?
 C22 C19 1.528(4) . ?
 C27 H27 0.9500 . ?
 C27 C26 1.389(4) . ?
 C44 H44 0.9500 . ?
 C44 C43 1.371(5) . ?
 C19 C17 1.531(4) . ?
 C19 C20 1.549(4) . ?
 C19 C21 1.526(4) . ?
 C26 H26 0.9500 . ?
 C14 H14 0.9500 . ?
 C14 C13 1.397(4) . ?
 C14 C15 1.389(5) . ?
 C17 C16 1.395(4) . ?
 C35 H35 0.9500 . ?
 C35 C36 1.384(5) . ?
 C7 C12 1.377(5) . ?
 C7 C8 1.401(5) . ?
 C51 H51 0.9500 . ?
 C51 C49 1.387(4) . ?
 C1 C6 1.397(4) . ?
 C1 C2 1.384(4) . ?
 C33 H33 0.9500 . ?
 C33 C32 1.387(5) . ?
 C15 H15 0.9500 . ?
 C15 C16 1.386(5) . ?
 C49 C50 1.514(5) . ?
 C49 C48 1.379(5) . ?
 C39 H39 0.9500 . ?
 C39 C38 1.393(5) . ?
 C43 H43 0.9500 . ?
 C43 C42 1.378(5) . ?
 C16 H16 0.9500 . ?
 C42 H42 0.9500 . ?
 C38 H38 0.9500 . ?
 C38 C37 1.381(5) . ?
 C20 H20A 0.9800 . ?
 C20 H20B 0.9800 . ?
 C20 H20C 0.9800 . ?
 C6 H6 0.9500 . ?
 C6 C5 1.387(5) . ?
 C40 H40A 0.9800 . ?
 C40 H40B 0.9800 . ?
 C40 H40C 0.9800 . ?
 C21 H21A 0.9800 . ?
 C21 H21B 0.9800 . ?
 C21 H21C 0.9800 . ?
 C37 H37 0.9500 . ?
 C37 C36 1.377(5) . ?
 C47 H47 0.9500 . ?
 C47 C48 1.382(5) . ?
 C2 H2 0.9500 . ?
 C2 C3 1.386(5) . ?
 C12 H12 0.9500 . ?
 C12 C11 1.395(5) . ?
 C8 H8 0.9500 . ?
 C8 C9 1.390(5) . ?
 C29 H29 0.9500 . ?
 C29 C30 1.378(5) . ?
 C5 H5 0.9500 . ?
 C5 C4 1.384(5) . ?
 C32 H32 0.9500 . ?
 C32 C31 1.361(6) . ?
 C4 H4 0.9500 . ?
 C4 C3 1.373(5) . ?
 C31 H31 0.9500 . ?
 C31 C30 1.386(6) . ?
 C36 H36 0.9500 . ?
 C3 H3 0.9500 . ?
 C50 H50A 0.9800 . ?
 C50 H50B 0.9800 . ?
 C50 H50C 0.9800 . ?
 Cl1 C52 1.765(11) . ?
 C48 H48 0.9500 . ?
 C10 H10 0.9500 . ?
 C10 C9 1.379(7) . ?
 C10 C11 1.377(7) . ?
 C9 H9 0.9500 . ?
 C30 H30 0.9500 . ?
 Cl2 C52 1.739(13) . ?
 C11 H11 0.9500 . ?
 C52 H52A 0.9900 . ?
 C52 H52B 0.9900 . ?

loop_
  _geom_angle_atom_site_label_1
  _geom_angle_atom_site_label_2
  _geom_angle_atom_site_label_3
  _geom_angle
  _geom_angle_site_symmetry_1
  _geom_angle_site_symmetry_3
  _geom_angle_publ_flag
 P1 Cu1 P2 117.36(3) . . ?
 N1 Cu1 P2 120.61(7) . . ?
 N1 Cu1 P1 116.05(7) . . ?
 N1 Cu1 N2 80.02(9) . . ?
 N2 Cu1 P2 103.55(7) . . ?
 N2 Cu1 P1 110.47(7) . . ?
 C34 P2 Cu1 119.68(9) . . ?
 C34 P2 C24 103.93(13) . . ?
 C34 P2 C28 103.77(13) . . ?
 C24 P2 Cu1 108.27(9) . . ?
 C24 P2 C28 102.17(13) . . ?
 C28 P2 Cu1 116.95(9) . . ?
 C7 P1 Cu1 120.74(11) . . ?
 C7 P1 C13 102.53(15) . . ?
 C7 P1 C1 105.82(13) . . ?
 C13 P1 Cu1 108.24(9) . . ?
 C13 P1 C1 101.79(14) . . ?
 C1 P1 Cu1 115.37(10) . . ?
 F1 P3 F5 88.65(11) . . ?
 F3 P3 F1 89.88(11) . . ?
 F3 P3 F5 88.64(11) . . ?
 F6 P3 F1 177.72(13) . . ?
 F6 P3 F5 89.10(12) . . ?
 F6 P3 F3 90.37(12) . . ?
 F4 P3 F1 89.91(12) . . ?
 F4 P3 F5 89.44(13) . . ?
 F4 P3 F3 178.07(14) . . ?
 F4 P3 F6 89.77(13) . . ?
 F2 P3 F1 89.81(14) . . ?
 F2 P3 F5 178.45(14) . . ?
 F2 P3 F3 91.30(13) . . ?
 F2 P3 F6 92.45(15) . . ?
 F2 P3 F4 90.61(15) . . ?
 C18 O1 C23 113.8(2) . . ?
 C45 N1 Cu1 113.91(19) . . ?
 C41 N1 Cu1 126.7(2) . . ?
 C41 N1 C45 119.2(2) . . ?
 C46 N2 Cu1 112.48(19) . . ?
 C51 N2 Cu1 127.85(19) . . ?
 C51 N2 C46 118.2(3) . . ?
 N1 C45 C46 116.5(2) . . ?
 N1 C45 C44 121.4(3) . . ?
 C44 C45 C46 122.1(3) . . ?
 C35 C34 P2 122.7(2) . . ?
 C35 C34 C39 118.8(3) . . ?
 C39 C34 P2 118.5(2) . . ?
 C23 C24 P2 118.8(2) . . ?
 C23 C24 C25 117.5(3) . . ?
 C25 C24 P2 123.5(2) . . ?
 C24 C23 O1 116.8(2) . . ?
 C22 C23 O1 119.4(2) . . ?
 C22 C23 C24 123.8(3) . . ?
 N2 C46 C45 115.5(3) . . ?
 N2 C46 C47 121.2(3) . . ?
 C47 C46 C45 123.3(3) . . ?
 C24 C25 H25 119.9 . . ?
 C26 C25 C24 120.2(3) . . ?
 C26 C25 H25 119.9 . . ?
 O1 C18 C13 116.5(3) . . ?
 C17 C18 O1 120.1(2) . . ?
 C17 C18 C13 123.4(3) . . ?
 C33 C28 P2 123.8(2) . . ?
 C33 C28 C29 118.5(3) . . ?
 C29 C28 P2 117.7(2) . . ?
 N1 C41 C42 121.3(3) . . ?
 N1 C41 C40 117.5(3) . . ?
 C42 C41 C40 121.2(3) . . ?
 C23 C22 C27 117.2(3) . . ?
 C23 C22 C19 118.0(2) . . ?
 C27 C22 C19 124.9(3) . . ?
 C22 C27 H27 119.7 . . ?
 C26 C27 C22 120.7(3) . . ?
 C26 C27 H27 119.7 . . ?
 C45 C44 H44 120.4 . . ?
 C43 C44 C45 119.2(3) . . ?
 C43 C44 H44 120.4 . . ?
 C22 C19 C17 106.5(2) . . ?
 C22 C19 C20 108.7(2) . . ?
 C17 C19 C20 108.2(2) . . ?
 C21 C19 C22 112.0(2) . . ?
 C21 C19 C17 111.6(3) . . ?
 C21 C19 C20 109.7(2) . . ?
 C25 C26 H26 119.7 . . ?
 C27 C26 C25 120.7(3) . . ?
 C27 C26 H26 119.7 . . ?
 C13 C14 H14 119.7 . . ?
 C15 C14 H14 119.7 . . ?
 C15 C14 C13 120.6(3) . . ?
 C18 C17 C19 117.6(3) . . ?
 C18 C17 C16 117.8(3) . . ?
 C16 C17 C19 124.6(3) . . ?
 C34 C35 H35 119.6 . . ?
 C36 C35 C34 120.7(3) . . ?
 C36 C35 H35 119.6 . . ?
 C12 C7 P1 118.8(3) . . ?
 C12 C7 C8 119.4(3) . . ?
 C8 C7 P1 121.8(3) . . ?
 N2 C51 H51 117.8 . . ?
 N2 C51 C49 124.4(3) . . ?
 C49 C51 H51 117.8 . . ?
 C18 C13 P1 117.5(2) . . ?
 C14 C13 P1 125.2(2) . . ?
 C14 C13 C18 117.1(3) . . ?
 C6 C1 P1 123.6(2) . . ?
 C2 C1 P1 117.3(2) . . ?
 C2 C1 C6 119.0(3) . . ?
 C28 C33 H33 120.0 . . ?
 C32 C33 C28 119.9(3) . . ?
 C32 C33 H33 120.0 . . ?
 C14 C15 H15 119.7 . . ?
 C16 C15 C14 120.6(3) . . ?
 C16 C15 H15 119.7 . . ?
 C51 C49 C50 120.9(3) . . ?
 C48 C49 C51 116.7(3) . . ?
 C48 C49 C50 122.4(3) . . ?
 C34 C39 H39 119.8 . . ?
 C38 C39 C34 120.5(3) . . ?
 C38 C39 H39 119.8 . . ?
 C44 C43 H43 120.3 . . ?
 C44 C43 C42 119.5(3) . . ?
 C42 C43 H43 120.3 . . ?
 C17 C16 H16 119.8 . . ?
 C15 C16 C17 120.4(3) . . ?
 C15 C16 H16 119.8 . . ?
 C41 C42 H42 120.3 . . ?
 C43 C42 C41 119.4(3) . . ?
 C43 C42 H42 120.3 . . ?
 C39 C38 H38 120.1 . . ?
 C37 C38 C39 119.7(3) . . ?
 C37 C38 H38 120.1 . . ?
 C19 C20 H20A 109.5 . . ?
 C19 C20 H20B 109.5 . . ?
 C19 C20 H20C 109.5 . . ?
 H20A C20 H20B 109.5 . . ?
 H20A C20 H20C 109.5 . . ?
 H20B C20 H20C 109.5 . . ?
 C1 C6 H6 120.0 . . ?
 C5 C6 C1 120.0(3) . . ?
 C5 C6 H6 120.0 . . ?
 C41 C40 H40A 109.5 . . ?
 C41 C40 H40B 109.5 . . ?
 C41 C40 H40C 109.5 . . ?
 H40A C40 H40B 109.5 . . ?
 H40A C40 H40C 109.5 . . ?
 H40B C40 H40C 109.5 . . ?
 C19 C21 H21A 109.5 . . ?
 C19 C21 H21B 109.5 . . ?
 C19 C21 H21C 109.5 . . ?
 H21A C21 H21B 109.5 . . ?
 H21A C21 H21C 109.5 . . ?
 H21B C21 H21C 109.5 . . ?
 C38 C37 H37 119.9 . . ?
 C36 C37 C38 120.2(3) . . ?
 C36 C37 H37 119.9 . . ?
 C46 C47 H47 120.3 . . ?
 C48 C47 C46 119.3(3) . . ?
 C48 C47 H47 120.3 . . ?
 C1 C2 H2 119.7 . . ?
 C1 C2 C3 120.7(3) . . ?
 C3 C2 H2 119.7 . . ?
 C7 C12 H12 119.8 . . ?
 C7 C12 C11 120.3(4) . . ?
 C11 C12 H12 119.8 . . ?
 C7 C8 H8 120.1 . . ?
 C9 C8 C7 119.9(4) . . ?
 C9 C8 H8 120.1 . . ?
 C28 C29 H29 119.7 . . ?
 C30 C29 C28 120.6(4) . . ?
 C30 C29 H29 119.7 . . ?
 C6 C5 H5 119.9 . . ?
 C4 C5 C6 120.2(3) . . ?
 C4 C5 H5 119.9 . . ?
 C33 C32 H32 119.3 . . ?
 C31 C32 C33 121.4(4) . . ?
 C31 C32 H32 119.3 . . ?
 C5 C4 H4 120.0 . . ?
 C3 C4 C5 120.0(3) . . ?
 C3 C4 H4 120.0 . . ?
 C32 C31 H31 120.4 . . ?
 C32 C31 C30 119.3(3) . . ?
 C30 C31 H31 120.4 . . ?
 C35 C36 H36 119.9 . . ?
 C37 C36 C35 120.1(3) . . ?
 C37 C36 H36 119.9 . . ?
 C2 C3 H3 119.9 . . ?
 C4 C3 C2 120.1(3) . . ?
 C4 C3 H3 119.9 . . ?
 C49 C50 H50A 109.5 . . ?
 C49 C50 H50B 109.5 . . ?
 C49 C50 H50C 109.5 . . ?
 H50A C50 H50B 109.5 . . ?
 H50A C50 H50C 109.5 . . ?
 H50B C50 H50C 109.5 . . ?
 C49 C48 C47 120.1(3) . . ?
 C49 C48 H48 120.0 . . ?
 C47 C48 H48 120.0 . . ?
 C9 C10 H10 120.0 . . ?
 C11 C10 H10 120.0 . . ?
 C11 C10 C9 120.1(4) . . ?
 C8 C9 H9 119.9 . . ?
 C10 C9 C8 120.2(4) . . ?
 C10 C9 H9 119.9 . . ?
 C29 C30 C31 120.3(4) . . ?
 C29 C30 H30 119.8 . . ?
 C31 C30 H30 119.8 . . ?
 C12 C11 H11 119.9 . . ?
 C10 C11 C12 120.1(4) . . ?
 C10 C11 H11 119.9 . . ?
 Cl1 C52 H52A 109.9 . . ?
 Cl1 C52 H52B 109.9 . . ?
 Cl2 C52 Cl1 109.1(8) . . ?
 Cl2 C52 H52A 109.9 . . ?
 Cl2 C52 H52B 109.9 . . ?
 H52A C52 H52B 108.3 . . ?

_smtbx_masks_special_details
;
A solvent mask was calculated and 121.0 electrons were 

found in a volume of 689.0\%A^3 in 1 void. 

This is consistent with the presence of 


3/4C4H10O1
 per formula unit 

which account for 164.0 electrons.
;
loop_
  _smtbx_masks_void_nr
  _smtbx_masks_void_average_x
  _smtbx_masks_void_average_y
  _smtbx_masks_void_average_z
  _smtbx_masks_void_volume
  _smtbx_masks_void_count_electrons
  _smtbx_masks_void_content
 1 -0.305 -0.052 -0.305 688.6 120.6
;

3/4 C4H10O1

;

_shelx_res_file
;
    brf214_130k_0m.res created by SHELXL-2014/7

TITL brf214_130k_0m_a.res in P2(1)/n
REM Old TITL brf214_130k_0m_a.res in P2(1)/n
REM SHELXT solution in P2(1)/n
REM R1 0.126, Rweak 0.005, Alpha 0.040, Orientation as input
REM Formula found by SHELXT: C58 Cl2 Cu F7 N O P
CELL 1.54178 17.6502 16.8504 18.4582 90 104.685 90
ZERR 4 0.0015 0.0015 0.0016 0 0.003 0
LATT 1
SYMM 0.5-X,0.5+Y,0.5-Z
SFAC C Cl Cu F H N O P
UNIT 218 4 4 24 210 8 7 12
ISOR Cl2 C52 Cl1

L.S. 10
PLAN  5
SIZE 0.15 0.25 0.26
TEMP -143.15
BOND $H
LIST 6
ABIN
fmap 2
acta
REM <olex2.extras>
REM <HklSrc "%./BRF214_130K_0m.hkl">
REM </olex2.extras>

WGHT    0.114400    7.009300
FVAR       0.28231
CU1   3    0.312353    0.414369    0.615697    11.00000    0.02242    0.03451 =
         0.02575   -0.00142    0.00399    0.00124
P2    8    0.190675    0.461563    0.566020    11.00000    0.02227    0.03066 =
         0.02856   -0.00412    0.00367    0.00195
P1    8    0.369217    0.344869    0.539753    11.00000    0.02301    0.03956 =
         0.02649    0.00035    0.00663    0.00356
P3    8    0.188931    0.861193    0.440663    11.00000    0.04221    0.03384 =
         0.03514    0.00298    0.00862    0.01010
O1    7    0.204281    0.307547    0.496768    11.00000    0.02639    0.03174 =
         0.02952   -0.00222    0.00810    0.00045
F1    4    0.118663    0.824026    0.376915    11.00000    0.06175    0.04525 =
         0.04073   -0.00243    0.00266    0.00113
F5    4    0.125187    0.889390    0.484700    11.00000    0.04668    0.05747 =
         0.03869    0.00448    0.01394    0.00334
F3    4    0.177307    0.944244    0.397401    11.00000    0.05266    0.04010 =
         0.05090    0.01154    0.01846    0.00510
F6    4    0.256477    0.898869    0.506093    11.00000    0.04336    0.05855 =
         0.06400   -0.00274   -0.00741    0.00575
F4    4    0.198225    0.779133    0.485103    11.00000    0.10726    0.03743 =
         0.04730    0.00855    0.00056    0.01392
N1    6    0.386961    0.471737    0.703503    11.00000    0.02289    0.03410 =
         0.02996   -0.00390    0.00354    0.00259
F2    4    0.249212    0.832788    0.395992    11.00000    0.06329    0.08699 =
         0.07309   -0.00217    0.03044    0.03412
N2    6    0.298798    0.343082    0.705239    11.00000    0.02813    0.03368 =
         0.02788    0.00029    0.00480    0.00230
C45   1    0.385996    0.442495    0.771656    11.00000    0.02354    0.03553 =
         0.03024   -0.00419    0.00282    0.00610
C34   1    0.167057    0.506430    0.472925    11.00000    0.02492    0.03423 =
         0.03432   -0.00032    0.00795    0.00659
C24   1    0.121453    0.378956    0.556953    11.00000    0.02337    0.03369 =
         0.02768   -0.00050    0.00274    0.00084
C23   1    0.137944    0.308306    0.524800    11.00000    0.02325    0.03734 =
         0.02473   -0.00050    0.00404    0.00196
C46   1    0.331849    0.375626    0.772499    11.00000    0.02720    0.03731 =
         0.02922   -0.00011    0.00473    0.00601
C25   1    0.056042    0.380156    0.586471    11.00000    0.02914    0.03842 =
         0.03693   -0.00221    0.00911    0.00479
AFIX  43
H25   5    0.042504    0.427485    0.608197    11.00000   -1.20000
AFIX   0
C18   1    0.246845    0.237417    0.510797    11.00000    0.03254    0.03403 =
         0.02437   -0.00287    0.00775    0.00418
C28   1    0.151858    0.532538    0.622731    11.00000    0.02461    0.03854 =
         0.03739   -0.01160    0.00409    0.00116
C41   1    0.437617    0.529879    0.698956    11.00000    0.02814    0.03694 =
         0.04016   -0.00367    0.00797    0.00133
C22   1    0.093594    0.239715    0.521143    11.00000    0.02836    0.03621 =
         0.02774   -0.00150    0.00330   -0.00080
C27   1    0.029093    0.242832    0.551924    11.00000    0.02979    0.03893 =
         0.04019    0.00043    0.00882   -0.00442
AFIX  43
H27   5   -0.002489    0.196970    0.550796    11.00000   -1.20000
AFIX   0
C44   1    0.434891    0.472918    0.837113    11.00000    0.03447    0.04083 =
         0.03156   -0.00508   -0.00036    0.00767
AFIX  43
H44   5    0.432509    0.452779    0.884557    11.00000   -1.20000
AFIX   0
C19   1    0.118694    0.166621    0.484046    11.00000    0.03679    0.03328 =
         0.03028   -0.00422    0.00689   -0.00320
C26   1    0.010635    0.312311    0.584180    11.00000    0.02831    0.04697 =
         0.04327   -0.00061    0.01396   -0.00034
AFIX  43
H26   5   -0.033448    0.313491    0.604880    11.00000   -1.20000
AFIX   0
C14   1    0.372025    0.174772    0.545432    11.00000    0.03415    0.04605 =
         0.03980   -0.00323    0.00982    0.00851
AFIX  43
H14   5    0.427605    0.177159    0.557852    11.00000   -1.20000
AFIX   0
C17   1    0.208345    0.165435    0.506998    11.00000    0.03882    0.03701 =
         0.02630   -0.00597    0.00933    0.00176
C35   1    0.114770    0.472559    0.411926    11.00000    0.04001    0.04412 =
         0.03439   -0.00069    0.00403   -0.00177
AFIX  43
H35   5    0.089949    0.423822    0.417841    11.00000   -1.20000
AFIX   0
C7    1    0.357288    0.374758    0.442486    11.00000    0.02366    0.05939 =
         0.03120    0.00682    0.00857    0.00658
C51   1    0.250779    0.281603    0.702646    11.00000    0.03409    0.03884 =
         0.03136    0.00207    0.00224   -0.00222
AFIX  43
H51   5    0.228828    0.257970    0.655239    11.00000   -1.20000
AFIX   0
C13   1    0.328412    0.244759    0.530330    11.00000    0.03185    0.03984 =
         0.02787   -0.00358    0.00992    0.00391
C1    1    0.473820    0.325164    0.576894    11.00000    0.02532    0.04339 =
         0.03577    0.00024    0.00706    0.00456
C33   1    0.101969    0.594615    0.592879    11.00000    0.03179    0.04040 =
         0.05109   -0.01016    0.00756    0.00377
AFIX  43
H33   5    0.087219    0.603062    0.540280    11.00000   -1.20000
AFIX   0
C15   1    0.334865    0.101735    0.542451    11.00000    0.04787    0.04022 =
         0.04637   -0.00137    0.01134    0.01357
AFIX  43
H15   5    0.365261    0.054694    0.553593    11.00000   -1.20000
AFIX   0
C49   1    0.230661    0.249759    0.764509    11.00000    0.04051    0.04775 =
         0.03880    0.00626    0.00733   -0.00385
C39   1    0.203108    0.577707    0.463048    11.00000    0.03196    0.03889 =
         0.04682    0.00093    0.00833    0.00079
AFIX  43
H39   5    0.239849    0.601167    0.504130    11.00000   -1.20000
AFIX   0
C43   1    0.486526    0.532293    0.832293    11.00000    0.03323    0.04208 =
         0.04096   -0.01117   -0.00411    0.00104
AFIX  43
H43   5    0.520652    0.553323    0.876398    11.00000   -1.20000
AFIX   0
C16   1    0.253802    0.096887    0.523358    11.00000    0.04934    0.03392 =
         0.04028   -0.00371    0.01321    0.00316
AFIX  43
H16   5    0.229064    0.046581    0.521403    11.00000   -1.20000
AFIX   0
C42   1    0.488521    0.561217    0.762954    11.00000    0.02956    0.03764 =
         0.04944   -0.00845    0.00598   -0.00270
AFIX  43
H42   5    0.524238    0.602110    0.758814    11.00000   -1.20000
AFIX   0
C38   1    0.185682    0.614834    0.393378    11.00000    0.04292    0.04227 =
         0.05548    0.01034    0.02146    0.00816
AFIX  43
H38   5    0.209256    0.664236    0.387278    11.00000   -1.20000
AFIX   0
C20   1    0.091709    0.176925    0.397956    11.00000    0.04557    0.03961 =
         0.03139   -0.00640    0.00507   -0.00465
AFIX 137
H20A  5    0.034396    0.179433    0.382302    11.00000   -1.50000
H20B  5    0.109980    0.131744    0.373539    11.00000   -1.50000
H20C  5    0.113676    0.226117    0.383549    11.00000   -1.50000
AFIX   0
C6    1    0.524958    0.310014    0.531857    11.00000    0.03029    0.06607 =
         0.03795    0.00633    0.01269    0.00732
AFIX  43
H6    5    0.506763    0.313495    0.478912    11.00000   -1.20000
AFIX   0
C40   1    0.437591    0.559550    0.622438    11.00000    0.04580    0.04771 =
         0.04482   -0.00007    0.01045   -0.01199
AFIX 137
H40A  5    0.457721    0.518044    0.595123    11.00000   -1.50000
H40B  5    0.471019    0.606668    0.626985    11.00000   -1.50000
H40C  5    0.384018    0.573348    0.595151    11.00000   -1.50000
AFIX   0
C21   1    0.084360    0.090293    0.506912    11.00000    0.04619    0.03488 =
         0.04382   -0.00375    0.01157   -0.00572
AFIX 137
H21A  5    0.103396    0.082828    0.561149    11.00000   -1.50000
H21B  5    0.100563    0.045138    0.480924    11.00000   -1.50000
H21C  5    0.027073    0.093903    0.493345    11.00000   -1.50000
AFIX   0
C37   1    0.133980    0.579517    0.333197    11.00000    0.05346    0.05549 =
         0.04005    0.01137    0.01975    0.01744
AFIX  43
H37   5    0.123015    0.603983    0.285293    11.00000   -1.20000
AFIX   0
C47   1    0.314859    0.347644    0.837266    11.00000    0.04778    0.05969 =
         0.02765   -0.00149    0.00578   -0.00594
AFIX  43
H47   5    0.338369    0.371344    0.884292    11.00000   -1.20000
AFIX   0
C2    1    0.501748    0.320267    0.653898    11.00000    0.03211    0.07082 =
         0.03556   -0.00568    0.00720    0.01578
AFIX  43
H2    5    0.467515    0.330719    0.685036    11.00000   -1.20000
AFIX   0
C12   1    0.350931    0.454323    0.424950    11.00000    0.05798    0.06109 =
         0.04277    0.00995    0.02201    0.01911
AFIX  43
H12   5    0.354407    0.492512    0.463518    11.00000   -1.20000
AFIX   0
C8    1    0.353028    0.319004    0.385312    11.00000    0.05384    0.06497 =
         0.03787   -0.00307    0.01489   -0.00538
AFIX  43
H8    5    0.358233    0.264021    0.396888    11.00000   -1.20000
AFIX   0
C29   1    0.172790    0.522213    0.700370    11.00000    0.04804    0.07366 =
         0.03907   -0.01267    0.00362    0.02233
AFIX  43
H29   5    0.207616    0.480642    0.721888    11.00000   -1.20000
AFIX   0
C5    1    0.602298    0.289890    0.564433    11.00000    0.03068    0.08028 =
         0.05163    0.00360    0.01637    0.01243
AFIX  43
H5    5    0.637016    0.279641    0.533733    11.00000   -1.20000
AFIX   0
C32   1    0.073677    0.644300    0.639924    11.00000    0.04243    0.04517 =
         0.07386   -0.01835    0.01271    0.00770
AFIX  43
H32   5    0.039179    0.686313    0.618926    11.00000   -1.20000
AFIX   0
C4    1    0.629039    0.284696    0.641562    11.00000    0.02884    0.07953 =
         0.04937   -0.00280    0.00429    0.01385
AFIX  43
H4    5    0.681899    0.270358    0.663698    11.00000   -1.20000
AFIX   0
C31   1    0.094312    0.634113    0.715543    11.00000    0.04937    0.06769 =
         0.06763   -0.03504    0.01617    0.00526
AFIX  43
H31   5    0.075310    0.669316    0.747092    11.00000   -1.20000
AFIX   0
C36   1    0.098281    0.508919    0.342461    11.00000    0.05365    0.05786 =
         0.03509   -0.00086    0.00436    0.00456
AFIX  43
H36   5    0.062252    0.485121    0.301073    11.00000   -1.20000
AFIX   0
C3    1    0.579153    0.300271    0.686076    11.00000    0.03991    0.08751 =
         0.03793   -0.00693    0.00117    0.02000
AFIX  43
H3    5    0.597729    0.297335    0.739019    11.00000   -1.20000
AFIX   0
C50   1    0.174092    0.180780    0.756163    11.00000    0.06361    0.06355 =
         0.05262    0.00969    0.01159   -0.02358
AFIX 137
H50A  5    0.121584    0.200780    0.754680    11.00000   -1.50000
H50B  5    0.191243    0.144672    0.798799    11.00000   -1.50000
H50C  5    0.172845    0.152252    0.709608    11.00000   -1.50000
AFIX   0

CL1   2    0.089290    0.419248    0.812881    10.50000    0.10785    0.10698 =
         0.15170    0.02914    0.03214   -0.00553
C48   1    0.263392    0.284944    0.832727    11.00000    0.05357    0.07103 =
         0.03476    0.00896    0.01218   -0.01344
AFIX  43
H48   5    0.250549    0.266065    0.876633    11.00000   -1.20000
AFIX   0
C10   1    0.334010    0.424094    0.294672    11.00000    0.05251    0.12068 =
         0.03360    0.01875    0.01494    0.02452
AFIX  43
H10   5    0.325336    0.441108    0.244162    11.00000   -1.20000
AFIX   0
C9    1    0.341168    0.344286    0.311593    11.00000    0.06171    0.09355 =
         0.03688   -0.00508    0.01403   -0.00172
AFIX  43
H9    5    0.337985    0.306477    0.272756    11.00000   -1.20000
AFIX   0
C30   1    0.143374    0.571786    0.746013    11.00000    0.05950    0.10640 =
         0.04286   -0.02872    0.00666    0.02114
AFIX  43
H30   5    0.156772    0.563215    0.798598    11.00000   -1.20000
AFIX   0

CL2   2    0.013067    0.274485    0.832981    10.50000    0.21991    0.07170 =
         0.27449   -0.00213    0.15978   -0.01636
C11   1    0.339416    0.479134    0.350861    11.00000    0.07674    0.07498 =
         0.05654    0.02628    0.02842    0.02989
AFIX  43
H11   5    0.335295    0.534121    0.339155    11.00000   -1.20000
AFIX   0

PART 1
C52   1    0.045109    0.365651    0.873443    10.50000    0.12357    0.10198 =
         0.06306    0.04140   -0.01562   -0.05434
AFIX  23
H52A  5    0.083394    0.357393    0.922292    10.50000   -1.20000
H52B  5    0.000216    0.395984    0.882198    10.50000   -1.20000
AFIX   0
HKLF 4

REM  brf214_130k_0m_a.res in P2(1)/n
REM R1 =  0.0544 for    8839 Fo > 4sig(Fo)  and  0.0575 for all    9603 data
REM    608 parameters refined using     18 restraints

END

WGHT      0.1144      7.0092

REM Highest difference peak  1.864,  deepest hole -0.736,  1-sigma level  0.094
Q1    1  -0.0196  0.4260  0.8714  11.00000  0.05    1.86
Q2    1   0.1061  0.3746  0.8774  11.00000  0.05    1.77
Q3    1   0.0451  0.3311  0.8429  11.00000  0.05    1.07
Q4    1   0.1678  0.8239  0.3693  11.00000  0.05    0.48
Q5    1   0.2828  0.8770  0.4149  11.00000  0.05    0.44
;
_shelx_res_checksum                18135
_shelx_hkl_file
;
  -1   0   0   -5.80    0.30
  -2   0   0 4666.13  230.28
  -3   0   0   -2.30    0.60
   3   0   0   -2.40    0.20
  -3   0   0   -3.10    0.80
   3   0   0   -2.20    0.20
  -3   0   0   -2.60    0.70
  -4   0   0 4680.33  171.28
   4   0   0 4809.82  169.08
  -4   0   0 4594.54  178.18
  -4   0   0 4347.06  229.08
  -4   0   0 4583.04  166.98
  -4   0   0 4590.64  155.58
  -4   0   0 4717.43  174.28
  -4   0   0 4794.32  163.98
  -5   0   0   -1.40    0.90
   5   0   0   -0.50    0.30
  -5   0   0    0.50    0.70
  -5   0   0   -0.80    0.90
  -5   0   0   -0.10    0.80
  -5   0   0   -0.40    1.20
  -5   0   0    0.80    1.00
  -5   0   0   -0.70    0.40
  -6   0   0 1707.93   60.29
  -6   0   0 1657.03   56.89
  -6   0   0 1556.44   83.89
   6   0   0 1707.33   61.39
  -6   0   0 1691.13   65.29
  -6   0   0 1705.93   62.79
  -6   0   0 1638.74   60.59
   6   0   0 1714.03   66.09
  -6   0   0 1714.23   64.29
  -7   0   0   -0.20    1.30
  -7   0   0   -0.40    1.10
  -7   0   0   -0.70    0.80
   7   0   0    0.40    0.60
  -7   0   0   -1.50    1.10
  -7   0   0    0.20    1.50
  -7   0   0    0.00    0.40
   7   0   0    3.90    0.60
   8   0   0    3.50    0.90
   8   0   0    3.40    0.80
  -8   0   0    2.10    1.90
  -8   0   0    4.10    1.70
  -8   0   0    4.10    2.00
  -8   0   0    4.40    1.60
  -8   0   0    4.30    1.50
  -9   0   0   -0.10    1.30
  -9   0   0    0.00    1.30
  -9   0   0    2.40    1.80
  -9   0   0    0.10    1.60
   9   0   0   -0.20    0.50
   9   0   0    1.60    0.80
 -10   0   0  687.73   35.90
  10   0   0  721.23   25.40
 -10   0   0  646.64   23.60
  10   0   0  622.04   27.30
 -10   0   0  671.73   26.10
 -10   0   0  674.03   27.90
 -11   0   0    0.60    1.70
  11   0   0    0.50    0.70
 -11   0   0    0.10    1.30
 -11   0   0    0.00    1.40
  11   0   0    1.10    0.90
  11   0   0    0.20    0.40
  11   0   0   -0.50    0.40
  12   0   0   12.30    1.20
 -12   0   0   13.70    2.60
  12   0   0   13.00    1.80
 -13   0   0   -1.10    0.50
  13   0   0    0.50    1.00
 -14   0   0  401.46   13.10
 -14   0   0  398.56   13.30
 -15   0   0   -0.30    0.60
 -15   0   0    0.50    0.60
 -16   0   0 1036.30   31.90
 -16   0   0  949.01   32.20
 -17   0   0    0.10    0.60
 -17   0   0    0.90    0.60
 -18   0   0  257.77    8.50
 -18   0   0  244.08    8.30
 -19   0   0   -0.40    0.50
 -19   0   0    0.50    0.50
 -20   0   0    0.00    0.40
   0  -1   0   -0.30    0.10
   0   1   0   -0.20    0.10
   0   1   0   -0.20    0.10
  -1  -1   0  263.37   13.00
  -2  -1   0 2557.44  127.49
  -2  -1   0 2520.85  129.49
   2   1   0 2681.43   91.59
   2   1   0 2730.43  127.59
  -2   1   0 2463.85  129.39
   2   1   0 2757.52   91.59
  -3  -1   0  293.37   15.60
  -3   1   0  297.17   15.50
  -3   1   0  293.87   12.10
  -3   1   0  299.97   10.60
   3   1   0  311.17   15.00
  -3   1   0  292.67   12.20
   3   1   0  318.07   11.30
  -3   1   0  298.07   11.30
   3   1   0  298.97   12.10
  -4  -1   0 8029.80  299.57
  -4  -1   0 7580.24  394.06
  -4  -1   0 7775.32  281.87
  -4  -1   0 8113.49  306.57
  -4   1   0 8205.88  299.57
  -4   1   0 7990.80  267.87
  -4   1   0 7665.33  394.06
  -4   1   0 8023.30  294.57
   4   1   0 8218.38  388.86
  -4   1   0 7722.43  306.57
   4   1   0 8372.96  313.77
  -4   1   0 8126.89  281.97
   4   1   0 8088.89  291.47
  -5  -1   0  523.45   20.30
  -5  -1   0  556.54   20.40
  -5  -1   0  506.25   22.70
  -5  -1   0  537.55   19.00
  -5  -1   0  553.94   22.00
  -5  -1   0  577.84   22.10
  -5  -1   0  524.05   28.40
  -5   1   0  564.24   21.20
  -5   1   0  567.64   19.30
  -5   1   0  534.45   28.40
   5   1   0  560.94   27.40
  -5   1   0  563.34   22.00
   5   1   0  573.74   22.10
  -5   1   0  551.34   22.10
   5   1   0  574.54   20.60
  -5   1   0  571.04   20.60
  -6  -1   0   96.29    4.00
  -6  -1   0   99.29    5.40
   6  -1   0   95.39    3.70
  -6  -1   0  112.79    4.80
   6  -1   0   99.59    3.80
  -6  -1   0   97.49    4.80
  -6  -1   0   93.89    3.90
  -6  -1   0   88.19    6.20
  -6  -1   0   92.39    4.80
  -6   1   0   85.79    6.10
   6   1   0   94.89    4.40
   6   1   0   98.09    4.10
  -6   1   0   98.29    4.20
  -6   1   0   94.69    4.90
  -6   1   0   96.49    4.70
  -6   1   0   95.29    5.20
  -6   1   0  101.29    4.80
  -7  -1   0  239.98   13.70
  -7  -1   0  250.37   10.50
   7  -1   0  227.28    9.00
  -7  -1   0  235.68    9.10
  -7  -1   0  242.78    9.90
  -7   1   0  229.08   13.50
  -7   1   0  232.48   10.90
  -7   1   0  244.48   10.70
  -7   1   0  241.78    9.20
   7   1   0  242.98   10.10
  -7   1   0  244.88   10.10
  -7   1   0  249.18   10.20
   7   1   0  231.78    9.30
  -8  -1   0  349.37   19.50
  -8  -1   0  344.07   13.20
  -8  -1   0  361.36   15.10
   8  -1   0  358.26   13.30
  -8  -1   0  344.37   14.20
  -8   1   0  344.87   19.40
   8   1   0  365.06   14.70
  -8   1   0  345.97   15.50
  -8   1   0  356.76   14.30
  -8   1   0  356.76   14.70
  -8   1   0  345.87   13.10
   8   1   0  352.26   13.60
  -8   1   0  338.97   15.20
  -9  -1   0   41.20    4.50
  -9  -1   0   36.20    3.30
   9  -1   0   36.30    2.00
  -9  -1   0   36.00    1.80
   9  -1   0   35.10    2.20
  -9  -1   0   38.40    3.20
  -9   1   0   35.70    4.30
   9   1   0   37.20    1.70
   9   1   0   39.00    1.80
  -9   1   0   37.60    2.80
   9   1   0   34.30    2.30
  -9   1   0   37.70    3.30
   9   1   0   36.40    2.50
  -9   1   0   36.00    3.80
  -9   1   0   34.40    3.30
 -10  -1   0  192.68   12.30
 -10  -1   0  186.98    9.30
  10  -1   0  180.98    8.30
 -10  -1   0  187.88    7.10
  10  -1   0  194.88    7.70
  10   1   0  188.38    7.10
 -10   1   0  197.08   12.20
 -10   1   0  179.68    9.50
  10   1   0  192.88    8.00
  10   1   0  176.68    8.60
  10   1   0  191.58    7.20
 -10   1   0  201.28   10.30
 -10   1   0  188.38    9.10
 -11  -1   0   87.09    7.50
  11  -1   0   77.69    4.30
  11  -1   0   83.79    4.00
 -11  -1   0   80.09    3.40
  11   1   0   83.09    4.70
  11   1   0   77.49    3.50
 -11   1   0   86.29    7.20
 -11   1   0   77.19    5.20
 -11   1   0   81.39    6.20
 -11   1   0   69.99    5.30
  12  -1   0   25.00    2.20
  12  -1   0   21.10    2.20
  12  -1   0   24.80    1.40
 -12  -1   0   25.10    1.60
  12  -1   0   22.90    1.40
  12   1   0   25.80    1.80
  12   1   0   21.70    2.40
 -12   1   0   25.60    3.10
 -12   1   0   25.30    3.60
 -13  -1   0  105.29    3.80
  13  -1   0   95.49    5.50
 -13   1   0  110.89    6.80
  13   1   0   98.29    5.90
 -13   1   0  103.99    3.80
 -14  -1   0  187.28    6.40
 -14  -1   0  183.88    6.50
 -14   1   0  190.78    6.40
 -14   1   0  189.18    6.50
 -15  -1   0   64.19    2.50
 -15  -1   0   60.89    2.60
 -15   1   0   59.99    2.60
 -15   1   0   62.99    2.50
 -16  -1   0    1.00    0.60
 -16  -1   0    0.70    0.60
 -16   1   0    0.90    0.60
 -16   1   0    0.80    0.60
 -17  -1   0   51.39    2.30
 -17  -1   0   54.99    2.20
 -17   1   0   51.19    2.30
 -17   1   0   51.99    2.20
 -18  -1   0   46.70    2.10
 -18  -1   0   48.10    2.00
 -18   1   0   45.80    2.00
 -18   1   0   50.89    2.10
 -19  -1   0   38.60    1.60
 -19   1   0   35.40    1.70
 -19   1   0   35.90    1.60
 -20  -1   0   36.60    1.50
 -20   1   0   33.30    1.50
   0  -2   0  191.08    6.70
   0  -2   0  180.78    9.30
   0   2   0  167.88    9.30
   0   2   0  187.48    9.30
   1  -2   0 6084.59  220.98
   1  -2   0 6368.06  294.97
   1  -2   0 6094.09  294.87
  -1   2   0 5989.10  271.27
   1   2   0 5816.82  294.77
  -1   2   0 5809.62  271.37
  -1   2   0 6109.29  294.57
  -1   2   0 6289.97  234.38
  -1   2   0 6273.27  234.48
  -1   2   0 5719.63  294.37
   2  -2   0   11.90    0.60
   2  -2   0   11.20    0.60
  -2  -2   0   10.30    1.20
  -2   2   0    9.60    1.10
  -2   2   0   12.20    1.40
   2   2   0   11.10    1.20
   2   2   0   10.00    0.80
  -2   2   0   14.00    1.40
  -3  -2   0 1032.50   40.20
  -3  -2   0  992.30   50.49
  -3   2   0 1023.60   40.30
  -3   2   0 1026.30   37.00
   3   2   0 1067.39   36.20
  -3   2   0 1030.60   35.10
   3   2   0 1046.20   36.30
  -3   2   0  970.20   51.39
   3   2   0 1085.09   38.00
   3   2   0 1041.70   50.59
  -3   2   0 1022.70   39.40
  -4  -2   0 2203.18   84.69
  -4  -2   0 2160.18   77.99
  -4  -2   0 2188.78  106.99
  -4  -2   0 2153.08   88.19
  -4   2   0 2107.19  108.99
   4   2   0 2339.17   80.49
  -4   2   0 2106.59   81.39
  -4   2   0 2241.48   74.19
   4   2   0 2205.88  107.29
   4   2   0 2215.68   76.99
  -4   2   0 2140.49   84.99
   4   2   0 2316.87   76.89
  -4   2   0 2208.68   83.09
  -4   2   0 2172.88   78.09
   4   2   0 2178.28   86.59
  -5  -2   0 1128.99   62.39
  -5  -2   0 1160.58   45.30
  -5  -2   0 1287.77   48.40
  -5  -2   0 1254.47   44.70
  -5  -2   0 1176.08   50.39
  -5   2   0 1257.77   48.70
   5   2   0 1288.07   49.40
  -5   2   0 1278.37   44.90
  -5   2   0 1238.08   62.39
   5   2   0 1270.47   43.70
  -5   2   0 1214.18   46.60
  -5   2   0 1286.77   47.90
   5   2   0 1258.87   61.09
  -5   2   0 1271.57   42.50
   5   2   0 1227.68   43.60
   5   2   0 1288.07   45.90
  -6  -2   0  565.04   21.00
  -6  -2   0  515.85   29.30
  -6  -2   0  560.44   20.90
  -6  -2   0  593.94   22.60
  -6  -2   0  535.45   23.50
  -6   2   0  575.74   22.80
  -6   2   0  533.35   29.20
  -6   2   0  588.14   20.00
   6   2   0  533.45   19.90
   6   2   0  588.64   20.10
   6   2   0  533.75   22.80
  -6   2   0  564.54   21.80
   6   2   0  583.34   21.20
  -6   2   0  579.44   23.00
  -6   2   0  591.44   21.30
  -7  -2   0  992.30   43.20
  -7  -2   0 1104.79   41.60
   7  -2   0 1045.70   38.60
  -7  -2   0 1097.89   38.60
  -7  -2   0 1073.39   53.89
  -7  -2   0 1040.20   38.60
   7  -2   0 1014.80   38.60
  -7   2   0 1080.79   36.60
  -7   2   0 1060.49   41.40
   7   2   0 1003.20   39.10
   7   2   0 1034.90   37.10
   7   2   0 1120.09   42.20
  -7   2   0 1042.40   38.70
  -7   2   0 1056.49   40.20
  -7   2   0 1032.20   53.59
  -7   2   0 1052.99   41.90
   7   2   0 1065.19   37.20
  -8  -2   0 1465.55   72.79
   8  -2   0 1441.86   52.49
   8  -2   0 1393.76   52.59
  -8  -2   0 1510.95   56.39
  -8  -2   0 1368.06   52.19
   8   2   0 1438.56   50.49
  -8   2   0 1396.86   55.89
  -8   2   0 1512.45   49.50
  -8   2   0 1402.66   56.69
   8   2   0 1425.76   50.59
  -8   2   0 1337.37   52.19
   8   2   0 1456.05   57.19
   8   2   0 1387.46   53.09
  -8   2   0 1516.05   72.69
  -9  -2   0    4.20    2.00
  -9  -2   0    4.80    1.60
  -9  -2   0    4.60    0.90
   9  -2   0    4.80    0.70
  -9  -2   0    6.30    0.90
  -9   2   0    6.20    2.10
   9   2   0    3.90    0.70
  -9   2   0    4.30    1.40
  -9   2   0    2.90    1.50
  -9   2   0    4.60    1.80
  -9   2   0    5.80    2.10
   9   2   0    4.60    1.20
 -10  -2   0   31.90    4.40
  10  -2   0   28.30    1.80
 -10  -2   0   27.50    1.60
 -10  -2   0   28.90    1.70
  10  -2   0   24.20    1.80
 -10   2   0   24.40    2.60
 -10   2   0   28.50    4.10
 -10   2   0   24.70    3.70
  10   2   0   26.30    2.40
 -10   2   0   25.10    3.20
  10   2   0   25.00    1.70
 -10   2   0   22.10    3.00
 -11  -2   0  115.19    4.60
  11  -2   0  110.29    5.00
  11  -2   0  108.89    5.40
 -11   2   0  119.79    6.80
  11   2   0  107.39    4.80
 -11   2   0  104.39    7.50
 -11   2   0  111.19    6.60
  11   2   0  104.29    6.00
 -11   2   0  112.99    7.00
 -11   2   0  123.79    8.90
  12  -2   0   33.00    2.60
 -12  -2   0   36.90    2.10
  12  -2   0   31.80    2.40
  12   2   0   33.00    3.10
  12   2   0   42.10    2.60
 -12   2   0   42.20    3.70
 -12   2   0   44.20    4.40
 -12   2   0   38.90    4.20
 -12   2   0   40.30    4.70
 -13  -2   0   12.30    1.10
  13  -2   0   10.80    1.70
 -13  -2   0    8.50    1.20
 -13   2   0   12.20    2.60
 -13   2   0   12.40    1.10
 -13   2   0   13.50    3.20
 -14  -2   0   31.00    1.60
 -14  -2   0   28.40    1.60
 -14   2   0   28.10    1.60
 -14   2   0   27.90    1.50
 -14   2   0   25.60    3.60
 -15  -2   0  612.64   20.90
 -15  -2   0  652.03   20.70
 -15   2   0  645.74   21.00
 -15   2   0  649.83   20.70
 -16  -2   0   53.39    2.30
 -16  -2   0   55.29    2.30
 -16   2   0   52.49    2.40
 -16   2   0   54.89    2.30
 -17  -2   0  323.57   10.70
 -17   2   0  325.97   10.70
 -17   2   0  319.97   10.80
 -18  -2   0   24.30    1.30
 -18   2   0   24.10    1.40
 -18   2   0   25.10    1.50
 -19  -2   0   16.40    1.10
 -19   2   0   17.10    1.10
 -19   2   0   16.30    1.10
 -20  -2   0    5.30    0.50
 -20   2   0    5.60    0.60
   0  -3   0    0.20    0.50
   0  -3   0    0.30    0.40
   0   3   0    1.00    0.60
   0   3   0    2.00    0.80
   0   3   0    0.00    0.60
   0   3   0    0.90    0.70
   0   3   0    1.10    0.70
  -1  -3   0 1485.85   57.29
   1  -3   0 1361.16   52.09
   1  -3   0 1453.05   49.80
   1  -3   0 1364.56   69.49
  -1  -3   0 1348.86   69.59
   1  -3   0 1360.36   69.39
   1  -3   0 1429.66   49.80
  -1   3   0 1502.55   63.99
  -1   3   0 1455.95   55.29
   1   3   0 1437.46   69.59
  -1   3   0 1472.05   53.79
  -1   3   0 1396.76   48.10
  -1   3   0 1380.46   69.29
  -1   3   0 1507.75   63.89
  -1   3   0 1452.45   55.29
  -1   3   0 1320.67   69.29
   2  -3   0 9999.00  469.95
   2  -3   0 9449.55  352.26
  -2  -3   0 9710.23  385.06
   2   3   0 9508.25  469.55
  -2   3   0 9683.73  361.26
  -2   3   0 9588.64  324.07
  -2   3   0 9641.94  370.76
  -3  -3   0 6333.47  315.97
  -3  -3   0 6591.84  259.37
   3  -3   0 6350.86  315.67
   3  -3   0 6702.43  236.78
   3  -3   0 6386.96  236.78
  -3   3   0 6554.94  229.08
  -3   3   0 6896.21  243.58
  -3   3   0 6140.19  233.78
   3   3   0 6447.16  226.98
  -3   3   0 6585.74  249.48
  -3   3   0 6518.95  217.78
   3   3   0 6434.26  316.07
  -4  -3   0 4280.47  209.78
   4  -3   0 4427.26  156.98
  -4  -3   0 4348.86  172.48
   4  -3   0 4359.96  156.98
  -4  -3   0 4312.07  165.48
  -4   3   0 4099.29  159.08
   4   3   0 4103.79  150.78
   4   3   0 4376.06  169.48
  -4   3   0 4221.58  162.08
  -4   3   0 4355.06  152.48
   4   3   0 4376.36  150.68
   4   3   0 4538.35  157.48
   4   3   0 4435.76  209.98
  -4   3   0 4360.86  144.89
   4   3   0 4032.60  150.78
  -4   3   0 4287.87  165.98
  -5  -3   0  419.96   16.40
   5  -3   0  412.96   14.90
  -5  -3   0  422.26   20.20
  -5  -3   0  395.66   17.20
  -5  -3   0  375.96   21.40
  -5  -3   0  371.16   15.30
  -5   3   0  429.86   14.70
  -5   3   0  420.36   16.70
  -5   3   0  394.56   16.80
  -5   3   0  428.46   15.50
  -5   3   0  378.76   15.80
   5   3   0  384.16   16.70
   5   3   0  412.76   14.60
   5   3   0  422.86   15.50
   5   3   0  393.26   14.70
  -5   3   0  395.66   21.20
  -6  -3   0   76.59    3.80
  -6  -3   0   66.09    5.20
  -6  -3   0   66.49    4.10
   6  -3   0   68.09    2.70
   6  -3   0   69.29    2.70
  -6  -3   0   63.09    3.40
   6   3   0   68.29    3.10
  -6   3   0   69.59    5.10
  -6   3   0   67.29    3.80
  -6   3   0   68.39    3.90
   6   3   0   68.89    3.00
   6   3   0   73.79    3.50
  -6   3   0   73.29    4.50
  -6   3   0   71.89    3.70
  -6   3   0   73.79    4.30
  -7  -3   0  289.17   12.10
  -7  -3   0  276.47   11.10
   7  -3   0  277.47   10.50
  -7  -3   0  271.47   12.70
  -7  -3   0  285.07   16.10
   7  -3   0  266.67   10.50
   7   3   0  282.57   10.40
  -7   3   0  293.07   12.70
   7   3   0  291.57   12.20
  -7   3   0  271.07   12.60
  -7   3   0  282.47   11.60
  -7   3   0  271.37   15.70
  -7   3   0  301.97   11.00
  -8  -3   0   88.99    6.80
   8  -3   0   90.59    3.60
  -8  -3   0   90.09    4.80
   8  -3   0   83.79    3.60
  -8  -3   0   86.89    4.10
   8   3   0   90.09    3.80
  -8   3   0   80.59    5.30
  -8   3   0   83.49    5.00
  -8   3   0   75.99    5.50
  -8   3   0   86.69    6.50
  -8   3   0   85.59    4.60
  -9  -3   0   25.70    2.00
   9  -3   0   30.30    1.70
  -9  -3   0   28.10    1.70
  -9  -3   0   31.40    4.20
   9  -3   0   28.60    1.70
  -9   3   0   28.10    2.70
  -9   3   0   28.90    3.30
   9   3   0   25.60    2.50
  -9   3   0   34.80    3.80
  -9   3   0   31.70    4.00
   9   3   0   31.90    1.90
  -9   3   0   27.50    3.00
 -10  -3   0   34.20    4.80
  10  -3   0   41.40    2.20
 -10  -3   0   38.70    2.10
 -10  -3   0   36.60    2.40
 -10   3   0   42.90    4.80
 -10   3   0   37.30    3.10
 -10   3   0   36.40    3.20
 -10   3   0   33.20    4.10
  10   3   0   40.60    2.30
 -10   3   0   34.00    3.70
 -10   3   0   33.10    3.50
 -11  -3   0   82.99    3.80
 -11  -3   0   90.59    3.70
  11  -3   0   87.69    4.00
  11  -3   0   81.09    4.10
 -11   3   0   69.99    5.20
 -11   3   0   81.19    6.40
 -11   3   0   72.39    5.80
 -11   3   0   79.39    5.60
 -11   3   0   76.09    5.20
  12  -3   0  289.67   12.50
 -12  -3   0  295.27   10.90
  12  -3   0  282.77   11.60
 -12   3   0  286.97   15.10
 -12   3   0  296.87   13.70
 -12   3   0  295.37   14.20
 -12   3   0  284.97   14.70
 -13  -3   0  206.28    8.20
  13  -3   0  204.38    9.50
 -13   3   0  211.78    7.20
 -13   3   0  207.78   11.10
 -13   3   0  218.08   12.10
 -13   3   0  224.48   12.40
 -14  -3   0   23.50    1.80
 -14  -3   0   24.10    1.40
 -14   3   0   23.60    1.40
 -14   3   0   23.10    1.40
 -14   3   0   22.20    3.50
 -15  -3   0    6.60    0.80
 -15   3   0    6.70    0.90
 -15   3   0    8.80    2.50
 -15   3   0    6.50    0.80
 -16  -3   0    1.70    0.60
 -16   3   0    0.50    0.60
 -16   3   0    1.40    0.60
 -17  -3   0    8.00    0.80
 -17   3   0    6.10    0.70
 -17   3   0    9.20    0.90
 -18  -3   0    4.10    0.60
 -18   3   0    3.30    0.60
 -18   3   0    2.90    0.70
 -19  -3   0  108.29    3.70
 -19   3   0  106.39    3.70
 -19   3   0  106.19    3.80
 -20  -3   0   42.00    1.60
 -20   3   0   42.20    1.60
   0  -4   0 2375.46   92.19
   0  -4   0 2263.17   80.39
   0  -4   0 2193.78  111.99
   0   4   0 2354.96  103.39
   0   4   0 2324.67   89.29
   0   4   0 2217.48  111.89
   0   4   0 2230.48   77.19
   0   4   0 2309.37  111.99
   0   4   0 2360.06  103.29
   1  -4   0    8.00    1.30
   1  -4   0   10.30    0.90
  -1  -4   0   10.80    1.60
  -1  -4   0   10.60    1.60
   1  -4   0    9.00    1.40
   1  -4   0   11.00    1.10
   1  -4   0   12.60    1.60
   1  -4   0   11.00    1.00
   1   4   0    7.70    1.60
  -1   4   0   10.30    1.40
  -1   4   0    9.80    1.40
  -1   4   0   11.90    1.40
  -1   4   0   11.60    1.40
  -1   4   0   11.70    1.40
  -1   4   0    9.60    1.30
  -1   4   0   10.50    1.70
   1   4   0    7.30    1.50
  -1   4   0    9.70    1.20
   1   4   0    7.10    1.30
   2  -4   0  604.84   21.00
   2  -4   0  613.34   21.00
   2  -4   0  568.14   22.10
   2  -4   0  599.24   24.50
  -2  -4   0  619.74   24.80
  -2  -4   0  570.54   29.80
   2  -4   0  562.54   29.60
   2  -4   0  628.84   23.90
  -2   4   0  637.84   23.40
   2   4   0  575.94   29.80
  -2   4   0  610.84   23.40
  -2   4   0  592.24   21.70
  -2   4   0  588.04   20.80
  -2   4   0  582.14   23.40
   3  -4   0  389.16   16.00
   3  -4   0  377.86   19.20
   3  -4   0  377.76   14.30
  -3  -4   0  387.56   16.40
  -3  -4   0  369.36   19.50
   3   4   0  385.36   13.90
   3   4   0  384.96   19.60
  -3   4   0  388.56   16.10
  -3   4   0  390.26   15.60
  -3   4   0  370.56   14.30
   4  -4   0  420.26   17.40
   4  -4   0  428.46   15.60
  -4  -4   0  424.06   16.80
  -4  -4   0  411.06   21.20
   4  -4   0  407.36   15.50
  -4  -4   0  420.46   17.90
   4   4   0  394.26   21.30
  -4   4   0  436.86   17.50
  -4   4   0  394.96   16.20
  -4   4   0  427.46   15.80
  -4   4   0  411.16   15.10
   4   4   0  426.86   15.10
  -5  -4   0  167.78    9.00
   5  -4   0  159.78    6.40
  -5  -4   0  155.18    6.90
   5  -4   0  168.18    6.30
  -5  -4   0  166.38    8.00
  -5  -4   0  168.98    7.30
  -5  -4   0  152.78    9.80
  -5   4   0  163.28    7.90
  -5   4   0  163.98    6.80
  -5   4   0  168.08    8.00
  -5   4   0  166.38    7.10
  -5   4   0  168.48    7.20
   5   4   0  156.68    7.50
   5   4   0  170.68    6.40
   6  -4   0   24.50    1.40
   6  -4   0   25.90    1.30
  -6  -4   0   27.40    2.20
  -6  -4   0   28.50    2.20
  -6  -4   0   29.00    3.50
  -6  -4   0   26.20    2.00
  -6  -4   0   24.90    2.60
  -6   4   0   20.90    2.20
   6   4   0   24.30    1.60
  -6   4   0   28.70    3.10
  -6   4   0   25.30    2.40
  -6   4   0   23.40    2.70
  -7  -4   0   90.19    4.40
  -7  -4   0   90.59    6.90
   7  -4   0   89.29    3.70
   7  -4   0   85.89    3.60
  -7  -4   0   83.59    5.20
  -7  -4   0   98.99    4.80
   7   4   0   85.09    3.90
  -7   4   0   94.39    4.70
  -7   4   0   72.49    4.80
  -7   4   0   90.99    5.50
  -7   4   0   83.99    5.50
  -8  -4   0   43.10    4.60
  -8  -4   0   36.50    2.50
   8  -4   0   37.50    1.90
   8  -4   0   39.90    2.00
  -8  -4   0   35.30    3.40
  -8   4   0   32.10    3.00
  -8   4   0   37.90    3.80
  -8   4   0   38.30    3.30
  -8   4   0   31.10    3.30
   9  -4   0 1325.37   45.00
  -9  -4   0 1192.88   45.10
  -9  -4   0 1311.37   63.29
   9  -4   0 1211.08   44.90
  -9  -4   0 1171.38   42.70
  -9   4   0 1175.58   49.30
  -9   4   0 1198.38   48.60
  -9   4   0 1173.88   42.90
  -9   4   0 1196.78   45.30
  10  -4   0   41.80    2.30
 -10  -4   0   46.00    2.90
  10  -4   0   42.20    2.30
 -10  -4   0   40.20    5.10
 -10  -4   0   45.50    2.40
 -10  -4   0   44.10    2.00
 -10  -4   0   41.40    2.00
 -10   4   0   38.00    3.70
 -10   4   0   45.40    3.70
 -10   4   0   42.60    4.50
 -10   4   0   41.50    3.50
 -10   4   0   37.20    4.10
 -11  -4   0   27.50    1.90
  11  -4   0   25.80    1.80
 -11  -4   0   25.20    2.20
 -11   4   0   23.20    3.50
 -11   4   0   22.40    3.70
 -11   4   0   24.50    2.90
 -11   4   0   25.40    4.10
 -11   4   0   31.10    3.20
  12  -4   0  119.19    5.50
 -12  -4   0  121.69    5.30
 -12  -4   0  128.89    5.40
  12  -4   0  119.99    5.80
 -12   4   0  127.79    7.50
 -12   4   0  116.69    8.60
 -12   4   0  115.69    8.20
 -12   4   0  131.99    7.80
 -12   4   0  126.19    4.40
  13  -4   0  137.59    7.10
 -13  -4   0  146.19    6.10
 -13  -4   0  145.39    5.00
 -13   4   0  137.29    9.60
 -13   4   0  154.18    5.20
 -13   4   0  157.88    8.70
 -14  -4   0    0.50    0.50
 -14  -4   0    0.50    0.60
 -14  -4   0    1.30    0.90
 -14   4   0    1.50    0.60
 -14   4   0    1.60    0.70
 -14   4   0    1.10    1.80
 -15  -4   0  211.18    7.60
 -15  -4   0  237.38    7.70
 -15   4   0  223.48    7.80
 -15   4   0  229.48    7.70
 -15   4   0  253.77   12.30
 -16  -4   0  154.18    5.20
 -16   4   0  149.19    5.20
 -16   4   0  140.59    5.30
 -17  -4   0    0.20    0.50
 -17   4   0   -0.70    0.60
 -17   4   0   -0.60    0.50
 -18  -4   0   65.89    2.50
 -18   4   0   67.69    2.60
 -18   4   0   68.59    2.70
 -19  -4   0    0.50    0.50
 -19   4   0    1.30    0.50
 -19   4   0   -0.20    0.50
 -20  -4   0    1.50    0.40
   0  -5   0    0.40    1.00
   0  -5   0    0.30    0.40
   0   5   0    0.50    0.70
   0   5   0    0.30    0.80
   0   5   0    1.00    1.00
   0   5   0    0.60    0.70
   0   5   0   -0.30    0.90
   1  -5   0  822.62   30.20
   1  -5   0  786.02   31.70
   1  -5   0  877.71   35.00
   1  -5   0  886.11   30.30
  -1  -5   0  793.12   42.40
  -1  -5   0  881.31   35.20
  -1   5   0  852.41   29.40
  -1   5   0  928.71   42.10
   1   5   0  858.91   39.30
  -1   5   0  872.81   38.90
   1   5   0  812.92   42.30
  -1   5   0  853.01   33.70
  -1   5   0  867.51   38.80
  -1   5   0  863.71   33.80
  -1   5   0  867.41   33.00
   1   5   0  851.41   39.30
  -1   5   0  823.72   42.00
  -2  -5   0  181.48   10.70
   2  -5   0  206.48    9.00
   2  -5   0  191.88   10.60
  -2  -5   0  214.68    9.30
   2  -5   0  201.18    8.60
   2  -5   0  202.28    7.40
   2  -5   0  202.78    7.40
   2  -5   0  197.48    7.90
  -2   5   0  197.58    8.30
  -2   5   0  210.28    8.90
   2   5   0  194.78   10.80
  -2   5   0  206.58    8.30
  -2   5   0  193.58    7.90
  -2   5   0  200.58    7.70
   3  -5   0  343.97   13.50
   3  -5   0  372.36   15.20
   3  -5   0  339.37   12.60
   3  -5   0  334.77   18.10
  -3  -5   0  354.66   15.60
   3  -5   0  361.06   12.70
   3  -5   0  380.76   14.70
   3   5   0  333.97   18.40
  -3   5   0  370.66   14.90
  -3   5   0  370.46   13.60
  -3   5   0  358.26   13.10
   4  -5   0  372.56   14.10
  -4  -5   0  382.16   16.40
   4  -5   0  376.66   15.80
  -4   5   0  341.97   14.60
  -4   5   0  386.86   14.40
  -4   5   0  372.96   16.10
  -4   5   0  377.16   13.80
   5  -5   0 1178.58   42.90
  -5  -5   0 1198.58   48.10
  -5  -5   0 1188.58   45.60
  -5   5   0 1187.38   42.40
  -5   5   0 1136.19   40.40
  -5   5   0 1120.69   46.60
  -5   5   0 1139.79   45.40
  -6  -5   0   23.00    3.60
   6  -5   0   20.80    1.40
  -6  -5   0   24.20    2.70
   6  -5   0   22.90    1.50
  -6   5   0   20.40    2.90
  -6   5   0   22.80    2.50
  -6   5   0   15.20    2.10
  -6   5   0   21.60    2.90
  -7  -5   0   23.30    2.80
   7  -5   0   24.50    1.60
  -7  -5   0   24.90    3.80
   7  -5   0   22.80    1.40
  -7   5   0   23.50    2.50
  -7   5   0   20.30    3.10
  -7   5   0   19.40    2.50
  -7   5   0   29.30    3.30
   8  -5   0   41.80    2.30
  -8  -5   0   42.70    3.80
   8  -5   0   40.40    2.10
  -8  -5   0   49.00    5.00
  -8   5   0   37.80    3.90
  -8   5   0   41.90    4.10
  -8   5   0   42.70    3.30
  -8   5   0   38.90    3.50
   9  -5   0  323.47   12.70
   9  -5   0  335.47   12.80
  -9  -5   0  326.87   12.30
  -9  -5   0  367.26   20.00
  -9   5   0  329.87   13.50
  -9   5   0  324.47   14.10
  -9   5   0  345.07   15.80
  -9   5   0  314.77   15.50
  -9   5   0  312.97   15.30
  10  -5   0   79.79    3.70
  10  -5   0   77.09    3.60
 -10  -5   0   72.49    3.60
 -10  -5   0   77.29    4.40
 -10  -5   0   71.79    3.30
 -10   5   0   74.69    5.30
 -10   5   0   91.79    6.50
 -10   5   0   75.89    5.20
 -10   5   0   76.39    5.00
 -10   5   0   92.59    6.30
 -11  -5   0  336.57   12.20
 -11  -5   0  328.57   12.30
 -11  -5   0  343.17   12.70
  11  -5   0  326.97   13.30
 -11  -5   0  360.96   13.90
  11  -5   0  324.37   13.20
 -11   5   0  348.67   14.30
 -11   5   0  320.27   15.10
 -11   5   0  338.97   16.80
 -11   5   0  327.87   16.80
 -11   5   0  381.96   16.40
 -12  -5   0    9.10    0.70
 -12  -5   0    8.70    1.50
  12  -5   0    7.90    1.30
 -12  -5   0    8.30    1.30
 -12   5   0   10.20    2.40
 -12   5   0    7.00    2.90
 -12   5   0    9.60    0.90
 -12   5   0    8.60    2.90
 -12   5   0    7.10    2.90
 -13  -5   0  169.18    6.90
 -13  -5   0  158.88    5.60
 -13  -5   0  166.18    5.70
 -13   5   0  166.78    5.70
 -13   5   0  170.48    5.90
 -13   5   0  164.78    9.40
 -13   5   0  164.18   10.20
 -14  -5   0   34.10    1.60
 -14  -5   0   40.00    1.80
 -14  -5   0   35.90    2.50
 -14   5   0   37.70    1.80
 -14   5   0   38.30    1.80
 -14   5   0   34.30    3.90
 -15  -5   0   75.59    2.90
 -15  -5   0   80.49    3.80
 -15  -5   0   79.59    3.00
 -15   5   0   77.59    3.10
 -15   5   0   66.79    5.70
 -15   5   0   78.79    3.00
 -16  -5   0  101.39    3.60
 -16  -5   0  101.49    3.70
 -16   5   0  103.59    6.90
 -16   5   0  101.19    3.70
 -16   5   0   98.29    3.80
 -17  -5   0    1.50    0.50
 -17  -5   0    1.40    0.50
 -17   5   0    1.50    0.60
 -17   5   0    1.40    0.60
 -18  -5   0   37.00    1.70
 -18   5   0   39.80    1.80
 -18   5   0   39.60    1.70
 -19  -5   0   25.20    1.20
 -19   5   0   24.00    1.30
   0  -6   0    1.40    1.10
   0  -6   0    0.30    0.50
   0   6   0    1.10    0.90
   0   6   0    0.30    1.00
   0   6   0    1.10    0.90
   0   6   0    0.60    0.80
   0   6   0    2.00    1.00
   0   6   0    0.40    1.20
   1  -6   0    8.40    1.60
   1  -6   0    7.80    0.90
  -1  -6   0    7.00    1.60
  -1   6   0    7.90    1.10
  -1   6   0    8.30    1.30
   1   6   0    6.40    1.60
  -1   6   0    7.20    1.30
  -1   6   0    6.90    1.20
  -1   6   0    8.70    1.40
   1   6   0    4.80    1.20
  -1   6   0   11.40    1.80
  -1   6   0    9.10    1.20
   1   6   0    7.70    1.50
  -1   6   0    6.80    1.20
   2  -6   0  578.44   22.30
  -2  -6   0  629.64   25.10
   2  -6   0  617.44   24.80
   2  -6   0  567.84   21.10
   2  -6   0  580.04   21.20
  -2   6   0  620.04   21.10
  -2   6   0  586.74   23.60
  -2   6   0  549.95   23.50
   2   6   0  576.24   29.90
  -2   6   0  611.64   23.70
   3  -6   0  702.53   26.00
   3  -6   0  651.23   24.70
   3  -6   0  720.03   28.80
   3  -6   0  709.13   24.70
  -3  -6   0  717.53   29.30
  -3   6   0  701.33   27.70
  -3   6   0  685.73   25.50
   3   6   0  657.53   35.00
  -3   6   0  702.53   24.60
   4  -6   0  537.45   19.50
   4  -6   0  524.15   19.50
   4  -6   0  570.14   23.10
   4  -6   0  559.34   20.80
  -4  -6   0  586.24   23.80
   4  -6   0  566.54   22.50
  -4   6   0  544.75   22.40
  -4   6   0  538.75   20.60
  -4   6   0  522.15   19.80
  -5  -6   0   24.90    3.00
   5  -6   0   28.40    2.00
   5  -6   0   26.90    1.70
  -5   6   0   23.70    2.50
  -5   6   0   28.40    3.60
  -5   6   0   24.30    2.50
  -5   6   0   27.80    3.20
   6  -6   0   47.00    2.50
  -6  -6   0   48.40    4.90
  -6  -6   0   41.80    3.80
  -6   6   0   49.99    4.10
  -6   6   0   49.20    3.40
  -6   6   0   42.00    3.30
  -6   6   0   45.50    4.20
  -7  -6   0    2.70    1.70
   7  -6   0    4.10    0.80
  -7  -6   0    5.50    2.40
  -7   6   0    3.90    2.10
  -7   6   0    2.40    1.50
  -7   6   0    4.70    1.60
  -7   6   0    4.80    2.00
  -8  -6   0  226.08   12.10
  -8  -6   0  238.18    9.40
   8  -6   0  243.08    9.70
  -8  -6   0  268.57   15.50
  -8   6   0  253.77   11.10
  -8   6   0  246.28   12.20
  -8   6   0  247.58   10.60
  -8   6   0  250.47   12.60
   9  -6   0  201.38    8.40
  -9  -6   0  210.68    8.20
  -9  -6   0  197.58    8.10
  -9   6   0  205.88   11.10
  -9   6   0  212.38   11.40
  -9   6   0  215.08    9.60
  -9   6   0  217.68   10.00
  -9   6   0  211.28   10.60
 -10  -6   0   13.20    1.50
  10  -6   0   11.90    1.40
 -10  -6   0   12.00    1.30
 -10   6   0   13.50    2.70
 -10   6   0   14.10    3.40
 -10   6   0   12.80    2.60
 -10   6   0   15.40    2.70
 -10   6   0    9.10    2.80
  11  -6   0    5.90    1.00
 -11  -6   0    8.00    1.00
 -11  -6   0    6.40    1.00
 -11  -6   0    6.40    1.20
 -11  -6   0    6.00    0.70
 -11   6   0    5.90    2.10
 -11   6   0    8.00    2.40
 -11   6   0    8.40    3.00
 -11   6   0    3.40    2.50
 -12  -6   0  149.88    4.90
 -12  -6   0  151.88    7.20
 -12  -6   0  151.48    6.40
 -12  -6   0  149.29    5.20
 -12   6   0  126.49    9.50
 -12   6   0  160.18    8.80
 -12   6   0  162.18   10.30
 -12   6   0  152.08    5.30
 -12   6   0  144.79    8.90
 -13  -6   0   16.30    1.90
 -13  -6   0   18.40    1.20
 -13  -6   0   17.30    1.10
 -13  -6   0   17.60    1.80
 -13   6   0   17.50    1.30
 -13   6   0   15.40    1.20
 -13   6   0   14.00    3.00
 -14  -6   0  161.38    6.90
 -14  -6   0  160.18    5.60
 -14  -6   0  161.68    5.60
 -14   6   0  162.98    5.60
 -14   6   0  163.88    5.80
 -14   6   0  166.68    9.50
 -15  -6   0   -0.20    0.50
 -15  -6   0    0.50    0.90
 -15  -6   0    0.20    0.50
 -15   6   0    0.10    0.60
 -15   6   0    0.10    1.80
 -15   6   0    0.20    0.60
 -16  -6   0    2.30    0.60
 -16  -6   0    3.00    0.60
 -16   6   0    2.30    0.70
 -16   6   0    2.40    1.90
 -17  -6   0    5.50    0.60
 -17  -6   0    3.70    0.60
 -17   6   0    4.10    0.70
 -17   6   0    5.20    0.80
 -18  -6   0    6.00    0.60
 -18  -6   0    5.90    0.60
 -18   6   0    7.90    0.80
 -19  -6   0   11.00    0.80
 -19   6   0   11.90    0.90
   0  -7   0   -0.30    1.10
   0   7   0   -1.40    0.80
   0   7   0    1.10    1.00
   0   7   0    0.60    1.00
   0   7   0    0.60    1.10
   0   7   0   -0.10    1.20
  -1  -7   0  119.39    6.30
   1  -7   0  120.89    6.30
  -1   7   0  117.19    6.20
  -1   7   0  114.89    6.10
  -1   7   0  109.69    5.70
  -1   7   0  131.09    6.80
  -1   7   0  119.99    6.70
   1   7   0  117.59    6.10
  -1   7   0  106.09    6.20
   1   7   0  125.29    7.10
   2  -7   0   38.70    3.00
  -2  -7   0   38.80    3.40
   2  -7   0   38.50    2.20
  -2   7   0   40.80    2.60
  -2   7   0   36.80    3.30
   2   7   0   44.30    3.50
  -2   7   0   37.70    2.80
   2   7   0   41.40    3.20
  -2   7   0   38.10    2.40
   3  -7   0   30.70    2.80
   3  -7   0   34.90    1.90
  -3  -7   0   37.30    3.30
   3  -7   0   31.10    2.30
  -3   7   0   31.80    3.20
  -3   7   0   35.50    2.80
  -3   7   0   35.70    2.60
   4  -7   0 1052.09   43.50
   4  -7   0 1032.50   37.40
   4  -7   0 1087.59   37.50
  -4  -7   0 1055.79   44.20
   4  -7   0 1102.19   39.50
  -4   7   0 1019.00   37.10
  -4   7   0 1073.79   41.80
  -4   7   0 1031.40   38.60
   5  -7   0   18.90    1.20
  -5  -7   0   21.50    3.00
   5  -7   0   14.20    1.50
   5  -7   0   16.50    1.10
  -5   7   0   15.10    2.10
  -5   7   0   12.60    2.10
  -5   7   0   15.70    2.70
  -6  -7   0  642.24   30.40
   6  -7   0  717.33   26.60
   6  -7   0  738.33   25.10
  -6  -7   0  732.53   37.70
   6  -7   0  684.93   25.00
  -6   7   0  705.83   29.10
  -6   7   0  699.53   25.80
  -6   7   0  714.13   26.80
   7  -7   0  257.27   10.40
   7  -7   0  265.77    9.40
  -7  -7   0  224.08   12.70
  -7  -7   0  282.37   16.20
  -7   7   0  268.47   11.40
  -7   7   0  264.77   11.10
  -7   7   0  256.87   12.00
  -7   7   0  255.97   12.60
   8  -7   0   25.90    1.90
  -8  -7   0   26.00    3.40
  -8  -7   0   34.10    4.80
  -8  -7   0   28.70    2.00
  -8   7   0   29.60    3.20
  -8   7   0   29.00    1.90
  -8   7   0   31.40    3.30
  -8   7   0   30.50    3.00
  -8   7   0   26.10    3.70
  -9  -7   0   41.20    4.60
  -9  -7   0   56.29    3.00
   9  -7   0   54.99    3.00
  -9   7   0   56.29    4.50
  -9   7   0   59.09    5.40
  -9   7   0   51.79    2.80
  -9   7   0   55.69    4.40
  -9   7   0   50.49    4.30
  10  -7   0  217.38    9.00
 -10  -7   0  222.78    8.50
 -10  -7   0  208.28    8.60
 -10   7   0  199.48    8.60
 -10   7   0  221.38   11.20
 -10   7   0  221.28   10.80
 -10   7   0  238.88   12.30
 -11  -7   0  200.98    6.50
 -11  -7   0  198.58    7.70
 -11  -7   0  208.38    8.20
 -11  -7   0  195.78    7.20
 -11  -7   0  199.58    6.70
 -11   7   0  193.48   10.60
 -11   7   0  195.48    6.80
 -11   7   0  192.48   11.70
 -11   7   0  201.08   10.40
 -12  -7   0  350.66   11.20
 -12  -7   0  340.57   11.50
 -12  -7   0  354.96   13.40
 -12  -7   0  339.17   11.50
 -12  -7   0  356.26   12.80
 -12  -7   0  358.86   12.70
 -12   7   0  351.76   11.70
 -12   7   0  337.67   16.20
 -12   7   0  346.87   11.60
 -12   7   0  380.26   17.30
 -13  -7   0    2.60    1.10
 -13  -7   0    3.70    0.60
 -13  -7   0    3.30    0.60
 -13   7   0    3.20    0.70
 -13   7   0    4.40    2.20
 -13   7   0    4.50    0.80
 -14  -7   0   81.89    3.00
 -14  -7   0   84.49    4.10
 -14  -7   0   75.69    3.00
 -14   7   0   78.59    3.10
 -14   7   0   79.99    3.20
 -14   7   0   78.19    5.90
 -15  -7   0  106.29    4.70
 -15  -7   0   95.39    3.60
 -15  -7   0   98.79    3.60
 -15   7   0   97.49    6.50
 -15   7   0   98.09    3.60
 -15   7   0   94.49    3.70
 -16  -7   0   36.50    1.70
 -16  -7   0   39.00    1.70
  16   7   0   35.60    1.80
 -16   7   0   33.10    3.90
 -16   7   0   33.60    1.80
 -17  -7   0   31.20    1.50
 -17  -7   0   33.60    1.50
 -17   7   0   31.30    1.60
  17   7   0   28.80    1.60
 -18  -7   0    7.80    0.70
 -18  -7   0    6.20    0.60
  18   7   0    7.10    0.70
 -18   7   0    7.50    0.80
  18   7   0    7.40    0.70
 -19  -7   0   -0.10    0.30
   0  -8   0  381.96   18.20
   0   8   0  408.96   17.40
   0   8   0  416.26   20.10
   0   8   0  423.96   17.60
   0   8   0  404.96   19.80
   0   8   0  446.26   21.60
   1  -8   0  164.78    8.70
  -1  -8   0  180.78    9.00
   1   8   0  188.68   10.20
  -1   8   0  173.98    8.10
  -1   8   0  190.78    9.70
   1   8   0  173.68    8.50
  -1   8   0  175.98    8.60
  -1   8   0  176.98    8.60
  -1   8   0  156.58    8.80
   1   8   0  166.18    8.40
  -2  -8   0   63.29    4.50
   2  -8   0   60.59    4.10
  -2   8   0   61.19    4.40
  -2   8   0   56.89    3.30
   2   8   0   66.99    4.40
   2   8   0   63.29    4.70
   3  -8   0  259.07    9.90
  -3  -8   0  253.77   12.50
   3  -8   0  244.18   11.80
  -3   8   0  269.77   12.00
   4  -8   0    0.90    0.70
  -4  -8   0    2.80    1.70
  -4   8   0    2.90    1.40
  -4   8   0    0.30    1.50
  -5  -8   0  204.28   10.80
   5  -8   0  212.08    8.10
  -5   8   0  208.18    9.10
  -5   8   0  196.18    9.00
  -5   8   0  206.68   10.40
   6  -8   0  244.78    9.10
  -6  -8   0  213.78   12.00
  -6   8   0  251.47   11.90
  -6   8   0  224.58   10.40
  -6   8   0  253.67   10.40
  -6   8   0  232.78    9.60
  -6   8   0  237.68   11.10
   7  -8   0   92.19    3.90
   7  -8   0   89.59    4.50
  -7  -8   0   90.69    4.50
  -7  -8   0   91.49    7.80
  -7  -8   0   81.89    6.20
  -7   8   0  100.19    6.60
  -7   8   0   81.69    5.10
  -7   8   0   94.29    5.60
  -7   8   0   90.39    4.30
  -7   8   0   92.89    5.50
  -7   8   0   95.59    5.60
  -8  -8   0    8.90    2.60
   8  -8   0   13.20    1.20
   8  -8   0   11.40    1.40
  -8   8   0   11.90    1.40
  -8   8   0   10.90    2.90
  -8   8   0   12.30    2.40
  -8   8   0   11.60    2.50
  -8   8   0   13.90    2.50
   9  -8   0   41.50    2.60
  -9  -8   0   31.90    4.30
  -9  -8   0   37.70    2.50
   9  -8   0   37.40    2.10
  -9   8   0   38.80    2.40
  -9   8   0   35.90    3.80
  -9   8   0   51.39    5.20
  -9   8   0   40.40    4.00
  10  -8   0  116.29    5.60
 -10  -8   0  124.89    4.20
 -10  -8   0  117.89    4.50
 -10  -8   0  121.59    5.50
 -10   8   0  123.59    4.30
 -10   8   0  107.09    5.20
 -10   8   0  134.39    8.80
 -10   8   0  110.99    7.20
 -10   8   0  117.19    7.40
 -11  -8   0   28.00    1.30
 -11  -8   0   30.00    1.40
 -11  -8   0   28.40    2.40
 -11  -8   0   28.20    1.40
 -11  -8   0   27.90    2.00
 -11  -8   0   30.90    1.50
 -11   8   0   30.30    4.40
 -11   8   0   25.40    2.00
 -11   8   0   28.30    3.60
 -11   8   0   28.30    1.60
 -12  -8   0   15.40    1.50
 -12  -8   0   15.70    1.40
 -12  -8   0   17.30    1.20
 -12  -8   0   16.70    1.90
 -12  -8   0   16.30    0.90
 -12  -8   0   17.80    1.10
 -12   8   0   16.00    1.30
 -12   8   0   15.70    2.90
 -12   8   0   16.70    1.30
  12   8   0   14.80    1.20
 -13  -8   0   13.40    1.10
 -13  -8   0   12.80    1.80
 -13  -8   0   12.50    0.70
 -13  -8   0   11.30    1.00
 -13   8   0    9.60    2.70
  13   8   0   11.80    1.20
 -13   8   0   11.60    1.20
 -13   8   0   11.40    1.10
 -14  -8   0   28.30    1.50
 -14  -8   0   25.30    1.40
 -14  -8   0   28.70    2.40
  14   8   0   27.50    1.60
 -14   8   0   29.30    1.60
 -14   8   0   24.50    3.70
 -15  -8   0    5.70    0.70
 -15  -8   0    5.20    0.70
 -15  -8   0    5.40    1.20
 -15   8   0    3.50    0.70
  15   8   0    4.90    0.70
 -15   8   0    4.30    2.10
 -16  -8   0    9.90    1.30
 -16  -8   0    8.70    0.80
 -16  -8   0    8.70    0.80
  16   8   0    8.50    0.80
 -16   8   0    7.80    2.20
 -16   8   0    6.90    0.80
 -17  -8   0    2.80    0.60
 -17  -8   0    3.20    0.50
  17   8   0    4.00    0.60
 -17   8   0    2.80    0.60
 -18  -8   0   18.00    1.00
 -18  -8   0   17.90    1.00
 -18   8   0   19.70    1.10
  18   8   0   19.40    1.10
  18   8   0   20.10    1.10
   0  -9   0    3.20    1.70
   0   9   0    0.80    1.10
   0   9   0   -0.20    1.00
   0   9   0    1.20    1.60
   0   9   0   -1.00    1.10
  -1  -9   0  609.74   26.40
   1  -9   0  589.74   26.00
  -1   9   0  586.44   27.60
  -1   9   0  584.84   24.80
  -1   9   0  637.94   25.10
  -1   9   0  567.34   27.80
   1   9   0  651.93   25.00
   1   9   0  624.84   25.40
  -2  -9   0  107.89    6.70
   2  -9   0  115.19    6.50
  -2   9   0  113.79    5.40
  -2   9   0  118.19    6.70
   2   9   0  114.59    6.60
  -3  -9   0   20.70    3.10
   3  -9   0   14.80    2.30
  -3   9   0   13.50    2.70
  -4  -9   0   77.79    5.60
  -4   9   0   73.09    4.50
  -4   9   0   84.99    5.70
  -4   9   0   73.09    3.90
  -5  -9   0    7.40    2.20
   5  -9   0    3.20    0.80
  -5   9   0    2.50    1.00
  -5   9   0    0.90    1.80
  -5   9   0    2.90    0.40
  -5   9   0    2.30    1.40
  -5   9   0    2.50    0.40
   6  -9   0  254.27    9.90
  -6  -9   0  256.47   12.60
  -6  -9   0  234.68   13.00
  -6   9   0  261.57   12.70
  -6   9   0  249.97   10.30
  -6   9   0  241.98   11.70
   7  -9   0   65.19    3.40
  -7  -9   0   69.19    3.80
  -7  -9   0   59.39    5.50
  -7  -9   0   68.99    3.70
  -7   9   0   66.59    3.60
  -7   9   0   71.29    4.50
  -7   9   0   73.19    5.00
  -7   9   0   81.19    6.10
   8  -9   0    1.10    0.80
  -8  -9   0    2.50    2.10
  -8   9   0    1.40    0.90
  -8   9   0    2.40    1.80
  -8   9   0   -0.10    1.90
  -8   9   0    1.50    1.90
  -9  -9   0    1.90    0.50
  -9  -9   0    4.30    2.40
  -9  -9   0    2.00    0.50
  -9   9   0    1.20    2.30
  -9   9   0    3.40    2.00
  -9   9   0    3.00    2.10
  -9   9   0    1.30    0.90
  -9   9   0    4.10    0.70
 -10  -9   0   10.10    0.90
 -10  -9   0    9.90    1.00
 -10  -9   0   13.20    1.00
 -10  -9   0    9.10    0.90
 -10  -9   0   13.40    1.80
 -10   9   0   12.50    2.70
 -10   9   0    9.30    1.40
 -10   9   0   11.00    1.00
 -10   9   0   10.00    2.90
 -10   9   0   10.40    3.40
 -11  -9   0    1.00    0.50
 -11  -9   0    0.20    0.50
 -11  -9   0    0.90    0.40
 -11  -9   0    0.70    0.50
 -11  -9   0    0.40    0.90
 -11  -9   0    2.30    1.10
 -11   9   0    0.40    1.90
 -11   9   0    1.40    0.90
 -11   9   0    0.90    0.70
  11   9   0    0.70    0.60
 -12  -9   0   79.19    3.50
 -12  -9   0   74.79    2.90
 -12  -9   0   76.29    2.70
 -12  -9   0   72.59    4.10
 -12  -9   0   71.79    2.80
 -12   9   0   81.19    3.00
  12   9   0   74.29    3.00
 -12   9   0   72.59    5.70
 -13  -9   0    3.70    1.30
 -13  -9   0    3.20    0.40
 -13  -9   0    3.60    0.60
 -13  -9   0    3.10    0.70
  13   9   0    3.30    0.70
 -13   9   0    4.20    2.20
 -13   9   0    2.90    0.80
 -14  -9   0   69.99    2.70
 -14  -9   0   76.09    4.00
 -14  -9   0   69.89    2.80
 -14   9   0   71.29    2.90
  14   9   0   72.49    2.80
 -14   9   0   68.69    5.50
 -15  -9   0   10.00    1.50
 -15  -9   0    9.90    0.90
 -15  -9   0   10.80    1.00
 -15   9   0   11.20    1.20
 -15   9   0   10.80    2.50
  15   9   0   10.90    1.10
 -16  -9   0   20.00    1.10
 -16  -9   0   19.90    1.20
 -16   9   0   20.00    1.30
 -16   9   0   15.00    2.70
  16   9   0   22.70    1.30
 -17  -9   0   31.10    1.40
 -17  -9   0   31.80    1.40
 -17   9   0   30.90    1.50
  17   9   0   28.70    1.50
  17   9   0   34.00    1.50
  18   9   0    8.50    0.80
   0 -10   0   40.90    3.90
   0  10   0   34.30    3.20
   0  10   0   36.30    3.80
   0  10   0   36.50    3.20
   0  10   0   37.50    3.00
  -1 -10   0   13.60    2.70
   1 -10   0   11.80    2.50
   1  10   0   10.00    1.90
  -1  10   0   10.40    1.70
   1  10   0   13.20    2.60
  -1  10   0   12.70    2.70
   1  10   0    7.40    2.10
  -1  10   0   10.80    1.80
  -1  10   0   14.10    2.00
  -2 -10   0    1.90    1.70
   2 -10   0    3.50    1.70
   2  10   0    1.50    1.80
  -2  10   0    0.40    1.00
  -2  10   0    1.90    1.80
  -2  10   0   -1.80    1.00
   2  10   0    0.30    1.80
  -2  10   0    2.10    0.80
   3 -10   0    2.30    1.60
  -3 -10   0    4.10    2.00
  -3  10   0    3.60    1.20
  -3  10   0    1.20    1.90
  -3  10   0    5.30    1.60
  -4 -10   0   30.60    4.30
  -4  10   0   31.00    2.50
  -4  10   0   34.00    4.00
  -4  10   0   30.90    1.80
  -4  10   0   29.70    2.80
  -5 -10   0    1.60    2.00
  -5  10   0    3.40    1.20
  -5  10   0    0.50    1.90
  -5  10   0    3.60    1.50
  -6 -10   0   59.39    3.70
  -6 -10   0   48.20    5.10
  -6  10   0   56.19    4.10
  -6  10   0   54.99    3.30
  -6  10   0   63.49    5.60
  -7 -10   0   24.30    1.80
  -7 -10   0   25.30    4.30
  -7 -10   0   25.20    2.00
  -7  10   0   26.00    4.30
  -7  10   0   27.30    3.30
  -7  10   0   29.30    3.00
  -7  10   0   24.50    2.20
  -8 -10   0   19.40    1.30
  -8 -10   0   22.30    1.30
  -8 -10   0   20.50    3.90
  -8  10   0   24.50    2.10
  -8  10   0   20.20    4.00
  -8  10   0   24.00    3.40
  -9 -10   0    2.90    2.40
  -9 -10   0    0.70    0.50
  -9 -10   0    0.70    0.60
  -9 -10   0    1.20    0.50
  -9  10   0    3.70    2.80
  -9  10   0    2.10    2.00
  -9  10   0   -0.70    0.90
  -9  10   0    0.80    0.70
 -10 -10   0   -0.10    0.50
 -10 -10   0    0.50    0.50
 -10 -10   0    2.00    0.60
 -10 -10   0   -0.50    0.40
 -10  10   0   -0.30    0.60
  10  10   0    0.10    0.60
 -10  10   0    1.00    1.00
 -10  10   0   -0.50    1.80
 -11 -10   0   33.40    1.70
 -11 -10   0   33.20    2.40
 -11 -10   0   38.40    1.80
 -11 -10   0   35.40    1.50
 -11 -10   0   33.10    1.70
  11  10   0   34.60    1.80
 -11  10   0   34.50    1.80
 -11  10   0   28.90    4.00
 -11  10   0   36.10    2.50
 -12 -10   0   36.10    1.70
 -12 -10   0   36.00    1.50
 -12 -10   0   31.50    2.70
 -12 -10   0   29.10    2.10
  12  10   0   38.20    1.80
 -12  10   0   35.40    1.80
 -12  10   0   31.00    4.00
 -13 -10   0   60.59    2.10
 -13 -10   0   60.99    3.70
 -13 -10   0   58.79    2.50
  13  10   0   64.89    2.60
 -13  10   0   60.09    2.60
 -13  10   0   59.59    5.20
 -14 -10   0    0.60    0.50
 -14 -10   0    0.80    1.00
 -14  10   0   -0.50    0.60
 -14  10   0    1.80    1.90
  14  10   0    0.10    0.60
 -15 -10   0    3.70    0.70
 -15 -10   0    2.70    1.10
 -15  10   0    2.40    1.90
 -15  10   0    3.00    0.70
  15  10   0    3.30    0.70
 -16 -10   0   25.80    1.40
 -16  10   0   26.00    1.40
  16  10   0   28.50    1.40
 -17 -10   0    0.20    0.40
  17  10   0    1.40    0.50
  17  10   0    0.00    0.50
   0 -11   0    0.20    1.50
   0  11   0    1.00    1.20
   0  11   0    0.70    1.80
   0  11   0    0.10    1.00
   0  11   0    0.60    1.10
   0  11   0    0.10    0.80
   1 -11   0    0.20    1.40
  -1 -11   0    1.20    1.70
  -1  11   0   -0.50    1.60
   1  11   0   -0.50    1.10
   1  11   0    0.40    0.70
  -1  11   0    1.00    1.00
   1  11   0    0.50    1.40
  -1  11   0    0.40    1.10
   1  11   0    1.00    1.40
   1  11   0   -0.30    0.60
   1  11   0   -1.50    1.50
  -2 -11   0  184.28    9.90
   2 -11   0  170.18    9.30
  -2  11   0  160.08    7.20
  -2  11   0  175.98    7.70
   2  11   0  168.58    8.90
   2  11   0  168.08    9.10
   2  11   0  178.18    9.30
  -2  11   0  182.38    9.70
  -2  11   0  148.69    8.50
  -3 -11   0   33.80    4.10
  -3  11   0   27.40    2.60
   3  11   0   30.90    2.90
  -3  11   0   30.10    2.00
  -3  11   0   28.30    2.80
  -3  11   0   29.00    4.00
   3  11   0   32.70    3.90
  -4 -11   0  166.18    9.90
  -4  11   0  176.88    9.80
  -4  11   0  167.68    6.40
  -4  11   0  155.68    8.40
  -4  11   0  166.28    7.50
  -4  11   0  161.08    6.40
  -5 -11   0   15.90    3.30
  -5  11   0   15.60    2.40
  -5  11   0   20.20    2.20
  -5  11   0   20.80    3.80
  -6 -11   0    0.80    0.80
  -6 -11   0    0.70    2.00
  -6  11   0    1.50    1.10
  -6  11   0   -0.10    1.30
  -6  11   0   -3.00    2.00
  -7 -11   0    7.00    2.70
  -7 -11   0    7.00    0.80
  -7 -11   0    6.90    0.70
  -7 -11   0    6.70    0.90
  -7 -11   0    7.90    1.10
  -7  11   0   13.80    3.60
  -7  11   0   10.70    2.50
  -7  11   0    7.90    2.10
  -7  11   0    7.70    1.50
  -8 -11   0   14.80    3.80
  -8 -11   0   20.40    1.30
  -8 -11   0   24.40    1.40
  -8  11   0   18.70    2.20
  -8  11   0   16.70    3.20
  -9 -11   0   10.30    1.10
  -9 -11   0   11.90    1.10
  -9  11   0    5.80    2.40
   9  11   0    9.50    0.90
  -9  11   0    9.30    1.60
  -9  11   0   11.60    1.00
 -10 -11   0    2.00    0.60
 -10 -11   0    0.60    0.60
 -10 -11   0    1.20    0.60
 -10 -11   0    1.80    0.50
  10  11   0    1.30    0.60
 -10  11   0    2.20    0.70
 -10  11   0    0.40    1.10
 -10  11   0    0.70    2.00
 -11 -11   0   79.79    3.10
 -11 -11   0   83.59    3.10
 -11 -11   0   76.69    3.20
 -11 -11   0   69.49    3.90
 -11 -11   0   81.59    2.80
  11  11   0   77.19    3.10
 -11  11   0   71.19    5.80
 -11  11   0   80.19    3.10
 -11  11   0   76.09    4.10
 -12 -11   0   25.10    1.90
 -12 -11   0   29.00    1.50
 -12 -11   0   29.00    1.30
  12  11   0   27.40    1.60
 -12  11   0   22.70    3.60
 -12  11   0   26.90    1.60
 -12  11   0   24.10    2.10
 -13 -11   0   45.80    2.10
 -13 -11   0   50.49    3.30
 -13 -11   0   46.30    1.80
  13  11   0   52.49    2.20
 -13  11   0   52.89    2.20
 -13  11   0   49.90    4.60
 -14 -11   0  187.68    6.30
 -14 -11   0  189.58    7.80
 -14  11   0  183.88   10.00
 -14  11   0  172.48    6.30
  14  11   0  187.68    6.40
 -15 -11   0    4.60    0.70
  15  11   0    4.50    0.70
 -15  11   0    2.60    1.80
 -16 -11   0   30.00    1.40
  16  11   0   29.10    1.40
  16  11   0   30.30    1.40
  17  11   0   -0.40    0.40
   0 -12   0  116.99    7.60
   0  12   0  115.29    6.40
   0  12   0  113.29    5.90
   0  12   0  110.19    7.50
  -1 -12   0   79.19    5.80
   1 -12   0   63.89    5.20
  -1  12   0   61.99    3.80
   1  12   0   62.39    5.60
  -1  12   0   58.09    5.50
  -1  12   0   68.09    4.10
   1  12   0   60.29    4.50
   1  12   0   56.49    4.70
   1  12   0   62.99    4.30
   2 -12   0   43.70    4.60
  -2 -12   0   48.50    5.00
   2  12   0   50.99    4.70
   2  12   0   52.79    3.20
   2  12   0   50.69    5.10
  -2  12   0   51.09    2.90
  -2  12   0   57.89    3.70
  -2  12   0   58.99    5.50
   2  12   0   52.99    3.10
  -3 -12   0   21.50    3.90
   3  12   0   16.70    3.40
  -3  12   0   19.50    3.80
   3  12   0   19.10    2.40
  -3  12   0   18.10    1.60
  -3  12   0   17.20    2.20
  -4 -12   0    0.90    2.00
  -4  12   0    1.00    2.10
  -4  12   0    0.50    0.70
   4  12   0   -1.30    2.20
  -4  12   0    0.80    1.30
   4  12   0    0.00    1.30
  -4  12   0    0.90    0.70
  -5 -12   0   45.50    2.10
  -5 -12   0   41.70    5.20
  -5 -12   0   50.29    2.20
  -5  12   0   51.99    3.50
  -5  12   0   47.30    5.40
  -5  12   0   43.60    1.60
  -6 -12   0   -0.40    0.80
  -6 -12   0    0.20    0.30
  -6 -12   0    1.10    0.60
  -6 -12   0   -0.20    0.30
  -6 -12   0    1.50    2.30
  -6  12   0   -0.10    1.50
  -6  12   0    1.20    2.60
  -6  12   0    0.70    1.20
  -7 -12   0   82.59    3.20
  -7 -12   0   78.79    3.30
  -7 -12   0   77.29    3.10
  -7  12   0   75.99    4.50
   7  12   0   82.39    3.10
  -7  12   0   89.39    6.20
  -8 -12   0    7.90    0.80
  -8 -12   0    6.50    0.80
   8  12   0    5.90    0.80
  -8  12   0    8.50    2.60
  -8  12   0    6.50    1.60
  -9 -12   0   26.00    1.50
  -9 -12   0   28.40    1.60
  -9  12   0   24.70    2.50
  -9  12   0   17.00    3.30
   9  12   0   26.70    1.50
 -10 -12   0    1.90    0.50
 -10 -12   0    1.90    0.60
 -10 -12   0    1.70    0.60
 -10  12   0    1.30    1.10
 -10  12   0    0.10    2.10
  10  12   0    0.70    0.60
 -11 -12   0    9.90    1.10
 -11 -12   0   13.40    1.10
 -11 -12   0   11.00    0.90
 -11  12   0   12.80    2.90
  11  12   0   12.00    1.20
 -11  12   0   10.90    1.70
 -12 -12   0    3.40    0.70
 -12 -12   0    5.20    1.00
 -12 -12   0    4.10    0.50
  12  12   0    3.50    0.70
 -12  12   0    1.40    2.00
 -13 -12   0   22.40    1.00
 -13 -12   0   21.10    1.30
  13  12   0   22.80    1.40
 -13  12   0   22.50    3.30
 -14 -12   0   15.60    1.20
 -14  12   0   13.50    2.60
  14  12   0   13.90    1.20
 -15 -12   0    4.20    0.60
  15  12   0    3.10    0.60
 -16 -12   0    5.10    0.60
  16  12   0    5.10    0.60
  16  12   0    5.60    0.60
   0 -13   0   -2.30    1.70
   0  13   0   -0.30    2.10
   1 -13   0   37.00    4.40
  -1 -13   0   40.30    4.70
  -1  13   0   30.40    4.70
   1  13   0   43.60    5.10
  -1  13   0   35.90    1.60
  -2 -13   0   20.50    3.80
  -2  13   0   23.10    4.20
  -2  13   0   15.80    2.20
  -2  13   0   20.00    1.10
  -2  13   0   20.00    1.90
   2  13   0   19.90    4.00
  -3 -13   0  631.54   29.10
   3  13   0  643.74   30.10
  -3  13   0  635.84   22.70
   3  13   0  637.94   30.10
  -3  13   0  619.14   19.90
  -3  13   0  620.74   24.90
  -3  13   0  576.24   27.50
  -4 -13   0    3.70    2.70
  -4 -13   0   -0.70    0.60
  -4  13   0    0.40    0.60
   4  13   0   -1.30    1.10
  -4  13   0   -0.50    0.40
  -4  13   0   -0.40    1.30
  -4  13   0    1.00    0.60
  -5 -13   0  304.37   11.50
  -5 -13   0  296.77   10.70
  -5 -13   0  298.67   10.50
   5  13   0  298.77   15.50
  -5  13   0  301.17   12.80
   5  13   0  299.77   11.40
  -6 -13   0   30.70    2.50
  -6 -13   0   32.40    1.70
  -6 -13   0   31.00    1.70
   6  13   0   29.40    1.60
  -6  13   0   30.10    2.90
   6  13   0   29.00    1.50
  -7 -13   0   32.80    1.90
  -7 -13   0   34.90    1.80
  -7  13   0   31.40    4.00
  -7  13   0   35.10    3.10
   7  13   0   38.40    1.80
  -8 -13   0   39.80    1.90
  -8 -13   0   39.60    1.90
  -8  13   0   34.10    4.20
  -8  13   0   36.00    3.00
   8  13   0   37.10    1.80
  -9 -13   0    0.60    0.60
  -9 -13   0    0.60    0.60
   9  13   0    0.40    0.60
  -9  13   0   -0.80    1.10
  -9  13   0    0.10    2.10
 -10 -13   0    0.60    0.60
 -10 -13   0    1.00    0.50
 -10 -13   0    0.40    0.60
 -10  13   0    1.20    1.20
  10  13   0    0.60    0.60
 -10  13   0    0.00    2.00
 -11 -13   0   39.50    1.80
 -11 -13   0   39.10    1.60
 -11 -13   0   41.30    1.90
 -11  13   0   41.10    4.40
  11  13   0   38.50    1.90
 -12 -13   0   -0.90    0.60
 -12 -13   0    0.40    0.40
 -12 -13   0    0.00    0.50
  12  13   0    0.50    0.60
 -12  13   0   -0.30    1.70
 -13 -13   0  223.08    7.10
 -13 -13   0  226.38    7.50
  13  13   0  220.18    7.60
 -13  13   0  224.78   11.60
 -14 -13   0    6.90    0.70
  14  13   0    5.20    0.60
  14  13   0    6.10    0.70
 -15 -13   0   79.89    2.80
  15  13   0   77.99    2.80
  15  13   0   75.89    2.80
   0 -14   0  145.69    5.20
   1 -14   0    0.40    0.50
  -1 -14   0    0.40    0.50
  -1  14   0    0.30    0.50
   2 -14   0   16.20    1.30
  -2 -14   0   14.30    1.20
  -2  14   0   12.10    1.60
  -2  14   0   15.90    1.00
   3 -14   0   10.50    0.90
  -3 -14   0    9.50    0.90
  -3  14   0   12.10    0.90
  -3  14   0   10.40    1.30
  -3  14   0   10.70    1.30
  -4 -14   0    0.00    0.60
   4 -14   0    0.80    0.60
  -4 -14   0    1.50    0.50
  -4  14   0    0.00    1.30
  -4  14   0    0.50    0.40
  -5 -14   0    0.20    0.60
  -5 -14   0    0.30    1.00
  -5 -14   0    0.20    0.50
  -5 -14   0    0.70    0.70
  -5  14   0   -0.40    1.30
   5  14   0    0.30    1.00
  -6 -14   0    4.10    1.00
  -6 -14   0    5.10    0.80
  -6 -14   0    4.40    0.80
  -6  14   0    3.30    1.50
  -6  14   0    3.00    2.20
   6  14   0    6.00    1.50
  -7 -14   0   11.00    1.20
  -7 -14   0   11.80    1.30
   7  14   0    7.50    1.80
  -7  14   0   10.70    1.90
  -7  14   0   11.80    2.80
   7  14   0   11.00    0.90
  -8 -14   0   62.69    2.60
   8  14   0   55.69    2.40
  -8  14   0   58.19    3.90
  -8  14   0   59.09    5.20
   8  14   0   58.29    2.50
  -9 -14   0    2.50    0.70
   9  14   0    2.60    0.70
  -9  14   0    1.50    2.30
   9  14   0    2.80    0.60
 -10 -14   0    3.90    0.60
 -10 -14   0    5.80    0.80
 -10 -14   0    4.10    0.70
 -10  14   0    8.40    2.50
  10  14   0    4.80    0.60
  10  14   0    5.20    0.70
 -11 -14   0    3.10    0.50
 -11 -14   0    2.00    0.60
 -11 -14   0    3.30    1.00
 -11 -14   0    2.90    0.60
  11  14   0    2.80    0.60
  11  14   0    2.60    0.60
 -11  14   0    3.00    2.10
 -12 -14   0   -0.20    0.40
 -12 -14   0    0.20    0.60
 -12 -14   0    0.30    0.50
  12  14   0    0.80    0.50
 -12  14   0    0.20    1.70
  12  14   0    0.60    0.50
 -13 -14   0    0.50    0.50
  13  14   0   -0.30    0.40
  13  14   0    0.20    0.50
  13  14   0    0.20    0.50
 -14 -14   0    3.00    0.50
  14  14   0    3.50    0.40
  14  14   0    3.10    0.50
  14  14   0    3.20    0.50
   0 -15   0    0.00    0.50
   0  15   0    0.40    0.50
   1 -15   0   32.20    1.70
  -1 -15   0   35.20    1.70
  -1  15   0   35.90    1.50
   1  15   0   33.50    1.60
  -1  15   0   31.20    2.50
  -2 -15   0  203.48    7.10
   2 -15   0  203.58    7.10
  -2  15   0  213.78    6.70
  -2  15   0  198.18    8.20
  -3 -15   0   13.20    1.10
   3 -15   0   12.60    1.10
  -3  15   0   11.50    0.80
  -3  15   0   11.30    1.10
  -3  15   0   12.30    1.10
  -4 -15   0  195.48    7.60
   4 -15   0  196.88    6.80
  -4 -15   0  182.98    6.70
  -4 -15   0  195.98    7.00
  -4 -15   0  199.48    7.20
  -5 -15   0   97.09    3.70
  -5 -15   0   87.19    5.50
   5 -15   0   92.39    3.50
  -5 -15   0   96.89    3.80
  -6 -15   0  167.08    6.30
   6 -15   0  167.08    6.00
  -6 -15   0  172.48    6.20
  -6  15   0  174.58    9.90
  -7 -15   0    0.60    0.60
  -7 -15   0    0.50    0.60
   7  15   0    4.60    1.20
  -7  15   0    0.60    2.10
   7  15   0    0.00    0.80
  -8 -15   0    1.30    0.60
  -8  15   0    1.20    2.00
   8  15   0    1.40    1.10
  -9 -15   0   23.80    1.50
   9  15   0   23.60    2.50
  -9  15   0   24.50    3.60
 -10 -15   0   16.50    1.00
 -10 -15   0   14.70    1.20
  10  15   0   16.80    2.10
 -10  15   0   15.30    2.80
 -11 -15   0   35.50    1.60
 -11 -15   0   35.20    1.50
  11  15   0   35.70    1.60
  11  15   0   33.90    1.60
 -11  15   0   34.80    4.30
 -12 -15   0   57.49    2.00
 -12 -15   0   55.09    2.20
  12  15   0   53.49    2.10
  12  15   0   56.39    2.10
  13  15   0    0.60    0.40
   0 -16   0  153.18    5.30
   0  16   0  147.89    5.00
   0  16   0  140.99    6.40
  -1 -16   0   42.80    1.90
   1 -16   0   43.30    2.00
   1  16   0   41.60    1.80
  -1  16   0   42.40    2.70
  -1  16   0   40.60    1.70
   2 -16   0  114.29    4.10
  -2 -16   0  110.29    4.10
  -2  16   0  111.99    4.50
  -2  16   0  110.39    3.80
   2  16   0  113.19    4.00
  -2  16   0  111.99    4.60
  -3 -16   0   22.00    1.40
  -3 -16   0   18.40    1.30
   3 -16   0   19.90    1.40
  -3  16   0   19.90    0.90
  -4 -16   0    0.10    0.70
   4 -16   0   -1.10    0.50
  -4 -16   0    1.90    1.10
  -4 -16   0    0.80    0.70
  -5 -16   0    2.20    0.70
   5 -16   0    2.00    0.60
  -5 -16   0    0.40    0.70
  -5 -16   0    1.40    0.80
  -5  16   0    0.80    2.00
   6 -16   0    0.30    0.50
  -6 -16   0    0.70    0.60
  -6 -16   0    0.30    0.60
  -6  16   0   -1.30    1.70
  -7 -16   0   29.50    1.60
   7 -16   0   26.90    1.40
  -7 -16   0   26.40    1.60
  -7  16   0   28.90    3.90
  -8 -16   0    8.80    0.90
  -8  16   0    7.60    2.60
  -9 -16   0   40.50    1.80
  -9 -16   0   37.70    1.60
  -9  16   0   35.90    4.00
 -10 -16   0   13.50    1.10
 -10 -16   0   16.40    0.90
 -11 -16   0    3.00    0.40
   0 -17   0    0.00    0.50
   0  17   0    0.90    0.50
   0  17   0    0.20    0.90
  -1 -17   0    1.40    0.50
   1 -17   0    2.10    0.60
  -1  17   0    2.10    0.50
   1  17   0    0.80    1.10
  -1  17   0    3.20    0.90
   1  17   0    2.60    0.60
  -1  17   0    1.50    0.80
   2 -17   0   -0.90    0.50
  -2 -17   0    0.70    0.50
   2  17   0    0.10    0.50
  -2  17   0    0.70    0.30
  -3 -17   0   17.70    1.20
   3 -17   0   20.20    1.30
  -3 -17   0   18.40    1.50
  -3 -17   0   18.60    1.20
   3  17   0   20.30    1.20
  -4 -17   0   41.00    2.90
   4 -17   0   38.60    1.80
  -4 -17   0   36.10    1.90
  -4 -17   0   36.20    1.90
  -5 -17   0   16.00    1.40
  -5 -17   0   19.30    1.40
   5 -17   0   20.80    1.30
  -5  17   0   27.40    3.60
  -6 -17   0   31.60    1.70
  -6 -17   0   31.10    1.70
   6 -17   0   31.90    1.60
  -6  17   0   33.80    3.90
  -7 -17   0    2.90    0.70
   7 -17   0    2.30    0.50
  -7  17   0    4.30    2.10
  -8 -17   0   -0.50    0.50
   8 -17   0    0.10    0.50
  -9 -17   0   17.10    1.00
  -9 -17   0   18.10    1.20
 -10 -17   0   57.79    2.10
   0 -18   0   66.49    2.60
   0  18   0   66.79    2.40
   1 -18   0   52.99    2.20
  -1 -18   0   55.79    2.50
  -1 -18   0   50.79    2.40
  -1 -18   0   55.89    2.20
   1  18   0   55.89    2.90
   1  18   0   57.89    2.10
  -1  18   0   52.99    1.90
  -2 -18   0   12.60    1.00
   2 -18   0   14.70    1.10
  -2 -18   0   11.90    1.20
  -2 -18   0   13.70    1.00
   2  18   0   12.90    1.00
   2  18   0   10.20    1.50
  -3 -18   0   17.50    1.30
  -3 -18   0   20.00    2.00
   3 -18   0   17.60    1.20
   3  18   0   20.90    1.20
  -4 -18   0    0.20    0.60
  -4 -18   0   -0.10    0.60
   4 -18   0    0.00    0.50
   4  18   0   -0.10    0.50
  -4  18   0    0.50    1.70
  -5 -18   0    4.40    0.70
  -5 -18   0    5.30    0.70
   5 -18   0    5.80    0.60
   5  18   0    4.90    0.60
  -6 -18   0   19.00    1.20
   6 -18   0   19.20    1.10
   7 -18   0    8.20    0.80
  -7 -18   0    9.70    1.00
   8 -18   0  140.39    4.90
  -8 -18   0  141.79    5.00
   0 -19   0   -0.50    0.60
   0 -19   0    0.10    0.50
   0 -19   0   -0.80    0.40
  -1 -19   0    0.00    0.60
   1 -19   0    0.30    0.50
  -1 -19   0    0.00    0.40
   1  19   0    0.60    0.30
   2 -19   0    0.90    0.50
  -2 -19   0    0.90    0.60
   2  19   0    1.10    0.40
  -3 -19   0    0.70    0.50
   3 -19   0    1.30    0.50
   3  19   0    1.30    0.40
  -4 -19   0   -0.70    0.50
   4 -19   0    0.10    0.40
  -4 -19   0    0.80    0.50
   4  19   0   -0.40    0.40
  -5 -19   0   12.90    1.00
  -5 -19   0   14.20    1.00
   5 -19   0   14.10    0.90
   5  19   0   13.30    0.90
  -6 -19   0    0.40    0.50
   6 -19   0    0.70    0.40
   7 -19   0   16.10    0.90
   0 -20   0    4.70    0.50
   0 -20   0    5.50    0.60
  -1 -20   0   31.80    1.50
   1 -20   0   30.60    1.40
   1 -20   0   32.70    1.50
   2 -20   0    7.70    0.90
   2 -20   0    9.00    0.80
   3 -20   0   20.00    1.20
   3 -20   0   22.10    1.10
   4 -20   0    0.40    0.40
 -20   0   1    0.20    0.40
 -20   0   1    0.50    0.40
 -19   0   1   57.79    2.30
 -19   0   1   56.09    2.20
 -18   0   1    0.50    0.60
 -18   0   1    0.30    0.50
 -17   0   1   59.49    2.50
 -17   0   1   59.89    2.50
 -16   0   1    0.70    0.70
 -16   0   1    0.50    0.60
 -15   0   1   60.19    2.50
 -15   0   1   61.19    2.60
 -14   0   1   -0.90    0.50
  14   0  -1   -0.90    1.10
 -14   0   1    0.80    0.60
  13   0  -1   66.29    4.60
 -13   0   1   78.09    2.90
 -12   0   1   -0.30    1.40
  12   0  -1    1.40    1.00
  12   0  -1    0.00    0.60
 -11   0   1  500.75   23.30
  11   0  -1  521.05   18.80
  11   0  -1  530.65   21.90
 -11   0   1  539.25   28.90
 -10   0   1    0.00    0.50
 -10   0   1   -1.30    1.40
  10   0  -1    0.10    0.40
  10   0  -1   -0.30    0.80
  10   0  -1   -0.10    0.70
  10   0  -1    0.40    0.40
 -10   0   1   -0.80    1.20
  -9   0   1   34.00    3.10
   9   0  -1   29.90    1.40
  -9   0   1   37.10    4.00
   9   0  -1   31.40    1.40
   9   0  -1   30.70    2.00
  -9   0   1   27.00    3.60
   9   0  -1   29.90    2.20
  -9   0   1   29.70    1.60
  -9   0   1   31.30    1.60
  -9   0   1   29.80    3.10
  -8   0   1    0.00    0.50
  -8   0   1   -0.70    1.60
  -8   0   1   -1.40    1.40
  -8   0   1   -1.10    1.10
   8   0  -1   -0.60    0.70
  -8   0   1   -0.50    1.30
  -8   0   1   -1.40    1.30
   8   0  -1   -0.40    0.60
  -7   0   1  172.78    6.80
  -7   0   1  167.08   10.20
   7   0  -1  166.68    6.90
  -7   0   1  178.08    8.60
   7   0  -1  177.58    7.50
  -7   0   1  180.08    7.70
  -7   0   1  175.88    7.90
  -7   0   1  180.28    8.00
  -7   0   1  171.28    6.80
   6   0  -1   -0.80    0.50
  -6   0   1   -3.10    1.20
  -6   0   1   -3.60    0.90
  -6   0   1   -3.20    0.80
  -6   0   1   -2.10    0.80
  -6   0   1   -2.60    1.00
  -6   0   1   -3.60    0.90
   6   0  -1   -2.60    0.60
  -5   0   1 1558.44   54.29
  -5   0   1 1560.54   62.19
   5   0  -1 1637.24   78.49
  -5   0   1 1553.74   79.99
  -5   0   1 1638.54   60.09
  -5   0   1 1611.74   57.49
   5   0  -1 1667.43   58.79
  -5   0   1 1617.74   61.39
  -4   0   1    0.30    1.10
  -4   0   1   -1.20    0.90
   4   0  -1   -0.60    0.40
  -4   0   1   -1.30    1.10
  -4   0   1    0.10    0.90
  -4   0   1   -0.20    1.30
   4   0  -1   -0.10    0.70
  -3   0   1  945.81   36.60
  -3   0   1  985.70   37.20
  -3   0   1  948.11   35.90
   3   0  -1  976.80   46.90
  -3   0   1  901.21   47.70
   3   0  -1  962.00   46.80
   3   0  -1  965.50   35.10
   3   0  -1  971.00   35.10
  -2   0   1   -0.10    0.20
  -2   0   1   -0.40    0.30
  -2   0   1   -0.20    0.20
  -2   0   1   -0.10    0.30
   2   0  -1   -0.20    0.10
   2   0  -1   -0.10    0.30
   2   0  -1   -0.40    0.30
  -2   0   1    0.10    0.30
   2   0  -1   -0.10    0.10
   0   0   1  -10.20    0.10
   0   0  -1  -10.30    0.10
   0   0  -1   -9.50    0.20
   0   0   1  -10.20    0.10
  -1   0  -1  501.45   25.10
  -2   0  -1   -1.50    0.50
  -3   0  -1 1079.09   54.59
  -3   0  -1 1087.39   41.60
  -3   0  -1 1120.59   42.50
  -3   0  -1 1087.29   37.10
  -4   0  -1   -0.70    0.90
  -4   0  -1    2.20    1.20
  -4   0  -1    1.00    1.20
  -4   0  -1    0.70    0.40
  -4   0  -1    1.00    0.80
  -4   0  -1    0.20    0.90
  -5   0  -1  467.65   18.50
  -5   0  -1  458.35   17.10
  -5   0  -1  449.95   18.40
  -5   0  -1  453.55   16.00
   5   0   1  466.85   16.80
  -5   0  -1  435.26   23.70
   6   0   1    1.00    0.40
   6   0   1    1.00    0.40
  -6   0  -1    1.10    1.00
  -6   0  -1    1.60    1.40
  -6   0  -1   -0.40    1.20
  -6   0  -1    0.70    1.00
  -6   0  -1    1.60    0.90
  -7   0  -1 3084.89  117.19
  -7   0  -1 3039.40  153.58
  -7   0  -1 3200.48  109.99
   7   0   1 2949.70  112.59
  -7   0  -1 3141.29  104.19
  -7   0  -1 3153.88  119.49
   7   0   1 3016.80  121.19
  -8   0  -1   -0.30    1.50
  -8   0  -1    1.40    1.30
   8   0   1    0.10    0.60
   8   0   1    0.00    0.50
  -8   0  -1    0.90    1.10
  -8   0  -1    0.30    1.30
  -8   0  -1   -0.20    1.60
   9   0   1  633.94   26.70
   9   0   1  696.03   24.80
  -9   0  -1  695.43   35.30
  -9   0  -1  628.24   27.40
  -9   0  -1  657.53   25.40
  -9   0  -1  645.84   27.30
  10   0   1   -0.70    0.60
 -10   0  -1   -0.60    1.30
  10   0   1   -0.40    0.60
 -10   0  -1    0.80    1.40
 -10   0  -1    0.00    0.40
 -10   0  -1   -1.50    1.20
 -10   0  -1    3.80    2.20
 -11   0  -1  121.89    7.30
 -11   0  -1  127.89    7.20
  11   0   1  133.99    5.70
 -11   0  -1  123.89    7.20
  11   0   1  117.49    6.10
  12   0   1    0.10    0.50
 -12   0  -1   -0.60    1.30
  12   0   1    1.00    0.90
 -12   0  -1   -0.10    1.70
  12   0   1   -0.30    0.70
  13   0   1  281.67   13.20
 -13   0  -1  303.77    9.90
 -14   0  -1    0.60    0.60
 -14   0  -1    0.60    0.60
 -15   0  -1  105.39    3.80
 -15   0  -1  101.29    3.90
 -16   0  -1   -0.30    0.60
 -16   0  -1    1.40    0.60
 -17   0  -1   95.59    3.50
 -17   0  -1   95.19    3.60
 -18   0  -1   -0.60    0.50
 -18   0  -1   -0.80    0.50
 -19   0  -1    8.40    0.90
 -20   0  -1   -0.20    0.40
 -20  -1   1    0.40    0.40
 -20   1   1    0.00    0.40
 -20   1   1    0.50    0.40
 -19  -1   1   28.40    1.40
 -19  -1   1   27.50    1.40
 -19   1   1   29.10    1.40
 -19   1   1   27.50    1.40
 -18  -1   1  178.58    6.00
 -18  -1   1  170.78    5.90
 -18   1   1  176.68    6.00
 -18   1   1  166.58    5.90
 -17  -1   1   20.20    1.40
 -17  -1   1   20.60    1.40
 -17   1   1   21.80    1.40
 -17   1   1   22.60    1.40
 -16  -1   1   49.60    2.10
 -16  -1   1   43.60    2.10
 -16   1   1   47.10    2.10
 -16   1   1   45.50    2.20
 -15  -1   1   37.20    1.90
 -15  -1   1   39.40    1.90
 -15   1   1   40.20    2.00
 -15   1   1   42.00    1.90
 -14  -1   1  113.19    4.30
 -14   1   1  122.19    4.20
 -14   1   1  115.59    4.30
  13  -1  -1  114.89    6.00
 -13  -1   1  113.79    4.00
 -13   1   1  114.39    4.00
 -13   1   1  103.19    6.70
  13   1  -1   82.59    5.90
  12  -1  -1  428.36   15.30
  12  -1  -1  432.26   17.90
  12   1  -1  431.96   15.60
  12   1  -1  369.56   18.10
 -12   1   1  425.96   19.30
  11  -1  -1  158.78    7.50
  11  -1  -1  155.18    6.00
  11  -1  -1  156.08    6.00
 -11  -1   1  166.38   11.00
  11  -1  -1  165.68    7.00
 -11  -1   1  155.28    6.20
 -11   1   1  151.58    9.20
 -11   1   1  151.28    8.30
  11   1  -1  166.68    6.40
 -11   1   1  178.28   11.00
  11   1  -1  146.69    7.70
 -11   1   1  153.68    8.60
  10  -1  -1   13.50    1.50
 -10  -1   1   14.50    3.00
  10  -1  -1   12.50    1.60
 -10  -1   1   13.20    1.20
 -10  -1   1   14.60    1.30
  10   1  -1   15.50    1.90
  10   1  -1   13.90    1.20
 -10   1   1   11.90    2.70
 -10   1   1   15.00    3.00
 -10   1   1   21.20    2.80
 -10   1   1   12.80    2.40
   9  -1  -1  125.29    5.90
   9  -1  -1  140.69    5.60
  -9  -1   1  129.29    6.70
  -9  -1   1  135.69    8.90
  -9  -1   1  129.59    5.40
  -9   1   1  131.79    6.80
   9   1  -1  129.49    5.80
   9   1  -1  130.29    6.30
  -9   1   1  137.59    8.80
   9   1  -1  128.69    5.10
  -9   1   1  115.09    6.60
  -9   1   1  129.19    6.90
  -9   1   1  129.39    7.60
   9   1  -1  130.79    5.10
   8  -1  -1   59.89    2.90
  -8  -1   1   69.59    4.00
  -8  -1   1   61.09    5.20
  -8  -1   1   62.99    3.00
  -8   1   1   66.49    4.10
   8   1  -1   65.09    2.70
   8   1  -1   58.79    3.10
   8   1  -1   63.29    3.60
  -8   1   1   61.29    5.10
  -8   1   1   64.39    3.50
  -8   1   1   67.59    4.20
  -8   1   1   51.29    4.50
  -8   1   1   60.19    4.00
   8   1  -1   63.99    2.60
  -7  -1   1   29.90    2.60
   7  -1  -1   28.10    1.50
  -7  -1   1   26.00    1.70
  -7  -1   1   25.90    3.20
  -7  -1   1   27.20    2.30
  -7   1   1   28.60    2.50
   7   1  -1   29.70    2.00
  -7   1   1   27.80    2.50
  -7   1   1   22.40    2.90
   7   1  -1   30.10    1.40
  -7   1   1   28.20    1.40
   7   1  -1   28.80    1.80
  -7   1   1   28.20    3.10
   7   1  -1   27.20    1.30
  -7   1   1   29.10    1.40
  -7   1   1   32.30    2.20
  -7   1   1   25.40    2.50
  -6  -1   1  392.96   14.40
  -6  -1   1  345.77   19.60
   6  -1  -1  370.56   13.90
  -6  -1   1  324.87   15.50
  -6  -1   1  405.86   15.10
  -6  -1   1  364.46   13.00
  -6  -1   1  390.36   14.00
   6  -1  -1  377.76   13.90
  -6  -1   1  368.86   15.10
  -6   1   1  374.86   14.90
  -6   1   1  380.76   13.70
   6   1  -1  375.96   15.30
   6   1  -1  384.86   14.10
  -6   1   1  377.46   13.40
   6   1  -1  368.96   18.80
   6   1  -1  381.86   13.20
   6   1  -1  354.06   13.10
  -6   1   1  375.66   14.40
  -6   1   1  359.66   15.30
  -6   1   1  351.66   19.60
  -6   1   1  370.26   15.50
  -5  -1   1 1597.44   64.59
  -5  -1   1 1694.33   59.69
  -5  -1   1 1627.14   62.39
   5  -1  -1 1781.42   60.99
  -5  -1   1 1571.64   83.19
   5  -1  -1 1756.22   61.09
  -5   1   1 1672.53   56.59
  -5   1   1 1588.84   83.09
  -5   1   1 1662.33   59.69
   5   1  -1 1663.33   81.69
  -5   1   1 1629.84   64.79
  -5   1   1 1626.14   60.29
  -5   1   1 1619.84   62.39
  -5   1   1 1667.23   63.69
   5   1  -1 1730.33   58.39
   5   1  -1 1678.03   65.89
   5   1  -1 1667.63   58.39
   5   1  -1 1793.92   61.29
   4  -1  -1 2138.49   75.49
  -4  -1   1 1995.70   79.69
  -4  -1   1 2119.29  100.69
  -4  -1   1 2023.80  100.69
  -4  -1   1 2135.69   76.99
   4  -1  -1 2075.29  100.69
   4  -1  -1 2140.49   75.49
  -4  -1   1 1927.91  102.59
  -4   1   1 2001.70  102.49
   4   1  -1 2073.59   72.39
  -4   1   1 1975.60   79.89
  -4   1   1 2022.00   78.29
  -4   1   1 2148.39   73.59
   4   1  -1 2147.89   72.39
  -4   1   1 2057.79   69.79
   4   1  -1 2077.49   75.69
  -4   1   1 1995.10   76.89
   4   1  -1 2077.29  100.99
   4   1  -1 2165.38   81.49
   3  -1  -1   67.99    3.60
  -3  -1   1   76.89    3.20
  -3  -1   1   66.59    3.80
   3  -1  -1   70.19    3.70
   3  -1  -1   69.99    2.80
  -3  -1   1   72.59    4.20
  -3  -1   1   68.79    3.30
   3  -1  -1   68.69    2.70
  -3  -1   1   70.49    3.80
   3   1  -1   72.09    2.60
  -3   1   1   66.39    2.90
  -3   1   1   69.49    3.50
  -3   1   1   66.09    3.30
  -3   1   1   64.49    4.00
   3   1  -1   67.79    2.90
   3   1  -1   69.69    2.70
   3   1  -1   71.69    3.90
  -2  -1   1  246.18    9.40
  -2  -1   1  253.47   10.90
   2  -1  -1  225.68    8.70
  -2  -1   1  230.48   11.70
   2  -1  -1  244.18   11.60
   2  -1  -1  229.08    8.70
   2  -1  -1  221.48   11.60
   2   1  -1  233.78   11.70
   2   1  -1  230.68    8.30
  -2   1   1  231.78    9.30
  -2   1   1  219.38   11.80
   1  -1  -1  445.66   15.20
   1  -1  -1  416.06   21.20
  -1   1   1  434.76   16.90
  -1   1   1  423.46   21.20
  -1   1   1  430.36   21.20
   0  -1  -1 1060.89   50.09
   0   1  -1  999.90   49.99
   0   1   1 1011.70   50.09
  -1  -1  -1  848.02   41.60
  -1  -1  -1  847.62   42.20
   1   1   1  879.81   29.80
  -1   1  -1  840.52   42.20
   1   1   1  831.52   41.60
   1   1   1  850.11   29.80
  -2  -1  -1    0.70    0.70
  -2  -1  -1    0.40    0.30
   2   1   1   -0.20    0.40
  -2   1  -1    0.80    0.70
   2   1   1    0.20    0.30
  -3  -1  -1  449.56   18.10
  -3  -1  -1  472.95   23.70
  -3  -1  -1  475.55   18.40
  -3   1  -1  456.95   16.10
  -3   1  -1  456.25   18.10
   3   1   1  465.25   18.40
  -3   1  -1  460.25   17.00
   3   1   1  469.35   22.90
   3   1   1  467.35   17.10
  -3   1  -1  451.15   23.60
  -4  -1  -1  459.85   17.10
  -4  -1  -1  472.75   16.10
  -4  -1  -1  472.05   19.40
  -4  -1  -1  458.45   17.10
  -4  -1  -1  491.95   18.70
  -4  -1  -1  437.96   24.00
  -4  -1  -1  467.45   18.50
  -4   1  -1  452.65   17.30
   4   1   1  460.35   23.00
   4   1   1  473.25   18.60
  -4   1  -1  459.75   16.30
  -4   1  -1  476.85   18.50
   4   1   1  477.05   17.30
  -4   1  -1  445.16   23.90
  -4   1  -1  458.85   18.70
  -5  -1  -1   34.10    2.30
  -5  -1  -1   33.90    1.70
  -5  -1  -1   30.60    3.10
  -5  -1  -1   33.80    1.90
  -5  -1  -1   35.50    2.40
  -5  -1  -1   36.40    2.90
  -5  -1  -1   33.90    2.50
  -5   1  -1   32.00    3.10
  -5   1  -1   34.00    2.40
   5   1   1   39.90    1.90
  -5   1  -1   33.10    2.10
  -5   1  -1   34.10    2.10
  -5   1  -1   32.10    2.70
   5   1   1   36.70    1.80
  -5   1  -1   39.20    2.50
  -6  -1  -1 3048.40  114.89
  -6  -1  -1 3032.90  109.39
  -6  -1  -1 3141.49  117.19
  -6  -1  -1 3109.29  107.79
  -6  -1  -1 2915.41  150.68
  -6  -1  -1 2943.61  101.99
  -6  -1  -1 2880.41  121.69
  -6   1  -1 2975.00  117.19
  -6   1  -1 2884.31  150.58
  -6   1  -1 3111.49  107.89
   6   1   1 3076.89  119.19
  -6   1  -1 3108.59  102.39
  -6   1  -1 3184.18  114.89
   6   1   1 3009.90  110.79
  -7  -1  -1  256.57   10.30
  -7  -1  -1  249.18    9.50
  -7  -1  -1  256.37   11.40
  -7  -1  -1  266.97   11.10
  -7  -1  -1  237.18    9.40
  -7  -1  -1  241.78   14.20
   7  -1   1  232.98    9.30
  -7   1  -1  257.27   11.20
  -7   1  -1  249.48   14.20
   7   1   1  256.97   10.50
  -7   1  -1  258.37    9.60
   7   1   1  231.58    9.60
  -7   1  -1  246.78   10.40
  -7   1  -1  257.17   11.40
  -8  -1  -1  988.00   36.80
   8  -1   1  959.60   39.30
  -8  -1  -1 1031.60   39.80
  -8  -1  -1  974.30   36.00
  -8  -1  -1 1040.50   51.39
   8  -1   1  988.30   36.50
   8   1   1 1012.40   39.70
  -8   1  -1  981.80   34.60
  -8   1  -1  994.00   39.60
  -8   1  -1  980.40   36.80
  -8   1  -1 1024.10   51.29
   8   1   1  975.20   36.90
  -8   1  -1  967.40   39.80
   9  -1   1   55.99    3.00
  -9  -1  -1   57.19    2.60
  -9  -1  -1   61.19    4.10
  -9  -1  -1   67.79    5.90
  -9  -1  -1   62.79    4.20
   9  -1   1   62.79    2.80
  -9   1  -1   71.29    5.80
  -9   1  -1   56.59    4.30
  -9   1  -1   53.69    4.00
   9   1   1   63.29    3.10
  -9   1  -1   56.89    3.60
   9   1   1   59.39    3.40
 -10  -1  -1  198.58    7.40
 -10  -1  -1  212.58   13.10
  10  -1   1  187.48    8.60
 -10  -1  -1  178.78   10.00
  10  -1   1  217.78    8.00
 -10  -1  -1  195.78    9.80
 -10  -1  -1  199.38    9.40
  10   1   1  200.18    7.50
  10   1   1  198.58    7.40
  10   1   1  206.58    8.30
  10   1   1  195.08    9.00
 -10   1  -1  198.78   10.60
 -10   1  -1  202.58    9.50
 -10   1  -1  174.48    9.90
 -10   1  -1  211.18   13.00
 -10   1  -1  200.58   10.10
 -11  -1  -1    8.50    0.90
 -11  -1  -1   10.10    2.30
  11  -1   1    8.40    1.30
  11  -1   1    8.70    1.10
 -11   1  -1   10.50    2.60
 -11   1  -1   11.60    2.30
  11   1   1    7.70    1.50
 -11   1  -1   11.40    2.50
  11   1   1    7.90    0.90
 -11   1  -1    7.30    2.50
  12  -1   1    3.30    1.00
 -12  -1  -1    2.50    0.60
  12  -1   1    2.50    1.00
 -12   1  -1    3.50    2.00
 -12   1  -1    2.30    2.10
  12   1   1    1.40    1.00
 -12   1  -1    2.50    1.80
  12   1   1    2.70    0.80
  13  -1   1    6.20    1.40
 -13  -1  -1    5.40    0.70
  13   1   1    4.10    1.50
 -13   1  -1    5.50    2.60
 -13   1  -1    8.10    0.80
 -13   1  -1    5.80    2.30
 -14  -1  -1   71.79    2.70
 -14  -1  -1   66.19    2.70
 -14   1  -1   67.09    2.70
 -14   1  -1   67.19    2.70
 -15  -1  -1    2.00    0.60
 -15  -1  -1    2.90    0.70
 -15   1  -1    2.30    0.70
 -15   1  -1    2.70    0.70
 -16  -1  -1   37.90    1.80
 -16  -1  -1   36.70    1.80
 -16   1  -1   36.40    1.70
 -16   1  -1   32.90    1.80
 -17  -1  -1   34.30    1.70
 -17   1  -1   33.20    1.60
 -17   1  -1   33.40    1.70
 -18  -1  -1    2.90    0.60
 -18   1  -1    3.20    0.60
 -18   1  -1    4.40    0.70
 -19  -1  -1    0.20    0.50
 -19   1  -1    0.20    0.50
 -19   1  -1    0.30    0.50
 -20  -1  -1   21.40    1.00
 -20   1  -1   21.90    1.00
 -20  -2   1   40.50    1.60
 -20   2   1   36.50    1.60
 -20   2   1   39.70    1.60
 -19  -2   1   -0.20    0.50
 -19   2   1    0.00    0.50
 -19   2   1    0.50    0.50
 -18  -2   1   46.80    2.00
 -18  -2   1   47.20    2.00
 -18   2   1   48.30    2.10
 -18   2   1   45.50    2.00
 -17  -2   1   47.70    2.20
 -17  -2   1   51.59    2.10
 -17   2   1   51.29    2.10
 -17   2   1   47.10    2.20
 -16  -2   1  167.48    6.00
 -16  -2   1  170.88    5.90
 -16   2   1  172.78    5.90
 -16   2   1  170.18    6.00
 -15  -2   1   15.70    1.20
 -15  -2   1   19.10    1.30
 -15   2   1   17.80    1.30
 -15   2   1   16.90    1.30
 -14  -2   1    0.00    0.50
 -14  -2   1    0.20    0.60
 -14   2   1   -1.10    0.60
 -14   2   1   -0.70    1.60
 -14   2   1   -0.10    0.60
 -13  -2   1   12.10    1.40
 -13  -2   1   10.20    1.10
  13  -2  -1   12.60    1.90
 -13   2   1   10.90    1.00
 -13   2   1   10.70    2.30
  12  -2  -1  134.79    5.30
  12  -2  -1  141.89    6.30
  12  -2  -1  128.49    6.50
 -12  -2   1  137.59    5.50
  12  -2  -1  135.89    5.20
 -12   2   1  123.79    8.10
 -12   2   1  134.49    7.60
 -12   2   1  137.19    8.80
 -11  -2   1   75.19    3.40
  11  -2  -1   67.59    3.70
 -11  -2   1   72.79    3.30
 -11  -2   1   83.29    6.90
  11  -2  -1   73.39    3.90
 -11   2   1   77.39    5.30
 -11   2   1   63.69    5.20
 -11   2   1   79.39    6.60
  11   2  -1   72.29    3.50
 -11   2   1   81.29    6.20
 -11   2   1   70.19    4.80
  11   2  -1   61.79    4.40
 -10  -2   1  351.06   13.10
 -10  -2   1  363.86   13.80
 -10  -2   1  367.96   20.70
  10  -2  -1  359.56   14.00
  10  -2  -1  370.96   15.10
  10   2  -1  362.56   13.30
 -10   2   1  343.17   16.50
 -10   2   1  342.07   14.20
 -10   2   1  349.27   16.10
 -10   2   1  398.06   20.60
 -10   2   1  340.17   15.10
  10   2  -1  350.06   15.60
  -9  -2   1  325.67   17.30
   9  -2  -1  297.47   11.50
  -9  -2   1  288.77   11.50
  -9   2   1  291.07   13.30
  -9   2   1  294.97   11.60
  -9   2   1  282.07   16.60
  -9   2   1  257.87   13.50
   9   2  -1  293.57   12.90
  -9   2   1  283.97   12.50
   9   2  -1  306.07   10.90
   8  -2  -1  194.38    7.80
  -8  -2   1  199.78   11.90
  -8  -2   1  204.78    8.90
  -8  -2   1  195.58    8.00
   8  -2  -1  191.68    7.80
  -8   2   1  199.78    9.00
  -8   2   1  219.88    8.30
   8   2  -1  197.88    8.90
   8   2  -1  199.48    7.50
  -8   2   1  192.28   11.70
   8   2  -1  181.58    8.10
   8   2  -1  189.68    7.70
  -8   2   1  195.08    8.90
  -8   2   1  200.88    9.80
  -8   2   1  200.58    9.40
  -7  -2   1  453.25   24.80
  -7  -2   1  472.45   17.60
  -7  -2   1  475.55   18.90
   7  -2  -1  472.35   17.40
   7  -2  -1  460.95   17.40
  -7   2   1  441.06   24.50
   7   2  -1  483.75   16.90
  -7   2   1  468.35   19.40
  -7   2   1  495.85   17.00
   7   2  -1  479.45   19.30
  -7   2   1  464.95   19.50
  -7   2   1  472.65   18.60
   7   2  -1  438.86   17.80
  -7   2   1  445.36   18.00
   7   2  -1  457.55   16.70
   6  -2  -1    5.10    0.70
  -6  -2   1    8.20    1.30
  -6  -2   1    7.20    1.30
   6  -2  -1    5.10    0.70
  -6  -2   1   11.30    1.10
  -6  -2   1    5.20    1.70
  -6   2   1    6.50    0.60
  -6   2   1    4.90    1.20
  -6   2   1    5.10    1.50
   6   2  -1    5.50    0.90
  -6   2   1    5.80    1.40
   6   2  -1    5.60    0.70
  -6   2   1    4.60    1.40
  -6   2   1    8.40    1.80
   6   2  -1    5.90    0.80
  -6   2   1    7.70    1.60
   6   2  -1    5.70    1.10
  -5  -2   1  212.58   10.50
   5  -2  -1  210.98    7.90
  -5  -2   1  185.18    8.10
  -5  -2   1  209.28    8.60
   5  -2  -1  211.68    7.80
  -5  -2   1  233.98   10.60
  -5  -2   1  190.48    9.10
  -5  -2   1  194.68   11.50
   5   2  -1  203.68    7.70
  -5   2   1  197.88   11.30
  -5   2   1  203.28    8.70
   5   2  -1  209.58    8.20
  -5   2   1  220.48    8.00
  -5   2   1  215.18    9.10
   5   2  -1  209.48   10.90
  -5   2   1  214.88    9.20
  -5   2   1  212.28    8.50
   5   2  -1  197.58    8.90
   5   2  -1  205.48    7.60
  -5   2   1  199.38    7.80
   4  -2  -1  410.16   14.70
  -4  -2   1  393.16   19.80
   4  -2  -1  401.06   14.60
  -4  -2   1  386.76   16.50
   4  -2  -1  403.16   19.60
  -4   2   1  367.56   20.30
  -4   2   1  400.16   14.60
  -4   2   1  405.06   15.50
   4   2  -1  392.16   19.90
  -4   2   1  400.36   14.90
  -4   2   1  407.76   14.10
  -4   2   1  399.56   16.10
   4   2  -1  403.56   14.10
   4   2  -1  386.96   16.10
  -4   2   1  390.96   15.90
   4   2  -1  369.16   14.20
   3  -2  -1  687.63   34.10
   3  -2  -1  693.73   25.50
   3  -2  -1  691.23   34.10
  -3  -2   1  671.43   34.20
   3  -2  -1  687.63   25.60
  -3  -2   1  720.63   27.40
  -3   2   1  705.93   26.80
  -3   2   1  690.83   23.90
  -3   2   1  682.53   34.70
  -3   2   1  668.33   27.40
  -3   2   1  661.23   26.20
   3   2  -1  719.63   34.30
   3   2  -1  710.93   24.50
  -3   2   1  704.03   25.10
   2  -2  -1   26.30    1.30
   2  -2  -1   24.10    1.70
   2  -2  -1   24.60    1.70
   2  -2  -1   24.20    1.30
  -2  -2   1   25.70    1.60
  -2   2   1   26.70    1.40
  -2   2   1   25.80    1.40
  -2   2   1   23.80    1.50
  -2   2   1   22.50    1.90
   2   2  -1   24.70    1.90
  -2   2   1   25.10    1.50
  -2   2   1   24.40    1.50
   1  -2  -1   61.99    2.20
   1  -2  -1   55.69    3.20
   1  -2  -1   56.09    3.20
   1  -2  -1   53.89    2.20
  -1  -2   1   51.99    3.20
  -1   2   1   54.09    3.20
  -1   2   1   59.69    2.70
  -1   2   1   60.29    3.00
  -1   2   1   54.49    3.20
   1   2  -1   54.69    3.20
   0  -2   1  926.61   46.20
   0  -2  -1  930.81   46.20
   0  -2  -1  913.31   46.30
   0  -2   1  919.01   33.10
   0  -2   1  981.30   33.10
   0   2  -1  936.71   42.60
   0   2   1  954.80   46.20
   0   2  -1  986.30   42.50
   0   2  -1  928.11   46.10
   1  -2   1   74.89    3.80
   1  -2   1   73.09    2.90
   1  -2   1   72.49    3.80
   1   2   1   73.09    4.10
  -2  -2  -1  195.88   10.60
  -2   2  -1  209.78    8.70
   2   2   1  216.88    7.50
  -2   2  -1  211.78    8.60
   2   2   1  207.98   10.70
   2   2   1  197.98    7.50
  -2   2  -1  201.98    7.50
  -3  -2  -1 1094.59   53.79
  -3  -2  -1 1119.59   42.80
  -3  -2  -1 1108.19   44.60
  -3  -2  -1 1060.69   54.99
   3   2   1 1081.99   53.89
  -3   2  -1 1114.09   37.50
  -3   2  -1 1055.49   54.89
   3   2   1 1144.69   43.60
  -3   2  -1 1091.19   42.90
   3   2   1 1126.09   38.60
   3   2   1 1103.49   38.60
  -3   2  -1 1083.59   39.40
  -4  -2  -1   76.19    3.40
  -4  -2  -1   72.39    5.20
  -4  -2  -1   79.19    4.20
  -4  -2  -1   77.99    3.90
  -4  -2  -1   78.89    3.60
   4   2   1   79.29    3.00
   4   2   1   73.39    4.50
   4   2   1   83.29    3.70
  -4   2  -1   78.49    5.20
   4   2   1   77.19    3.40
  -4   2  -1   74.19    3.80
  -4   2  -1   77.69    3.60
   4   2   1   77.09    3.00
  -4   2  -1   73.39    4.10
  -4   2  -1   72.29    4.10
  -5  -2  -1    2.70    0.80
  -5  -2  -1    2.30    1.10
  -5  -2  -1    3.30    1.10
  -5  -2  -1    2.40    1.00
  -5  -2  -1    2.70    0.60
  -5  -2  -1    1.30    1.30
  -5   2  -1    4.80    1.50
   5   2   1    2.90    0.40
  -5   2  -1    3.50    1.20
  -5   2  -1    4.80    1.20
  -5   2  -1    2.00    0.80
  -5   2  -1    4.50    1.00
  -5   2  -1    3.00    1.30
   5   2   1    3.90    0.80
   5   2   1    2.20    0.90
   5   2   1    3.30    0.70
   5   2   1    2.70    0.40
  -6  -2  -1    8.70    1.70
  -6  -2  -1    9.20    1.10
  -6  -2  -1    9.90    1.50
  -6  -2  -1    7.40    1.40
  -6  -2  -1    9.40    2.00
   6   2   1    9.80    0.80
   6   2   1   10.70    1.20
  -6   2  -1   10.10    1.50
  -6   2  -1   10.20    2.00
  -6   2  -1   10.40    1.80
  -6   2  -1    8.20    1.70
  -6   2  -1   12.70    1.80
   6   2   1    8.80    0.70
   6   2   1    9.50    1.10
  -7  -2  -1  237.48    9.40
  -7  -2  -1  249.08   14.10
  -7  -2  -1  244.58   10.70
  -7  -2  -1  239.38   11.10
  -7  -2  -1  260.17   10.10
   7   2   1  237.08   10.30
  -7   2  -1  233.88   10.20
  -7   2  -1  236.58   10.90
   7   2   1  240.08    8.80
  -7   2  -1  248.48   11.20
  -7   2  -1  240.48    9.50
  -7   2  -1  240.58   13.90
   7   2   1  231.18    9.50
   7   2   1  242.78    8.80
  -8  -2  -1   41.40    3.20
  -8  -2  -1   42.50    2.30
  -8  -2  -1   42.00    3.20
  -8  -2  -1   43.40    4.60
   8  -2   1   40.60    1.80
   8  -2   1   45.10    1.80
  -8   2  -1   38.50    3.30
  -8   2  -1   37.30    2.90
  -8   2  -1   37.80    3.80
   8   2   1   41.60    2.00
  -8   2  -1   39.90    4.30
  -8   2  -1   40.30    3.40
   8   2   1   39.30    2.50
   8   2   1   39.20    2.70
   8   2   1   41.50    2.00
   9  -2   1   47.90    2.10
  -9  -2  -1   48.90    3.70
  -9  -2  -1   44.60    2.30
  -9  -2  -1   51.79    3.60
  -9  -2  -1   44.20    5.00
  -9  -2  -1   44.90    2.20
   9   2   1   42.10    2.90
  -9   2  -1   47.50    4.30
  -9   2  -1   40.60    3.60
   9   2   1   44.60    2.30
  -9   2  -1   43.50    4.80
  -9   2  -1   46.20    3.90
   9   2   1   47.40    2.20
  -9   2  -1   45.00    3.20
   9   2   1   43.80    2.70
  10  -2   1  283.17   12.30
 -10  -2  -1  306.37   13.60
  10  -2   1  315.87   11.50
 -10  -2  -1  297.07   10.90
 -10  -2  -1  310.67   18.10
 -10   2  -1  293.87   14.00
  10   2   1  280.27   13.10
 -10   2  -1  296.47   14.40
 -10   2  -1  321.77   17.90
 -10   2  -1  281.67   14.10
 -10   2  -1  292.47   13.10
 -10   2  -1  296.37   12.00
  10   2   1  298.37   11.10
  11  -2   1    5.60    1.00
  11  -2   1    7.90    1.00
 -11  -2  -1    8.80    1.00
 -11   2  -1    5.30    1.90
 -11   2  -1    8.10    2.80
  11   2   1    8.90    1.10
 -11   2  -1    7.00    2.30
 -11   2  -1    9.10    2.60
  11   2   1    3.60    1.30
  12  -2   1   29.90    2.30
 -12  -2  -1   29.50    1.80
  12  -2   1   29.10    2.10
 -12   2  -1   30.30    4.20
 -12   2  -1   30.00    4.00
  12   2   1   31.70    2.10
  12   2   1   26.70    2.80
 -12   2  -1   32.70    3.50
 -12   2  -1   33.10    4.70
 -13  -2  -1    1.00    0.60
  13  -2   1    0.80    0.90
 -13   2  -1   -0.30    2.00
 -13   2  -1    0.90    1.80
 -13   2  -1    2.10    0.60
 -14  -2  -1   88.69    3.20
 -14   2  -1   83.69    3.20
 -14   2  -1   80.29    3.20
 -14   2  -1   77.39    6.00
 -15  -2  -1   25.20    1.40
 -15   2  -1   23.80    1.40
 -15   2  -1   22.80    1.50
 -16  -2  -1   15.00    1.20
 -16   2  -1   13.40    1.20
 -16   2  -1   17.40    1.20
 -17  -2  -1   11.60    1.10
 -17   2  -1   11.30    1.10
 -17   2  -1   10.70    1.10
 -18  -2  -1    6.50    0.70
 -18   2  -1    5.90    0.80
 -18   2  -1    5.50    0.70
 -19  -2  -1    4.60    0.60
 -19   2  -1    5.60    0.60
 -19   2  -1    4.90    0.60
 -20  -2  -1   18.80    0.90
 -20   2  -1   18.70    1.00
 -20  -3   1    0.60    0.40
 -20   3   1    1.60    0.50
 -20   3   1    0.80    0.40
 -19  -3   1    4.90    0.60
 -19   3   1    6.70    0.70
 -19   3   1    4.60    0.60
 -18  -3   1    0.00    0.50
 -18   3   1    0.30    0.60
 -18   3   1    0.00    0.50
 -17  -3   1   64.79    2.50
 -17   3   1   65.79    2.50
 -17   3   1   60.59    2.60
 -16  -3   1    8.50    0.80
 -16  -3   1    9.10    0.90
 -16   3   1    8.40    0.90
 -16   3   1    9.80    0.90
 -15  -3   1   62.39    2.50
 -15  -3   1   58.99    2.50
 -15   3   1   60.79    2.50
 -15   3   1   59.59    2.60
 -15   3   1   64.49    5.20
 -14  -3   1  257.57    8.80
 -14  -3   1  265.87    8.90
 -14  -3   1  256.97    9.00
 -14   3   1  275.27    9.00
 -14   3   1  268.17    8.90
 -14   3   1  282.07   13.60
 -13  -3   1   72.69    3.60
 -13  -3   1   67.29    2.60
  13  -3  -1   73.99    4.10
  13  -3  -1   71.79    4.20
 -13  -3   1   72.19    2.80
 -13   3   1   77.19    2.90
 -13   3   1   74.99    5.30
 -13   3   1   67.09    6.20
 -13   3   1   74.19    6.70
  12  -3  -1   52.99    2.30
 -12  -3   1   49.99    2.70
 -12  -3   1   53.19    2.70
  12  -3  -1   50.39    2.30
  12  -3  -1   47.60    3.00
  12  -3  -1   56.39    3.30
 -12   3   1   55.99    5.70
 -12   3   1   47.70    5.00
 -12   3   1   46.30    4.10
  11  -3  -1  122.19    6.00
 -11  -3   1  133.09    5.70
 -11  -3   1  131.19    5.30
  11  -3  -1  119.79    5.60
 -11   3   1  128.09    7.80
 -11   3   1  116.09    7.10
 -11   3   1  122.69    7.10
 -11   3   1  127.79    8.20
  10  -3  -1    3.30    0.90
 -10  -3   1    3.00    0.80
 -10  -3   1    3.50    0.60
 -10  -3   1    3.50    1.00
 -10  -3   1    6.10    2.40
 -10   3   1    1.60    1.90
 -10   3   1    2.10    1.70
 -10   3   1    3.40    1.70
 -10   3   1    5.50    1.70
 -10   3   1    3.90    2.00
  -9  -3   1  103.39    4.60
  -9  -3   1  110.09    5.20
   9  -3  -1  116.09    4.80
  -9  -3   1  114.59    8.10
   9  -3  -1  120.09    4.90
  -9   3   1  102.99    5.50
  -9   3   1   98.49    6.70
   9   3  -1  113.49    4.70
  -9   3   1   99.69    5.90
  -9   3   1  111.99    6.60
  -9   3   1  110.39    7.70
   8  -3  -1    1.40    0.60
  -8  -3   1    2.20    1.80
  -8  -3   1    3.00    0.90
   8  -3  -1    2.20    0.60
  -8   3   1   10.50    2.20
  -8   3   1    0.80    1.30
   8   3  -1    1.90    0.70
   8   3  -1    3.20    1.20
  -8   3   1    3.40    1.70
  -8   3   1    2.90    1.40
  -8   3   1    1.10    1.80
  -7  -3   1  174.18    7.40
   7  -3  -1  181.28    7.00
  -7  -3   1  168.78    8.40
   7  -3  -1  168.68    7.00
  -7  -3   1  184.88   10.90
  -7   3   1  171.88    8.70
   7   3  -1  169.28    6.80
  -7   3   1  184.58    8.00
  -7   3   1  179.18   10.50
   7   3  -1  182.88    8.20
  -7   3   1  179.28    8.60
  -7   3   1  194.18    7.60
  -7   3   1  177.08    8.10
  -6  -3   1   65.09    3.50
  -6  -3   1   73.99    4.20
  -6  -3   1   69.09    5.30
   6  -3  -1   72.79    3.10
  -6  -3   1   76.49    4.20
  -6  -3   1   72.19    4.20
  -6  -3   1   80.89    3.80
   6   3  -1   78.09    4.00
  -6   3   1   68.59    4.50
   6   3  -1   74.59    3.20
  -6   3   1   75.09    4.10
  -6   3   1   77.49    4.50
  -6   3   1   67.79    4.00
  -6   3   1   66.69    5.00
  -6   3   1   76.79    3.80
   5  -3  -1  258.77    9.60
  -5  -3   1  241.78   10.30
  -5  -3   1  229.48   13.70
   5  -3  -1  253.47    9.50
  -5  -3   1  260.17   13.00
  -5  -3   1  239.18   11.10
  -5   3   1  260.57   10.10
  -5   3   1  253.17   10.40
   5   3  -1  237.48   10.70
   5   3  -1  227.18    9.40
   5   3  -1  257.47    9.90
   5   3  -1  248.78   13.20
   5   3  -1  254.27    9.30
  -5   3   1  262.47   10.90
  -5   3   1  237.98   13.40
  -5   3   1  248.08    9.30
  -5   3   1  259.97    9.50
  -5   3   1  260.07   11.10
   4  -3  -1 5288.67  258.37
  -4  -3   1 5236.48  212.38
   4  -3  -1 5420.06  193.68
   4  -3  -1 5428.36  193.68
  -4  -3   1 5372.46  203.78
  -4  -3   1 5222.98  258.57
  -4   3   1 5302.47  204.48
  -4   3   1 5455.85  199.58
  -4   3   1 5204.58  191.28
  -4   3   1 5387.56  178.48
  -4   3   1 5463.35  187.78
   4   3  -1 5359.86  258.77
   4   3  -1 4690.33  208.78
  -4   3   1 5380.06  196.18
   4   3  -1 5447.95  185.78
   3  -3  -1  367.36   18.80
   3  -3  -1  403.86   14.20
  -3  -3   1  377.96   15.30
  -3  -3   1  367.46   15.90
  -3  -3   1  358.66   19.00
   3  -3  -1  369.96   14.10
  -3   3   1  366.66   15.60
  -3   3   1  368.76   13.40
   3   3  -1  367.26   19.10
   3   3  -1  381.86   13.60
  -3   3   1  372.46   14.00
  -3   3   1  388.96   15.20
   2  -3  -1 7455.35  259.97
  -2  -3   1 7789.22  288.07
  -2  -3   1 7534.45  296.67
   2  -3  -1 7535.15  362.26
  -2  -3   1 7100.69  362.46
   2  -3  -1 7163.88  361.36
   2  -3  -1 7369.26  259.87
   2  -3  -1 7497.55  271.37
  -2   3   1 7442.46  361.66
  -2   3   1 7095.09  287.67
  -2   3   1 7426.46  278.27
  -2   3   1 7742.83  333.27
  -2   3   1 7640.44  287.67
  -2   3   1 7373.36  249.08
  -2   3   1 7156.28  361.56
  -2   3   1 7886.21  333.37
   2   3  -1 7118.59  361.96
   1  -3  -1   55.39    3.40
  -1  -3   1   55.19    3.20
  -1  -3   1   54.89    3.40
   1  -3  -1   60.49    2.30
   1  -3  -1   55.69    3.50
   1  -3  -1   54.29    2.30
  -1   3   1   57.69    3.10
   1   3  -1   54.19    3.40
  -1   3   1   54.19    3.30
  -1   3   1   61.39    2.90
  -1   3   1   57.59    3.00
  -1   3   1   52.59    3.30
   1   3  -1   56.89    3.30
   1   3  -1   56.29    3.30
  -1   3   1   59.79    3.20
   0  -3   1  699.33   24.10
   0  -3   1  627.04   24.10
   0  -3  -1  687.13   33.80
   0  -3   1  683.63   33.70
   0   3   1  698.23   27.00
   0   3  -1  672.93   33.60
   0   3  -1  712.23   31.20
   0   3  -1  730.33   31.10
   0   3   1  692.23   33.80
   0   3  -1  630.44   33.60
  -1  -3  -1  308.07   16.40
  -1  -3  -1  348.47   13.80
   1  -3   1  309.97   16.20
   1  -3   1  336.67   12.20
   1   3   1  303.87   16.50
  -1   3  -1  326.17   11.50
  -1   3  -1  328.07   13.00
   1   3   1  328.07   16.50
  -1   3  -1  340.57   12.90
  -1   3  -1  319.77   12.90
   2  -3   1  224.48   11.40
  -2  -3  -1  235.28   10.00
  -2  -3  -1  215.38   11.80
   2  -3   1  224.48    8.50
   2   3   1  229.68   11.80
  -2   3  -1  225.88    8.40
  -2   3  -1  223.48    8.80
   2   3   1  225.18    8.30
  -2   3  -1  232.08    9.70
  -2   3  -1  231.08    9.50
  -3  -3  -1  120.89    5.70
  -3  -3  -1  110.59    6.30
   3  -3   1  112.29    5.40
  -3   3  -1  118.79    5.50
   3   3   1  106.79    4.50
   3   3   1  122.09    4.90
  -3   3  -1  124.29    5.60
   3   3   1  119.29    4.40
   3   3   1   99.59    5.20
  -3   3  -1  114.19    4.70
   3   3   1  108.99    6.40
  -3   3  -1  114.09    5.00
   4  -3   1 3464.85  137.09
  -4  -3  -1 3490.35  137.39
  -4  -3  -1 3532.15  166.78
  -4  -3  -1 3081.09  169.58
  -4  -3  -1 3407.56  131.79
   4   3   1 3541.45  119.89
   4   3   1 3602.84  125.29
   4   3   1 3234.78  119.89
  -4   3  -1 3449.85  121.39
  -4   3  -1 3443.76  115.39
   4   3   1 3381.86  167.08
   4   3   1 3348.17  134.79
  -4   3  -1 3500.65  132.19
  -4   3  -1 3436.16  129.09
   5  -3   1  296.17   12.70
  -5  -3  -1  267.77   16.10
  -5  -3  -1  303.37   13.10
  -5  -3  -1  309.97   12.50
  -5  -3  -1  281.57   11.30
   5   3   1  302.87   11.60
  -5   3  -1  276.57   16.00
  -5   3  -1  289.27   11.70
  -5   3  -1  298.17   12.70
   5   3   1  306.17   12.50
   5   3   1  294.57   10.90
  -5   3  -1  304.07   12.70
  -5   3  -1  303.67   11.10
   5   3   1  286.87   10.80
   5   3   1  305.27   10.90
  -6  -3  -1  819.02   34.40
  -6  -3  -1  808.82   42.70
  -6  -3  -1  827.82   30.60
  -6  -3  -1  905.81   33.00
  -6   3  -1  760.92   42.30
   6   3   1  817.82   33.40
  -6   3  -1  863.41   29.10
   6   3   1  829.52   31.00
   6   3   1  803.02   29.40
  -6   3  -1  827.02   30.70
  -6   3  -1  829.92   33.30
  -6   3  -1  830.82   32.80
   6   3   1  830.92   29.50
  -7  -3  -1  211.78    9.50
  -7  -3  -1  230.38   12.90
  -7  -3  -1  211.88    8.50
  -7  -3  -1  202.58   10.00
   7   3   1  207.48    9.40
  -7   3  -1  216.88   12.60
   7   3   1  208.58    8.00
  -7   3  -1  212.58    9.20
   7   3   1  213.08    9.00
  -7   3  -1  209.08   10.10
  -7   3  -1  197.28    9.90
  -7   3  -1  211.08    8.60
  -8  -3  -1  600.54   22.10
  -8  -3  -1  568.44   25.30
  -8  -3  -1  638.04   31.80
  -8  -3  -1  586.24   24.20
  -8   3  -1  550.24   24.60
  -8   3  -1  553.44   22.70
   8   3   1  568.74   24.30
   8   3   1  606.34   21.20
  -8   3  -1  592.54   21.50
  -8   3  -1  570.14   24.50
  -8   3  -1  629.24   31.50
  -9  -3  -1  128.19    5.20
   9  -3   1  138.69    5.20
  -9  -3  -1  129.79    5.70
  -9  -3  -1  134.89    9.50
   9  -3   1  132.59    5.20
  -9  -3  -1  130.29    6.90
  -9   3  -1  114.99    6.70
   9   3   1  125.79    6.60
  -9   3  -1  127.49    7.70
  -9   3  -1  131.79    6.40
  -9   3  -1  130.29    7.40
  -9   3  -1  139.19    9.30
   9   3   1  137.59    5.40
 -10  -3  -1  187.48    7.60
 -10  -3  -1  210.08   13.40
  10  -3   1  202.58    7.90
 -10  -3  -1  211.18    8.10
 -10   3  -1  189.58    9.60
 -10   3  -1  205.08   10.90
 -10   3  -1  219.78   13.20
  10   3   1  195.98    9.60
 -10   3  -1  194.38   10.40
 -10   3  -1  193.08    8.90
 -10   3  -1  209.68   10.40
  10   3   1  200.08    8.00
 -11  -3  -1   17.50    1.40
  11  -3   1   18.30    1.40
  11  -3   1   16.10    1.40
 -11   3  -1   15.50    3.40
 -11   3  -1   18.90    2.80
 -11   3  -1   15.10    3.00
 -11   3  -1   16.30    3.00
 -11   3  -1   13.90    2.50
  12  -3   1   39.70    2.30
 -12  -3  -1   39.20    2.20
  12  -3   1   32.10    2.30
 -12   3  -1   31.50    4.50
 -12   3  -1   42.40    3.90
 -12   3  -1   32.00    4.20
 -12   3  -1   34.50    5.00
 -12   3  -1   38.80    1.80
 -13  -3  -1   30.00    1.90
 -13   3  -1   24.50    4.20
 -13   3  -1   23.60    3.90
 -13   3  -1   34.40    5.30
 -13   3  -1   27.10    3.50
 -13   3  -1   27.70    1.50
 -14  -3  -1  237.58    7.70
 -14  -3  -1  234.18    8.70
 -14   3  -1  235.88    7.80
 -14   3  -1  193.68   11.70
 -14   3  -1  221.78    7.70
 -15  -3  -1    9.00    0.90
 -15   3  -1    5.70    2.50
 -15   3  -1    9.60    0.90
 -15   3  -1   11.20    1.10
 -16  -3  -1    9.00    0.90
 -16   3  -1    7.70    0.80
 -16   3  -1    8.10    0.90
 -17  -3  -1   18.20    1.20
 -17   3  -1   18.80    1.20
 -17   3  -1   20.20    1.40
 -18  -3  -1   19.00    1.20
 -18   3  -1   18.70    1.20
 -18   3  -1   20.50    1.30
 -19  -3  -1    0.10    0.40
 -19   3  -1    0.80    0.50
 -19   3  -1   -0.30    0.40
 -20  -3  -1   70.39    2.50
 -20  -4   1    4.40    0.50
 -19  -4   1   20.20    1.10
 -19   4   1   20.80    1.20
 -19   4   1   23.60    1.30
 -18  -4   1    9.40    1.00
 -18   4   1    9.80    0.80
 -18   4   1   12.30    1.10
 -17  -4   1    9.70    0.90
 -17  -4   1   10.80    1.00
 -17   4   1    8.50    0.80
 -17   4   1    9.20    0.90
 -16  -4   1   58.89    2.40
 -16  -4   1   59.99    2.40
 -16   4   1   60.39    2.50
 -16   4   1   59.79    2.50
 -15  -4   1    0.40    0.60
 -15  -4   1   -0.60    0.50
 -15   4   1    0.30    0.70
 -15   4   1   -0.30    1.80
 -15   4   1   -0.30    0.60
 -14  -4   1   65.69    3.30
 -14  -4   1   56.89    2.30
 -14  -4   1   59.59    2.40
 -14   4   1   58.79    2.50
 -14   4   1   62.19    2.40
 -14   4   1   55.09    4.80
  13  -4  -1    0.70    1.00
 -13  -4   1    2.60    0.50
 -13  -4   1    2.10    1.00
 -13   4   1    0.70    0.60
 -13   4   1    2.60    1.80
 -13   4   1    2.10    2.50
 -13   4   1    2.80    2.60
 -12  -4   1    4.10    1.20
 -12  -4   1    4.10    1.00
  12  -4  -1    4.80    1.10
  12  -4  -1    3.60    1.20
 -12   4   1    4.70    2.50
 -12   4   1    0.00    2.10
 -12   4   1    6.70    2.50
 -12   4   1    3.00    1.70
 -11  -4   1   25.60    1.40
 -11  -4   1   27.00    1.90
  11  -4  -1   29.10    2.10
 -11  -4   1   23.60    1.40
 -11  -4   1   25.20    2.30
 -11   4   1   25.90    4.00
 -11   4   1   31.00    3.10
 -11   4   1   21.40    3.30
 -11   4   1   30.10    4.50
  10  -4  -1   55.99    3.00
 -10  -4   1   56.29    2.60
 -10  -4   1   62.99    3.50
  10  -4  -1   59.29    3.00
 -10  -4   1   54.89    5.70
 -10  -4   1   54.49    2.90
 -10   4   1   54.29    4.10
 -10   4   1   53.99    4.40
 -10   4   1   60.29    5.00
 -10   4   1   56.39    5.10
 -10   4   1   57.59    4.00
   9  -4  -1  176.28    7.20
   9  -4  -1  181.28    7.20
  -9  -4   1  186.08    7.80
  -9  -4   1  188.78   11.80
  -9  -4   1  161.68    6.80
  -9   4   1  173.98    9.50
  -9   4   1  169.18    8.50
  -9   4   1  167.18    7.90
  -9   4   1  174.28    9.30
  -8  -4   1  365.66   14.60
  -8  -4   1  411.06   20.90
   8  -4  -1  364.26   14.10
   8  -4  -1  363.86   14.00
  -8   4   1  353.46   16.30
  -8   4   1  373.46   14.20
  -8   4   1  353.46   16.40
  -8   4   1  352.16   14.90
   7  -4  -1   16.20    1.30
   7  -4  -1   15.60    1.30
  -7  -4   1   21.20    3.30
  -7  -4   1   16.80    2.40
  -7   4   1   17.90    2.30
  -7   4   1   18.90    2.70
  -7   4   1   15.20    2.50
  -7   4   1   16.50    2.10
   6  -4  -1    1.80    0.50
  -6  -4   1    0.20    1.10
   6  -4  -1    0.90    0.50
  -6  -4   1    0.80    1.40
  -6  -4   1    2.00    1.00
  -6   4   1    0.70    1.20
  -6   4   1    2.70    1.20
  -6   4   1    1.00    1.20
  -6   4   1    1.10    1.30
  -6   4   1    2.20    0.40
  -6   4   1    0.70    1.40
  -5  -4   1 1481.65   57.89
   5  -4  -1 1469.95   54.79
  -5  -4   1 1479.95   73.59
  -5  -4   1 1437.86   60.79
   5  -4  -1 1547.15   54.99
   5   4  -1 1516.45   52.79
  -5   4   1 1557.44   53.89
  -5   4   1 1505.25   51.29
  -5   4   1 1541.95   57.49
  -5   4   1 1446.66   58.89
  -5   4   1 1467.05   56.09
  -5   4   1 1478.15   54.09
  -4  -4   1 2262.17   89.79
  -4  -4   1 2210.88   85.69
   4  -4  -1 2236.18   81.39
   4  -4  -1 2304.27   81.49
   4  -4  -1 2106.29  108.59
  -4  -4   1 2119.99  108.89
  -4   4   1 2236.58   75.49
   4   4  -1 2215.38  109.09
  -4   4   1 2196.38   80.39
  -4   4   1 2223.28   79.19
  -4   4   1 2281.67   86.69
  -4   4   1 2187.28   82.69
   4   4  -1 2248.28   78.19
  -4   4   1 2300.47   84.49
  -3  -4   1  988.30   40.90
   3  -4  -1  992.60   35.10
   3  -4  -1  953.70   49.30
   3  -4  -1  988.10   35.10
   3  -4  -1  989.40   36.90
  -3   4   1  985.00   36.00
  -3   4   1 1034.70   38.90
  -3   4   1 1014.90   34.50
  -3   4   1 1074.79   38.60
  -3   4   1 1000.00   38.90
   3   4  -1  997.10   49.50
  -3   4   1  984.30   36.50
   2  -4  -1  273.47   11.20
  -2  -4   1  262.17   11.10
  -2  -4   1  238.48   13.60
   2  -4  -1  257.37   13.50
   2  -4  -1  266.47    9.50
  -2  -4   1  265.97   11.60
   2  -4  -1  241.38   10.10
   2  -4  -1  256.77    9.50
  -2   4   1  280.57   10.90
  -2   4   1  261.07   10.70
  -2   4   1  269.27   13.20
  -2   4   1  258.47    9.70
  -2   4   1  270.57   13.20
  -2   4   1  270.87   12.10
   2   4  -1  246.08   13.60
  -2   4   1  274.97   12.20
  -2   4   1  260.67   10.70
   1  -4  -1    6.50    0.80
  -1  -4   1    6.40    1.50
   1  -4  -1    7.40    1.00
   1  -4  -1    7.00    1.30
   1  -4  -1    6.40    1.30
   1  -4  -1    6.30    0.80
  -1  -4   1    6.00    0.80
  -1  -4   1    5.20    1.20
   1  -4  -1    8.80    1.40
   1   4  -1    6.80    1.40
  -1   4   1    8.40    1.30
   1   4  -1    6.30    1.30
  -1   4   1    7.80    1.50
  -1   4   1    5.90    1.20
   1   4  -1    4.70    1.20
  -1   4   1    7.80    1.20
  -1   4   1    6.80    1.20
  -1   4   1    8.70    1.40
   0  -4   1  209.68   11.40
   0  -4   1  215.18    8.50
   0  -4  -1  223.38    9.60
   0  -4  -1  228.88    8.20
   0  -4  -1  211.08   11.50
   0  -4   1  203.78    8.10
   0  -4   1  232.98    9.80
   0  -4   1  227.28    8.10
   0   4   1  216.78   11.40
   0   4  -1  210.28    7.90
   0   4   1  226.88    9.40
   0   4  -1  236.98   10.50
   0   4  -1  223.98   10.60
   0   4  -1  217.28   11.30
   0   4  -1  203.58   11.30
   0   4  -1  212.88    9.20
  -1  -4  -1    1.10    0.90
  -1  -4  -1    1.30    1.00
   1  -4   1    1.50    0.40
   1  -4   1    0.40    0.50
   1  -4   1    0.90    0.40
   1  -4   1    6.50    1.40
  -1   4  -1    0.50    0.90
  -1   4  -1    0.30    1.10
  -1   4  -1    0.90    1.30
   1   4   1    0.80    0.90
  -1   4  -1    1.60    0.70
  -1   4  -1    0.00    0.60
   1   4   1    1.70    1.00
  -1   4  -1    0.40    0.70
  -1   4  -1    0.80    0.50
  -1   4  -1    1.10    1.00
  -1   4  -1    2.30    0.60
  -1   4  -1    0.70    0.80
   2  -4   1 2126.39   82.79
   2  -4   1 2147.59   84.59
  -2  -4  -1 2153.38   84.79
   2  -4   1 1974.20  102.69
   2  -4   1 2036.60   76.89
  -2   4  -1 2128.19   74.79
  -2   4  -1 2105.39   81.69
  -2   4  -1 2141.19   79.69
  -2   4  -1 2092.99   71.09
   2   4   1 2129.69  103.09
   3  -4   1  375.56   13.80
   3  -4   1  378.26   15.70
  -3  -4  -1  369.46   16.00
  -3  -4  -1  350.66   18.90
   3   4   1  358.96   19.00
  -3   4  -1  382.96   15.60
  -3   4  -1  378.76   13.40
   3   4   1  367.26   13.50
  -3   4  -1  381.56   14.10
  -3   4  -1  366.86   15.20
  -4  -4  -1    6.30    1.10
   4  -4   1    6.60    0.60
   4  -4   1    8.60    1.30
  -4  -4  -1    6.50    1.20
  -4  -4  -1    3.70    1.40
  -4  -4  -1    6.00    1.40
  -4   4  -1    7.00    1.30
   4   4   1    3.70    0.90
  -4   4  -1    4.20    1.20
   4   4   1    6.00    0.80
  -4   4  -1    4.50    1.50
  -4   4  -1    8.00    1.70
  -5  -4  -1   42.60    3.20
   5  -4   1   46.60    2.70
  -5  -4  -1   35.50    3.80
  -5  -4  -1   42.80    2.70
   5  -4   1   40.10    1.70
  -5  -4  -1   42.00    2.90
   5  -4   1   39.00    1.70
  -5   4  -1   41.50    3.20
  -5   4  -1   33.80    3.20
   5   4   1   41.20    2.10
  -5   4  -1   42.00    2.70
  -5   4  -1   39.50    2.80
   5   4   1   37.10    2.60
  -6  -4  -1  197.58    9.40
  -6  -4  -1  201.08   11.80
  -6  -4  -1  184.08    8.00
  -6  -4  -1  210.08    8.80
  -6   4  -1  179.28    9.20
  -6   4  -1  194.88    8.00
   6   4   1  181.98    8.80
  -6   4  -1  193.88    9.30
  -6   4  -1  196.08    8.50
   6   4   1  193.48    7.50
  -7  -4  -1   49.60    3.10
  -7  -4  -1   61.09    3.70
  -7  -4  -1   49.10    4.00
  -7  -4  -1   60.59    5.30
  -7   4  -1   49.10    3.70
  -7   4  -1   59.79    4.50
   7   4   1   55.19    2.70
  -7   4  -1   54.59    3.60
  -7   4  -1   64.49    4.40
   8  -4   1   18.00    1.10
  -8  -4  -1   25.80    2.50
   8  -4   1   22.20    1.10
  -8  -4  -1   25.90    3.90
  -8  -4  -1   22.10    2.90
  -8  -4  -1   24.00    2.00
   8   4   1   22.80    1.70
  -8   4  -1   23.10    2.50
  -8   4  -1   19.40    3.00
  -8   4  -1   19.20    2.90
  -8   4  -1   18.30    2.50
   9  -4   1  221.68    8.40
  -9  -4  -1  218.48    9.10
   9  -4   1  227.08    8.30
  -9  -4  -1  222.68   13.90
  -9  -4  -1  213.38    8.30
  -9   4  -1  210.78   10.10
  -9   4  -1  198.68   11.00
  -9   4  -1  211.78   11.00
  -9   4  -1  223.28    9.50
  -9   4  -1  213.18   11.10
  10  -4   1  115.99    4.70
 -10  -4  -1  111.99    4.70
  10  -4   1  112.19    4.60
 -10  -4  -1  116.19    5.30
 -10   4  -1   99.19    6.40
 -10   4  -1  106.89    7.40
 -10   4  -1  118.39    7.30
 -10   4  -1  121.39    6.70
 -10   4  -1  109.49    6.00
 -11  -4  -1    3.90    0.90
  11  -4   1    3.50    0.70
 -11  -4  -1    3.20    1.00
 -11   4  -1    3.30    2.20
 -11   4  -1    2.50    2.10
 -11   4  -1    4.10    1.90
 -11   4  -1    3.60    1.80
 -11   4  -1    3.20    1.70
 -12  -4  -1  254.27    9.80
  12  -4   1  257.07   10.80
  12  -4   1  255.57   10.20
 -12   4  -1  265.77   12.60
 -12   4  -1  246.68   13.00
 -12   4  -1  264.37   14.10
 -12   4  -1  247.18    8.60
 -12   4  -1  275.57   14.00
 -13  -4  -1    6.60    0.60
 -13  -4  -1    7.00    0.80
 -13  -4  -1    7.70    1.20
 -13   4  -1    3.80    2.50
 -13   4  -1    6.10    0.80
 -13   4  -1    7.40    2.30
 -13   4  -1    8.10    0.80
 -14  -4  -1  128.89    5.50
 -14  -4  -1  125.09    4.50
 -14  -4  -1  131.49    4.70
 -14   4  -1  135.69    4.80
 -14   4  -1  137.19    8.10
 -14   4  -1  135.49    4.70
 -15  -4  -1    3.50    0.70
 -15   4  -1    4.30    2.30
 -15   4  -1    4.20    0.80
 -15   4  -1    5.00    0.70
 -16  -4  -1   14.30    1.20
 -16   4  -1   15.20    1.30
 -16   4  -1   16.70    1.20
 -17  -4  -1    7.00    0.80
 -17   4  -1    7.60    0.80
 -17   4  -1    8.90    0.90
 -18  -4  -1    6.80    0.70
 -18   4  -1    6.10    0.70
 -18   4  -1    6.40    0.80
 -19  -4  -1   41.10    1.60
 -19   4  -1   40.10    1.70
 -19   4  -1   40.10    1.60
 -19  -5   1   19.40    1.10
 -19   5   1   18.70    1.10
 -18  -5   1    8.00    0.80
 -18  -5   1    7.40    0.70
 -18   5   1    8.00    0.80
 -18   5   1    7.10    0.70
 -17  -5   1   66.09    2.50
 -17  -5   1   68.19    2.60
 -17   5   1   64.49    2.60
 -17   5   1   62.79    2.70
 -16  -5   1    8.70    0.80
 -16  -5   1    9.20    0.80
 -16   5   1    8.50    0.90
 -16   5   1    6.80    2.30
 -16   5   1    8.60    0.90
 -15  -5   1  157.58    6.50
 -15  -5   1  156.48    5.40
 -15  -5   1  152.78    5.30
 -15   5   1  149.39    5.40
 -15   5   1  152.68    5.50
 -15   5   1  156.08    8.90
 -14  -5   1    0.60    0.50
 -14  -5   1    0.90    0.60
 -14  -5   1    0.20    0.90
 -14   5   1    1.00    0.60
 -14   5   1    0.10    0.60
 -14   5   1    0.70    1.70
 -13  -5   1  204.38    8.10
 -13  -5   1  197.38    8.40
 -13  -5   1  194.18    6.70
 -13   5   1  196.28   10.60
 -13   5   1  199.38    6.80
  12  -5  -1  131.69    6.30
 -12  -5   1  136.89    4.80
 -12  -5   1  145.79    6.00
 -12  -5   1  146.29    6.70
 -12   5   1  124.29    7.90
 -12   5   1  140.99    9.30
 -12   5   1  150.48    8.50
 -12   5   1  141.69    5.00
 -12   5   1  153.88    9.60
  11  -5  -1   14.30    1.70
 -11  -5   1   17.30    2.30
 -11  -5   1   15.90    1.40
 -11  -5   1   15.30    1.60
 -11  -5   1   17.60    1.30
  11  -5  -1   16.10    1.70
 -11   5   1   15.90    3.60
 -11   5   1   17.50    3.20
 -11   5   1   12.50    3.40
 -11   5   1   19.80    2.90
  10  -5  -1  174.28    7.20
  10  -5  -1  160.48    7.20
 -10  -5   1  161.28    6.80
 -10  -5   1  171.08    6.70
 -10   5   1  181.18    9.00
 -10   5   1  181.68   10.00
 -10   5   1  179.28    8.80
 -10   5   1  160.58    9.70
   9  -5  -1  391.66   15.10
  -9  -5   1  434.16   22.70
   9  -5  -1  386.76   15.20
  -9  -5   1  351.56   14.30
  -9   5   1  384.76   15.30
  -9   5   1  387.86   16.20
  -9   5   1  397.16   18.10
  -9   5   1  402.66   17.90
   8  -5  -1  487.45   19.20
  -8  -5   1  468.75   22.10
  -8  -5   1  545.75   27.90
   8  -5  -1  511.45   19.10
  -8   5   1  511.05   21.70
  -8   5   1  512.85   20.00
  -8   5   1  487.35   22.00
  -8   5   1  519.05   19.10
   7  -5  -1  286.57   11.10
  -7  -5   1  301.87   16.70
   7  -5  -1  292.97   11.20
  -7  -5   1  262.27   13.20
  -7   5   1  276.87   13.30
  -7   5   1  279.97   11.40
  -7   5   1  294.47   13.20
  -7   5   1  287.67   12.00
  -6  -5   1   89.39    5.30
   6  -5  -1   84.89    3.80
   6  -5  -1   80.59    3.90
  -6   5   1   86.79    5.30
  -6   5   1   76.19    5.40
  -6   5   1   90.09    4.60
  -6   5   1   88.09    4.70
  -5  -5   1   58.59    4.10
   5  -5  -1   62.69    3.00
  -5   5   1   62.39    4.40
  -5   5   1   65.19    2.90
  -5   5   1   61.39    4.20
  -5   5   1   62.39    3.70
  -5   5   1   63.59    3.70
  -5   5   1   69.69    3.70
  -4  -5   1  754.92   30.60
   4  -5  -1  728.33   25.70
   4  -5  -1  678.43   25.70
   4  -5  -1  750.92   27.20
   4  -5  -1  760.42   29.90
  -4   5   1  755.42   26.80
  -4   5   1  727.33   25.70
  -4   5   1  752.42   28.90
  -4   5   1  674.23   27.90
  -4   5   1  707.73   26.80
  -3  -5   1 1862.51   72.99
   3  -5  -1 1781.42   63.09
   3  -5  -1 1868.11   72.49
   3  -5  -1 1856.91   66.09
   3  -5  -1 1738.33   88.29
   3  -5  -1 1703.73   63.09
   3  -5  -1 1726.33   71.19
  -3   5   1 1879.41   68.59
   3   5  -1 1765.12   88.39
  -3   5   1 1887.61   69.89
  -3   5   1 1709.83   69.79
  -3   5   1 1788.12   64.09
  -3   5   1 1789.82   65.29
  -3   5   1 1812.72   61.29
   2  -5  -1  379.06   13.60
   2  -5  -1  364.56   14.30
  -2  -5   1  331.67   19.20
  -2  -5   1  394.86   16.30
   2  -5  -1  391.36   15.90
   2  -5  -1  362.26   13.50
   2  -5  -1  344.77   19.20
  -2  -5   1  404.56   15.70
  -2   5   1  359.66   17.20
  -2   5   1  361.36   15.20
  -2   5   1  375.36   13.90
  -2   5   1  402.56   15.30
  -2   5   1  381.86   15.20
   2   5  -1  354.56   19.20
   2   5  -1  380.16   18.00
  -2   5   1  379.46   18.80
  -2   5   1  380.36   17.30
  -2   5   1  395.36   18.80
   1  -5  -1   19.70    1.80
   1  -5  -1   14.70    1.20
  -1  -5   1   20.70    2.10
  -1  -5   1   15.70    1.90
  -1  -5   1   19.20    1.40
   1  -5  -1   21.00    1.50
   1  -5  -1   19.30    1.30
  -1   5   1   16.80    1.90
  -1   5   1   18.90    1.80
  -1   5   1   16.30    1.70
   1   5  -1   17.50    1.90
  -1   5   1   17.70    1.80
   1   5  -1   22.20    2.10
  -1   5   1   18.10    1.80
  -1   5   1   17.40    1.80
   1   5  -1   18.80    2.00
  -1   5   1   11.60    1.50
   1   5  -1   16.60    1.80
   1   5  -1   18.30    1.50
   0  -5   1  641.24   25.90
   0  -5  -1  610.44   22.30
   0  -5   1  637.34   22.20
   0  -5   1  578.84   22.20
   0  -5  -1  640.14   25.80
   0  -5   1  596.24   23.30
   0  -5  -1  570.14   31.10
   0   5  -1  581.84   30.90
   0   5  -1  662.13   31.00
   0   5   1  603.04   31.00
   0   5  -1  610.14   24.90
   0   5   1  625.94   25.00
   0   5  -1  647.44   28.60
   0   5  -1  636.54   24.90
   0   5  -1  620.04   21.50
   0   5   1  642.74   28.80
   0   5  -1  613.14   22.50
   0   5  -1  655.73   28.70
   0   5   1  682.43   24.30
   0   5   1  564.94   31.10
   1  -5   1  795.92   30.80
   1  -5   1  791.22   29.30
   1  -5   1  835.92   29.30
  -1  -5  -1  873.51   34.20
   1  -5   1  866.61   34.10
  -1  -5  -1  746.83   41.20
  -1   5  -1  808.12   29.90
   1   5   1  790.32   41.10
   1   5   1  850.51   38.20
  -1   5  -1  816.32   32.70
   1   5   1  772.42   41.30
  -1   5  -1  850.21   37.50
   1   5   1  816.02   38.20
   1   5   1  853.91   33.10
  -1   5  -1  862.41   32.20
  -1   5  -1  871.61   40.70
  -1   5  -1  835.92   28.60
  -1   5  -1  853.91   32.70
  -1   5  -1  838.12   37.40
  -1   5  -1  826.52   40.70
   2  -5   1   56.79    2.30
   2  -5   1   53.19    2.20
  -2  -5  -1   50.59    3.80
   2  -5   1   56.29    2.90
  -2  -5  -1   60.59    3.60
   2  -5   1   57.19    3.40
   2  -5   1   53.19    2.60
  -2   5  -1   62.69    3.10
  -2   5  -1   55.99    2.50
   2   5   1   57.09    3.90
   2   5   1   53.29    3.90
  -2   5  -1   59.99    3.60
  -2   5  -1   56.59    2.90
  -2   5  -1   51.89    2.40
  -2   5  -1   61.49    3.80
  -3  -5  -1   14.80    2.10
   3  -5   1    9.40    1.00
   3  -5   1   12.20    1.20
   3  -5   1   14.90    1.70
  -3   5  -1   11.30    1.90
  -3   5  -1   15.00    1.70
   3   5   1    9.90    1.70
  -3   5  -1   14.80    1.70
  -3   5  -1   12.40    2.00
   4  -5   1  649.54   25.10
  -4  -5  -1  693.63   28.60
   4  -5   1  693.83   28.00
   4  -5   1  703.93   27.00
  -4   5  -1  662.03   23.90
  -4   5  -1  689.63   27.10
  -4   5  -1  650.33   27.60
  -4   5  -1  662.43   25.10
   5  -5   1  736.93   30.10
  -5  -5  -1  746.93   30.60
  -5  -5  -1  760.42   28.90
  -5  -5  -1  709.83   37.60
   5  -5   1  713.43   26.70
  -5   5  -1  701.83   29.60
  -5   5  -1  717.83   26.90
  -5   5  -1  703.23   25.60
  -5   5  -1  700.53   28.90
  -6  -5  -1    2.90    1.60
  -6  -5  -1   -0.10    1.60
   6  -5   1    2.10    0.50
  -6  -5  -1    2.30    1.20
  -6   5  -1    1.00    1.10
  -6   5  -1    2.70    1.40
  -6   5  -1    1.50    1.60
  -6   5  -1    0.30    1.60
  -7  -5  -1   77.09    6.60
  -7  -5  -1   76.29    4.50
   7  -5   1   81.89    3.40
   7  -5   1   77.99    3.30
  -7  -5  -1   73.89    5.20
  -7   5  -1   79.59    4.70
  -7   5  -1   83.69    5.50
  -7   5  -1   78.99    5.40
  -7   5  -1   82.29    4.60
  -8  -5  -1  190.48    8.50
   8  -5   1  186.88    7.20
  -8  -5  -1  174.38    7.10
  -8  -5  -1  195.78   12.30
  -8  -5  -1  169.28    9.50
   8  -5   1  177.68    7.10
  -8   5  -1  187.88    9.80
  -8   5  -1  185.18    8.70
  -8   5  -1  178.98    9.60
  -8   5  -1  195.78    8.40
  -9  -5  -1  215.38    9.40
   9  -5   1  214.18    8.50
  -9  -5  -1  241.88   14.50
   9  -5   1  219.18    8.60
  -9  -5  -1  222.18    8.30
  -9  -5  -1  216.68    8.40
  -9   5  -1  219.28    9.80
  -9   5  -1  210.98   10.90
  -9   5  -1  213.38   11.40
  -9   5  -1  220.78   10.30
  -9   5  -1  225.08   11.50
 -10  -5  -1   24.30    1.40
 -10  -5  -1   24.10    1.80
  10  -5   1   22.10    1.50
 -10  -5  -1   21.70    1.50
  10  -5   1   24.90    1.60
 -10  -5  -1   31.20    2.50
 -10   5  -1   25.60    3.40
 -10   5  -1   25.60    3.20
 -10   5  -1   27.40    3.10
 -10   5  -1   22.30    3.70
 -10   5  -1   23.30    4.00
  11  -5   1   33.60    2.10
 -11  -5  -1   32.60    2.20
 -11  -5  -1   30.80    2.50
  11  -5   1   33.60    2.00
 -11  -5  -1   37.10    1.70
 -11   5  -1   42.40    4.30
 -11   5  -1   29.80    3.50
 -11   5  -1   36.50    4.90
 -11   5  -1   31.30    3.80
 -11   5  -1   40.50    4.80
  12  -5   1    1.40    0.80
 -12  -5  -1    1.90    0.90
 -12  -5  -1    1.90    0.90
 -12  -5  -1    1.60    0.50
 -12   5  -1   -0.90    2.20
 -12   5  -1    0.40    0.60
 -12   5  -1    1.10    1.80
 -12   5  -1    2.30    1.90
 -12   5  -1    1.20    2.10
 -12   5  -1    1.50    2.20
 -13  -5  -1  785.32   25.30
 -13  -5  -1  786.92   25.30
 -13  -5  -1  788.92   28.20
 -13   5  -1  776.72   25.30
 -13   5  -1  793.52   25.60
 -13   5  -1  785.02   35.10
 -14  -5  -1   49.60    2.10
 -14  -5  -1   49.00    2.90
 -14  -5  -1   53.89    2.20
 -14   5  -1   58.59    2.40
 -14   5  -1   51.79    4.80
 -14   5  -1   54.19    2.20
 -15  -5  -1   81.89    3.10
 -15  -5  -1   83.99    3.80
 -15  -5  -1   80.49    3.00
 -15   5  -1   81.89    3.10
 -15   5  -1   79.69    3.20
 -15   5  -1   82.89    6.10
 -16  -5  -1   79.79    2.90
 -16  -5  -1   84.79    3.10
 -16   5  -1   80.99    6.00
 -16   5  -1   76.49    3.10
 -16   5  -1   77.69    3.00
 -17  -5  -1    1.70    0.50
 -17   5  -1    1.00    0.60
 -17   5  -1    1.80    0.60
 -18  -5  -1   18.90    1.10
 -18   5  -1   17.70    1.10
 -18   5  -1   19.80    1.20
 -19  -5  -1   40.20    1.60
 -19   5  -1   37.40    1.60
 -19  -6   1   15.40    0.90
 -19   6   1   15.10    1.00
 -18  -6   1   72.69    2.70
 -18  -6   1   73.99    2.70
 -18   6   1   78.69    2.90
 -17  -6   1   27.70    1.40
 -17  -6   1   26.20    1.40
 -17   6   1   27.60    1.60
 -17   6   1   28.70    1.50
 -16  -6   1   10.40    1.00
 -16  -6   1    8.20    0.80
 -16   6   1    8.00    0.80
 -16   6   1    9.70    1.00
 -16   6   1    9.10    2.50
 -15  -6   1    7.80    0.80
 -15  -6   1    8.00    1.40
 -15  -6   1    6.60    0.80
 -15   6   1    9.30    2.50
 -15   6   1    6.70    0.80
 -15   6   1    7.60    0.90
 -14  -6   1   22.10    2.10
 -14  -6   1   22.10    1.30
 -14  -6   1   22.40    1.30
 -14   6   1   19.10    1.40
 -14   6   1   24.10    3.50
 -14   6   1   20.90    1.40
 -13  -6   1  231.58    7.70
 -13  -6   1  224.28    7.30
 -13  -6   1  235.68    9.20
 -13  -6   1  227.88    7.60
 -13  -6   1  212.48    9.80
 -13   6   1  228.78   12.00
 -13   6   1  231.88    7.80
 -13   6   1  230.48    7.70
 -12  -6   1   22.10    1.50
 -12  -6   1   23.20    2.60
 -12  -6   1   21.90    1.00
 -12  -6   1   23.10    2.10
 -12  -6   1   21.50    1.40
 -12  -6   1   22.50    1.20
 -12   6   1   26.50    4.10
 -12   6   1   19.70    3.00
 -12   6   1   16.10    3.80
 -12   6   1   20.00    1.30
  11  -6  -1  330.07   12.90
  11  -6  -1  369.66   14.30
 -11  -6   1  359.96   13.50
 -11  -6   1  363.16   13.30
 -11  -6   1  360.16   12.50
  11  -6  -1  364.06   13.00
 -11   6   1  358.76   16.00
 -11   6   1  361.86   17.70
 -11   6   1  356.86   17.00
 -10  -6   1   80.29    3.90
 -10  -6   1   75.09    3.70
  10  -6  -1   83.29    4.10
 -10   6   1   89.59    6.70
 -10   6   1   81.29    5.30
 -10   6   1   77.69    5.50
   9  -6  -1   37.20    2.40
  -9  -6   1   49.50    5.50
  -9  -6   1   38.60    2.40
  -9   6   1   38.70    3.50
  -9   6   1   42.00    4.40
  -9   6   1   43.20    3.90
  -8  -6   1  341.47   17.10
   8  -6  -1  369.96   14.50
  -8  -6   1  401.76   21.70
  -8   6   1  368.36   16.90
  -8   6   1  377.76   14.80
  -8   6   1  383.66   15.50
  -7  -6   1   41.20    3.90
  -7  -6   1   46.60    4.90
   7  -6  -1   41.80    2.40
  -7   6   1   46.90    4.10
  -7   6   1   45.00    3.40
  -7   6   1   35.90    3.30
  -6  -6   1 1026.10   44.00
   6  -6  -1 1087.09   37.00
   6  -6  -1 1073.79   39.10
   6  -6  -1 1029.10   36.90
  -6   6   1 1036.00   38.70
  -6   6   1 1054.89   37.10
  -6   6   1 1035.80   41.60
  -5  -6   1  529.95   22.30
   5  -6  -1  512.35   19.30
   5  -6  -1  520.05   18.20
   5  -6  -1  499.15   18.10
  -5   6   1  505.95   21.10
  -5   6   1  507.65   20.20
  -5   6   1  491.95   18.70
  -5   6   1  498.85   19.40
   4  -6  -1  145.69    6.60
   4  -6  -1  130.39    5.30
  -4  -6   1  143.79    7.40
   4  -6  -1  140.19    5.90
   4  -6  -1  135.29    5.20
  -4   6   1  135.59    6.10
  -4   6   1  134.69    7.00
  -4   6   1  133.79    6.10
  -4   6   1  136.59    5.70
   3  -6  -1  559.84   22.00
   3  -6  -1  500.75   19.80
   3  -6  -1  518.15   18.70
   3  -6  -1  498.75   18.80
  -3  -6   1  549.95   22.50
  -3   6   1  508.65   19.70
   3   6  -1  499.25   26.70
  -3   6   1  538.95   21.20
  -3   6   1  539.55   20.80
  -3   6   1  550.64   19.40
  -3   6   1  491.45   20.70
   2  -6  -1  295.57   11.80
   2  -6  -1  294.67   11.10
  -2  -6   1  325.17   13.60
   2  -6  -1  317.27   13.10
   2   6  -1  289.87   15.70
  -2   6   1  304.07   12.50
  -2   6   1  294.47   12.50
  -2   6   1  315.17   12.70
  -2   6   1  275.57   13.90
  -2   6   1  265.37   11.80
  -2   6   1  279.07   14.00
  -2   6   1  307.67   15.20
  -2   6   1  330.37   15.30
  -2   6   1  301.77   11.40
   1  -6  -1  377.16   14.00
   1  -6  -1  379.26   16.40
  -1  -6   1  405.76   16.70
  -1   6   1  386.66   18.00
   1   6  -1  378.96   18.30
  -1   6   1  371.26   15.60
   1   6  -1  396.36   18.30
   1   6  -1  368.16   14.30
  -1   6   1  354.76   17.90
  -1   6   1  376.06   19.40
   1   6  -1  391.16   19.60
  -1   6   1  404.46   19.50
  -1   6   1  350.56   15.80
   0  -6   1    1.50    0.60
   0  -6  -1    2.30    1.20
   0  -6  -1    0.10    0.90
   0  -6   1    1.00    1.10
   0   6  -1    1.20    0.90
   0   6   1    1.30    1.20
   0   6  -1    0.90    0.90
   0   6   1    1.00    0.90
   0   6  -1    0.10    0.90
   0   6  -1    0.50    0.70
   0   6  -1    0.20    0.80
   0   6   1    0.50    1.10
   0   6  -1    0.80    0.90
   0   6   1   -0.20    1.00
   0   6  -1    1.10    0.90
   0   6  -1    1.10    1.20
   0   6   1    0.30    0.80
   1  -6   1  268.47   11.70
  -1  -6  -1  270.57   11.70
   1  -6   1  252.27    9.60
   1  -6   1  248.78   10.20
  -1   6  -1  254.87   10.90
  -1   6  -1  258.47   11.20
  -1   6  -1  249.88   12.10
  -1   6  -1  261.37   13.30
   1   6   1  262.27   13.80
   1   6   1  249.18   11.30
  -1   6  -1  272.67   10.10
  -1   6  -1  244.18   11.90
  -1   6  -1  244.48   10.80
  -1   6  -1  265.87   13.20
  -1   6  -1  254.17    9.70
   2  -6   1  659.23   24.20
   2  -6   1  637.54   23.00
  -2  -6  -1  688.23   27.30
   2  -6   1  620.64   23.00
   2  -6   1  700.73   27.10
  -2   6  -1  643.44   22.80
   2   6   1  664.33   26.40
   2   6   1  633.74   32.60
  -2   6  -1  649.24   25.70
  -2   6  -1  673.53   23.80
  -2   6  -1  576.04   25.30
  -2   6  -1  602.04   25.40
   3  -6   1  869.91   34.70
   3  -6   1  784.42   29.50
   3  -6   1  817.92   31.20
  -3  -6  -1  875.81   35.10
   3  -6   1  883.11   33.70
   3  -6   1  816.42   29.60
  -3   6  -1  848.42   30.70
  -3   6  -1  807.52   29.30
  -3   6  -1  836.12   33.10
  -4  -6  -1   26.40    2.90
   4  -6   1   25.90    1.70
   4  -6   1   27.10    1.90
   4  -6   1   24.90    2.40
  -4   6  -1   29.20    2.50
  -4   6  -1   22.70    2.30
  -4   6  -1   30.60    3.30
  -4   6  -1   25.50    3.00
  -5  -6  -1  853.71   44.30
   5  -6   1  821.42   31.60
   5  -6   1  818.12   34.10
  -5  -6  -1  903.71   34.10
  -5  -6  -1  890.51   36.10
  -5   6  -1  864.41   34.20
  -5   6  -1  834.32   35.00
  -5   6  -1  840.22   31.60
  -5   6  -1  846.62   30.30
  -6  -6  -1  127.59    8.20
   6  -6   1   97.39    4.80
  -6  -6  -1  110.79    5.60
   6  -6   1  103.59    4.50
  -6  -6  -1  102.79    6.30
  -6   6  -1  104.19    6.30
  -6   6  -1  101.09    5.50
  -6   6  -1   97.09    6.30
  -6   6  -1  102.59    5.40
   7  -6   1  524.25   19.40
  -7  -6  -1  476.75   22.90
  -7  -6  -1  533.95   28.50
  -7   6  -1  526.15   20.40
  -7   6  -1  520.55   22.70
  -7   6  -1  504.95   22.10
  -7   6  -1  519.35   22.30
  -7   6  -1  519.55   19.50
  -8  -6  -1    1.10    1.60
   8  -6   1    0.50    0.50
  -8  -6  -1   -0.20    1.80
  -8  -6  -1    0.60    0.60
  -8   6  -1    0.20    1.50
  -8   6  -1    1.60    1.90
  -8   6  -1    2.90    1.60
  -8   6  -1   -0.40    1.20
  -8   6  -1    2.70    2.00
   9  -6   1  137.79    5.60
  -9  -6  -1  131.19    5.40
  -9  -6  -1  132.69    5.60
  -9  -6  -1  113.09    7.80
  -9   6  -1  133.09    7.30
  -9   6  -1  137.99    7.60
  -9   6  -1  133.29    8.40
  -9   6  -1  144.79    7.20
  -9   6  -1  130.59    8.30
  10  -6   1  108.29    4.70
 -10  -6  -1  107.69    4.80
 -10  -6  -1  111.09    4.50
 -10   6  -1  107.39    6.70
 -10   6  -1  101.79    7.70
 -10   6  -1  110.49    6.40
 -10   6  -1  114.29    7.80
 -10   6  -1  109.29    6.70
  11  -6   1  334.27   13.40
 -11  -6  -1  334.87   12.50
 -11  -6  -1  359.96   12.50
 -11  -6  -1  366.66   14.30
 -11  -6  -1  353.46   12.10
 -11  -6  -1  341.47   11.30
 -11  -6  -1  354.26   13.10
 -11   6  -1  330.67   15.60
 -11   6  -1  326.57   16.60
 -11   6  -1  347.57   17.60
 -11   6  -1  336.27   17.20
 -11   6  -1  354.66   11.50
 -11   6  -1  339.17   14.80
 -12  -6  -1   10.80    1.70
 -12  -6  -1    9.00    0.90
 -12  -6  -1    9.40    1.40
 -12   6  -1   10.10    0.90
 -12   6  -1   10.10    2.50
 -12   6  -1    5.90    2.70
 -13  -6  -1   14.10    1.70
 -13  -6  -1   15.90    1.10
 -13  -6  -1   14.20    1.00
 -13   6  -1   17.20    1.20
 -13   6  -1   15.20    1.30
 -13   6  -1   15.90    3.00
 -14  -6  -1   85.09    3.20
 -14  -6  -1   89.59    3.30
 -14  -6  -1   91.39    4.20
 -14   6  -1   86.69    3.30
 -14   6  -1   86.79    3.40
 -14   6  -1   81.19    6.30
 -15  -6  -1   27.00    1.50
 -15  -6  -1   28.50    1.40
 -15  -6  -1   28.70    2.10
 -15   6  -1   30.90    1.60
 -15   6  -1   30.10    1.70
 -15   6  -1   32.30    3.90
 -16  -6  -1   44.70    1.90
 -16  -6  -1   42.50    1.80
 -16   6  -1   41.70    2.00
 -16   6  -1   44.00    1.90
 -16   6  -1   48.40    4.50
 -17  -6  -1   67.09    2.50
 -17  -6  -1   65.39    2.50
 -17   6  -1   65.69    2.70
 -17   6  -1   66.79    2.60
 -18  -6  -1    0.20    0.40
 -18   6  -1    0.40    0.50
 -19  -6  -1    3.90    0.50
 -19  -7   1    1.30    0.40
  19   7  -1    1.70    0.50
 -19   7   1    2.20    0.50
 -18  -7   1   51.09    2.00
 -18  -7   1   50.79    2.00
  18   7  -1   51.89    2.10
 -18   7   1   53.89    2.20
  18   7  -1   52.19    2.10
 -17  -7   1   15.40    1.00
 -17  -7   1   12.70    1.00
 -17   7   1   11.60    2.40
 -17   7   1   14.80    1.20
  17   7  -1   12.90    1.10
 -16  -7   1   47.00    2.00
 -16  -7   1   45.80    2.00
 -16   7   1   43.90    2.10
  16   7  -1   48.20    2.10
 -16   7   1   42.60    4.30
 -15  -7   1    1.30    0.60
 -15  -7   1    0.60    0.60
 -15  -7   1    2.50    1.10
  15   7  -1    1.40    0.70
 -15   7   1    1.80    0.60
 -15   7   1    3.30    2.00
 -15   7   1    0.90    0.60
 -14  -7   1    1.50    0.60
 -14  -7   1    1.00    1.10
 -14  -7   1    1.20    0.60
 -14   7   1    1.10    0.60
  14   7  -1    0.90    0.60
 -14   7   1    0.10    0.70
 -14   7   1    3.10    2.00
 -13  -7   1   80.99    4.30
 -13  -7   1   81.29    3.10
 -13  -7   1   82.69    2.80
 -13  -7   1   81.29    3.10
 -13   7   1   78.29    5.90
 -13   7   1   87.19    3.20
 -13   7   1   81.99    3.20
  13   7  -1   86.09    3.20
 -12  -7   1   64.59    3.60
 -12  -7   1   67.49    2.30
 -12  -7   1   69.69    3.10
 -12  -7   1   65.29    2.60
 -12   7   1   59.59    5.60
 -12   7   1   63.29    2.60
 -12   7   1   61.19    3.30
 -12   7   1   62.89    5.00
 -11  -7   1   63.19    3.60
 -11  -7   1   66.69    2.60
  11  -7  -1   69.09    3.80
 -11  -7   1   68.69    2.80
 -11  -7   1   73.29    3.40
 -11   7   1   58.39    6.20
 -11   7   1   70.29    5.60
 -11   7   1   74.59    5.20
 -11   7   1   65.99    3.40
 -11   7   1   67.79    2.70
  10  -7  -1  284.37   10.60
  10  -7  -1  282.27   11.60
 -10  -7   1  283.47   11.00
 -10   7   1  280.17   13.00
 -10   7   1  290.27   11.30
 -10   7   1  259.17   13.70
 -10   7   1  308.47   14.80
   9  -7  -1  219.18    8.10
  -9  -7   1  204.18    8.50
   9  -7  -1  212.08    9.00
  -9  -7   1  190.28   11.60
   9  -7  -1  212.98    8.10
  -9   7   1  217.78    8.80
  -9   7   1  241.48   11.90
  -9   7   1  227.18   11.00
  -9   7   1  225.78   10.40
   8  -7  -1  372.66   13.80
  -8  -7   1  420.76   22.50
  -8  -7   1  351.76   14.20
   8  -7  -1  384.36   13.90
   8  -7  -1  383.96   15.00
  -8  -7   1  346.87   17.80
  -8   7   1  402.36   17.60
  -8   7   1  396.96   14.90
  -8   7   1  376.16   17.50
  -8   7   1  391.36   16.00
   7  -7  -1  109.19    5.10
  -7  -7   1  124.39    8.80
   7  -7  -1  113.89    4.50
   7  -7  -1  110.09    4.40
  -7  -7   1   89.49    6.50
  -7   7   1  122.49    7.10
  -7   7   1  109.99    6.00
   6  -7  -1   11.10    1.10
  -6  -7   1    9.90    2.40
   6  -7  -1   11.20    1.00
   6  -7  -1    8.90    1.30
  -6   7   1   12.90    2.10
  -6   7   1   10.30    2.50
   5  -7  -1  978.70   36.10
  -5  -7   1  938.61   40.60
   5  -7  -1  991.50   34.30
  -5   7   1  911.01   35.40
  -5   7   1  983.80   38.40
  -4  -7   1   69.39    4.70
   4  -7  -1   71.09    3.20
  -4   7   1   65.49    3.80
  -4   7   1   68.19    4.70
  -3  -7   1  171.58    8.50
   3  -7  -1  166.98    6.50
   3  -7  -1  173.08    7.90
  -3   7   1  159.68    7.10
  -3   7   1  151.38    7.90
  -3   7   1  156.98    7.00
   3   7  -1  160.98    9.60
  -2  -7   1  131.89    6.90
   2  -7  -1  119.99    5.20
   2  -7  -1  127.89    6.40
   2   7  -1  135.79    7.60
  -2   7   1  110.49    6.20
  -2   7   1  124.99    5.90
  -2   7   1  128.09    6.80
  -2   7   1  133.09    6.90
  -2   7   1  114.59    6.00
  -2   7   1  118.19    6.40
   1  -7  -1  290.57   12.90
  -1  -7   1  290.67   13.10
  -1   7   1  277.97   14.00
  -1   7   1  283.87   12.40
   1   7  -1  314.47   15.30
  -1   7   1  271.57   12.30
  -1   7   1  311.77   15.00
   1   7  -1  264.77   12.40
   1   7  -1  272.87   14.10
   1   7  -1  303.67   14.40
  -1   7   1  262.77   13.70
   0  -7   1    4.20    1.60
   0  -7  -1    9.90    1.90
   0   7   1    5.40    1.40
   0   7  -1    5.00    1.40
   0   7   1    3.70    1.40
   0   7  -1    7.20    1.50
   0   7  -1    5.30    1.40
   0   7   1    5.10    1.50
   0   7  -1    5.00    1.60
   0   7  -1    5.10    1.30
   0   7   1    7.50    1.70
   0   7  -1    4.10    1.20
   0   7   1    6.90    1.50
   1  -7   1   74.89    3.60
   1  -7   1   85.69    4.80
  -1  -7  -1   85.09    4.90
  -1   7  -1   73.89    4.70
  -1   7  -1   79.69    4.10
  -1   7  -1   74.09    3.90
  -1   7  -1   84.29    4.60
  -1   7  -1   74.99    3.90
   1   7   1   95.19    5.50
  -1   7  -1   75.59    4.00
   1   7   1   68.29    4.50
  -1   7  -1   76.69    4.70
  -2  -7  -1  129.19    6.70
   2  -7   1  122.29    6.40
   2  -7   1  123.39    5.00
  -2   7  -1  115.69    5.40
  -2   7  -1  115.79    5.20
  -2   7  -1  117.99    5.50
  -2   7  -1  116.79    5.50
   2   7   1  123.59    7.40
  -2   7  -1  117.49    6.40
  -3  -7  -1  150.88    7.70
   3  -7   1  136.59    7.10
   3  -7   1  147.09    5.60
   3  -7   1  140.29    5.60
   3  -7   1  146.49    6.10
  -3   7  -1  127.29    6.20
  -3   7  -1  143.59    7.40
  -3   7  -1  138.49    6.40
   4  -7   1   20.90    1.70
   4  -7   1   21.20    1.30
   4  -7   1   23.80    1.40
   4  -7   1   21.80    2.30
  -4  -7  -1   15.50    2.50
  -4   7  -1   22.50    2.40
  -4   7  -1   24.50    3.10
  -4   7  -1   22.90    2.40
   5  -7   1    0.50    0.60
   5  -7   1    0.60    0.40
  -5  -7  -1    2.80    1.80
  -5   7  -1   -0.10    1.20
  -5   7  -1   -0.80    1.20
  -5   7  -1   -1.20    1.40
  -6  -7  -1  242.88   12.40
   6  -7   1  256.27   10.00
   6  -7   1  242.98   10.90
  -6  -7  -1  270.97   15.50
  -6   7  -1  248.88   12.60
  -6   7  -1  251.17   10.60
  -6   7  -1  241.08   10.80
  -6   7  -1  239.18   11.50
  -6   7  -1  267.17   12.20
   7  -7   1   14.40    1.60
  -7  -7  -1   17.60    3.00
  -7  -7  -1   18.00    3.60
  -7  -7  -1   15.00    1.50
   7  -7   1   15.20    1.40
  -7   7  -1   17.40    2.70
  -7   7  -1   22.30    2.90
  -7   7  -1   26.50    3.90
  -7   7  -1   17.10    3.00
  -7   7  -1   17.10    2.20
  -7   7  -1   12.60    2.20
   8  -7   1  317.27   12.60
  -8  -7  -1  308.27   12.20
   8  -7   1  337.07   13.80
  -8  -7  -1  281.47   15.60
  -8   7  -1  326.97   13.50
  -8   7  -1  333.57   12.60
  -8   7  -1  339.67   15.60
  -8   7  -1  345.27   16.20
  -8   7  -1  324.87   14.10
  -8   7  -1  324.87   15.40
   9  -7   1   87.49    4.50
  -9  -7  -1   84.49    4.00
  -9  -7  -1   92.49    4.20
   9  -7   1   83.39    4.10
  -9  -7  -1   77.89    6.20
  -9   7  -1   83.79    3.90
  -9   7  -1   92.69    5.80
  -9   7  -1   87.59    6.70
  -9   7  -1   99.89    6.00
  -9   7  -1   94.29    5.90
  -9   7  -1   91.89    7.00
  10  -7   1  172.08    7.20
  10  -7   1  176.08    8.20
 -10  -7  -1  166.28    7.10
 -10  -7  -1  171.48    6.20
 -10  -7  -1  159.88    6.80
 -10   7  -1  171.18    8.90
 -10   7  -1  177.78   10.40
 -10   7  -1  177.28    9.50
 -10   7  -1  176.98   10.70
 -10   7  -1  166.38    9.10
 -11  -7  -1  731.23   25.40
 -11  -7  -1  717.43   24.50
 -11  -7  -1  716.43   22.50
 -11  -7  -1  740.93   25.80
 -11  -7  -1  665.73   25.50
 -11  -7  -1  692.13   22.90
 -11   7  -1  742.73   32.00
 -11   7  -1  717.53   23.20
 -11   7  -1  694.93   31.20
 -11   7  -1  694.53   28.80
 -11   7  -1  710.33   27.40
 -11   7  -1  704.33   32.10
 -12  -7  -1    0.60    0.50
 -12  -7  -1    0.80    0.90
 -12  -7  -1    1.10    0.60
 -12  -7  -1    0.40    1.10
 -12  -7  -1    1.70    0.60
 -12  -7  -1    0.60    0.30
 -12   7  -1    0.20    1.80
 -12   7  -1    0.40    0.60
 -12   7  -1    0.20    0.60
 -13  -7  -1  148.09    5.30
 -13  -7  -1  141.29    6.50
 -13  -7  -1  149.69    5.20
 -13   7  -1  153.48    9.00
 -13   7  -1  158.98    5.40
 -13   7  -1  156.78    5.30
 -14  -7  -1   63.59    2.60
 -14  -7  -1   69.79    2.70
 -14  -7  -1   71.29    3.70
 -14   7  -1   73.49    5.60
 -14   7  -1   64.49    2.70
 -14   7  -1   67.49    2.80
 -15  -7  -1    6.30    1.20
 -15  -7  -1    6.40    0.70
 -15  -7  -1    5.40    0.70
 -15   7  -1    5.90    2.30
 -15   7  -1    4.70    0.70
 -15   7  -1    4.80    0.80
 -16  -7  -1   32.00    1.50
 -16  -7  -1   30.30    1.50
 -16   7  -1   30.50    1.60
 -16   7  -1   26.80    3.70
 -17  -7  -1   60.39    2.30
 -17  -7  -1   56.09    2.30
 -17   7  -1   59.39    2.40
 -18  -7  -1    0.70    0.40
 -18  -7  -1    0.90    0.40
 -18   7  -1    1.80    0.60
 -18  -8   1    2.70    0.50
  18   8  -1    1.20    0.50
 -18   8   1    3.00    0.60
  18   8  -1    1.80    0.50
 -17  -8   1   10.60    0.90
 -17  -8   1   11.90    1.00
 -17   8   1   10.40    1.10
  17   8  -1   10.10    1.00
  17   8  -1    9.40    1.00
 -16  -8   1    4.80    0.60
 -16  -8   1    4.30    0.70
  16   8  -1    3.80    0.70
 -16   8   1    5.00    0.80
 -16   8   1    4.50    1.90
 -15  -8   1   -0.20    0.50
 -15  -8   1    0.60    0.50
 -15  -8   1    0.30    1.00
 -15   8   1    2.40    1.80
 -15   8   1    0.30    0.60
  15   8  -1   -0.70    0.60
 -14  -8   1   66.69    2.70
 -14  -8   1   70.29    2.70
 -14  -8   1   62.29    3.80
 -14   8   1   69.89    2.80
 -14   8   1   69.79    5.60
  14   8  -1   69.99    2.80
 -13  -8   1   37.20    1.70
 -13  -8   1   33.60    2.70
 -13  -8   1   35.20    1.70
 -13  -8   1   36.70    1.40
 -13   8   1   38.40    1.80
  13   8  -1   35.10    1.80
 -13   8   1   32.90    4.00
 -12  -8   1  755.42   23.70
 -12  -8   1  750.52   26.70
 -12  -8   1  729.23   26.40
 -12  -8   1  730.43   23.20
 -12   8   1  750.42   32.80
 -12   8   1  693.13   27.90
 -12   8   1  744.63   23.90
 -12   8   1  725.03   23.60
  12   8  -1  713.93   24.20
 -11  -8   1    5.60    0.70
 -11  -8   1    4.30    0.70
 -11  -8   1    4.40    0.70
 -11  -8   1    5.50    0.60
 -11  -8   1    3.80    1.20
 -11  -8   1    2.80    1.00
 -11   8   1    2.00    2.40
 -11   8   1    4.50    3.10
 -11   8   1    4.70    0.80
 -11   8   1    6.10    2.20
 -11   8   1    4.90    1.10
 -10  -8   1  598.64   20.50
 -10  -8   1  585.34   21.80
 -10  -8   1  611.94   19.20
 -10   8   1  575.64   22.80
 -10   8   1  564.74   26.70
 -10   8   1  595.34   26.60
 -10   8   1  627.04   24.40
  -9  -8   1   -0.30    1.60
   9  -8  -1    0.60    0.60
  -9   8   1    2.50    1.80
  -9   8   1    0.80    0.80
  -9   8   1   -1.60    1.90
  -9   8   1   -1.70    1.30
   8  -8  -1   82.59    3.90
  -8  -8   1   77.89    6.10
  -8   8   1   95.69    5.70
  -8   8   1   89.29    4.20
  -8   8   1   87.19    6.40
  -8   8   1   98.59    5.70
  -7  -8   1   24.50    3.60
  -7  -8   1   32.80    4.70
   7  -8  -1   34.00    2.10
  -7  -8   1   35.50    2.20
  -7   8   1   33.00    3.20
  -7   8   1   33.10    4.00
  -7   8   1   34.80    3.30
  -7   8   1   35.50    2.30
   6  -8  -1  919.11   31.80
  -6  -8   1  810.32   37.90
  -6   8   1  871.11   33.20
  -6   8   1  870.51   33.50
  -6   8   1  884.81   37.10
  -6   8   1  953.20   36.20
   5  -8  -1    1.80    0.70
  -5  -8   1    1.00    1.60
  -5   8   1    2.40    1.70
  -4  -8   1   30.60    3.30
   4  -8  -1   27.40    2.00
  -4   8   1   34.60    3.50
  -3  -8   1   45.20    3.90
   3  -8  -1   44.20    3.30
  -3   8   1   38.80    3.70
  -3   8   1   42.80    2.40
  -3   8   1   39.80    2.50
   2  -8  -1  127.99    6.90
  -2  -8   1  123.99    7.30
  -2   8   1  130.19    7.00
  -2   8   1  133.49    6.30
   2   8  -1  136.19    7.00
  -2   8   1  135.59    6.40
   2   8  -1  144.09    8.30
  -2   8   1  127.59    6.40
   1  -8  -1  256.47   12.20
  -1  -8   1  254.57   12.40
   1   8  -1  269.17   11.80
   1   8  -1  270.57   14.20
  -1   8   1  254.47   11.60
  -1   8   1  249.78   12.90
   1   8  -1  249.18   13.30
  -1   8   1  270.57   12.80
  -1   8   1  248.48   11.70
  -1   8   1  276.57   14.00
   0  -8   1  846.92   35.80
   0  -8  -1  833.62   35.60
   0   8   1  820.42   33.50
   0   8  -1  837.22   33.80
   0   8   1  853.91   34.60
   0   8  -1  783.12   39.30
   0   8   1  792.82   39.40
   0   8  -1  922.21   42.60
   0   8  -1  864.61   39.10
   0   8   1  854.31   39.60
   0   8  -1  856.01   34.30
   0   8   1  922.61   42.80
  -1  -8  -1   62.19    4.40
   1  -8   1   61.09    4.30
   1   8   1   58.49    4.20
  -1   8  -1   64.89    3.90
   1   8   1   65.29    4.70
  -1   8  -1   65.29    3.70
  -1   8  -1   62.69    4.50
   1   8   1   55.49    4.20
  -1   8  -1   64.29    4.10
  -2  -8  -1   74.09    4.90
   2  -8   1   78.19    3.60
   2  -8   1   78.19    4.80
  -2   8  -1   76.99    3.60
  -2   8  -1   72.19    5.00
  -2   8  -1   69.99    3.70
  -2   8  -1   75.99    4.20
   3  -8   1    1.80    1.30
   3  -8   1    1.30    0.70
  -3  -8  -1    1.20    1.40
  -3   8  -1   -0.10    1.30
  -3   8  -1    1.70    1.60
  -4  -8  -1  171.68    9.20
   4  -8   1  167.28    8.50
   4  -8   1  175.58    6.80
  -4   8  -1  166.78    7.70
  -4   8  -1  168.78    7.70
  -4   8  -1  169.98    8.90
   5  -8   1   34.40    2.40
  -5  -8  -1   34.60    3.80
   5  -8   1   42.90    2.20
  -5   8  -1   39.10    3.40
  -5   8  -1   43.80    4.10
  -5   8  -1   41.20    3.10
  -5   8  -1   38.50    3.30
   6  -8   1  304.37   12.20
   6  -8   1  312.67   11.30
  -6  -8  -1  307.27   14.90
  -6  -8  -1  316.87   18.40
   6  -8   1  287.67   11.20
  -6  -8  -1  290.17   14.90
  -6   8  -1  307.97   13.90
  -6   8  -1  302.77   12.00
  -6   8  -1  301.77   12.90
  -6   8  -1  312.07   12.70
  -6   8  -1  307.07   14.50
   7  -8   1   36.00    1.90
   7  -8   1   33.60    2.40
  -7  -8  -1   39.50    4.10
   7  -8   1   40.10    2.00
  -7   8  -1   46.00    4.60
  -7   8  -1   40.90    3.20
  -7   8  -1   36.70    2.30
  -7   8  -1   39.60    3.50
  -7   8  -1   35.80    3.50
  -7   8  -1   34.30    3.50
  -8  -8  -1   25.60    3.90
   8  -8   1   28.30    1.50
   8  -8   1   23.40    1.40
   8  -8   1   24.50    2.00
  -8  -8  -1   22.50    2.00
  -8   8  -1   24.50    3.80
  -8   8  -1   22.30    3.20
  -8   8  -1   28.50    3.20
  -8   8  -1   23.50    3.20
  -8   8  -1   22.70    1.80
  -9  -8  -1  124.09    5.50
  -9  -8  -1  105.99    8.00
   9  -8   1  117.89    4.80
   9  -8   1  119.49    5.60
  -9  -8  -1  132.49    4.70
   9  -8   1  122.69    4.90
  -9   8  -1  129.69    7.60
  -9   8  -1  119.99    7.30
  -9   8  -1  116.39    5.30
  -9   8  -1  130.59    7.30
  -9   8  -1  131.29    8.50
 -10  -8  -1  277.17    9.10
 -10  -8  -1  281.77    9.80
 -10  -8  -1  274.67    8.90
 -10  -8  -1  280.27   10.60
 -10   8  -1  272.37    9.30
 -10   8  -1  260.37   12.50
 -10   8  -1  287.17   14.80
 -10   8  -1  252.57   10.90
 -10   8  -1  300.57   14.10
 -10   8  -1  285.97   13.30
 -11  -8  -1  116.39    5.50
 -11  -8  -1  122.49    4.10
 -11  -8  -1  121.09    4.30
 -11  -8  -1  124.09    5.10
 -11  -8  -1  124.49    4.60
 -11   8  -1  117.29    7.70
 -11   8  -1  122.19    4.40
 -11   8  -1  120.19    7.60
 -12  -8  -1  121.99    4.30
 -12  -8  -1  121.99    4.00
 -12  -8  -1  125.59    4.70
 -12  -8  -1  118.39    4.30
 -12  -8  -1  115.19    5.60
 -12  -8  -1  125.49    4.70
 -12   8  -1  118.19    4.40
 -12   8  -1  123.29    7.80
  12   8   1  119.29    4.40
 -12   8  -1  132.19    4.50
 -13  -8  -1   27.40    1.40
 -13  -8  -1   22.50    2.20
 -13  -8  -1   26.60    1.40
 -13   8  -1   28.20    3.80
 -13   8  -1   23.70    1.50
 -13   8  -1   23.90    1.60
  13   8   1   25.10    1.50
 -14  -8  -1   20.00    2.10
 -14  -8  -1   18.60    1.20
 -14  -8  -1   19.00    1.30
 -14   8  -1   23.30    3.60
  14   8   1   19.50    1.30
 -14   8  -1   19.50    1.40
 -15  -8  -1   11.90    1.50
 -15  -8  -1   12.00    1.00
 -15  -8  -1   13.60    1.10
  15   8   1   12.90    1.20
 -15   8  -1   14.40    2.80
 -15   8  -1   11.70    1.20
 -16  -8  -1   39.50    1.80
 -16  -8  -1   43.40    1.90
  16   8   1   43.50    1.90
 -16   8  -1   46.10    4.20
 -16   8  -1   46.20    2.00
 -17  -8  -1   47.70    2.00
 -17  -8  -1   50.39    2.00
 -17   8  -1   51.49    2.10
  17   8   1   49.40    2.00
 -18  -8  -1   35.20    1.40
  18   8   1   35.70    1.50
  18   8   1   36.50    1.50
 -18   8  -1   36.00    1.60
 -18  -9   1   53.89    2.10
  18   9  -1   59.49    2.20
 -18   9   1   58.09    2.20
 -17  -9   1   14.80    1.00
 -17   9   1   13.40    1.10
  17   9  -1   16.00    1.10
  17   9  -1   12.80    1.10
 -16  -9   1    0.40    0.50
 -16   9   1    2.10    1.60
  16   9  -1    0.40    0.60
 -16   9   1    0.60    0.60
 -15  -9   1    1.10    1.10
 -15  -9   1    0.90    0.60
 -15   9   1    1.40    0.60
 -15   9   1    1.70    1.80
  15   9  -1    1.80    0.70
 -14  -9   1   74.09    4.00
 -14  -9   1   67.99    2.70
 -14   9   1   68.69    2.80
  14   9  -1   68.19    2.80
 -14   9   1   72.69    5.60
 -13  -9   1   19.00    1.30
 -13  -9   1   20.70    1.00
 -13  -9   1   21.50    1.50
 -13  -9   1   20.20    1.30
 -13  -9   1   21.20    2.20
 -13   9   1   20.30    1.40
 -13   9   1   27.40    3.80
  13   9  -1   21.30    1.40
 -12  -9   1    4.00    0.70
 -12  -9   1    4.00    1.00
 -12  -9   1    3.70    0.50
 -12  -9   1    2.20    1.10
 -12   9   1    2.60    0.70
  12   9  -1    3.20    0.70
 -12   9   1    3.60    1.20
 -12   9   1    3.00    2.00
 -11  -9   1   15.40    1.00
 -11  -9   1   12.00    1.60
 -11  -9   1   15.20    1.20
 -11  -9   1   17.20    2.00
 -11  -9   1   15.50    1.20
 -11  -9   1   15.60    1.20
  11   9  -1   15.60    1.30
 -11   9   1   14.10    2.90
 -11   9   1   18.60    1.90
 -11   9   1   13.90    1.30
 -10  -9   1  110.49    3.90
 -10  -9   1  110.79    4.20
 -10  -9   1  113.49    4.30
 -10  -9   1  119.09    4.10
 -10   9   1  114.49    4.10
 -10   9   1  119.89    8.50
 -10   9   1  107.19    5.30
 -10   9   1  119.89    7.30
   9  -9  -1  440.76   16.40
  -9  -9   1  426.16   15.00
  -9  -9   1  408.66   20.70
  -9  -9   1  450.55   14.20
  -9   9   1  404.26   20.10
  -9   9   1  448.76   17.10
  -9   9   1  442.96   20.50
   8  -9  -1   10.40    1.40
  -8  -9   1    6.50    2.50
  -8   9   1   11.50    1.50
  -8   9   1    9.90    2.90
  -8   9   1   10.70    2.30
   7  -9  -1  133.39    6.10
  -7  -9   1  145.19    7.30
  -7  -9   1  115.49    8.30
  -7   9   1  144.69    7.30
  -7   9   1  140.59    6.30
  -7   9   1  153.58    8.80
  -6  -9   1    8.50    1.30
  -6  -9   1    9.90    2.50
  -6   9   1    8.70    1.40
  -6   9   1   10.50    1.90
  -6   9   1    7.30    2.50
  -5  -9   1  240.08   12.20
  -5   9   1  236.18   11.60
  -5   9   1  228.98    9.60
  -5   9   1  230.08   10.80
  -5   9   1  226.98    8.50
  -4  -9   1   21.70    3.20
  -4   9   1   27.30    3.50
  -4   9   1   26.50    2.20
  -3  -9   1  134.89    7.80
   3  -9  -1  143.29    7.30
  -3   9   1  137.79    5.80
  -3   9   1  116.29    5.90
  -3   9   1  132.89    7.40
  -2  -9   1    6.60    2.10
   2  -9  -1    3.20    1.60
   2   9  -1    5.40    1.80
  -2   9   1    3.50    1.20
  -2   9   1    2.30    1.70
  -1  -9   1   43.20    3.90
   1  -9  -1   48.40    3.70
  -1   9   1   53.69    4.10
   1   9  -1   42.60    3.50
  -1   9   1   48.10    3.20
   1   9  -1   43.50    3.90
   1   9  -1   42.80    3.70
  -1   9   1   44.90    3.30
  -1   9   1   39.40    3.20
   1   9  -1   45.00    3.60
   0  -9   1   92.09    5.80
   0  -9  -1   90.29    5.70
   0   9  -1   79.59    5.30
   0   9  -1   93.69    5.20
   0   9   1  107.79    5.70
   0   9  -1   88.69    5.70
   0   9  -1   95.69    5.30
   0   9   1   98.99    5.70
   0   9   1   90.69    5.80
   0   9   1   91.89    5.70
  -1  -9  -1    2.60    1.60
   1  -9   1    3.20    1.60
   1   9   1    1.70    1.40
   1   9   1    4.40    1.80
  -1   9  -1    3.60    1.10
  -1   9  -1    3.90    2.00
   2  -9   1   20.20    2.80
  -2  -9  -1   20.60    2.90
  -2   9  -1   18.00    3.00
  -2   9  -1   20.20    1.60
   2   9   1   18.40    2.70
  -2   9  -1   18.10    1.40
   3  -9   1  114.49    6.50
  -3  -9  -1  117.29    7.00
  -3   9  -1  109.69    5.80
  -3   9  -1  110.29    5.20
  -3   9  -1  101.49    5.80
  -3   9  -1  123.49    7.00
   4  -9   1  447.16   16.70
  -4  -9  -1  445.96   20.60
  -4   9  -1  454.25   17.50
  -4   9  -1  465.85   19.80
  -4   9  -1  426.26   19.50
  -4   9  -1  446.36   17.30
   5  -9   1  357.46   13.10
  -5  -9  -1  353.06   16.70
  -5   9  -1  336.87   14.00
  -5   9  -1  348.57   16.00
  -5   9  -1  329.97   15.40
  -5   9  -1  337.37   13.60
  -6  -9  -1   10.90    1.40
  -6  -9  -1    6.70    2.40
   6  -9   1   14.90    1.40
  -6   9  -1    7.90    2.60
  -6   9  -1   13.60    2.60
  -6   9  -1   14.60    2.20
  -6   9  -1   10.50    1.40
  -7  -9  -1  732.13   34.70
  -7   9  -1  834.42   33.50
  -7   9  -1  785.42   30.50
  -7   9  -1  821.82   29.50
  -7   9  -1  764.32   33.60
  -7   9  -1  817.42   34.80
  -7   9  -1  772.42   30.00
   8  -9   1    6.50    1.00
  -8  -9  -1    5.20    2.50
  -8   9  -1    7.50    2.90
  -8   9  -1    9.00    2.30
  -8   9  -1    8.00    2.30
  -8   9  -1    5.50    1.20
  -8   9  -1    7.40    2.30
  -9  -9  -1  186.38    6.70
  -9  -9  -1  188.78    6.30
  -9  -9  -1  151.28   10.70
  -9   9  -1  202.58   10.40
  -9   9  -1  183.28    7.80
  -9   9  -1  188.98   11.20
  -9   9  -1  188.48    9.80
  -9   9  -1  190.98    6.40
 -10  -9  -1   10.90    1.60
 -10  -9  -1    8.90    0.90
 -10  -9  -1   11.00    1.40
 -10  -9  -1    8.40    0.80
 -10  -9  -1    9.80    0.80
 -10  -9  -1    9.80    1.00
 -10   9  -1    6.20    2.60
 -10   9  -1    6.10    2.40
 -10   9  -1    9.80    0.90
 -10   9  -1   11.80    1.40
 -11  -9  -1   99.89    3.80
 -11  -9  -1   95.99    5.00
 -11  -9  -1  103.09    3.70
 -11  -9  -1  103.29    4.00
 -11  -9  -1  103.69    3.50
 -11  -9  -1  106.79    4.60
 -11   9  -1   96.59    6.80
  11   9   1  101.89    3.80
 -11   9  -1  104.89    3.90
 -12  -9  -1    0.00    1.00
 -12  -9  -1   -0.50    0.50
 -12  -9  -1    0.80    0.50
 -12  -9  -1    0.60    0.60
 -12  -9  -1   -0.10    0.30
 -12  -9  -1    1.10    0.60
 -12  -9  -1   -0.10    0.50
 -12   9  -1    0.50    2.00
 -12   9  -1   -0.60    0.70
  12   9   1    0.50    0.60
 -13  -9  -1   69.39    2.70
 -13  -9  -1   68.09    2.80
 -13  -9  -1   77.39    4.00
 -13   9  -1   72.99    2.90
 -13   9  -1   73.39    5.70
  13   9   1   71.59    2.80
 -14  -9  -1    0.40    1.00
 -14  -9  -1    0.20    0.50
 -14  -9  -1    0.00    0.50
  14   9   1    0.50    0.60
 -14   9  -1    0.40    0.70
 -14   9  -1   -1.60    1.70
 -15  -9  -1   22.70    1.30
 -15  -9  -1   23.50    2.00
 -15  -9  -1   21.90    1.30
 -15   9  -1   21.40    3.20
 -15   9  -1   20.50    1.40
  15   9   1   22.70    1.40
 -16  -9  -1   16.60    1.10
 -16  -9  -1   15.20    1.00
 -16   9  -1   16.10    1.20
 -16   9  -1   15.80    2.70
  16   9   1   15.60    1.20
 -17  -9  -1    5.30    0.60
 -17  -9  -1    4.80    0.60
  17   9   1    5.60    0.60
 -17   9  -1    4.30    0.60
  18   9   1   26.50    1.20
  18   9   1   26.20    1.20
  18  10  -1    0.50    0.40
 -17 -10   1    5.00    0.60
  17  10  -1    6.50    0.60
  17  10  -1    5.20    0.60
 -17  10   1    5.00    0.60
 -16 -10   1    2.10    0.60
  16  10  -1    1.30    0.60
 -16  10   1    2.90    0.70
 -15 -10   1   -0.30    0.60
 -15 -10   1    1.00    1.00
  15  10  -1   -0.60    0.60
 -15  10   1   -0.10    0.60
 -15  10   1   -1.10    1.50
 -14 -10   1  133.29    6.10
 -14 -10   1  130.39    4.70
  14  10  -1  136.79    4.80
 -14  10   1  128.09    4.70
 -14  10   1  133.49    8.00
 -13 -10   1  178.38    6.10
 -13 -10   1  173.38    5.80
 -13 -10   1  187.68    6.80
 -13 -10   1  168.98    6.70
 -13 -10   1  178.08    7.70
 -13  10   1  177.78    6.20
  13  10  -1  177.38    6.20
 -13  10   1  158.08    9.80
 -12 -10   1   79.99    4.50
 -12 -10   1   87.09    3.30
 -12 -10   1   82.29    4.10
 -12 -10   1   84.99    3.00
 -12  10   1   88.79    6.20
 -12  10   1   88.89    4.40
  12  10  -1   89.09    3.30
 -12  10   1   88.09    3.40
 -11 -10   1  395.36   14.20
 -11 -10   1  422.26   13.10
 -11 -10   1  407.46   13.90
 -11 -10   1  417.76   13.40
 -11  10   1  401.16   16.10
  11  10  -1  405.46   13.60
 -11  10   1  375.56   19.30
 -11  10   1  409.16   13.50
 -10 -10   1    0.70    0.60
 -10 -10   1    0.30    0.50
 -10 -10   1    0.40    0.50
 -10 -10   1    0.70    0.50
 -10  10   1    0.00    0.90
  10  10  -1    0.00    0.60
 -10  10   1   -1.70    1.70
 -10  10   1    1.30    0.70
  -9 -10   1   28.60    1.50
  -9 -10   1   29.30    1.50
  -9 -10   1   27.10    4.50
  -9  10   1   30.30    2.50
  -9  10   1   35.10    3.80
  -9  10   1   28.60    4.80
  -8 -10   1  323.17   10.50
  -8 -10   1  290.87   16.10
  -8  10   1  330.47   16.10
  -8  10   1  306.77   15.30
  -8  10   1  321.27   12.90
  -7 -10   1  288.37   16.30
  -7 -10   1  332.47   16.10
  -7  10   1  327.87   16.00
  -7  10   1  336.47   13.30
  -6 -10   1  408.06   21.20
  -6 -10   1  404.56   20.40
  -6  10   1  455.55   19.70
  -6  10   1  457.55   17.10
  -6  10   1  419.86   19.10
  -5 -10   1  683.03   30.90
  -5  10   1  697.13   24.50
  -5  10   1  720.33   29.30
  -5  10   1  695.83   26.70
  -5  10   1  664.23   24.50
  -4 -10   1  216.48   11.70
  -4  10   1  207.48    9.20
  -4  10   1  216.78    8.30
  -4  10   1  232.48   11.30
  -3 -10   1   66.99    5.30
  -3  10   1   55.39    3.60
  -3  10   1   75.99    5.40
   2 -10  -1  488.55   21.10
  -2 -10   1  496.35   21.80
  -2  10   1  474.95   20.50
   2  10  -1  455.85   20.40
   2  10  -1  472.15   20.60
  -2  10   1  469.85   18.60
  -2  10   1  450.85   19.50
   2  10  -1  469.55   20.30
   1 -10  -1    4.20    1.80
  -1 -10   1    7.00    2.20
   1  10  -1    5.50    1.50
   1  10  -1    3.00    1.60
   1  10  -1    2.70    1.90
  -1  10   1    4.80    1.30
   1  10  -1    1.80    1.50
  -1  10   1    3.50    1.40
  -1  10   1    6.10    1.40
  -1  10   1    5.80    2.10
   1  10  -1    5.20    1.60
  -1  10   1    5.00    1.10
   1  10  -1    5.50    0.80
   0 -10   1   12.70    2.40
   0 -10  -1   14.80    2.60
   0  10  -1   10.90    1.90
   0  10  -1   10.60    2.60
   0  10  -1   10.90    2.00
   0  10   1    8.30    2.00
   0  10  -1    9.70    1.50
   0  10   1   10.00    2.50
   0  10   1   12.50    2.10
   0  10   1    9.00    1.30
   0  10   1    9.60    2.00
   0  10  -1    9.40    1.40
   0  10  -1   10.20    1.70
   1 -10   1   13.30    2.50
  -1 -10  -1   13.70    2.60
  -1  10  -1   23.70    3.30
   1  10   1   10.20    2.30
  -1  10  -1   12.70    1.70
  -1  10  -1   16.10    2.20
   1  10   1   17.70    2.90
  -1  10  -1   12.60    1.80
   2 -10   1  373.06   17.40
  -2 -10  -1  387.16   17.90
  -2  10  -1  395.06   16.80
  -2  10  -1  381.46   17.10
  -2  10  -1  356.46   15.10
   2  10   1  367.16   16.50
   3 -10   1  228.28   11.00
  -3 -10  -1  232.88   11.60
  -3  10  -1  208.18    9.10
  -3  10  -1  205.58   10.20
  -3  10  -1  214.68   11.10
  -3  10  -1  209.28    8.20
   3  10   1  216.48   10.50
  -4 -10  -1  291.87   14.60
  -4  10  -1  304.97   14.20
  -4  10  -1  283.37   10.50
  -4  10  -1  283.67   11.80
  -4  10  -1  283.87   13.30
  -4  10  -1  284.87   10.40
  -5 -10  -1  186.38   10.80
  -5 -10  -1  183.88   10.10
  -5  10  -1  194.08    8.20
  -5  10  -1  187.08   10.50
  -5  10  -1  199.38    9.50
  -6 -10  -1   24.50    4.00
  -6 -10  -1   32.80    2.40
  -6  10  -1   35.10    3.20
  -6  10  -1   37.90    4.60
  -6  10  -1   32.10    2.40
  -7 -10  -1   27.10    4.50
  -7  10  -1   40.80    2.70
  -7  10  -1   44.70    4.10
  -7  10  -1   30.50    4.50
  -7  10  -1   38.20    3.50
  -8 -10  -1    0.40    2.10
  -8 -10  -1    0.80    0.50
  -8 -10  -1    0.20    0.50
  -8 -10  -1    1.30    0.50
  -8  10  -1   -0.30    0.60
  -8  10  -1    0.20    2.30
  -8  10  -1    1.90    1.90
  -8  10  -1   -0.70    0.80
  -9 -10  -1   48.90    2.20
  -9 -10  -1   50.39    2.20
  -9 -10  -1   52.09    2.10
  -9 -10  -1   44.90    5.50
  -9 -10  -1   50.19    2.00
  -9  10  -1   49.10    2.20
  -9  10  -1   58.69    5.00
  -9  10  -1   50.39    3.00
 -10 -10  -1  189.28    6.50
 -10 -10  -1  194.78    6.30
 -10 -10  -1  195.38    6.90
 -10 -10  -1  184.88    6.70
 -10  10  -1  181.18    8.00
  10  10   1  188.18    6.60
 -10  10  -1  192.48   10.60
 -10  10  -1  188.48    6.60
 -11 -10  -1  163.28    5.90
 -11 -10  -1  165.18    5.70
 -11 -10  -1  169.98    6.10
 -11 -10  -1  168.08    5.50
 -11 -10  -1  149.69    7.20
 -11 -10  -1  167.68    6.80
 -11  10  -1  153.58    9.50
 -11  10  -1  172.48    5.80
  11  10   1  163.08    5.80
 -11  10  -1  162.18    7.00
 -12 -10  -1  140.09    6.70
 -12 -10  -1  148.39    6.00
 -12 -10  -1  153.18    5.70
 -12 -10  -1  158.08    5.30
 -12 -10  -1  157.08    5.30
 -12 -10  -1  143.39    5.90
 -12 -10  -1  153.08    5.00
 -12  10  -1  161.98    9.30
  12  10   1  156.88    5.40
 -12  10  -1  154.68    5.50
 -13 -10  -1    9.60    0.50
 -13 -10  -1   11.40    1.00
 -13 -10  -1   10.10    1.70
 -13 -10  -1    8.50    0.80
 -13  10  -1   10.70    2.80
  13  10   1   12.20    1.20
 -13  10  -1    9.60    1.00
 -14 -10  -1  208.18    6.90
 -14 -10  -1  203.18    8.50
 -14 -10  -1  205.08    7.00
 -14  10  -1  220.68   11.30
 -14  10  -1  196.58    7.10
  14  10   1  210.98    7.10
 -15 -10  -1   45.60    1.90
 -15 -10  -1   39.00    1.80
 -15  10  -1   43.60    2.00
 -15  10  -1   37.80    3.90
  15  10   1   43.80    1.90
 -16 -10  -1    2.00    0.50
 -16 -10  -1    2.80    0.50
  16  10   1    2.80    0.60
 -17 -10  -1    1.00    0.40
 -17 -10  -1    0.30    0.40
  17  10   1    1.20    0.50
  17  10   1    1.00    0.50
  17  11  -1    0.40    0.50
 -16 -11   1    5.50    0.70
  16  11  -1    3.70    0.60
  16  11  -1    4.70    0.60
 -15 -11   1   32.50    1.60
 -15  11   1   29.40    1.50
 -15  11   1   25.90    3.30
  15  11  -1   29.70    1.50
 -14 -11   1    5.20    1.40
 -14 -11   1    6.20    0.80
 -14  11   1    4.20    0.70
 -14  11   1    8.50    2.30
  14  11  -1    4.00    0.70
 -13 -11   1   21.60    1.10
 -13 -11   1   23.70    1.60
 -13 -11   1   23.40    1.40
 -13 -11   1   24.80    1.50
 -13 -11   1   22.40    2.40
 -13  11   1   24.80    1.50
 -13  11   1   23.30    3.40
  13  11  -1   21.40    1.50
 -12 -11   1   30.40    1.60
 -12 -11   1   29.60    1.30
 -12 -11   1   28.20    2.10
 -12  11   1   26.10    1.60
 -12  11   1   31.10    4.00
 -12  11   1   29.00    2.40
  12  11  -1   27.40    1.60
 -11 -11   1   21.00    1.20
 -11 -11   1   21.20    1.40
 -11 -11   1   21.80    1.30
 -11  11   1   19.70    1.40
 -11  11   1   18.80    2.10
 -11  11   1   16.20    3.20
  11  11  -1   21.50    1.50
 -10 -11   1  467.95   15.00
 -10 -11   1  470.55   15.60
 -10 -11   1  466.95   14.70
 -10  11   1  414.86   21.40
  10  11  -1  468.75   15.30
 -10  11   1  435.66   18.20
  -9 -11   1   57.09    2.40
  -9 -11   1   56.69    2.40
   9  11  -1   57.19    2.40
  -9  11   1   55.79    4.80
  -9  11   1   50.09    3.40
  -8 -11   1  301.07    9.80
  -8 -11   1  307.37   10.30
  -8 -11   1  267.67   15.60
  -8  11   1  275.07   15.30
  -8  11   1  290.67   14.60
  -8  11   1  298.97   12.30
  -7 -11   1   29.90    1.50
  -7 -11   1   30.80    1.60
  -7 -11   1   22.30    4.10
  -7 -11   1   32.20    2.40
  -7  11   1   34.40    4.80
  -7  11   1   32.50    2.60
  -6 -11   1   75.39    4.70
  -6 -11   1   70.69    6.20
  -6  11   1   69.39    4.10
  -6  11   1   79.89    6.40
  -5 -11   1    1.60    2.00
  -5  11   1    3.40    0.70
  -5  11   1    1.50    1.20
  -5  11   1    2.40    0.60
  -5  11   1    1.60    2.20
  -4 -11   1  732.23   32.40
   4  11  -1  706.93   30.80
  -4  11   1  714.93   25.90
  -4  11   1  720.43   30.50
  -4  11   1  732.73   28.00
  -3 -11   1   19.60    3.50
  -3  11   1   17.50    1.60
   3  11  -1   21.00    3.40
  -3  11   1   16.10    2.00
   3  11  -1   19.00    2.30
  -3  11   1   25.30    3.80
   3  11  -1   21.70    2.50
   2 -11  -1  137.99    7.70
  -2 -11   1  126.99    8.10
   2  11  -1  113.79    7.30
  -2  11   1  130.29    6.30
  -2  11   1  124.09    6.20
   2  11  -1  126.39    7.70
   2  11  -1  146.79    6.80
   2  11  -1  111.19    6.70
  -2  11   1  129.19    7.90
   1 -11  -1   60.59    4.80
  -1 -11   1   67.39    5.20
   1  11  -1   55.79    4.30
  -1  11   1   62.89    4.10
  -1  11   1   60.09    4.90
   1  11  -1   56.99    4.30
  -1  11   1   59.79    3.70
   1  11  -1   53.59    3.90
   1  11  -1   57.19    4.90
   1  11  -1   50.79    3.80
   0 -11  -1  225.08   11.10
   0 -11   1  213.68   11.00
   0  11   1  201.98   10.00
   0  11  -1  198.28    9.70
   0  11   1  185.88   10.70
   0  11  -1  205.68    8.90
   0  11  -1  189.28   10.50
   0  11   1  196.68    8.90
   0  11  -1  203.28    9.60
   0  11   1  206.08   10.40
   0  11   1  198.88   10.40
  -1 -11  -1   82.89    5.80
   1 -11   1   75.29    5.50
  -1  11  -1   78.79    4.20
  -1  11  -1   74.19    5.70
   1  11   1   73.59    5.20
   1  11   1   72.99    5.50
  -1  11  -1   65.79    4.40
  -1  11  -1   63.59    3.90
   2 -11   1   -0.40    1.40
  -2 -11  -1    0.10    1.80
  -2  11  -1    1.00    1.10
   2  11   1    1.00    1.80
   2  11   1    1.70    1.30
  -2  11  -1    1.40    1.40
  -2  11  -1    0.20    1.90
  -2  11  -1    1.20    0.70
   3 -11   1   37.20    3.70
  -3 -11  -1   40.30    4.30
  -3  11  -1   27.40    4.00
  -3  11  -1   34.00    2.80
  -3  11  -1   31.30    3.10
  -3  11  -1   38.10    2.10
  -4 -11  -1   24.70    3.90
  -4  11  -1   30.70    1.60
  -4  11  -1   24.80    2.90
  -4  11  -1   33.90    2.70
  -4  11  -1   32.40    1.60
  -4  11  -1   37.20    4.40
  -5 -11  -1   77.19    4.90
  -5 -11  -1   80.99    6.40
  -5  11  -1   79.99    4.30
  -5  11  -1   83.29    6.60
  -5  11  -1   79.69    5.20
  -6 -11  -1  962.00   45.30
  -6 -11  -1  890.81   41.50
  -6  11  -1  971.60   39.60
  -6  11  -1  948.61   36.10
  -6  11  -1  936.11   40.20
  -7 -11  -1    2.80    0.70
  -7 -11  -1    4.00    2.40
  -7 -11  -1    2.90    0.60
  -7 -11  -1    2.50    0.60
  -7  11  -1    3.00    1.90
  -7  11  -1    2.30    2.60
  -7  11  -1    3.60    1.20
  -7  11  -1    2.20    1.70
  -8 -11  -1  158.48    5.50
  -8 -11  -1  139.59   10.10
  -8 -11  -1  158.48    5.80
  -8 -11  -1  155.08    5.90
  -8 -11  -1  165.48    5.80
  -8  11  -1  150.88    7.10
  -8  11  -1  186.78    9.60
   8  11   1  164.18    5.60
  -8  11  -1  154.68    5.60
  -9 -11  -1   34.50    1.70
  -9 -11  -1   33.00    1.70
  -9 -11  -1   29.90    1.50
  -9 -11  -1   30.70    1.60
  -9  11  -1   31.80    2.50
  -9  11  -1   31.30    4.30
  -9  11  -1   33.90    1.70
   9  11   1   34.10    1.70
 -10 -11  -1    4.00    0.60
 -10 -11  -1    2.60    0.60
 -10 -11  -1    2.90    0.70
 -10 -11  -1    4.30    0.70
 -10  11  -1    3.20    0.80
 -10  11  -1    4.00    1.20
  10  11   1    2.30    0.70
 -10  11  -1    5.30    2.50
 -11 -11  -1    0.30    0.60
 -11 -11  -1    1.40    0.40
 -11 -11  -1    1.20    0.50
 -11 -11  -1    1.00    0.60
 -11 -11  -1    1.50    0.90
  11  11   1    0.00    0.60
 -11  11  -1    2.30    0.70
 -11  11  -1    0.70    1.00
 -11  11  -1    2.50    2.20
 -12 -11  -1   66.39    2.40
 -12 -11  -1   68.09    2.60
 -12 -11  -1   67.49    3.10
 -12 -11  -1   69.29    2.70
 -12 -11  -1   61.49    3.10
 -12 -11  -1   70.59    4.00
  12  11   1   67.39    2.70
 -12  11  -1   66.19    5.60
 -12  11  -1   71.39    2.80
 -13 -11  -1   28.00    1.10
 -13 -11  -1   31.00    1.40
 -13 -11  -1   27.10    1.50
 -13 -11  -1   29.70    2.50
  13  11   1   30.50    1.60
 -13  11  -1   28.90    1.60
 -13  11  -1   24.70    3.70
 -14 -11  -1  100.19    5.20
 -14 -11  -1  107.19    3.80
 -14 -11  -1  114.39    3.90
  14  11   1  106.39    3.90
 -14  11  -1  104.19    6.90
 -15 -11  -1   29.00    1.40
 -15 -11  -1   29.30    1.50
  15  11   1   28.60    1.50
 -16 -11  -1    1.00    0.50
  16  11   1    1.60    0.50
  17  11   1    4.80    0.50
  17  11   1    3.90    0.50
 -16 -12   1   16.20    1.00
  16  12  -1   15.00    1.00
 -15 -12   1  101.29    3.60
  15  12  -1   99.39    3.60
  15  12  -1  100.39    3.60
 -14 -12   1   14.30    1.10
 -14  12   1   10.80    2.40
  14  12  -1   14.20    1.10
 -13 -12   1  142.19    4.80
 -13 -12   1  146.09    5.60
 -13 -12   1  141.29    5.10
 -13 -12   1  153.88    5.50
 -13  12   1  126.09    8.30
  13  12  -1  149.99    5.20
 -12 -12   1   92.49    3.50
 -12 -12   1   92.49    4.30
 -12 -12   1   94.29    3.20
 -12  12   1   92.59    4.60
  12  12  -1   91.49    3.50
 -12  12   1   88.39    6.40
 -11 -12   1    4.70    0.60
 -11 -12   1    5.30    0.80
 -11 -12   1    4.90    0.70
  11  12  -1    4.00    0.70
 -11  12   1    4.60    2.40
 -11  12   1    4.80    1.40
 -10 -12   1   79.99    3.20
 -10 -12   1   79.29    3.10
 -10 -12   1   81.99    3.00
 -10  12   1   82.79    4.50
  10  12  -1   77.59    3.10
 -10  12   1   78.69    6.10
  -9 -12   1    3.20    0.70
  -9 -12   1    4.00    0.70
   9  12  -1    3.30    0.70
  -9  12   1    4.10    1.40
  -9  12   1    4.20    2.30
  -8 -12   1   30.10    1.60
  -8 -12   1   28.60    1.70
  -8  12   1   29.50    3.80
   8  12  -1   29.30    1.60
  -8  12   1   27.10    2.70
  -7 -12   1  127.99    6.60
  -7 -12   1  105.59    8.60
  -7 -12   1  121.69    4.60
   7  12  -1  116.19    4.40
  -7  12   1  142.89    7.90
  -7  12   1  120.09    6.10
  -6 -12   1   92.49    3.60
  -6 -12   1   83.49    3.40
  -6 -12   1   89.09    5.40
  -6 -12   1   80.89    7.10
  -6  12   1   89.29    5.00
  -6  12   1   82.89    7.00
  -5 -12   1  685.13   31.10
  -5  12   1  711.53   26.60
   5  12  -1  664.93   29.20
   5  12  -1  672.33   25.50
   5  12  -1  666.03   28.90
  -5  12   1  666.53   29.40
  -5  12   1  674.93   23.90
  -5  12   1  680.73   23.90
  -5  12   1  662.43   21.40
  -4 -12   1   55.59    5.50
  -4  12   1   45.50    3.40
  -4  12   1   45.00    2.50
   4  12  -1   50.49    5.20
   4  12  -1   48.20    2.00
   4  12  -1   49.30    3.60
   4  12  -1   42.30    3.60
  -4  12   1   49.10    5.30
  -3 -12   1  195.88   10.80
  -3  12   1  170.98    7.00
   3  12  -1  175.68   10.00
   3  12  -1  171.58    9.00
  -3  12   1  184.38    8.20
  -3  12   1  182.28   10.20
   3  12  -1  158.68    8.70
  -2 -12   1    5.00    2.40
   2 -12  -1    1.90    1.90
   2  12  -1    2.40    1.50
   2  12  -1   -1.40    1.30
  -2  12   1    2.60    0.90
  -2  12   1    2.90    2.20
   2  12  -1    2.40    1.80
   2  12  -1    3.60    1.70
   2  12  -1    3.20    2.20
  -2  12   1    2.50    1.30
   1 -12  -1    3.80    2.10
  -1 -12   1    4.80    2.20
  -1  12   1    4.70    1.50
   1  12  -1    3.50    1.60
  -1  12   1    2.90    2.30
   1  12  -1    2.60    1.60
  -1  12   1    2.20    1.40
   1  12  -1    4.30    1.10
   1  12  -1    3.20    1.00
   1  12  -1    3.40    2.40
   0 -12   1    4.10    2.10
   0 -12  -1    3.70    2.20
   0  12  -1    4.10    1.60
   0  12   1    2.90    2.10
   0  12   1    0.40    1.30
   0  12  -1    1.30    2.10
   0  12   1    1.90    1.10
   0  12   1    1.60    1.00
   0  12   1    2.70    1.60
   0  12  -1    3.30    1.30
   1 -12   1  101.39    6.80
  -1 -12  -1  101.39    6.90
  -1  12  -1   88.99    4.50
  -1  12  -1  102.99    5.20
   1  12   1  101.09    6.80
  -1  12  -1   80.89    5.40
   1  12   1   90.09    6.60
   1  12   1  101.39    6.30
  -1  12  -1   99.99    7.00
   1  12   1   93.59    6.20
   2 -12   1   57.29    5.10
  -2 -12  -1   50.09    5.20
  -2  12  -1   51.69    3.60
  -2  12  -1   48.60    5.40
  -2  12  -1   54.09    2.90
  -2  12  -1   54.39    4.00
   2  12   1   58.19    3.70
  -3 -12  -1  629.94   28.50
   3  12   1  621.14   30.40
  -3  12  -1  631.74   24.40
  -3  12  -1  607.34   27.10
  -3  12  -1  603.44   26.90
  -3  12  -1  614.94   22.30
  -4 -12  -1  143.09    9.20
  -4  12  -1  151.18    6.90
  -4  12  -1  120.89    7.50
  -4  12  -1  126.99    8.90
  -4  12  -1  146.69    5.20
  -5 -12  -1  315.67   16.00
  -5 -12  -1  309.87   11.90
  -5 -12  -1  327.27   16.70
  -5 -12  -1  301.37   10.80
  -5  12  -1  293.07   15.80
  -5  12  -1  326.17   14.90
  -5  12  -1  321.17   13.10
  -6 -12  -1   77.19    4.40
  -6 -12  -1   74.99    3.20
  -6 -12  -1   72.59    3.00
  -6 -12  -1   72.19    6.60
  -6  12  -1   75.99    4.40
  -6  12  -1   79.99    5.20
  -7 -12  -1   16.20    1.40
  -7 -12  -1   15.10    1.30
  -7 -12  -1   15.10    1.20
  -7  12  -1   16.20    2.70
  -7  12  -1   15.80    2.10
   7  12   1   13.30    1.20
  -7  12  -1   14.60    3.00
  -8 -12  -1   52.99    2.50
  -8 -12  -1   56.39    2.30
  -8 -12  -1   59.29    2.50
  -8  12  -1   51.59    3.50
   8  12   1   55.29    2.30
  -8  12  -1   56.79    5.20
  -9 -12  -1  177.68    6.50
  -9 -12  -1  178.58    6.20
  -9 -12  -1  178.08    6.00
  -9 -12  -1  181.58    6.50
  -9  12  -1  182.68    8.00
   9  12   1  182.88    6.30
  -9  12  -1  180.98   10.40
 -10 -12  -1  283.77   10.20
 -10 -12  -1  286.57    9.40
 -10 -12  -1  286.27   10.00
 -10 -12  -1  291.57    9.60
 -10  12  -1  274.97   11.70
 -10  12  -1  298.97   14.90
  10  12   1  289.67    9.80
 -11 -12  -1  110.99    4.10
 -11 -12  -1  110.49    4.20
 -11 -12  -1  112.49    5.10
 -11 -12  -1  113.19    4.30
 -11 -12  -1  117.99    3.90
 -11  12  -1  123.39    7.70
  11  12   1  116.89    4.20
 -12 -12  -1    7.70    1.00
 -12 -12  -1    8.40    1.00
 -12 -12  -1    6.50    0.70
 -12 -12  -1    7.70    0.80
  12  12   1    7.00    0.80
 -12  12  -1    6.80    2.40
 -13 -12  -1  117.19    4.30
 -13  12  -1  128.39    7.70
  13  12   1  119.49    4.30
 -14 -12  -1   11.10    1.00
 -14  12  -1    7.70    2.20
  14  12   1    7.20    0.80
 -15 -12  -1   62.09    2.50
  15  12   1   69.79    2.50
  16  12   1   25.00    1.20
  16  12   1   23.20    1.20
  16  13  -1    3.90    0.50
 -15 -13   1    0.50    0.50
  15  13  -1   -0.50    0.50
  15  13  -1    0.80    0.50
 -14 -13   1   54.99    2.20
  14  13  -1   52.79    2.20
  14  13  -1   53.99    2.20
 -13 -13   1    1.10    0.40
 -13 -13   1   -0.40    0.50
  13  13  -1    0.20    0.60
 -13  13   1    0.70    1.80
 -12 -13   1   21.90    1.10
 -12 -13   1   21.50    1.40
 -12 -13   1   23.80    1.90
 -12  13   1   21.20    3.40
  12  13  -1   22.50    1.40
 -11 -13   1  154.98    5.70
 -11 -13   1  160.48    5.50
 -11 -13   1  159.18    5.30
 -11  13   1  150.68    7.10
 -11  13   1  172.28    9.30
  11  13  -1  154.78    5.60
 -10 -13   1   14.00    1.20
 -10 -13   1   13.60    1.20
 -10 -13   1   11.60    1.00
  10  13  -1   12.80    1.20
 -10  13   1   13.50    3.10
 -10  13   1   13.00    1.90
  -9 -13   1  227.18    7.80
  -9 -13   1  212.18    7.40
  -9  13   1  215.28    9.60
  -9  13   1  231.08   12.00
   9  13  -1  210.58    7.50
  -8 -13   1   38.70    1.90
   8  13  -1   37.10    1.80
  -8  13   1   36.70    4.30
  -8  13   1   34.90    3.10
  -7 -13   1  144.29    5.10
  -7 -13   1  135.59    7.00
  -7 -13   1  134.29    7.20
   7  13  -1  136.29    5.40
   7  13  -1  132.19    4.80
  -7  13   1  133.69    8.30
  -7  13   1  129.99    6.70
  -6 -13   1   38.60    1.80
  -6 -13   1   36.60    1.90
  -6 -13   1   42.90    3.20
   6  13  -1   39.10    1.80
  -6  13   1   40.20    3.30
   6  13  -1   42.90    3.60
  -5 -13   1   35.80    1.90
  -5 -13   1   35.70    1.70
  -5  13   1   45.00    3.40
   5  13  -1   38.90    3.20
   5  13  -1   35.10    1.60
   5  13  -1   40.00    1.60
  -5  13   1   38.80    1.40
  -4 -13   1    9.80    1.00
  -4 -13   1   10.00    3.10
  -4  13   1   12.50    2.20
  -4  13   1   11.80    3.20
  -4  13   1   11.70    1.20
  -4  13   1   11.50    0.80
  -4  13   1   10.50    1.20
   4  13  -1    9.30    3.20
  -3 -13   1   12.80    3.60
  -3  13   1    7.10    1.20
  -3  13   1    8.20    0.80
   3  13  -1    5.50    2.80
  -3  13   1   10.90    2.00
  -3  13   1    6.10    2.70
  -2 -13   1   24.20    4.10
  -2  13   1   23.20    1.20
  -2  13   1   17.60    2.40
  -2  13   1   24.50    4.20
   2  13  -1   19.70    3.90
  -1 -13   1  491.85   22.30
   1 -13  -1  448.36   21.70
  -1  13   1  465.45   14.80
   1  13  -1  418.96   20.90
  -1  13   1  453.65   21.10
  -1  13   1  480.45   18.90
   0 -13  -1   58.59    5.40
   0 -13   1   60.49    5.60
   0  13  -1   61.09    2.30
   0  13  -1   43.90    5.30
  -1 -13  -1  219.08   11.90
   1 -13   1  221.08   11.80
  -1  13  -1  214.38    6.80
  -1  13  -1  181.28   10.20
  -1  13  -1  200.58   11.70
  -2 -13  -1   42.90    4.90
  -2  13  -1   36.10    3.60
  -2  13  -1   36.80    5.10
  -2  13  -1   36.70    1.50
  -2  13  -1   39.50    2.50
  -3 -13  -1    4.20    2.60
  -3 -13  -1    1.60    0.70
   3  13   1    1.20    1.20
  -3  13  -1    2.10    0.80
  -3  13  -1    3.50    2.70
  -3  13  -1    3.90    0.50
  -3  13  -1    2.50    1.90
  -3  13  -1    2.30    0.80
  -3  13  -1    2.30    1.50
  -4 -13  -1  316.37   11.10
  -4 -13  -1  332.37   17.10
   4  13   1  321.17   16.40
  -4  13  -1  318.67   15.10
  -4  13  -1  309.97   10.20
  -4  13  -1  319.97   13.50
   4  13   1  324.17   12.10
  -5 -13  -1  143.99    5.30
  -5 -13  -1  137.59    7.70
  -5 -13  -1  137.79    5.10
  -5 -13  -1  137.09    5.40
  -5  13  -1  136.99    7.80
  -5  13  -1  133.29    6.70
   5  13   1  136.79    5.40
  -6 -13  -1    5.50    0.90
  -6 -13  -1    4.00    0.90
  -6 -13  -1    4.20    0.80
   6  13   1    3.30    0.70
  -6  13  -1    4.00    1.50
  -6  13  -1    2.80    1.90
   6  13   1    3.60    0.60
  -6  13  -1    5.50    2.50
  -7 -13  -1  129.99    4.70
  -7 -13  -1  125.89    4.90
  -7  13  -1  125.19    6.30
   7  13   1  129.19    4.60
  -7  13  -1  116.09    7.90
  -8 -13  -1   24.50    1.40
  -8 -13  -1   23.10    1.50
  -8 -13  -1   24.80    1.60
  -8  13  -1   20.50    3.50
   8  13   1   23.60    1.40
  -8  13  -1   22.90    2.50
  -9 -13  -1   58.89    2.40
  -9 -13  -1   58.09    2.20
  -9 -13  -1   57.49    2.50
   9  13   1   52.39    2.40
  -9  13  -1   59.39    5.30
 -10 -13  -1    7.60    0.70
 -10 -13  -1    7.50    0.80
 -10 -13  -1    8.70    0.80
 -10  13  -1   10.00    2.70
  10  13   1    8.10    0.80
 -11 -13  -1   -0.20    0.40
 -11 -13  -1   -0.70    0.50
 -11 -13  -1   -0.10    0.50
 -11 -13  -1   -0.40    0.80
  11  13   1   -1.30    0.60
 -11  13  -1    1.50    2.00
 -12 -13  -1    9.70    1.00
 -12 -13  -1   12.60    1.00
 -12 -13  -1   11.20    0.70
 -12 -13  -1   12.70    1.20
  12  13   1    8.60    0.90
 -12  13  -1    9.30    2.50
 -13 -13  -1   68.09    2.60
 -13  13  -1   57.59    4.90
  13  13   1   63.89    2.50
 -14 -13  -1   11.40    1.00
  14  13   1   13.00    1.00
  15  13   1   38.20    1.60
  15  13   1   36.80    1.60
 -14 -14   1   31.90    1.50
  14  14  -1   32.10    1.40
 -13 -14   1   33.00    1.20
 -13 -14   1   30.90    1.50
  13  14  -1   31.80    1.50
  13  14  -1   33.20    1.50
  13  14  -1   28.80    1.50
 -12 -14   1   24.00    1.80
 -12 -14   1   22.50    1.40
 -12 -14   1   25.00    1.10
  12  14  -1   22.90    1.30
 -12  14   1   20.70    3.10
  12  14  -1   24.00    1.40
  12  14  -1   25.40    1.30
 -11 -14   1    1.10    0.60
 -11 -14   1   -0.20    0.60
 -11 -14   1    0.50    0.40
  11  14  -1    0.00    0.50
 -11  14   1   -0.60    1.70
  11  14  -1    0.60    0.50
 -10 -14   1   42.90    2.10
 -10 -14   1   45.10    1.90
  10  14  -1   45.30    2.00
 -10  14   1   48.60    4.70
 -10  14   1   48.00    3.20
  10  14  -1   45.70    2.00
  -9 -14   1   21.90    1.40
   9  14  -1   17.60    1.30
   9  14  -1   18.20    1.10
  -9  14   1   19.80    3.40
  -9  14   1   16.90    2.20
  -8 -14   1   60.49    2.60
  -8  14   1   70.09    5.50
   8  14  -1   58.79    2.50
  -8  14   1   55.89    3.90
   8  14  -1   58.09    4.30
  -7 -14   1   47.90    2.20
  -7  14   1   39.50    3.40
   7  14  -1   42.90    3.50
  -7  14   1   47.30    4.70
  -6 -14   1   82.59    3.20
  -6 -14   1   76.89    4.80
   6  14  -1   72.99    4.70
  -6  14   1   78.29    4.70
   5 -14  -1   54.59    2.30
  -5 -14   1   51.19    2.50
  -5 -14   1   55.19    2.40
  -5 -14   1   54.39    2.40
  -5 -14   1   50.99    2.30
  -5  14   1   55.89    4.00
  -4 -14   1   36.50    1.90
  -4 -14   1   37.00    1.70
   4 -14  -1   35.90    1.80
  -4  14   1   37.70    1.90
  -4  14   1   36.60    1.50
  -4  14   1   39.20    2.00
  -4  14   1   30.10    3.20
   3 -14  -1    2.70    0.60
  -3 -14   1    0.70    0.60
  -3  14   1    0.30    1.40
  -3  14   1    2.10    0.50
  -3  14   1    2.70    1.00
   2 -14  -1  325.87   10.90
  -2 -14   1  331.87   10.90
  -2  14   1  317.47   12.40
  -2  14   1  318.37   10.40
  -2  14   1  313.07   13.80
  -1 -14   1   52.69    2.30
   1 -14  -1   52.29    2.30
   1  14  -1   52.49    2.10
  -1  14   1   53.09    2.10
   0 -14   1   61.89    2.50
   0 -14  -1   63.79    2.50
   0  14   1   58.19    2.40
   0  14  -1   62.49    2.40
  -1 -14  -1   27.40    1.50
   1 -14   1   26.70    1.50
  -1  14  -1   25.50    1.30
  -1  14  -1   30.50    2.40
   2 -14   1  644.54   21.90
  -2 -14  -1  657.73   21.90
  -2  14  -1  665.33   23.90
  -2  14  -1  667.93   20.90
  -3 -14  -1    3.80    0.80
   3 -14   1    4.30    0.70
  -3 -14  -1    3.60    0.60
  -3  14  -1    4.40    0.80
  -3  14  -1    3.80    0.50
  -3  14  -1    5.10    0.80
  -4 -14  -1  100.19    4.20
  -4 -14  -1  110.39    4.20
  -4 -14  -1  104.49    3.90
  -4 -14  -1  100.39    4.00
   4 -14   1  104.69    3.90
   4  14   1  105.69    5.80
   4  14   1  104.79    5.70
  -5 -14  -1   19.90    1.60
  -5 -14  -1   22.20    2.30
  -5 -14  -1   18.90    1.40
   5  14   1   20.30    2.50
  -6 -14  -1   -0.50    0.70
  -6 -14  -1   -0.70    0.60
   6  14   1   -0.10    1.30
   6  14   1   -0.10    0.40
  -6  14  -1    0.40    2.00
  -7 -14  -1   20.30    1.50
  -7 -14  -1   21.10    1.50
   7  14   1   23.90    1.40
   7  14   1   29.40    3.30
  -7  14  -1   18.70    3.40
   7  14   1   24.50    1.30
  -8 -14  -1    3.40    0.70
  -8 -14  -1    5.20    0.80
   8  14   1    3.40    0.60
   8  14   1    4.00    0.70
  -8  14  -1    4.10    2.50
  -9 -14  -1   37.40    1.60
  -9 -14  -1   38.40    1.80
  -9 -14  -1   36.20    1.80
  -9  14  -1   38.10    4.30
   9  14   1   35.50    1.80
   9  14   1   35.70    1.80
 -10 -14  -1   14.30    1.20
 -10 -14  -1   14.00    1.10
 -10 -14  -1   14.50    1.00
  10  14   1   16.10    1.20
  10  14   1   16.30    1.20
 -10  14  -1   12.00    2.80
 -11 -14  -1    0.40    0.80
 -11 -14  -1    0.50    0.40
 -11 -14  -1    1.30    0.60
 -11 -14  -1    1.00    0.50
  11  14   1    0.50    0.60
  11  14   1    0.10    0.50
 -11  14  -1    0.50    1.90
 -12 -14  -1   99.69    3.20
 -12 -14  -1   98.99    3.50
 -12  14  -1   91.29    6.50
  12  14   1   94.89    3.50
  12  14   1   93.79    3.90
 -13 -14  -1   14.30    1.00
  13  14   1    9.60    1.00
  13  14   1   13.20    0.90
  14  14   1   38.50    1.60
  14  14   1   39.30    1.60
 -12 -15   1    9.20    0.70
 -11 -15   1    4.70    0.50
 -11  15   1    7.00    2.10
  11  15  -1    4.40    1.20
 -10 -15   1   39.30    1.80
 -10 -15   1   35.90    1.60
  10  15  -1   39.50    2.90
 -10  15   1   33.00    3.90
  -9 -15   1   -0.60    0.60
  -9  15   1    4.60    2.20
   9  15  -1    0.00    1.10
  -8 -15   1   52.19    2.40
   8  15  -1   57.69    3.30
   8  15  -1   54.19    3.60
  -8  15   1   49.60    4.90
  -7 -15   1   27.10    1.60
  -7  15   1   30.90    3.00
  -7  15   1   22.70    3.50
   6 -15  -1   47.70    2.10
  -6 -15   1   46.80    2.20
  -6 -15   1   45.90    3.10
  -6  15   1   48.00    4.80
  -6  15   1   43.20    3.60
  -5 -15   1    7.80    1.60
  -5 -15   1    8.50    1.00
   5 -15  -1    9.20    0.90
  -5 -15   1   12.30    1.30
  -5 -15   1    8.40    1.00
  -5  15   1   13.50    2.20
  -4 -15   1   21.40    1.50
  -4 -15   1   20.80    1.30
   4 -15  -1   23.40    1.40
  -4  15   1   21.50    1.00
   3 -15  -1  113.39    4.10
  -3 -15   1  113.29    4.10
  -3  15   1  116.89    3.80
  -3  15   1  107.09    4.70
  -3  15   1  101.19    4.70
   2 -15  -1   26.00    1.50
  -2 -15   1   25.40    1.40
  -2  15   1   24.50    1.20
   2  15  -1   23.70    1.40
  -2  15   1   22.30    2.10
   1 -15  -1   12.00    1.20
  -1 -15   1   13.30    1.20
  -1  15   1   14.90    1.10
   1  15  -1   11.90    1.10
   0 -15   1   37.10    1.80
   0 -15  -1   39.70    1.80
   0  15  -1   38.30    1.70
   1 -15   1   57.79    2.40
  -1 -15  -1   57.49    2.40
  -1  15  -1   60.19    2.20
  -1  15  -1   59.69    3.30
   2 -15   1    0.60    0.60
  -2 -15  -1   -0.40    0.60
  -2  15  -1    1.00    0.50
  -2  15  -1   -0.70    0.80
  -2  15  -1    1.10    0.80
   3 -15   1   75.59    2.90
  -3 -15  -1   72.59    2.90
  -3 -15  -1   76.59    3.10
  -3  15  -1   73.99    2.50
   4 -15   1    0.10    0.50
  -4 -15  -1    0.60    0.70
  -4 -15  -1    0.50    1.00
  -4 -15  -1   -0.70    0.70
  -4 -15  -1   -0.10    0.50
  -5 -15  -1   89.09    5.20
  -5 -15  -1   89.99    3.70
  -5 -15  -1   92.79    3.60
   5 -15   1   89.79    3.40
  -6 -15  -1  145.59    5.60
  -6 -15  -1  151.28    5.50
   6  15   1  141.69    7.60
   6  15   1  156.78    7.80
  -6  15  -1  158.78    9.20
  -7 -15  -1    1.30    0.60
  -7 -15  -1    1.20    0.70
   7  15   1    0.90    1.10
  -7  15  -1    3.60    2.40
  -8 -15  -1  126.49    4.80
  -8 -15  -1  127.49    4.70
  -8  15  -1  124.79    8.00
   8  15   1  122.99    7.00
  -9 -15  -1    5.30    0.70
  -9 -15  -1    3.90    0.60
   9  15   1    5.90    1.50
  -9  15  -1    6.60    2.40
 -10 -15  -1   27.30    1.30
 -10 -15  -1   26.80    1.50
  10  15   1   25.40    2.70
  10  15   1   27.80    1.40
 -10  15  -1   32.20    3.80
 -11 -15  -1    0.60    0.50
 -11 -15  -1    0.30    0.40
  11  15   1   -0.30    0.50
  11  15   1   -0.10    0.50
 -12 -15  -1   16.40    0.70
 -12 -15  -1   17.30    1.10
  12  15   1   16.30    1.00
  12  15   1   16.40    1.00
  13  15   1    9.10    0.80
 -12 -16   1    0.50    0.30
 -11 -16   1   15.20    0.90
 -10 -16   1   14.10    0.90
 -10 -16   1   12.60    1.10
  -9 -16   1   59.69    2.50
  -9  16   1   59.59    4.90
  -8 -16   1   -0.10    0.60
   8 -16  -1    0.70    0.50
  -8  16   1   -0.90    1.80
  -7 -16   1    0.10    0.60
   7 -16  -1    0.30    0.50
  -7  16   1    2.20    1.90
   6 -16  -1    0.20    0.50
  -6 -16   1    0.70    0.60
  -6  16   1    1.00    1.90
  -5 -16   1    4.60    0.80
  -5 -16   1    3.30    1.10
   5 -16  -1    3.90    0.70
  -5 -16   1    3.00    0.70
  -4 -16   1   46.90    2.30
  -4 -16   1   47.30    2.00
  -4 -16   1   48.90    2.20
  -4 -16   1   47.80    2.30
   4 -16  -1   46.40    2.10
   3 -16  -1    7.80    0.80
  -3 -16   1    7.20    0.80
   3  16  -1    8.40    0.80
  -3  16   1    8.70    0.70
   2 -16  -1    7.10    0.80
  -2 -16   1    7.20    0.80
   2  16  -1    6.50    0.70
  -2  16   1    6.10    1.10
  -2  16   1    8.10    0.80
   1 -16  -1   17.60    1.30
  -1 -16   1   20.20    1.30
  -1  16   1   18.50    1.10
  -1  16   1   17.70    2.00
   1  16  -1   18.20    1.20
   0 -16  -1    5.00    0.70
   0 -16   1    5.40    0.70
   0  16  -1    6.50    0.70
   0  16  -1    4.70    1.20
   0  16   1    5.80    0.70
  -1 -16  -1  146.99    5.30
   1 -16   1  150.48    5.30
  -1  16  -1  144.89    6.10
   1  16   1  146.59    5.00
  -1  16  -1  147.79    4.90
  -2 -16  -1   54.29    2.30
   2 -16   1   63.39    2.40
  -2  16  -1   56.19    2.10
   3 -16   1   42.70    2.00
  -3 -16  -1   55.09    2.20
  -3 -16  -1   40.10    2.00
  -3 -16  -1   43.90    2.30
  -3 -16  -1   43.40    2.20
  -4 -16  -1    7.30    0.90
   4 -16   1    6.10    0.80
  -4 -16  -1    7.30    1.40
  -4 -16  -1    6.90    0.90
   5 -16   1    0.70    0.50
  -5 -16  -1    0.60    0.60
  -5 -16  -1    0.50    0.70
  -5  16  -1    2.90    2.10
   6 -16   1    0.90    0.50
  -6 -16  -1    1.20    0.70
  -6 -16  -1    0.10    0.60
  -6  16  -1   -0.50    2.00
  -7 -16  -1   39.30    2.00
  -7 -16  -1   40.50    1.90
  -7  16  -1   45.20    4.60
  -8 -16  -1   -0.60    0.50
  -8 -16  -1   -0.20    0.60
  -8  16  -1    2.20    2.00
  -9 -16  -1   15.60    1.00
  -9 -16  -1   17.30    1.20
  -9  16  -1   16.10    2.80
 -10 -16  -1    8.60    0.90
 -10 -16  -1    9.40    0.70
 -11 -16  -1    0.00    0.30
 -10 -17   1   11.50    0.80
  -9 -17   1   -0.30    0.50
   9 -17  -1    0.10    0.40
  -8 -17   1    1.60    0.60
   8 -17  -1    1.30    0.50
   7 -17  -1    5.20    0.60
  -7 -17   1    4.80    0.70
  -7  17   1    1.90    1.90
   6 -17  -1    1.20    0.50
  -6 -17   1    1.40    0.60
  -6  17   1    0.50    1.80
  -5 -17   1   24.70    1.50
  -5 -17   1   22.40    1.50
   5 -17  -1   24.10    1.40
  -5 -17   1   23.50    1.80
  -5 -17   1   23.70    1.80
  -5  17   1   19.40    3.20
  -4 -17   1   24.80    1.60
   4 -17  -1   24.30    1.40
  -4 -17   1   23.20    1.50
  -4 -17   1   26.50    2.50
   4  17  -1   24.50    1.40
   3 -17  -1    2.70    0.60
  -3 -17   1    2.40    0.60
  -3 -17   1    4.00    0.80
  -3 -17   1    2.30    0.60
   3  17  -1    2.90    0.60
  -2 -17   1   75.89    3.00
   2 -17  -1   81.69    3.10
   2  17  -1   81.69    2.90
  -2  17   1   76.89    2.70
   1 -17  -1   17.40    1.20
  -1 -17   1   17.40    1.20
  -1  17   1   17.20    1.70
   1  17  -1   18.20    1.10
   1  17  -1   18.10    2.00
  -1  17   1   16.70    1.00
   0 -17   1  149.69    5.20
   0 -17  -1  143.19    5.10
   0  17  -1  143.39    4.80
   0  17   1  144.99    4.90
   0  17   1  146.59    6.30
   0  17  -1  143.29    6.00
  -1 -17  -1    8.10    0.80
   1 -17   1    8.00    0.80
  -1  17  -1    9.80    0.70
   1  17   1    7.90    0.70
  -2 -17  -1    4.90    0.60
   2 -17   1    4.90    0.70
  -2 -17  -1    4.10    0.60
  -2 -17  -1    4.30    0.80
   2  17   1    4.40    0.70
   3 -17   1    0.50    0.50
  -3 -17  -1   -0.50    0.60
  -3 -17  -1    1.00    1.00
  -3 -17  -1   -0.30    0.70
   3  17   1    0.60    0.60
  -4 -17  -1   54.99    2.50
  -4 -17  -1   59.29    3.50
  -4 -17  -1   55.39    3.30
   4 -17   1   55.19    2.30
  -4 -17  -1   56.39    2.50
  -4  17  -1   56.89    5.10
   5 -17   1    0.10    0.50
  -5 -17  -1    0.10    0.60
  -5 -17  -1    0.10    0.60
  -5  17  -1    0.40    1.60
   6 -17   1    4.10    0.60
  -6 -17  -1    5.20    0.70
  -6 -17  -1    4.80    0.70
  -6  17  -1    3.80    2.10
   7 -17   1    4.20    0.60
  -7 -17  -1    4.80    0.70
  -7 -17  -1    3.10    0.70
  -7  17  -1    5.00    2.20
  -8 -17  -1   -0.90    0.50
  -9 -17  -1   30.00    1.40
  -9 -17  -1   29.30    1.30
 -10 -17  -1   40.10    1.50
   9 -18  -1    7.10    0.70
  -8 -18   1    1.80    0.60
   8 -18  -1    2.30    0.50
  -7 -18   1   12.10    1.10
   7 -18  -1   15.30    1.00
   6 -18  -1   13.90    1.00
  -6 -18   1   14.10    1.20
  -5 -18   1    0.60    0.60
   5 -18  -1    0.50    0.50
   5  18  -1    1.80    0.60
  -4 -18   1    4.70    0.70
  -4 -18   1    5.80    0.90
   4 -18  -1    5.60    0.70
  -4 -18   1    5.60    0.70
  -4  18   1    6.70    2.10
   4  18  -1    6.30    0.70
  -3 -18   1   16.00    2.00
   3 -18  -1   14.10    1.10
  -3 -18   1   16.10    1.10
  -3 -18   1   15.50    1.30
   3  18  -1   15.90    1.10
  -2 -18   1    9.00    1.00
  -2 -18   1    7.10    0.70
   2 -18  -1    7.70    0.80
  -2 -18   1    8.40    0.90
   2  18  -1    9.30    0.80
   2  18  -1   11.50    1.50
  -1 -18   1   48.30    2.00
   1 -18  -1   47.50    2.00
   1  18  -1   51.59    2.40
   1  18  -1   47.50    1.80
  -1  18   1   47.40    1.70
   1  18  -1   43.80    2.40
   0 -18  -1    4.90    0.70
   0 -18   1    5.70    0.70
   0  18   1    4.70    0.90
   0  18   1    5.00    0.60
   0  18   1    5.90    1.00
   0  18  -1    4.60    0.50
  -1 -18  -1   10.10    1.00
   1 -18   1   12.00    1.00
  -1 -18  -1   10.30    1.00
  -1 -18  -1    9.50    1.10
   1  18   1   11.20    0.90
   1  18   1    9.80    1.40
   2 -18   1   44.20    1.90
  -2 -18  -1   46.90    1.90
  -2 -18  -1   46.30    3.30
  -2 -18  -1   42.20    2.10
   2  18   1   46.00    1.80
   3 -18   1    1.70    0.50
  -3 -18  -1    1.40    0.70
  -3 -18  -1    2.00    0.70
  -3 -18  -1    1.30    0.60
   3  18   1    1.80    0.50
  -3  18  -1    0.20    1.70
  -4 -18  -1    7.70    0.80
  -4 -18  -1    6.50    0.80
   4 -18   1    6.10    0.70
   4  18   1    5.30    0.60
  -5 -18  -1    0.50    0.60
   5 -18   1    1.60    0.50
  -5 -18  -1    0.70    0.60
  -6 -18  -1   45.90    2.00
  -6 -18  -1   50.09    2.00
   6 -18   1   43.40    1.90
   7 -18   1    4.50    0.60
  -7 -18  -1    2.30    0.60
  -8 -18  -1    1.20    0.50
   8 -18   1    1.10    0.40
   7 -19  -1   17.90    1.00
   6 -19  -1    5.20    0.60
  -6 -19   1    4.30    0.60
   6  19  -1    4.20    0.50
   5 -19  -1    6.60    0.60
  -5 -19   1    7.20    0.70
   5  19  -1    5.50    0.60
   4 -19  -1    9.40    0.90
  -4 -19   1    8.60    0.90
  -4 -19   1    7.50    0.90
   4  19  -1    8.90    0.80
  -3 -19   1   20.10    1.20
   3 -19  -1   20.90    1.20
   3  19  -1   21.30    1.00
  -2 -19   1   13.00    0.90
   2 -19  -1   14.50    1.00
  -2 -19   1   11.30    1.10
   2  19  -1   11.70    0.70
  -1 -19   1   89.59    3.50
   1 -19  -1   92.39    3.60
  -1 -19   1   88.89    3.30
   1 -19  -1   92.69    3.30
   1 -19  -1   88.99    3.70
  -1 -19   1   93.29    3.60
   0 -19   1    5.00    0.60
   0 -19   1    4.50    0.70
   0 -19  -1    4.00    0.70
   0 -19  -1    4.00    0.50
   0 -19  -1    4.00    0.60
   0 -19   1    3.70    0.60
  -1 -19  -1   21.80    1.30
  -1 -19  -1   17.40    1.10
   1 -19   1   19.70    1.10
   1  19   1   19.30    0.90
  -2 -19  -1   12.90    1.10
   2 -19   1   15.50    1.00
   2  19   1   14.40    0.80
  -3 -19  -1    6.10    0.70
  -3 -19  -1    6.00    0.70
   3 -19   1    5.80    0.60
   3  19   1    6.70    0.60
   4 -19   1    3.70    0.50
  -4 -19  -1    4.00    0.60
  -4 -19  -1    4.00    0.60
   4  19   1    3.80    0.50
  -5 -19  -1    2.80    0.60
   5 -19   1    2.40    0.50
  -5 -19  -1    3.10    0.50
   5  19   1    3.10    0.50
   6 -19   1   22.30    1.10
  -6 -19  -1   19.40    1.30
   4 -20  -1   48.90    1.90
   3 -20  -1    2.40    0.40
   3 -20  -1    2.00    0.50
   2 -20  -1    1.80    0.40
   2 -20  -1    1.00    0.50
   1 -20  -1    1.00    0.50
   1 -20  -1    0.60    0.40
   0 -20   1    0.40    0.50
   0 -20   1   -0.10    0.40
   0 -20  -1    0.20    0.50
   1 -20   1    0.10    0.50
   1 -20   1   -0.50    0.40
  -1 -20  -1    0.70    0.50
   2 -20   1   -0.20    0.40
   3 -20   1    9.10    0.80
 -21   0   2    0.10    0.40
 -20   0   2   43.80    1.80
 -20   0   2   45.70    1.80
 -19   0   2    0.50    0.50
 -19   0   2    0.20    0.50
 -18   0   2  586.84   19.10
 -18   0   2  577.14   18.80
 -17   0   2   -0.10    0.60
 -17   0   2   -0.50    0.60
 -16   0   2  309.17   10.20
 -16   0   2  302.87   10.30
 -15   0   2    1.10    0.60
 -15   0   2    0.00    0.60
 -14   0   2  202.68    7.00
  13   0  -2   -1.00    0.80
 -13   0   2    0.50    0.60
  13   0  -2    0.10    1.10
  12   0  -2 2000.20   81.39
  12   0  -2 2063.09   71.89
  11   0  -2    1.90    0.70
  11   0  -2   -0.50    0.90
 -11   0   2   -0.80    1.50
 -11   0   2   -1.40    1.20
  10   0  -2  113.09    5.90
  10   0  -2  125.29    4.80
 -10   0   2  134.49    8.60
 -10   0   2  118.89    4.90
 -10   0   2  116.49    6.70
 -10   0   2  113.99    4.90
   9   0  -2    0.50    0.50
  -9   0   2    0.00    0.60
  -9   0   2    1.60    1.60
   9   0  -2    0.40    0.50
  -9   0   2    5.90    2.00
  -9   0   2   -0.80    1.20
   9   0  -2   -0.50    0.70
  -9   0   2   -0.30    0.60
   9   0  -2    0.20    0.90
  -8   0   2  521.15   20.90
   8   0  -2  506.15   18.00
  -8   0   2  525.95   20.60
  -8   0   2  500.45   21.30
   8   0  -2  493.45   19.30
   8   0  -2  511.85   18.10
   8   0  -2  525.15   20.90
  -8   0   2  473.85   26.70
   7   0  -2    0.30    0.50
  -7   0   2    0.80    1.10
   7   0  -2    0.10    0.30
  -7   0   2    0.00    1.00
   7   0  -2    0.00    0.30
  -7   0   2    2.10    1.30
  -7   0   2   -1.90    1.30
   7   0  -2    0.20    0.70
   6   0  -2   55.39    2.90
   6   0  -2   52.69    2.10
  -6   0   2   51.79    3.70
   6   0  -2   55.19    3.50
  -6   0   2   52.39    3.10
   6   0  -2   54.29    2.60
  -6   0   2   54.29    4.00
   6   0  -2   53.59    2.10
  -6   0   2   55.09    3.30
   5   0  -2    0.00    0.60
  -5   0   2    0.40    1.20
   5   0  -2    0.50    0.30
  -5   0   2   -0.40    1.00
  -5   0   2    1.30    0.50
   5   0  -2    1.20    0.60
  -5   0   2    0.80    1.00
  -5   0   2   -0.50    0.80
   5   0  -2    0.00    0.30
   5   0  -2    0.40    0.60
   4   0  -2  203.98    7.10
  -4   0   2  192.68   10.60
  -4   0   2  190.08   10.00
  -4   0   2  203.38    8.70
  -4   0   2  200.78    8.40
   4   0  -2  192.48   10.20
  -4   0   2  207.58    8.20
   4   0  -2  195.88    7.70
  -4   0   2  185.08    8.20
  -4   0   2  200.58   10.00
   4   0  -2  200.28    7.20
   3   0  -2   -0.60    0.60
  -3   0   2    1.60    1.00
   3   0  -2   -1.00    0.70
  -3   0   2    1.00    1.00
  -3   0   2   -0.30    0.60
   3   0  -2   -0.30    0.50
  -3   0   2    0.20    0.60
  -3   0   2   -0.50    0.60
  -3   0   2   -0.60    0.60
   3   0  -2   -1.00    0.30
  -3   0   2   -0.50    0.60
   3   0  -2    0.30    0.40
   2   0  -2 1989.00  101.09
  -2   0   2 2079.79  100.99
  -2   0   2 2155.58   80.49
   2   0  -2 2042.70  101.09
   2   0  -2 2090.99   72.59
  -2   0   2 2110.99   93.29
  -2   0   2 1996.70  100.99
   1   0  -2   -9.20    0.40
  -1   0   2   -9.30    0.30
  -1   0   2   -9.80    0.40
   0   0  -2 6411.46  330.67
   0   0  -2 6400.66  334.77
   0   0   2 6693.43  330.77
   0   0  -2 7318.87  304.97
   0   0   2 7140.19  237.58
   1   0   2   -0.20    0.30
  -1   0  -2   -0.20    0.40
  -2   0  -2 1335.47   67.29
  -2   0  -2 1394.76   52.49
  -2   0  -2 1325.87   45.80
  -3   0  -2    0.20    1.20
  -3   0  -2    0.50    1.00
  -3   0  -2   -0.20    0.90
  -3   0  -2    0.00    0.90
  -3   0  -2   -1.20    0.90
  -4   0  -2 1129.89   37.50
  -4   0  -2 1094.79   39.50
   4   0   2 1054.19   44.10
  -4   0  -2 1072.89   55.19
  -4   0  -2 1115.69   42.10
  -4   0  -2 1109.69   43.00
  -5   0  -2   -1.10    0.90
  -5   0  -2    1.00    1.20
   5   0   2    0.10    0.30
  -5   0  -2   -0.40    1.00
  -5   0  -2   -1.40    1.00
  -5   0  -2   -0.30    0.80
  -6   0  -2  303.37   12.00
  -6   0  -2  320.67   13.10
  -6   0  -2  308.87   13.10
   6   0   2  284.67   11.30
   6   0   2  305.67   12.20
  -6   0  -2  293.87   11.20
  -6   0  -2  313.77   16.80
   7   0   2    0.70    0.50
  -7   0  -2   -0.40    1.00
  -7   0  -2    0.90    1.70
  -7   0  -2    0.10    1.20
   7   0   2    0.10    0.40
  -7   0  -2   -2.20    1.10
  -7   0  -2    0.00    1.50
  -8   0  -2    4.70    1.70
  -8   0  -2    9.90    2.00
  -8   0  -2   12.10    2.70
   8   0   2   10.30    1.00
  -8   0  -2   11.30    2.40
  -8   0  -2    8.00    1.50
   8   0   2    7.30    1.00
   9   0   2   -0.20    0.50
  -9   0  -2   -0.50    1.50
  -9   0  -2   -0.40    1.40
   9   0   2   -0.20    0.60
  -9   0  -2    0.40    1.30
  -9   0  -2   -0.10    1.60
  -9   0  -2    0.30    0.40
  10   0   2    1.10    0.70
 -10   0  -2    1.50    0.50
  10   0   2    2.60    0.70
 -10   0  -2    3.60    1.70
 -10   0  -2    0.80    1.40
 -10   0  -2    3.20    1.60
 -10   0  -2    2.70    2.00
 -11   0  -2    1.80    1.70
  11   0   2   -0.30    0.70
 -11   0  -2   -1.80    1.30
 -11   0  -2    1.00    1.60
  11   0   2   -1.10    0.60
 -12   0  -2   18.60    3.30
  12   0   2   22.50    2.20
  12   0   2   20.00    1.90
 -12   0  -2   16.10    3.20
 -13   0  -2    0.70    0.50
  13   0   2    0.10    0.90
 -13   0  -2   -0.90    2.00
 -14   0  -2  578.34   18.50
 -14   0  -2  562.94   18.70
 -15   0  -2   -0.60    0.50
 -15   0  -2    1.00    0.60
 -16   0  -2   31.10    1.50
 -16   0  -2   27.60    1.60
 -17   0  -2    0.30    0.50
 -18   0  -2   60.79    2.40
 -19   0  -2   -0.10    0.40
 -20   0  -2   40.50    1.60
 -20  -1   2   41.50    1.60
 -20  -1   2   35.10    1.60
 -20   1   2   42.10    1.60
 -20   1   2   37.90    1.70
 -19  -1   2    5.60    0.60
 -19  -1   2    5.90    0.70
 -19   1   2    5.80    0.70
 -19   1   2    5.20    0.70
 -18  -1   2    0.90    0.60
 -18  -1   2    1.00    0.60
 -18   1   2    1.50    0.60
 -18   1   2   -0.40    0.50
 -17  -1   2  425.06   14.00
 -17  -1   2  429.26   13.80
 -17   1   2  419.96   13.80
 -17   1   2  418.16   14.00
 -16  -1   2  320.87   10.30
 -16  -1   2  300.47   10.50
 -16   1   2  314.07   10.30
 -16   1   2  312.97   10.50
 -15  -1   2  430.46   13.90
 -15  -1   2  417.96   13.70
 -15   1   2  412.26   13.90
 -15   1   2  416.76   13.70
  14  -1  -2  260.67   12.70
 -14  -1   2  278.87    9.20
 -14   1   2  274.37    9.20
  13  -1  -2    1.60    0.90
  13  -1  -2    3.60    1.40
 -13   1   2    4.10    0.70
 -13   1   2    3.70    1.80
  12  -1  -2  199.38    9.60
  12  -1  -2  217.38    8.10
 -12   1   2  201.18   10.40
  12   1  -2  199.78    8.30
 -11  -1   2  337.07   13.00
 -11  -1   2  359.86   13.10
  11  -1  -2  350.26   14.80
 -11  -1   2  342.17   12.60
 -11  -1   2  367.26   20.10
  11  -1  -2  349.57   12.70
 -11   1   2  315.47   15.80
  11   1  -2  318.57   15.10
  11   1  -2  345.87   12.90
  10  -1  -2   87.99    4.20
 -10  -1   2   78.99    3.50
  10  -1  -2   79.59    3.30
 -10  -1   2   76.19    3.70
  10  -1  -2   78.99    3.20
  10  -1  -2   77.99    4.30
 -10  -1   2   81.49    6.50
 -10   1   2   81.59    6.40
  10   1  -2   81.49    3.60
 -10   1   2   78.39    5.80
 -10   1   2   64.09    4.90
  10   1  -2   79.39    4.60
 -10   1   2   75.69    5.10
   9  -1  -2 1041.00   36.00
   9  -1  -2 1055.19   41.10
   9  -1  -2 1019.20   36.00
  -9  -1   2  988.20   52.49
   9  -1  -2 1025.00   38.20
  -9  -1   2 1026.90   39.90
  -9  -1   2 1037.40   37.70
  -9   1   2 1019.90   37.20
  -9   1   2  998.80   39.70
  -9   1   2  982.20   37.20
  -9   1   2 1060.99   52.49
   9   1  -2 1016.50   41.40
  -9   1   2 1004.90   41.00
   9   1  -2 1027.90   36.30
  -9   1   2 1028.20   41.00
   8  -1  -2  272.87   11.40
  -8  -1   2  282.47   11.90
  -8  -1   2  262.77   15.20
   8  -1  -2  257.97   10.60
  -8  -1   2  277.87   11.70
  -8  -1   2  276.27   10.60
   8   1  -2  267.37    9.90
  -8   1   2  277.57   12.00
  -8   1   2  253.67   14.90
  -8   1   2  262.87   11.40
   8   1  -2  283.27   10.00
  -8   1   2  286.07   10.30
  -8   1   2  263.97   11.80
   8   1  -2  241.08   10.70
   8   1  -2  268.27   11.70
  -8   1   2  272.67   12.50
  -7  -1   2  332.47   13.70
  -7  -1   2  349.17   13.90
  -7  -1   2  316.17   17.80
   7  -1  -2  322.97   12.70
   7   1  -2  313.57   12.80
  -7   1   2  319.27   12.40
  -7   1   2  336.07   17.70
  -7   1   2  327.57   13.20
   7   1  -2  316.57   11.90
  -7   1   2  345.97   14.00
   7   1  -2  329.37   13.90
  -7   1   2  344.47   13.80
   7   1  -2  348.47   12.00
  -7   1   2  316.87   14.20
  -6  -1   2  204.98   12.40
  -6  -1   2  226.88    9.50
  -6  -1   2  240.58    9.90
   6  -1  -2  221.18   11.80
   6  -1  -2  238.58    8.90
   6  -1  -2  227.58    8.90
   6   1  -2  219.18    8.30
  -6   1   2  231.38    9.80
  -6   1   2  205.48   12.30
  -6   1   2  237.98    9.40
   6   1  -2  231.48    9.00
   6   1  -2  223.78   12.20
  -6   1   2  249.48   10.30
   6   1  -2  234.18    8.40
  -6   1   2  228.38    9.80
   6   1  -2  232.28    9.80
  -6   1   2  221.38    8.80
  -5  -1   2 1207.58   45.40
  -5  -1   2 1183.08   56.69
  -5  -1   2 1212.58   56.69
  -5  -1   2 1060.49   45.00
  -5  -1   2 1058.99   57.99
   5  -1  -2 1049.70   56.89
  -5  -1   2 1154.18   43.90
   5  -1  -2 1240.38   42.80
   5  -1  -2 1228.18   42.80
  -5   1   2 1167.08   57.99
  -5   1   2 1167.38   43.90
   5   1  -2 1188.48   46.20
  -5   1   2 1221.68   44.80
   5   1  -2 1152.48   40.90
   5   1  -2 1180.88   42.80
  -5   1   2 1169.68   41.90
  -5   1   2 1149.19   45.30
  -5   1   2 1129.99   42.30
   5   1  -2 1178.18   40.80
   5   1  -2 1105.79   57.09
   4  -1  -2  147.89    5.60
  -4  -1   2  133.79    6.20
   4  -1  -2  142.69    4.90
  -4  -1   2  118.99    7.60
   4  -1  -2  136.19    7.30
  -4  -1   2  134.49    7.30
   4  -1  -2  140.59    4.90
  -4  -1   2  139.09    6.00
   4  -1  -2  144.79    5.50
  -4  -1   2  128.49    7.20
  -4   1   2  131.19    6.10
  -4   1   2  135.49    5.90
   4   1  -2  134.79    5.20
   4   1  -2  148.29    5.60
   4   1  -2  129.49    6.00
  -4   1   2  136.19    5.70
   4   1  -2  130.59    7.40
  -4   1   2  135.29    6.20
  -4   1   2  137.29    7.50
  -4   1   2  144.29    6.40
   4   1  -2  141.39    5.20
  -3  -1   2   34.20    2.40
  -3  -1   2   36.90    2.40
   3  -1  -2   34.40    1.80
   3  -1  -2   33.10    1.90
   3  -1  -2   39.10    2.50
  -3  -1   2   38.10    2.30
   3  -1  -2   37.60    2.50
   3  -1  -2   35.80    1.50
   3  -1  -2   37.60    1.50
  -3  -1   2   40.70    2.20
  -3   1   2   38.40    2.00
   3   1  -2   36.40    1.70
  -3   1   2   33.10    2.30
  -3   1   2   33.10    2.00
  -3   1   2   32.20    2.20
  -3   1   2   35.90    2.30
   3   1  -2   35.00    2.50
  -3   1   2   39.50    2.50
  -3   1   2   33.80    2.20
  -3   1   2   34.90    2.40
  -2  -1   2  593.34   23.10
   2  -1  -2  572.94   20.60
   2  -1  -2  592.24   28.80
   2  -1  -2  570.74   28.80
  -2   1   2  604.74   23.00
  -2   1   2  567.54   28.70
  -2   1   2  555.54   28.70
  -2   1   2  621.04   26.60
   2   1  -2  607.14   28.90
  -2   1   2  549.05   28.80
  -1  -1   2 2858.01  144.89
   1  -1  -2 3063.69  145.19
   1  -1  -2 2967.50  144.89
   1   1  -2 2804.62  144.89
  -1   1   2 3074.19  115.39
  -1   1   2 3077.09  144.89
   0  -1  -2 2729.53  135.09
   0  -1   2 2826.82   96.89
   0  -1   2 2765.22  134.99
   0  -1  -2 2793.12  136.69
   0  -1   2 2782.62   96.89
   0   1  -2 2835.32  124.39
   0   1   2 2765.22  135.09
   0   1   2 2789.92  135.09
   0   1  -2 2643.54  134.99
   1  -1   2 1650.83   80.19
  -1  -1  -2 1654.93   74.09
  -1  -1  -2 1656.63   81.59
  -1  -1  -2 1588.94   80.39
   1   1   2 1685.83   80.49
   1   1   2 1703.33   57.69
   1   1   2 1641.94   80.49
  -1   1  -2 1619.24   81.69
   1   1   2 1639.94   57.69
  -2  -1  -2  276.17   11.70
  -2  -1  -2  255.57   13.90
  -2  -1  -2  269.17   10.90
  -2  -1  -2  273.07    9.50
  -2   1  -2  261.77   10.10
  -2   1  -2  263.87   14.00
   2   1   2  280.07   10.10
   2   1   2  275.77   13.50
  -2   1  -2  265.77    9.60
   2   1   2  268.47   10.90
  -2   1  -2  260.87   10.90
  -3  -1  -2   45.10    2.70
  -3  -1  -2   44.70    2.50
  -3  -1  -2   47.20    2.40
  -3  -1  -2   46.90    3.00
  -3  -1  -2   47.40    2.90
  -3  -1  -2   45.40    3.60
  -3   1  -2   49.80    2.90
   3   1   2   47.10    3.00
   3   1   2   50.99    2.40
   3   1   2   53.99    2.20
  -3   1  -2   46.60    3.70
  -3   1  -2   50.79    2.60
  -3   1  -2   55.79    2.80
   3   1   2   45.30    2.60
  -3   1  -2   51.49    3.00
  -4  -1  -2  626.04   24.50
  -4  -1  -2  647.24   25.90
  -4  -1  -2  624.84   21.60
  -4  -1  -2  609.84   22.90
  -4  -1  -2  620.54   22.80
  -4  -1  -2  655.43   24.90
  -4  -1  -2  593.54   32.00
  -4   1  -2  618.14   23.00
  -4   1  -2  621.74   24.50
  -4   1  -2  614.84   24.90
  -4   1  -2  590.24   31.90
   4   1   2  606.94   25.50
  -4   1  -2  627.54   21.80
   4   1   2  626.04   30.80
   4   1   2  635.74   24.90
   4   1   2  650.73   23.10
  -5  -1  -2  334.47   20.00
  -5  -1  -2  371.16   14.00
  -5  -1  -2  385.56   14.40
  -5  -1  -2  391.86   15.70
  -5  -1  -2  381.96   13.50
  -5  -1  -2  384.26   15.60
  -5   1  -2  394.76   14.60
  -5   1  -2  387.16   13.70
   5   1   2  397.26   15.30
  -5   1  -2  343.87   20.00
  -5   1  -2  382.66   15.70
  -5   1  -2  375.56   15.50
   5   1   2  380.26   14.20
  -6  -1  -2  709.53   26.30
  -6  -1  -2  719.93   25.00
  -6  -1  -2  732.93   29.00
  -6  -1  -2  740.73   37.40
  -6  -1  -2  739.53   26.70
  -6  -1  -2  725.33   28.70
  -6   1  -2  721.53   28.70
  -6   1  -2  705.73   25.30
  -6   1  -2  730.73   26.80
   6   1   2  709.53   28.80
   6   1   2  687.03   26.70
  -6   1  -2  744.63   29.10
  -6   1  -2  708.53   37.30
  -7  -1  -2  808.02   28.70
  -7  -1  -2  848.52   30.70
  -7  -1  -2  861.01   33.00
  -7  -1  -2  812.12   33.20
  -7  -1  -2  813.12   30.00
  -7  -1  -2  864.21   43.00
   7   1   2  775.62   30.70
  -7   1  -2  834.32   29.00
  -7   1  -2  832.92   33.00
  -7   1  -2  883.51   42.90
   7   1   2  810.22   33.00
  -7   1  -2  785.02   33.30
  -7   1  -2  824.22   30.70
  -8  -1  -2   72.99    4.40
  -8  -1  -2   85.89    6.60
  -8  -1  -2   77.49    4.70
   8  -1   2   72.89    3.10
   8   1   2   77.69    3.50
  -8   1  -2   77.89    6.20
  -8   1  -2   67.49    4.70
  -8   1  -2   76.99    5.30
   8   1   2   78.19    3.80
  -8   1  -2   73.29    4.00
  -8   1  -2   71.09    4.50
  -9  -1  -2  425.26   15.60
   9  -1   2  458.65   16.60
   9  -1   2  438.36   17.80
  -9  -1  -2  432.66   17.70
  -9  -1  -2  480.85   24.90
  -9  -1  -2  421.66   18.90
   9   1   2  448.36   16.90
  -9   1  -2  424.76   17.80
  -9   1  -2  405.36   19.00
   9   1   2  441.06   18.30
  -9   1  -2  422.36   19.30
  -9   1  -2  445.56   16.50
  -9   1  -2  483.35   24.90
  10  -1   2  240.28   10.30
 -10  -1  -2  231.38    8.90
 -10  -1  -2  246.98   15.40
  10  -1   2  257.27    9.60
 -10  -1  -2  239.28   11.70
 -10  -1  -2  242.48   11.00
 -10   1  -2  239.48   11.20
 -10   1  -2  237.98   12.40
  10   1   2  244.18   10.80
 -10   1  -2  242.18   12.00
  10   1   2  244.08    8.90
  10   1   2  238.38    9.90
 -10   1  -2  246.98   15.30
 -10   1  -2  263.17   12.10
  10   1   2  246.88    9.00
 -11  -1  -2   13.80    2.80
 -11  -1  -2   12.60    2.50
  11  -1   2   14.00    1.40
 -11  -1  -2   13.20    1.10
  11  -1   2   13.10    1.50
 -11   1  -2   10.70    2.50
  11   1   2   11.90    1.80
 -11   1  -2   16.90    3.10
 -11   1  -2   17.50    2.80
  11   1   2   16.40    1.30
 -11   1  -2   10.20    3.00
  12  -1   2   23.20    2.10
  12  -1   2   21.80    1.80
 -12  -1  -2   22.10    1.30
 -12  -1  -2   20.20    3.40
 -12   1  -2   24.60    3.90
 -12   1  -2   22.90    3.20
 -12   1  -2   20.20    3.60
  12   1   2   17.20    2.20
  13  -1   2   10.20    1.80
 -13   1  -2    7.70    2.90
 -13   1  -2    6.30    2.70
  13   1   2    5.40    1.60
 -13   1  -2   10.40    0.90
 -14  -1  -2    5.10    0.70
 -14   1  -2    6.20    0.80
 -14   1  -2    4.10    0.70
 -15  -1  -2  216.68    7.30
 -15   1  -2  217.88    7.40
 -15   1  -2  210.58    7.30
 -16  -1  -2  211.98    7.10
 -16   1  -2  211.68    7.10
 -16   1  -2  207.18    7.20
 -17  -1  -2   27.70    1.50
 -17   1  -2   30.50    1.60
 -17   1  -2   28.90    1.50
 -18  -1  -2  209.98    6.90
 -18   1  -2  209.08    6.90
 -18   1  -2  201.88    7.00
 -19  -1  -2   81.99    3.00
 -19   1  -2   83.89    3.00
 -20  -1  -2    0.90    0.40
 -20   1  -2    1.10    0.40
 -20  -2   2    9.30    0.80
 -20   2   2   11.20    0.90
 -20   2   2   10.00    0.90
 -19  -2   2  102.99    3.80
 -19  -2   2  110.09    3.90
 -19   2   2  114.49    3.90
 -19   2   2  108.79    3.80
 -18  -2   2   12.80    1.00
 -18  -2   2   12.40    1.10
 -18   2   2   12.00    1.10
 -18   2   2    9.60    0.90
 -17  -2   2  275.27    9.00
 -17  -2   2  275.07    9.20
 -17   2   2  253.97    9.20
 -17   2   2  283.47    9.10
 -16  -2   2   24.80    1.40
 -16  -2   2   23.50    1.50
 -16   2   2   28.20    1.50
 -16   2   2   25.60    1.60
 -15  -2   2    6.50    0.80
 -15  -2   2    7.00    0.90
 -15   2   2    7.70    0.90
 -15   2   2    8.20    0.90
 -14  -2   2    1.10    0.60
 -14   2   2    0.70    0.60
 -14   2   2    1.30    0.60
 -14   2   2    0.50    1.60
 -13  -2   2  676.53   22.20
  13  -2  -2  667.13   28.30
 -13   2   2  683.33   30.20
 -13   2   2  692.93   22.20
 -12  -2   2   12.00    1.20
 -12  -2   2   10.10    1.30
 -12  -2   2   11.00    1.30
  12  -2  -2    9.40    1.10
  12  -2  -2    8.60    1.60
 -12   2   2   15.90    3.50
 -12   2   2   14.90    2.50
 -11  -2   2  731.53   26.10
  11  -2  -2  689.93   24.70
 -11  -2   2  720.93   37.30
  11  -2  -2  672.73   24.70
  11  -2  -2  677.33   28.40
 -11  -2   2  717.33   24.80
  11  -2  -2  725.53   26.60
 -11   2   2  657.23   29.30
 -11   2   2  700.13   29.70
 -11   2   2  637.24   30.20
  10  -2  -2    5.00    1.20
 -10  -2   2    5.80    0.90
  10  -2  -2    6.00    0.70
 -10  -2   2    5.60    1.10
  10  -2  -2    4.50    0.50
  10  -2  -2    3.60    0.90
 -10  -2   2    5.30    2.10
 -10   2   2    6.00    2.00
  10   2  -2    3.00    1.20
  10   2  -2    6.00    1.00
 -10   2   2    6.40    1.90
 -10   2   2    3.90    2.30
   9  -2  -2  658.73   24.90
  -9  -2   2  660.53   24.80
  -9  -2   2  692.03   34.80
  -9   2   2  629.94   25.40
  -9   2   2  671.73   27.40
   9   2  -2  619.34   27.20
  -9   2   2  640.74   26.30
   9   2  -2  689.53   23.80
  -9   2   2  662.63   34.50
  -9   2   2  651.03   27.40
  -8  -2   2    6.10    2.00
  -8  -2   2    4.80    1.00
   8  -2  -2    5.40    0.90
   8  -2  -2    4.00    0.90
  -8   2   2    5.20    1.70
  -8   2   2    4.30    1.70
   8   2  -2    4.50    0.80
  -8   2   2    6.50    1.80
  -8   2   2    5.40    0.70
  -8   2   2    5.50    1.70
   8   2  -2    5.70    1.30
  -8   2   2    4.40    2.00
   7  -2  -2   94.09    4.20
  -7  -2   2   91.49    6.40
  -7  -2   2   96.69    5.30
   7  -2  -2   95.19    4.20
  -7  -2   2   97.59    4.40
  -7   2   2   94.99    5.20
   7   2  -2   90.89    4.40
   7   2  -2   98.39    4.90
  -7   2   2   90.99    3.90
  -7   2   2   93.79    5.00
  -7   2   2  103.59    5.60
  -7   2   2   92.49    6.20
  -7   2   2  100.69    4.60
  -7   2   2  102.99    5.20
   7   2  -2   89.59    3.90
  -6  -2   2   15.40    1.50
  -6  -2   2   18.20    1.50
  -6  -2   2   19.80    1.60
   6  -2  -2   18.70    1.40
  -6  -2   2   19.90    2.20
  -6  -2   2   17.80    2.50
  -6  -2   2   16.80    1.80
   6  -2  -2   18.50    1.40
  -6   2   2   16.20    2.00
  -6   2   2   18.70    2.20
  -6   2   2   18.60    1.80
   6   2  -2   18.40    1.50
  -6   2   2   16.30    2.30
  -6   2   2   19.10    2.10
  -6   2   2   16.80    2.00
  -6   2   2   19.00    1.30
   6   2  -2   15.60    1.20
   6   2  -2   16.80    1.30
  -5  -2   2    3.80    1.30
   5  -2  -2    4.90    0.70
  -5  -2   2    2.80    0.70
  -5  -2   2    3.10    0.80
   5  -2  -2    2.40    0.60
   5  -2  -2    7.80    1.20
  -5  -2   2    4.00    1.10
  -5  -2   2    2.50    0.90
  -5  -2   2    3.10    0.90
  -5  -2   2    2.10    1.20
   5   2  -2    9.00    1.20
   5   2  -2    2.70    0.60
  -5   2   2    3.00    1.40
  -5   2   2    2.80    1.20
  -5   2   2    2.60    0.70
  -5   2   2    5.50    1.20
  -5   2   2    1.70    1.10
   5   2  -2    2.40    0.90
  -5   2   2    4.60    1.30
   5   2  -2    3.80    0.70
   5   2  -2    1.60    0.60
   4  -2  -2  214.28    8.10
  -4  -2   2  208.78   10.90
  -4  -2   2  211.68    8.80
  -4  -2   2  193.88    9.10
  -4  -2   2  222.28    8.90
   4  -2  -2  207.48   10.80
   4  -2  -2  220.18    8.20
  -4   2   2  210.68    8.80
  -4   2   2  189.18   11.00
  -4   2   2  218.38    9.20
  -4   2   2  214.28    9.00
   4   2  -2  213.08    7.80
  -4   2   2  203.08    8.40
   4   2  -2  204.18   11.00
   4   2  -2  197.28    7.80
  -4   2   2  207.78    8.30
   3  -2  -2    5.40    1.10
  -3  -2   2    6.00    1.40
  -3  -2   2    6.90    1.30
   3  -2  -2    7.00    0.60
  -3  -2   2    4.60    1.30
   3  -2  -2    4.30    0.80
   3  -2  -2    6.60    0.80
  -3  -2   2    5.60    1.10
   3  -2  -2    5.30    1.10
  -3   2   2    5.80    1.10
  -3   2   2    6.40    0.90
   3   2  -2    4.20    1.10
  -3   2   2    5.60    1.40
  -3   2   2    4.60    0.80
  -3   2   2    5.50    1.30
  -3   2   2    5.50    0.80
  -3   2   2    6.50    1.00
   3   2  -2    6.20    0.80
   2  -2  -2  724.43   35.90
   2  -2  -2  679.23   35.90
   2  -2  -2  730.43   25.70
  -2  -2   2  736.83   27.50
  -2  -2   2  706.53   36.00
   2  -2  -2  731.93   25.70
  -2   2   2  782.72   28.70
  -2   2   2  759.72   35.80
  -2   2   2  748.23   33.10
  -2   2   2  686.53   35.80
  -1  -2   2 3204.58  108.59
   1  -2  -2 3248.97  151.28
  -1  -2   2 3206.18  108.59
  -1  -2   2 2914.61  151.18
   1  -2  -2 3052.89  151.18
  -1   2   2 3033.10  151.18
  -1   2   2 3179.28  120.39
   1   2  -2 3003.60  151.18
   1   2  -2 3088.29  139.59
   0  -2  -2 1966.80   92.19
   0  -2   2 1942.61   65.99
   0  -2   2 1878.01   69.09
   0  -2  -2 1798.02   92.09
   0  -2   2 1823.12   92.09
   0  -2   2 1951.00   65.99
   0   2  -2 2017.50   84.79
   0   2  -2 1765.22   73.29
   0   2   2 1926.61   92.19
   0   2  -2 1844.72   91.89
   0   2  -2 1942.21   84.69
   0   2   2 1781.42   92.09
   1  -2   2   32.20    1.40
   1  -2   2   29.50    1.90
  -1  -2  -2   27.90    2.20
  -1  -2  -2   30.70    2.30
   1   2   2   28.90    1.50
   1   2   2   28.80    2.30
  -1   2  -2   30.50    1.70
   1   2   2   28.30    2.30
  -1   2  -2   31.60    2.10
  -2  -2  -2  647.04   32.60
  -2  -2  -2  622.64   33.40
  -2  -2  -2  657.83   27.20
   2   2   2  667.93   32.80
  -2   2  -2  650.43   24.00
  -2   2  -2  672.23   26.10
   2   2   2  673.13   24.60
  -2   2  -2  676.03   25.60
   2   2   2  651.23   27.00
   2   2   2  682.93   23.40
   2   2   2  649.14   23.40
  -2   2  -2  679.63   22.90
  -3  -2  -2  100.89    6.50
  -3  -2  -2  110.19    5.70
  -3  -2  -2  112.39    4.30
  -3  -2  -2  113.69    5.50
  -3  -2  -2  104.59    5.10
   3   2   2  107.99    4.90
  -3   2  -2  116.29    4.60
   3   2   2  105.39    5.10
   3   2   2  119.19    4.10
  -3   2  -2  106.59    5.20
   3   2   2  108.69    4.10
   3   2   2  114.09    4.50
   3   2   2  104.79    6.00
  -3   2  -2  100.59    6.50
  -3   2  -2  108.19    4.80
   3   2   2  110.99    4.10
  -3   2  -2  106.59    5.20
  -4  -2  -2  395.16   16.30
  -4  -2  -2  368.26   13.40
  -4  -2  -2  373.26   14.30
  -4  -2  -2  350.76   20.00
  -4  -2  -2  368.86   14.10
  -4  -2  -2  407.46   15.70
  -4   2  -2  386.66   15.70
  -4   2  -2  392.16   13.70
  -4   2  -2  386.36   14.50
   4   2   2  389.86   13.50
   4   2   2  369.96   15.50
   4   2   2  400.86   13.50
   4   2   2  360.16   15.90
  -4   2  -2  376.46   15.40
  -4   2  -2  361.36   20.00
   4   2   2  387.06   14.40
   4   2   2  380.06   19.20
  -5  -2  -2  713.03   40.90
  -5  -2  -2  795.02   29.50
  -5  -2  -2  838.42   32.00
  -5  -2  -2  814.12   33.30
  -5  -2  -2  792.92   29.20
  -5  -2  -2  793.12   27.60
  -5   2  -2  826.32   28.00
   5   2   2  780.22   28.20
   5   2   2  811.72   29.80
  -5   2  -2  827.92   29.60
  -5   2  -2  821.02   31.50
   5   2   2  812.22   28.30
   5   2   2  800.02   32.10
  -5   2  -2  788.62   41.00
  -5   2  -2  827.32   32.10
  -6  -2  -2   38.90    2.30
  -6  -2  -2   42.00    4.00
  -6  -2  -2   38.00    2.70
  -6  -2  -2   38.30    3.10
  -6  -2  -2   38.00    2.90
  -6  -2  -2   39.40    2.10
  -6   2  -2   40.00    3.30
  -6   2  -2   41.90    3.20
   6   2   2   40.70    1.70
  -6   2  -2   42.50    2.70
   6   2   2   39.10    1.70
  -6   2  -2   44.60    3.00
  -6   2  -2   36.40    3.80
   6   2   2   38.20    2.40
   6   2   2   40.10    2.20
  -7  -2  -2  110.39    4.60
  -7  -2  -2  106.99    5.80
  -7  -2  -2  113.49    5.50
  -7  -2  -2  127.09    8.00
   7   2   2  106.39    4.80
   7   2   2  111.99    4.20
   7   2   2  108.79    5.30
   7   2   2  105.59    4.20
  -7   2  -2  114.09    6.30
  -7   2  -2  115.59    6.10
  -7   2  -2  108.99    7.70
  -7   2  -2  105.39    5.60
  -7   2  -2  108.99    5.20
  -8  -2  -2  368.16   20.70
  -8  -2  -2  362.56   13.80
  -8  -2  -2  388.66   14.80
  -8  -2  -2  361.16   15.90
   8   2   2  345.77   13.30
  -8   2  -2  383.06   14.10
  -8   2  -2  365.66   16.20
   8   2   2  358.16   15.40
   8   2   2  370.86   14.30
  -8   2  -2  348.47   14.90
   8   2   2  368.26   13.20
  -8   2  -2  355.16   16.20
  -8   2  -2  405.36   20.90
  -9  -2  -2    3.20    0.70
  -9  -2  -2    7.30    1.90
   9  -2   2    3.40    0.50
  -9  -2  -2    3.50    1.50
  -9  -2  -2    3.70    2.10
  -9   2  -2    5.60    1.90
  -9   2  -2    2.30    1.40
  -9   2  -2    3.70    1.70
   9   2   2    3.00    0.90
  -9   2  -2    1.50    1.80
   9   2   2    4.10    1.10
   9   2   2    1.80    0.60
   9   2   2    2.80    0.70
  -9   2  -2    3.10    2.00
 -10  -2  -2   53.29    2.50
 -10  -2  -2   49.99    4.10
 -10  -2  -2   48.90    4.00
  10  -2   2   57.89    2.50
 -10  -2  -2   54.99    6.10
  10  -2   2   49.50    2.60
 -10   2  -2   50.79    4.80
 -10   2  -2   50.29    4.20
 -10   2  -2   56.79    5.80
 -10   2  -2   50.09    3.70
 -10   2  -2   51.89    4.40
  10   2   2   50.29    3.40
  10   2   2   55.99    2.60
 -10   2  -2   58.69    4.20
  11  -2   2  169.48    7.80
 -11  -2  -2  177.28    9.50
  11  -2   2  187.08    7.30
 -11  -2  -2  181.88    6.80
 -11   2  -2  191.78   10.60
 -11   2  -2  172.58    9.90
 -11   2  -2  182.08    9.40
  11   2   2  163.08    8.60
  11   2   2  186.68    7.20
 -11   2  -2  193.98    9.80
  12  -2   2  132.79    6.40
  12  -2   2  147.89    6.00
 -12  -2  -2  135.39    5.50
  12   2   2  147.29    6.20
 -12   2  -2  140.49    8.20
 -12   2  -2  148.09    8.80
 -12   2  -2  149.79    9.30
 -12   2  -2  141.69    4.90
 -12   2  -2  139.09    8.10
  12   2   2  123.49    7.20
 -13  -2  -2   21.10    1.40
 -13  -2  -2   21.70    1.50
 -13   2  -2   21.80    1.40
  13   2   2   19.00    2.80
 -13   2  -2   27.60    4.30
 -13   2  -2   23.00    3.50
 -13   2  -2   19.70    1.40
 -14  -2  -2    9.10    0.90
 -14   2  -2    8.20    0.90
 -14   2  -2    8.00    0.80
 -15  -2  -2   53.09    2.20
 -15   2  -2   52.59    2.20
 -15   2  -2   50.19    2.30
 -16  -2  -2   -0.20    0.50
 -16   2  -2    0.80    0.60
 -16   2  -2    1.30    0.60
 -17  -2  -2  147.29    5.10
 -17   2  -2  145.09    5.10
 -17   2  -2  151.28    5.20
 -18  -2  -2    0.10    0.50
 -18   2  -2   -0.50    0.50
 -18   2  -2   -0.80    0.50
 -19  -2  -2   28.10    1.30
 -19   2  -2   27.30    1.30
 -19   2  -2   28.60    1.30
 -20  -2  -2    0.00    0.40
 -20  -3   2    2.30    0.50
 -20   3   2    2.20    0.50
 -19  -3   2   55.59    2.10
 -19   3   2   55.69    2.30
 -19   3   2   54.59    2.20
 -18  -3   2  104.49    3.70
 -18  -3   2  100.09    3.60
 -18   3   2  103.89    3.80
 -18   3   2   97.59    3.70
 -17  -3   2    1.10    0.60
 -17  -3   2    0.60    0.60
 -17   3   2    2.00    0.70
 -17   3   2    1.20    0.60
 -16  -3   2  611.24   20.40
 -16  -3   2  624.44   20.70
 -16  -3   2  644.04   20.40
 -16   3   2  630.14   20.70
 -16   3   2  647.44   20.40
 -15  -3   2   26.60    1.40
 -15  -3   2   27.70    1.50
 -15  -3   2   27.20    1.60
 -15   3   2   27.70    3.50
 -15   3   2   29.60    1.60
 -15   3   2   29.70    1.60
 -14  -3   2  151.28    5.30
 -14  -3   2  149.99    5.20
 -14  -3   2  146.19    5.20
 -14   3   2  156.18    5.20
 -14   3   2  141.49    8.40
 -14   3   2  149.88    5.30
 -13  -3   2  151.08    5.40
 -13  -3   2  156.58    6.50
 -13  -3   2  150.18    5.30
  13  -3  -2  161.48    7.70
 -13   3   2  163.38    8.70
 -13   3   2  156.88    5.50
 -13   3   2  153.18   10.00
 -12  -3   2    8.30    1.30
  12  -3  -2    6.10    0.90
 -12  -3   2    9.40    1.50
  12  -3  -2    6.60    1.40
 -12   3   2   13.20    3.20
 -12   3   2    4.50    2.30
 -12   3   2   10.60    2.30
  11  -3  -2   59.59    3.50
  11  -3  -2   73.19    2.90
 -11  -3   2   72.79    6.50
 -11  -3   2   69.29    3.80
  11  -3  -2   69.69    3.90
 -11  -3   2   60.79    3.20
 -11  -3   2   63.69    2.80
 -11  -3   2   69.39    2.70
  11  -3  -2   64.29    2.80
 -11   3   2   74.59    5.50
 -11   3   2   60.79    4.50
 -11   3   2   73.69    6.00
 -10  -3   2  604.64   22.60
  10  -3  -2  610.44   22.60
 -10  -3   2  590.74   31.90
 -10  -3   2  569.34   21.10
 -10   3   2  581.84   23.40
 -10   3   2  557.04   25.20
 -10   3   2  611.04   25.50
  -9  -3   2   22.10    2.10
   9  -3  -2   28.10    1.90
  -9  -3   2   29.70    3.90
   9  -3  -2   29.30    2.00
  -9   3   2   30.00    3.50
  -9   3   2   26.90    3.60
  -9   3   2   23.20    3.00
  -9   3   2   20.70    3.00
   8  -3  -2  572.34   20.80
  -8  -3   2  519.55   21.00
   8  -3  -2  584.84   20.90
  -8  -3   2  564.54   29.30
  -8   3   2  549.15   23.00
   8   3  -2  537.55   20.00
  -8   3   2  535.75   21.30
  -8   3   2  575.64   23.30
  -8   3   2  544.85   22.10
  -8   3   2  509.95   28.70
   7  -3  -2  715.83   26.90
   7  -3  -2  670.73   27.00
  -7  -3   2  735.13   37.50
  -7  -3   2  749.53   35.50
  -7  -3   2  680.23   30.30
  -7   3   2  699.73   36.90
  -7   3   2  755.62   28.30
  -7   3   2  712.93   27.10
  -7   3   2  743.63   29.60
   7   3  -2  686.53   25.90
  -7   3   2  708.53   29.10
   7   3  -2  738.63   29.70
  -7   3   2  749.62   26.40
  -7   3   2  761.72   25.70
  -6  -3   2 1189.48   44.90
  -6  -3   2 1271.97   59.99
  -6  -3   2 1253.47   59.99
  -6  -3   2 1110.59   49.60
  -6  -3   2 1163.28   61.49
   6  -3  -2 1273.67   45.00
   6  -3  -2 1177.18   45.00
  -6   3   2 1210.68   47.30
  -6   3   2 1271.07   44.40
  -6   3   2 1241.38   42.10
  -6   3   2 1268.57   44.40
  -6   3   2 1246.68   48.40
   6   3  -2 1193.38   48.80
  -6   3   2 1116.09   61.09
   6   3  -2 1240.48   43.20
  -6   3   2 1266.57   46.30
  -5  -3   2  733.13   28.90
   5  -3  -2  684.53   35.80
  -5  -3   2  724.63   36.00
   5  -3  -2  701.33   26.90
   5  -3  -2  741.43   26.80
  -5  -3   2  688.03   29.80
  -5   3   2  728.23   26.50
  -5   3   2  739.13   29.20
   5   3  -2  751.62   25.80
  -5   3   2  729.43   26.60
  -5   3   2  744.43   28.50
  -5   3   2  695.43   27.80
   5   3  -2  719.03   36.10
   4  -3  -2  657.63   35.60
  -4  -3   2  772.62   28.80
   4  -3  -2  733.43   26.70
   4  -3  -2  735.73   25.30
   4  -3  -2  716.33   25.30
  -4  -3   2  690.93   29.60
  -4  -3   2  702.23   35.80
   4  -3  -2  747.33   26.80
  -4   3   2  726.63   26.30
  -4   3   2  661.93   26.40
   4   3  -2  716.53   35.90
  -4   3   2  682.53   28.00
   4   3  -2  735.43   25.70
  -4   3   2  738.73   28.00
  -4   3   2  731.33   28.10
  -4   3   2  729.93   27.50
   3  -3  -2   67.09    3.20
  -3  -3   2   77.49    3.90
   3  -3  -2   67.39    2.80
   3  -3  -2   67.79    2.80
   3  -3  -2   69.39    3.30
  -3  -3   2   61.29    3.80
   3  -3  -2   63.69    4.30
  -3   3   2   68.19    3.50
  -3   3   2   65.29    3.90
  -3   3   2   60.79    3.40
   3   3  -2   71.69    4.50
  -3   3   2   65.09    3.80
  -3   3   2   69.29    3.90
  -3   3   2   68.99    3.40
  -3   3   2   70.69    3.50
   2  -3  -2 3170.58  158.28
  -2  -3   2 3401.26  126.19
  -2  -3   2 3265.17  130.19
   2  -3  -2 3544.15  113.69
   2  -3  -2 3276.07  113.59
   2  -3  -2 3033.50  158.28
  -2  -3   2 3158.88  158.38
   2  -3  -2 3221.88  118.69
   2   3  -2 3176.38  158.38
  -2   3   2 3223.58  158.18
  -2   3   2 3180.38  158.18
  -2   3   2 3374.76  125.99
  -2   3   2 3129.99  121.99
  -2   3   2 3285.47  145.89
  -1  -3   2  530.75   27.20
   1  -3  -2  532.95   27.30
   1  -3  -2  554.54   27.30
  -1  -3   2  576.44   19.50
  -1  -3   2  544.15   22.70
  -1   3   2  583.84   21.90
   1   3  -2  518.55   27.20
  -1   3   2  502.85   27.20
   1   3  -2  550.54   25.10
  -1   3   2  583.34   25.20
   1   3  -2  563.04   25.30
  -1   3   2  509.25   27.20
   0  -3  -2   26.00    2.00
   0  -3   2   24.30    2.10
   0  -3   2   28.30    1.30
   0  -3   2   24.40    2.10
   0  -3  -2   27.30    2.30
   0  -3   2   26.20    1.30
   0  -3  -2   29.30    2.30
   0   3  -2   23.50    2.00
   0   3  -2   26.60    1.90
   0   3   2   24.80    2.10
   0   3  -2   24.90    1.90
   0   3   2   25.10    2.20
   0   3  -2   27.20    1.80
   0   3  -2   26.00    1.60
   0   3  -2   24.30    1.90
   0   3   2   25.10    2.30
  -1  -3  -2 1360.86   62.09
   1  -3   2 1350.36   54.09
   1  -3   2 1424.06   50.29
  -1  -3  -2 1401.46   55.49
   1  -3   2 1367.36   55.49
  -1   3  -2 1366.96   53.19
   1   3   2 1306.77   55.39
   1   3   2 1384.46   67.39
   1   3   2 1280.87   67.39
  -1   3  -2 1369.26   49.00
  -1   3  -2 1376.76   52.09
  -1   3  -2 1375.46   46.50
  -1   3  -2 1412.86   53.19
  -1   3  -2 1425.56   53.19
  -2  -3  -2  948.11   48.80
  -2  -3  -2  896.81   49.60
   2  -3   2 1011.90   40.40
   2  -3   2 1058.89   39.00
  -2  -3  -2 1003.90   40.40
   2  -3   2  969.10   48.40
   2  -3   2  992.70   36.30
   2   3   2  982.60   48.90
   2   3   2 1020.50   35.00
  -2   3  -2 1027.00   33.90
   2   3   2  970.80   40.30
  -2   3  -2  990.80   38.00
  -2   3  -2  988.90   38.80
  -2   3  -2 1002.20   35.70
   3  -3   2  224.58    9.60
  -3  -3  -2  200.78   11.70
  -3  -3  -2  211.08   11.10
  -3  -3  -2  212.18    9.60
   3   3   2  215.68    8.00
   3   3   2  220.78   11.30
  -3   3  -2  213.48    9.30
  -3   3  -2  205.08    8.50
  -3   3  -2  216.28    9.20
   3   3   2  201.08    9.40
  -3   3  -2  216.18    8.20
   3   3   2  223.98    7.90
  -4  -3  -2   42.80    2.60
  -4  -3  -2   41.40    3.00
  -4  -3  -2   42.00    2.30
  -4  -3  -2   39.30    2.10
   4  -3   2   43.90    2.70
  -4  -3  -2   36.40    2.20
  -4  -3  -2   40.40    2.60
  -4  -3  -2   37.30    3.50
   4   3   2   39.40    2.30
   4   3   2   39.60    1.90
   4   3   2   37.40    3.00
   4   3   2   38.30    2.00
  -4   3  -2   37.70    3.00
  -4   3  -2   40.50    2.80
   4   3   2   39.20    2.50
  -4   3  -2   44.40    2.60
  -4   3  -2   41.60    2.70
  -5  -3  -2    3.80    1.20
  -5  -3  -2    3.90    1.10
  -5  -3  -2    4.10    1.60
  -5  -3  -2    4.80    1.50
   5  -3   2    3.50    1.10
  -5  -3  -2    4.00    0.90
  -5   3  -2    3.30    1.20
   5   3   2    3.30    0.60
  -5   3  -2    4.90    1.50
   5   3   2    3.10    0.60
   5   3   2    5.80    1.10
  -5   3  -2    2.50    1.40
  -5   3  -2    4.40    1.30
   5   3   2    3.50    0.80
  -5   3  -2    5.00    1.60
  -6  -3  -2 1069.39   39.40
  -6  -3  -2 1136.89   43.00
  -6  -3  -2 1068.99   39.90
  -6  -3  -2 1080.99   44.90
   6  -3   2 1131.19   44.60
  -6  -3  -2 1088.49   55.49
   6   3   2 1096.09   38.50
   6   3   2 1132.69   38.50
  -6   3  -2 1037.10   42.40
   6   3   2 1048.50   38.40
  -6   3  -2 1065.79   43.30
  -6   3  -2 1096.49   37.80
  -6   3  -2 1151.08   55.49
   6   3   2 1030.00   40.40
  -6   3  -2 1032.90   39.80
   6   3   2 1096.89   43.60
  -7  -3  -2  370.36   16.70
  -7  -3  -2  354.96   14.20
  -7  -3  -2  394.96   20.80
  -7  -3  -2  365.36   15.80
  -7   3  -2  374.46   15.00
   7   3   2  369.66   15.80
   7   3   2  371.36   13.60
  -7   3  -2  403.66   20.70
  -7   3  -2  375.06   14.10
  -7   3  -2  342.47   16.10
  -7   3  -2  369.26   16.10
  -8  -3  -2  914.01   39.10
  -8  -3  -2  952.20   37.50
  -8  -3  -2  938.21   34.30
  -8  -3  -2  987.80   48.80
  -8   3  -2  903.31   32.90
   8   3   2  908.91   37.80
   8   3   2  928.81   33.10
  -8   3  -2  908.41   37.40
  -8   3  -2  860.41   37.70
  -8   3  -2  885.51   34.80
  -8   3  -2 1035.90   48.60
  -9  -3  -2  248.68    9.60
  -9  -3  -2  239.58   15.10
  -9  -3  -2  234.58    9.00
  -9  -3  -2  227.68   11.30
  -9   3  -2  236.88   10.20
  -9   3  -2  284.87   15.40
  -9   3  -2  250.47   12.00
   9   3   2  231.58   11.00
  -9   3  -2  239.08   11.00
  -9   3  -2  242.78   12.10
   9   3   2  239.38    9.30
  -9   3  -2  250.37   11.90
 -10  -3  -2  108.29    4.40
 -10  -3  -2  104.99    6.30
  10   3   2  106.39    4.70
 -10   3  -2  116.89    6.60
 -10   3  -2  115.09    7.00
 -10   3  -2  108.19    7.20
 -10   3  -2  104.99    6.40
  10   3   2   94.39    5.70
 -10   3  -2  105.99    5.80
  11  -3   2   54.69    2.60
 -11  -3  -2   58.49    2.70
 -11   3  -2   49.99    4.70
 -11   3  -2   53.79    5.30
 -11   3  -2   55.09    4.10
 -11   3  -2   63.69    4.70
 -11   3  -2   43.10    4.80
 -12  -3  -2   94.79    4.10
  12  -3   2   90.59    4.50
 -12   3  -2   92.69    7.50
 -12   3  -2  108.59    6.60
 -12   3  -2   91.99    6.50
 -12   3  -2   97.09    3.50
 -12   3  -2   92.79    7.00
 -13  -3  -2   91.79    3.30
 -13  -3  -2   85.09    3.80
 -13   3  -2   79.09    6.40
 -13   3  -2   89.39    3.40
 -13   3  -2   87.09    3.30
 -13   3  -2   95.19    6.30
 -13   3  -2   85.39    3.50
 -14  -3  -2   91.09    3.80
 -14  -3  -2   97.49    3.40
 -14   3  -2   89.79    6.50
 -14   3  -2   86.19    3.60
 -14   3  -2   89.89    3.40
 -14   3  -2   91.29    3.50
 -15  -3  -2   13.30    1.20
 -15   3  -2   12.60    1.20
 -15   3  -2   15.40    1.20
 -16  -3  -2   81.09    3.10
 -16   3  -2   76.69    3.10
 -16   3  -2   80.79    3.00
 -17  -3  -2   19.80    1.20
 -17   3  -2   21.10    1.30
 -17   3  -2   19.90    1.40
 -18  -3  -2   31.50    1.50
 -18   3  -2   30.00    1.50
 -18   3  -2   32.80    1.50
 -19  -3  -2    7.70    0.80
 -19   3  -2    5.30    0.60
 -19   3  -2    7.00    0.70
 -20  -4   2   34.40    1.40
 -20   4   2   30.50    1.40
 -19  -4   2    4.00    0.60
 -19   4   2    3.90    0.60
 -19   4   2    4.30    0.60
 -18  -4   2   55.59    2.30
 -18  -4   2   58.59    2.30
 -18   4   2   58.29    2.30
 -18   4   2   59.09    2.40
 -17  -4   2    6.80    0.70
 -17  -4   2    9.10    0.80
 -17   4   2    7.10    0.80
 -16  -4   2   36.80    1.80
 -16  -4   2   37.50    1.70
 -16  -4   2   36.50    1.80
 -16   4   2   38.00    1.90
 -16   4   2   38.20    1.80
 -15  -4   2   98.09    3.60
 -15  -4   2   98.39    3.60
 -15  -4   2   99.59    3.70
 -15   4   2  104.99    3.70
 -15   4   2   79.99    6.30
 -15   4   2  106.19    3.80
 -14  -4   2  174.88    6.00
 -14  -4   2  169.88    7.30
 -14  -4   2  174.48    6.10
 -14  -4   2  174.88    6.00
 -14   4   2  176.88    6.20
 -14   4   2  179.08    6.00
 -14   4   2  185.28    9.80
 -13  -4   2    8.60    1.30
 -13  -4   2    7.00    1.30
 -13  -4   2    4.60    0.70
 -13  -4   2    7.00    0.70
  13  -4  -2    5.10    1.40
 -13   4   2    8.20    0.90
 -13   4   2    5.90    2.10
 -13   4   2    3.90    2.50
 -12  -4   2  554.14   19.20
 -12  -4   2  574.14   21.20
  12  -4  -2  558.04   19.80
 -12  -4   2  562.44   19.90
  12  -4  -2  520.35   22.70
 -12   4   2  507.25   24.40
 -12   4   2  540.35   24.70
 -12   4   2  515.45   24.60
 -11  -4   2  271.27   11.10
  11  -4  -2  267.07   10.80
 -11  -4   2  248.18    9.60
  11  -4  -2  260.07    9.60
 -11  -4   2  261.27   10.00
  11  -4  -2  267.57    9.70
 -11  -4   2  247.48    9.70
 -11   4   2  277.67   13.70
 -11   4   2  264.37   12.70
 -11   4   2  256.87   13.30
 -10  -4   2   17.10    1.40
 -10  -4   2   18.50    1.60
  10  -4  -2   15.60    1.70
  10  -4  -2   17.10    1.00
 -10  -4   2   16.60    2.10
 -10  -4   2   19.40    3.50
  10  -4  -2   13.90    0.90
  10  -4  -2   19.10    1.70
 -10   4   2   16.90    2.60
 -10   4   2   18.50    3.00
 -10   4   2   23.00    3.60
 -10   4   2   20.00    3.50
   9  -4  -2   20.90    1.80
   9  -4  -2   31.30    2.00
  -9  -4   2   22.90    1.70
  -9  -4   2   30.70    4.20
  -9   4   2   20.60    2.90
  -9   4   2   25.20    3.60
  -9   4   2   24.60    3.40
   8  -4  -2  314.17   12.50
   8  -4  -2  321.87   12.60
  -8  -4   2  343.37   18.30
  -8   4   2  313.27   13.30
  -8   4   2  306.37   14.60
  -8   4   2  320.57   14.60
  -7  -4   2   68.29    4.60
  -7  -4   2   78.39    4.70
   7  -4  -2   73.19    3.60
   7  -4  -2   82.29    3.70
  -7  -4   2   82.99    6.10
  -7   4   2   78.09    5.20
  -7   4   2   77.99    3.30
  -7   4   2   74.49    4.50
  -7   4   2   83.29    4.70
  -7   4   2   81.79    5.10
   6  -4  -2  942.51   35.30
   6  -4  -2  941.91   35.40
  -6  -4   2  888.61   39.30
  -6   4   2  930.11   34.80
  -6   4   2  977.60   38.40
  -6   4   2  983.00   36.60
  -6   4   2  945.01   37.40
  -6   4   2 1009.20   35.10
   5  -4  -2  580.44   21.60
   5  -4  -2  564.84   20.20
   5  -4  -2  551.14   20.30
  -5  -4   2  544.95   24.20
   5  -4  -2  571.54   21.50
  -5   4   2  583.94   21.30
  -5   4   2  580.94   22.40
  -5   4   2  602.64   23.10
  -5   4   2  589.94   21.50
  -4  -4   2  964.50   37.10
   4  -4  -2  963.10   32.80
   4  -4  -2  904.91   46.10
   4  -4  -2  947.81   34.60
   4  -4  -2  973.10   34.50
  -4  -4   2  909.41   38.30
   4  -4  -2  888.61   32.80
  -4  -4   2  863.81   46.20
   4   4  -2  907.91   46.30
  -4   4   2  916.21   34.10
  -4   4   2  960.60   36.30
  -4   4   2  904.11   36.30
  -4   4   2  958.10   35.40
  -4   4   2  928.41   33.80
  -4   4   2  975.70   36.20
   3  -4  -2  950.50   35.40
   3  -4  -2  960.50   33.70
  -3  -4   2  943.51   39.20
  -3  -4   2  864.11   47.30
   3  -4  -2  946.91   33.70
   3  -4  -2  900.01   47.20
  -3  -4   2 1000.40   38.00
  -3   4   2  942.81   43.00
  -3   4   2  945.31   37.50
   3   4  -2  933.71   47.30
  -3   4   2 1015.50   46.80
  -3   4   2 1014.70   36.90
  -3   4   2  938.91   34.40
  -3   4   2 1007.00   46.80
  -3   4   2  942.61   43.00
  -3   4   2  966.20   37.50
  -2  -4   2  933.91   49.90
  -2  -4   2 1012.70   39.90
   2  -4  -2  952.70   49.80
   2  -4  -2  931.41   35.60
   2  -4  -2 1067.79   35.70
  -2  -4   2 1035.20   41.30
   2  -4  -2 1055.29   40.90
  -2   4   2 1028.50   45.80
  -2   4   2  998.90   49.60
  -2   4   2 1085.29   45.90
   2   4  -2 1055.99   46.10
  -2   4   2 1029.00   39.70
   2   4  -2  948.71   49.80
   2   4  -2  976.00   46.20
  -2   4   2 1020.60   38.60
  -2   4   2  984.60   39.70
  -2   4   2 1020.80   49.60
  -1  -4   2  243.98   12.80
   1  -4  -2  240.08   12.80
   1  -4  -2  252.47   10.60
  -1  -4   2  244.98    9.10
   1  -4  -2  245.28    9.10
  -1  -4   2  243.88   10.90
   1  -4  -2  249.08   12.90
  -1   4   2  244.48   10.40
   1   4  -2  254.97   11.80
  -1   4   2  252.47   11.80
   1   4  -2  240.48   12.70
   1   4  -2  255.67   12.00
  -1   4   2  255.27   10.00
   1   4  -2  231.68    8.70
  -1   4   2  231.58   12.60
  -1   4   2  228.48   12.70
   0  -4   2  963.30   38.50
   0  -4   2  907.81   33.20
   0  -4   2  966.40   33.20
   0  -4  -2  922.81   46.50
   0  -4  -2  989.00   38.30
   0  -4   2  926.31   34.80
   0   4  -2  915.01   46.20
   0   4  -2  964.10   33.80
   0   4   2  957.90   46.50
   0   4   2  978.10   37.30
   0   4  -2  908.11   37.00
   0   4  -2  924.81   46.10
   0   4  -2  981.60   42.60
   0   4   2  865.71   38.30
   0   4  -2  911.21   36.80
   0   4   2  965.00   35.80
   0   4  -2  920.61   32.00
   0   4  -2  918.41   42.70
   1  -4   2  100.89    3.70
   1  -4   2  102.59    3.70
   1  -4   2  104.39    5.20
  -1  -4  -2  104.19    5.10
   1  -4   2   99.19    4.50
  -1  -4  -2   89.39    5.80
   1  -4   2   94.49    4.10
   1   4   2   95.99    5.80
  -1   4  -2  100.09    4.20
  -1   4  -2  103.19    4.30
  -1   4  -2   99.49    4.90
  -1   4  -2   99.09    4.50
  -1   4  -2  103.79    5.00
   1   4   2  100.89    6.00
   1   4   2   95.49    5.00
   1   4   2  103.99    5.00
  -1   4  -2   98.29    4.40
  -2  -4  -2  438.36   23.30
   2  -4   2  486.35   17.30
   2  -4   2  481.55   19.50
   2  -4   2  475.65   18.60
  -2  -4  -2  480.05   19.60
   2   4   2  418.36   23.40
   2   4   2  448.96   23.40
  -2   4  -2  452.85   17.20
  -2   4  -2  466.15   18.50
  -2   4  -2  463.45   18.80
   2   4   2  461.75   16.60
   2   4   2  439.66   19.40
  -2   4  -2  481.45   16.40
  -3  -4  -2  108.49    7.20
  -3  -4  -2  124.29    6.10
  -3  -4  -2  114.99    6.70
   3  -4   2  120.69    4.70
   3  -4   2  114.09    5.80
   3  -4   2  125.09    5.00
   3   4   2  124.59    4.70
  -3   4  -2  112.79    5.00
  -3   4  -2  116.59    5.80
  -3   4  -2  121.99    5.90
  -3   4  -2  125.39    5.40
   3   4   2  110.99    6.80
   3   4   2  106.29    5.60
   4  -4   2 1315.47   51.29
  -4  -4  -2 1319.97   49.40
   4  -4   2 1246.48   46.00
  -4  -4  -2 1286.27   61.99
  -4  -4  -2 1313.07   51.59
  -4  -4  -2 1200.48   63.49
  -4  -4  -2 1188.48   46.20
   4   4   2 1269.17   44.50
  -4   4  -2 1277.67   45.60
  -4   4  -2 1249.47   49.60
  -4   4  -2 1284.67   43.40
  -4   4  -2 1234.28   48.60
   4   4   2 1178.58   50.29
  -5  -4  -2   95.89    4.80
  -5  -4  -2  110.49    5.40
  -5  -4  -2  109.09    5.80
  -5  -4  -2  106.39    7.20
   5  -4   2  113.39    5.50
  -5  -4  -2  109.69    5.90
   5   4   2  102.79    5.30
  -5   4  -2  104.99    5.80
  -5   4  -2  111.29    5.30
  -5   4  -2  103.69    5.00
   5   4   2  100.19    4.40
  -5   4  -2  105.59    5.80
  -6  -4  -2    2.90    1.30
  -6  -4  -2    2.60    1.60
  -6  -4  -2    0.90    0.90
  -6  -4  -2    0.80    1.70
  -6   4  -2    3.40    1.50
   6   4   2    3.00    1.20
  -6   4  -2    2.30    1.40
  -6   4  -2    0.40    1.30
   6   4   2    1.80    0.70
  -6   4  -2    1.90    1.70
  -7  -4  -2    7.00    1.70
  -7  -4  -2    7.00    2.00
  -7  -4  -2    4.80    1.10
  -7  -4  -2    6.50    2.30
  -7   4  -2    4.90    1.60
   7   4   2    5.10    1.30
  -7   4  -2    8.30    2.10
  -7   4  -2    3.70    1.40
  -7   4  -2    5.60    1.90
   7   4   2    6.60    1.00
  -8  -4  -2  887.61   38.70
  -8  -4  -2  931.41   37.00
  -8  -4  -2  947.01   48.10
  -8  -4  -2  887.11   32.20
  -8  -4  -2  940.21   34.10
  -8   4  -2  881.71   36.90
   8   4   2  948.71   32.80
  -8   4  -2  897.31   37.50
  -8   4  -2  919.21   32.70
  -8   4  -2  896.31   34.40
  -9  -4  -2   76.79    3.00
  -9  -4  -2   76.09    3.90
  -9  -4  -2   71.39    4.80
  -9  -4  -2   81.29    3.50
  -9  -4  -2   86.19    7.20
  -9   4  -2   74.39    4.60
  -9   4  -2   78.29    5.70
  -9   4  -2   68.69    5.60
  -9   4  -2   76.89    5.10
  -9   4  -2   73.49    5.00
 -10  -4  -2  143.99    6.00
 -10  -4  -2  135.69    5.50
 -10   4  -2  133.19    7.00
 -10   4  -2  140.49    8.30
 -10   4  -2  134.69    7.50
 -10   4  -2  125.79    7.70
 -10   4  -2  131.79    8.40
 -11  -4  -2  219.38    8.20
 -11  -4  -2  201.58    7.50
 -11   4  -2  222.18   11.20
 -11   4  -2  215.08   10.60
 -11   4  -2  210.78   11.60
 -11   4  -2  198.68   11.70
 -11   4  -2  199.68    9.70
 -12  -4  -2   11.70    1.30
 -12  -4  -2   12.20    0.80
 -12   4  -2    4.40    2.90
 -12   4  -2    5.60    2.60
 -12   4  -2   13.60    2.80
 -12   4  -2   12.40    1.00
 -12   4  -2   14.30    3.20
 -13  -4  -2   30.40    2.10
 -13  -4  -2   35.70    1.70
 -13  -4  -2   33.90    1.50
 -13   4  -2   36.60    1.80
 -13   4  -2   33.50    1.70
 -13   4  -2   37.30    4.00
 -13   4  -2   33.70    1.80
 -14  -4  -2   37.30    1.80
 -14  -4  -2   35.70    2.20
 -14   4  -2   38.00    1.80
 -14   4  -2   36.40    1.90
 -14   4  -2   37.80    1.90
 -14   4  -2   33.90    4.30
 -15  -4  -2    8.60    0.90
 -15   4  -2    7.60    2.70
 -15   4  -2    7.00    0.80
 -15   4  -2    6.30    0.80
 -16  -4  -2  277.57    9.00
 -16   4  -2  268.77    9.00
 -16   4  -2  267.37    9.20
 -17  -4  -2    0.50    0.50
 -17   4  -2    0.30    0.60
 -17   4  -2    1.70    0.60
 -18  -4  -2   18.90    1.10
 -18   4  -2   19.20    1.10
 -18   4  -2   18.20    1.20
 -19  -4  -2    0.40    0.40
 -19   4  -2    0.90    0.40
 -20  -5   2   78.99    2.80
 -19  -5   2    5.10    0.60
 -19   5   2    3.50    0.60
 -18  -5   2   89.49    3.40
 -18  -5   2   98.49    3.40
 -18   5   2   92.79    3.40
 -18   5   2  101.39    3.60
 -17  -5   2   18.90    1.20
 -17  -5   2   20.50    1.20
 -17   5   2   19.30    1.30
 -17   5   2   20.10    1.30
 -16  -5   2    1.30    0.60
 -16  -5   2    0.70    0.50
 -16   5   2    1.10    0.60
 -16   5   2    1.30    1.80
 -16   5   2    0.50    0.60
 -15  -5   2  280.47    9.50
 -15  -5   2  282.27    9.50
 -15   5   2  283.17    9.70
 -15   5   2  295.87    9.50
 -15   5   2  296.97   14.40
 -14  -5   2    1.50    1.10
 -14  -5   2    3.10    0.60
 -14  -5   2    2.60    0.60
 -14   5   2    0.40    1.70
 -14   5   2    1.70    0.70
 -14   5   2    2.50    0.70
 -13  -5   2    5.50    1.20
 -13  -5   2    4.30    0.40
 -13  -5   2    4.20    0.60
 -13  -5   2    4.80    1.40
  13  -5  -2    4.30    1.30
 -13   5   2    0.40    1.60
 -13   5   2    2.40    0.70
 -12  -5   2   -0.30    0.50
 -12  -5   2   -1.30    1.00
 -12  -5   2    0.40    0.90
 -12  -5   2    1.50    0.60
 -12  -5   2    0.10    0.60
 -12   5   2    1.70    1.60
 -12   5   2    1.70    2.60
 -12   5   2    0.70    0.60
  11  -5  -2   16.00    1.80
 -11  -5   2   15.80    1.40
 -11  -5   2   16.00    1.70
  11  -5  -2   12.90    1.70
  11  -5  -2   18.00    1.30
 -11   5   2   15.60    3.40
 -11   5   2   20.50    2.70
 -11   5   2   15.50    2.90
 -10  -5   2   46.80    2.50
 -10  -5   2   47.40    5.50
  10  -5  -2   44.40    2.80
  10  -5  -2   44.80    2.20
  10  -5  -2   46.30    2.10
  10  -5  -2   48.10    3.00
 -10  -5   2   48.50    2.60
 -10   5   2   44.40    4.10
 -10   5   2   45.60    4.70
 -10   5   2   47.10    3.80
   9  -5  -2  210.38    7.50
   9  -5  -2  191.98    8.50
  -9  -5   2  226.78   13.20
  -9  -5   2  204.48    7.90
   9  -5  -2  194.48    8.40
   9  -5  -2  195.38    7.40
  -9   5   2  210.78    9.70
  -9   5   2  188.18   10.50
   8  -5  -2  734.33   25.80
   8  -5  -2  718.33   27.60
   8  -5  -2  748.63   25.90
  -8  -5   2  707.63   31.30
  -8  -5   2  792.92   38.90
   8  -5  -2  713.23   27.70
  -8   5   2  714.03   30.10
  -8   5   2  726.83   28.00
  -7  -5   2  104.39    7.40
   7  -5  -2  105.49    4.70
   7  -5  -2   95.89    3.80
  -7  -5   2   93.09    5.80
   7  -5  -2   96.39    4.50
   7  -5  -2  102.99    3.90
  -7   5   2   97.09    5.40
  -7   5   2  105.99    4.20
  -7   5   2  105.79    5.60
  -7   5   2   93.89    6.00
  -6  -5   2 1156.18   51.49
   6  -5  -2 1312.27   46.40
   6  -5  -2 1266.77   44.00
   6  -5  -2 1182.08   46.40
   6  -5  -2 1267.97   44.00
  -6   5   2 1253.17   45.60
  -6   5   2 1195.68   48.70
  -6   5   2 1305.77   45.70
  -6   5   2 1306.37   47.70
  -5  -5   2   97.59    5.70
   5  -5  -2  102.49    4.00
   5  -5  -2  100.29    4.60
   5  -5  -2  100.89    4.10
  -5   5   2  103.19    5.70
  -5   5   2  114.29    5.10
  -5   5   2  108.49    4.50
  -5   5   2  102.89    5.30
   4  -5  -2   30.10    1.60
   4  -5  -2   30.60    2.00
   4  -5  -2   30.10    1.60
  -4  -5   2   32.60    2.60
  -4  -5   2   31.30    2.80
  -4   5   2   33.00    1.80
  -4   5   2   33.90    1.80
  -4   5   2   34.20    2.00
  -4   5   2   35.70    2.40
  -4   5   2   37.20    2.90
   4   5  -2   30.60    2.90
   3  -5  -2  767.32   27.80
   3  -5  -2  737.83   27.90
   3  -5  -2  814.42   32.10
  -3  -5   2  792.32   32.70
  -3  -5   2  812.52   31.60
   3  -5  -2  799.22   29.30
  -3   5   2  776.12   31.00
  -3   5   2  850.61   38.60
   3   5  -2  754.32   39.20
  -3   5   2  819.52   30.70
  -3   5   2  764.02   31.00
  -3   5   2  731.43   35.40
  -3   5   2  780.02   28.40
  -3   5   2  765.02   35.40
  -3   5   2  737.83   29.00
  -3   5   2  840.12   38.60
   2  -5  -2  899.41   36.10
  -2  -5   2  831.32   44.00
   2  -5  -2  819.12   32.90
  -2  -5   2  889.41   36.50
   2  -5  -2  820.22   44.00
  -2  -5   2  911.01   35.30
  -2   5   2  880.11   40.20
  -2   5   2  920.01   35.10
  -2   5   2  921.41   40.40
  -2   5   2  949.31   43.70
  -2   5   2  891.21   43.60
   2   5  -2  838.12   43.90
  -2   5   2  914.11   34.20
   2   5  -2  899.21   40.70
  -2   5   2  856.31   34.90
  -1  -5   2   58.79    2.80
   1  -5  -2   58.29    4.00
  -1  -5   2   55.59    4.00
   1  -5  -2   55.29    2.80
   1  -5  -2   61.09    4.20
   1  -5  -2   64.59    3.50
  -1  -5   2   64.79    3.80
  -1   5   2   65.19    3.50
   1   5  -2   59.39    2.80
  -1   5   2   51.69    3.90
  -1   5   2   63.29    3.80
   1   5  -2   63.59    3.10
   1   5  -2   64.89    4.00
  -1   5   2   47.90    3.30
  -1   5   2   63.29    3.50
  -1   5   2   62.69    3.70
  -1   5   2   64.39    3.90
   1   5  -2   65.69    3.70
   0  -5   2   14.90    1.40
   0  -5  -2   16.60    1.90
   0  -5   2   19.40    1.30
   0  -5  -2   16.70    2.00
   0  -5   2   17.50    2.10
   0  -5   2   14.70    1.20
   0   5   2   18.60    2.00
   0   5  -2   14.90    1.40
   0   5  -2   18.10    1.80
   0   5   2   14.80    1.90
   0   5  -2   18.30    1.70
   0   5  -2   16.20    1.70
   0   5   2   15.80    1.80
   0   5  -2   16.00    1.70
   0   5  -2   22.00    1.80
   0   5  -2   16.00    1.50
   0   5   2   15.30    1.70
   1  -5   2  917.31   36.90
   1  -5   2  977.20   38.10
  -1  -5  -2  868.11   46.00
   1  -5   2  915.51   32.70
   1  -5   2  907.11   34.30
   1  -5   2  944.91   32.60
  -1  -5  -2 1003.20   38.10
  -1   5  -2  852.31   36.30
  -1   5  -2  908.01   36.70
  -1   5  -2  896.01   36.20
  -1   5  -2  946.81   33.50
   1   5   2  912.91   45.90
  -1   5  -2 1006.50   35.90
   1   5   2  851.21   46.00
  -1   5  -2  945.81   31.80
   1   5   2  933.91   36.90
   2  -5   2   30.40    1.40
   2  -5   2   40.00    2.80
   2  -5   2   33.60    1.80
   2  -5   2   33.30    2.00
  -2  -5  -2   35.40    2.70
   2  -5   2   33.60    1.40
  -2   5  -2   35.90    2.80
   2   5   2   28.30    3.00
  -2   5  -2   41.60    3.00
  -2   5  -2   33.70    2.30
   2   5   2   32.10    2.80
  -2   5  -2   33.60    2.30
   3  -5   2   83.29    3.60
   3  -5   2   85.69    4.70
  -3  -5  -2   84.09    4.80
   3  -5   2   88.19    4.00
  -3   5  -2   82.49    4.10
  -3   5  -2   88.19    4.40
  -3   5  -2   81.49    4.90
  -3   5  -2   87.19    4.90
   4  -5   2   14.30    1.80
   4  -5   2   11.00    1.10
  -4  -5  -2   11.50    2.30
   4  -5   2   13.00    1.00
  -4  -5  -2   12.30    2.10
  -4   5  -2   12.40    1.80
  -4   5  -2   14.60    2.30
  -4   5  -2   13.40    1.90
  -4   5  -2   15.00    2.40
   5  -5   2  115.49    5.10
  -5  -5  -2  129.09    8.20
   5  -5   2  113.19    4.70
  -5  -5  -2  131.99    6.10
  -5  -5  -2  117.29    6.60
   5  -5   2  120.19    6.10
  -5   5  -2  116.49    5.60
  -5   5  -2  120.99    6.50
  -5   5  -2  115.69    6.40
  -5   5  -2  120.89    5.90
  -6  -5  -2  129.29    6.50
  -6  -5  -2  142.69    9.10
  -6  -5  -2  133.99    7.30
   6  -5   2  126.89    5.00
  -6   5  -2  131.29    7.20
  -6   5  -2  121.89    7.00
  -6   5  -2  123.19    6.40
  -6   5  -2  127.09    6.10
   7  -5   2  120.59    4.80
  -7  -5  -2  132.49    6.50
  -7  -5  -2  118.99    7.10
  -7  -5  -2  128.09    9.00
  -7   5  -2  119.09    7.10
  -7   5  -2  123.09    6.10
  -7   5  -2  113.19    6.30
  -7   5  -2  122.39    7.10
  -8  -5  -2  233.68    9.20
  -8  -5  -2  251.87   15.30
  -8  -5  -2  224.18   12.10
  -8  -5  -2  230.38   11.20
   8  -5   2  248.98    9.20
  -8  -5  -2  252.27   10.20
  -8   5  -2  252.67   11.00
  -8   5  -2  238.78   12.00
  -8   5  -2  252.37   12.10
  -8   5  -2  242.38   10.40
  -9  -5  -2  347.97   13.30
  -9  -5  -2  335.07   12.00
  -9  -5  -2  290.67   15.60
   9  -5   2  329.97   12.30
  -9  -5  -2  314.87   12.20
  -9   5  -2  318.37   13.50
  -9   5  -2  323.17   14.30
  -9   5  -2  340.97   15.70
  -9   5  -2  352.16   15.90
  -9   5  -2  324.57   15.60
 -10  -5  -2  323.37   11.50
 -10  -5  -2  349.27   13.00
  10  -5   2  312.77   12.00
 -10  -5  -2  309.97   12.00
 -10  -5  -2  324.47   11.40
 -10   5  -2  320.07   15.80
 -10   5  -2  307.67   15.60
 -10   5  -2  319.27   14.30
 -10   5  -2  305.77   15.40
 -10   5  -2  311.47   13.40
 -11  -5  -2   54.19    3.10
 -11  -5  -2   53.39    2.30
 -11  -5  -2   57.19    2.90
 -11   5  -2   52.59    2.20
 -11   5  -2   49.30    4.60
 -11   5  -2   61.99    5.10
 -11   5  -2   49.20    5.60
 -11   5  -2   52.99    4.50
 -11   5  -2   58.49    5.60
 -12  -5  -2   81.09    2.90
 -12  -5  -2   84.89    3.90
 -12   5  -2   69.59    5.90
 -12   5  -2   75.89    7.40
 -12   5  -2   68.19    5.50
 -12   5  -2   79.09    3.30
 -12   5  -2   89.69    6.10
 -12   5  -2   86.19    7.30
 -12   5  -2   78.59    3.10
 -13  -5  -2   -0.70    0.50
 -13  -5  -2   -0.30    0.80
 -13  -5  -2    0.60    0.40
 -13   5  -2   -0.20    0.60
 -13   5  -2    1.00    0.60
 -13   5  -2    0.80    1.90
 -13   5  -2   -1.10    0.60
 -14  -5  -2  292.47    9.50
 -14  -5  -2  274.97    9.40
 -14  -5  -2  297.67   10.90
 -14   5  -2  296.87   14.70
 -14   5  -2  287.87    9.70
 -14   5  -2  271.37    9.50
 -15  -5  -2    6.80    1.00
 -15  -5  -2    7.20    0.80
 -15  -5  -2    6.20    0.70
 -15   5  -2    4.10    0.80
 -15   5  -2    3.90    2.30
 -15   5  -2    5.40    0.80
 -16  -5  -2    0.50    0.60
 -16   5  -2   -0.40    0.60
 -16   5  -2    0.50    0.60
 -17  -5  -2    6.30    0.70
 -17   5  -2    5.00    0.80
 -17   5  -2    5.50    0.70
 -18  -5  -2   -0.60    0.40
 -18   5  -2    0.30    0.50
 -18   5  -2    0.70    0.50
 -19  -5  -2    2.50    0.40
 -19  -6   2    5.10    0.50
 -19  -6   2    5.20    0.50
 -19   6   2    5.30    0.60
  19   6  -2    4.80    0.60
 -18  -6   2   14.40    1.00
 -18  -6   2   14.10    1.00
 -18   6   2   16.20    1.20
 -17  -6   2    3.40    0.60
 -17  -6   2    5.80    0.70
 -17   6   2    3.00    0.60
 -17   6   2    3.30    0.70
 -16  -6   2   34.20    1.60
 -16  -6   2   31.90    1.60
 -16   6   2   36.80    4.00
 -16   6   2   35.30    1.70
 -16   6   2   32.30    1.70
 -15  -6   2    2.30    1.10
 -15  -6   2    0.70    0.50
 -15  -6   2    0.90    0.60
 -15   6   2    1.60    1.80
 -15   6   2    2.70    0.70
 -15   6   2    1.10    0.70
 -14  -6   2   38.40    2.80
 -14  -6   2   39.90    1.80
 -14  -6   2   42.90    1.80
 -14   6   2   41.40    4.10
 -14   6   2   36.90    1.90
 -14   6   2   39.40    1.90
 -13  -6   2   11.70    1.00
 -13  -6   2   12.60    1.70
 -13  -6   2   10.60    1.00
 -13  -6   2   11.50    2.00
 -13  -6   2   11.10    0.70
 -13   6   2   11.30    1.00
 -13   6   2   11.70    1.10
 -13   6   2   17.10    2.90
 -12  -6   2   59.99    3.40
 -12  -6   2   65.79    2.90
 -12  -6   2   60.39    2.20
 -12  -6   2   57.69    2.40
 -12   6   2   65.29    4.90
 -12   6   2   59.29    6.30
 -12   6   2   61.59    2.50
 -11  -6   2   19.00    1.90
  11  -6  -2   21.50    2.10
  11  -6  -2   17.20    1.40
 -11  -6   2   17.80    1.60
 -11   6   2   20.10    3.00
 -11   6   2   19.10    3.70
  10  -6  -2  642.24   25.30
 -10  -6   2  652.63   23.90
  10  -6  -2  661.63   23.70
 -10   6   2  668.93   26.30
 -10   6   2  674.63   28.60
 -10   6   2  662.53   29.20
  -9  -6   2   90.39    4.30
   9  -6  -2   94.89    4.60
   9  -6  -2   97.19    3.90
   9  -6  -2   89.59    3.80
  -9  -6   2  104.69    8.00
  -9   6   2   93.99    6.60
  -9   6   2   86.09    5.70
  -9   6   2   90.19    5.60
   8  -6  -2  713.93   28.90
   8  -6  -2  753.72   27.30
   8  -6  -2  796.22   27.30
  -8  -6   2  813.32   40.90
  -8  -6   2  725.43   32.90
  -8   6   2  782.32   31.70
  -8   6   2  791.92   29.40
  -7  -6   2 2372.36  103.39
   7  -6  -2 2583.84   93.59
   7  -6  -2 2566.94   89.19
   7  -6  -2 2668.03   89.29
  -7   6   2 2494.55   91.39
  -7   6   2 2557.44   97.59
  -6  -6   2 1156.58   50.49
   6  -6  -2 1184.38   43.00
   6  -6  -2 1205.98   42.90
   6  -6  -2 1259.77   45.30
  -6   6   2 1275.07   44.60
  -6   6   2 1171.18   44.50
  -6   6   2 1227.78   47.80
  -6   6   2 1249.88   46.60
   5  -6  -2   44.50    2.00
   5  -6  -2   38.40    2.10
   5  -6  -2   40.70    2.50
  -5  -6   2   38.90    3.50
  -5   6   2   38.20    3.10
  -5   6   2   39.40    2.90
  -5   6   2   34.90    3.50
  -5   6   2   39.70    2.40
  -4  -6   2 2020.60   80.79
   4  -6  -2 1844.32   69.89
   4  -6  -2 2055.59   73.19
  -4   6   2 2087.49   70.99
  -4   6   2 1959.50   72.29
  -4   6   2 2044.10   75.99
  -4   6   2 1933.31   77.09
  -4   6   2 1944.01   77.09
  -3  -6   2  152.88    7.60
   3  -6  -2  149.69    6.90
   3  -6  -2  140.19    5.70
  -3   6   2  135.59    6.70
  -3   6   2  154.58    7.60
  -3   6   2  152.28    7.10
   3   6  -2  135.99    8.40
  -3   6   2  145.99    6.50
  -3   6   2  135.19    6.40
  -3   6   2  134.79    6.70
  -3   6   2  156.58    7.60
  -3   6   2  143.09    6.00
   2  -6  -2  225.08    8.80
  -2  -6   2  243.38   10.90
   2  -6  -2  246.78   10.40
  -2   6   2  241.68   10.20
  -2   6   2  245.58   12.20
  -2   6   2  225.68   10.00
  -2   6   2  230.18   12.10
   2   6  -2  229.88   12.50
   2   6  -2  217.58   11.60
   2   6  -2  222.48   11.80
  -2   6   2  238.68   11.30
  -2   6   2  208.68   11.10
   1  -6  -2   15.90    2.00
  -1  -6   2   16.20    2.30
  -1   6   2   14.80    2.00
   1   6  -2   14.60    1.90
   1   6  -2   14.10    1.50
  -1   6   2   16.00    1.90
  -1   6   2   13.40    1.80
   1   6  -2   17.30    2.10
  -1   6   2   14.70    1.90
   1   6  -2   13.90    1.90
   1   6  -2   13.20    1.50
  -1   6   2   11.60    1.80
   0  -6   2   13.50    1.20
   0  -6   2   16.60    2.20
   0  -6  -2   14.80    2.00
   0   6  -2   13.10    1.50
   0   6   2   14.60    2.10
   0   6   2   22.40    2.20
   0   6   2   15.20    2.00
   0   6  -2   14.10    1.50
   0   6   2   14.00    2.10
   0   6  -2   13.60    1.70
   0   6  -2   14.50    1.70
   0   6   2   16.80    2.00
   0   6  -2   15.40    2.00
   0   6  -2   13.10    1.70
   0   6  -2   18.00    1.90
   0   6  -2   16.30    1.70
  -1  -6  -2   39.70    2.90
   1  -6   2   35.80    2.20
   1  -6   2   35.50    1.90
   1  -6   2   33.80    1.90
   1  -6   2   40.50    3.00
  -1   6  -2   35.70    3.00
   1   6   2   32.70    3.00
  -1   6  -2   36.20    2.40
  -1   6  -2   32.40    2.20
   1   6   2   37.40    3.00
  -1   6  -2   39.10    2.60
  -1   6  -2   37.20    2.40
  -2  -6  -2    3.00    1.30
   2  -6   2    3.40    0.60
   2  -6   2    4.20    1.40
   2  -6   2    2.70    0.70
   2  -6   2    3.10    0.60
  -2   6  -2    1.40    1.20
  -2   6  -2    4.90    1.50
  -2   6  -2    5.00    1.30
  -2   6  -2    4.60    1.70
   3  -6   2  267.17    9.70
  -3  -6  -2  291.97   12.70
   3  -6   2  279.77   11.50
   3  -6   2  281.57   12.30
   3  -6   2  265.77   10.60
   3  -6   2  263.07    9.70
  -3   6  -2  275.87   11.00
  -3   6  -2  275.07   12.10
  -3   6  -2  262.87   10.50
  -3   6  -2  246.18   12.20
   4  -6   2  628.04   25.50
   4  -6   2  635.64   26.60
  -4  -6  -2  666.73   33.30
  -4  -6  -2  654.93   27.20
   4  -6   2  634.24   23.60
  -4   6  -2  588.94   26.20
  -4   6  -2  621.04   22.70
  -4   6  -2  630.34   23.80
  -4   6  -2  616.04   25.60
   5  -6   2   28.30    2.60
   5  -6   2   30.00    1.70
  -5  -6  -2   30.50    4.10
  -5  -6  -2   34.40    2.70
   5  -6   2   28.00    1.90
  -5  -6  -2   27.10    3.10
  -5   6  -2   23.80    3.30
  -5   6  -2   27.80    2.80
  -5   6  -2   24.40    3.20
  -5   6  -2   29.80    2.80
  -6  -6  -2  108.09    6.80
   6  -6   2  118.09    4.90
  -6  -6  -2  124.69    8.70
  -6  -6  -2  120.09    6.20
   6  -6   2  118.79    5.40
  -6   6  -2  123.89    6.20
  -6   6  -2  117.09    6.90
  -6   6  -2  121.79    6.00
  -6   6  -2  114.49    7.00
  -7  -6  -2   86.19    6.10
  -7  -6  -2   91.89    4.20
  -7  -6  -2   88.39    5.40
   7  -6   2   94.79    4.40
   7  -6   2   98.39    4.10
  -7  -6  -2   94.69    7.70
  -7   6  -2   93.59    5.40
  -7   6  -2   94.59    6.30
  -7   6  -2  101.99    5.70
  -7   6  -2  102.79    6.40
  -7   6  -2  102.19    5.40
  -8  -6  -2   33.90    3.80
  -8  -6  -2   37.00    5.10
   8  -6   2   37.10    2.00
   8  -6   2   40.30    2.20
  -8  -6  -2   39.40    2.30
  -8   6  -2   38.60    4.30
  -8   6  -2   34.90    3.40
  -8   6  -2   36.10    4.20
  -8   6  -2   34.30    3.40
  -8   6  -2   36.20    3.70
   9  -6   2  333.77   12.50
  -9  -6  -2  323.17   12.20
  -9  -6  -2  295.27   15.90
  -9  -6  -2  326.47   12.30
  -9   6  -2  319.27   15.80
  -9   6  -2  335.57   15.80
  -9   6  -2  331.07   13.80
  -9   6  -2  341.57   16.30
  -9   6  -2  351.76   14.70
 -10  -6  -2  434.26   15.50
 -10  -6  -2  412.06   15.50
 -10  -6  -2  432.46   15.90
 -10  -6  -2  428.06   14.90
  10  -6   2  436.96   17.50
 -10  -6  -2  452.75   17.20
  10  -6   2  424.76   16.20
 -10   6  -2  430.26   20.40
 -10   6  -2  401.46   19.90
 -10   6  -2  405.16   18.20
 -10   6  -2  448.86   17.50
 -10   6  -2  426.06   20.10
 -11  -6  -2    1.30    1.00
 -11  -6  -2    1.00    0.30
 -11  -6  -2    2.00    0.90
 -11  -6  -2    1.30    0.60
 -11  -6  -2    0.70    0.40
 -11   6  -2    3.40    2.10
 -11   6  -2    2.30    2.50
 -11   6  -2    2.30    2.00
 -11   6  -2    2.20    0.60
 -11   6  -2    3.70    2.10
 -11   6  -2    0.10    2.20
 -12  -6  -2  335.47   11.20
 -12  -6  -2  335.97   12.90
 -12  -6  -2  336.27   11.20
 -12  -6  -2  351.36   13.40
 -12  -6  -2  347.07   12.00
 -12   6  -2  369.76   17.00
 -12   6  -2  335.57   11.40
 -12   6  -2  324.77   11.20
 -13  -6  -2    9.80    1.00
 -13  -6  -2   12.70    1.50
 -13  -6  -2    9.90    0.90
 -13   6  -2   12.60    2.80
 -13   6  -2   11.50    1.20
 -13   6  -2   11.40    1.00
 -14  -6  -2   92.09    3.50
 -14  -6  -2  104.69    4.50
 -14  -6  -2   98.49    3.50
 -14   6  -2   95.29    3.70
 -14   6  -2   89.99    3.50
 -14   6  -2   93.29    6.60
 -15  -6  -2  146.79    5.00
 -15  -6  -2  146.29    5.10
 -15  -6  -2  143.79    6.00
 -15   6  -2  147.09    5.10
 -15   6  -2  139.99    5.20
 -15   6  -2  152.48    8.90
 -16  -6  -2    0.80    0.60
 -16  -6  -2    0.40    0.50
 -16   6  -2    0.70    0.60
 -16   6  -2    0.00    0.60
 -16   6  -2    2.80    2.10
 -17  -6  -2    0.10    0.50
 -17   6  -2    0.90    0.60
 -17   6  -2   -0.30    0.50
 -18  -6  -2   29.30    1.30
 -18   6  -2   28.10    1.40
 -19  -6  -2   13.40    0.80
  19   7  -2   23.60    1.20
 -19   7   2   21.60    1.20
 -18  -7   2    0.40    0.40
 -18   7   2    0.60    0.50
  18   7  -2    0.10    0.50
 -17  -7   2    1.60    0.60
 -17  -7   2    1.80    0.50
 -17   7   2    3.10    0.70
 -17   7   2    0.70    1.70
  17   7  -2    2.90    0.60
  17   7  -2    1.00    0.60
 -16  -7   2    0.70    0.50
 -16  -7   2    0.80    0.50
 -16   7   2    0.00    1.60
  16   7  -2    1.00    0.60
 -16   7   2    0.50    0.60
 -15  -7   2    3.50    1.20
 -15  -7   2    5.10    0.70
  15   7  -2    3.10    0.70
 -15   7   2    5.80    2.20
 -15   7   2    4.60    0.80
 -15   7   2    5.00    0.80
 -14  -7   2   86.79    3.30
 -14  -7   2   85.29    4.50
 -14   7   2   88.79    6.20
  14   7  -2   85.39    3.40
 -14   7   2   91.79    4.40
 -14   7   2   89.69    3.30
 -14   7   2   86.59    3.40
 -13  -7   2   10.10    0.70
 -13  -7   2   10.50    1.00
 -13  -7   2   11.70    1.70
 -13  -7   2    9.80    1.00
 -13  -7   2    9.80    1.10
  13   7  -2   10.90    0.90
 -13   7   2    9.40    1.00
 -13   7   2    9.10    2.50
 -13   7   2   10.90    1.50
 -13   7   2    8.30    0.90
 -12  -7   2  160.48    6.60
 -12  -7   2  146.49    5.10
 -12  -7   2  145.09    4.90
 -12  -7   2  146.39    6.00
 -12   7   2  148.89    5.20
 -12   7   2  147.89    8.50
 -12   7   2  142.09    6.50
 -11  -7   2   26.80    2.00
 -11  -7   2   22.90    2.10
 -11  -7   2   23.60    1.30
 -11   7   2   20.10    4.10
 -11   7   2   24.50    1.40
 -11   7   2   23.60    3.20
  10  -7  -2   73.89    3.50
 -10  -7   2   72.69    3.80
 -10   7   2   83.19    6.70
 -10   7   2   75.29    5.60
 -10   7   2   83.09    5.30
  -9  -7   2   20.50    1.90
   9  -7  -2   18.70    1.50
  -9   7   2   17.90    3.00
  -9   7   2   25.80    3.20
  -9   7   2   19.00    3.50
  -8  -7   2 1041.20   48.70
  -8  -7   2 1237.18   60.49
   8  -7  -2 1163.78   41.30
  -8   7   2 1167.68   43.30
  -8   7   2 1184.18   49.50
  -8   7   2 1156.88   46.50
   7  -7  -2  639.54   23.10
  -7  -7   2  590.84   27.90
  -7   7   2  639.54   24.70
  -7   7   2  639.94   24.40
  -7   7   2  690.63   27.00
  -6  -7   2   96.49    6.60
   6  -7  -2  114.39    4.70
  -6   7   2  122.89    6.80
  -6   7   2  110.89    5.70
   5  -7  -2  108.69    4.40
  -5  -7   2   92.39    6.10
  -5   7   2  103.19    4.70
  -5   7   2  104.39    5.50
  -5   7   2   88.99    5.00
  -5   7   2  100.99    6.00
  -4  -7   2 1835.32   73.89
   4  -7  -2 1819.02   63.79
  -4   7   2 1727.03   70.09
  -4   7   2 1850.81   70.09
  -4   7   2 1778.62   69.29
   3  -7  -2  308.97   13.50
   3  -7  -2  302.07   11.70
  -3  -7   2  300.47   14.20
  -3   7   2  293.87   13.20
  -3   7   2  293.47   12.80
   3   7  -2  323.77   16.60
  -3   7   2  314.27   15.50
  -3   7   2  307.57   15.40
   2  -7  -2   48.40    3.40
  -2  -7   2   43.90    3.80
  -2   7   2   46.10    3.20
   2   7  -2   54.99    4.00
  -2   7   2   49.20    3.10
  -2   7   2   44.80    3.20
  -2   7   2   48.50    3.60
  -2   7   2   54.79    3.60
   1  -7  -2   34.30    2.90
  -1  -7   2   37.50    3.20
   1   7  -2   32.90    2.80
  -1   7   2   30.90    2.90
  -1   7   2   37.10    3.00
   1   7  -2   33.80    2.80
   1   7  -2   31.40    3.00
  -1   7   2   26.50    2.60
   1   7  -2   38.60    3.20
  -1   7   2   35.70    3.00
  -1   7   2   36.50    2.80
   0  -7  -2    3.60    1.40
   0  -7   2    3.00    1.50
   0   7   2    1.10    1.20
   0   7   2    2.80    1.30
   0   7  -2    2.40    1.10
   0   7  -2    1.70    1.10
   0   7  -2    2.20    0.90
   0   7  -2    1.70    1.10
   0   7  -2    1.70    1.10
   0   7  -2    1.50    1.10
   0   7  -2    4.60    1.60
   0   7   2    2.70    1.40
   1  -7   2   -0.50    0.50
   1  -7   2    6.90    1.70
  -1  -7  -2    1.80    1.40
   1   7   2    2.30    1.20
  -1   7  -2   -0.30    1.00
   1   7   2    0.20    1.20
  -1   7  -2   -0.10    1.10
  -1   7  -2    2.20    1.10
  -1   7  -2    0.30    0.80
   1   7   2    0.00    1.30
  -1   7  -2   -1.10    1.20
  -2  -7  -2  714.43   30.30
   2  -7   2  730.63   30.20
   2  -7   2  726.73   25.60
   2  -7   2  703.13   27.00
  -2   7  -2  718.33   26.50
  -2   7  -2  707.03   28.70
  -2   7  -2  692.93   25.30
   3  -7   2   18.40    1.30
   3  -7   2   20.20    2.40
  -3  -7  -2   20.00    2.70
   3  -7   2   19.40    1.40
   3  -7   2   17.60    1.60
  -3   7  -2   21.30    2.30
  -3   7  -2   20.20    2.30
  -3   7  -2   16.90    2.60
  -4  -7  -2  122.49    7.20
   4  -7   2  129.29    6.80
   4  -7   2  121.79    5.00
   4  -7   2  134.59    4.90
   4  -7   2  126.79    5.60
  -4   7  -2  130.79    7.60
  -4   7  -2  129.79    6.30
  -4   7  -2  129.49    6.10
  -4   7  -2  134.09    7.20
  -5  -7  -2   28.30    4.10
   5  -7   2   23.50    1.70
  -5  -7  -2   19.60    2.30
   5  -7   2   25.60    2.00
  -5  -7  -2   22.40    2.90
  -5   7  -2   26.00    2.80
  -5   7  -2   29.80    3.60
  -5   7  -2   23.00    3.20
  -5   7  -2   22.20    2.70
  -6  -7  -2    2.90    1.80
   6  -7   2    4.30    0.80
  -6  -7  -2    3.10    1.40
  -6  -7  -2    4.60    2.30
   6  -7   2    6.00    1.10
  -6   7  -2    2.30    1.60
  -6   7  -2    2.90    1.50
  -6   7  -2    2.70    1.90
  -6   7  -2    2.90    2.00
  -6   7  -2    5.60    1.60
   7  -7   2  345.67   13.40
   7  -7   2  353.56   14.60
  -7  -7  -2  335.17   20.40
  -7  -7  -2  328.97   16.60
  -7   7  -2  349.37   15.60
  -7   7  -2  345.57   16.10
  -7   7  -2  349.17   14.70
  -7   7  -2  349.67   16.20
  -7   7  -2  328.77   13.30
  -7   7  -2  365.76   16.80
  -7   7  -2  365.56   14.20
   8  -7   2  190.08    7.80
  -8  -7  -2  178.48   10.50
   8  -7   2  194.58    8.50
  -8  -7  -2  176.38    7.60
  -8   7  -2  203.48   11.00
  -8   7  -2  179.18    7.60
  -8   7  -2  211.68   10.20
  -8   7  -2  200.68    9.10
  -8   7  -2  185.28   10.40
  -8   7  -2  202.38    9.60
  -9  -7  -2  281.57   15.90
   9  -7   2  313.37   13.50
  -9  -7  -2  328.57   12.20
   9  -7   2  330.87   12.50
  -9  -7  -2  308.27   12.00
  -9   7  -2  336.27   16.00
  -9   7  -2  302.67   13.60
  -9   7  -2  355.46   15.80
  -9   7  -2  338.47   16.50
  -9   7  -2  306.27   14.30
 -10  -7  -2   72.89    3.80
 -10  -7  -2   77.09    2.80
  10  -7   2   74.19    3.90
 -10  -7  -2   73.19    3.40
 -10  -7  -2   79.39    3.00
  10  -7   2   73.29    3.50
 -10   7  -2   86.59    7.10
 -10   7  -2   72.99    5.50
 -10   7  -2   67.79    5.60
 -10   7  -2   77.09    2.90
 -10   7  -2   78.09    5.50
 -10   7  -2   64.49    6.20
 -11  -7  -2   15.20    0.70
  11  -7   2   13.60    1.60
 -11  -7  -2   16.70    1.20
 -11  -7  -2   16.40    1.80
 -11  -7  -2   16.20    1.10
 -11  -7  -2   13.70    2.20
 -11  -7  -2   13.00    1.10
 -11  -7  -2   13.70    1.00
 -11   7  -2    8.30    2.90
 -11   7  -2   16.50    1.20
 -11   7  -2   11.30    2.90
 -11   7  -2   15.70    3.10
 -12  -7  -2   56.09    2.30
 -12  -7  -2   59.29    3.30
 -12  -7  -2   59.49    2.50
 -12  -7  -2   55.49    2.30
 -12   7  -2   57.79    2.40
 -12   7  -2   54.59    2.40
 -12   7  -2   53.79    5.00
 -13  -7  -2   97.89    3.60
 -13  -7  -2   97.19    3.60
 -13  -7  -2   99.89    4.70
 -13   7  -2  104.39    3.70
 -13   7  -2   98.29    3.60
 -13   7  -2   87.69    6.70
 -14  -7  -2   58.49    2.50
 -14  -7  -2   62.19    3.40
 -14  -7  -2   62.79    2.50
 -14   7  -2   65.39    2.70
 -14   7  -2   69.29    2.60
 -14   7  -2   66.59    5.50
 -15  -7  -2  144.89    4.90
 -15  -7  -2  140.29    4.90
 -15  -7  -2  146.79    5.90
 -15   7  -2  135.09    5.00
 -15   7  -2  141.89    8.50
 -15   7  -2  133.99    4.90
 -16  -7  -2    1.00    0.50
 -16  -7  -2    0.20    0.50
 -16   7  -2    1.10    1.80
 -16   7  -2    1.90    0.70
 -17  -7  -2   -0.10    0.40
 -17  -7  -2    0.80    0.50
 -17   7  -2   -0.60    0.60
 -18  -7  -2    6.80    0.70
 -18   7  -2    5.70    0.70
  19   8  -2   -0.40    0.40
 -18  -8   2   10.70    0.90
  18   8  -2   12.30    1.00
 -18   8   2   10.30    0.90
 -17  -8   2   35.80    1.60
 -17   8   2   31.40    3.80
  17   8  -2   32.80    1.70
 -17   8   2   36.50    1.70
  17   8  -2   36.10    1.70
 -16  -8   2    3.00    0.60
 -16   8   2    2.30    0.70
 -16   8   2    2.40    1.80
  16   8  -2    3.70    0.70
 -15  -8   2   19.00    2.10
 -15  -8   2   17.40    1.20
 -15   8   2   20.00    1.40
  15   8  -2   19.60    1.40
 -15   8   2   18.60    3.10
 -14  -8   2   42.10    2.00
 -14  -8   2   43.30    1.50
 -14  -8   2   44.00    3.10
  14   8  -2   43.50    2.00
 -14   8   2   44.60    4.40
 -14   8   2   44.50    2.10
 -13  -8   2  260.17    8.80
 -13  -8   2  266.97    8.40
 -13  -8   2  267.17    9.90
 -13  -8   2  253.07    9.70
 -13  -8   2  256.67   10.50
 -13   8   2  267.37    8.90
 -13   8   2  255.67   13.30
  13   8  -2  260.47    8.90
 -13   8   2  255.27   10.70
 -12  -8   2   10.90    1.40
 -12  -8   2    9.90    1.00
 -12  -8   2    9.70    0.80
 -12  -8   2   13.50    1.90
 -12   8   2    9.70    1.00
 -12   8   2   10.90    2.60
 -12   8   2    8.80    1.40
  12   8  -2    8.90    0.90
 -11  -8   2  321.47   10.90
 -11  -8   2  317.77   10.50
 -11  -8   2  308.17   10.20
 -11  -8   2  305.57   12.30
 -11   8   2  318.97   16.40
 -11   8   2  322.17   12.80
 -11   8   2  318.67   10.60
 -11   8   2  309.77   15.30
 -10  -8   2   50.09    2.20
 -10  -8   2   53.09    2.10
  10  -8  -2   48.20    2.90
 -10   8   2   49.00    4.60
 -10   8   2   51.19    3.10
 -10   8   2   48.00    4.30
 -10   8   2   50.69    5.60
  -9  -8   2   45.10    4.60
   9  -8  -2   44.70    2.60
  -9   8   2   41.40    2.70
  -9   8   2   48.10    4.40
  -9   8   2   49.50    4.00
  -9   8   2   41.10    4.80
   8  -8  -2    4.90    1.00
  -8  -8   2    7.40    2.30
  -8   8   2    6.40    2.00
  -8   8   2    5.70    2.40
  -8   8   2    5.40    1.60
  -8   8   2    3.90    1.10
   7  -8  -2  308.47   11.70
  -7  -8   2  298.27   15.00
  -7  -8   2  279.57   14.80
  -7   8   2  309.97   12.20
  -7   8   2  319.97   14.60
  -6  -8   2   28.30    3.50
   6  -8  -2   28.90    2.10
  -6   8   2   37.30    3.80
  -6   8   2   31.10    2.20
  -5  -8   2   47.20    4.30
  -5   8   2   61.19    4.50
  -4  -8   2   29.70    3.40
  -4   8   2   32.00    3.30
  -3  -8   2  235.88   12.00
   3  -8  -2  238.78   11.40
   3   8  -2  252.37   13.80
  -3   8   2  256.27   10.60
  -3   8   2  236.48   11.30
  -2  -8   2  178.88    9.30
   2  -8  -2  177.98    8.80
  -2   8   2  178.58    8.80
  -2   8   2  156.68    8.50
  -2   8   2  188.98    8.40
   2   8  -2  189.88   10.40
  -2   8   2  169.58    9.00
  -1  -8   2    0.10    1.40
   1  -8  -2    2.40    1.40
  -1   8   2    2.00    1.60
  -1   8   2    1.70    1.20
  -1   8   2    8.00    1.70
  -1   8   2    2.70    1.30
   1   8  -2    1.90    1.40
   1   8  -2    2.10    1.40
  -1   8   2    2.50    1.30
   1   8  -2    2.80    1.20
   1   8  -2    2.70    1.40
   0  -8  -2   53.09    4.00
   0  -8   2   54.49    4.20
   0   8   2   58.49    4.10
   0   8  -2   53.79    3.40
   0   8   2   52.49    3.90
   0   8  -2   49.40    3.40
   0   8   2   57.59    4.40
   0   8  -2   57.49    3.60
   0   8  -2   57.79    4.30
   0   8  -2   61.79    3.40
   1  -8   2  172.78    8.80
  -1  -8  -2  164.88    8.80
   1   8   2  174.38    8.70
   1   8   2  168.98    8.20
  -1   8  -2  173.38    7.60
   1   8   2  194.68   10.30
  -1   8  -2  161.68    7.30
  -1   8  -2  161.88    8.60
   2  -8   2  109.89    6.30
  -2  -8  -2  112.79    6.60
   2  -8   2  115.69    4.90
  -2   8  -2  114.99    6.50
  -2   8  -2  105.49    5.40
  -2   8  -2  113.39    5.50
  -3  -8  -2   32.50    3.30
   3  -8   2   33.80    2.00
   3  -8   2   32.40    3.10
  -3   8  -2   32.80    2.80
  -3   8  -2   31.60    3.50
  -3   8  -2   31.30    2.90
   4  -8   2  176.48    6.90
   4  -8   2  164.18    8.80
  -4  -8  -2  164.98    9.20
  -4   8  -2  179.28    8.50
  -4   8  -2  178.58    7.90
  -4   8  -2  172.38    9.10
  -4   8  -2  180.48    8.10
   5  -8   2  167.08    7.40
   5  -8   2  194.48    6.90
   5  -8   2  163.78    6.80
  -5  -8  -2  175.18   11.70
  -5  -8  -2  157.38    9.40
  -5   8  -2  176.58    8.10
  -5   8  -2  187.88    8.70
  -5   8  -2  185.68    9.50
  -5   8  -2  173.18    7.30
  -5   8  -2  180.08    8.40
   6  -8   2    0.80    0.50
  -6  -8  -2    1.30    1.50
   6  -8   2    2.00    0.80
  -6  -8  -2    0.80    2.00
  -6   8  -2   -0.20    1.40
  -6   8  -2    0.80    0.80
  -6   8  -2    0.90    1.50
  -6   8  -2    2.80    1.40
  -6   8  -2   -0.70    1.30
  -6   8  -2    2.20    1.80
   7  -8   2  142.79    6.10
  -7  -8  -2  120.69    8.30
   7  -8   2  135.79    5.30
   7  -8   2  128.69    5.30
  -7   8  -2  145.09    8.50
  -7   8  -2  139.39    5.90
  -7   8  -2  133.69    7.40
  -7   8  -2  144.29    7.30
  -7   8  -2  136.69    7.30
  -7   8  -2  153.38    8.00
   8  -8   2   45.90    2.70
  -8  -8  -2   49.00    2.80
  -8  -8  -2   42.10    4.80
  -8   8  -2   40.00    4.70
  -8   8  -2   57.89    4.50
  -8   8  -2   46.40    5.30
  -8   8  -2   50.89    4.40
  -8   8  -2   44.50    2.60
  -8   8  -2   54.69    4.30
  -9  -8  -2   53.89    2.90
  -9  -8  -2   54.09    3.10
   9  -8   2   47.90    2.80
  -9  -8  -2   53.19    2.20
  -9  -8  -2   53.79    2.10
  -9  -8  -2   40.50    4.90
  -9   8  -2   44.60    2.60
  -9   8  -2   50.09    4.50
  -9   8  -2   46.20    4.60
  -9   8  -2   54.59    4.60
  -9   8  -2   51.79    5.30
 -10  -8  -2    8.20    0.70
 -10  -8  -2    9.60    1.50
 -10  -8  -2    8.00    1.10
 -10  -8  -2    7.90    0.80
 -10  -8  -2    8.80    0.90
 -10  -8  -2    8.30    0.70
 -10   8  -2    5.10    2.20
 -10   8  -2    6.80    2.90
 -10   8  -2    7.30    0.90
 -10   8  -2    7.20    2.50
 -10   8  -2    8.10    2.80
 -11  -8  -2  108.79    4.50
 -11  -8  -2  111.29    3.90
 -11  -8  -2  111.29    3.70
 -11  -8  -2  113.29    4.20
 -11  -8  -2  108.39    4.60
 -11  -8  -2  109.19    5.20
 -11   8  -2  106.39    7.30
  11   8   2  106.19    4.00
 -11   8  -2  108.89    4.10
 -12  -8  -2   37.30    1.40
 -12  -8  -2   38.30    2.70
 -12  -8  -2   38.60    1.80
 -12  -8  -2   40.50    1.70
 -12   8  -2   37.10    4.20
  12   8   2   35.90    1.80
 -12   8  -2   39.80    2.00
 -13  -8  -2    0.60    0.60
 -13  -8  -2    0.90    0.50
 -13  -8  -2   -0.20    0.90
 -13   8  -2    0.30    0.70
 -13   8  -2    0.70    2.00
  13   8   2    1.10    0.60
 -14  -8  -2    4.20    0.70
 -14  -8  -2    4.20    0.60
 -14  -8  -2    2.40    1.10
 -14   8  -2    3.10    0.80
 -14   8  -2    3.30    2.10
  14   8   2    5.50    0.70
 -15  -8  -2   -0.30    0.80
 -15  -8  -2    0.50    0.50
 -15  -8  -2    0.70    0.50
 -15   8  -2    0.90    0.70
  15   8   2   -0.10    0.50
 -15   8  -2   -2.60    1.40
 -16  -8  -2   31.60    1.50
 -16  -8  -2   33.70    1.50
 -16   8  -2   31.00    1.60
  16   8   2   29.60    1.50
 -16   8  -2   31.20    3.60
 -17  -8  -2   38.20    1.60
 -17  -8  -2   36.90    1.60
  17   8   2   40.60    1.70
 -17   8  -2   35.60    1.70
 -18  -8  -2    0.20    0.40
 -18  -9   2    7.20    0.70
  18   9  -2    6.50    0.60
 -18   9   2    6.20    0.70
 -17  -9   2    1.40    0.60
  17   9  -2    1.20    0.60
 -17   9   2    1.90    0.60
  17   9  -2    1.50    0.60
 -16  -9   2   -0.60    0.50
 -16   9   2    0.10    0.60
  16   9  -2   -0.40    0.50
 -16   9   2    0.20    1.50
 -15  -9   2    0.30    0.60
 -15  -9   2    1.00    1.00
 -15   9   2   -1.40    1.50
 -15   9   2    1.00    0.60
  15   9  -2    0.30    0.60
 -14  -9   2    4.10    0.70
 -14  -9   2    5.30    0.40
 -14  -9   2    8.60    1.60
 -14   9   2    3.60    0.80
  14   9  -2    5.40    0.80
 -14   9   2    4.00    2.10
 -13  -9   2    1.90    0.40
 -13  -9   2    1.50    0.70
 -13  -9   2   -0.30    1.00
 -13  -9   2    1.20    0.60
 -13   9   2    2.30    1.10
  13   9  -2    2.00    0.70
 -13   9   2    2.60    2.10
 -13   9   2    2.50    0.70
 -12  -9   2  167.58    5.50
 -12  -9   2  161.98    6.80
 -12  -9   2  164.08    5.70
 -12   9   2  161.18    7.20
 -12   9   2  163.08    5.80
 -12   9   2  163.18    9.30
  12   9  -2  161.28    5.80
 -11  -9   2   96.39    3.60
 -11  -9   2   97.49    3.70
 -11  -9   2  101.09    3.40
 -11   9   2   96.79    3.70
  11   9  -2   96.19    3.60
 -11   9   2   93.79    4.80
 -11   9   2   97.59    6.50
 -10  -9   2   89.89    3.30
 -10  -9   2   86.39    3.40
 -10  -9   2   89.69    3.20
 -10   9   2   98.99    6.20
 -10   9   2   98.19    7.50
 -10   9   2   86.99    4.50
 -10   9   2   82.89    3.30
  -9  -9   2   52.39    5.20
  -9   9   2   53.59    3.20
  -9   9   2   53.59    5.70
  -9   9   2   56.99    4.50
  -8  -9   2  179.18    8.70
  -8  -9   2  175.68    8.70
  -8  -9   2  160.78   10.10
  -8   9   2  178.88    7.70
  -8   9   2  175.08   10.10
  -8   9   2  179.98    9.40
  -7  -9   2   11.90    2.80
  -7  -9   2   14.20    1.60
  -7   9   2   14.90    3.10
  -7   9   2   14.70    1.80
  -6  -9   2   75.39    6.00
  -6   9   2   81.69    4.30
  -6   9   2   85.79    3.40
  -6   9   2   90.19    3.50
  -6   9   2   91.19    6.20
  -5  -9   2   22.40    3.40
  -5   9   2   28.50    2.30
  -5   9   2   36.40    3.80
  -4  -9   2   -0.50    1.50
  -4   9   2    1.30    1.60
  -4   9   2    0.80    0.90
  -3  -9   2   34.80    3.70
   3  -9  -2   38.30    3.20
  -3   9   2   40.30    2.60
  -3   9   2   28.60    3.50
  -2  -9   2    2.20    1.70
   2  -9  -2    3.00    1.50
  -2   9   2    2.70    1.60
  -2   9   2    0.30    0.80
  -2   9   2    0.60    0.80
   2   9  -2   -0.40    1.40
  -2   9   2    0.20    1.00
  -1  -9   2  595.94   26.40
   1  -9  -2  617.44   26.10
   1   9  -2  564.34   28.50
  -1   9   2  593.54   25.10
   1   9  -2  598.64   24.90
  -1   9   2  616.54   28.30
   1   9  -2  591.14   25.00
  -1   9   2  587.04   28.50
  -1   9   2  649.14   24.90
   1   9  -2  613.94   28.30
   0  -9  -2  586.34   24.70
   0  -9   2  559.94   24.80
   0   9  -2  548.35   23.50
   0   9  -2  546.35   25.80
   0   9   2  578.54   23.90
   0   9   2  575.44   23.30
   0   9  -2  547.45   23.20
   0   9  -2  565.64   25.80
  -1  -9  -2  179.38    9.50
   1  -9   2  183.08    9.40
   1   9   2  179.08    8.80
  -1   9  -2  178.08    7.90
  -1   9  -2  183.98    8.00
  -1   9  -2  173.18    9.20
  -2  -9  -2    3.00    1.70
   2  -9   2    4.30    1.70
  -2   9  -2    2.30    1.80
  -2   9  -2    2.40    1.30
   2   9   2    2.60    1.60
  -2   9  -2    1.40    1.30
   3  -9   2    5.80    1.90
  -3  -9  -2    3.60    1.90
  -3   9  -2    1.70    1.70
  -3   9  -2    4.90    1.20
  -3   9  -2    3.70    1.60
  -3   9  -2    4.70    1.50
  -4  -9  -2   96.19    6.50
   4  -9   2  112.49    6.20
   4  -9   2   97.19    4.50
  -4   9  -2   97.59    5.60
  -4   9  -2   95.19    6.60
  -4   9  -2   96.19    5.60
  -4   9  -2  102.79    4.70
   5  -9   2   63.09    3.10
  -5  -9  -2   62.69    5.20
  -5  -9  -2   60.59    6.40
  -5  -9  -2   57.79    3.70
  -5   9  -2   65.49    4.50
  -5   9  -2   61.99    3.30
  -5   9  -2   58.19    5.10
  -5   9  -2   65.09    4.20
  -5   9  -2   54.69    4.20
   6  -9   2   44.70    2.40
  -6  -9  -2   44.20    2.50
  -6  -9  -2   41.30    4.40
  -6  -9  -2   42.50    2.60
  -6   9  -2   49.20    4.80
  -6   9  -2   38.80    2.60
  -6   9  -2   46.60    4.00
  -6   9  -2   40.50    3.50
  -6   9  -2   43.80    4.00
  -6   9  -2   42.10    3.90
  -7  -9  -2   28.50    4.40
   7  -9   2   38.20    2.20
  -7   9  -2   35.00    2.40
  -7   9  -2   33.90    3.60
  -7   9  -2   38.00    3.60
  -7   9  -2   38.60    4.90
  -7   9  -2   35.80    3.30
  -7   9  -2   39.60    3.90
  -8  -9  -2    0.80    2.00
   8  -9   2   -0.30    0.70
  -8  -9  -2    0.00    0.50
  -8   9  -2   -0.20    1.80
  -8   9  -2    0.60    0.80
  -8   9  -2    1.40    2.20
  -8   9  -2   -0.40    1.70
  -8   9  -2   -2.70    1.40
  -9  -9  -2   13.50    1.00
  -9  -9  -2   11.40    1.10
  -9  -9  -2   13.70    1.80
  -9  -9  -2   12.00    1.00
  -9  -9  -2   12.80    3.40
  -9  -9  -2   13.00    0.90
  -9   9  -2   12.40    1.50
  -9   9  -2    9.00    3.20
  -9   9  -2   14.90    3.20
  -9   9  -2   12.30    2.80
  -9   9  -2   12.60    3.00
  -9   9  -2   12.70    1.10
 -10  -9  -2   17.00    1.10
 -10  -9  -2   11.60    1.20
 -10  -9  -2   13.90    1.10
 -10  -9  -2   14.30    1.10
 -10  -9  -2   13.00    0.90
 -10  -9  -2   11.30    1.60
 -10  -9  -2   14.70    1.60
  10   9   2   13.60    1.20
 -10   9  -2   10.40    2.90
 -10   9  -2   15.30    3.00
 -10   9  -2   14.40    1.20
 -11  -9  -2   54.89    2.30
 -11  -9  -2   51.49    3.20
 -11  -9  -2   49.00    1.90
 -11  -9  -2   47.50    2.60
 -11  -9  -2   51.59    2.10
  11   9   2   48.10    2.20
 -11   9  -2   50.49    2.30
 -11   9  -2   46.10    4.70
 -12  -9  -2   20.00    0.90
 -12  -9  -2   20.40    2.20
 -12  -9  -2   22.70    1.30
 -12  -9  -2   21.30    1.40
 -12  -9  -2   19.70    1.30
 -12   9  -2   22.40    3.60
 -12   9  -2   19.30    1.40
  12   9   2   19.90    1.30
 -13  -9  -2   48.40    2.10
 -13  -9  -2   52.39    3.20
 -13  -9  -2   50.99    2.10
 -13   9  -2   50.29    2.30
 -13   9  -2   49.80    4.80
  13   9   2   51.79    2.20
 -14  -9  -2    0.50    0.50
 -14  -9  -2    0.50    0.90
 -14  -9  -2    0.60    0.50
  14   9   2    0.80    0.60
 -14   9  -2   -0.50    0.60
 -14   9  -2    2.50    2.00
 -15  -9  -2   28.00    1.40
 -15  -9  -2   23.80    1.30
 -15  -9  -2   26.30    2.10
 -15   9  -2   27.60    1.50
  15   9   2   25.80    1.40
 -15   9  -2   21.30    3.30
 -16  -9  -2   49.70    2.00
 -16  -9  -2   47.40    2.00
 -16   9  -2   50.99    2.10
  16   9   2   48.20    2.00
 -17  -9  -2   29.40    1.30
 -17  -9  -2   30.10    1.30
  17   9   2   30.60    1.40
  18  10  -2   17.10    1.00
 -17 -10   2    0.20    0.50
 -17  10   2    1.10    0.50
  17  10  -2    1.30    0.50
 -16 -10   2   15.00    1.10
 -16  10   2   14.90    1.20
  16  10  -2   18.80    1.20
  16  10  -2   15.90    1.20
 -15 -10   2   30.40    2.50
 -15 -10   2   27.90    1.50
  15  10  -2   28.70    1.60
 -15  10   2   27.80    1.50
 -15  10   2   30.40    3.50
 -14 -10   2    2.10    1.20
 -14 -10   2    1.10    0.60
 -14 -10   2    1.40    0.30
 -14  10   2    3.20    2.00
  14  10  -2    1.00    0.70
 -14  10   2    2.40    0.70
 -13 -10   2    4.60    1.40
 -13 -10   2    2.90    0.70
 -13 -10   2    4.40    0.90
 -13 -10   2    3.00    0.50
 -13  10   2    3.80    1.20
  13  10  -2    3.60    0.70
 -13  10   2    2.90    0.70
 -13  10   2    2.40    2.10
 -12 -10   2   37.40    1.80
 -12 -10   2   35.40    2.50
 -12 -10   2   34.70    1.60
  12  10  -2   36.80    1.90
 -12  10   2   38.60    1.90
 -12  10   2   34.20    2.70
 -12  10   2   38.30    4.20
 -11 -10   2    6.20    0.80
 -11 -10   2    9.30    0.90
 -11 -10   2    7.80    0.80
  11  10  -2    7.60    0.90
 -11  10   2    7.20    2.40
 -11  10   2    7.10    1.50
 -11  10   2    6.60    0.90
 -10 -10   2   67.89    2.70
 -10 -10   2   62.49    2.60
 -10 -10   2   69.49    2.70
 -10  10   2   59.29    3.80
 -10  10   2   70.09    5.30
  10  10  -2   65.69    2.70
  -9 -10   2   25.60    1.40
  -9 -10   2   26.90    1.50
  -9 -10   2   18.80    3.80
  -9  10   2   20.70    4.20
  -9  10   2   25.50    3.30
  -9  10   2   27.80    2.40
  -8 -10   2   18.00    1.60
  -8 -10   2   20.30    1.50
  -8 -10   2   19.00    3.70
  -8  10   2   18.20    2.90
  -8  10   2   18.30    2.10
  -8  10   2   22.60    3.90
  -7 -10   2   99.39    5.60
  -7 -10   2   82.69    6.80
  -7  10   2   99.49    5.00
  -7  10   2  101.59    7.10
  -6 -10   2  157.98   10.20
  -6  10   2  190.08    8.00
  -6  10   2  179.58    6.60
  -6  10   2  178.08    6.60
  -6  10   2  175.18   10.00
  -5 -10   2  217.68   12.10
  -5  10   2  226.48    8.50
  -5  10   2  226.68   11.60
  -5  10   2  226.58    9.60
  -4 -10   2  369.96   17.60
  -4  10   2  360.96   14.60
  -4  10   2  360.06   13.40
  -4  10   2  356.46   16.50
  -3 -10   2  295.27   14.30
  -3  10   2  279.37   11.70
   3  10  -2  276.67   12.90
  -3  10   2  286.67   13.30
  -3  10   2  276.57   11.90
   3  10  -2  277.97   13.60
   2 -10  -2   14.00    2.60
  -2 -10   2   13.70    2.80
   2  10  -2   14.30    2.10
   2  10  -2   13.80    1.60
   2  10  -2   13.80    2.80
   2  10  -2   10.60    2.30
  -2  10   2   12.10    2.60
  -2  10   2   14.60    2.00
  -2  10   2   17.50    2.00
  -1 -10   2   57.09    4.70
   1 -10  -2   68.19    4.70
  -1  10   2   50.19    3.80
   1  10  -2   48.10    3.80
  -1  10   2   58.99    4.50
   1  10  -2   57.09    4.70
   1  10  -2   57.39    4.00
   1  10  -2   48.90    3.60
  -1  10   2   50.89    3.40
  -1  10   2   51.99    3.60
   1  10  -2   51.39    3.60
  -1  10   2   50.19    3.90
   0 -10  -2   77.49    5.30
   0 -10   2   72.29    5.30
   0  10  -2   67.19    4.30
   0  10  -2   66.59    5.20
   0  10  -2   71.49    4.30
   0  10   2   70.59    5.00
   0  10   2   67.39    4.80
  -1 -10  -2  158.78    8.40
   1 -10   2  140.39    8.10
   1  10   2  144.79    7.70
  -1  10  -2  138.49    6.40
  -1  10  -2  137.09    7.20
  -1  10  -2  138.79    8.10
  -1  10  -2  140.39    6.50
  -2 -10  -2    9.60    2.40
   2 -10   2   10.30    2.40
  -2  10  -2   11.10    1.30
  -2  10  -2   12.90    1.70
  -2  10  -2   13.30    2.90
  -2  10  -2   11.50    2.10
  -3 -10  -2   58.39    4.90
   3 -10   2   55.59    4.50
  -3  10  -2   53.29    4.90
  -3  10  -2   59.69    2.70
  -3  10  -2   57.89    4.10
  -3  10  -2   59.29    3.40
  -3  10  -2   48.90    3.80
  -3  10  -2   53.69    2.70
  -4 -10  -2    6.10    2.30
  -4  10  -2    7.40    1.90
  -4  10  -2    4.80    1.30
  -4  10  -2    3.50    2.30
  -4  10  -2    4.10    1.80
  -5 -10  -2  112.99    7.70
  -5 -10  -2  112.69    6.30
  -5  10  -2  113.59    6.50
  -5  10  -2  117.59    5.40
  -5  10  -2  106.29    6.30
  -5  10  -2  116.69    7.70
  -6 -10  -2   13.10    3.10
   6 -10   2    9.30    1.40
  -6 -10  -2    9.60    1.30
  -6 -10  -2    9.80    1.10
  -6  10  -2    8.60    2.40
  -6  10  -2   13.60    2.80
  -6  10  -2    9.70    3.10
  -6  10  -2   12.50    1.60
  -6  10  -2   12.20    2.20
  -7 -10  -2   31.80    1.50
   7 -10   2   32.10    2.30
  -7 -10  -2   30.60    1.60
  -7 -10  -2   23.90    4.20
  -7  10  -2   28.70    2.30
  -7  10  -2   33.60    4.90
  -7  10  -2   28.90    3.20
  -7  10  -2   28.70    3.60
  -7  10  -2   24.60    3.60
  -8 -10  -2   30.30    1.50
  -8 -10  -2   25.20    4.40
  -8 -10  -2   29.20    1.40
  -8 -10  -2   31.70    1.60
  -8 -10  -2   28.30    1.50
  -8  10  -2   29.80    4.60
  -8  10  -2   34.30    4.00
  -8  10  -2   26.70    2.20
  -8  10  -2   30.40    1.60
  -8  10  -2   26.10    3.80
  -9 -10  -2  277.07   16.80
  -9 -10  -2  347.27   11.50
  -9 -10  -2  320.47   11.60
  -9 -10  -2  329.77   11.20
  -9 -10  -2  324.67   10.80
  -9 -10  -2  333.97   10.60
   9  10   2  329.57   11.00
  -9  10  -2  312.27   13.00
  -9  10  -2  330.27   10.90
  -9  10  -2  322.47   16.30
 -10 -10  -2   41.50    1.70
 -10 -10  -2   43.40    2.00
 -10 -10  -2   42.10    3.00
 -10 -10  -2   44.10    2.70
 -10 -10  -2   40.60    2.10
 -10 -10  -2   44.30    1.90
 -10 -10  -2   43.50    1.90
 -10  10  -2   42.80    4.50
 -10  10  -2   38.00    2.50
 -10  10  -2   46.20    2.10
  10  10   2   40.70    1.90
 -11 -10  -2  206.18    6.70
 -11 -10  -2  209.28    7.50
 -11 -10  -2  206.78    7.00
 -11 -10  -2  201.98    8.00
 -11 -10  -2  196.88    7.20
 -11 -10  -2  199.78    8.60
  11  10   2  211.08    7.10
 -11  10  -2  203.68   11.40
 -11  10  -2  212.18    7.10
 -12 -10  -2   92.49    3.10
 -12 -10  -2   88.59    4.70
 -12 -10  -2   94.09    3.70
 -12 -10  -2   92.19    3.40
 -12 -10  -2   92.39    3.40
  12  10   2   90.39    3.50
 -12  10  -2   92.19    6.60
 -12  10  -2   94.09    3.60
 -13 -10  -2  136.49    4.90
 -13 -10  -2  137.49    4.90
 -13 -10  -2  144.89    6.30
 -13  10  -2  161.38    8.90
  13  10   2  144.49    5.00
 -13  10  -2  137.59    5.10
 -14 -10  -2    1.90    1.00
 -14 -10  -2    3.30    0.60
 -14 -10  -2    4.80    0.60
  14  10   2    2.00    0.60
 -14  10  -2    3.30    0.70
 -14  10  -2    4.70    2.20
 -15 -10  -2   -0.50    0.40
 -15 -10  -2    0.70    0.50
  15  10   2   -0.40    0.50
 -15  10  -2    1.10    1.70
 -16 -10  -2    4.00    0.50
 -16 -10  -2    5.40    0.60
  16  10   2    4.00    0.60
 -17 -10  -2   29.20    1.20
  17  10   2   30.90    1.30
 -17 -11   2    0.60    0.40
  17  11  -2    0.00    0.40
 -16 -11   2    2.00    0.60
  16  11  -2    1.60    0.60
  16  11  -2    2.30    0.60
 -15 -11   2    0.10    0.60
 -15  11   2    0.00    0.60
 -15  11   2   -0.30    1.50
  15  11  -2    0.90    0.60
  15  11  -2    0.10    0.50
 -14 -11   2   13.90    1.20
 -14 -11   2   14.10    1.90
 -14 -11   2   12.70    0.70
 -14  11   2   12.20    1.10
 -14  11   2   12.10    2.60
  14  11  -2   14.50    1.30
 -13 -11   2   43.20    1.70
 -13 -11   2   43.30    2.00
 -13 -11   2   42.90    2.40
  13  11  -2   44.30    2.00
 -13  11   2   46.90    4.50
 -13  11   2   40.90    2.00
 -13  11   2   38.60    2.80
 -12 -11   2    1.50    0.60
 -12 -11   2    1.30    0.90
 -12 -11   2    1.70    0.50
 -12  11   2    4.80    1.40
 -12  11   2    1.90    1.90
  12  11  -2    1.70    0.70
 -11 -11   2   18.90    1.20
 -11 -11   2   21.70    1.40
 -11 -11   2   20.80    1.40
 -11  11   2   20.30    2.30
  11  11  -2   20.60    1.40
 -11  11   2   19.00    3.20
 -10 -11   2    2.40    0.70
 -10 -11   2    2.50    0.70
 -10  11   2    4.00    2.20
 -10  11   2    2.40    1.20
  10  11  -2    2.40    0.70
  -9 -11   2    6.20    0.80
  -9 -11   2    7.60    0.80
  -9  11   2    3.30    1.30
  -9  11   2    5.00    0.70
  -9  11   2    2.20    2.00
   9  11  -2    6.90    0.80
  -8 -11   2    5.80    0.80
  -8 -11   2    4.40    2.50
  -8 -11   2    5.00    0.70
  -8  11   2    7.70    0.80
  -8  11   2    4.00    2.10
  -8  11   2    6.30    3.00
  -8  11   2    7.90    1.60
  -7 -11   2    2.10    1.00
  -7 -11   2    0.10    2.10
  -7 -11   2    1.80    0.70
  -7 -11   2    1.90    0.40
  -7  11   2    3.00    1.30
  -7  11   2    1.60    0.60
  -7  11   2    4.10    2.40
  -6 -11   2   23.40    4.10
  -6  11   2   31.70    2.70
  -6  11   2   35.90    4.70
  -5 -11   2   84.59    6.50
  -5  11   2   77.19    6.10
  -5  11   2   77.79    3.40
  -5  11   2   76.29    4.40
  -4 -11   2   17.00    3.50
   4  11  -2   23.00    2.80
  -4  11   2   23.90    3.80
   4  11  -2   21.80    2.60
  -4  11   2   23.90    2.40
  -4  11   2   26.00    1.80
  -3 -11   2   86.69    6.40
   3  11  -2   83.19    4.90
   3  11  -2   87.19    5.20
  -3  11   2   84.99    4.70
  -3  11   2   83.59    4.10
  -3  11   2   81.99    6.10
   3  11  -2   82.39    5.80
   3  11  -2   78.59    6.10
   2 -11  -2    9.60    2.40
  -2 -11   2    8.20    2.50
   2  11  -2    6.30    1.80
   2  11  -2    9.20    2.00
   2  11  -2    8.40    2.60
  -2  11   2   10.60    1.80
   2  11  -2   12.80    2.50
  -2  11   2    5.10    1.40
   2  11  -2    9.30    2.00
  -2  11   2    8.80    2.50
  -1 -11   2    3.80    2.10
   1 -11  -2    3.70    1.90
  -1  11   2    7.60    1.70
   1  11  -2    3.70    2.20
  -1  11   2    5.90    1.40
  -1  11   2    4.60    1.20
  -1  11   2    5.00    1.60
   1  11  -2    4.70    1.10
  -1  11   2    5.60    2.20
   1  11  -2    6.10    1.80
   1  11  -2    4.10    1.10
   1  11  -2    5.40    1.70
   0 -11   2  122.99    7.60
   0 -11  -2  117.39    7.40
   0  11   2  105.59    7.20
   0  11  -2  107.29    6.00
   0  11  -2  116.69    6.50
   0  11   2  118.59    7.10
   0  11   2  122.19    6.10
   0  11   2  127.89    6.10
   0  11  -2  123.99    7.70
   0  11   2  119.29    7.00
   1 -11   2   -1.00    1.50
  -1 -11  -2    0.20    1.50
   1  11   2   -0.10    1.10
  -1  11  -2   -1.40    1.20
  -1  11  -2    0.10    1.80
  -2 -11  -2  172.18    9.60
   2 -11   2  157.98    9.10
  -2  11  -2  159.38    7.30
  -2  11  -2  156.48    6.50
  -2  11  -2  164.18    8.30
  -2  11  -2  154.58    9.30
   2  11   2  162.28    9.00
   3 -11   2   83.39    5.80
  -3 -11  -2   79.99    6.20
  -3  11  -2   78.19    4.40
  -3  11  -2   86.09    5.20
  -3  11  -2   81.39    3.50
  -3  11  -2   83.59    6.40
  -3  11  -2   80.29    3.60
  -4 -11  -2   20.20    3.50
  -4  11  -2   17.70    3.50
  -4  11  -2   19.30    2.80
  -4  11  -2   18.20    2.20
  -5 -11  -2   28.00    2.40
  -5 -11  -2   26.10    4.10
  -5  11  -2   25.00    3.00
  -5  11  -2   23.40    2.30
  -5  11  -2   18.70    3.70
  -6 -11  -2   25.30    1.60
  -6 -11  -2   22.10    4.10
  -6 -11  -2   24.40    1.90
  -6 -11  -2   27.40    1.40
  -6 -11  -2   23.40    1.30
  -6 -11  -2   26.80    1.80
  -6  11  -2   26.60    2.40
  -6  11  -2   30.60    3.20
  -6  11  -2   23.10    3.50
  -6  11  -2   23.30    4.30
  -7 -11  -2    1.50    0.70
  -7 -11  -2    1.50    0.50
  -7 -11  -2    0.60    0.50
  -7 -11  -2    1.10    2.20
  -7 -11  -2   -0.40    0.50
  -7  11  -2   -0.50    1.80
  -7  11  -2    0.20    1.50
  -7  11  -2    1.40    2.70
  -7  11  -2    0.50    1.00
  -8 -11  -2    0.50    0.60
  -8 -11  -2    0.20    0.50
  -8 -11  -2    0.40    0.50
  -8 -11  -2    1.00    0.70
  -8  11  -2    0.80    1.00
   8  11   2    0.40    0.60
  -8  11  -2   -0.10    2.10
  -9 -11  -2    5.00    0.70
  -9 -11  -2    4.20    0.80
  -9 -11  -2    5.80    0.80
  -9 -11  -2    3.50    0.70
  -9 -11  -2    4.80    0.60
   9  11   2    4.30    0.70
  -9  11  -2    5.80    0.80
  -9  11  -2    7.10    2.60
  -9  11  -2    3.40    1.20
 -10 -11  -2   30.20    1.60
 -10 -11  -2   29.00    1.70
 -10 -11  -2   27.60    2.20
 -10 -11  -2   27.60    1.50
 -10 -11  -2   29.10    1.40
 -10 -11  -2   30.30    1.50
  10  11   2   27.00    1.60
 -10  11  -2   27.10    4.00
 -10  11  -2   28.60    1.60
 -11 -11  -2   25.90    1.90
 -11 -11  -2   24.90    1.40
 -11 -11  -2   25.90    1.40
 -11 -11  -2   28.40    2.60
 -11 -11  -2   26.40    1.50
 -11 -11  -2   26.70    1.20
 -11  11  -2   26.00    1.60
  11  11   2   24.70    1.50
 -11  11  -2   20.40    3.60
 -12 -11  -2    6.30    0.60
 -12 -11  -2    4.80    0.70
 -12 -11  -2    5.20    0.70
 -12 -11  -2    6.40    1.50
 -12 -11  -2    6.50    0.70
  12  11   2    5.90    0.80
 -12  11  -2    5.60    2.50
 -13 -11  -2    3.20    0.60
 -13 -11  -2    6.60    1.40
 -13 -11  -2    4.00    0.60
 -13  11  -2    5.40    2.30
  13  11   2    4.40    0.70
 -14 -11  -2    1.00    0.50
 -14 -11  -2    1.30    0.50
 -14  11  -2   -1.20    1.60
  14  11   2    1.70    0.60
 -15 -11  -2    1.00    0.50
 -15 -11  -2    0.20    0.50
  15  11   2    1.70    0.60
 -16 -11  -2    1.80    0.40
 -16 -11  -2    2.10    0.50
  16  11   2    2.00    0.50
  17  12  -2    0.70    0.40
 -16 -12   2   14.20    1.00
  16  12  -2   14.50    1.00
 -15 -12   2   15.90    1.10
  15  12  -2   15.90    1.10
  15  12  -2   15.40    1.10
 -14 -12   2   23.50    0.90
 -14 -12   2   24.50    1.40
  14  12  -2   23.30    1.40
  14  12  -2   22.10    1.30
 -14  12   2   20.20    3.10
 -13 -12   2   -0.10    0.60
 -13 -12   2    0.20    0.60
 -13 -12   2    0.40    0.40
  13  12  -2    0.90    0.60
 -13  12   2    0.80    1.80
 -13  12   2   -0.80    0.90
 -12 -12   2    4.30    0.60
 -12 -12   2    3.90    1.10
 -12 -12   2    4.60    0.70
 -12  12   2    4.80    1.30
 -12  12   2    5.80    2.20
  12  12  -2    4.60    0.80
 -11 -12   2   14.10    1.20
 -11 -12   2   13.60    1.00
 -11 -12   2   13.90    1.20
 -11  12   2   15.00    3.00
  11  12  -2   13.30    1.30
 -11  12   2   11.70    1.90
 -10 -12   2    1.90    0.70
 -10 -12   2    2.40    0.70
  10  12  -2    1.90    0.70
 -10  12   2    2.60    1.30
 -10  12   2    4.80    2.40
  -9 -12   2   48.10    2.20
  -9 -12   2   45.10    2.10
  -9  12   2   47.20    4.50
  -9  12   2   49.60    3.50
   9  12  -2   44.90    2.10
  -8 -12   2   85.49    3.40
  -8  12   2   83.19    6.00
  -8  12   2   77.99    4.70
   8  12  -2   84.19    3.20
  -7 -12   2    8.80    0.90
  -7 -12   2    6.70    3.00
  -7 -12   2    7.90    1.40
  -7  12   2    9.60    1.80
  -6 -12   2   87.99    3.50
  -6 -12   2   94.59    3.70
  -6 -12   2   82.09    7.10
  -6  12   2   85.99    3.00
   6  12  -2   88.29    3.60
  -6  12   2   87.99    7.20
  -6  12   2   96.29    5.10
  -5 -12   2    2.10    2.40
  -5  12   2    2.80    0.80
   5  12  -2    2.80    0.50
  -5  12   2    3.00    0.80
  -5  12   2    2.20    2.50
  -5  12   2    2.50    0.40
   5  12  -2    3.80    1.40
  -5  12   2    3.30    1.50
   5  12  -2    1.70    1.80
  -4 -12   2  113.29    8.30
   4  12  -2  118.39    6.90
  -4  12   2  127.69    6.30
   4  12  -2  126.69    6.80
  -4  12   2  125.89    5.30
  -4  12   2  130.49    8.40
   4  12  -2  117.39    8.10
  -3 -12   2    1.20    2.20
  -3  12   2    5.40    2.50
   3  12  -2    1.50    0.70
   3  12  -2    2.90    1.70
   3  12  -2   -0.40    2.10
  -3  12   2   -0.70    1.20
   3  12  -2    2.90    1.90
  -2 -12   2  302.27   15.10
  -2  12   2  305.17   12.40
   2  12  -2  258.97   14.10
   2  12  -2  267.07   14.30
  -2  12   2  305.27   13.00
   2  12  -2  306.27   13.70
   2  12  -2  279.07   13.60
   2  12  -2  299.37   14.50
  -1 -12   2    4.90    2.40
   1 -12  -2    4.00    2.10
  -1  12   2    5.70    1.70
   1  12  -2    6.40    1.80
  -1  12   2    4.60    1.60
   1  12  -2    2.70    1.60
   1  12  -2    8.40    2.70
   0 -12   2   38.30    4.30
   0 -12  -2   32.20    3.90
   0  12   2   30.40    3.40
   0  12  -2   25.80    4.00
   0  12   2   27.90    3.00
   0  12   2   28.90    2.80
   0  12  -2   30.20    3.20
   0  12  -2   28.50    2.50
  -1 -12  -2   76.69    6.10
   1 -12   2   67.59    5.70
  -1  12  -2   75.49    3.70
  -1  12  -2   70.59    4.90
   1  12   2   72.89    4.10
  -1  12  -2   71.49    6.10
   1  12   2   68.19    5.30
   1  12   2   71.19    4.10
   2 -12   2  816.22   35.50
  -2 -12  -2  802.72   35.90
  -2  12  -2  823.02   34.50
  -2  12  -2  782.22   34.70
   2  12   2  820.02   39.40
  -2  12  -2  828.02   29.20
  -3 -12  -2   76.29    6.40
   3  12   2   68.19    5.10
  -3  12  -2   82.09    4.50
  -3  12  -2   78.69    3.40
  -3  12  -2   75.99    3.30
  -3  12  -2   77.69    5.20
  -3  12  -2   85.09    6.80
  -4 -12  -2  177.28   10.80
  -4 -12  -2  167.48    6.80
  -4  12  -2  178.08    5.60
  -4  12  -2  174.58    9.20
  -4  12  -2  179.88    8.00
  -5 -12  -2  100.29    3.90
  -5 -12  -2  105.09    4.20
  -5 -12  -2  102.59    5.90
  -5 -12  -2  105.79    4.00
  -5 -12  -2   98.49    7.70
  -5 -12  -2   99.19    4.00
  -5  12  -2   96.29    5.20
  -5  12  -2  104.89    6.40
  -5  12  -2   99.19    7.90
  -6 -12  -2   12.20    1.10
  -6 -12  -2   12.00    1.20
  -6 -12  -2   10.90    3.10
  -6 -12  -2   11.70    1.30
  -6 -12  -2   13.30    1.00
  -6  12  -2   15.70    2.60
   6  12   2   12.00    1.20
  -6  12  -2   14.70    3.10
  -6  12  -2    9.60    1.70
  -7 -12  -2   25.80    1.50
  -7 -12  -2   23.10    1.40
  -7 -12  -2   26.20    1.50
  -7 -12  -2   25.50    1.60
  -7  12  -2   29.10    3.50
  -7  12  -2   30.50    4.20
   7  12   2   23.70    1.50
  -7  12  -2   25.50    2.40
  -8 -12  -2   52.59    2.30
  -8 -12  -2   51.39    2.40
  -8 -12  -2   50.39    2.20
  -8 -12  -2   54.49    2.30
  -8  12  -2   51.69    5.00
   8  12   2   54.39    2.30
  -9 -12  -2   23.50    1.60
  -9 -12  -2   23.70    1.40
  -9 -12  -2   23.00    1.30
  -9 -12  -2   25.50    1.50
  -9 -12  -2   25.60    1.40
  -9  12  -2   21.30    3.70
   9  12   2   25.50    1.50
 -10 -12  -2   69.99    2.80
 -10 -12  -2   70.49    2.70
 -10 -12  -2   69.69    2.60
 -10 -12  -2   70.59    3.00
 -10 -12  -2   65.69    2.80
  10  12   2   66.19    2.80
 -10  12  -2   70.79    5.90
 -11 -12  -2    3.40    0.70
 -11 -12  -2    3.00    0.50
 -11 -12  -2    2.50    0.60
 -11 -12  -2    2.90    0.60
 -11 -12  -2    2.90    0.90
 -11  12  -2    3.90    2.40
  11  12   2    1.80    0.70
 -12 -12  -2  109.49    3.80
 -12 -12  -2  107.79    3.90
 -12 -12  -2  110.39    5.30
 -12 -12  -2  101.79    3.60
 -12  12  -2  117.39    7.40
  12  12   2  110.49    4.00
 -13 -12  -2    0.10    0.50
 -13 -12  -2   -0.50    0.40
 -13  12  -2   -0.40    1.80
  13  12   2    0.10    0.60
 -14 -12  -2   58.19    2.30
 -14 -12  -2   61.99    2.40
  14  12   2   63.29    2.40
 -15 -12  -2   17.00    1.00
  15  12   2   16.00    1.10
  16  12   2    2.60    0.50
  16  12   2    2.60    0.50
  16  13  -2    2.50    0.40
 -15 -13   2   66.29    2.50
  15  13  -2   65.49    2.50
  15  13  -2   67.39    2.70
 -14 -13   2    0.60    0.60
  14  13  -2   -0.10    0.50
  14  13  -2   -0.60    0.50
  14  13  -2   -0.40    0.50
 -13 -13   2   24.00    1.60
 -13 -13   2   27.00    1.20
 -13 -13   2   26.90    1.50
 -13  13   2   17.10    3.00
  13  13  -2   24.30    1.40
  13  13  -2   26.70    1.40
 -12 -13   2    9.50    1.40
 -12 -13   2    8.80    0.90
 -12 -13   2   10.80    0.90
  12  13  -2   10.50    1.10
 -12  13   2   10.00    2.50
 -12  13   2   13.10    1.70
 -11 -13   2    3.80    0.60
 -11 -13   2    5.40    0.80
 -11 -13   2    4.30    0.70
 -11  13   2    3.50    1.40
  11  13  -2    2.80    0.70
 -11  13   2    2.60    2.10
 -10 -13   2    3.10    0.70
 -10 -13   2    4.00    0.70
 -10  13   2    2.30    2.20
 -10  13   2    5.90    1.70
  10  13  -2    3.10    0.70
  -9 -13   2   24.70    1.60
  -9  13   2   27.50    2.80
  -9  13   2   30.50    4.00
   9  13  -2   22.80    1.50
   9  13  -2   25.00    1.50
  -8 -13   2   21.80    1.50
  -8  13   2   21.90    3.40
   8  13  -2   24.10    3.40
   8  13  -2   22.70    1.40
   8  13  -2   22.10    1.40
  -7 -13   2   16.50    1.40
  -7 -13   2   17.50    1.90
   7  13  -2   16.50    2.90
   7  13  -2   21.40    2.70
  -7  13   2   13.60    2.20
   7  13  -2   18.00    1.20
  -6 -13   2    9.80    1.00
  -6 -13   2   12.10    1.30
  -6  13   2   12.70    2.10
   6  13  -2   10.50    1.80
  -6  13   2   11.00    0.60
   6  13  -2   10.80    0.80
   6  13  -2   12.80    2.60
   5 -13  -2    9.20    0.90
  -5 -13   2    9.90    1.00
  -5 -13   2    9.60    0.80
  -5  13   2   10.70    2.10
  -5  13   2    8.90    0.70
  -5  13   2    9.40    1.10
   5  13  -2   13.50    2.60
   5  13  -2    8.20    1.50
  -5  13   2   10.50    1.10
  -4 -13   2   40.60    5.20
  -4  13   2   42.40    3.50
  -4  13   2   41.10    2.40
   4  13  -2   37.20    3.70
  -4  13   2   39.90    1.60
  -3 -13   2   26.30    4.40
  -3  13   2   28.90    2.20
  -3  13   2   31.70    1.40
   3  13  -2   33.10    3.50
  -3  13   2   21.30    2.80
   3  13  -2   29.70    4.60
  -2 -13   2    1.70    2.30
   2  13  -2   -2.60    1.40
  -2  13   2    2.80    1.50
   2  13  -2    4.20    2.70
  -2  13   2    1.30    0.50
   1 -13  -2  109.29    7.50
  -1 -13   2  105.39    7.70
  -1  13   2  106.89    5.90
   1  13  -2  105.69    3.70
   1  13  -2  104.79    7.80
  -1  13   2  106.59    3.70
   1  13  -2  104.09    6.40
   0 -13   2   46.70    5.00
   0 -13  -2   46.60    4.90
   0  13  -2   48.30    1.90
   0  13  -2   55.39    5.70
   0  13  -2   44.10    4.00
  -1 -13  -2  331.27   16.30
   1 -13   2  309.87   16.00
  -1  13  -2  315.67   14.80
  -1  13  -2  301.87   10.10
  -1  13  -2  311.87   15.90
  -1  13  -2  324.57   12.10
   2 -13   2    2.20    2.20
  -2 -13  -2    3.20    2.40
  -2  13  -2    0.80    2.40
   2  13   2    3.30    1.00
  -2  13  -2    2.20    1.00
   2  13   2    2.80    1.00
  -2  13  -2    4.90    2.00
  -2  13  -2    3.80    0.50
  -3 -13  -2  230.48   13.20
  -3 -13  -2  237.98    8.20
  -3  13  -2  226.68   11.60
   3  13   2  235.68   12.10
  -3  13  -2  232.28    8.50
  -3  13  -2  231.98    8.50
  -3  13  -2  228.38    7.50
  -4 -13  -2    3.00    0.70
  -4 -13  -2    2.10    0.80
  -4 -13  -2    2.70    0.60
  -4  13  -2    1.70    1.80
   4  13   2    3.20    0.50
   4  13   2    0.50    1.50
  -5 -13  -2   11.00    1.10
  -5 -13  -2   14.40    1.80
  -5 -13  -2   14.00    1.40
   5  13   2    8.40    1.00
  -5  13  -2    7.80    2.20
   5  13   2   10.20    1.10
  -6 -13  -2   73.09    2.90
  -6 -13  -2   68.29    3.00
  -6  13  -2   64.39    5.60
  -6  13  -2   67.99    5.20
   6  13   2   68.19    2.70
  -7 -13  -2    8.20    1.00
  -7 -13  -2    6.60    0.80
  -7 -13  -2    7.70    0.80
  -7  13  -2    9.50    2.80
   7  13   2    7.00    0.80
  -8 -13  -2    0.40    0.50
  -8 -13  -2    0.40    0.60
  -8 -13  -2    0.60    0.70
  -8 -13  -2   -0.10    0.50
   8  13   2    0.00    0.60
  -8  13  -2   -1.70    2.00
  -9 -13  -2    0.30    0.60
  -9 -13  -2    0.70    0.50
  -9 -13  -2   -0.50    0.50
  -9 -13  -2    0.00    0.60
  -9 -13  -2    0.00    0.50
   9  13   2    0.10    0.60
  -9  13  -2   -3.20    1.80
 -10 -13  -2    0.60    0.60
 -10 -13  -2    1.60    0.60
 -10 -13  -2    0.60    0.40
 -10 -13  -2    0.60    0.60
 -10 -13  -2    1.10    0.60
 -10  13  -2    0.00    2.10
  10  13   2    0.30    0.60
 -11 -13  -2    0.90    0.50
 -11 -13  -2    0.90    0.50
 -11 -13  -2    1.50    0.60
 -11 -13  -2    1.10    0.80
 -11 -13  -2    1.40    0.40
  11  13   2    0.00    0.60
 -11  13  -2    0.60    2.00
 -12 -13  -2    5.20    0.70
 -12 -13  -2    6.60    0.50
 -12  13  -2    6.50    2.20
  12  13   2    6.90    0.70
 -13 -13  -2   14.80    1.10
  13  13   2   14.50    1.10
 -14 -13  -2    4.60    0.60
  14  13   2    4.40    0.60
  15  13   2    9.90    0.80
  15  13   2   10.30    0.80
  15  14  -2    4.20    0.50
 -14 -14   2   34.40    1.50
  14  14  -2   32.40    1.40
 -13 -14   2   66.59    2.30
 -13 -14   2   64.29    2.60
  13  14  -2   65.69    2.60
  13  14  -2   65.79    2.50
 -12 -14   2   47.00    2.70
 -12 -14   2   48.30    1.80
 -12 -14   2   44.40    2.10
 -12  14   2   44.20    4.20
  12  14  -2   48.50    2.00
  12  14  -2   46.60    2.00
  12  14  -2   49.50    2.00
 -11 -14   2    2.50    0.70
 -11 -14   2    2.30    0.50
  11  14  -2    1.30    0.60
  11  14  -2    2.90    0.50
  11  14  -2    2.30    0.60
 -11  14   2    3.80    1.30
 -11  14   2    0.40    1.80
 -10 -14   2   51.39    2.30
 -10  14   2   52.79    3.50
 -10  14   2   51.79    4.80
  10  14  -2   50.19    2.20
  10  14  -2   49.99    2.10
  10  14  -2   52.69    3.90
  10  14  -2   48.90    2.10
  -9 -14   2   45.20    2.10
   9  14  -2   44.40    1.90
  -9  14   2   47.60    4.70
   9  14  -2   41.50    3.50
  -9  14   2   48.00    3.50
  -8 -14   2   80.49    3.20
  -8  14   2   79.59    4.80
   8  14  -2   74.09    4.90
  -8  14   2   75.09    5.90
  -7 -14   2   -0.10    0.60
  -7 -14   2    1.50    0.80
  -7  14   2    2.50    1.60
  -7  14   2    1.60    2.10
   7  14  -2    1.60    1.20
  -6 -14   2   25.30    2.60
  -6 -14   2   24.90    1.60
  -6 -14   2   27.10    1.30
   6 -14  -2   26.80    1.60
   6  14  -2   26.80    2.40
  -6  14   2   28.30    3.00
   6  14  -2   26.00    2.10
  -5 -14   2    0.20    0.60
   5 -14  -2    2.10    0.60
  -5 -14   2    1.30    0.70
  -5 -14   2    1.90    0.60
  -5  14   2    1.50    0.40
  -5  14   2    2.10    1.50
   4 -14  -2   98.19    3.60
  -4 -14   2   95.89    3.60
  -4  14   2   92.69    3.30
  -4  14   2   99.39    5.60
  -4  14   2   98.39    4.40
   4  14  -2   87.89    6.20
  -4  14   2   96.29    4.20
  -3 -14   2   56.29    2.30
  -3  14   2   57.69    4.10
  -3  14   2   52.79    2.10
   3  14  -2   50.39    4.40
  -3  14   2   55.09    3.10
   2 -14  -2   40.60    2.00
  -2 -14   2   45.30    2.00
  -2  14   2   40.90    1.80
  -2  14   2   41.40    3.60
   2  14  -2   47.40    4.00
  -1 -14   2    0.30    0.50
   1 -14  -2    0.20    0.60
   1  14  -2    1.30    0.50
   1  14  -2   -1.10    1.50
  -1  14   2    1.00    0.50
   0 -14  -2   88.99    3.40
   0 -14   2   90.19    3.40
   0  14  -2   92.69    5.90
   0  14  -2   89.99    3.20
   1 -14   2  384.16   12.80
  -1 -14  -2  380.46   12.80
  -1  14  -2  375.76   12.20
  -1  14  -2  381.06   17.60
  -1  14  -2  374.06   14.30
   2 -14   2   37.90    1.80
  -2 -14  -2   35.60    1.80
  -2  14  -2   40.20    4.00
  -2  14  -2   33.60    2.20
  -2  14  -2   38.80    1.60
  -2  14  -2   34.60    2.20
  -3 -14  -2   59.19    2.40
  -3 -14  -2   60.69    2.60
   3 -14   2   59.89    2.40
  -3  14  -2   63.09    4.80
  -3  14  -2   57.29    2.10
  -4 -14  -2  121.09    4.70
  -4 -14  -2  118.49    4.90
  -4 -14  -2  131.99    7.30
  -4 -14  -2  126.39    4.90
   4  14   2  124.89    6.90
  -4  14  -2  129.49    7.50
  -5 -14  -2   60.29    2.70
  -5 -14  -2   59.99    2.60
  -5 -14  -2   56.99    3.70
  -5  14  -2   58.39    5.40
  -5  14  -2   51.29    4.60
   5  14   2   62.49    4.40
  -6 -14  -2  121.99    4.70
  -6 -14  -2  122.09    4.50
   6  14   2  120.49    4.70
  -6  14  -2  116.29    7.10
   6  14   2  108.39    7.20
  -6  14  -2  123.89    8.00
  -7 -14  -2    0.40    0.60
  -7 -14  -2    1.00    0.70
  -7  14  -2   -0.60    2.00
   7  14   2   -0.30    0.60
   7  14   2    0.50    0.50
  -8 -14  -2   11.20    1.10
  -8 -14  -2   10.50    1.20
  -8  14  -2   16.80    3.30
   8  14   2    8.60    0.80
   8  14   2   11.30    1.00
  -9 -14  -2   19.70    1.30
  -9 -14  -2   19.60    1.30
  -9 -14  -2   18.40    1.10
  -9 -14  -2   16.10    1.40
  -9  14  -2   19.30    3.40
   9  14   2   20.70    1.30
   9  14   2   18.80    1.30
 -10 -14  -2   19.40    2.00
 -10 -14  -2   17.90    1.20
 -10 -14  -2   18.50    1.00
 -10 -14  -2   16.40    1.30
 -10 -14  -2   17.30    1.20
 -10  14  -2   19.10    3.30
  10  14   2   19.80    1.30
  10  14   2   18.00    1.20
 -11 -14  -2   17.60    1.20
 -11 -14  -2   18.90    0.90
 -11 -14  -2   19.50    1.10
 -11 -14  -2   19.80    1.40
 -11  14  -2   18.10    3.00
  11  14   2   18.10    1.20
  11  14   2   17.90    1.20
 -12 -14  -2   14.60    1.10
 -12 -14  -2   14.20    0.60
  12  14   2   14.20    1.10
  12  14   2   13.70    1.00
 -13 -14  -2   29.20    1.30
  13  14   2   26.90    1.30
  13  14   2   24.60    1.30
  14  14   2    0.70    0.40
  14  14   2    2.20    0.40
 -13 -15   2    5.10    0.50
 -12 -15   2    0.90    0.40
 -11 -15   2   47.20    1.90
  11  15  -2   49.99    3.00
 -11  15   2   45.00    4.20
 -10 -15   2    8.50    0.90
  10  15  -2    6.50    1.20
  10  15  -2    7.20    1.40
 -10  15   2    9.40    2.40
  -9 -15   2   23.80    1.50
  -9  15   2   23.50    2.60
  -9  15   2   22.70    3.50
  -8 -15   2   19.40    1.40
  -8  15   2   22.50    3.50
  -8  15   2   21.70    2.70
  -7 -15   2   63.49    2.80
   7 -15  -2   64.99    2.60
  -7  15   2   67.99    5.40
  -7  15   2   63.49    4.30
  -6 -15   2   24.10    1.60
   6 -15  -2   25.40    1.50
  -6 -15   2   23.80    2.30
  -6  15   2   31.10    3.00
  -5 -15   2   -1.40    0.50
  -5 -15   2    0.40    0.50
   5 -15  -2    0.00    0.60
  -5 -15   2    1.10    0.70
  -5  15   2    1.00    1.50
  -4 -15   2   28.50    1.60
   4 -15  -2   32.40    1.70
  -4  15   2   30.80    1.30
  -4  15   2   29.50    3.20
  -4  15   2   34.90    1.70
  -4  15   2   29.30    1.60
  -3 -15   2    5.20    0.70
   3 -15  -2    5.30    0.70
  -3  15   2    4.40    1.10
  -3  15   2    6.60    1.90
  -3  15   2    4.90    0.60
  -2 -15   2   20.70    1.30
   2 -15  -2   21.40    1.40
  -2  15   2   21.90    1.20
   2  15  -2   21.90    1.30
  -2  15   2   18.20    2.00
  -1 -15   2   12.30    1.10
   1 -15  -2   10.90    1.10
  -1  15   2   10.20    1.00
   1  15  -2   11.30    1.00
   0 -15  -2    8.60    0.80
   0 -15   2    7.40    0.80
   0  15  -2    7.70    1.50
   0  15  -2    8.30    0.70
   0  15   2    9.00    0.80
  -1 -15  -2   48.60    2.20
   1 -15   2   49.00    2.20
  -1  15  -2   53.39    2.90
  -1  15  -2   49.10    2.00
   2 -15   2  204.18    7.10
  -2 -15  -2  204.28    7.10
  -2  15  -2  203.68    6.60
  -3 -15  -2    7.50    0.90
  -3 -15  -2    7.00    0.70
  -3 -15  -2    6.20    1.00
   3 -15   2    6.90    0.80
  -3 -15  -2    5.40    0.70
  -4 -15  -2    0.20    0.90
  -4 -15  -2    0.20    0.70
   4 -15   2    0.80    0.60
  -4 -15  -2    0.50    0.60
  -5 -15  -2   38.80    2.00
  -5 -15  -2   38.40    2.10
  -5  15  -2   37.50    4.60
  -6 -15  -2   -1.00    0.60
  -6 -15  -2    0.50    0.60
  -6  15  -2    0.80    2.20
   6  15   2    0.10    1.00
  -7 -15  -2    0.00    0.70
  -7 -15  -2    0.80    0.60
  -7  15  -2   -0.80    2.20
   7  15   2    0.90    1.30
  -8 -15  -2   10.00    0.90
  -8 -15  -2   10.00    1.00
  -8  15  -2   17.00    3.30
   8  15   2   16.60    2.40
  -9 -15  -2    2.50    0.70
  -9 -15  -2    3.80    0.70
  -9 -15  -2    2.90    0.50
   9  15   2    3.70    1.50
  -9  15  -2    1.10    2.00
   9  15   2    3.60    0.60
 -10 -15  -2    1.00    0.50
 -10 -15  -2    1.30    0.40
 -10 -15  -2    0.00    0.50
  10  15   2    0.50    1.20
  10  15   2    0.00    0.50
 -10  15  -2    2.90    2.00
 -11 -15  -2    2.50    0.60
 -11 -15  -2    1.70    0.40
  11  15   2    2.10    0.50
 -12 -15  -2   27.30    1.30
  12  15   2   27.90    1.30
  12  15   2   27.40    1.30
 -12 -16   2    0.00    0.30
 -11 -16   2   72.99    2.60
 -10 -16   2    3.70    0.50
 -10 -16   2    4.20    0.70
   9 -16  -2   26.80    1.40
  -9 -16   2   29.50    1.60
  -9  16   2   31.10    3.70
   8 -16  -2    1.20    0.60
  -8 -16   2    0.30    0.60
  -8  16   2    0.90    2.00
  -7 -16   2   40.10    2.10
   7 -16  -2   46.30    2.00
  -7  16   2   43.30    4.40
  -6 -16   2    1.00    0.60
  -6 -16   2    0.40    0.80
   6 -16  -2   -0.30    0.50
  -6  16   2   -1.20    1.80
  -5 -16   2   15.00    1.30
  -5 -16   2   12.90    0.90
  -5 -16   2   11.10    1.00
   5 -16  -2   16.80    1.20
  -5 -16   2   16.90    2.10
  -4 -16   2    2.60    0.80
  -4 -16   2    2.00    0.60
  -4 -16   2    2.80    0.60
   4 -16  -2    3.40    0.70
  -4  16   2    3.00    0.40
  -3 -16   2   95.89    3.50
   3 -16  -2   95.69    3.60
   3  16  -2   96.79    3.40
  -3  16   2   93.69    3.90
  -3  16   2   89.69    3.90
  -3  16   2   91.89    3.20
  -2 -16   2   25.50    1.50
   2 -16  -2   30.10    1.60
   2  16  -2   28.10    1.40
  -2  16   2   23.00    2.10
  -2  16   2   25.60    1.30
  -1 -16   2   55.49    2.30
   1 -16  -2   59.19    2.40
  -1  16   2   47.40    3.20
   1  16  -2   56.79    2.20
  -1  16   2   55.79    2.20
   1  16  -2   51.69    3.30
   0 -16   2    5.80    0.80
   0 -16  -2    5.50    0.70
   0  16   2    7.20    0.70
   0  16  -2    7.20    0.70
   1 -16   2    0.30    0.60
  -1 -16  -2    0.90    0.50
  -1  16  -2    0.60    0.70
  -1  16  -2    1.10    0.50
   1  16   2   -0.20    0.60
  -1  16  -2    0.70    0.70
  -2 -16  -2   11.30    1.20
   2 -16   2   11.30    1.10
  -2 -16  -2   12.60    1.20
  -2 -16  -2   10.00    1.00
  -2  16  -2   10.10    0.60
  -3 -16  -2  138.29    5.10
  -3 -16  -2  129.99    5.10
  -3 -16  -2  127.69    7.50
  -3 -16  -2  126.39    4.90
   3 -16   2  130.59    4.70
   4 -16   2   14.00    1.20
  -4 -16  -2   12.70    1.60
  -4 -16  -2   12.30    1.40
  -4 -16  -2   12.40    1.30
  -4  16  -2   11.00    2.90
   5 -16   2   36.60    1.80
  -5 -16  -2   38.10    1.90
  -5 -16  -2   38.60    2.00
  -5  16  -2   39.10    4.40
  -6 -16  -2    7.80    0.90
  -6 -16  -2    8.00    0.90
  -6  16  -2    5.10    2.40
  -7 -16  -2   22.60    1.50
  -7 -16  -2   23.10    1.40
  -7  16  -2   20.50    3.50
  -8 -16  -2   18.20    1.20
  -8 -16  -2   19.40    1.30
  -8 -16  -2   23.70    1.30
  -8  16  -2   15.70    3.00
  -9 -16  -2   15.90    0.90
  -9 -16  -2   15.00    1.10
  -9 -16  -2   14.20    1.10
 -10 -16  -2   22.90    1.20
 -10 -16  -2   24.50    1.10
 -11 -16  -2   35.70    1.30
  10 -17  -2    3.20    0.50
 -10 -17   2    3.10    0.50
   9 -17  -2   31.40    1.40
  -9 -17   2   30.20    1.60
  -8 -17   2   14.80    1.20
   8 -17  -2   15.90    1.10
  -7 -17   2   12.90    1.20
   7 -17  -2   11.50    1.00
  -7  17   2    8.40    2.30
   6 -17  -2   72.29    2.80
  -6 -17   2   74.69    3.00
  -6  17   2   67.89    5.30
  -5 -17   2   28.10    2.20
  -5 -17   2   26.70    1.60
   5 -17  -2   26.00    1.40
  -5  17   2   23.60    3.50
  -4 -17   2    8.80    0.90
  -4 -17   2    8.90    0.90
  -4 -17   2   14.60    2.00
   4 -17  -2   10.40    1.10
  -4 -17   2   10.70    1.00
   4  17  -2    7.40    0.80
  -3 -17   2    1.90    0.70
  -3 -17   2    1.10    0.60
  -3 -17   2    1.80    0.60
   3 -17  -2    0.90    0.60
  -3  17   2    1.90    0.40
   3  17  -2    2.20    0.60
  -2 -17   2    1.00    0.50
   2 -17  -2   -0.40    0.50
  -2  17   2   -0.50    0.60
   2  17  -2   -0.10    0.50
   2  17  -2    2.00    1.10
  -2  17   2    0.50    0.40
  -2  17   2    0.70    0.70
  -1 -17   2   52.39    2.20
   1 -17  -2   51.39    2.20
   1  17  -2   55.09    3.00
   1  17  -2   51.59    2.00
  -1  17   2   50.39    2.00
  -1  17   2   52.79    2.90
   0 -17  -2    0.20    0.50
   0 -17   2    0.70    0.50
   0  17  -2   -1.10    0.60
   0  17  -2    0.10    0.40
   0  17  -2   -1.10    0.80
   0  17   2   -0.50    0.50
   0  17   2   -1.20    0.90
  -1 -17  -2   77.69    3.20
  -1 -17  -2   73.89    2.90
   1 -17   2   73.49    2.90
  -1 -17  -2   73.99    3.20
   1  17   2   78.99    2.80
  -1  17  -2   72.09    2.50
   2 -17   2   16.90    1.20
  -2 -17  -2   17.10    1.50
  -2 -17  -2   15.50    1.10
  -2 -17  -2   17.40    1.10
   2  17   2   16.90    1.10
  -3 -17  -2   53.39    2.50
   3 -17   2   52.39    2.20
  -3 -17  -2   56.79    3.50
  -3 -17  -2   54.29    2.40
  -3  17  -2   44.90    4.80
  -4 -17  -2   34.90    1.80
   4 -17   2   37.00    1.70
  -4 -17  -2   36.80    2.00
  -4  17  -2   39.00    4.30
   5 -17   2   38.90    1.70
  -5 -17  -2   34.50    1.90
  -5 -17  -2   37.60    1.90
  -5  17  -2   31.70    4.00
   6 -17   2   23.90    1.30
  -6 -17  -2   21.80    1.50
  -6 -17  -2   25.90    1.50
  -6  17  -2   29.30    3.80
  -7 -17  -2  153.18    5.20
   7 -17   2  138.79    5.00
  -7 -17  -2  140.89    5.30
  -8 -17  -2   14.70    0.90
  -8 -17  -2   13.90    1.10
  -8 -17  -2   15.00    1.10
  -9 -17  -2   59.69    2.10
  -9 -17  -2   60.69    2.30
 -10 -17  -2   43.50    1.50
   9 -18  -2    0.70    0.40
  -8 -18   2    1.00    0.50
   8 -18  -2   -0.30    0.40
   7 -18  -2    6.20    0.60
  -7 -18   2    5.40    0.70
   6 -18  -2    0.10    0.50
  -6 -18   2    0.10    0.50
   6  18  -2   -0.50    0.50
   5 -18  -2   37.80    1.70
  -5 -18   2   39.00    1.90
   5  18  -2   38.20    1.70
  -4 -18   2  102.29    5.60
   4 -18  -2  106.69    3.80
   4  18  -2  108.79    3.60
  -4  18   2   87.89    6.30
  -3 -18   2    4.80    0.70
  -3 -18   2    6.70    0.80
  -3 -18   2    6.80    0.70
   3 -18  -2    5.10    0.70
   3  18  -2    5.00    1.20
   3  18  -2    6.60    0.60
  -2 -18   2    7.00    0.70
  -2 -18   2    8.00    0.80
  -2 -18   2    7.20    0.70
   2 -18  -2    8.30    0.80
   2  18  -2    8.50    0.80
  -2  18   2    7.40    0.50
   2  18  -2    7.20    1.10
  -1 -18   2   45.60    1.90
   1 -18  -2   44.60    1.90
   1  18  -2   43.70    1.70
  -1  18   2   46.20    1.70
   0 -18  -2    1.40    0.50
   0 -18  -2    1.10    0.50
   0 -18  -2    0.90    0.70
   0 -18   2    1.50    0.50
   0  18   2    0.90    0.90
   0  18   2    0.70    0.50
  -1 -18  -2    0.70    0.70
  -1 -18  -2    1.60    0.50
   1 -18   2    0.90    0.50
  -1 -18  -2    1.00    0.40
   1  18   2    1.30    0.50
   1  18   2    4.70    1.20
   2 -18   2    0.40    0.50
  -2 -18  -2    1.50    0.70
  -2 -18  -2   -0.40    0.80
   2  18   2    1.00    0.50
  -2  18  -2   -1.00    1.60
  -3 -18  -2    6.70    0.80
   3 -18   2    6.80    0.70
  -3 -18  -2    6.80    0.80
   3  18   2    5.90    0.70
  -4 -18  -2    1.20    0.60
  -4 -18  -2    1.30    0.60
   4 -18   2    1.60    0.50
  -5 -18  -2    1.00    0.60
  -5 -18  -2    1.20    0.60
   5 -18   2    1.60    0.50
  -6 -18  -2   34.90    1.60
   6 -18   2   33.30    1.50
  -6 -18  -2   31.40    1.60
  -7 -18  -2    0.50    0.50
   7 -18   2    1.30    0.40
  -7 -18  -2   -0.50    0.50
  -8 -18  -2   23.20    1.20
   7 -19  -2   37.90    1.60
  -6 -19   2   13.20    1.00
   6 -19  -2   13.90    0.90
   6  19  -2   11.30    0.80
  -5 -19   2   12.60    1.00
   5 -19  -2   12.70    0.90
   5  19  -2   11.60    0.80
   4 -19  -2    5.00    0.60
   4  19  -2    5.20    0.50
   3 -19  -2   24.70    1.30
   3  19  -2   25.40    1.10
  -2 -19   2   15.10    1.00
  -2 -19   2   16.50    1.10
   2 -19  -2   13.80    1.00
   2 -19  -2   16.00    1.20
   2  19  -2   13.90    0.70
   1 -19  -2   16.50    1.10
  -1 -19   2   14.10    1.10
  -1 -19   2   16.40    1.00
  -1 -19   2   15.40    1.20
   1 -19  -2   16.30    1.10
   1 -19  -2   17.80    1.30
   0 -19  -2   21.30    1.20
   0 -19   2   20.90    1.20
   0 -19  -2   22.00    1.40
   0  19   2   22.70    0.90
   1 -19   2    1.60    0.50
  -1 -19  -2    1.20    0.60
   1  19   2    2.30    0.50
   2 -19   2   17.00    1.10
  -2 -19  -2   17.70    1.20
   2  19   2   16.10    0.90
   3 -19   2   -0.20    0.40
  -3 -19  -2   -0.30    0.50
  -3 -19  -2   -1.10    0.50
   3  19   2   -0.30    0.40
   4 -19   2    1.10    0.50
  -4 -19  -2    1.10    0.50
  -4 -19  -2    0.30    0.50
   4  19   2    0.10    0.40
  -5 -19  -2    0.90    0.50
   5 -19   2   -0.20    0.40
  -5 -19  -2    0.40    0.50
   6 -19   2   76.89    2.80
   3 -20  -2   36.90    1.50
   2 -20  -2    1.50    0.50
   2 -20  -2    0.60    0.40
   1 -20  -2   50.99    2.10
   0 -20   2   24.00    1.20
   0 -20  -2   26.10    1.30
   1 -20   2    1.40    0.40
  -1 -20  -2    2.10    0.50
   2 -20   2    3.80    0.50
   3 -20   2    2.40    0.40
 -21   0   3    1.40    0.40
 -20   0   3   -1.30    0.40
 -20   0   3   -1.00    0.40
 -19   0   3    3.50    0.60
 -19   0   3    4.10    0.70
 -18   0   3    0.00    0.60
 -18   0   3   -0.10    0.60
 -17   0   3   80.99    3.00
 -17   0   3   76.59    3.10
 -16   0   3    0.10    0.60
 -16   0   3    0.30    0.60
 -15   0   3   35.60    1.70
 -15   0   3   34.10    1.80
 -14   0   3   -0.80    0.60
  12   0  -3    1.40    0.80
  11   0  -3  447.36   16.50
  11   0  -3  446.16   19.10
 -11   0   3  424.46   19.20
 -11   0   3  425.66   16.70
 -11   0   3  469.75   16.80
 -10   0   3    0.80    0.80
  10   0  -3   -0.30    0.50
  10   0  -3   -0.80    0.80
 -10   0   3   -0.90    1.50
 -10   0   3   -0.30    1.50
 -10   0   3    0.00    0.60
   9   0  -3    1.00    0.60
  -9   0   3    6.00    1.90
   9   0  -3    1.40    1.00
  -9   0   3    1.40    1.40
   8   0  -3    0.60    0.80
  -8   0   3    1.00    1.40
   8   0  -3   -0.30    0.50
   8   0  -3    0.10    0.80
  -8   0   3   -0.10    1.10
   8   0  -3    0.20    0.50
  -8   0   3    0.70    1.20
  -7   0   3   13.30    2.40
  -7   0   3   12.60    2.10
   7   0  -3   11.60    1.50
  -7   0   3   12.60    1.80
   7   0  -3    8.90    0.90
  -7   0   3   10.20    1.90
   7   0  -3   11.30    1.10
   7   0  -3    9.70    1.30
  -6   0   3   -0.90    1.00
   6   0  -3   -1.00    0.60
   6   0  -3   -1.20    0.70
   6   0  -3   -0.30    0.50
  -6   0   3    3.20    1.10
   6   0  -3   -1.40    0.40
  -6   0   3   -1.30    1.10
  -6   0   3   -2.20    0.50
  -6   0   3    8.20    1.70
   5   0  -3 2963.50  103.29
  -5   0   3 2965.90  145.79
  -5   0   3 2798.52  114.49
  -5   0   3 2863.91  143.59
   5   0  -3 3081.49  103.29
  -5   0   3 2810.22  113.59
   5   0  -3 3063.39  108.09
   5   0  -3 2960.70  116.19
   5   0  -3 2803.82  143.99
  -5   0   3 3068.89  111.49
  -5   0   3 2981.30  143.69
  -5   0   3 3006.50  109.69
  -4   0   3    2.30    1.40
  -4   0   3    1.80    0.80
   4   0  -3   -0.60    0.80
   4   0  -3   -0.20    0.50
  -4   0   3   -0.20    0.90
  -4   0   3   -1.00    0.80
   4   0  -3   -0.70    0.70
   4   0  -3   -0.40    0.50
   4   0  -3    1.00    1.00
  -4   0   3    0.10    0.90
  -4   0   3   -1.00    1.20
  -4   0   3   -0.70    0.90
  -3   0   3 1256.07   64.19
  -3   0   3 1367.96   49.10
  -3   0   3 1227.08   64.29
  -3   0   3 1332.47   51.39
   3   0  -3 1340.47   64.39
   3   0  -3 1312.57   46.10
  -3   0   3 1335.87   59.39
  -2   0   3    0.80    0.80
  -2   0   3    0.00    0.90
  -2   0   3    0.30    0.70
   2   0  -3    0.10    0.70
  -2   0   3   -0.20    0.50
  -1   0   3   51.99    3.10
  -1   0   3   51.89    3.20
   1   0  -3   52.59    3.10
   0   0   3   -0.30    0.30
   0   0   3   -0.40    0.60
   0   0   3   -0.40    0.30
   0   0  -3    0.30    0.50
   0   0  -3   -0.70    0.50
   0   0  -3   -0.10    0.50
   0   0   3    0.00    0.50
   1   0   3 7168.18  351.46
  -1   0  -3 7470.55  277.17
  -1   0  -3 7530.25  241.98
  -1   0  -3 6596.34  356.26
   1   0   3 7341.37  283.37
   2   0   3   -0.30    0.50
   2   0   3   -0.40    0.50
   2   0   3    0.60    0.70
  -2   0  -3    0.00    1.00
  -2   0  -3    0.00    1.00
  -2   0  -3    0.40    1.10
  -2   0  -3    2.40    1.10
   3   0   3 1300.57   50.29
  -3   0  -3 1329.37   43.60
   3   0   3 1231.08   51.39
   3   0   3 1303.57   46.80
   3   0   3 1315.17   50.29
  -3   0  -3 1297.57   49.90
  -3   0  -3 1235.88   48.50
  -3   0  -3 1280.57   45.80
  -3   0  -3 1187.58   63.89
  -4   0  -3    0.90    0.90
  -4   0  -3   -0.80    0.80
   4   0   3    0.70    0.40
   4   0   3    0.10    0.30
   4   0   3   -0.30    0.60
  -4   0  -3    1.00    1.10
  -4   0  -3    0.00    1.00
  -4   0  -3    0.30    1.00
  -5   0  -3  383.46   16.00
  -5   0  -3  391.56   13.90
   5   0   3  366.26   15.80
  -5   0  -3  385.36   20.50
  -5   0  -3  387.96   15.80
  -5   0  -3  387.76   14.80
   5   0   3  372.86   14.30
   5   0   3  391.96   15.30
  -6   0  -3    0.60    1.10
  -6   0  -3    0.10    1.20
  -6   0  -3    0.50    1.10
  -6   0  -3    1.20    1.50
  -6   0  -3   -1.20    1.20
   6   0   3   -0.20    0.40
   6   0   3   -0.10    0.40
   7   0   3 2866.01  105.39
  -7   0  -3 2808.72  112.19
   7   0   3 2782.52  113.39
  -7   0  -3 2851.01  103.09
  -7   0  -3 2888.81  109.89
  -7   0  -3 3054.29  144.29
  -7   0  -3 2944.01   97.79
  -8   0  -3    2.10    1.70
  -8   0  -3    1.60    1.20
   8   0   3    0.20    0.50
   8   0   3    0.60    0.50
  -8   0  -3   -0.70    1.30
  -8   0  -3    1.90    1.10
  -8   0  -3   -0.10    1.60
  -9   0  -3   45.40    4.30
   9   0   3   47.10    2.70
  -9   0  -3   53.29    3.90
  -9   0  -3   55.99    5.50
  -9   0  -3   42.90    3.90
   9   0   3   50.39    2.50
  -9   0  -3   49.40    3.90
  -9   0  -3   47.40    2.00
 -10   0  -3    0.60    0.30
 -10   0  -3    0.70    1.50
 -10   0  -3    2.20    1.70
  10   0   3    0.40    0.60
  10   0   3   -0.10    0.60
 -10   0  -3   -0.90    1.40
 -11   0  -3  172.68    9.60
 -11   0  -3  176.58    9.50
 -11   0  -3  161.58    8.80
  11   0   3  165.28    7.90
  11   0   3  176.28    7.30
  12   0   3   -0.80    0.80
  12   0   3    0.40    0.80
 -12   0  -3    0.50    1.70
 -13   0  -3   53.29    2.30
 -13   0  -3   55.09    2.40
 -14   0  -3    1.10    0.60
 -14   0  -3   -0.30    0.60
 -15   0  -3  198.78    6.80
 -16   0  -3    0.40    0.50
 -17   0  -3  184.58    6.30
 -18   0  -3    0.60    0.50
 -19   0  -3   20.80    1.10
 -21  -1   3   32.60    1.40
 -20  -1   3    2.10    0.50
 -20  -1   3    1.10    0.50
 -20   1   3    1.40    0.50
 -20   1   3    0.80    0.50
 -19  -1   3    3.40    0.60
 -19  -1   3    2.70    0.60
 -19   1   3    3.50    0.70
 -19   1   3    2.30    0.60
 -18  -1   3    0.30    0.50
 -18  -1   3   -0.10    0.60
 -18   1   3    0.10    0.60
 -18   1   3   -0.10    0.50
 -17  -1   3   16.50    1.30
 -17  -1   3   16.00    1.20
 -17   1   3   19.70    1.30
 -17   1   3   16.80    1.30
 -16  -1   3   35.30    1.80
 -16  -1   3   36.70    1.70
 -16   1   3   35.50    1.80
 -16   1   3   35.60    1.80
 -15  -1   3    2.50    0.60
 -15  -1   3    3.10    0.70
 -15   1   3    5.40    0.80
 -15   1   3    3.80    0.70
 -14  -1   3   35.60    1.80
 -14   1   3   40.20    1.90
  13  -1  -3   20.40    2.50
 -13   1   3   20.00    1.30
 -13   1   3   23.00    3.10
  12  -1  -3    8.80    1.80
  12  -1  -3    9.70    1.30
 -12  -1   3   11.70    1.40
 -12  -1   3   11.30    1.20
 -12   1   3   10.80    2.10
  11  -1  -3    4.90    1.30
 -11  -1   3    9.60    1.30
 -11  -1   3    8.00    1.20
  11  -1  -3    5.80    1.00
 -11   1   3    5.20    2.00
  11   1  -3    3.50    1.10
 -10  -1   3   52.49    4.40
 -10  -1   3   60.09    2.90
 -10  -1   3   56.79    3.20
  10  -1  -3   56.59    3.60
  10  -1  -3   63.59    2.90
 -10  -1   3   59.59    5.30
  10   1  -3   66.39    3.10
 -10   1   3   60.79    2.90
  10   1  -3   55.19    3.80
 -10   1   3   59.19    4.50
 -10   1   3   58.39    5.00
 -10   1   3   56.09    2.80
   9  -1  -3  203.48    7.80
  -9  -1   3  196.28    9.80
   9  -1  -3  218.08    9.30
  -9  -1   3  197.68   12.10
   9  -1  -3  211.28    8.70
   9  -1  -3  215.68    7.80
  -9   1   3  193.28    9.80
   9   1  -3  205.88    9.50
  -9   1   3  200.48   10.30
   9   1  -3  213.98    8.00
  -9   1   3  208.68    9.80
  -9   1   3  204.48    8.20
  -9   1   3  179.78   11.80
  -8  -1   3  123.49    6.50
   8  -1  -3  131.29    5.80
   8  -1  -3  117.49    4.70
   8  -1  -3  105.49    5.30
   8  -1  -3  120.99    4.70
  -8  -1   3  116.09    7.70
  -8   1   3  122.79    7.60
  -8   1   3  118.79    5.20
   8   1  -3  120.79    4.90
  -8   1   3  115.39    6.30
  -8   1   3  129.69    6.40
  -8   1   3  116.49    6.80
   8   1  -3  125.39    6.00
  -7  -1   3  321.17   13.30
   7  -1  -3  308.17   12.20
   7  -1  -3  322.27   11.30
  -7  -1   3  311.47   16.80
   7  -1  -3  302.07   11.20
  -7   1   3  312.17   13.30
  -7   1   3  300.97   13.60
  -7   1   3  327.07   13.30
   7   1  -3  305.87   13.20
  -7   1   3  328.67   16.70
   7   1  -3  290.77   11.40
  -7   1   3  289.67   11.90
   7   1  -3  319.27   12.30
  -6  -1   3   33.10    2.20
   6  -1  -3   40.10    2.20
   6  -1  -3   34.30    1.70
  -6  -1   3   36.20    2.40
  -6  -1   3   32.70    3.00
   6  -1  -3   39.90    2.20
  -6  -1   3   37.10    2.40
  -6  -1   3   38.60    2.90
  -6  -1   3   32.10    2.10
   6  -1  -3   35.70    1.70
   6   1  -3   36.20    1.90
  -6   1   3   35.10    2.80
  -6   1   3   40.00    3.10
  -6   1   3   34.20    2.90
  -6   1   3   34.40    2.70
   6   1  -3   33.20    2.40
   6   1  -3   34.20    1.80
  -6   1   3   33.00    2.10
   5  -1  -3   64.39    2.60
   5  -1  -3   61.09    3.00
   5  -1  -3   57.49    3.90
  -5  -1   3   57.59    4.10
   5  -1  -3   54.59    3.00
  -5  -1   3   62.49    3.80
  -5  -1   3   63.29    3.70
   5  -1  -3   59.79    2.50
  -5  -1   3   58.89    3.20
  -5  -1   3   59.49    3.70
  -5   1   3   58.89    3.50
   5   1  -3   64.39    2.70
  -5   1   3   69.19    3.90
  -5   1   3   64.09    3.90
   5   1  -3   56.79    3.30
  -5   1   3   59.79    3.00
   5   1  -3   58.19    2.70
   5   1  -3   61.69    4.00
  -5   1   3   58.69    3.60
   5   1  -3   58.39    3.10
  -4  -1   3  124.29    5.40
  -4  -1   3  124.79    5.50
  -4  -1   3  116.29    6.10
  -4  -1   3  110.69    6.40
   4  -1  -3  116.89    4.90
   4  -1  -3  104.59    4.40
   4  -1  -3  110.79    6.50
   4  -1  -3  123.99    4.50
  -4  -1   3  110.29    6.50
   4   1  -3  123.99    4.60
  -4   1   3  117.39    5.80
  -4   1   3  123.49    5.30
  -4   1   3  112.79    5.50
  -4   1   3  113.19    6.30
  -4   1   3  116.39    5.60
   4   1  -3  108.29    6.50
  -4   1   3  112.79    6.20
  -4   1   3  110.59    6.20
  -3  -1   3 1958.70   72.99
   3  -1  -3 1876.41   68.79
   3  -1  -3 1929.71   68.79
  -3  -1   3 1984.00   88.69
   3  -1  -3 1949.41   95.99
   3  -1  -3 1943.51   95.99
  -3  -1   3 1980.90   76.59
  -3  -1   3 1915.41   95.99
  -3   1   3 1862.51   96.69
   3   1  -3 2010.70   96.09
  -3   1   3 2155.38   76.59
  -3   1   3 1850.21   95.79
  -3   1   3 2093.19   88.49
  -3   1   3 1939.91   74.09
  -3   1   3 1946.01   95.89
  -3   1   3 1997.30   73.09
  -2  -1   3 2385.76  123.99
   2  -1  -3 2504.25  123.99
  -2  -1   3 2453.25   93.99
   2  -1  -3 2468.85  123.99
  -2  -1   3 2631.84   98.89
  -2   1   3 2642.64   98.69
  -2   1   3 2561.94   94.09
  -2   1   3 2436.86  123.89
   2   1  -3 2582.64  123.99
  -2   1   3 2697.03  114.39
   1  -1  -3  932.51   46.90
  -1  -1   3  902.61   46.80
  -1  -1   3  986.40   33.60
   1  -1  -3  891.11   47.00
   1  -1  -3  975.10   46.90
  -1   1   3  949.80   46.90
   1   1  -3 1019.00   43.30
  -1   1   3  976.90   46.90
   1   1  -3  937.91   46.80
   0  -1   3 1008.40   34.90
   0  -1   3  978.30   48.70
   0  -1   3 1011.70   34.90
   0  -1  -3  990.80   48.80
   0  -1  -3 1068.29   45.10
   0  -1   3  993.80   34.90
   0  -1  -3  966.00   49.30
   0  -1   3  978.60   36.50
   0  -1  -3  968.40   48.80
   0   1   3 1025.90   48.90
   0   1  -3  966.40   38.80
   0   1  -3  995.00   33.80
   0   1  -3 1009.60   44.80
   0   1   3 1007.90   35.00
   0   1   3  974.60   48.80
   0   1  -3  945.91   48.60
   1  -1   3 1866.11   68.69
  -1  -1  -3 1917.21   75.69
   1  -1   3 1880.91   91.69
  -1  -1  -3 1765.82   93.09
  -1  -1  -3 2001.70   84.49
   1   1   3 1905.91   65.89
   1   1   3 1941.21   65.89
  -1   1  -3 1849.61   66.79
   1   1   3 1805.72   75.59
   1   1   3 1867.31   91.89
  -1   1  -3 1900.71   63.49
   1   1   3 1880.21   91.89
  -1   1  -3 1771.02   93.09
   1   1   3 1929.11   68.89
  -1   1  -3 1916.01   72.59
  -2  -1  -3   -1.20    1.30
   2  -1   3    0.70    0.80
  -2  -1  -3   -0.30    1.20
  -2  -1  -3    1.70    1.10
  -2  -1  -3    2.20    1.00
  -2   1  -3   -0.10    1.00
  -2   1  -3    1.40    1.10
   2   1   3   -0.10    0.30
   2   1   3    0.60    1.00
  -2   1  -3    0.20    1.20
   2   1   3   -0.90    0.60
   2   1   3    1.20    1.00
   2   1   3    0.00    0.30
  -2   1  -3   -0.40    1.00
  -2   1  -3    1.10    1.10
   2   1   3    0.20    0.70
  -3  -1  -3 1406.06   46.40
  -3  -1  -3 1330.57   48.70
  -3  -1  -3 1330.97   49.50
  -3  -1  -3 1280.67   51.69
  -3  -1  -3 1422.06   53.19
   3  -1   3 1356.76   54.79
  -3  -1  -3 1273.27   68.09
  -3   1  -3 1321.07   68.19
  -3   1  -3 1378.06   48.90
   3   1   3 1446.86   50.09
   3   1   3 1389.76   53.89
   3   1   3 1401.66   66.89
  -3   1  -3 1417.46   53.19
  -3   1  -3 1406.36   46.50
  -3   1  -3 1342.57   51.79
   3   1   3 1311.27   54.99
  -4  -1  -3  322.27   12.20
  -4  -1  -3  325.27   12.40
  -4  -1  -3  312.87   17.30
  -4  -1  -3  329.77   11.80
  -4  -1  -3  328.47   13.60
   4  -1   3  314.87   13.30
  -4  -1  -3  322.17   13.30
  -4   1  -3  330.07   12.60
  -4   1  -3  303.17   17.30
   4   1   3  342.97   13.30
  -4   1  -3  321.07   13.30
   4   1   3  327.67   12.30
  -4   1  -3  339.27   13.70
   4   1   3  314.17   13.60
  -4   1  -3  339.57   11.90
  -5  -1  -3   37.20    1.90
  -5  -1  -3   34.90    2.90
  -5  -1  -3   37.10    2.40
  -5  -1  -3   36.40    2.80
  -5  -1  -3   36.60    2.50
   5  -1   3   38.60    1.90
  -5  -1  -3   36.30    3.60
   5   1   3   37.30    1.90
   5   1   3   42.00    2.10
  -5   1  -3   39.00    2.70
   5   1   3   35.80    2.30
  -5   1  -3   41.00    2.60
  -5   1  -3   36.50    2.90
  -5   1  -3   36.50    3.50
  -5   1  -3   40.00    2.90
  -6  -1  -3  184.78   10.90
  -6  -1  -3  174.58    7.70
  -6  -1  -3  180.78    8.50
  -6  -1  -3  182.78    8.50
  -6  -1  -3  185.38    7.20
   6   1   3  184.98    7.70
  -6   1  -3  172.68    8.50
  -6   1  -3  179.48    7.90
  -6   1  -3  180.48    7.30
  -6   1  -3  181.88    8.60
  -6   1  -3  183.28   10.80
   6   1   3  160.28    7.00
  -7  -1  -3  513.95   27.00
   7  -1   3  475.15   18.40
  -7  -1  -3  490.45   20.90
  -7  -1  -3  510.75   19.20
  -7  -1  -3  504.05   18.00
  -7   1  -3  486.45   18.20
  -7   1  -3  500.15   20.80
   7   1   3  489.55   18.80
  -7   1  -3  477.75   20.90
  -7   1  -3  485.05   19.30
  -7   1  -3  566.54   27.20
   7   1   3  491.55   20.30
  -8  -1  -3    1.50    1.80
  -8  -1  -3   -0.30    1.30
   8  -1   3    0.90    0.40
  -8  -1  -3    0.70    1.30
  -8   1  -3    1.90    1.20
  -8   1  -3    0.40    1.30
   8   1   3    1.40    0.70
  -8   1  -3    0.10    1.60
   8   1   3    2.10    0.70
  -8   1  -3    0.10    1.30
  -8   1  -3    0.30    1.60
  -9  -1  -3   52.59    4.10
  -9  -1  -3   55.99    5.60
   9  -1   3   54.39    2.50
  -9  -1  -3   52.09    3.90
  -9  -1  -3   52.89    2.30
   9  -1   3   50.89    2.70
  -9   1  -3   52.79    3.50
   9   1   3   52.49    2.80
  -9   1  -3   47.10    3.90
  -9   1  -3   51.29    4.20
  -9   1  -3   60.89    4.20
  -9   1  -3   51.59    4.60
  -9   1  -3   55.39    5.50
   9   1   3   49.70    3.10
 -10  -1  -3   13.20    2.60
 -10  -1  -3   16.50    2.70
 -10  -1  -3   14.10    1.00
  10  -1   3   16.50    1.30
  10  -1   3   15.80    1.40
 -10   1  -3   18.30    2.80
 -10   1  -3   17.10    3.30
  10   1   3   15.30    1.60
 -10   1  -3   16.70    2.80
  10   1   3   14.20    1.70
  10   1   3   18.00    1.20
 -10   1  -3   11.70    2.70
  10   1   3   16.70    1.10
 -11  -1  -3    2.80    1.80
  11  -1   3    3.30    0.90
  11  -1   3    3.00    0.80
 -11  -1  -3    3.20    1.90
 -11  -1  -3    3.40    0.60
 -11   1  -3    2.70    1.70
  11   1   3    2.10    0.60
  11   1   3    2.40    1.00
 -11   1  -3    2.30    1.80
 -11   1  -3    1.40    2.00
 -12  -1  -3   45.60    4.80
 -12  -1  -3   46.80    2.10
  12  -1   3   46.20    3.00
 -12   1  -3   55.29    5.10
  12   1   3   44.30    3.40
 -12   1  -3   52.69    4.80
 -12   1  -3   51.59    4.60
 -12   1  -3   49.50    2.00
 -13  -1  -3   64.29    2.70
 -13  -1  -3   60.49    2.50
 -13   1  -3   66.09    2.50
 -13   1  -3   64.29    5.70
 -13   1  -3   61.69    2.70
 -13   1  -3   61.29    2.50
 -14  -1  -3   46.10    2.30
 -14  -1  -3   52.29    2.20
 -14   1  -3   48.90    2.20
 -14   1  -3   51.69    2.30
 -14   1  -3   50.79    2.20
 -15  -1  -3   24.90    1.40
 -15   1  -3   22.20    1.50
 -15   1  -3   22.70    1.40
 -15   1  -3   22.70    1.40
 -16  -1  -3    5.10    0.70
 -16   1  -3    4.60    0.70
 -16   1  -3    4.80    0.70
 -17  -1  -3    0.20    0.50
 -17   1  -3    0.70    0.50
 -18  -1  -3    1.40    0.50
 -18   1  -3    1.20    0.50
 -19  -1  -3   23.50    1.10
 -19   1  -3   24.40    1.10
 -20  -2   3    1.00    0.50
 -20  -2   3   -0.10    0.40
 -20   2   3    1.00    0.50
 -20   2   3   -0.30    0.50
 -19  -2   3  127.79    4.40
 -19  -2   3  129.99    4.50
 -19   2   3  132.59    4.60
 -19   2   3  126.49    4.50
 -18  -2   3   24.80    1.50
 -18  -2   3   26.20    1.40
 -18   2   3   26.10    1.40
 -18   2   3   25.50    1.50
 -17  -2   3  107.99    4.10
 -17  -2   3  115.89    4.00
 -17   2   3  113.09    4.00
 -17   2   3  109.19    4.10
 -16  -2   3   37.30    1.80
 -16  -2   3   34.80    1.60
 -16  -2   3   37.90    1.90
 -16   2   3   40.10    1.90
 -16   2   3   36.70    1.80
 -15  -2   3  154.38    5.30
 -15  -2   3  146.69    5.30
 -15  -2   3  153.38    5.50
 -15   2   3  160.78    5.50
 -15   2   3  151.88    5.30
 -14  -2   3    9.20    0.80
  14  -2  -3    6.90    2.10
 -14  -2   3    7.60    0.90
 -14   2   3    9.10    0.90
 -14   2   3    9.20    2.40
  13  -2  -3   21.50    2.00
 -13  -2   3   19.40    1.40
 -13  -2   3   19.80    1.20
  13  -2  -3   17.40    2.30
 -13  -2   3   15.70    1.50
 -13   2   3   17.10    2.70
 -13   2   3   18.80    1.30
 -12  -2   3  528.05   19.50
  12  -2  -3  488.25   21.50
 -12  -2   3  507.35   18.50
  12  -2  -3  503.05   18.80
 -12   2   3  506.35   22.80
 -11  -2   3    7.50    0.90
  11  -2  -3    5.20    1.30
  11  -2  -3    7.70    1.10
 -11  -2   3    8.30    2.50
 -11  -2   3    7.60    0.80
 -11  -2   3    9.30    1.50
 -11  -2   3    7.90    1.20
 -11   2   3    9.10    2.20
 -11   2   3    6.90    2.50
 -10  -2   3  539.85   19.60
 -10  -2   3  545.15   21.00
  10  -2  -3  561.34   22.70
 -10  -2   3  584.24   29.60
  10  -2  -3  552.34   19.70
 -10   2   3  534.05   23.60
 -10   2   3  512.25   22.50
 -10   2   3  540.55   20.10
 -10   2   3  525.95   20.10
 -10   2   3  563.24   23.50
   9  -2  -3  720.63   30.40
  -9  -2   3  784.12   41.90
   9  -2  -3  845.82   28.70
   9  -2  -3  811.32   28.70
  -9  -2   3  790.72   30.30
  -9   2   3  802.42   32.00
   9   2  -3  837.72   29.10
  -9   2   3  801.52   33.00
  -9   2   3  833.62   33.20
  -9   2   3  833.12   29.70
   8  -2  -3  500.45   18.80
  -8  -2   3  494.75   26.10
   8  -2  -3  433.26   18.70
   8  -2  -3  500.95   17.50
   8  -2  -3  507.25   17.50
  -8  -2   3  487.05   20.10
  -8   2   3  498.45   20.70
   8   2  -3  486.95   17.90
  -8   2   3  475.95   25.60
  -8   2   3  493.75   20.00
  -8   2   3  509.85   18.40
   8   2  -3  459.75   20.60
  -8   2   3  506.05   20.70
   7  -2  -3    0.20    0.40
   7  -2  -3    0.20    0.40
  -7  -2   3    1.10    1.30
   7  -2  -3    0.30    0.70
   7  -2  -3    0.20    0.60
  -7  -2   3    1.90    1.40
  -7  -2   3   -0.50    0.60
  -7   2   3    0.40    0.60
  -7   2   3   -0.60    1.00
   7   2  -3    0.70    0.90
  -7   2   3    1.90    1.30
   7   2  -3    0.10    0.60
  -7   2   3   -0.50    1.40
  -7   2   3    0.50    1.30
   6  -2  -3  256.27    9.00
   6  -2  -3  257.57    9.90
  -6  -2   3  247.28   12.90
  -6  -2   3  257.57   10.80
  -6  -2   3  231.28   10.50
   6  -2  -3  265.37    9.90
  -6  -2   3  265.17   13.00
  -6  -2   3  215.18   10.80
   6  -2  -3  243.18    9.10
  -6  -2   3  244.28   13.60
   6   2  -3  248.68    9.40
  -6   2   3  252.97   11.00
  -6   2   3  251.87   10.70
  -6   2   3  260.57    9.80
  -6   2   3  238.18   13.30
  -6   2   3  257.27   11.10
  -5  -2   3   13.40    1.60
  -5  -2   3   14.30    1.70
   5  -2  -3   15.30    1.00
   5  -2  -3   16.80    1.40
   5  -2  -3   14.80    0.90
  -5  -2   3   20.40    2.20
   5  -2  -3   15.10    1.40
  -5  -2   3   12.10    1.60
   5  -2  -3   13.00    1.70
  -5  -2   3   12.90    1.70
  -5   2   3   12.60    1.30
  -5   2   3   22.40    2.30
   5   2  -3   14.20    1.20
   5   2  -3   15.70    1.60
  -5   2   3   14.10    1.20
  -5   2   3   13.30    1.70
  -5   2   3   14.60    2.00
   5   2  -3   15.60    1.90
   5   2  -3   15.90    1.50
   4  -2  -3  980.60   34.80
  -4  -2   3  862.11   40.00
   4  -2  -3  971.20   36.60
  -4  -2   3  941.31   48.70
  -4  -2   3  976.50   37.40
  -4  -2   3  994.30   45.10
   4  -2  -3  949.80   36.50
  -4  -2   3 1056.29   39.10
   4  -2  -3 1026.30   34.80
   4  -2  -3  907.11   48.70
  -4   2   3 1005.90   48.40
  -4   2   3  994.70   37.40
  -4   2   3 1015.70   38.80
  -4   2   3 1061.99   38.00
  -4   2   3 1000.40   44.60
   4   2  -3  999.40   35.00
  -4   2   3 1012.40   48.40
   4   2  -3 1007.10   48.90
  -4   2   3  976.20   49.00
  -3  -2   3 2706.63  124.39
   3  -2  -3 2929.11   96.69
   3  -2  -3 2672.63  134.69
   3  -2  -3 2622.34  134.69
  -3  -2   3 2802.02  107.49
   3  -2  -3 2729.63  100.99
  -3  -2   3 2835.32  102.39
   3  -2  -3 2714.03  101.09
   3  -2  -3 2725.73   96.59
  -3  -2   3 2477.55  110.59
  -3   2   3 2642.34  103.79
  -3   2   3 2777.42  134.59
  -3   2   3 2986.60  107.29
  -3   2   3 2978.80  124.19
   3   2  -3 2828.02  134.89
  -3   2   3 2740.43  102.39
  -3   2   3 2733.73  134.59
  -2  -2   3    7.00    1.30
  -2  -2   3   14.90    1.70
   2  -2  -3   15.70    1.10
  -2  -2   3    8.50    1.30
   2  -2  -3   13.60    1.80
   2  -2  -3   12.20    1.70
  -2  -2   3   13.60    1.70
   2   2  -3   17.80    2.00
  -2   2   3   11.90    1.70
  -2   2   3   10.90    1.70
  -2   2   3   13.40    1.70
  -2   2   3   12.20    1.60
   1  -2  -3   38.50    2.30
   1  -2  -3   41.10    2.80
  -1  -2   3   39.60    2.80
  -1  -2   3   41.50    1.80
  -1  -2   3   38.50    2.60
   1  -2  -3   41.20    2.90
   1   2  -3   36.90    2.70
  -1   2   3   37.60    2.80
  -1   2   3   41.40    2.90
   1   2  -3   40.00    2.70
   0  -2  -3  483.35   19.40
   0  -2   3  456.85   19.50
   0  -2   3  475.15   16.50
   0  -2  -3  447.46   23.40
   0  -2   3  446.76   23.30
   0  -2  -3  466.15   21.70
   0  -2   3  456.35   17.50
   0  -2   3  486.45   16.60
   0  -2  -3  457.65   23.50
   0   2  -3  461.75   23.10
   0   2  -3  482.85   16.30
   0   2  -3  462.75   18.60
   0   2  -3  492.65   21.30
   0   2   3  482.65   23.50
   0   2   3  439.96   19.30
   0   2   3  455.95   23.40
   0   2  -3  477.35   21.30
  -1  -2  -3  617.44   31.50
  -1  -2  -3  628.74   32.00
  -1  -2  -3  658.13   26.20
  -1  -2  -3  629.74   29.00
   1  -2   3  636.54   23.50
   1  -2   3  665.33   25.20
   1   2   3  599.14   22.60
  -1   2  -3  637.84   23.20
   1   2   3  646.24   22.60
  -1   2  -3  645.44   22.00
  -1   2  -3  628.94   24.50
   1   2   3  622.44   26.10
  -1   2  -3  629.84   25.00
   1   2   3  653.93   31.70
   1   2   3  633.84   31.60
  -2  -2  -3 2030.10   83.09
  -2  -2  -3 2053.49  100.69
   2  -2   3 2190.28   80.89
   2  -2   3 2052.89   75.19
  -2  -2  -3 1935.71  102.29
  -2   2  -3 2078.39   69.79
  -2   2  -3 2087.09   73.39
  -2   2  -3 2096.59   79.79
   2   2   3 1998.70   81.29
  -2   2  -3 2087.09   77.89
   2   2   3 2126.39   75.59
   2   2   3 2039.60  100.89
   2   2   3 2030.50   72.29
   2   2   3 2012.50   82.99
   2   2   3 2106.09   72.29
  -3  -2  -3  388.26   22.20
  -3  -2  -3  423.86   15.10
  -3  -2  -3  419.46   16.10
  -3  -2  -3  459.15   17.60
  -3  -2  -3  431.36   18.30
  -3  -2  -3  408.36   15.80
  -3   2  -3  436.46   17.20
   3   2   3  414.76   17.50
  -3   2  -3  451.55   15.40
  -3   2  -3  436.06   16.20
   3   2   3  444.46   15.30
   3   2   3  438.26   15.30
  -3   2  -3  420.26   22.30
  -3   2  -3  440.66   17.50
   3   2   3  417.56   21.70
   3   2   3  459.35   16.30
   3   2   3  415.56   17.90
  -4  -2  -3  114.29    7.70
  -4  -2  -3  124.49    5.30
  -4  -2  -3  135.69    6.50
  -4  -2  -3  127.29    5.40
   4  -2   3  123.69    5.50
  -4  -2  -3  128.59    6.20
  -4  -2  -3  136.69    5.20
   4   2   3  126.19    6.00
  -4   2  -3  120.59    6.10
   4   2   3  127.39    7.20
   4   2   3  134.69    5.40
  -4   2  -3  134.69    5.50
   4   2   3  131.59    4.80
   4   2   3  130.29    5.80
   4   2   3  133.69    4.80
   4   2   3  128.29    4.80
  -4   2  -3  128.59    5.80
  -4   2  -3  124.29    7.80
  -4   2  -3  136.09    6.30
  -5  -2  -3  207.88    9.80
  -5  -2  -3  199.78    7.90
  -5  -2  -3  201.18    8.40
  -5  -2  -3  203.68    8.20
  -5  -2  -3  214.28   12.10
  -5  -2  -3  218.68    9.40
   5   2   3  201.98    7.60
  -5   2  -3  214.88    9.40
   5   2   3  204.48    8.30
  -5   2  -3  224.48    8.90
   5   2   3  207.48    7.60
   5   2   3  217.58    9.00
   5   2   3  206.68    9.30
  -5   2  -3  211.78    9.50
  -5   2  -3  217.38    8.30
  -5   2  -3  203.58   12.00
  -6  -2  -3  852.61   29.30
  -6  -2  -3  845.82   31.00
  -6  -2  -3  831.92   31.00
  -6  -2  -3  855.41   33.90
  -6  -2  -3  877.31   43.60
   6   2   3  830.92   33.90
  -6   2  -3  799.82   33.90
  -6   2  -3  826.12   31.30
  -6   2  -3  880.71   33.50
   6   2   3  827.22   29.70
  -6   2  -3  874.51   29.70
   6   2   3  816.02   29.70
   6   2   3  807.72   31.40
  -6   2  -3  890.51   43.60
  -7  -2  -3   21.90    2.50
  -7  -2  -3   22.30    3.40
  -7  -2  -3   23.40    2.40
  -7  -2  -3   20.50    1.50
  -7   2  -3   23.50    3.40
   7   2   3   21.40    1.90
  -7   2  -3   23.00    2.60
  -7   2  -3   20.20    2.90
  -7   2  -3   22.80    2.80
  -7   2  -3   21.80    2.40
   7   2   3   22.00    1.20
   7   2   3   21.60    1.20
   7   2   3   21.20    1.70
  -8  -2  -3    9.00    1.90
  -8  -2  -3    7.80    0.90
  -8  -2  -3   12.00    2.10
  -8  -2  -3   12.20    2.90
  -8   2  -3   11.80    2.50
  -8   2  -3    8.30    2.50
  -8   2  -3   12.50    2.20
   8   2   3    9.10    0.90
   8   2   3    9.30    1.40
   8   2   3   11.70    1.40
   8   2   3    9.90    0.90
  -8   2  -3    9.50    1.80
  -8   2  -3   10.20    2.00
   9  -2   3   52.89    2.20
  -9  -2  -3   49.80    2.30
  -9  -2  -3   52.59    5.80
  -9  -2  -3   51.39    4.00
  -9   2  -3   49.90    3.60
  -9   2  -3   43.10    3.80
   9   2   3   45.50    2.50
  -9   2  -3   48.00    4.40
   9   2   3   47.10    3.20
   9   2   3   48.80    2.40
  -9   2  -3   54.89    4.10
  -9   2  -3   54.39    5.50
   9   2   3   55.79    3.30
  -9   2  -3   49.00    4.30
 -10  -2  -3    0.60    1.30
 -10  -2  -3    1.00    0.50
  10  -2   3    0.70    0.40
 -10   2  -3    0.50    1.30
 -10   2  -3   -2.40    1.70
  10   2   3   -0.10    0.80
 -10   2  -3   -0.80    1.50
 -10   2  -3    0.90    1.50
 -10   2  -3    1.60    1.60
  10   2   3   -0.30    0.60
  11  -2   3    4.30    0.80
 -11  -2  -3    1.80    1.70
  11  -2   3    2.80    0.60
 -11  -2  -3    3.50    0.70
 -11   2  -3    5.30    2.10
 -11   2  -3    2.80    2.00
  11   2   3    3.80    1.30
  11   2   3    3.70    0.90
 -11   2  -3    4.10    2.20
 -11   2  -3    1.70    2.20
 -12  -2  -3   74.69    3.30
  12  -2   3   76.09    3.90
 -12  -2  -3   71.79    5.70
 -12   2  -3   80.49    5.90
 -12   2  -3   78.79    2.90
 -12   2  -3   78.09    6.40
  12   2   3   75.49    4.80
 -12   2  -3   81.89    5.80
 -13  -2  -3   48.60    2.40
 -13  -2  -3   52.09    2.40
 -13  -2  -3   55.29    2.20
 -13   2  -3   56.09    5.00
 -13   2  -3   52.19    2.40
 -13   2  -3   58.69    2.30
 -13   2  -3   54.79    2.30
 -14  -2  -3   28.40    1.60
 -14  -2  -3   31.90    1.60
 -14   2  -3   26.10    1.60
 -14   2  -3   30.80    1.60
 -14   2  -3   29.20    1.60
 -15  -2  -3   38.30    1.80
 -15   2  -3   41.30    1.90
 -15   2  -3   37.40    1.90
 -15   2  -3   37.80    1.90
 -16  -2  -3   85.59    3.10
 -16   2  -3   83.09    3.20
 -16   2  -3   77.89    3.10
 -17  -2  -3    0.40    0.50
 -17   2  -3    0.20    0.50
 -17   2  -3    0.00    0.60
 -18  -2  -3   31.40    1.50
 -18   2  -3   30.70    1.40
 -19  -2  -3   21.00    1.00
 -19   2  -3   19.10    1.00
 -20  -3   3    5.10    0.60
 -20   3   3    4.50    0.60
 -19  -3   3    1.70    0.50
 -19  -3   3    1.80    0.50
 -19   3   3    2.00    0.60
 -19   3   3    1.10    0.60
 -18  -3   3    1.30    0.60
 -18  -3   3    1.30    0.50
 -18   3   3    1.40    0.60
 -18   3   3    0.20    0.60
 -17  -3   3   35.40    1.70
 -17  -3   3   34.00    1.60
 -17  -3   3   35.10    1.70
 -17   3   3   32.40    1.80
 -17   3   3   35.90    1.70
 -16  -3   3   53.39    2.30
 -16  -3   3   53.59    2.20
 -16  -3   3   55.39    2.40
 -16   3   3   57.79    2.40
 -16   3   3   54.59    2.30
 -15  -3   3   31.20    1.70
 -15  -3   3   32.80    1.60
 -15  -3   3   32.60    1.60
 -15   3   3   31.50    1.60
 -15   3   3   33.50    1.80
 -14  -3   3    0.10    0.60
 -14  -3   3    0.70    0.50
 -14  -3   3    0.00    0.60
 -14   3   3    1.00    0.60
 -14   3   3    2.00    1.60
 -14   3   3    0.40    0.60
 -13  -3   3   12.20    1.10
 -13  -3   3   15.20    1.70
 -13  -3   3   16.10    1.80
 -13  -3   3   13.70    1.00
  13  -3  -3   13.10    2.10
 -13   3   3   14.20    1.10
 -13   3   3   19.50    2.80
 -12  -3   3   59.99    3.60
 -12  -3   3   59.19    2.50
  12  -3  -3   64.79    4.00
  12  -3  -3   64.19    3.20
 -12  -3   3   61.39    3.20
 -12  -3   3   61.89    2.40
 -12   3   3   53.89    4.30
 -12   3   3   63.29    5.80
 -11  -3   3   11.60    1.10
  11  -3  -3   10.10    1.20
 -11  -3   3    7.20    2.70
 -11  -3   3    9.70    1.70
  11  -3  -3    9.20    1.60
 -11  -3   3   12.00    1.50
 -11  -3   3   11.70    1.20
 -11   3   3    8.10    2.60
 -11   3   3   14.10    3.30
 -11   3   3   13.70    2.20
  10  -3  -3   80.89    3.50
  10  -3  -3   86.29    4.60
 -10  -3   3   77.99    4.40
 -10  -3   3   75.09    3.70
  10  -3  -3   88.59    3.60
 -10  -3   3   85.09    6.80
 -10   3   3   91.29    6.30
 -10   3   3   81.89    5.80
   9  -3  -3    1.30    0.80
   9  -3  -3    1.30    0.60
  -9  -3   3    0.80    0.90
  -9  -3   3    2.00    1.80
   9  -3  -3    0.40    0.80
   9  -3  -3    1.10    0.50
  -9   3   3    2.00    1.60
  -9   3   3    0.40    0.60
  -9   3   3    1.50    1.60
  -9   3   3   -1.00    1.60
   8  -3  -3  143.99    5.70
  -8  -3   3  156.98    9.70
   8  -3  -3  157.08    5.80
   8  -3  -3  154.78    6.60
   8  -3  -3  156.38    6.60
  -8   3   3  163.48    7.70
  -8   3   3  141.99    7.90
  -8   3   3  144.29    7.90
  -8   3   3  153.68    6.20
  -7  -3   3   44.40    4.20
  -7  -3   3   45.30    3.20
   7  -3  -3   45.40    2.00
  -7  -3   3   46.70    3.20
   7  -3  -3   44.60    2.00
   7  -3  -3   44.10    2.60
   7  -3  -3   44.10    2.60
  -7   3   3   40.30    3.30
  -7   3   3   46.80    2.50
  -7   3   3   34.70    3.60
  -7   3   3   40.50    3.60
  -7   3   3   46.90    3.50
  -7   3   3   40.50    3.60
  -6  -3   3  136.59    6.50
  -6  -3   3  139.89    7.40
   6  -3  -3  138.09    4.90
   6  -3  -3  118.69    4.90
  -6  -3   3  123.59    6.40
  -6  -3   3  126.09    6.20
   6  -3  -3  120.49    5.60
   6  -3  -3  134.69    5.60
  -6   3   3  123.39    5.40
  -6   3   3  129.29    6.10
  -6   3   3  141.69    6.50
  -6   3   3  135.89    6.70
  -5  -3   3   16.80    2.10
  -5  -3   3   16.90    2.00
  -5  -3   3   18.30    2.00
   5  -3  -3   21.80    1.60
   5  -3  -3   21.70    1.60
   5  -3  -3   20.80    1.20
  -5  -3   3   20.60    2.00
   5  -3  -3   19.90    1.20
  -5   3   3   18.20    1.30
  -5   3   3   23.60    2.40
   5   3  -3   22.30    2.30
  -5   3   3   20.40    2.00
  -5   3   3   21.70    2.20
  -5   3   3   20.00    1.50
   4  -3  -3  141.49    6.00
   4  -3  -3  141.69    5.60
  -4  -3   3  132.99    6.80
   4  -3  -3  141.79    5.50
   4  -3  -3  139.79    8.10
  -4  -3   3  152.08    6.80
  -4  -3   3  135.59    8.10
  -4  -3   3  150.08    6.60
   4  -3  -3  153.88    6.20
  -4   3   3  154.18    7.60
   4   3  -3  149.39    8.30
  -4   3   3  141.19    6.40
  -4   3   3  148.99    6.70
  -4   3   3  154.58    7.60
  -4   3   3  148.09    6.70
  -4   3   3  146.29    6.90
   3  -3  -3 3187.08  113.49
   3  -3  -3 3002.30  108.49
  -3  -3   3 3208.98  114.89
   3  -3  -3 3072.49  108.49
  -3  -3   3 2960.70  151.28
  -3  -3   3 3259.17  120.69
   3  -3  -3 3069.39  151.28
  -3  -3   3 2925.21  124.29
   3  -3  -3 3027.90  113.39
  -3   3   3 3011.10  116.49
   3   3  -3 3084.29  151.28
  -3   3   3 3255.97  139.29
  -3   3   3 3072.29  120.29
  -3   3   3 3162.08  150.98
  -3   3   3 3155.68  150.98
  -2  -3   3 1571.74   80.49
   2  -3  -3 1653.53   57.69
  -2  -3   3 1699.93   64.29
   2  -3  -3 1611.24   80.49
   2  -3  -3 1536.95   80.49
  -2  -3   3 1730.53   61.19
  -2  -3   3 1604.74   66.29
  -2   3   3 1612.14   61.89
  -2   3   3 1724.03   74.19
  -2   3   3 1716.83   64.19
  -2   3   3 1561.34   80.29
  -2   3   3 1656.63   80.39
   2   3  -3 1636.64   80.49
   1  -3  -3 1476.35   57.59
   1  -3  -3 1408.36   70.19
  -1  -3   3 1346.67   70.09
  -1  -3   3 1429.56   57.89
  -1  -3   3 1508.45   50.29
   1  -3  -3 1423.56   70.29
  -1  -3   3 1487.55   50.29
  -1   3   3 1445.76   55.99
  -1   3   3 1398.66   70.19
   1   3  -3 1348.17   70.09
   1   3  -3 1371.86   64.69
   1   3  -3 1448.06   48.30
  -1   3   3 1356.96   57.79
  -1   3   3 1535.95   64.89
   0  -3  -3   88.49    5.30
   0  -3   3   87.19    3.40
   0  -3  -3   80.69    5.20
   0  -3  -3   86.79    4.50
   0  -3   3   83.19    3.80
   0  -3   3   81.49    4.60
   0  -3   3   89.69    3.40
   0   3  -3   85.29    3.70
   0   3   3   83.09    4.50
   0   3   3   79.99    5.20
   0   3   3   87.89    5.30
   0   3  -3   84.89    4.80
   0   3   3   82.89    4.50
   0   3  -3   94.09    4.40
   0   3  -3   91.19    4.00
   0   3  -3   85.69    4.10
   0   3  -3   93.69    4.30
  -1  -3  -3  118.99    5.50
  -1  -3  -3  106.19    6.30
  -1  -3  -3  113.59    5.90
   1  -3   3  109.89    4.90
   1  -3   3  108.49    4.60
  -1  -3  -3  103.09    6.30
   1  -3   3  109.19    5.60
  -1   3  -3  109.19    4.60
  -1   3  -3  111.39    5.10
   1   3   3  113.59    6.40
   1   3   3  100.19    5.40
   1   3   3  115.59    6.40
  -1   3  -3  114.39    4.90
  -1   3  -3  109.89    5.20
   1   3   3  111.99    4.40
   2  -3   3  621.74   26.50
   2  -3   3  659.23   23.50
  -2  -3  -3  632.54   31.70
  -2  -3  -3  593.84   32.30
  -2  -3  -3  665.63   26.50
   2  -3   3  661.23   25.30
   2   3   3  665.03   22.70
  -2   3  -3  662.03   23.50
  -2   3  -3  646.34   24.90
   2   3   3  631.04   31.90
  -2   3  -3  662.23   25.40
   2   3   3  620.34   26.30
   2   3   3  613.24   23.90
   2   3   3  585.54   22.70
  -2   3  -3  670.13   22.30
   2   3   3  582.54   25.70
   3  -3   3   71.29    4.20
  -3  -3  -3   68.79    4.90
   3  -3   3   73.99    2.80
  -3  -3  -3   74.19    4.30
  -3  -3  -3   69.19    4.20
  -3   3  -3   69.59    4.00
   3   3   3   66.99    3.10
   3   3   3   68.59    3.90
   3   3   3   75.19    3.40
  -3   3  -3   71.99    3.80
   3   3   3   70.59    3.10
   3   3   3   67.09    4.50
  -3   3  -3   78.69    4.00
  -3   3  -3   72.89    3.60
   3   3   3   72.59    3.80
  -4  -3  -3  275.77   15.40
  -4  -3  -3  273.07   10.90
  -4  -3  -3  286.67   12.60
  -4  -3  -3  279.97   12.00
  -4  -3  -3  272.77   10.20
   4   3   3  269.47   10.30
   4   3   3  284.87   11.00
  -4   3  -3  288.57   10.60
   4   3   3  281.27   12.20
   4   3   3  264.97   10.30
  -4   3  -3  279.77   12.10
   4   3   3  298.57   12.00
  -4   3  -3  281.57   11.20
  -4   3  -3  288.97   12.00
  -5  -3  -3   35.40    2.10
  -5  -3  -3   30.60    2.00
  -5  -3  -3   32.20    2.90
  -5  -3  -3   33.00    2.60
  -5  -3  -3   30.60    3.50
   5   3   3   31.00    1.70
  -5   3  -3   27.90    2.40
   5   3   3   31.10    2.30
  -5   3  -3   31.80    2.80
  -5   3  -3   25.40    2.60
   5   3   3   30.50    1.70
   5   3   3   32.50    2.10
  -5   3  -3   35.10    3.00
  -6  -3  -3    0.60    0.70
  -6  -3  -3    1.70    1.50
  -6  -3  -3    0.70    1.20
  -6  -3  -3    1.60    1.60
   6   3   3    0.30    0.60
  -6   3  -3    0.80    1.30
  -6   3  -3    0.50    1.60
  -6   3  -3    1.10    1.40
  -6   3  -3    2.80    1.70
   6   3   3    1.40    0.70
   6   3   3    1.50    0.90
   6   3   3    0.10    0.50
  -6   3  -3    1.90    1.40
  -7  -3  -3    9.60    2.50
  -7  -3  -3    9.00    1.20
  -7  -3  -3    6.50    1.70
  -7  -3  -3   11.50    2.30
  -7   3  -3    8.30    2.10
  -7   3  -3   11.70    2.10
  -7   3  -3   11.30    2.70
  -7   3  -3    7.00    1.60
   7   3   3    6.90    0.90
   7   3   3    8.30    1.50
  -7   3  -3   11.90    2.50
  -8  -3  -3  186.98    9.50
  -8  -3  -3  204.28   12.70
  -8  -3  -3  193.98    7.40
  -8  -3  -3  194.28    7.90
  -8   3  -3  186.88   10.00
  -8   3  -3  219.38   12.80
   8   3   3  203.78    7.70
  -8   3  -3  193.68    9.20
   8   3   3  201.98    9.20
  -8   3  -3  193.48    9.90
  -8   3  -3  184.28    8.50
  -9  -3  -3   -0.70    1.60
  -9  -3  -3    0.10    1.30
  -9  -3  -3    2.10    0.70
  -9  -3  -3   -0.50    0.50
  -9   3  -3   -1.70    1.50
  -9   3  -3    0.60    1.90
  -9   3  -3   -0.20    1.30
  -9   3  -3    1.00    1.60
   9   3   3    0.00    0.80
   9   3   3    0.10    0.60
  -9   3  -3   -1.20    1.30
  -9   3  -3    0.10    1.30
 -10  -3  -3   53.59    2.60
 -10  -3  -3   51.49    4.30
 -10   3  -3   58.59    4.50
 -10   3  -3   59.29    4.60
  10   3   3   51.99    2.80
 -10   3  -3   52.99    4.00
[truncated: 1,505,882 more chars]
