# Supplementary material for: Positional Isomerism in the N^N Ligand: How Much Difference Does a Methyl Group Make in [Cu(P^P)(N^N)]+ Complexes?
Source: Molecules. 2020 Jun 15;25(12):2760. doi: 10.3390/molecules25122760 (PMC7356218; doi:10.3390/molecules25122760)
Supplement: Supplementary file 1 [file molecules-25-02760-s001.zip › Supporting Information.docx]

Supporting Material to accompany:

Positional isomerism in the N^N ligand: How much difference does a methyl group make in [Cu(P^P)(N^N)]+ complexes?

Fabian Brunner 1, Alessandro Prescimone 1, Edwin C. Constable 1 , Catherine E. Housecroft 1*

1Department of Chemistry, University of Basel, BPR 1096, Mattenstrasse 24a, CH-4058 Basel, Switzerland; fabian.brunner@unibas.ch (F.B.); alessandro.prescimone@unibas.ch (A.P.); edwin.constable@unibas.ch (E.C.C.)

Fig. S1. ESI-MS of [Cu(POP)(5,6'-Me2bpy)][PF6].

Fig. S2. ESI-MS of [Cu(xantphos)(5,6'-Me2bpy)][PF6].


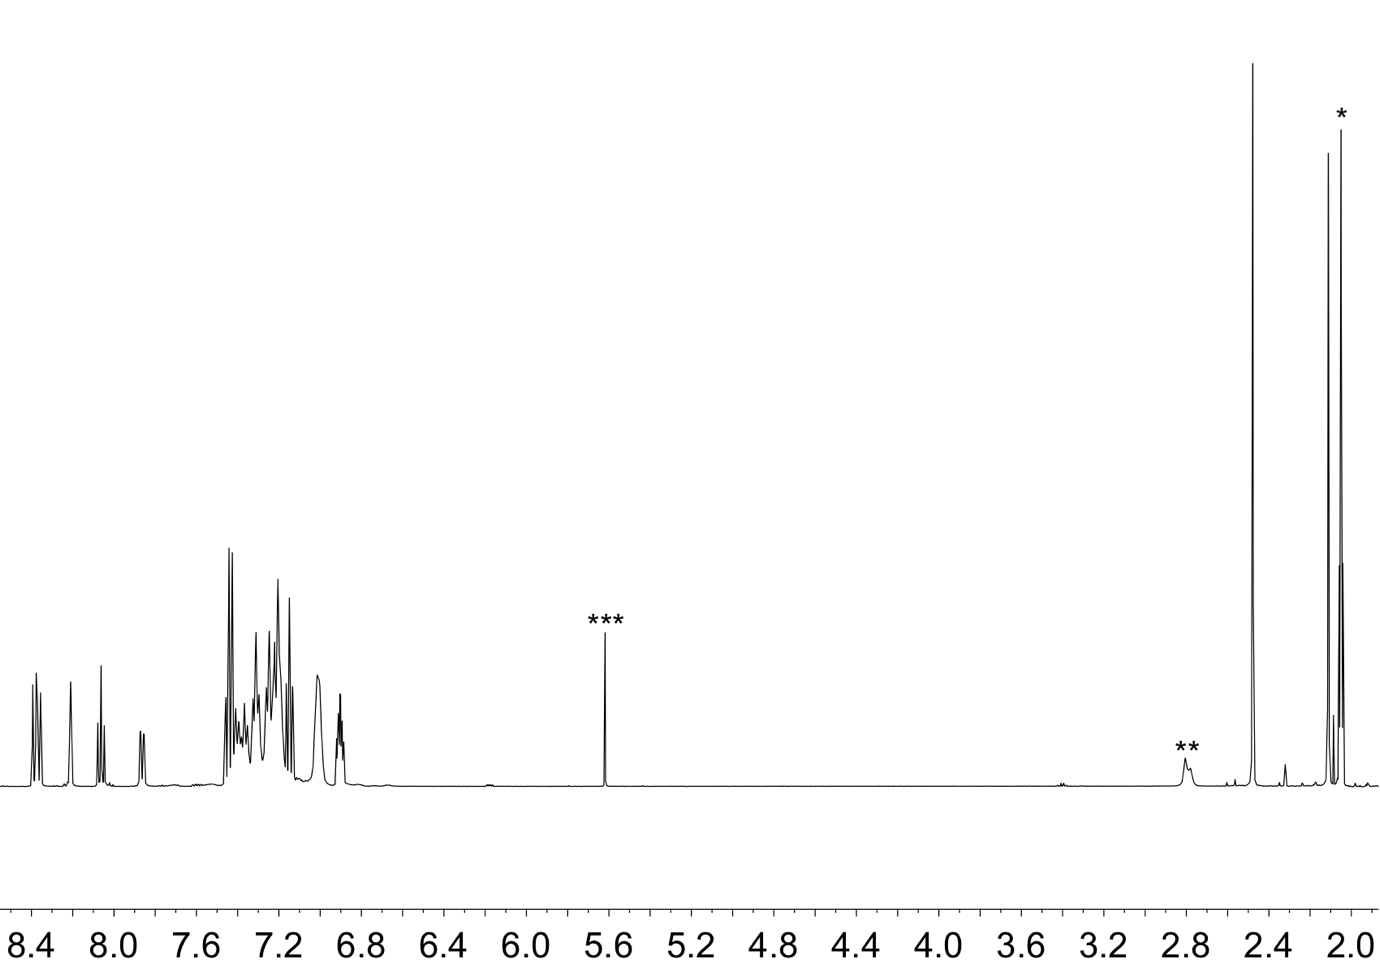


Figure S3. 1H NMR spectrum of [Cu(POP)(5,6'-Me2bpy)][PF6] in acetone-*d*6 (500 MHz, 298 K). * = residual acetone-*d*5; ** = H2O / HOD; *** = CH2Cl2.


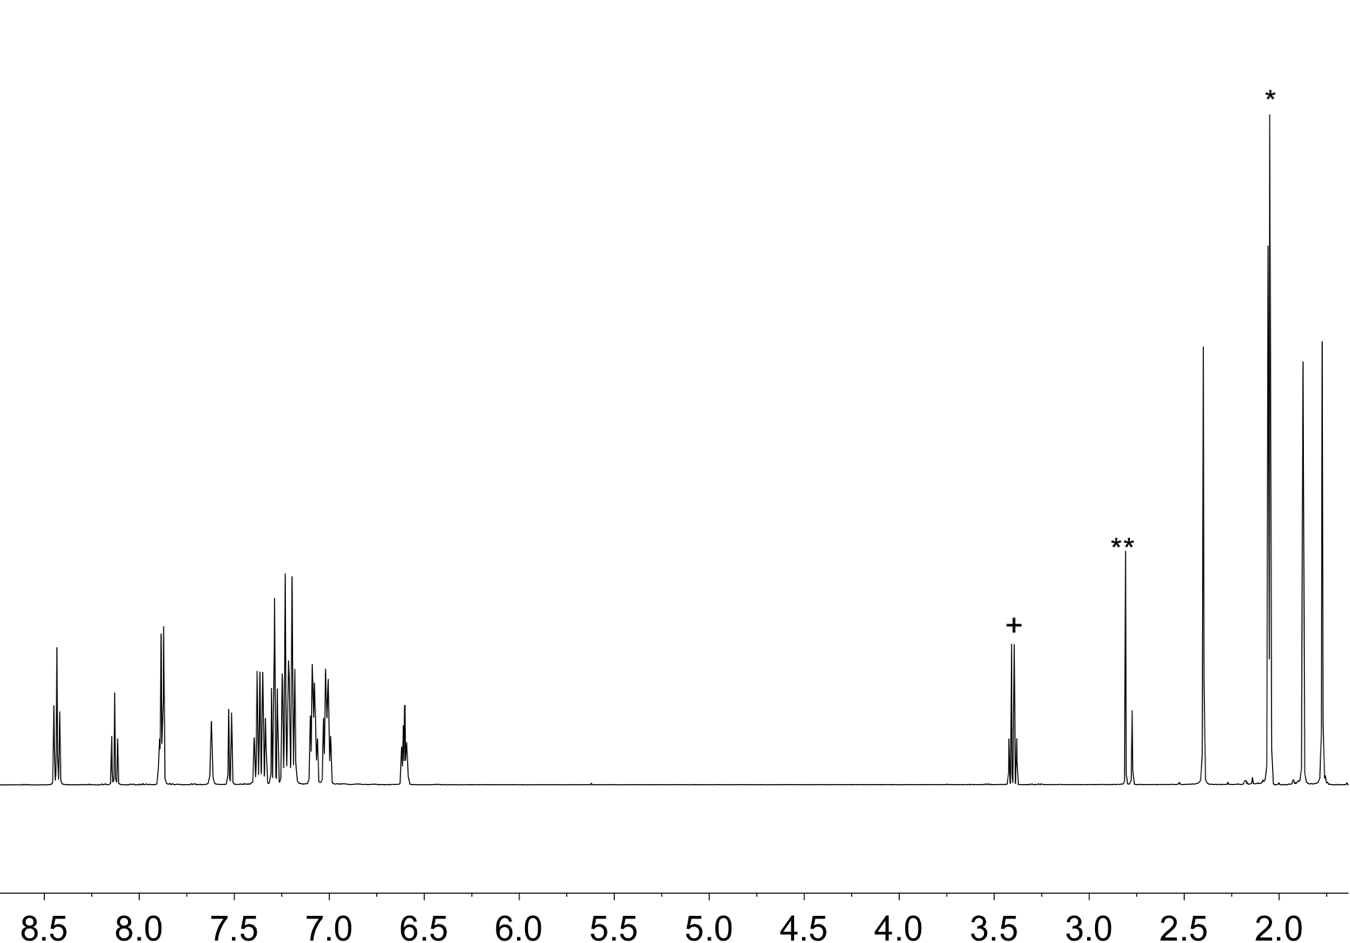


Figure S4. 1H NMR spectrum of [Cu(xantphos)(5,6'-Me2bpy)][PF6] in acetone-*d*6 (500 MHz, 298 K). * = residual acetone-*d*5 overlapping with the signal for HMe-A5; ** = H2O / HOD; + = CH2 of Et2O. Scale: *δ* / ppm.


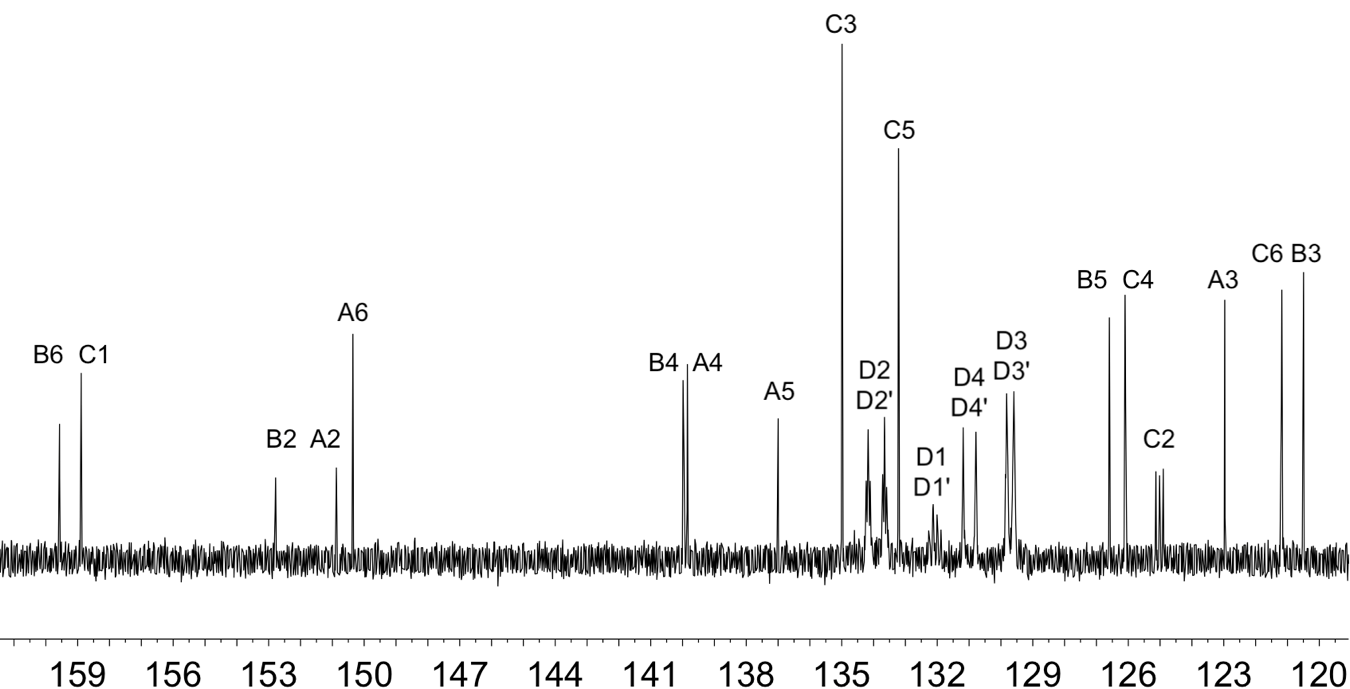


Figure S5. Part of the 13C{1H} NMR spectrum of [Cu(POP)(5,6'-Me2bpy)][PF6] in acetone-*d*6 (500 MHz, 298 K). Scale: *δ* / ppm.


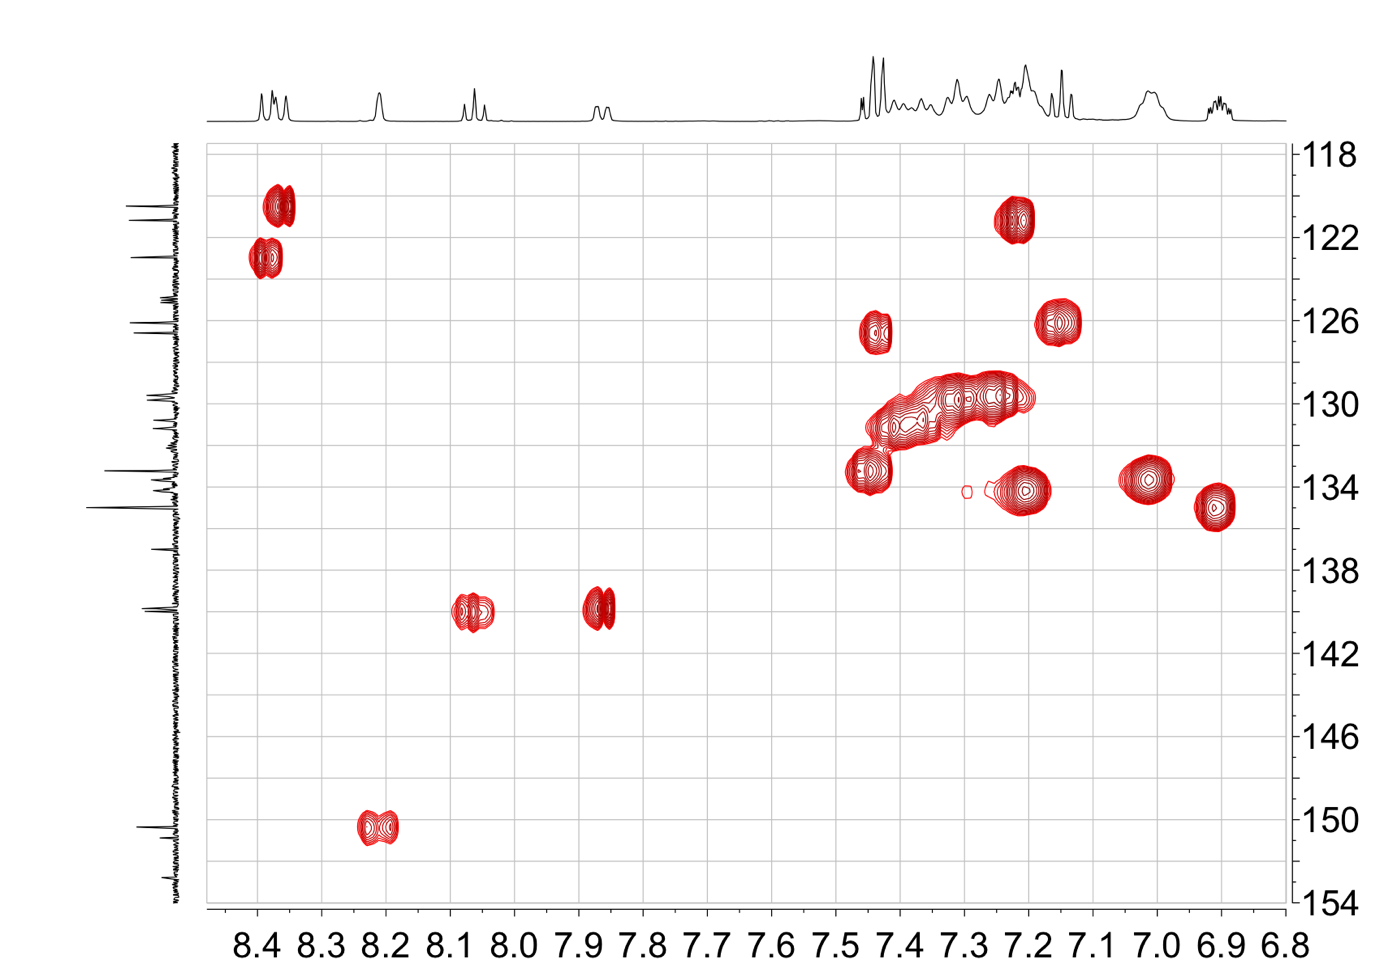


Figure S6. HMQC spectrum of [Cu(POP)(5,6'-Me2bpy)][PF6] in acetone-*d*6 (500 MHz 1H, 126 MHz 13C, 298 K). Scale: *δ* / ppm.


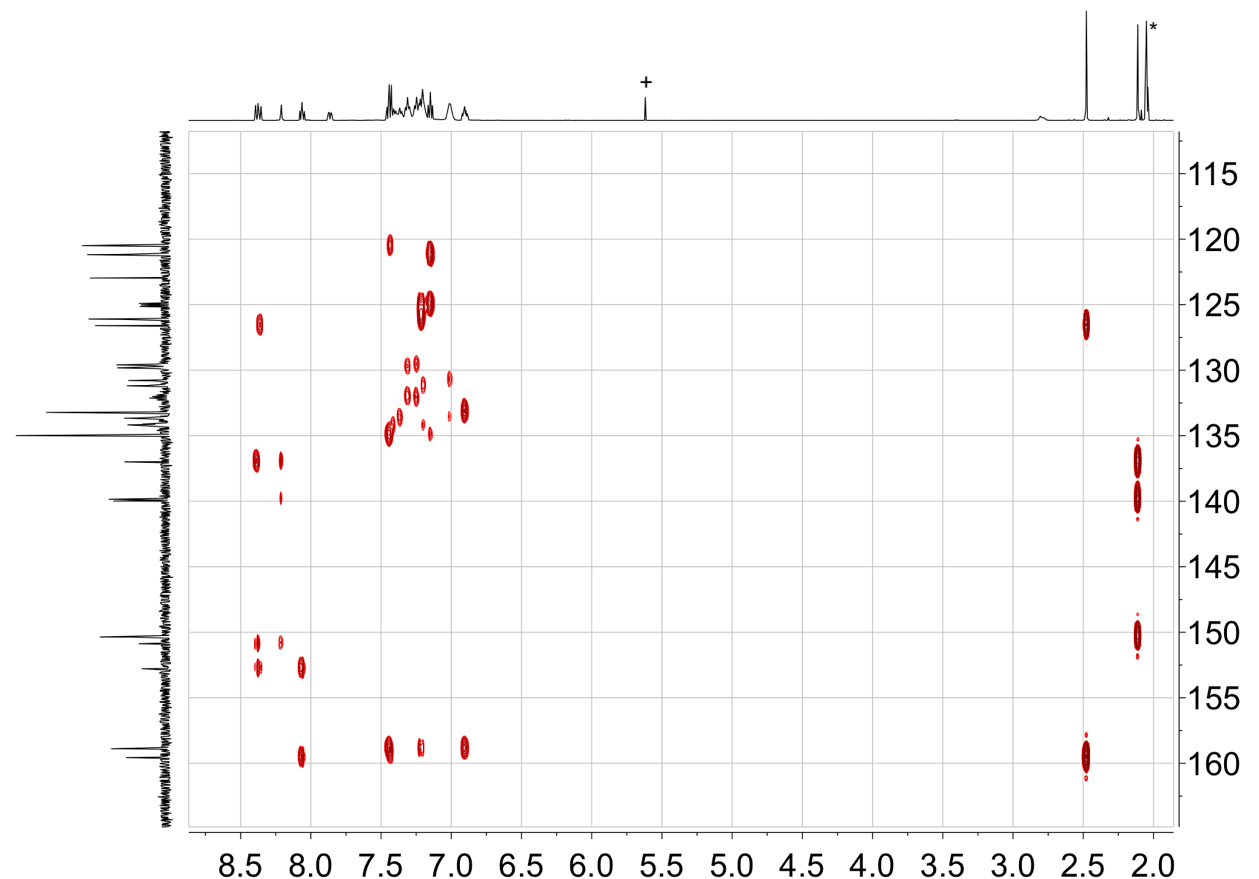


Figure S7. HMBC spectrum of [Cu(POP)(5,6'-Me2bpy)][PF6] in acetone-*d*6 (500 MHz 1H, 126 MHz 13C, 298 K). * = residual acetone-d5; + = CH2Cl2. Scale: *δ* / ppm.


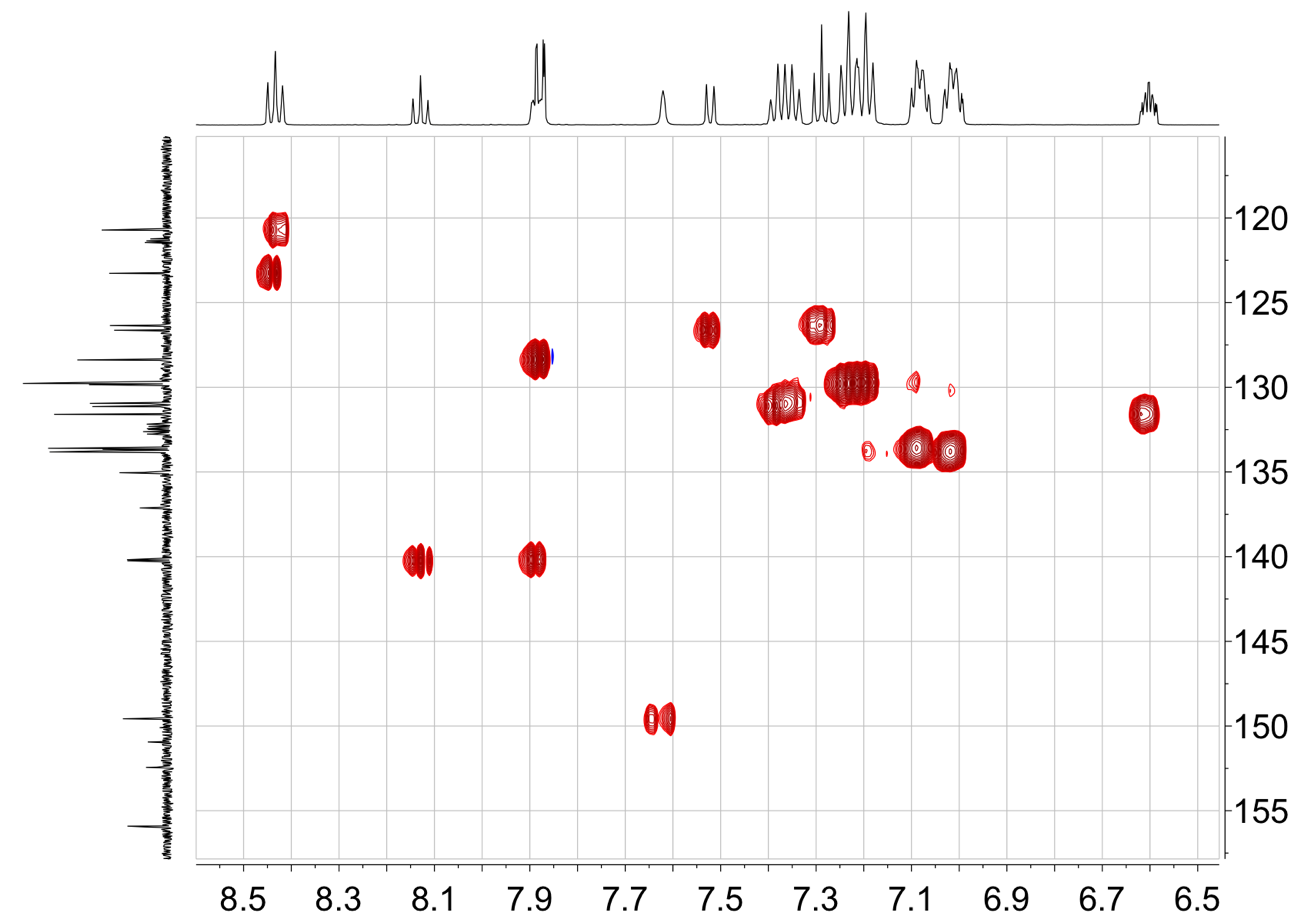


Figure S8. HMQC spectrum of [Cu(xantphos)(5,6'-Me2bpy)][PF6] in acetone-*d*6 (500 MHz 1H, 126 MHz 13C, 298 K). Scale: *δ* / ppm.


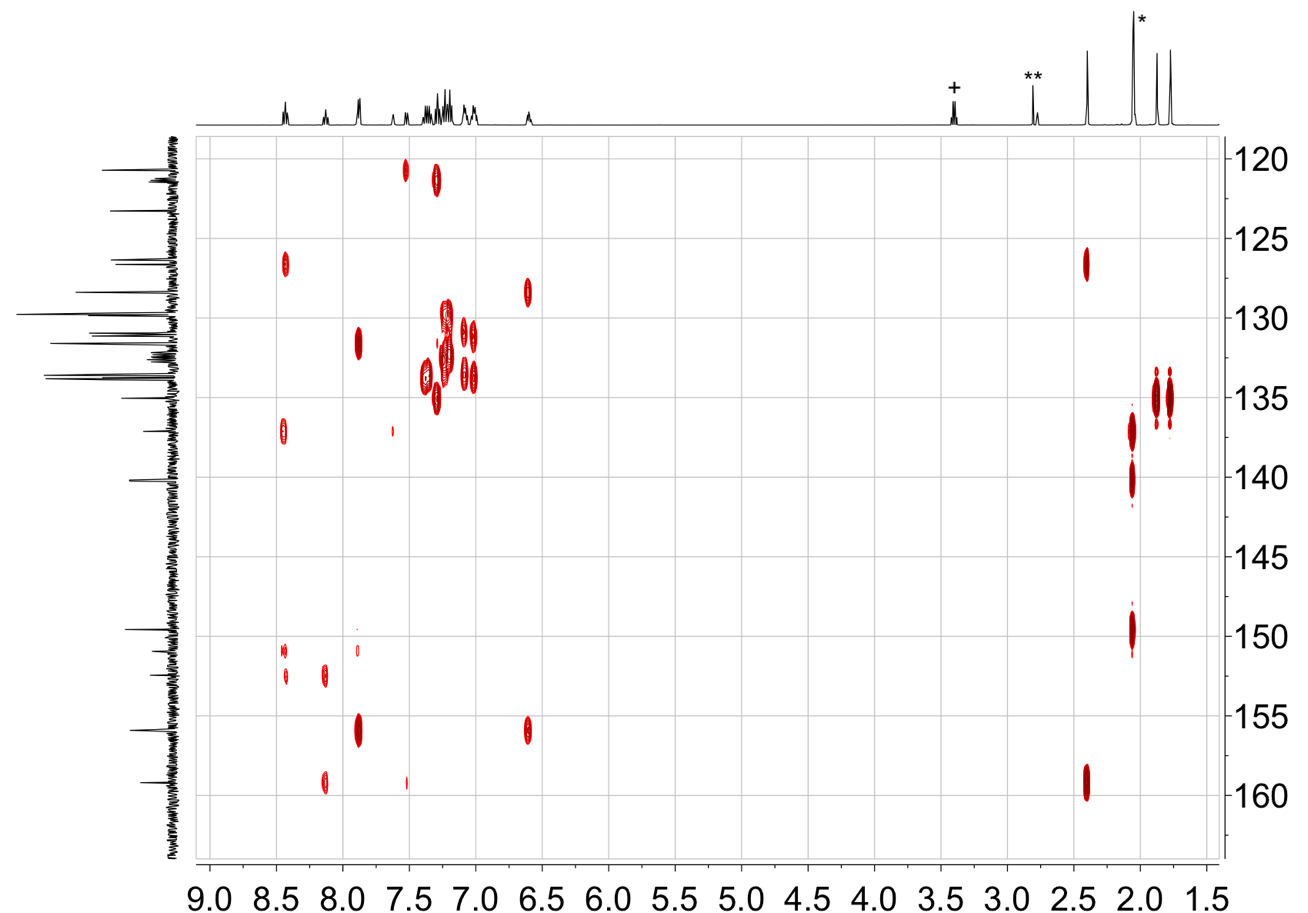


Figure S9. HMBC spectrum of [Cu(xantphos)(5,6'-Me2bpy)][PF6] in acetone-*d*6 (500 MHz 1H, 126 MHz 13C, 298 K). * = Residual acetone-*d*5 overlapping with the signal for HMe-A5; ** = H2O / HOD; + = CH2 of Et2O. Scale: *δ* / ppm.


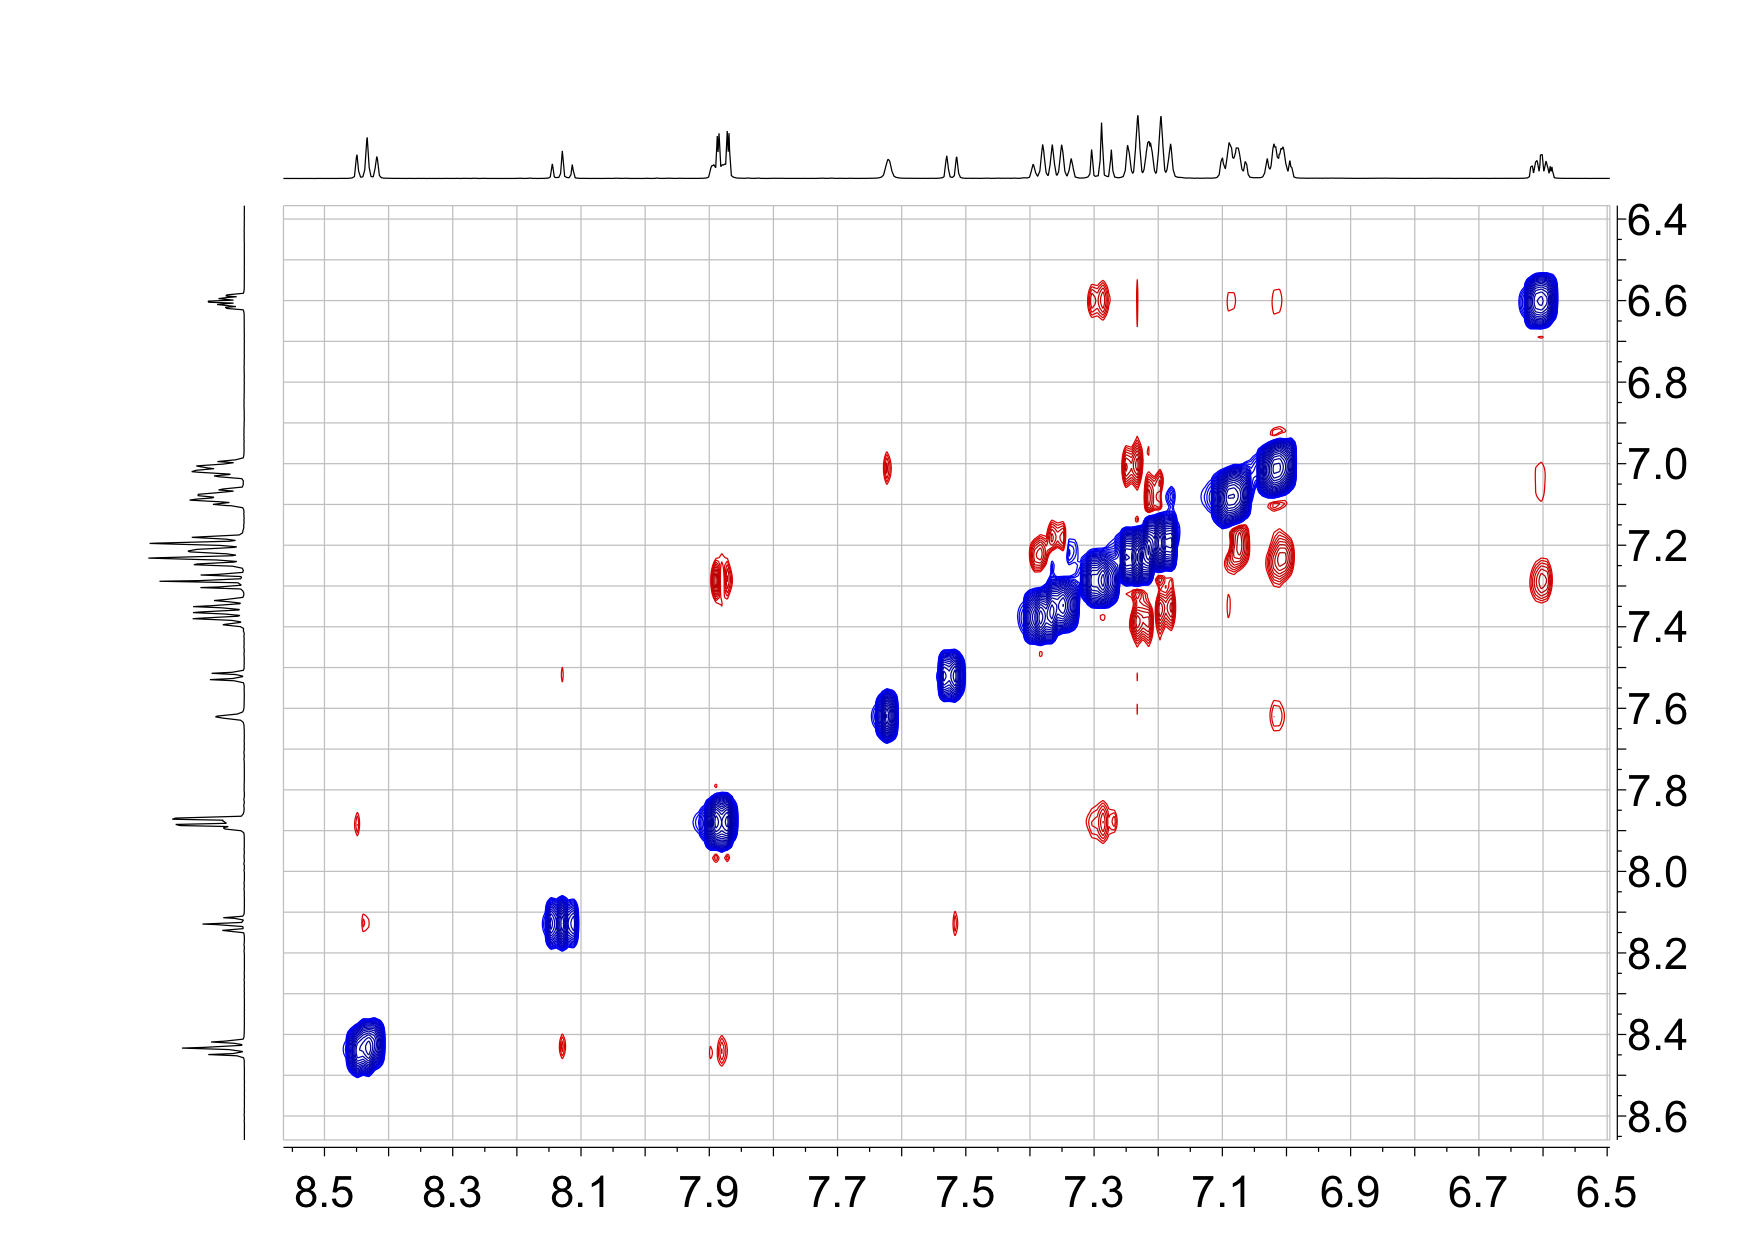


Figure S10. Part of the NOESY spectrum of [Cu(xantphos)(5,6'-Me2bpy)][PF6] in acetone-*d*6 (500 MHz 1H, 298 K).

Table S1. Values of *A*1, *A*2, τ1 and τ2  for the biexponential fit to the decay using the equation: *τ* = Σ*Aiτi*/Σ*Ai*

| **Compound** | ***A*1** | **τ1** | ***A*2** | **τ2** | **τ** |
| --- | --- | --- | --- | --- | --- |
| [Cu(POP)(5,6'-Me2bpy)][PF6] | 0.6612 | 8.236 | 0.2997 | 2.463 | 6.435 |
| [Cu(xantphos)(5,6'-Me2bpy)][PF6] | 0.614 | 6.384 | 0.3115 | 2.12 | 4.949 |
